# Supplementary material for: Multi-Objective Control of Air Conditioning Improves Cost, Comfort and System Energy Balance
Source: Preprints.org preprint supplement (doi:10.20944/preprints201808.0120.v3), 2018-09-10
Supplement: Supplementary file 1 [file supplementary]

## Sheet: RefBldgLargeOfficeNew2004_Chica
					145								20	12	20	12
Date/Time	Environment:Site Outdoor Air Drybulb Temperature [C](TimeStep)	BUILDING_ROOF:Surface Outside Face Incident Solar Radiation Rate per Area [W/m2](TimeStep)	BASEMENT:Zone Air Temperature [C](TimeStep)	CORE_BOTTOM:Zone Air Temperature [C](TimeStep)	CORE_MID:Zone Air Temperature [C](TimeStep)	CORE_TOP:Zone Air Temperature [C](TimeStep)	GROUNDFLOOR_PLENUM:Zone Air Temperature [C](TimeStep)	MIDFLOOR_PLENUM:Zone Air Temperature [C](TimeStep)	PERIMETER_BOT_ZN_1:Zone Air Temperature [C](TimeStep)	PERIMETER_BOT_ZN_2:Zone Air Temperature [C](TimeStep)	PERIMETER_BOT_ZN_3:Zone Air Temperature [C](TimeStep)	PERIMETER_BOT_ZN_4:Zone Air Temperature [C](TimeStep)	PERIMETER_MID_ZN_1:Zone Air Temperature [C](TimeStep)	PERIMETER_MID_ZN_2:Zone Air Temperature [C](TimeStep)	PERIMETER_MID_ZN_3:Zone Air Temperature [C](TimeStep)	PERIMETER_MID_ZN_4:Zone Air Temperature [C](TimeStep)	PERIMETER_TOP_ZN_1:Zone Air Temperature [C](TimeStep)	PERIMETER_TOP_ZN_2:Zone Air Temperature [C](TimeStep)	PERIMETER_TOP_ZN_3:Zone Air Temperature [C](TimeStep)	PERIMETER_TOP_ZN_4:Zone Air Temperature [C](TimeStep)	TOPFLOOR_PLENUM:Zone Air Temperature [C](TimeStep)	Whole Building:Facility Total HVAC Electric Demand Power [W](TimeStep)	T0	hour E (MWh)	mean T0	Prev Hour T	Pop-weighted T	fitted T		prev indoor T	outdoor T0	energy input (MW)
08/01 00:05:00	18.475	0	23.2633	23.594	23.6665	23.9585	24.4909	24.538	23.4145	23.1804	23.3379	23.4519	23.5079	23.2363	23.4219	23.587	23.6721	23.4388	23.6017	23.6748	23.8542	281255	12.475				23.5987			0.99764	0.00548329	-0.152597	0	#N/A	#N/A
08/01 00:10:00	18.65	0	23.2583	23.5882	23.6598	23.9441	24.4878	24.5344	23.4099	23.1751	23.3335	23.4458	23.5017	23.2286	23.4151	23.5786	23.6593	23.4247	23.5881	23.6597	23.8315	285079	12.65				23.5918			0.000271472	0.000331349	0.0230952	#N/A	#N/A	#N/A
08/01 00:15:00	18.825	0	23.2534	23.5824	23.6531	23.9297	24.4853	24.5314	23.4067	23.1704	23.3306	23.4411	23.4968	23.2223	23.4096	23.5715	23.6478	23.4122	23.576	23.6459	23.8122	287922	12.825				23.5854			0.999938	0.186321	#N/A	#N/A	#N/A	#N/A
08/01 00:20:00	19	0	23.2484	23.5766	23.6464	23.9153	24.4832	24.5288	23.4043	23.167	23.3285	23.4377	23.4929	23.2168	23.4051	23.5652	23.6372	23.4006	23.5647	23.6326	23.7952	291896	13				23.5793			4.81918e+07	8913	#N/A	#N/A	#N/A	#N/A
08/01 00:25:00	19.175	0	23.2434	23.5708	23.6398	23.901	24.4814	24.5266	23.4027	23.1643	23.3271	23.4349	23.4896	23.212	23.4012	23.5594	23.6272	23.3894	23.5541	23.6198	23.7797	296452	13.175				23.5734			5.01899e+06	309.419	#N/A	#N/A	#N/A	#N/A
08/01 00:30:00	19.35	0	23.2385	23.5651	23.6333	23.8867	24.4798	24.5245	23.4015	23.1622	23.326	23.4322	23.4868	23.2077	23.3979	23.5541	23.6178	23.3788	23.544	23.6077	23.7655	301365	13.35				23.5677			#N/A	#N/A	#N/A	#N/A	#N/A	#N/A
08/01 00:35:00	19.525	0	23.2335	23.5595	23.6268	23.8726	24.4784	24.5226	23.4007	23.1604	23.3256	23.43	23.4844	23.2038	23.3949	23.5492	23.6088	23.3686	23.5344	23.596	23.7525	306537	13.525				23.5622
08/01 00:40:00	19.7	0	23.2286	23.5538	23.6203	23.8585	24.4771	24.5208	23.4002	23.1592	23.3248	23.4279	23.4823	23.2003	23.3927	23.5447	23.6002	23.3588	23.5258	23.5847	23.7405	311923	13.7				23.5569
08/01 00:45:00	19.875	0	23.2237	23.5483	23.6139	23.8445	24.4759	24.5191	23.4007	23.1582	23.3245	23.4261	23.4803	23.197	23.3907	23.5404	23.5913	23.3494	23.5174	23.5737	23.7295	317500	13.875				23.5516
08/01 00:50:00	20.05	0	23.2188	23.5428	23.6076	23.8307	24.4748	24.5175	23.4012	23.1575	23.3249	23.4247	23.4786	23.1941	23.3889	23.5365	23.5828	23.3402	23.5092	23.5631	23.7195	323257	14.05				23.5465
08/01 00:55:00	20.225	0	23.214	23.5373	23.6013	23.8169	24.4737	24.516	23.4018	23.1571	23.3254	23.4234	23.4772	23.1914	23.3875	23.5327	23.5748	23.3314	23.5012	23.5527	23.7103	329185	14.225				23.5415
08/01 01:00:00	20.4	0	23.2092	23.5319	23.595	23.8032	24.4728	24.5145	23.4026	23.1569	23.3262	23.422	23.476	23.1888	23.3862	23.5297	23.5671	23.3227	23.4935	23.5433	23.7022	335284	14.4				23.5366
08/01 01:05:00	20.325	0	23.2044	23.5265	23.5888	23.7896	24.4705	24.5118	23.398	23.1514	23.3217	23.4159	23.4696	23.1812	23.3796	23.5208	23.5542	23.3089	23.4804	23.5278	23.6794	339422	14.325	0.305638	13.4375	23.5987	23.5301	23.57
08/01 01:10:00	20.25	0	23.1996	23.5212	23.5826	23.7761	24.4674	24.5082	23.391	23.1436	23.3147	23.4072	23.4608	23.1712	23.3705	23.5097	23.5389	23.2927	23.4648	23.5101	23.6498	341270	14.25	0.310485	13.5917	23.5918	23.5229	23.5633
08/01 01:15:00	20.175	0	23.1948	23.5159	23.5765	23.7626	24.4636	24.5039	23.3823	23.1346	23.3065	23.3974	23.4513	23.16	23.3601	23.4974	23.5231	23.2751	23.4478	23.4913	23.6168	342045	14.175	0.315168	13.725	23.5854	23.5154	23.5569
08/01 01:20:00	20.1	0	23.1901	23.5106	23.5704	23.749	24.4594	24.4993	23.373	23.1249	23.2982	23.3868	23.4407	23.1482	23.3484	23.4845	23.506	23.2569	23.4291	23.4717	23.5819	342252	14.1	0.319678	13.8375	23.5793	23.5076	23.5508
08/01 01:25:00	20.025	0	23.1854	23.5053	23.5643	23.7354	24.4549	24.4943	23.3633	23.1148	23.2891	23.3758	23.4295	23.1359	23.3365	23.4712	23.4883	23.2381	23.4103	23.4517	23.5461	342135	14.025	0.323874	13.9292	23.5734	23.4997	23.5448
08/01 01:30:00	19.95	0	23.1807	23.5	23.5582	23.7216	24.4502	24.4891	23.3533	23.1044	23.2793	23.3641	23.418	23.1233	23.3244	23.458	23.47	23.2188	23.3913	23.4321	23.5096	341818	13.95	0.327681	14	23.5677	23.4917	23.5389
08/01 01:35:00	19.875	0	23.176	23.4947	23.5521	23.7077	24.4453	24.4838	23.3431	23.0944	23.2694	23.3524	23.4062	23.1101	23.3122	23.4444	23.4513	23.1987	23.372	23.4117	23.4729	341372	13.875	0.331052	14.05	23.5622	23.4836	23.5331
08/01 01:40:00	19.8	0	23.1714	23.4894	23.5459	23.6937	24.4403	24.4783	23.3327	23.0838	23.2592	23.3404	23.3941	23.0969	23.2997	23.4305	23.4323	23.1786	23.3525	23.3909	23.436	340839	13.8	0.333955	14.0792	23.5569	23.4754	23.5275
08/01 01:45:00	19.725	0	23.1667	23.4841	23.5398	23.6795	24.4351	24.4727	23.3222	23.0729	23.2484	23.3284	23.382	23.0837	23.2876	23.4164	23.4131	23.1584	23.3335	23.3699	23.399	340244	13.725	0.336365	14.0875	23.5516	23.4673	23.5219
08/01 01:50:00	19.65	0	23.1621	23.4787	23.5337	23.6653	24.4299	24.4671	23.3122	23.0619	23.2377	23.3162	23.3693	23.0704	23.2751	23.4022	23.3931	23.1381	23.3139	23.3486	23.3621	339604	13.65	0.33826	14.075	23.5465	23.4591	23.5165
08/01 01:55:00	19.575	0	23.1575	23.4734	23.5275	23.651	24.4247	24.4614	23.3016	23.0507	23.2269	23.304	23.3567	23.0571	23.2624	23.3878	23.3732	23.1177	23.294	23.3272	23.3252	338929	13.575	0.339622	14.0417	23.5415	23.4508	23.5111
08/01 02:00:00	19.5	0	23.1529	23.468	23.5214	23.6366	24.4193	24.4556	23.2908	23.0392	23.2161	23.2917	23.3441	23.0439	23.2497	23.3734	23.3533	23.0976	23.2739	23.3056	23.2885	338227	13.5	0.340434	13.9875	23.5366	23.4425	23.5058		predict mean T for an hour
08/01 02:05:00	19.4333	0	23.1483	23.4627	23.5152	23.6221	24.414	24.4499	23.2801	23.0278	23.2054	23.2795	23.3316	23.0307	23.2369	23.359	23.3334	23.0774	23.2539	23.284	23.2525	337353	13.4333	0.34068	13.9125	23.5301	23.4342	23.4989		based on
08/01 02:10:00	19.3667	0	23.1438	23.4573	23.5091	23.6076	24.4087	24.4441	23.2693	23.0164	23.1947	23.2672	23.3191	23.0174	23.2242	23.3447	23.3136	23.057	23.2337	23.2624	23.217	336298	13.3667	0.340507	13.8382	23.5229	23.426	23.4913		mean T previous hour?
08/01 02:15:00	19.3	0	23.1392	23.4519	23.5029	23.593	24.4033	24.4383	23.2585	23.0051	23.184	23.255	23.3066	23.0041	23.2115	23.3303	23.2937	23.0365	23.2135	23.2407	23.1818	335158	13.3	0.340093	13.7646	23.5154	23.4177	23.4835		mean T0 previous hour? Current T0?
08/01 02:20:00	19.2333	0	23.1347	23.4465	23.4968	23.5784	24.3979	24.4325	23.2477	22.9938	23.1733	23.2427	23.2941	22.9908	23.1987	23.3159	23.2737	23.0159	23.1933	23.219	23.1471	333974	13.2333	0.339519	13.6917	23.5076	23.4094	23.4754
08/01 02:25:00	19.1667	0	23.1302	23.4411	23.4906	23.5638	24.3925	24.4267	23.2368	22.9825	23.1626	23.2304	23.2815	22.9774	23.186	23.3015	23.2537	22.9953	23.173	23.1972	23.1126	332765	13.1667	0.338829	13.6194	23.4997	23.4011	23.4672		set T for one hour block
08/01 02:30:00	19.1	0	23.1256	23.4357	23.4844	23.5491	24.3871	24.4208	23.2259	22.9712	23.1518	23.2181	23.269	22.964	23.1732	23.287	23.2337	22.9746	23.1526	23.1754	23.0785	331540	13.1	0.338048	13.5479	23.4917	23.3928	23.4589		that will immediatey change T
08/01 02:35:00	19.0333	0	23.1212	23.4303	23.4783	23.5345	24.3817	24.415	23.215	22.9598	23.141	23.2058	23.2563	22.9506	23.1603	23.2725	23.2136	22.9539	23.1323	23.1535	23.0447	330305	13.0333	0.337192	13.4771	23.4836	23.3845	23.4506		how much energy will be used in that hour?
08/01 02:40:00	18.9667	0	23.1167	23.4249	23.4721	23.5198	24.3762	24.4091	23.204	22.9485	23.1302	23.1934	23.2437	22.9371	23.1475	23.258	23.1935	22.9331	23.1118	23.1316	23.0112	329063	12.9667	0.33627	13.4069	23.4754	23.3762	23.4423		based n T setting for preious block
08/01 02:45:00	18.9	0	23.1122	23.4195	23.466	23.5051	24.3708	24.4032	23.193	22.9371	23.1194	23.181	23.2311	22.9237	23.1346	23.2435	23.1734	22.9124	23.0914	23.1097	22.9781	327818	12.9	0.335288	13.3375	23.4673	23.3679	23.4339
08/01 02:50:00	18.8333	0	23.1077	23.4141	23.4598	23.4904	24.3653	24.3973	23.182	22.9257	23.1086	23.1687	23.2183	22.9102	23.1218	23.229	23.1532	22.8916	23.071	23.0878	22.9453	326569	12.8333	0.334253	13.2687	23.4591	23.3595	23.4255
08/01 02:55:00	18.7667	0	23.1033	23.4087	23.4536	23.4757	24.3598	24.3913	23.171	22.9144	23.0978	23.1563	23.2056	22.8968	23.1089	23.2144	23.133	22.8708	23.0505	23.0659	22.9128	325319	12.7667	0.333167	13.2007	23.4508	23.3512	23.417
08/01 03:00:00	18.7	0	23.0989	23.4033	23.4475	23.461	24.3543	24.3854	23.16	22.903	23.087	23.1439	23.1928	22.8833	23.096	23.1999	23.1128	22.85	23.03	23.044	22.8807	324067	12.7	0.332032	13.1333	23.4425	23.3429	23.4085
08/01 03:05:00	18.625	0	23.0944	23.3979	23.4413	23.4464	24.3487	24.3794	23.1483	22.8912	23.0755	23.1309	23.1795	22.8692	23.0825	23.1847	23.092	22.8284	23.0089	23.0215	22.8483	321425	12.625	0.330852	13.0667	23.4342	23.3344	23.4001
08/01 03:10:00	18.55	0	23.09	23.3925	23.4352	23.4317	24.3431	24.3733	23.1363	22.879	23.0636	23.1176	23.1659	22.8548	23.0687	23.1693	23.0709	22.8067	22.9876	22.9987	22.816	317304	12.55	0.329525	12.9993	23.426	23.3258	23.3917
08/01 03:15:00	18.475	0	23.0856	23.3871	23.4291	23.417	24.3374	24.3672	23.124	22.8665	23.0515	23.1039	23.152	22.8402	23.0546	23.1537	23.0496	22.7848	22.966	22.9758	22.7839	312596	12.475	0.327942	12.9312	23.4177	23.3171	23.3833
08/01 03:20:00	18.4	0	23.0812	23.3817	23.4229	23.4023	24.3317	24.361	23.1115	22.8538	23.0392	23.0901	23.138	22.8255	23.0405	23.1379	23.0281	22.7628	22.9443	22.9528	22.7519	307662	12.4	0.326062	12.8625	23.4094	23.3084	23.3749
08/01 03:25:00	18.325	0	23.0769	23.3763	23.4168	23.3876	24.3259	24.3548	23.0989	22.841	23.0267	23.0762	23.1239	22.8107	23.0262	23.122	23.0066	22.7407	22.9226	22.9296	22.72	302674	12.325	0.323869	12.7931	23.4011	23.2996	23.3666
08/01 03:30:00	18.25	0	23.0725	23.3709	23.4106	23.3729	24.3201	24.3485	23.0862	22.828	23.0142	23.0622	23.1097	22.7959	23.0119	23.1061	22.9849	22.7186	22.9007	22.9064	22.6884	297716	12.25	0.321362	12.7229	23.3928	23.2909	23.3583
08/01 03:35:00	18.175	0	23.0681	23.3655	23.4045	23.3582	24.3142	24.3422	23.0734	22.815	23.0015	23.0481	23.0954	22.7809	22.9974	23.0901	22.9632	22.6964	22.8788	22.8831	22.657	291635	12.175	0.318543	12.6521	23.3845	23.2821	23.3501
08/01 03:40:00	18.1	0	23.0638	23.3601	23.3983	23.3435	24.3083	24.3359	23.0605	22.8018	22.9888	23.0339	23.081	22.7659	22.9829	23.074	22.9414	22.6741	22.8568	22.8598	22.6258	284373	12.1	0.315321	12.5806	23.3762	23.2733	23.3419
08/01 03:45:00	18.025	0	23.0595	23.3546	23.3921	23.3288	24.3024	24.3296	23.0476	22.7886	22.976	23.0197	23.0665	22.7509	22.9684	23.0578	22.9195	22.6518	22.8348	22.8364	22.5947	278216	12.025	0.311597	12.5083	23.3679	23.2644	23.3338
08/01 03:50:00	17.95	0	23.0551	23.3492	23.386	23.3141	24.2965	24.3232	23.0346	22.7754	22.9632	23.0054	23.052	22.7357	22.9538	23.0416	22.8976	22.6294	22.8127	22.8129	22.5638	272590	11.95	0.307463	12.4354	23.3595	23.2556	23.3257
08/01 03:55:00	17.875	0	23.0508	23.3438	23.3798	23.2994	24.2905	24.3168	23.0215	22.7621	22.9503	22.9911	23.0375	22.7206	22.9391	23.0254	22.8756	22.607	22.7905	22.7894	22.5331	267107	11.875	0.302965	12.3618	23.3512	23.2467	23.3177
08/01 04:00:00	17.8	0	23.0465	23.3383	23.3737	23.2847	24.2845	24.3104	23.0084	22.7488	22.9374	22.9767	23.0229	22.7054	22.9245	23.0091	22.8536	22.5845	22.7683	22.7659	22.5025	261693	11.8	0.298114	12.2875	23.3429	23.2378	23.3097
08/01 04:05:00	17.8	0	23.0422	23.3329	23.3675	23.2699	24.2789	24.3044	22.9972	22.7373	22.9263	22.9641	23.0101	22.692	22.9116	22.9947	22.8335	22.5639	22.7481	22.7443	22.4767	259741	11.8	0.292916	12.2125	23.3344	23.2295	23.3016
08/01 04:10:00	17.8	0	23.0379	23.3278	23.3617	23.2555	24.2736	24.2986	22.9865	22.7266	22.9161	22.9524	22.9982	22.6795	22.8997	22.981	22.8144	22.5442	22.7286	22.7234	22.4534	258125	11.8	0.287776	12.1438	23.3258	23.2216	23.2934
08/01 04:15:00	17.8	0	23.0337	23.3225	23.3557	23.241	24.2685	24.293	22.9764	22.7164	22.9069	22.9412	22.9868	22.6674	22.8881	22.9679	22.7956	22.5249	22.7095	22.703	22.4313	256712	11.8	0.282844	12.0813	23.3171	23.2138	23.2852
08/01 04:20:00	17.8	0	23.0294	23.3172	23.3496	23.2264	24.2635	24.2876	22.9666	22.7065	22.8976	22.9302	22.9756	22.6555	22.8769	22.955	22.7771	22.5059	22.6908	22.6829	22.4102	255436	11.8	0.278187	12.025	23.3084	23.2061	23.2769
08/01 04:25:00	17.8	0	23.0251	23.3118	23.3436	23.2119	24.2585	24.2822	22.9571	22.6967	22.8885	22.9195	22.9646	22.6439	22.8659	22.9422	22.7589	22.4872	22.6724	22.6631	22.3897	254253	11.8	0.273835	11.975	23.2996	23.1984	23.2685
08/01 04:30:00	17.8	0	23.0209	23.3065	23.3375	23.1974	24.2537	24.2769	22.9478	22.6869	22.8796	22.9089	22.9538	22.6325	22.855	22.9297	22.7408	22.4688	22.6542	22.6434	22.3697	253134	11.8	0.2698	11.9313	23.2909	23.1907	23.2602
08/01 04:35:00	17.8	0	23.0166	23.3011	23.3314	23.1829	24.2489	24.2716	22.9386	22.6773	22.8707	22.8989	22.9431	22.6212	22.8443	22.9172	22.7229	22.4506	22.6361	22.6237	22.35	252061	11.8	0.266085	11.8937	23.2821	23.1831	23.2518
08/01 04:40:00	17.8	0	23.0124	23.2957	23.3253	23.1685	24.2441	24.2664	22.9296	22.6679	22.862	22.8888	22.9324	22.6099	22.8337	22.9048	22.7051	22.4324	22.6182	22.6043	22.3308	251021	11.8	0.262787	11.8625	23.2733	23.1754	23.2433
08/01 04:45:00	17.8	0	23.0082	23.2904	23.3192	23.1541	24.2393	24.2611	22.9206	22.6586	22.853	22.8786	22.9219	22.5988	22.8232	22.8926	22.6875	22.4143	22.6007	22.585	22.3118	250004	11.8	0.260007	11.8375	23.2644	23.1679	23.2348
08/01 04:50:00	17.8	8.56602	23.004	23.2851	23.3133	23.1399	24.2347	24.256	22.9192	22.6569	22.8516	22.8761	22.9186	22.5953	22.8201	22.8881	22.677	22.404	22.5905	22.5736	22.2934	249006	11.9713	0.257657	11.8187	23.2556	23.1627	23.2262
08/01 04:55:00	17.8	11.3601	22.9998	23.2799	23.3073	23.1257	24.2305	24.2514	22.92	22.6932	22.8611	22.8758	22.9175	22.6288	22.828	22.8857	22.6687	22.4306	22.5912	22.5642	22.2756	248021	12.0272	0.255691	11.8205	23.2467	23.1609	23.2176
08/01 05:00:00	17.8	13.8637	22.9956	23.2748	23.3015	23.1117	24.2271	24.2475	22.9209	22.7352	22.8729	22.8751	22.9167	22.6687	22.8379	22.8834	22.6607	22.4634	22.5939	22.555	22.259	247046	12.0773	0.254101	11.8332	23.2378	23.16	23.2091
08/01 05:05:00	17.8417	16.446	22.9914	23.2702	23.2962	23.0982	24.2245	24.2445	22.9233	22.7761	22.8847	22.8766	22.9174	22.7076	22.8478	22.8825	22.6544	22.4954	22.5966	22.5471	22.2458	248765	12.1706	0.25288	11.8563	23.2295	23.1595	23.2011
08/01 05:10:00	17.8833	19.1075	22.9872	23.2657	23.291	23.0849	24.2226	24.2421	22.9269	22.8179	22.8965	22.8791	22.9192	22.7473	22.8577	22.8828	22.6492	22.5281	22.5994	22.5404	22.2345	250713	12.2655	0.251965	11.8872	23.2216	23.1593	23.1936
08/01 05:15:00	17.925	21.8487	22.983	23.2616	23.2861	23.0719	24.221	24.24	22.9311	22.8614	22.9084	22.8824	22.922	22.7886	22.8677	22.8839	22.6451	22.5627	22.6023	22.5346	22.2244	252822	12.362	0.251348	11.926	23.2138	23.1596	23.1861
08/01 05:20:00	17.9667	24.6699	22.9789	23.2578	23.2816	23.0593	24.2197	24.2383	22.9362	22.9054	22.9208	22.8865	22.9256	22.8306	22.8779	22.8858	22.6418	22.5979	22.6055	22.5297	22.2153	255056	12.4601	0.251024	11.9728	23.2061	23.1603	23.1787
08/01 05:25:00	18.0083	27.5714	22.9747	23.2541	23.2772	23.047	24.2187	24.2368	22.9421	22.9472	22.9323	22.8912	22.9299	22.8704	22.8874	22.8884	22.6393	22.631	22.6079	22.5254	22.2068	257392	12.5598	0.250992	12.0278	23.1984	23.161	23.1713
08/01 05:30:00	18.05	30.5534	22.9706	23.2506	23.273	23.0349	24.2179	24.2355	22.9486	22.9877	22.9429	22.8961	22.9348	22.9092	22.8962	22.8916	22.6375	22.6632	22.6099	22.522	22.1989	259731	12.6611	0.251253	12.0911	23.1907	23.1618	23.1639
08/01 05:35:00	18.0917	40.7436	22.9665	23.2473	23.2689	23.023	24.2173	24.2344	22.9602	23.0678	22.9611	22.9063	22.9448	22.9875	22.9127	22.8998	22.6407	22.7347	22.6195	22.5235	22.1916	262133	12.9065	0.251803	12.1629	23.1831	23.1665	23.1566
08/01 05:40:00	18.1333	51.4794	22.9624	23.2442	23.2651	23.0114	24.2174	24.2341	22.9767	23.1875	22.9879	22.9214	22.9598	23.1056	22.9381	22.913	22.6489	22.846	22.638	22.5299	22.1855	264593	13.1629	0.252642	12.2551	23.1754	23.1752	23.1494
08/01 05:45:00	18.175	62.762	22.9583	23.2417	23.2618	23.0004	24.2188	24.235	22.9969	23.337	23.0182	22.94	22.9785	23.2533	22.9675	22.9295	22.661	22.9872	22.6607	22.5396	22.1811	267033	13.4302	0.253773	12.3687	23.1679	23.187	23.1423
08/01 05:50:00	18.2167	74.592	22.9542	23.2398	23.2592	22.9902	24.2214	24.2372	23.0207	23.5103	23.0507	22.9611	23.0006	23.425	22.999	22.9488	22.6764	23.1526	22.6855	22.5525	22.1784	269568	13.7085	0.255192	12.5045	23.1627	23.2013	23.1376
08/01 05:55:00	18.2583	86.9695	22.9502	23.2385	23.2572	22.9806	24.2251	24.2405	23.0484	23.5292	23.095	22.9863	23.0269	23.4438	23.0422	22.9723	22.6961	23.1662	22.7221	22.5696	22.177	272169	13.9977	0.256906	12.6493	23.1609	23.209	23.1365
08/01 06:00:00	18.3	99.8942	22.9462	23.237	23.255	22.9709	24.2285	24.2435	23.0775	23.5152	23.1393	23.0138	23.0544	23.4295	23.0856	22.9982	22.7171	23.146	22.7589	22.589	22.1759	274826	14.2979	0.258918	12.8135	23.16	23.2148	23.1361
08/01 06:05:00	18.4417	113.365	22.9422	23.2348	23.2521	22.9607	24.2321	24.2466	23.1087	23.5272	23.1826	23.0446	23.0845	23.442	23.1284	23.0276	22.7408	23.152	22.7951	22.6122	22.1811	278961	14.709	0.261233	12.9986	23.1595	23.2222	23.1362
08/01 06:10:00	18.5833	127.381	22.9383	23.2335	23.25	22.9514	24.236	24.2501	23.1418	23.5579	23.2253	23.0779	23.1166	23.4736	23.1708	23.0597	22.7667	23.1773	22.8312	22.6381	22.1898	283276	15.1309	0.26375	13.2101	23.1593	23.2316	23.1368
08/01 06:15:00	18.725	141.939	22.9344	23.2314	23.2472	22.9415	24.2404	24.2541	23.1764	23.6016	23.2677	23.1129	23.1506	23.5187	23.213	23.0937	22.7945	23.2162	22.8671	22.666	22.201	285481	15.5638	0.266463	13.4489	23.1596	23.2415	23.138
08/01 06:20:00	18.8667	157.038	22.9305	23.229	23.2442	22.9314	24.2451	24.2584	23.2127	23.6538	23.3099	23.1496	23.1864	23.5726	23.2554	23.1296	22.8243	23.2643	22.9033	22.6958	22.2139	288470	16.0074	0.269185	13.7157	23.1603	23.252	23.1397
08/01 06:25:00	19.0083	172.674	22.9267	23.2265	23.2411	22.9215	24.2502	24.2632	23.2506	23.7124	23.3521	23.1877	23.224	23.6333	23.298	23.1671	22.8561	23.3192	22.9399	22.7275	22.2283	291950	16.4618	0.271969	14.0113	23.161	23.2632	23.1417
08/01 06:30:00	19.15	188.844	22.9229	23.2242	23.2382	22.9118	24.2558	24.2684	23.2902	23.7759	23.394	23.2273	23.2635	23.6992	23.3403	23.2063	22.8899	23.3797	22.9764	22.7609	22.2441	295687	16.9269	0.274849	14.3365	23.1618	23.275	23.1438
08/01 06:35:00	19.2917	198.367	22.9191	23.2221	23.2354	22.9025	24.2616	24.2739	23.33	23.8279	23.4336	23.2669	23.3034	23.7539	23.3813	23.2458	22.9243	23.4292	23.0116	22.7947	22.2611	299588	17.259	0.277845	14.692	23.1665	23.2863	23.15
08/01 06:40:00	19.4333	207.737	22.9154	23.2201	23.2329	22.8936	24.2676	24.2796	23.37	23.8709	23.4717	23.3064	23.3436	23.7999	23.4212	23.2853	22.9591	23.4701	23.0458	22.8288	22.279	303611	17.5881	0.280967	15.0547	23.1752	23.2971	23.1602
08/01 06:45:00	19.575	216.953	22.9117	23.2183	23.2306	22.885	24.2735	24.2853	23.4102	23.9088	23.5087	23.346	23.3844	23.8412	23.4603	23.3252	22.9947	23.5065	23.0794	22.8634	22.2977	307739	17.9141	0.284218	15.4234	23.187	23.3078	23.1735
08/01 06:50:00	19.7167	226.014	22.9081	23.2167	23.2284	22.8768	24.2793	24.2909	23.4507	23.943	23.5447	23.3858	23.4257	23.8791	23.4986	23.3656	23.0309	23.5396	23.1124	22.8986	22.3172	311964	18.2369	0.28761	15.7971	23.2013	23.3184	23.1893
08/01 06:55:00	19.8583	234.92	22.9045	23.215	23.2264	22.8688	24.2851	24.2965	23.4914	23.9743	23.5796	23.4257	23.4676	23.9146	23.5363	23.4065	23.0678	23.5705	23.145	22.9344	22.3373	316282	18.5567	0.291143	16.1745	23.209	23.329	23.1985
08/01 07:00:00	20	243.67	22.9009	23.2137	23.2246	22.8612	24.2908	24.3021	23.5327	24.0002	23.6137	23.4661	23.51	23.9483	23.5731	23.4478	23.1054	23.5997	23.1769	22.9709	22.3583	320693	18.8734	0.29482	16.5544	23.2148	23.3396	23.2059
08/01 07:05:00	20.1833	252.264	23.2402	23.613	23.6233	23.2588	24.3141	24.3267	23.9191	24.0008	23.9521	23.8736	23.9049	24.0004	23.9391	23.8622	23.536	23.9452	23.6015	23.3967	22.4747	328604	19.2286	0.298642	16.9357	23.2222	23.7159	23.2147
08/01 07:10:00	20.3667	260.702	23.645	23.9979	23.9977	23.726	24.3601	24.3749	23.9992	24.0011	24	23.998	23.9989	24.0011	23.9996	23.9977	23.9563	23.9997	23.9864	23.8278	22.6539	364444	19.5807	0.302779	17.3123	23.2316	23.9982	23.2255
08/01 07:15:00	20.55	268.983	23.9713	24.0002	24.0002	23.9965	24.4094	24.4267	24.0017	24.0018	24.0018	24.0016	24.0017	24.0018	24.0017	24.0016	24.0015	24.0018	24.0015	23.9976	22.8539	417617	19.9297	0.309543	17.6831	23.2415	24.0007	23.2364
08/01 07:20:00	20.7333	277.108	23.9997	24.0004	24.0004	24.0002	24.4419	24.4598	24.0019	24.0019	24.0019	24.0017	24.0018	24.0019	24.0019	24.0017	24.0016	24.0018	24.0017	24.0013	22.9972	422173	20.2755	0.320554	18.0469	23.252	24.0008	23.2472
08/01 07:25:00	20.9167	285.077	24.0001	24.0005	24.0005	24.0004	24.4677	24.4857	24.0019	24.0019	24.002	24.0018	24.0019	24.0019	24.0019	24.0018	24.0017	24.0018	24.0017	24.0015	23.1014	425759	20.6182	0.331696	18.4026	23.2632	24.0009	23.2586
08/01 07:30:00	21.1	292.89	24.0001	24.0006	24.0006	24.0005	24.4876	24.5053	24.002	24.0019	24.002	24.0019	24.002	24.0019	24.002	24.0019	24.0018	24.0018	24.0018	24.0016	23.1848	428487	20.9578	0.342847	18.749	23.275	24.001	23.2706
08/01 07:35:00	21.2833	297.584	24.0001	24.0007	24.0007	24.0006	24.5027	24.52	24.0021	24.0019	24.0021	24.0019	24.002	24.0019	24.002	24.0019	24.0019	24.0019	24.0019	24.0017	23.2557	430618	21.235	0.353913	19.0849	23.2863	24.0011	23.2819
08/01 07:40:00	21.4667	302.445	24.0002	24.0008	24.0008	24.0007	24.5143	24.5312	24.0021	24.0019	24.0021	24.002	24.0021	24.0019	24.0021	24.0019	24.002	24.0019	24.0019	24.0018	23.3189	432330	21.5156	0.364833	19.4162	23.2971	24.0012	23.2929
08/01 07:45:00	21.65	307.466	24.0002	24.0009	24.0009	24.0008	24.5231	24.5395	24.0021	24.002	24.0021	24.002	24.0021	24.002	24.0021	24.002	24.002	24.002	24.002	24.0019	23.3769	433770	21.7993	0.375559	19.7435	23.3078	24.0013	23.3037
08/01 07:50:00	21.8333	312.645	24.0003	24.001	24.001	24.0009	24.5301	24.5459	24.0021	24.002	24.0021	24.002	24.0021	24.002	24.0021	24.002	24.0021	24.002	24.002	24.0019	23.4309	434976	22.0862	0.386062	20.0673	23.3184	24.0013	23.3145
08/01 07:55:00	22.0167	317.976	24.0003	24.0011	24.0011	24.001	24.5357	24.5511	24.0021	24.002	24.0021	24.002	24.0021	24.002	24.0021	24.002	24.0021	24.002	24.002	24.0019	23.4815	436004	22.3762	0.396313	20.3881	23.329	24.0014	23.3253
08/01 08:00:00	22.2	323.455	24.0003	24.0012	24.0012	24.0011	24.5403	24.5552	24.0021	24.002	24.0021	24.002	24.0021	24.002	24.0021	24.002	24.0021	24.002	24.0021	24.002	23.5294	436899	22.6691	0.40629	20.7063	23.3396	24.0015	23.3361
08/01 08:05:00	22.3417	329.076	24.0004	24.0013	24.0013	24.0012	24.5442	24.5587	24.0021	24.0019	24.0021	24.002	24.0021	24.0019	24.0021	24.002	24.0021	24.002	24.0021	24.002	23.5743	437784	22.9232	0.415973	21.0227	23.7159	24.0015	23.7117
08/01 08:10:00	22.4833	334.836	24.0004	24.0013	24.0014	24.0012	24.5474	24.5615	24.0021	24.0019	24.002	24.002	24.0021	24.0019	24.002	24.002	24.0021	24.002	24.0021	24.002	23.617	438693	23.18	0.425072	21.3305	23.9982	24.0016	23.9937
08/01 08:15:00	22.625	340.728	24.0004	24.0014	24.0014	24.0013	24.5503	24.5641	24.0021	24.0019	24.002	24.002	24.0021	24.0019	24.002	24.002	24.0021	24.002	24.0021	24.002	23.658	439593	23.4396	0.431259	21.6305	24.0007	24.0016	23.9968
08/01 08:20:00	22.7667	346.747	24.0004	24.0015	24.0015	24.0014	24.5528	24.5663	24.002	24.0019	24.002	24.0019	24.002	24.0019	24.002	24.0019	24.0021	24.0019	24.0021	24.002	23.6973	440476	23.7016	0.43309	21.923	24.0008	24.0016	23.9983
08/01 08:25:00	22.9083	352.887	24.0005	24.0015	24.0015	24.0014	24.5551	24.5683	24.002	24.0019	24.002	24.0019	24.002	24.0019	24.002	24.0019	24.0021	24.0019	24.002	24.002	23.7353	441338	23.9661	0.434616	22.2085	24.0009	24.0017	23.9997
08/01 08:30:00	23.05	359.144	24.0005	24.0016	24.0016	24.0015	24.5573	24.5701	24.002	24.0019	24.002	24.0019	24.002	24.0019	24.002	24.0019	24.0021	24.0019	24.002	24.002	23.7722	442177	24.2329	0.435914	22.4875	24.001	24.0017	24.0012
08/01 08:35:00	23.1917	385.962	24.0005	24.0016	24.0016	24.0015	24.5589	24.5715	24.002	24.0019	24.0019	24.0019	24.002	24.0019	24.0019	24.0019	24.0021	24.002	24.002	24.002	23.8084	443088	24.9109	0.437055	22.7604	24.0011	24.0017	24.0026
08/01 08:40:00	23.3333	413.689	24.0005	24.0016	24.0017	24.0016	24.5609	24.5733	24.0019	24.0019	24.0019	24.0019	24.0019	24.0019	24.0019	24.0019	24.002	24.002	24.002	24.002	23.8434	443810	25.6071	0.438094	23.0667	24.0012	24.0017	24.0042
08/01 08:45:00	23.475	442.297	24.0006	24.0017	24.0017	24.0016	24.5626	24.5748	24.0018	24.0019	24.0019	24.0019	24.0018	24.0019	24.0019	24.0019	24.0019	24.002	24.002	24.0019	23.8769	444497	26.3209	0.439051	23.4077	24.0013	24.0018	24.006
08/01 08:50:00	23.6167	471.756	24.0006	24.0017	24.0017	24.0017	24.5638	24.5757	24.0018	24.0019	24.0019	24.0019	24.0018	24.0019	24.0019	24.0019	24.0019	24.002	24.002	24.0019	23.9095	445229	27.0518	0.439945	23.7845	24.0013	24.0018	24.008
08/01 08:55:00	23.7583	502.037	24.0006	24.0017	24.0018	24.0017	24.5648	24.5765	24.0018	24.0019	24.0019	24.0019	24.0018	24.0019	24.0019	24.0019	24.0019	24.002	24.002	24.0019	23.9419	445907	27.7991	0.440799	24.1983	24.0014	24.0018	24.0102
08/01 09:00:00	23.9	533.109	24.0006	24.0018	24.0018	24.0018	24.566	24.5775	24.0018	24.0019	24.0019	24.0019	24.0018	24.0019	24.0019	24.0018	24.0019	24.002	24.002	24.0019	23.9739	446650	28.5622	0.441624	24.6502	24.0015	24.0018	24.0126
08/01 09:05:00	24.0417	564.939	24.0007	24.0018	24.0018	24.0018	24.5674	24.5787	24.0018	24.0019	24.0019	24.0018	24.0018	24.0019	24.0019	24.0018	24.002	24.002	24.002	24.002	24.0057	447744	29.3405	0.442437	25.1413	24.0015	24.0018	24.0152
08/01 09:10:00	24.1833	597.496	24.0007	24.0018	24.0018	24.0019	24.569	24.58	24.0018	24.0019	24.0019	24.0018	24.0018	24.0019	24.0019	24.0018	24.002	24.002	24.002	24.002	24.0371	449335	30.1333	0.443267	25.676	24.0016	24.0018	24.0181
08/01 09:15:00	24.325	630.746	24.0007	24.0018	24.0018	24.0019	24.5706	24.5814	24.0018	24.0019	24.0018	24.0018	24.0018	24.0018	24.0018	24.0018	24.002	24.002	24.002	24.0019	24.0682	451215	30.9399	0.444154	26.2555	24.0016	24.0018	24.0211
08/01 09:20:00	24.4667	664.655	24.0007	24.0018	24.0019	24.0019	24.5722	24.5829	24.0018	24.0018	24.0018	24.0018	24.0018	24.0018	24.0018	24.0018	24.002	24.0019	24.002	24.0019	24.0989	453331	31.7598	0.445122	26.8805	24.0016	24.0018	24.0245
08/01 09:25:00	24.6083	699.189	24.0007	24.0019	24.002	24.0019	24.5739	24.5844	24.002	24.002	24.0019	24.0019	24.002	24.002	24.002	24.0019	24.002	24.0019	24.002	24.0019	24.1292	455293	32.5921	0.446193	27.552	24.0017	24.002	24.028
08/01 09:30:00	24.75	734.312	24.0007	24.0019	24.002	24.0019	24.5756	24.5859	24.002	24.0019	24.0019	24.0019	24.002	24.0019	24.0019	24.0019	24.002	24.0019	24.0019	24.0019	24.1592	457413	33.4362	0.447356	28.2709	24.0017	24.002	24.0318
08/01 09:35:00	24.8917	745.322	24.0008	24.0019	24.002	24.002	24.5775	24.5876	24.0019	24.0019	24.0019	24.0019	24.0019	24.0019	24.0019	24.0019	24.002	24.0019	24.0019	24.0019	24.1889	459168	33.7981	0.448626	29.0378	24.0017	24.0019	24.0358
08/01 09:40:00	25.0333	756.246	24.0008	24.0019	24.002	24.002	24.5796	24.5895	24.0019	24.0018	24.0019	24.0019	24.0019	24.0018	24.0019	24.0019	24.0019	24.0018	24.0019	24.0019	24.2181	460872	34.1583	0.449966	29.7784	24.0017	24.0019	24.0397
08/01 09:45:00	25.175	767.075	24.0008	24.0019	24.002	24.002	24.5815	24.5912	24.0019	24.0018	24.0019	24.0018	24.0019	24.0018	24.0019	24.0018	24.0019	24.0018	24.0019	24.0019	24.2467	462668	34.5165	0.451388	30.491	24.0018	24.0019	24.0434
08/01 09:50:00	25.3167	777.799	24.0008	24.0019	24.002	24.002	24.5833	24.5928	24.0019	24.0017	24.0018	24.0018	24.0019	24.0017	24.0018	24.0018	24.0019	24.0018	24.0019	24.0018	24.2748	464563	34.8726	0.452902	31.174	24.0018	24.0019	24.047
08/01 09:55:00	25.4583	788.409	24.0008	24.0019	24.002	24.002	24.585	24.5943	24.0019	24.0017	24.0018	24.0018	24.0019	24.0017	24.0018	24.0018	24.0019	24.0017	24.0019	24.0018	24.3022	466536	35.2265	0.454513	31.8257	24.0018	24.0019	24.0503
08/01 10:00:00	25.6	798.898	24.0008	24.0019	24.002	24.002	24.5866	24.5957	24.0018	24.0017	24.0018	24.0018	24.0018	24.0017	24.0018	24.0018	24.0019	24.0017	24.0018	24.0018	24.3291	468562	35.578	0.456232	32.4447	24.0018	24.0019	24.0535
08/01 10:05:00	25.6917	809.255	24.0006	24.0017	24.0017	24.0017	24.5995	24.6086	24.0017	24.0015	24.0016	24.0016	24.0017	24.0015	24.0016	24.0016	24.0017	24.0015	24.0017	24.0016	24.3606	467554	35.8768	0.458058	33.0293	24.0018	24.0017	24.0564
08/01 10:10:00	25.7833	819.471	24.0007	24.0016	24.0017	24.0017	24.6045	24.6132	24.0016	24.0014	24.0015	24.0015	24.0016	24.0014	24.0016	24.0015	24.0016	24.0015	24.0016	24.0016	24.3861	468945	36.1728	0.459709	33.574	24.0018	24.0016	24.0591
08/01 10:15:00	25.875	829.539	24.0007	24.0016	24.0017	24.0017	24.6055	24.614	24.0016	24.0014	24.0015	24.0015	24.0016	24.0014	24.0015	24.0015	24.0016	24.0014	24.0016	24.0015	24.4077	470187	36.4658	0.461343	34.0773	24.0018	24.0016	24.0617
08/01 10:20:00	25.9667	839.449	24.0007	24.0016	24.0016	24.0017	24.6054	24.6136	24.0015	24.0014	24.0015	24.0015	24.0015	24.0014	24.0015	24.0015	24.0016	24.0014	24.0015	24.0015	24.427	471347	36.7557	0.462924	34.5378	24.0018	24.0016	24.064
08/01 10:25:00	26.0583	849.192	24.0007	24.0016	24.0016	24.0017	24.605	24.6131	24.0015	24.0014	24.0015	24.0015	24.0015	24.0014	24.0015	24.0015	24.0016	24.0014	24.0015	24.0015	24.4469	472539	37.0422	0.464426	34.9541	24.002	24.0016	24.0661
08/01 10:30:00	26.15	858.76	24.0007	24.0016	24.0016	24.0017	24.605	24.613	24.0015	24.0013	24.0015	24.0015	24.0015	24.0013	24.0015	24.0015	24.0015	24.0014	24.0015	24.0015	24.4679	473783	37.3252	0.465863	35.3249	24.002	24.0016	24.0679
08/01 10:35:00	26.2417	865.131	24.0007	24.0016	24.0016	24.0017	24.6052	24.6131	24.0015	24.0013	24.0015	24.0014	24.0015	24.0013	24.0015	24.0014	24.0015	24.0014	24.0015	24.0015	24.4899	475089	37.5443	0.467227	35.649	24.0019	24.0016	24.0695
08/01 10:40:00	26.3333	871.251	24.0007	24.0016	24.0016	24.0017	24.6057	24.6135	24.0015	24.0013	24.0015	24.0014	24.0015	24.0013	24.0015	24.0014	24.0015	24.0014	24.0015	24.0015	24.5129	476439	37.7584	0.468554	35.9612	24.0019	24.0016	24.071
08/01 10:45:00	26.425	877.117	24.0007	24.0016	24.0016	24.0017	24.6063	24.614	24.0015	24.0013	24.0015	24.0014	24.0015	24.0013	24.0014	24.0014	24.0015	24.0014	24.0015	24.0015	24.5368	477822	37.9673	0.469851	36.2612	24.0019	24.0016	24.0724
08/01 10:50:00	26.5167	882.726	24.0007	24.0016	24.0016	24.0017	24.607	24.6147	24.0015	24.0013	24.0014	24.0014	24.0015	24.0013	24.0014	24.0014	24.0015	24.0014	24.0015	24.0015	24.5617	479229	38.1712	0.471114	36.5488	24.0019	24.0016	24.0738
08/01 10:55:00	26.6083	888.074	24.0007	24.0016	24.0016	24.0017	24.6079	24.6155	24.0015	24.0013	24.0014	24.0014	24.0014	24.0013	24.0014	24.0014	24.0015	24.0013	24.0015	24.0015	24.5874	480652	38.3698	0.472336	36.8237	24.0019	24.0016	24.0751
08/01 11:00:00	26.7	893.159	24.0007	24.0016	24.0016	24.0017	24.6088	24.6164	24.0015	24.0013	24.0014	24.0014	24.0014	24.0013	24.0014	24.0014	24.0015	24.0013	24.0015	24.0015	24.6141	482085	38.5632	0.473512	37.0856	24.0019	24.0016	24.0764
08/01 11:05:00	26.7417	897.976	24.0003	24.0011	24.0012	24.0012	24.634	24.6416	24.0012	24.001	24.0011	24.0011	24.0012	24.0011	24.0012	24.0011	24.0012	24.0011	24.0012	24.0012	24.6655	478668	38.7012	0.474639	37.3344	24.0017	24.0012	24.0773
08/01 11:10:00	26.7833	902.524	23.9881	24.0011	24.0011	24.0011	24.6441	24.651	24.0011	24.0009	24.0011	24.001	24.0011	24.001	24.0011	24.0011	24.0011	24.001	24.0011	24.0011	24.7023	479208	38.8338	0.475565	37.5697	24.0016	24.0011	24.0784
08/01 11:15:00	26.825	906.8	23.9776	24.001	24.0011	24.0011	24.6459	24.6522	24.001	24.0009	24.001	24.001	24.001	24.0009	24.001	24.001	24.0011	24.0009	24.0011	24.0011	24.7313	479010	38.961	0.476421	37.7915	24.0016	24.0011	24.0795
08/01 11:20:00	26.8667	910.8	23.9689	24.001	24.0011	24.0011	24.6448	24.6508	24.001	24.0009	24.001	24.001	24.001	24.0009	24.001	24.001	24.001	24.0009	24.001	24.001	24.7581	478578	39.0827	0.477156	37.9994	24.0016	24.001	24.0805
08/01 11:25:00	26.9083	914.523	23.9618	24.001	24.0011	24.0011	24.6431	24.6488	24.001	24.0008	24.001	24.001	24.001	24.0008	24.001	24.0009	24.001	24.0009	24.001	24.001	24.7851	478331	39.1988	0.477758	38.1934	24.0016	24.001	24.0815
08/01 11:30:00	26.95	917.966	23.9561	24.001	24.001	24.0011	24.6416	24.6472	24.0009	24.0008	24.0009	24.0009	24.0009	24.0008	24.0009	24.0009	24.001	24.0009	24.001	24.001	24.8131	478224	39.3093	0.478241	38.3731	24.0016	24.001	24.0824
08/01 11:35:00	26.9917	915.308	23.9515	24.001	24.001	24.0011	24.6405	24.6461	24.0009	24.0008	24.0009	24.0009	24.0009	24.0008	24.0009	24.0009	24.001	24.0008	24.001	24.001	24.8425	478200	39.2978	0.478611	38.5384	24.0016	24.001	24.0832
08/01 11:40:00	27.0333	912.346	23.9478	24.001	24.001	24.0011	24.6398	24.6455	24.0009	24.0008	24.0009	24.0009	24.0009	24.0008	24.0009	24.0009	24.0009	24.0008	24.0009	24.0009	24.8732	478231	39.2802	0.47887	38.6845	24.0016	24.001	24.084
08/01 11:45:00	27.075	909.084	23.9449	24.001	24.001	24.0011	24.6388	24.6445	24.0009	24.0009	24.0009	24.0009	24.0009	24.0009	24.0009	24.0009	24.0009	24.0009	24.0009	24.0009	24.904	478442	39.2567	0.47902	38.8114	24.0016	24.001	24.0847
08/01 11:50:00	27.1167	905.53	23.9426	24.001	24.001	24.0011	24.6385	24.6443	24.0009	24.0009	24.0009	24.0009	24.0009	24.0009	24.0009	24.0009	24.0009	24.0009	24.0009	24.0009	24.9364	478655	39.2273	0.479071	38.9188	24.0016	24.001	24.0852
08/01 11:55:00	27.1583	901.687	23.9408	24.001	24.001	24.0011	24.639	24.6448	24.0009	24.0009	24.0009	24.0009	24.0009	24.0009	24.0009	24.0009	24.0009	24.0009	24.0009	24.0009	24.9704	478828	39.1921	0.479024	39.0068	24.0016	24.001	24.0857
08/01 12:00:00	27.2	897.563	23.9395	24.001	24.001	24.0011	24.6397	24.6456	24.0009	24.0009	24.0009	24.0009	24.0009	24.0009	24.0009	24.0009	24.0009	24.0009	24.0009	24.0009	25.0052	479020	39.1513	0.478872	39.0753	24.0016	24.001	24.0861
08/01 12:05:00	27.2	893.163	23.9997	24.0015	24.0015	24.0016	24.6152	24.6211	24.0011	24.0012	24.0011	24.0011	24.0011	24.0011	24.0011	24.0011	24.0012	24.0012	24.0012	24.0012	25.0001	483479	39.0633	0.478616	39.1243	24.0012	24.0014	24.086
08/01 12:10:00	27.2	888.492	24.0007	24.0016	24.0016	24.0017	24.6065	24.6131	24.0012	24.0012	24.0012	24.0012	24.0012	24.0012	24.0012	24.0012	24.0012	24.0013	24.0013	24.0013	25.0194	483933	38.9698	0.479017	39.1545	24.0011	24.0014	24.086
08/01 12:15:00	27.2	883.558	24.0007	24.0016	24.0016	24.0017	24.6073	24.6146	24.0013	24.0013	24.0013	24.0012	24.0012	24.0013	24.0013	24.0012	24.0013	24.0013	24.0013	24.0012	25.0524	484575	38.8712	0.479411	39.1659	24.0011	24.0015	24.086
08/01 12:20:00	27.2	878.366	24.0007	24.0016	24.0016	24.0017	24.6104	24.618	24.0013	24.0013	24.0013	24.0012	24.0013	24.0013	24.0013	24.0012	24.0013	24.0013	24.0013	24.0012	25.0889	485451	38.7673	0.479875	39.1584	24.001	24.0015	24.0859
08/01 12:25:00	27.2	872.923	24.0007	24.0016	24.0016	24.0017	24.6135	24.6211	24.0013	24.0013	24.0013	24.0012	24.0013	24.0013	24.0013	24.0012	24.0014	24.0014	24.0014	24.0013	25.1255	486290	38.6585	0.480447	39.1321	24.001	24.0015	24.0856
08/01 12:30:00	27.2	867.236	24.0007	24.0017	24.0016	24.0018	24.6163	24.6238	24.0013	24.0014	24.0013	24.0013	24.0013	24.0013	24.0013	24.0013	24.0014	24.0014	24.0014	24.0013	25.1618	486991	38.5447	0.481111	39.0871	24.001	24.0015	24.0853
08/01 12:35:00	27.2	843.095	24.0007	24.0017	24.0016	24.0018	24.6188	24.6262	24.0013	24.0014	24.0014	24.0013	24.0013	24.0014	24.0013	24.0013	24.0014	24.0014	24.0014	24.0014	25.1981	487539	38.0619	0.481841	39.0233	24.001	24.0015	24.0848
08/01 12:40:00	27.2	818.859	24.0007	24.0017	24.0016	24.0018	24.621	24.6283	24.0013	24.0014	24.0014	24.0013	24.0013	24.0014	24.0014	24.0013	24.0014	24.0014	24.0014	24.0014	25.2342	487985	37.5772	0.48262	38.9203	24.001	24.0016	24.0841
08/01 12:45:00	27.2	794.56	24.0007	24.0017	24.0017	24.0018	24.623	24.6301	24.0013	24.0014	24.0014	24.0014	24.0013	24.0014	24.0014	24.0014	24.0014	24.0014	24.0014	24.0014	25.2699	488354	37.0912	0.483432	38.7784	24.001	24.0016	24.0832
08/01 12:50:00	27.2	770.229	24.0007	24.0017	24.0017	24.0018	24.6248	24.6318	24.0013	24.0014	24.0014	24.0014	24.0013	24.0014	24.0014	24.0014	24.0014	24.0014	24.0014	24.0014	25.3054	488649	36.6046	0.484258	38.598	24.001	24.0016	24.0821
08/01 12:55:00	27.2	745.898	24.0007	24.0017	24.0017	24.0018	24.6264	24.6333	24.0013	24.0014	24.0014	24.0014	24.0013	24.0014	24.0014	24.0014	24.0014	24.0014	24.0014	24.0014	25.3404	488904	36.118	0.485091	38.3794	24.001	24.0016	24.0808
08/01 13:00:00	27.2	721.6	24.0007	24.0017	24.0017	24.0018	24.6279	24.6346	24.0013	24.0014	24.0014	24.0014	24.0013	24.0014	24.0014	24.0014	24.0014	24.0014	24.0014	24.0015	25.3748	489126	35.632	0.485931	38.1232	24.001	24.0016	24.0792
08/01 13:05:00	27.25	697.366	24.001	24.002	24.0019	24.002	24.6171	24.6237	24.0015	24.0015	24.0015	24.0016	24.0015	24.0015	24.0015	24.0015	24.0015	24.0016	24.0016	24.0016	25.3827	492740	35.1973	0.486773	37.83	24.0014	24.0018	24.0779
08/01 13:10:00	27.3	673.227	24.001	24.002	24.002	24.0021	24.6149	24.6217	24.0015	24.0016	24.0016	24.0016	24.0015	24.0016	24.0016	24.0016	24.0016	24.0017	24.0017	24.0017	25.4081	493667	34.7645	0.487545	37.5078	24.0014	24.0018	24.0761
08/01 13:15:00	27.35	649.216	24.001	24.002	24.002	24.0021	24.6167	24.6237	24.0016	24.0016	24.0016	24.0017	24.0016	24.0016	24.0016	24.0016	24.0016	24.0017	24.0017	24.0017	25.4398	494556	34.3343	0.488356	37.1574	24.0015	24.0018	24.0741
08/01 13:20:00	27.4	625.363	24.001	24.002	24.0019	24.0021	24.6196	24.6265	24.0016	24.0017	24.0016	24.0017	24.0016	24.0016	24.0016	24.0017	24.0016	24.0017	24.0017	24.0017	25.4728	495375	33.9073	0.489188	36.7793	24.0015	24.0018	24.0719
08/01 13:25:00	27.45	601.699	24.001	24.002	24.0019	24.0021	24.6224	24.6292	24.0016	24.0017	24.0017	24.0017	24.0016	24.0016	24.0016	24.0017	24.0016	24.0017	24.0017	24.0017	25.5054	496077	33.484	0.490015	36.3743	24.0015	24.0018	24.0696
08/01 13:30:00	27.5	578.256	24.001	24.002	24.0019	24.0021	24.625	24.6317	24.0016	24.0017	24.0017	24.0017	24.0016	24.0017	24.0017	24.0017	24.0016	24.0017	24.0017	24.0017	25.5371	496648	33.0651	0.49083	35.9431	24.0015	24.0018	24.0671
08/01 13:35:00	27.55	583.127	24.001	24.002	24.0019	24.0021	24.6272	24.6337	24.0016	24.0017	24.0017	24.0017	24.0016	24.0017	24.0017	24.0017	24.0016	24.0017	24.0017	24.0017	25.5679	497170	33.2125	0.491635	35.4864	24.0015	24.0018	24.0645
08/01 13:40:00	27.6	587.661	24.001	24.002	24.0019	24.002	24.6291	24.6355	24.0016	24.0017	24.0017	24.0017	24.0016	24.0017	24.0017	24.0017	24.0017	24.0017	24.0017	24.0017	25.5974	497637	33.3532	0.492438	35.0823	24.0016	24.0018	24.0621
08/01 13:45:00	27.65	591.843	24.001	24.002	24.0019	24.002	24.6308	24.637	24.0016	24.0017	24.0017	24.0017	24.0016	24.0016	24.0017	24.0017	24.0017	24.0017	24.0017	24.0018	25.6263	498058	33.4869	0.493242	34.7303	24.0016	24.0018	24.0601
08/01 13:50:00	27.7	595.66	24.001	24.0019	24.0019	24.002	24.6324	24.6385	24.0016	24.0017	24.0017	24.0017	24.0016	24.0016	24.0017	24.0017	24.0017	24.0017	24.0017	24.0018	25.6541	498445	33.6132	0.494051	34.43	24.0016	24.0018	24.0583
08/01 13:55:00	27.75	599.1	24.001	24.0019	24.0019	24.002	24.634	24.64	24.0016	24.0017	24.0017	24.0017	24.0016	24.0016	24.0016	24.0017	24.0017	24.0017	24.0017	24.0018	25.6811	498811	33.732	0.494867	34.1807	24.0016	24.0018	24.0568
08/01 14:00:00	27.8	602.149	24.001	24.0019	24.0019	24.002	24.6355	24.6414	24.0016	24.0017	24.0017	24.0017	24.0016	24.0016	24.0016	24.0017	24.0017	24.0017	24.0017	24.0018	25.7071	499156	33.843	0.495693	33.9819	24.0016	24.0018	24.0556
08/01 14:05:00	27.7083	604.796	24.001	24.0019	24.0019	24.002	24.637	24.6428	24.0016	24.0017	24.0017	24.0017	24.0016	24.0016	24.0016	24.0017	24.0017	24.0017	24.0017	24.0018	25.7307	498868	33.8043	0.496528	33.8328	24.0018	24.0018	24.0549
08/01 14:10:00	27.6167	607.028	24.001	24.0019	24.0019	24.002	24.6384	24.6441	24.0016	24.0017	24.0017	24.0017	24.0016	24.0016	24.0016	24.0017	24.0017	24.0017	24.0017	24.0018	25.7527	497914	33.7572	0.497039	33.7167	24.0018	24.0018	24.0542
08/01 14:15:00	27.525	608.834	24.001	24.0019	24.0019	24.002	24.6397	24.6453	24.0016	24.0016	24.0017	24.0017	24.0016	24.0016	24.0016	24.0017	24.0017	24.0017	24.0017	24.0018	25.7737	496581	33.7017	0.497393	33.6327	24.0018	24.0018	24.0537
08/01 14:20:00	27.4333	610.202	24.001	24.0019	24.0019	24.002	24.641	24.6466	24.0016	24.0016	24.0016	24.0017	24.0016	24.0016	24.0016	24.0017	24.0017	24.0017	24.0017	24.0018	25.7935	494991	33.6374	0.497562	33.58	24.0018	24.0018	24.0534
08/01 14:25:00	27.3417	611.122	24.001	24.0019	24.0019	24.002	24.6423	24.6478	24.0016	24.0016	24.0016	24.0017	24.0016	24.0016	24.0016	24.0017	24.0017	24.0017	24.0017	24.0017	25.8124	493232	33.5641	0.49753	33.5575	24.0018	24.0018	24.0533
08/01 14:30:00	27.25	611.582	24.001	24.0019	24.0019	24.0019	24.6436	24.649	24.0016	24.0016	24.0016	24.0017	24.0016	24.0016	24.0016	24.0017	24.0017	24.0017	24.0017	24.0017	25.8302	491362	33.4816	0.497293	33.5642	24.0018	24.0018	24.0534
08/01 14:35:00	27.1583	612.304	24.001	24.0019	24.0019	24.0019	24.6449	24.6502	24.0016	24.0016	24.0016	24.0017	24.0016	24.0016	24.0016	24.0017	24.0016	24.0016	24.0017	24.0017	25.847	489437	33.4044	0.496852	33.5989	24.0018	24.0018	24.0536
08/01 14:40:00	27.0667	612.604	24.001	24.0019	24.0018	24.0019	24.6461	24.6513	24.0016	24.0016	24.0016	24.0017	24.0016	24.0016	24.0016	24.0017	24.0016	24.0016	24.0016	24.0017	25.8626	487476	33.3187	0.496208	33.6149	24.0018	24.0018	24.0538
08/01 14:45:00	26.975	612.475	24.001	24.0019	24.0018	24.0019	24.6473	24.6524	24.0016	24.0016	24.0016	24.0017	24.0016	24.0016	24.0016	24.0017	24.0016	24.0016	24.0016	24.0017	25.8773	485490	33.2245	0.495361	33.612	24.0018	24.0018	24.0539
08/01 14:50:00	26.8833	611.91	24.001	24.0019	24.0018	24.0019	24.6485	24.6536	24.0016	24.0016	24.0016	24.0017	24.0016	24.0016	24.0016	24.0017	24.0016	24.0016	24.0016	24.0017	25.891	483490	33.1215	0.494314	33.5902	24.0018	24.0018	24.0539
08/01 14:55:00	26.7917	610.903	24.001	24.0019	24.0018	24.0019	24.6498	24.6548	24.0016	24.0016	24.0016	24.0017	24.0016	24.0016	24.0016	24.0016	24.0016	24.0016	24.0016	24.0017	25.9039	481482	33.0097	0.493067	33.5492	24.0018	24.0018	24.0539
08/01 15:00:00	26.7	609.446	24.001	24.0019	24.0018	24.0019	24.651	24.656	24.0016	24.0016	24.0016	24.0017	24.0016	24.0016	24.0016	24.0016	24.0016	24.0016	24.0016	24.0017	25.9158	479470	32.8889	0.491623	33.489	24.0018	24.0018	24.0538
08/01 15:05:00	26.7917	607.535	24.001	24.0019	24.0018	24.0019	24.6523	24.6571	24.0016	24.0016	24.0016	24.0016	24.0016	24.0016	24.0016	24.0016	24.0016	24.0016	24.0016	24.0017	25.9286	478293	32.9424	0.489983	33.4095	24.0018	24.0018	24.0536
08/01 15:10:00	26.8833	605.162	24.001	24.0019	24.0018	24.0019	24.6536	24.6584	24.0016	24.0016	24.0016	24.0016	24.0015	24.0016	24.0016	24.0016	24.0016	24.0016	24.0016	24.0016	25.941	477945	32.9866	0.488268	33.3377	24.0018	24.0018	24.0535
08/01 15:15:00	26.975	602.324	24.001	24.0019	24.0018	24.0019	24.655	24.6598	24.0016	24.0016	24.0016	24.0016	24.0015	24.0016	24.0016	24.0016	24.0016	24.0016	24.0016	24.0016	25.9534	478040	33.0215	0.486604	33.2735	24.0018	24.0018	24.0534
08/01 15:20:00	27.0667	599.016	24.001	24.0019	24.0018	24.0019	24.6565	24.6612	24.0016	24.0016	24.0016	24.0016	24.0015	24.0016	24.0016	24.0016	24.0016	24.0016	24.0016	24.0016	25.9651	478462	33.047	0.485059	33.2168	24.0018	24.0018	24.0533
08/01 15:25:00	27.1583	595.232	24.001	24.0019	24.0018	24.0019	24.658	24.6626	24.0016	24.0016	24.0016	24.0016	24.0015	24.0016	24.0016	24.0016	24.0016	24.0016	24.0016	24.0016	25.9763	479097	33.063	0.483682	33.1676	24.0018	24.0018	24.0532
08/01 15:30:00	27.25	590.968	24.001	24.0019	24.0019	24.0019	24.6595	24.6641	24.0015	24.0016	24.0016	24.0016	24.0015	24.0015	24.0016	24.0016	24.0016	24.0016	24.0016	24.0016	25.9867	479867	33.0694	0.482504	33.1258	24.0018	24.0018	24.0532
08/01 15:35:00	27.3417	575.132	24.001	24.0019	24.0019	24.0019	24.6611	24.6656	24.0015	24.0016	24.0016	24.0016	24.0015	24.0015	24.0016	24.0016	24.0016	24.0016	24.0016	24.0016	25.997	480668	32.8443	0.481546	33.0915	24.0018	24.0018	24.0531
08/01 15:40:00	27.4333	559.329	24.001	24.0019	24.0019	24.0019	24.6627	24.6671	24.0015	24.0016	24.0016	24.0016	24.0015	24.0015	24.0015	24.0016	24.0015	24.0016	24.0016	24.0016	26.0067	481492	32.6199	0.480815	33.0448	24.0018	24.0018	24.053
08/01 15:45:00	27.525	543.567	24.001	24.0019	24.0019	24.0019	24.6643	24.6686	24.0015	24.0016	24.0016	24.0016	24.0015	24.0015	24.0015	24.0015	24.0015	24.0016	24.0016	24.0016	26.016	482327	32.3963	0.480316	32.9866	24.0018	24.0018	24.0527
08/01 15:50:00	27.6167	527.856	24.001	24.0019	24.0019	24.0019	24.6654	24.6696	24.0016	24.0016	24.0016	24.0016	24.0016	24.0015	24.0015	24.0015	24.0016	24.0016	24.0016	24.0016	26.0227	483428	32.1738	0.480053	32.9175	24.0018	24.0018	24.0524
08/01 15:55:00	27.7083	512.203	24.001	24.0019	24.0019	24.0019	24.6666	24.6707	24.0016	24.0016	24.0016	24.0016	24.0016	24.0015	24.0015	24.0015	24.0016	24.0016	24.0016	24.0016	26.0288	484577	31.9524	0.480047	32.8386	24.0018	24.0018	24.0519
08/01 16:00:00	27.8	496.618	24.001	24.0019	24.0019	24.0019	24.6683	24.6723	24.0016	24.0016	24.0016	24.0016	24.0016	24.0015	24.0015	24.0015	24.0016	24.0016	24.0016	24.0016	26.0355	485564	31.7324	0.480305	32.7505	24.0018	24.0018	24.0514
08/01 16:05:00	27.75	481.108	24.001	24.0019	24.0019	24.0019	24.6699	24.6739	24.0016	24.0015	24.0016	24.0015	24.0016	24.0015	24.0015	24.0015	24.0016	24.0016	24.0016	24.0015	26.0405	485863	31.3722	0.480813	32.6541	24.0018	24.0018	24.0508
08/01 16:10:00	27.7	465.681	24.001	24.0019	24.0019	24.0019	24.6716	24.6755	24.0016	24.0015	24.0015	24.0015	24.0016	24.0015	24.0015	24.0015	24.0016	24.0015	24.0016	24.0015	26.0451	485369	31.0136	0.481444	32.5232	24.0018	24.0018	24.05
08/01 16:15:00	27.65	450.347	24.001	24.0019	24.0018	24.0019	24.6732	24.6771	24.0016	24.0015	24.0015	24.0015	24.0015	24.0015	24.0015	24.0015	24.0016	24.0015	24.0015	24.0015	26.0494	484412	30.6569	0.482063	32.3588	24.0018	24.0017	24.049
08/01 16:20:00	27.6	435.112	24.001	24.0019	24.0018	24.0018	24.6746	24.6784	24.0015	24.0015	24.0015	24.0015	24.0015	24.0015	24.0015	24.0015	24.0015	24.0015	24.0015	24.0015	26.0527	483175	30.3022	0.482594	32.1618	24.0018	24.0017	24.0478
08/01 16:25:00	27.55	419.984	24.001	24.0018	24.0018	24.0018	24.6758	24.6796	24.0015	24.0015	24.0015	24.0015	24.0015	24.0015	24.0015	24.0015	24.0015	24.0015	24.0015	24.0015	26.0554	481753	29.9497	0.482986	31.933	24.0018	24.0017	24.0465
08/01 16:30:00	27.5	404.972	24.001	24.0018	24.0018	24.0018	24.677	24.6807	24.0015	24.0015	24.0015	24.0015	24.0015	24.0015	24.0015	24.0015	24.0015	24.0015	24.0015	24.0015	26.0575	480189	29.5994	0.483208	31.6736	24.0018	24.0017	24.0451
08/01 16:35:00	27.45	387.155	24.001	24.0018	24.0018	24.0018	24.6781	24.6818	24.0015	24.0015	24.0015	24.0015	24.0015	24.0015	24.0015	24.0015	24.0015	24.0015	24.0015	24.0015	26.0593	478522	29.1931	0.483235	31.3844	24.0018	24.0017	24.0435
08/01 16:40:00	27.4	369.636	24.001	24.0018	24.0018	24.0018	24.6792	24.6828	24.0015	24.0015	24.0015	24.0015	24.0015	24.0015	24.0015	24.0014	24.0015	24.0015	24.0015	24.0015	26.0605	476813	28.7927	0.483056	31.0802	24.0018	24.0017	24.0418
08/01 16:45:00	27.35	352.422	24.001	24.0018	24.0018	24.0018	24.6802	24.6839	24.0015	24.0015	24.0015	24.0015	24.0015	24.0015	24.0015	24.0014	24.0015	24.0015	24.0015	24.0014	26.0613	475075	28.3984	0.482666	30.7612	24.0018	24.0017	24.0401
08/01 16:50:00	27.3	335.524	24.001	24.0018	24.0018	24.0018	24.6813	24.6849	24.0015	24.0015	24.0015	24.0014	24.0015	24.0015	24.0015	24.0014	24.0015	24.0015	24.0015	24.0014	26.0616	473314	28.0105	0.482062	30.4281	24.0018	24.0017	24.0384
08/01 16:55:00	27.25	318.948	24.001	24.0018	24.0017	24.0017	24.6824	24.6859	24.0015	24.0015	24.0015	24.0014	24.0015	24.0014	24.0015	24.0014	24.0015	24.0015	24.0015	24.0014	26.0617	471540	27.629	0.481219	30.0811	24.0018	24.0017	24.0366
08/01 17:00:00	27.2	302.704	24.001	24.0018	24.0017	24.0017	24.6834	24.687	24.0015	24.0015	24.0015	24.0014	24.0014	24.0014	24.0015	24.0014	24.0015	24.0015	24.0015	24.0014	26.0613	469756	27.2541	0.480132	29.7208	24.0018	24.0017	24.0348
08/01 17:05:00	27.1083	286.798	24.0005	24.0012	24.0012	24.0013	24.7184	24.7217	24.0011	24.0011	24.0011	24.0011	24.0011	24.0011	24.0011	24.0011	24.0011	24.0011	24.0011	24.0011	26.1598	458223	26.8443	0.478815	29.3477	24.0018	24.0012	24.033
08/01 17:10:00	27.0167	271.239	24.0005	24.0011	24.0011	24.0011	24.7309	24.7332	24.0009	24.0009	24.001	24.0008	24.0009	24.0009	24.001	24.0008	24.0009	24.0009	24.0009	24.0007	26.1909	455703	26.4415	0.476512	28.9703	24.0018	24.0011	24.0313
08/01 17:15:00	26.925	256.034	24.0005	24.0011	24.0011	24.001	24.7327	24.7341	24.0009	24.0009	24.0009	24.0008	24.0009	24.0009	24.0009	24.0008	24.0008	24.0008	24.0008	24.0007	26.1986	453620	26.0457	0.474039	28.5893	24.0017	24.001	24.0295
08/01 17:20:00	26.8333	241.188	24.0005	24.001	24.001	24.001	24.7311	24.7322	24.0008	24.0008	24.0009	24.0007	24.0008	24.0008	24.0009	24.0007	24.0008	24.0008	24.0008	24.0007	26.1995	451438	25.6571	0.471474	28.205	24.0017	24.001	24.0278
08/01 17:25:00	26.7417	226.709	24.0005	24.001	24.001	24.001	24.729	24.73	24.0008	24.0008	24.0008	24.0007	24.0008	24.0008	24.0008	24.0007	24.0008	24.0008	24.0008	24.0007	26.1985	449584	25.2758	0.468829	27.818	24.0017	24.0009	24.0261
08/01 17:30:00	26.65	212.602	24.0005	24.001	24.001	24.001	24.7273	24.7283	24.0008	24.0008	24.0008	24.0007	24.0008	24.0008	24.0008	24.0007	24.0008	24.0007	24.0008	24.0007	26.1965	448132	24.902	0.466148	27.4285	24.0017	24.0009	24.0243
08/01 17:35:00	26.5583	194.932	24.0005	24.001	24.001	24.0009	24.7262	24.7273	24.0008	24.0008	24.0008	24.0007	24.0008	24.0008	24.0008	24.0007	24.0007	24.0007	24.0008	24.0007	26.1945	446936	24.457	0.463476	27.037	24.0017	24.0009	24.0226
08/01 17:40:00	26.4667	178.055	24.0005	24.001	24.001	24.0009	24.7257	24.7269	24.0008	24.0008	24.0008	24.0007	24.0008	24.0008	24.0008	24.0007	24.0007	24.0007	24.0008	24.0007	26.1922	445919	24.0278	0.460844	26.6423	24.0017	24.0009	24.0208
08/01 17:45:00	26.375	161.978	24.0005	24.0009	24.0009	24.0009	24.7255	24.7269	24.0008	24.0008	24.0008	24.0007	24.0008	24.0007	24.0008	24.0007	24.0007	24.0007	24.0007	24.0007	26.1895	445027	23.6146	0.45827	26.2453	24.0017	24.0009	24.019
08/01 17:50:00	26.2833	146.707	24.0005	24.0009	24.0009	24.0009	24.7255	24.727	24.0008	24.0007	24.0008	24.0007	24.0007	24.0007	24.0008	24.0007	24.0007	24.0007	24.0007	24.0007	26.1864	444219	23.2175	0.455766	25.8466	24.0017	24.0009	24.0172
08/01 17:55:00	26.1917	132.245	24.0005	24.0009	24.0009	24.0009	24.7257	24.7273	24.0007	24.0007	24.0008	24.0007	24.0007	24.0007	24.0008	24.0007	24.0007	24.0007	24.0007	24.0007	26.1829	443468	22.8366	0.453341	25.4472	24.0017	24.0009	24.0154
08/01 18:00:00	26.1	118.597	24.0005	24.0009	24.0009	24.0008	24.726	24.7278	24.0007	24.0007	24.0008	24.0007	24.0007	24.0007	24.0008	24.0007	24.0006	24.0006	24.0006	24.0005	26.1788	442782	22.4719	0.451002	25.0478	24.0017	24.0009	24.0135
08/01 18:05:00	26.1	105.764	23.93	24.0005	24.0006	24.0005	24.7648	24.7659	24.0006	24.0006	24.0006	24.0005	24.0006	24.0006	24.0006	24.0005	24.0004	24.0004	24.0005	24.0004	26.2565	435509	22.2153	0.448754	24.6493	24.0012	24.0006	24.0112
08/01 18:10:00	26.1	93.7501	23.8664	24.0005	24.0005	24.0005	24.7833	24.7828	24.0006	24.0006	24.0006	24.0006	24.0006	24.0006	24.0006	24.0005	24.0004	24.0004	24.0004	24.0003	26.2853	434628	21.975	0.446861	24.2636	24.0011	24.0005	24.0093
08/01 18:15:00	26.1	82.5551	23.821	24.0005	24.0005	24.0004	24.7901	24.7881	24.0005	24.0006	24.0006	24.0006	24.0005	24.0006	24.0006	24.0006	24.0004	24.0004	24.0004	24.0004	26.2933	434110	21.7511	0.445105	23.8914	24.001	24.0005	24.0075
08/01 18:20:00	26.1	72.1799	23.7874	24.0004	24.0005	24.0004	24.792	24.7889	24.0005	24.0005	24.0006	24.0006	24.0005	24.0005	24.0006	24.0005	24.0004	24.0004	24.0005	24.0004	26.2941	433710	21.5436	0.443479	23.5335	24.001	24.0005	24.0057
08/01 18:25:00	26.1	62.6243	23.7618	24.0004	24.0004	24.0004	24.792	24.7882	24.0005	24.0005	24.0006	24.0006	24.0005	24.0005	24.0006	24.0005	24.0004	24.0005	24.0005	24.0004	26.2922	433406	21.3525	0.442002	23.1907	24.0009	24.0005	24.004
08/01 18:30:00	26.1	53.8871	23.7416	24.0004	24.0004	24.0003	24.7914	24.7872	24.0005	24.0005	24.0006	24.0006	24.0005	24.0005	24.0006	24.0005	24.0005	24.0005	24.0005	24.0005	26.2889	428819	21.1777	0.440654	22.8637	24.0009	24.0004	24.0024
08/01 18:35:00	26.1	46.5917	23.7251	24.0004	24.0004	24.0003	24.7907	24.7864	24.0005	24.0005	24.0006	24.0006	24.0005	24.0005	24.0006	24.0006	24.0005	24.0005	24.0005	24.0005	26.2846	421931	21.0318	0.439045	22.5534	24.0009	24.0004	24.0009
08/01 18:40:00	26.1	39.8284	23.7111	24.0004	24.0004	24.0003	24.7903	24.786	24.0005	24.0005	24.0006	24.0006	24.0005	24.0005	24.0006	24.0006	24.0005	24.0005	24.0005	24.0005	26.2796	416017	20.8966	0.436961	22.2679	24.0009	24.0004	23.9997
08/01 18:45:00	26.1	33.5955	23.6989	24.0004	24.0003	24.0003	24.7901	24.7859	24.0005	24.0005	24.0006	24.0006	24.0005	24.0005	24.0006	24.0005	24.0005	24.0005	24.0005	24.0005	26.2744	410616	20.7719	0.434469	22.007	24.0009	24.0004	23.9986
08/01 18:50:00	26.1	27.8907	23.6881	24.0003	24.0003	24.0003	24.7882	24.7841	24.0005	24.0005	24.0006	24.0006	24.0005	24.0005	24.0006	24.0006	24.0005	24.0005	24.0005	24.0006	26.263	407425	20.6578	0.431601	21.7701	24.0009	24.0004	23.9978
08/01 18:55:00	26.1	22.7115	23.6783	24.0003	24.0003	24.0002	24.7865	24.7826	24.0005	24.0005	24.0006	24.0007	24.0005	24.0005	24.0006	24.0007	24.0005	24.0005	24.0005	24.0006	26.2517	405425	20.5542	0.428535	21.5568	24.0009	24.0004	23.997
08/01 19:00:00	26.1	18.0547	23.6692	24.0003	24.0003	24.0002	24.7858	24.7822	24.0005	24.0005	24.0006	24.0006	24.0005	24.0005	24.0006	24.0006	24.0005	24.0005	24.0005	24.0006	26.2423	403019	20.4611	0.425365	21.3666	24.0009	24.0004	23.9965
08/01 19:05:00	25.8667	11.868	23.6608	24.0003	24.0003	24.0002	24.7874	24.7841	24.0005	24.0005	24.0005	24.0005	24.0005	24.0005	24.0005	24.0005	24.0005	24.0005	24.0005	24.0005	26.2287	396949	20.104	0.422051	21.1991	24.0006	24.0004	23.9958
08/01 19:10:00	25.6333	0	23.6529	24.0003	24.0003	24.0002	24.7889	24.7858	24.0005	24.0005	24.0005	24.0005	24.0005	24.0005	24.0005	24.0005	24.0005	24.0005	24.0005	24.0004	26.21	388583	19.6333	0.418838	21.0231	24.0005	24.0004	23.9953
08/01 19:15:00	25.4	0	23.6454	24.0003	24.0003	24.0002	24.7891	24.7861	24.0005	24.0005	24.0005	24.0005	24.0005	24.0005	24.0005	24.0005	24.0005	24.0005	24.0004	24.0004	26.1855	380328	19.4	0.415001	20.828	24.0005	24.0003	23.9948
08/01 19:20:00	25.1667	0	23.6382	24.0003	24.0003	24.0002	24.7883	24.7855	24.0005	24.0005	24.0005	24.0005	24.0005	24.0005	24.0005	24.0005	24.0005	24.0005	24.0004	24.0004	26.1567	373022	19.1667	0.410519	20.6321	24.0005	24.0003	23.9943
08/01 19:25:00	24.9333	0	23.6313	24.0003	24.0003	24.0001	24.7871	24.7845	24.0005	24.0005	24.0005	24.0005	24.0005	24.0005	24.0005	24.0005	24.0005	24.0005	24.0005	24.0005	26.1255	366621	18.9333	0.405462	20.434	24.0005	24.0003	23.994
08/01 19:30:00	24.7	0	23.6246	24.0002	24.0002	24.0001	24.7857	24.7833	24.0005	24.0005	24.0004	24.0004	24.0005	24.0005	24.0004	24.0004	24.0005	24.0005	24.0005	24.0005	26.0922	387532	18.7	0.399896	20.2324	24.0004	24.0003	23.9937
08/01 19:35:00	24.4667	0	23.6182	24.0002	24.0002	24.0001	24.7841	24.782	24.0005	24.0005	24.0004	24.0005	24.0005	24.0005	24.0004	24.0005	24.0005	24.0005	24.0005	24.0005	26.0573	401708	18.4667	0.396456	20.0259	24.0004	24.0003	23.9931
08/01 19:40:00	24.2333	0	23.6119	23.9983	24.0002	24.0001	24.7823	24.7808	24.0005	24.0005	24.0004	24.0005	24.0005	24.0005	24.0004	24.0005	24.0005	24.0005	24.0005	24.0005	26.0206	403397	18.2333	0.39477	19.8121	24.0004	24.0003	23.9922
08/01 19:45:00	24	0	23.6058	23.9936	24.0002	24.0001	24.78	24.7794	24.0005	24.0005	24.0004	24.0005	24.0005	24.0005	24.0005	24.0005	24.0005	24.0005	24.0005	24.0005	25.9827	400127	18	0.393719	19.5902	24.0004	24.0003	23.9911
08/01 19:50:00	23.7667	0	23.5998	23.9877	24.0002	24.0001	24.7772	24.7781	24.0005	24.0005	24.0004	24.0005	24.0005	24.0005	24.0005	24.0005	24.0005	24.0005	24.0005	24.0005	25.9433	394855	17.7667	0.392845	19.3592	24.0004	24.0003	23.99
08/01 19:55:00	23.5333	0	23.594	23.9812	24.0002	24.0001	24.7742	24.7766	24.0005	24.0005	24.0005	24.0005	24.0005	24.0005	24.0005	24.0005	24.0005	24.0005	24.0005	24.0005	25.9027	390010	17.5333	0.391797	19.1183	24.0004	24.0003	23.9888
08/01 20:00:00	23.3	0	23.5882	23.9743	24.0002	24.0001	24.7708	24.7751	24.0005	24.0005	24.0005	24.0005	24.0005	24.0005	24.0005	24.0006	24.0005	24.0005	24.0005	24.0006	25.8608	384120	17.3	0.390512	18.8665	24.0004	24.0003	23.9876
08/01 20:05:00	23.2583	0	23.5607	23.948	24.0002	24.0001	24.7689	24.7773	24.0005	23.9971	24.0005	24.0005	24.0005	24.0005	24.0005	24.0006	24.0005	24.0005	24.0005	24.0006	25.8348	375835	17.2583	0.388938	18.6031	24.0004	24.0003	23.9864
08/01 20:10:00	23.2167	0	23.5412	23.928	24.0002	24.0001	24.7658	24.7787	24.0005	23.9861	24.0005	24.0006	24.0005	24.0006	24.0005	24.0006	24.0006	24.0006	24.0005	24.0006	25.8086	368057	17.2167	0.387178	18.366	24.0004	24.0003	23.9853
08/01 20:15:00	23.175	0	23.5266	23.9128	23.9974	24.0001	24.7622	24.7792	24.0005	23.973	24.0005	24.0006	24.0006	24.0006	24.0005	24.0006	24.0006	24.0006	24.0006	24.0006	25.7818	362835	17.175	0.385468	18.1646	24.0003	23.9984	23.9845
08/01 20:20:00	23.1333	0	23.5152	23.9005	23.9923	24.0001	24.7584	24.7789	24.0005	23.9591	24.0005	24.0006	24.0006	24.0006	24.0005	24.0006	24.0006	24.0006	24.0006	24.0006	25.7545	359084	17.1333	0.38401	17.9792	24.0003	23.9948	23.9837
08/01 20:25:00	23.0917	0	23.5057	23.8899	23.986	24.0001	24.7547	24.7781	24.0005	23.9448	24.0005	24.0006	24.0006	24.0006	24.0005	24.0006	24.0006	24.0006	24.0006	24.0006	25.727	356067	17.0917	0.382848	17.8097	24.0003	23.9905	23.9829
08/01 20:30:00	23.05	0	23.4975	23.8805	23.9791	24.0001	24.7511	24.7769	24.0005	23.9305	24.0005	24.0006	24.0006	24.0006	24.0006	24.0007	24.0006	24.0006	24.0006	24.0007	25.6992	353425	17.05	0.381969	17.6563	24.0003	23.9857	23.9822
08/01 20:35:00	23.0083	0	23.4902	23.8718	23.9719	24.0001	24.7476	24.7755	24.0006	23.9162	24.0005	24.0006	24.0006	24.0006	24.0006	24.0007	24.0006	24.0006	24.0006	24.0007	25.6711	351003	17.0083	0.379127	17.5188	24.0003	23.9807	23.9819
08/01 20:40:00	22.9667	0	23.4834	23.8637	23.9646	24.0001	24.7443	24.7739	24.0006	23.9021	24.0005	24.0006	24.0006	24.0006	24.0006	24.0007	24.0006	24.0006	24.0006	24.0007	25.6427	348726	16.9667	0.374901	17.3972	24.0003	23.9756	23.9818
08/01 20:45:00	22.925	0	23.4769	23.856	23.9572	24.0001	24.7411	24.7721	24.0006	23.8881	23.9994	24.0006	24.0006	24.0006	24.0006	24.0007	24.0006	24.0006	24.0006	24.0007	25.614	346558	16.925	0.370345	17.2917	24.0003	23.9705	23.982
08/01 20:50:00	22.8833	0	23.4708	23.8486	23.9498	24.0001	24.7379	24.7702	24.0006	23.8741	23.9925	24.0006	24.0006	23.9967	24.0006	24.0007	24.0006	24.0007	24.0006	24.0007	25.585	344514	16.8833	0.365881	17.2021	24.0003	23.9651	23.9821
08/01 20:55:00	22.8417	0	23.4648	23.8414	23.9424	24.0001	24.7346	24.7682	24.0006	23.8604	23.983	24.0006	24.0006	23.9871	24.0006	24.0007	24.0006	24.0007	24.0006	24.0007	25.5557	342608	16.8417	0.361686	17.1285	24.0003	23.9595	23.9824
08/01 21:00:00	22.8	0	23.459	23.8344	23.9351	24.0001	24.7314	24.7659	24.0006	23.8467	23.9723	24.0006	24.0006	23.9751	24.0006	24.0007	24.0006	24.0007	24.0006	24.0007	25.5262	340805	16.8	0.357736	17.0708	24.0003	23.9537	23.9827
08/01 21:05:00	22.475	0	23.4532	23.8277	23.9287	24.1501	24.7271	24.7657	23.9995	23.827	23.955	24.0385	24.0711	23.957	24.0477	24.1522	24.2197	24.1375	24.2027	24.2734	25.5286	332668	16.475	0.354126	17.0292	24.0003	23.9682	23.983
08/01 21:10:00	22.15	0	23.4476	23.8206	23.9207	24.2214	24.7217	24.7646	23.9867	23.8042	23.9339	24.0405	24.0881	23.933	24.0538	24.1965	24.2927	24.1701	24.2685	24.3556	25.5052	323437	16.15	0.350529	16.9639	24.0003	23.966	23.9832
08/01 21:15:00	21.825	0	23.442	23.8138	23.9132	24.2606	24.7152	24.7616	23.9686	23.7801	23.9108	24.0295	24.0848	23.9078	24.044	24.2051	24.3183	24.1734	24.2897	24.3829	25.4649	317171	15.825	0.346811	16.875	23.9984	23.9586	23.9814
08/01 21:20:00	21.5	0	23.4365	23.8072	23.9059	24.2817	24.7078	24.7568	23.9476	23.755	23.8865	24.012	24.0714	23.8818	24.0263	24.1974	24.3206	24.163	24.2889	24.385	25.4147	311756	15.5	0.343005	16.7625	23.9948	23.9486	23.9778
08/01 21:25:00	21.175	0	23.431	23.8007	23.8987	24.2923	24.6997	24.7507	23.9249	23.7291	23.8612	23.9902	24.0528	23.8552	24.0045	24.1811	24.3114	24.1456	24.2771	24.3751	25.3583	306640	15.175	0.339061	16.6264	23.9905	23.9373	23.9733
08/01 21:30:00	20.85	0	23.4256	23.7942	23.8917	24.2965	24.6912	24.7436	23.9009	23.7025	23.8353	23.9666	24.0312	23.8277	23.9802	24.1605	24.2957	24.1241	24.2592	24.3585	25.2974	301621	14.85	0.334942	16.4667	23.9857	23.9252	23.9683
08/01 21:35:00	20.525	0	23.4202	23.7878	23.8846	24.2966	24.6823	24.7357	23.8761	23.6754	23.8089	23.942	24.0076	23.7995	23.9544	24.1372	24.2761	24.1	24.2376	24.3377	25.2333	296631	14.525	0.330625	16.2833	23.9807	23.9127	23.9629
08/01 21:40:00	20.2	0	23.4149	23.7814	23.8776	24.294	24.6731	24.7272	23.8506	23.6487	23.782	23.9164	23.9828	23.7711	23.9274	24.112	24.2537	24.0739	24.2133	24.3141	25.1666	291631	14.2	0.326095	16.0764	23.9756	23.8998	23.9574
08/01 21:45:00	19.875	0	23.4096	23.775	23.8706	24.2893	24.6637	24.7183	23.8245	23.6212	23.7547	23.8901	23.9569	23.742	23.8997	24.0857	24.2293	24.0463	24.1872	24.2884	25.0979	284357	13.875	0.321337	15.8458	23.9705	23.8866	23.9518
08/01 21:50:00	19.55	0	23.4043	23.7685	23.8635	24.2832	24.6541	24.709	23.7979	23.5931	23.727	23.8632	23.9303	23.7124	23.8712	24.0582	24.2031	24.0173	24.1594	24.2608	25.0274	276867	13.55	0.316153	15.5917	23.9651	23.8731	23.9458
08/01 21:55:00	19.225	0	23.399	23.7621	23.8564	24.2758	24.6443	24.6995	23.7709	23.5647	23.699	23.8358	23.9029	23.6823	23.8422	24.0299	24.1756	23.9872	24.1303	24.2319	24.9554	270283	13.225	0.310516	15.3139	23.9595	23.8595	23.9395
08/01 22:00:00	18.9	0	23.3938	23.7557	23.8493	24.2675	24.6345	24.6897	23.7434	23.5358	23.6706	23.8079	23.8749	23.6517	23.8127	24.0009	24.1467	23.9559	24.1	24.2015	24.882	263901	12.9	0.304489	15.0125	23.9537	23.8456	23.933
08/01 22:05:00	18.9	0	23.3885	23.7492	23.8421	24.2583	24.6263	24.6815	23.7233	23.5144	23.6497	23.7874	23.8539	23.6283	23.7903	23.9788	24.1242	23.9312	24.0762	24.1775	24.8275	263507	12.9	0.29808	14.6875	23.9682	23.8339	23.9467
08/01 22:10:00	18.9	0	23.3833	23.7428	23.8349	24.2483	24.6192	24.6744	23.7063	23.496	23.6321	23.7698	23.836	23.608	23.771	23.9596	24.1041	23.9091	24.0549	24.1557	24.7806	263616	12.9	0.292317	14.3896	23.966	23.823	23.9438
08/01 22:15:00	18.9	0	23.3782	23.7363	23.8277	24.2379	24.613	24.668	23.6911	23.4787	23.6163	23.7538	23.8195	23.5886	23.7535	23.9417	24.0852	23.8876	24.0349	24.1349	24.7375	264033	12.9	0.287332	14.1188	23.9586	23.8126	23.9356
08/01 22:20:00	18.9	0	23.373	23.7299	23.8205	24.227	24.6073	24.6621	23.6769	23.4629	23.6017	23.7396	23.804	23.5704	23.7368	23.9253	24.0667	23.8669	24.0155	24.1152	24.6963	264626	12.9	0.282903	13.875	23.9486	23.8025	23.925
08/01 22:25:00	18.9	0	23.3678	23.7235	23.8132	24.2159	24.602	24.6566	23.6634	23.4478	23.5878	23.7255	23.789	23.5529	23.7207	23.9089	24.0485	23.8465	23.9963	24.0952	24.6562	265362	12.9	0.278976	13.6583	23.9373	23.7926	23.9131
08/01 22:30:00	18.9	0	23.3627	23.7171	23.806	24.2045	24.597	24.6513	23.6504	23.4334	23.5744	23.7117	23.7743	23.5359	23.705	23.8927	24.0303	23.8263	23.9772	24.0752	24.6169	266214	12.9	0.275536	13.4688	23.9252	23.7828	23.9006
08/01 22:35:00	18.9	0	23.3575	23.7107	23.7989	24.1929	24.5922	24.6461	23.6378	23.4194	23.561	23.6981	23.7598	23.5192	23.6888	23.8766	24.0121	23.8061	23.9573	24.0551	24.5782	267144	12.9	0.272586	13.3063	23.9127	23.773	23.8876
08/01 22:40:00	18.9	0	23.3524	23.7044	23.7918	24.1811	24.5875	24.6411	23.626	23.4058	23.5482	23.6848	23.7464	23.5028	23.6732	23.8606	23.9947	23.7861	23.9378	24.0349	24.5398	268129	12.9	0.270128	13.1708	23.8998	23.7634	23.8744
08/01 22:45:00	18.9	0	23.3473	23.6982	23.7847	24.1691	24.5829	24.6361	23.614	23.3926	23.5358	23.6716	23.7326	23.4867	23.658	23.8446	23.9768	23.766	23.9185	24.0146	24.5018	269154	12.9	0.26817	13.0625	23.8866	23.7539	23.8609
08/01 22:50:00	18.9	0	23.3422	23.692	23.7776	24.1571	24.5784	24.6312	23.6022	23.3796	23.5238	23.6586	23.7189	23.4708	23.6431	23.8288	23.9586	23.7461	23.8993	23.9942	24.4642	270209	12.9	0.266903	12.9813	23.8731	23.7444	23.8473
08/01 22:55:00	18.9	0	23.3371	23.6858	23.7706	24.1448	24.574	24.6264	23.5905	23.367	23.5121	23.6456	23.7051	23.4553	23.6285	23.813	23.9403	23.7262	23.8801	23.9736	24.4267	271285	12.9	0.266348	12.9271	23.8595	23.735	23.8334
08/01 23:00:00	18.9	0	23.332	23.6797	23.7635	24.1325	24.5696	24.6215	23.5791	23.3546	23.5007	23.6329	23.6915	23.4399	23.6142	23.7973	23.9219	23.7065	23.8611	23.953	24.3896	272379	12.9	0.266432	12.9	23.8456	23.7257	23.8194
08/01 23:05:00	18.85	0	23.327	23.6736	23.7566	24.12	24.565	24.6164	23.5669	23.3412	23.4883	23.6194	23.6775	23.4239	23.5991	23.7812	23.9034	23.6859	23.8413	23.9322	24.3495	272877	12.85	0.267138	12.9	23.8339	23.7163	23.8076
08/01 23:10:00	18.8	0	23.3219	23.6675	23.7496	24.1073	24.5602	24.6112	23.5545	23.3276	23.4755	23.6058	23.6636	23.4077	23.5838	23.7652	23.8847	23.6652	23.8213	23.9113	24.3083	273327	12.8	0.267919	12.8958	23.823	23.7068	23.7966
08/01 23:15:00	18.75	0	23.3168	23.6615	23.7427	24.0946	24.5553	24.6059	23.542	23.3138	23.4627	23.592	23.6496	23.3916	23.5687	23.7492	23.8658	23.6445	23.8013	23.8902	24.2664	273742	12.75	0.268728	12.8875	23.8126	23.6974	23.7861
08/01 23:20:00	18.7	0	23.3118	23.6555	23.7358	24.0816	24.5504	24.6005	23.5294	23.3001	23.4499	23.5782	23.6356	23.3757	23.5537	23.7331	23.8467	23.6239	23.7813	23.8688	24.2243	274128	12.7	0.269537	12.875	23.8025	23.688	23.7758
08/01 23:25:00	18.65	0	23.3068	23.6495	23.7289	24.0685	24.5454	24.595	23.5162	23.2865	23.4371	23.5644	23.6208	23.36	23.5388	23.717	23.8266	23.6032	23.7613	23.8473	24.182	274491	12.65	0.270329	12.8583	23.7926	23.6785	23.7657
08/01 23:30:00	18.6	0	23.3017	23.6435	23.7221	24.0553	24.5403	24.5895	23.5034	23.2729	23.4251	23.5506	23.6065	23.3443	23.5248	23.7009	23.807	23.5824	23.7416	23.8256	24.1396	274834	12.6	0.27109	12.8375	23.7828	23.6692	23.7557
08/01 23:35:00	18.55	0	23.2967	23.6376	23.7152	24.0419	24.5352	24.584	23.4906	23.2594	23.4128	23.5369	23.5924	23.3288	23.5104	23.6847	23.7874	23.5615	23.7215	23.8037	24.0971	275161	12.55	0.271808	12.8125	23.773	23.6599	23.7457
08/01 23:40:00	18.5	0	23.2917	23.6316	23.7084	24.0284	24.5301	24.5785	23.478	23.2459	23.4005	23.5231	23.5783	23.3133	23.4958	23.6686	23.7676	23.5405	23.7011	23.7817	24.0545	275472	12.5	0.272476	12.7833	23.7634	23.6507	23.7359
08/01 23:45:00	18.45	0	23.2867	23.6257	23.7016	24.0147	24.525	24.573	23.4654	23.2326	23.3882	23.5085	23.5643	23.2979	23.4812	23.652	23.7478	23.5195	23.6805	23.7593	24.0118	275771	12.45	0.273088	12.75	23.7539	23.6414	23.7261
08/01 23:50:00	18.4	0	23.2817	23.6198	23.6949	24.0009	24.5199	24.5674	23.4528	23.2201	23.3759	23.4944	23.5504	23.283	23.4666	23.6357	23.7278	23.4984	23.6597	23.737	23.9691	276057	12.4	0.27364	12.7125	23.7444	23.6322	23.7163
08/01 23:55:00	18.35	0	23.2767	23.6139	23.6881	23.9869	24.5147	24.5619	23.4403	23.2072	23.3636	23.4804	23.5365	23.2677	23.4519	23.6196	23.7077	23.4769	23.6388	23.7147	23.9262	276331	12.35	0.274127	12.6708	23.735	23.6229	23.7067
08/01 24:00:00	18.3	0	23.2717	23.608	23.6814	23.9728	24.5096	24.5563	23.4279	23.1943	23.3513	23.4665	23.5226	23.2523	23.4373	23.6035	23.6874	23.4553	23.6177	23.6922	23.8833	276595	12.3	0.274547	12.625	23.7257	23.6137	23.6971
08/02 00:05:00	18.2583	0	23.2667	23.6022	23.6746	23.9585	24.5045	24.5508	23.4154	23.1813	23.339	23.4526	23.5085	23.2369	23.4226	23.5873	23.6668	23.4335	23.5964	23.6695	23.841	274693	12.2583	0.274899	12.575	23.7163	23.6045	23.6873
08/02 00:10:00	18.2167	0	23.2618	23.5963	23.6679	23.9441	24.4993	24.5452	23.403	23.1684	23.3268	23.4388	23.4944	23.2215	23.408	23.5711	23.6461	23.4116	23.575	23.6466	23.7988	272520	12.2167	0.27505	12.5257	23.7068	23.5953	23.6776
08/02 00:15:00	18.175	0	23.2568	23.5905	23.6612	23.9296	24.4942	24.5397	23.3907	23.1554	23.3145	23.425	23.4803	23.2061	23.3933	23.5549	23.6252	23.3896	23.5535	23.6236	23.7567	270209	12.175	0.274983	12.4771	23.6974	23.5861	23.6679
08/02 00:20:00	18.1333	0	23.2518	23.5846	23.6546	23.915	24.4891	24.5341	23.3783	23.1425	23.3023	23.4112	23.4662	23.1907	23.3787	23.5387	23.6042	23.3675	23.5318	23.6005	23.7146	267823	12.1333	0.274688	12.4292	23.688	23.5769	23.6583
08/02 00:25:00	18.0917	0	23.2469	23.5788	23.6479	23.9002	24.484	24.5286	23.3659	23.1295	23.2901	23.3974	23.4521	23.1754	23.3641	23.5225	23.583	23.3453	23.5101	23.5772	23.6726	265310	12.0917	0.274163	12.3819	23.6785	23.5677	23.6487
08/02 00:30:00	18.05	0	23.2419	23.573	23.6412	23.8853	24.4788	24.523	23.3536	23.1166	23.278	23.3836	23.438	23.16	23.3495	23.5063	23.5617	23.323	23.4882	23.5539	23.6307	262785	12.05	0.273398	12.3354	23.6692	23.5585	23.6393
08/02 00:35:00	18.0083	0	23.2369	23.5672	23.6346	23.8703	24.4737	24.5174	23.3413	23.1037	23.2658	23.3699	23.4239	23.1447	23.3349	23.4901	23.5404	23.3006	23.4663	23.5304	23.5889	260261	12.0083	0.272394	12.2896	23.6599	23.5493	23.6299
08/02 00:40:00	17.9667	0	23.232	23.5614	23.6279	23.8552	24.4685	24.5118	23.329	23.0909	23.2537	23.3561	23.4098	23.1294	23.3203	23.4739	23.5189	23.2781	23.4443	23.5069	23.5472	257688	11.9667	0.271152	12.2444	23.6507	23.5402	23.6206
08/02 00:45:00	17.925	0	23.2271	23.5556	23.6213	23.84	24.4633	24.5061	23.3167	23.078	23.2415	23.3424	23.3957	23.1142	23.3058	23.4577	23.4973	23.2555	23.4222	23.4833	23.5056	255177	11.925	0.26967	12.2	23.6414	23.531	23.6113
08/02 00:50:00	17.8833	0	23.2222	23.5498	23.6147	23.8247	24.4581	24.5005	23.3044	23.0652	23.2294	23.3287	23.3816	23.0989	23.2913	23.4415	23.4757	23.2329	23.4	23.4596	23.4641	252711	11.8833	0.267954	12.1562	23.6322	23.5219	23.6022
08/02 00:55:00	17.8417	0	23.2173	23.5441	23.6081	23.8093	24.4529	24.4948	23.2922	23.0524	23.2174	23.315	23.3675	23.0837	23.2768	23.4254	23.454	23.2102	23.3777	23.4359	23.4229	250282	11.8417	0.266008	12.1132	23.6229	23.5128	23.593
08/02 01:00:00	17.8	0	23.2125	23.5383	23.6015	23.7938	24.4477	24.4891	23.28	23.0397	23.2053	23.3013	23.3534	23.0685	23.2623	23.4092	23.4321	23.1875	23.3554	23.4121	23.3818	247888	11.8	0.263838	12.0708	23.6137	23.5036	23.5839
08/02 01:05:00	17.75	0	23.2077	23.5325	23.5949	23.7782	24.4424	24.4834	23.2675	23.0267	23.193	23.2874	23.3392	23.0532	23.2476	23.3929	23.4101	23.1645	23.3329	23.388	23.3404	246806	11.75	0.261445	12.0292	23.6045	23.4945	23.5748
08/02 01:10:00	17.7	0	23.2029	23.5268	23.5883	23.7626	24.4371	24.4776	23.255	23.0137	23.1807	23.2735	23.3248	23.0377	23.2329	23.3765	23.3878	23.1413	23.3101	23.3637	23.299	245843	11.7	0.259122	11.9868	23.5953	23.4853	23.5658
08/02 01:15:00	17.65	0	23.1981	23.521	23.5817	23.7468	24.4317	24.4718	23.2425	23.0007	23.1684	23.2595	23.3104	23.0223	23.2181	23.3601	23.3655	23.1181	23.2873	23.3394	23.2576	244952	11.65	0.256899	11.9437	23.5861	23.4761	23.5567
08/02 01:20:00	17.6	0	23.1934	23.5153	23.5752	23.731	24.4264	24.4659	23.2299	22.9876	23.156	23.2455	23.296	23.0068	23.2034	23.3437	23.343	23.0948	23.2644	23.315	23.2165	244111	11.6	0.254794	11.9	23.5769	23.467	23.5476
08/02 01:25:00	17.55	0	23.1886	23.5096	23.5686	23.7152	24.4209	24.4601	23.2174	22.9746	23.1436	23.2315	23.2816	22.9914	23.1886	23.3272	23.3205	23.0714	23.2414	23.2906	23.1756	243302	11.55	0.252818	11.8556	23.5677	23.4578	23.5385
08/02 01:30:00	17.5	0	23.1839	23.5038	23.5621	23.6992	24.4155	24.4542	23.2048	22.9615	23.1312	23.2175	23.2671	22.9759	23.1738	23.3108	23.2979	23.048	23.2184	23.266	23.135	242517	11.5	0.250984	11.8104	23.5585	23.4486	23.5294
08/02 01:35:00	17.45	0	23.1792	23.4981	23.5555	23.6833	24.41	24.4482	23.1922	22.9485	23.1188	23.2035	23.2527	22.9605	23.1591	23.2944	23.2752	23.0245	23.1953	23.2415	23.0946	241747	11.45	0.249295	11.7646	23.5493	23.4395	23.5202
08/02 01:40:00	17.4	0	23.1745	23.4924	23.549	23.6672	24.4046	24.4423	23.1797	22.9354	23.1064	23.1894	23.2383	22.9451	23.1443	23.2779	23.2525	23.0009	23.1721	23.2168	23.0546	240988	11.4	0.247752	11.7181	23.5402	23.4303	23.5111
08/02 01:45:00	17.35	0	23.1698	23.4867	23.5425	23.6511	24.3991	24.4363	23.1671	22.9224	23.0941	23.1754	23.2238	22.9297	23.1296	23.2615	23.2297	22.9774	23.1489	23.1922	23.0147	240237	11.35	0.24636	11.6708	23.531	23.4212	23.5019
08/02 01:50:00	17.3	0	23.1651	23.481	23.536	23.635	24.3936	24.4304	23.1545	22.9094	23.0817	23.1614	23.2094	22.9143	23.1148	23.2451	23.2069	22.9538	23.1257	23.1675	22.9753	239491	11.3	0.245115	11.6229	23.5219	23.412	23.4927
08/02 01:55:00	17.25	0	23.1605	23.4753	23.5295	23.6188	24.388	24.4244	23.1419	22.8963	23.0693	23.1474	23.1949	22.8989	23.1001	23.2287	23.184	22.9302	23.1025	23.1428	22.936	238748	11.25	0.244014	11.5743	23.5128	23.4029	23.4835
08/02 02:00:00	17.2	0	23.1559	23.4696	23.5229	23.6026	24.3825	24.4184	23.1294	22.8833	23.0569	23.1334	23.1805	22.8835	23.0854	23.2123	23.1611	22.9065	23.0792	23.118	22.8971	238008	11.2	0.243053	11.525	23.5036	23.3938	23.4743
08/02 02:05:00	17.25	0	23.1512	23.4639	23.5164	23.5863	24.3775	24.4129	23.1196	22.8731	23.0473	23.1222	23.1688	22.8709	23.0735	23.1987	23.1409	22.8856	23.0586	23.096	22.8647	239243	11.25	0.242229	11.475	23.4945	23.3855	23.465
08/02 02:10:00	17.3	0	23.1466	23.4582	23.51	23.5701	24.3728	24.4078	23.111	22.8641	23.039	23.1122	23.1584	22.8595	23.0628	23.1863	23.122	22.8659	23.0393	23.0753	22.8355	240601	11.3	0.241599	11.4333	23.4853	23.3776	23.4557
08/02 02:15:00	17.35	0	23.142	23.4525	23.5035	23.5538	24.3685	24.4029	23.1031	22.8557	23.0314	23.1028	23.1487	22.8488	23.0528	23.1746	23.1038	22.8469	23.0207	23.0551	22.8081	242048	11.35	0.241162	11.4	23.4761	23.3699	23.4465
08/02 02:20:00	17.4	0	23.1374	23.4468	23.497	23.5375	24.3643	24.3982	23.0957	22.8478	23.0242	23.0939	23.1394	22.8385	23.0433	23.1634	23.0861	22.8284	23.0026	23.0355	22.7821	243567	11.4	0.24092	11.375	23.467	23.3624	23.4372
08/02 02:25:00	17.45	0	23.1328	23.4412	23.4906	23.5214	24.3602	24.3937	23.0887	22.8402	23.0174	23.0854	23.1305	22.8286	23.0341	23.1524	23.0687	22.8101	22.9848	23.0162	22.757	245142	11.45	0.240875	11.3583	23.4578	23.355	23.428
08/02 02:30:00	17.5	0	23.1283	23.4356	23.4842	23.5053	24.3563	24.3892	23.0819	22.8329	23.0108	23.0771	23.1218	22.8189	23.0252	23.1418	23.0516	22.7922	22.9674	22.9972	22.7328	246764	11.5	0.241028	11.35	23.4486	23.3477	23.4188
08/02 02:35:00	17.55	0	23.1237	23.43	23.4778	23.4892	24.3524	24.3849	23.0753	22.8258	23.0044	23.069	23.1134	22.8094	23.0164	23.1313	23.0347	22.7746	22.9502	22.9784	22.7092	248426	11.55	0.241382	11.35	23.4395	23.3405	23.4096
08/02 02:40:00	17.6	0	23.1192	23.4244	23.4714	23.4733	24.3485	24.3805	23.0689	22.8189	22.9983	23.0611	23.1051	22.8001	23.0079	23.121	23.0181	22.7572	22.9332	22.9599	22.6864	250120	11.6	0.241939	11.3583	23.4303	23.3334	23.4004
08/02 02:45:00	17.65	0	23.1146	23.4189	23.4651	23.4574	24.3447	24.3762	23.0626	22.8121	22.9923	23.0534	23.097	22.791	22.9996	23.1109	23.0017	22.74	22.9165	22.9415	22.6642	251844	11.65	0.2427	11.375	23.4212	23.3263	23.3912
08/02 02:50:00	17.7	0	23.1101	23.4133	23.4588	23.4416	24.341	24.372	23.0566	22.8055	22.9864	23.0458	23.089	22.782	22.9914	23.101	22.9855	22.723	22.8999	22.9234	22.6426	253593	11.7	0.243667	11.4	23.412	23.3193	23.3821
08/02 02:55:00	17.75	0	23.1056	23.4079	23.4525	23.4258	24.3373	24.3677	23.0506	22.7991	22.9807	23.0384	23.0812	22.7732	22.9834	23.0912	22.9694	22.7061	22.8835	22.9055	22.6215	255367	11.75	0.244842	11.4333	23.4029	23.3123	23.373
08/02 03:00:00	17.8	0	23.1011	23.4024	23.4463	23.4101	24.3336	24.3635	23.0448	22.7927	22.9751	23.0311	23.0735	22.7645	22.9755	23.0816	22.9535	22.6895	22.8674	22.8877	22.601	257164	11.8	0.246227	11.475	23.3938	23.3055	23.3639
08/02 03:05:00	17.75	0	23.0966	23.3969	23.44	23.3945	24.3293	24.3588	23.0362	22.7836	22.9667	23.021	23.0631	22.7531	22.9648	23.0691	22.9349	22.6702	22.8485	22.8673	22.5747	255201	11.75	0.247823	11.525	23.3855	23.2978	23.3557
08/02 03:10:00	17.7	0	23.0921	23.3915	23.4338	23.379	24.3248	24.3537	23.0263	22.7734	22.9571	23.0097	23.0514	22.7406	22.953	23.0556	22.9152	22.6498	22.8284	22.8457	22.546	253009	11.7	0.249153	11.5667	23.3776	23.2897	23.3478
08/02 03:15:00	17.65	0	23.0877	23.3861	23.4276	23.3634	24.3199	24.3484	23.0158	22.7625	22.9468	22.9977	23.0391	22.7275	22.9405	23.0414	22.8948	22.6287	22.8077	22.8236	22.516	250680	11.65	0.250187	11.6	23.3699	23.2815	23.3402
08/02 03:20:00	17.6	0	23.0832	23.3807	23.4214	23.3479	24.3148	24.3428	23.0049	22.7512	22.9361	22.9854	23.0264	22.7141	22.9277	23.0269	22.874	22.6073	22.7867	22.8011	22.4855	248265	11.6	0.250906	11.625	23.3624	23.2731	23.3327
08/02 03:25:00	17.55	0	23.0788	23.3753	23.4153	23.3323	24.3096	24.3371	22.9937	22.7397	22.9252	22.9729	23.0134	22.7004	22.9146	23.0122	22.8529	22.5857	22.7654	22.7784	22.4547	245803	11.55	0.251298	11.6417	23.355	23.2647	23.3254
08/02 03:30:00	17.5	0	23.0743	23.3699	23.4091	23.3167	24.3043	24.3313	22.9823	22.728	22.914	22.9602	23.0003	22.6866	22.9014	22.9973	22.8316	22.5639	22.7438	22.7555	22.4237	243322	11.5	0.251353	11.65	23.3477	23.2562	23.3181
08/02 03:35:00	17.45	0	23.0699	23.3645	23.4029	23.301	24.2989	24.3255	22.9708	22.7161	22.9027	22.9473	22.987	22.6726	22.888	22.9822	22.8101	22.542	22.7222	22.7325	22.3927	240840	11.45	0.251066	11.65	23.3405	23.2477	23.311
08/02 03:40:00	17.4	0	23.0655	23.359	23.3967	23.2853	24.2935	24.3195	22.9591	22.7041	22.8912	22.9343	22.9736	22.6586	22.8745	22.9671	22.7886	22.5199	22.7004	22.7093	22.3618	238373	11.4	0.250434	11.6417	23.3334	23.2392	23.3039
08/02 03:45:00	17.35	0	23.0611	23.3536	23.3905	23.2696	24.288	24.3135	22.9473	22.6921	22.8797	22.9212	22.9601	22.6444	22.8609	22.9519	22.7669	22.4977	22.6785	22.686	22.3309	235927	11.35	0.249455	11.625	23.3263	23.2306	23.2969
08/02 03:50:00	17.3	0	23.0567	23.3482	23.3843	23.2539	24.2824	24.3075	22.9354	22.6799	22.8681	22.908	22.9465	22.6302	22.8473	22.9366	22.745	22.4754	22.6565	22.6627	22.3001	233509	11.3	0.248129	11.6	23.3193	23.222	23.29
08/02 03:55:00	17.25	0	23.0524	23.3427	23.3781	23.2381	24.2768	24.3014	22.9235	22.6677	22.8564	22.8948	22.9329	22.616	22.8336	22.9212	22.7231	22.4531	22.6344	22.6392	22.2694	231123	11.25	0.246455	11.5667	23.3123	23.2134	23.2831
08/02 04:00:00	17.2	0	23.048	23.3373	23.3718	23.2223	24.2712	24.2954	22.9114	22.6554	22.8446	22.8815	22.9192	22.6016	22.8198	22.9058	22.7012	22.4307	22.6123	22.6157	22.2389	228771	11.2	0.244435	11.525	23.3055	23.2047	23.2764
08/02 04:05:00	17.2917	0	23.0437	23.3318	23.3656	23.2064	24.2663	24.29	22.9028	22.6466	22.8363	22.8716	22.9088	22.5908	22.8094	22.8938	22.6825	22.4118	22.5936	22.5956	22.2173	229968	11.2917	0.242068	11.475	23.2978	23.1971	23.2688
08/02 04:10:00	17.3833	0	23.0393	23.3267	23.3597	23.1909	24.2619	24.2851	22.8957	22.6384	22.8295	22.8632	22.8999	22.5811	22.8005	22.8831	22.6651	22.3944	22.5763	22.5766	22.2001	231395	11.3833	0.239966	11.4368	23.2897	23.1901	23.2608
08/02 04:15:00	17.475	0	23.035	23.3215	23.3537	23.1753	24.2579	24.2806	22.8893	22.6314	22.8235	22.8564	22.8916	22.5723	22.7924	22.8732	22.6487	22.3776	22.5598	22.5585	22.1854	232978	11.475	0.238165	11.4104	23.2815	23.1833	23.2528
08/02 04:20:00	17.5667	0	23.0307	23.3161	23.3476	23.1597	24.2541	24.2763	22.8835	22.6251	22.8181	22.8496	22.8837	22.5638	22.7849	22.8639	22.6326	22.3612	22.544	22.5408	22.1724	234680	11.5667	0.236689	11.3958	23.2731	23.1766	23.2446
08/02 04:25:00	17.6583	0	23.0263	23.3108	23.3415	23.1441	24.2505	24.2721	22.8781	22.6191	22.813	22.843	22.8761	22.5555	22.7777	22.8547	22.6168	22.345	22.5284	22.5237	22.1605	236474	11.6583	0.235557	11.3931	23.2647	23.1699	23.2363
08/02 04:30:00	17.75	0	23.022	23.3054	23.3354	23.1286	24.247	24.2681	22.8729	22.6134	22.8081	22.8366	22.8686	22.5473	22.7706	22.8458	22.6012	22.329	22.5132	22.5066	22.1496	238341	11.75	0.23478	11.4021	23.2562	23.1633	23.2281
08/02 04:35:00	17.8417	0	23.0177	23.3001	23.3293	23.1132	24.2436	24.2641	22.8679	22.608	22.8027	22.8304	22.8613	22.5393	22.7626	22.837	22.5858	22.3131	22.4974	22.49	22.1395	240265	11.8417	0.234365	11.4229	23.2477	23.1566	23.2197
08/02 04:40:00	17.9333	0	23.0135	23.2948	23.3232	23.098	24.2402	24.2602	22.8639	22.6029	22.7979	22.8243	22.8547	22.5313	22.7553	22.8283	22.5712	22.2973	22.4819	22.4735	22.1301	242237	11.9333	0.234317	11.4556	23.2392	23.1501	23.2114
08/02 04:45:00	18.025	0	23.0092	23.2895	23.3171	23.0828	24.2369	24.2564	22.8596	22.5979	22.7934	22.8184	22.848	22.5236	22.7481	22.8196	22.5565	22.2817	22.4666	22.457	22.1213	244250	12.025	0.234639	11.5	23.2306	23.1436	23.203
08/02 04:50:00	18.1167	0	23.0049	23.2842	23.3111	23.0677	24.2337	24.2525	22.8552	22.5932	22.7893	22.8125	22.8412	22.516	22.7412	22.8109	22.5417	22.2663	22.4516	22.4405	22.1132	246297	12.1167	0.235333	11.5563	23.222	23.1372	23.1947
08/02 04:55:00	18.2083	17.2962	23.0006	23.2791	23.3052	23.0528	24.2309	24.2491	22.8663	22.7793	22.8287	22.823	22.8497	22.7002	22.7782	22.8184	22.5421	22.442	22.4803	22.4401	22.1062	248376	12.5543	0.236398	11.6243	23.2134	23.1485	23.1863
08/02 05:00:00	18.3	21.8462	22.9964	23.275	23.3004	23.0391	24.2308	24.2485	22.881	23.0202	22.8883	22.8369	22.8616	22.9386	22.8353	22.8291	22.546	22.6729	22.5291	22.443	22.1031	250483	12.7369	0.237836	11.733	23.2047	23.1661	23.178
08/02 05:05:00	18.3	26.8941	22.9921	23.2727	23.2972	23.0272	24.233	24.2502	22.8938	23.2583	22.9433	22.8485	22.872	23.174	22.8878	22.838	22.5488	22.9015	22.5737	22.4443	22.0976	251615	12.8379	0.239645	11.8611	23.1971	23.1839	23.1708
08/02 05:10:00	18.3	32.4429	22.9879	23.2716	23.2954	23.0167	24.2366	24.2533	22.9067	23.3073	22.9955	22.8603	22.8826	23.2199	22.9376	22.8471	22.552	22.9413	22.6156	22.446	22.0914	252731	12.9489	0.241449	11.9899	23.1901	23.1916	23.1643
08/02 05:15:00	18.3	38.4956	22.9837	23.2709	23.2938	23.0066	24.2397	24.2559	22.9189	23.3146	23.0448	22.8725	22.8928	23.2238	22.9847	22.8569	22.5548	22.9379	22.655	22.4485	22.0837	253829	13.0699	0.243227	12.1204	23.1833	23.1968	23.158
08/02 05:20:00	18.3	45.0542	22.9795	23.2697	23.2918	22.9961	24.2422	24.2578	22.9305	23.3421	23.0943	22.8855	22.9024	23.2492	23.0321	22.8675	22.557	22.9556	22.6949	22.4519	22.0752	254913	13.2011	0.244965	12.2533	23.1766	23.2029	23.1517
08/02 05:25:00	18.3	52.1206	22.9754	23.2679	23.2893	22.9852	24.2444	24.2594	22.9418	23.377	23.1371	22.8992	22.9119	23.2827	23.0729	22.879	22.5592	22.9817	22.7283	22.4561	22.0663	255985	13.3424	0.246651	12.3895	23.1699	23.2085	23.1455
08/02 05:30:00	18.3	59.696	22.9712	23.2658	23.2863	22.9739	24.2463	24.2608	22.9533	23.4172	23.173	22.9135	22.9216	23.3222	23.107	22.8912	22.5617	23.0138	22.7552	22.4612	22.0573	257050	13.4939	0.248277	12.5298	23.1633	23.2136	23.1395
08/02 05:35:00	18.3	68.8354	22.9671	23.2633	23.283	22.9623	24.248	24.262	22.9654	23.4678	23.2043	22.9284	22.932	23.3728	23.1368	22.904	22.5649	23.0572	22.7778	22.4669	22.0483	258101	13.6767	0.249836	12.6752	23.1566	23.2188	23.1334
08/02 05:40:00	18.3	78.7546	22.963	23.2604	23.2793	22.9504	24.2497	24.2631	22.9782	23.5267	23.2334	22.9437	22.9434	23.4322	23.1648	22.9174	22.5691	23.1094	22.7987	22.4732	22.0393	259118	13.8751	0.251322	12.8281	23.1501	23.2242	23.1275
08/02 05:45:00	18.3	89.4542	22.959	23.2573	23.2755	22.9382	24.2513	24.2643	22.9919	23.5917	23.2551	22.9593	22.9557	23.4982	23.1859	22.9313	22.5742	23.1684	22.8126	22.4799	22.0304	260149	14.0891	0.252729	12.9899	23.1436	23.2293	23.1217
08/02 05:50:00	18.3	100.934	22.955	23.254	23.2714	22.9259	24.2529	24.2655	23.0065	23.6613	23.2702	22.9753	22.969	23.5692	23.2009	22.9456	22.5804	23.2324	22.8204	22.487	22.0216	261188	14.3187	0.254054	13.1619	23.1372	23.2341	23.116
08/02 05:55:00	18.3	113.193	22.951	23.2507	23.2674	22.9136	24.2545	24.2666	23.022	23.7347	23.2826	22.9913	22.9834	23.6443	23.2138	22.9602	22.5876	23.3006	22.8261	22.4945	22.013	262232	14.5639	0.255295	13.3454	23.1485	23.2391	23.1281
08/02 06:00:00	18.3	126.229	22.9471	23.2474	23.2634	22.9015	24.2562	24.2679	23.0385	23.8113	23.2939	23.0076	22.9989	23.7232	23.2262	22.9752	22.5959	23.3727	22.8314	22.5024	22.0045	263281	14.8246	0.256449	13.5129	23.1661	23.2444	23.1464
08/02 06:05:00	18.5833	140.04	22.9432	23.2442	23.2596	22.8895	24.2595	24.2708	23.0669	23.9068	23.3207	23.0353	23.0264	23.8212	23.2546	23.0017	22.6163	23.4639	22.8526	22.5217	22.0142	269363	15.3841	0.257516	13.6868	23.1839	23.2542	23.165
08/02 06:10:00	18.8667	154.623	22.9393	23.2424	23.2573	22.8791	24.2642	24.2753	23.099	23.9983	23.3506	23.0659	23.0579	23.9236	23.2867	23.0314	22.6408	23.56	22.8776	22.5444	22.0338	276137	15.9591	0.258995	13.899	23.1916	23.2663	23.1736
08/02 06:15:00	19.15	169.974	22.9355	23.2402	23.2546	22.8685	24.2698	24.2808	23.1324	24.0008	23.3808	23.0972	23.0907	23.9985	23.3193	23.0617	22.6668	23.6581	22.9034	22.5679	22.0593	282293	16.5495	0.260945	14.1499	23.1968	23.2767	23.1798
08/02 06:20:00	19.4333	186.089	22.9317	23.2381	23.2517	22.8581	24.2754	24.2867	23.1672	24.0009	23.4116	23.1294	23.1248	24.0008	23.3525	23.0927	22.6945	23.7583	22.9302	22.5927	22.089	287071	17.1551	0.263317	14.4398	23.2029	23.2831	23.1871
08/02 06:25:00	19.7167	202.961	22.928	23.2361	23.2491	22.8479	24.2812	24.2924	23.2031	24.001	23.4432	23.1627	23.1602	24.001	23.387	23.1255	22.7234	23.8609	22.9582	22.619	22.1217	293777	17.7759	0.265997	14.7694	23.2085	23.2898	23.1941
08/02 06:30:00	20	220.585	22.9243	23.2342	23.2466	22.8381	24.287	24.2982	23.2399	24.0011	23.4755	23.1972	23.1968	24.001	23.4223	23.1596	22.754	23.966	22.9874	22.6469	22.1573	301409	18.4117	0.269147	15.1388	23.2136	23.297	23.2008
08/02 06:35:00	20.2833	234.809	22.9206	23.2324	23.2444	22.8286	24.293	24.304	23.2773	24.0011	23.5067	23.2319	23.2342	24.0011	23.4568	23.1941	22.7853	23.9998	23.0157	22.6751	22.1971	309667	18.9795	0.272843	15.5486	23.2188	23.3043	23.2076
08/02 06:40:00	20.5667	249.409	22.917	23.2308	23.2423	22.8196	24.299	24.3098	23.315	24.0012	23.5364	23.2668	23.2721	24.0012	23.4897	23.229	22.8175	24.0009	23.0429	22.704	22.2407	318407	19.5548	0.27714	15.9905	23.2242	23.3116	23.2148
08/02 06:45:00	20.85	264.38	22.9134	23.2293	23.2403	22.811	24.305	24.3156	23.3531	24.0012	23.5638	23.3019	23.3106	24.0012	23.5204	23.2643	22.8506	24.001	23.0683	22.7339	22.2823	327566	20.1376	0.282081	16.4638	23.2293	23.3189	23.2217
08/02 06:50:00	21.1333	279.715	22.9099	23.2278	23.2384	22.8029	24.3111	24.3214	23.3917	24.0013	23.5905	23.3376	23.3498	24.0013	23.5508	23.3004	22.8848	24.0011	23.0935	22.7646	22.3227	337127	20.7276	0.287699	16.9679	23.2341	23.3263	23.2285
08/02 06:55:00	21.4167	295.408	22.9063	23.2264	23.2366	22.7951	24.3171	24.3273	23.4309	24.0013	23.6171	23.3739	23.3898	24.0013	23.5811	23.3373	22.9199	24.0012	23.1187	22.7964	22.3624	347091	21.3248	0.294028	17.502	23.2391	23.3339	23.2354
08/02 07:00:00	21.7	311.451	22.9029	23.2251	23.2349	22.7877	24.3231	24.3331	23.4707	24.0013	23.6432	23.4109	23.4305	24.0013	23.6109	23.375	22.9561	24.0013	23.1438	22.8292	22.402	357459	21.929	0.301099	18.0654	23.2444	23.3416	23.2427
08/02 07:05:00	21.8833	327.836	23.2809	23.669	23.6781	23.2306	24.3418	24.3528	23.9035	24.0012	23.9866	23.8645	23.8841	24.0012	23.9717	23.8302	23.4158	24.0012	23.5939	23.2811	22.4791	372406	22.44	0.308947	18.6574	23.2542	23.7532	23.2545
08/02 07:10:00	22.0667	344.556	23.6478	23.9982	23.998	23.6558	24.3804	24.3935	23.9989	24.0011	24.0006	23.9981	23.9985	24.0012	24.0003	23.9978	23.8134	24.0013	23.9533	23.6557	22.5862	413632	22.9578	0.317534	19.2454	23.2663	23.9984	23.2685
08/02 07:15:00	22.25	361.602	23.9741	24.0003	24.0003	23.9959	24.4256	24.4415	24.0016	24.0018	24.0017	24.0015	24.0015	24.0018	24.0016	24.0014	23.998	24.0021	24.0013	23.9333	22.7258	435005	23.482	0.328992	19.8286	23.2767	24.0007	23.2803
08/02 07:20:00	22.4333	378.967	23.9997	24.0004	24.0004	24.0002	24.4562	24.4729	24.0017	24.0019	24.0018	24.0016	24.0017	24.0019	24.0017	24.0016	24.0013	24.0021	24.0015	23.9989	22.8575	439745	24.0127	0.341718	20.4063	23.2831	24.0008	23.2879
08/02 07:25:00	22.6167	396.64	24.0001	24.0005	24.0005	24.0004	24.4807	24.4974	24.0018	24.0019	24.0018	24.0017	24.0018	24.0019	24.0018	24.0017	24.0015	24.002	24.0016	24.0013	22.9569	443476	24.5495	0.354441	20.9778	23.2898	24.0009	23.2958
08/02 07:30:00	22.8	414.613	24.0001	24.0006	24.0006	24.0005	24.4995	24.516	24.0019	24.0019	24.0019	24.0018	24.0019	24.0019	24.0019	24.0018	24.0016	24.002	24.0017	24.0015	23.0379	446528	25.0923	0.366916	21.5423	23.297	24.001	23.3042
08/02 07:35:00	22.9833	429.465	24.0001	24.0007	24.0007	24.0006	24.5139	24.53	24.0019	24.0019	24.0019	24.0019	24.0019	24.0019	24.0019	24.0018	24.0017	24.0019	24.0017	24.0016	23.1081	449088	25.5726	0.379009	22.099	23.3043	24.0011	23.3126
08/02 07:40:00	23.1667	444.427	24.0002	24.0008	24.0008	24.0007	24.5249	24.5406	24.002	24.0019	24.002	24.0019	24.002	24.0019	24.002	24.0019	24.0018	24.002	24.0018	24.0017	23.1723	451378	26.0552	0.390628	22.6484	23.3116	24.0012	23.3212
08/02 07:45:00	23.35	459.491	24.0002	24.0009	24.0009	24.0008	24.5334	24.5486	24.0021	24.0019	24.002	24.0019	24.002	24.0019	24.002	24.0019	24.0019	24.002	24.0019	24.0018	23.2322	453450	26.5398	0.401708	23.1901	23.3189	24.0013	23.3297
08/02 07:50:00	23.5333	474.649	24.0003	24.001	24.001	24.0009	24.5401	24.5548	24.0021	24.0019	24.002	24.002	24.0021	24.0019	24.002	24.002	24.002	24.0019	24.002	24.0018	23.2891	455363	27.0263	0.412199	23.7236	23.3263	24.0013	23.3385
08/02 07:55:00	23.7167	489.894	24.0003	24.0011	24.0011	24.001	24.5456	24.5598	24.0021	24.0019	24.0021	24.002	24.0021	24.0019	24.002	24.002	24.0021	24.0019	24.002	24.0019	23.3436	457159	27.5145	0.422052	24.2485	23.3339	24.0014	23.3474
08/02 08:00:00	23.9	505.218	24.0003	24.0012	24.0012	24.0011	24.5501	24.5639	24.0021	24.0018	24.0021	24.002	24.0021	24.0018	24.0021	24.002	24.0021	24.0019	24.0021	24.002	23.3964	458617	28.0044	0.431224	24.7643	23.3416	24.0015	23.3565
08/02 08:05:00	24.1333	520.612	24.0004	24.0013	24.0013	24.0012	24.554	24.5674	24.0021	24.0018	24.0021	24.002	24.0021	24.0018	24.0021	24.002	24.0022	24.0019	24.0021	24.002	23.4483	460434	28.5456	0.439654	25.2706	23.7532	24.0015	23.7686
08/02 08:10:00	24.3667	536.069	24.0004	24.0013	24.0014	24.0012	24.5576	24.5707	24.0021	24.0018	24.0021	24.002	24.0021	24.0018	24.0021	24.002	24.0021	24.0019	24.0021	24.002	23.4985	462726	29.088	0.44699	25.7794	23.9984	24.0016	24.015
08/02 08:15:00	24.6	551.58	24.0004	24.0015	24.0015	24.0013	24.5606	24.5734	24.0021	24.002	24.0022	24.0021	24.0021	24.002	24.0022	24.0021	24.0021	24.0019	24.0021	24.0021	23.5469	464994	29.6316	0.451081	26.2902	24.0007	24.0017	24.0194
08/02 08:20:00	24.8333	567.137	24.0004	24.0015	24.0016	24.0014	24.5629	24.5754	24.0021	24.002	24.0022	24.0021	24.0021	24.002	24.0022	24.0021	24.0021	24.0018	24.0021	24.0021	23.5945	467707	30.1761	0.45358	26.8027	24.0008	24.0017	24.0219
08/02 08:25:00	25.0667	582.73	24.0005	24.0016	24.0016	24.0014	24.565	24.5771	24.0021	24.0019	24.0021	24.0021	24.0021	24.0019	24.0021	24.0021	24.0021	24.0018	24.0021	24.0021	23.6415	470028	30.7213	0.45591	27.3163	24.0009	24.0017	24.0245
08/02 08:30:00	25.3	598.353	24.0005	24.0016	24.0016	24.0015	24.5669	24.5787	24.0021	24.0019	24.0021	24.0021	24.0021	24.0019	24.0021	24.0021	24.0021	24.0018	24.0022	24.0021	23.6887	472331	31.2671	0.458123	27.8306	24.001	24.0018	24.0271
08/02 08:35:00	25.5333	611.784	24.0005	24.0017	24.0017	24.0015	24.5689	24.5805	24.0021	24.0018	24.0021	24.0021	24.0021	24.0018	24.0021	24.0021	24.0021	24.0018	24.0022	24.0021	23.7355	474726	31.769	0.460273	28.3452	24.0011	24.0018	24.0297
08/02 08:40:00	25.7667	625.133	24.0005	24.0017	24.0017	24.0016	24.571	24.5823	24.0021	24.0018	24.0021	24.0021	24.0021	24.0018	24.0021	24.0021	24.0021	24.0018	24.0022	24.0021	23.7823	477232	32.2693	0.462409	28.8616	24.0012	24.0018	24.0322
08/02 08:45:00	26	638.394	24.0006	24.0017	24.0017	24.0016	24.573	24.5841	24.0021	24.0018	24.0021	24.0021	24.0021	24.0018	24.0021	24.0021	24.0021	24.0018	24.0022	24.0021	23.8286	479827	32.7679	0.464564	29.3794	24.0013	24.0018	24.0348
08/02 08:50:00	26.2333	651.56	24.0006	24.0017	24.0018	24.0017	24.5751	24.5859	24.0021	24.0018	24.0021	24.002	24.0021	24.0018	24.0021	24.002	24.0021	24.0018	24.0021	24.0021	23.8748	482475	33.2645	0.466762	29.8984	24.0013	24.0018	24.0374
08/02 08:55:00	26.4667	664.625	24.0006	24.0018	24.0018	24.0017	24.577	24.5876	24.0021	24.0018	24.002	24.002	24.0021	24.0018	24.002	24.002	24.0022	24.0018	24.0021	24.0021	23.9205	485147	33.7592	0.469021	30.4183	24.0014	24.0019	24.04
08/02 09:00:00	26.7	677.583	24.0006	24.0018	24.0018	24.0018	24.579	24.5894	24.002	24.0018	24.002	24.002	24.002	24.0017	24.002	24.002	24.0022	24.0018	24.0021	24.0021	23.9661	487821	34.2517	0.471354	30.9387	24.0015	24.0019	24.0426
08/02 09:05:00	26.7417	690.427	24.0006	24.0018	24.0018	24.0018	24.5808	24.5909	24.002	24.0017	24.002	24.002	24.002	24.0017	24.002	24.002	24.0021	24.0018	24.0021	24.0021	24.0085	489668	34.5502	0.473787	31.4593	24.0015	24.0019	24.0451
08/02 09:10:00	26.7833	703.151	24.0007	24.0018	24.0019	24.0018	24.5824	24.5924	24.002	24.0017	24.002	24.002	24.002	24.0017	24.002	24.002	24.0021	24.0018	24.0021	24.0021	24.0495	490608	34.8464	0.476224	31.9596	24.0016	24.0019	24.0475
08/02 09:15:00	26.825	715.749	24.0007	24.0018	24.0019	24.0019	24.584	24.5938	24.002	24.0017	24.002	24.002	24.002	24.0017	24.002	24.002	24.0021	24.0018	24.0021	24.0021	24.0896	490997	35.14	0.478547	32.4395	24.0017	24.0019	24.0499
08/02 09:20:00	26.8667	728.215	24.0007	24.0019	24.0019	24.0019	24.5855	24.5951	24.002	24.0017	24.002	24.0019	24.002	24.0017	24.002	24.0019	24.0021	24.0017	24.0021	24.002	24.1291	491003	35.431	0.480714	32.8985	24.0017	24.0019	24.0521
08/02 09:25:00	26.9083	740.542	24.0007	24.0019	24.0019	24.0019	24.587	24.5964	24.002	24.0017	24.0019	24.0019	24.002	24.0017	24.0019	24.0019	24.0021	24.0017	24.002	24.002	24.1679	490748	35.7192	0.482655	33.3364	24.0017	24.0019	24.0543
08/02 09:30:00	26.95	752.725	24.0007	24.0019	24.0019	24.0019	24.5885	24.5977	24.002	24.0017	24.0019	24.0019	24.002	24.0017	24.0019	24.0019	24.0021	24.0017	24.002	24.002	24.2061	490313	36.0045	0.484382	33.7529	24.0018	24.0019	24.0563
08/02 09:35:00	26.9917	762.518	24.0008	24.0019	24.0019	24.002	24.59	24.5991	24.002	24.0017	24.0019	24.0019	24.0019	24.0017	24.0019	24.0019	24.0021	24.0017	24.002	24.002	24.2438	489746	36.242	0.48588	34.1477	24.0018	24.0019	24.0583
08/02 09:40:00	27.0333	772.133	24.0008	24.0019	24.0019	24.002	24.5915	24.6004	24.0019	24.0017	24.0019	24.0019	24.0019	24.0017	24.0019	24.0019	24.002	24.0017	24.002	24.002	24.2808	489088	36.476	0.487132	34.5205	24.0018	24.0019	24.0601
08/02 09:45:00	27.075	781.565	24.0008	24.0019	24.0019	24.002	24.5929	24.6016	24.0019	24.0017	24.0019	24.0019	24.0019	24.0017	24.0019	24.0018	24.002	24.0017	24.002	24.0019	24.3171	488365	36.7063	0.48812	34.871	24.0018	24.0019	24.0619
08/02 09:50:00	27.1167	790.81	24.0008	24.0019	24.0019	24.002	24.5943	24.6029	24.0019	24.0017	24.0019	24.0018	24.0019	24.0016	24.0018	24.0018	24.002	24.0017	24.0019	24.0019	24.3525	487593	36.9329	0.488832	35.1992	24.0018	24.0019	24.0636
08/02 09:55:00	27.1583	799.862	24.0008	24.0019	24.0019	24.002	24.5957	24.6041	24.0019	24.0016	24.0018	24.0018	24.0019	24.0016	24.0018	24.0018	24.002	24.0017	24.0019	24.0019	24.3867	486783	37.1556	0.489258	35.5049	24.0019	24.0019	24.0652
08/02 10:00:00	27.2	808.717	24.0008	24.0019	24.0019	24.002	24.5971	24.6053	24.0019	24.0016	24.0018	24.0018	24.0019	24.0016	24.0018	24.0018	24.002	24.0017	24.0019	24.0019	24.4194	485942	37.3743	0.489394	35.788	24.0019	24.0019	24.0668
08/02 10:05:00	27.3417	817.369	24.0007	24.0017	24.0017	24.0018	24.6101	24.6183	24.0017	24.0015	24.0016	24.0016	24.0017	24.0015	24.0016	24.0016	24.0018	24.0015	24.0017	24.0017	24.4575	482706	37.689	0.489238	36.0482	24.0019	24.0017	24.0682
08/02 10:10:00	27.4833	825.815	24.0007	24.0016	24.0017	24.0017	24.6151	24.623	24.0016	24.0014	24.0016	24.0015	24.0016	24.0014	24.0016	24.0015	24.0017	24.0014	24.0016	24.0016	24.4914	482918	37.9996	0.488658	36.3098	24.0019	24.0016	24.0698
08/02 10:15:00	27.625	834.049	24.0007	24.0016	24.0016	24.0017	24.6162	24.6238	24.0016	24.0014	24.0015	24.0015	24.0016	24.0014	24.0015	24.0015	24.0017	24.0014	24.0016	24.0016	24.5228	483587	38.306	0.488017	36.5725	24.0019	24.0016	24.0713
08/02 10:20:00	27.7667	842.067	24.0007	24.0016	24.0016	24.0017	24.6162	24.6235	24.0015	24.0013	24.0015	24.0015	24.0015	24.0013	24.0015	24.0015	24.0016	24.0014	24.0016	24.0016	24.554	484589	38.608	0.487399	36.8364	24.0019	24.0016	24.0729
08/02 10:25:00	27.9083	849.865	24.0007	24.0016	24.0016	24.0017	24.616	24.6232	24.0015	24.0013	24.0015	24.0015	24.0015	24.0013	24.0015	24.0015	24.0016	24.0014	24.0016	24.0016	24.5857	485898	38.9056	0.486865	37.1011	24.0019	24.0016	24.0744
08/02 10:30:00	28.05	857.439	24.0007	24.0016	24.0016	24.0017	24.6161	24.6232	24.0015	24.0013	24.0015	24.0015	24.0015	24.0013	24.0015	24.0015	24.0016	24.0014	24.0015	24.0015	24.6182	487454	39.1988	0.486461	37.3667	24.0019	24.0016	24.0759
08/02 10:35:00	28.1917	863.563	24.0007	24.0016	24.0016	24.0017	24.6165	24.6236	24.0015	24.0013	24.0015	24.0015	24.0015	24.0013	24.0015	24.0015	24.0016	24.0014	24.0015	24.0015	24.6514	489183	39.4629	0.486222	37.6328	24.0019	24.0016	24.0774
08/02 10:40:00	28.3333	869.446	24.0007	24.0016	24.0016	24.0017	24.6171	24.6241	24.0015	24.0013	24.0015	24.0015	24.0015	24.0013	24.0015	24.0014	24.0016	24.0014	24.0015	24.0015	24.6852	491035	39.7223	0.486176	37.9013	24.0019	24.0016	24.0789
08/02 10:45:00	28.475	875.083	24.0007	24.0016	24.0016	24.0017	24.6179	24.6249	24.0015	24.0013	24.0015	24.0014	24.0015	24.0013	24.0014	24.0014	24.0015	24.0013	24.0015	24.0015	24.7194	492971	39.9767	0.486338	38.1718	24.0019	24.0016	24.0804
08/02 10:50:00	28.6167	880.473	24.0007	24.0016	24.0016	24.0017	24.6189	24.6258	24.0015	24.0013	24.0015	24.0014	24.0015	24.0013	24.0014	24.0014	24.0015	24.0013	24.0015	24.0015	24.7539	494962	40.2261	0.486722	38.4443	24.0019	24.0016	24.0818
08/02 10:55:00	28.7583	885.611	24.0007	24.0016	24.0016	24.0018	24.62	24.6268	24.0015	24.0013	24.0014	24.0014	24.0015	24.0013	24.0014	24.0014	24.0015	24.0013	24.0015	24.0015	24.7887	496991	40.4705	0.487336	38.7187	24.0019	24.0016	24.0832
08/02 11:00:00	28.9	890.495	24.0007	24.0016	24.0016	24.0018	24.6211	24.6278	24.0015	24.0013	24.0014	24.0014	24.0015	24.0013	24.0014	24.0014	24.0015	24.0013	24.0015	24.0015	24.8236	499042	40.7099	0.488186	38.995	24.0019	24.0016	24.0846
08/02 11:05:00	28.9	895.121	24.0003	24.0011	24.0012	24.0012	24.6469	24.6536	24.0012	24.001	24.0011	24.0011	24.0012	24.0011	24.0012	24.0012	24.0012	24.0011	24.0012	24.0012	24.8904	495322	40.8024	0.489278	39.273	24.0017	24.0012	24.0857
08/02 11:10:00	28.9	899.489	23.9895	24.0011	24.0011	24.0012	24.6573	24.6633	24.0011	24.0009	24.0011	24.0011	24.0011	24.0009	24.0011	24.0011	24.0011	24.001	24.0011	24.0011	24.9369	495316	40.8898	0.490329	39.5324	24.0016	24.0011	24.0869
08/02 11:15:00	28.9	903.594	23.9799	24.001	24.0011	24.0012	24.6593	24.6647	24.001	24.0009	24.001	24.001	24.001	24.0009	24.001	24.001	24.0011	24.0009	24.0011	24.0011	24.9728	494703	40.9719	0.491363	39.7733	24.0016	24.0011	24.0881
08/02 11:20:00	28.9	907.434	23.9718	24.001	24.0011	24.0011	24.6584	24.6634	24.001	24.0009	24.001	24.001	24.001	24.0009	24.001	24.001	24.001	24.0009	24.001	24.001	25.0046	493693	41.0487	0.492289	39.9954	24.0016	24.001	24.0891
08/02 11:25:00	28.9	911.008	23.9652	24.001	24.0011	24.0011	24.6569	24.6616	24.001	24.0008	24.001	24.001	24.001	24.0008	24.001	24.0009	24.001	24.0009	24.001	24.001	25.0353	492594	41.1202	0.493048	40.1988	24.0016	24.001	24.0901
08/02 11:30:00	28.9	914.313	23.9597	24.001	24.0011	24.0011	24.6555	24.6601	24.0009	24.0008	24.0009	24.0009	24.0009	24.0008	24.0009	24.0009	24.001	24.0008	24.001	24.001	25.0659	491518	41.1863	0.493605	40.3833	24.0016	24.001	24.0911
08/02 11:35:00	28.9	915.763	23.9554	24.001	24.001	24.0011	24.6545	24.6592	24.0009	24.0008	24.0009	24.0009	24.0009	24.0008	24.0009	24.0009	24.001	24.0008	24.001	24.001	25.0967	490488	41.2153	0.493944	40.549	24.0016	24.001	24.0919
08/02 11:40:00	28.9	916.94	23.9519	24.001	24.001	24.0011	24.654	24.6587	24.0009	24.0008	24.0009	24.0009	24.0009	24.0008	24.0009	24.0009	24.0009	24.0008	24.0009	24.0009	25.1278	489507	41.2388	0.494053	40.695	24.0016	24.001	24.0927
08/02 11:45:00	28.9	917.842	23.9491	24.001	24.001	24.0011	24.653	24.6577	24.0009	24.0009	24.0009	24.0009	24.0009	24.0008	24.0009	24.0009	24.0009	24.0009	24.0009	24.0009	25.1576	488701	41.2568	0.493926	40.8214	24.0016	24.001	24.0934
08/02 11:50:00	28.9	918.468	23.9469	24.001	24.001	24.0011	24.6527	24.6575	24.0009	24.0009	24.0009	24.0009	24.0009	24.0009	24.0009	24.0009	24.0009	24.0009	24.0009	24.0009	25.1879	487878	41.2694	0.49357	40.9281	24.0016	24.001	24.094
08/02 11:55:00	28.9	918.816	23.9452	24.001	24.001	24.0011	24.6534	24.6583	24.0009	24.0009	24.0009	24.0009	24.0009	24.0009	24.0009	24.0009	24.0009	24.0009	24.0009	24.0009	25.2193	487047	41.2763	0.492979	41.015	24.0016	24.001	24.0946
08/02 12:00:00	28.9	918.885	23.9439	24.001	24.001	24.0011	24.6543	24.6592	24.0009	24.0009	24.0009	24.0009	24.0009	24.0009	24.0009	24.0009	24.0009	24.0009	24.0009	24.0009	25.2508	486259	41.2777	0.492151	41.0821	24.0016	24.001	24.0951
08/02 12:05:00	28.9417	918.672	23.9998	24.0015	24.0015	24.0016	24.6294	24.6343	24.0011	24.0011	24.0011	24.0011	24.0011	24.0011	24.0011	24.0011	24.0011	24.0011	24.0011	24.0011	25.2327	490116	41.3151	0.491085	41.1295	24.0012	24.0014	24.0951
08/02 12:10:00	28.9833	918.178	24.0007	24.0016	24.0016	24.0017	24.6206	24.6264	24.0012	24.0012	24.0012	24.0012	24.0012	24.0012	24.0012	24.0012	24.0012	24.0012	24.0012	24.0012	25.2445	491221	41.3469	0.490652	41.1722	24.0011	24.0014	24.0953
08/02 12:15:00	29.025	917.401	24.0007	24.0016	24.0016	24.0017	24.6216	24.6281	24.0012	24.0012	24.0012	24.0012	24.0012	24.0012	24.0012	24.0011	24.0013	24.0013	24.0013	24.0012	25.2725	492718	41.373	0.49031	41.2103	24.0011	24.0015	24.0956
08/02 12:20:00	29.0667	916.34	24.0007	24.0016	24.0016	24.0018	24.6249	24.6317	24.0013	24.0013	24.0013	24.0012	24.0013	24.0013	24.0012	24.0012	24.0013	24.0013	24.0013	24.0012	25.3039	494601	41.3935	0.490145	41.2437	24.001	24.0015	24.0958
08/02 12:25:00	29.1083	914.995	24.0007	24.0016	24.0016	24.0018	24.6281	24.6349	24.0013	24.0013	24.0013	24.0012	24.0013	24.0013	24.0013	24.0012	24.0013	24.0013	24.0013	24.0012	25.3352	496563	41.4082	0.490221	41.2724	24.001	24.0015	24.0959
08/02 12:30:00	29.15	913.365	24.0007	24.0017	24.0016	24.0018	24.6309	24.6376	24.0013	24.0013	24.0013	24.0012	24.0013	24.0013	24.0013	24.0012	24.0013	24.0013	24.0013	24.0013	25.366	498462	41.4173	0.490551	41.2964	24.001	24.0015	24.096
08/02 12:35:00	29.1917	909.857	24.0007	24.0017	24.0016	24.0018	24.6333	24.6399	24.0013	24.0013	24.0013	24.0013	24.0013	24.0013	24.0013	24.0013	24.0014	24.0014	24.0014	24.0013	25.3963	500297	41.3888	0.49113	41.3157	24.001	24.0015	24.096
08/02 12:40:00	29.2333	906.076	24.0007	24.0017	24.0016	24.0018	24.6355	24.642	24.0013	24.0013	24.0013	24.0013	24.0013	24.0013	24.0013	24.0013	24.0014	24.0014	24.0014	24.0014	25.426	502081	41.3548	0.491947	41.3302	24.001	24.0015	24.0959
08/02 12:45:00	29.275	902.024	24.0007	24.0017	24.0016	24.0018	24.6375	24.6438	24.0013	24.0013	24.0013	24.0013	24.0013	24.0013	24.0013	24.0013	24.0014	24.0014	24.0014	24.0014	25.4553	503829	41.3155	0.492995	41.3398	24.001	24.0015	24.0958
08/02 12:50:00	29.3167	897.704	24.0007	24.0017	24.0016	24.0018	24.6394	24.6455	24.0013	24.0014	24.0014	24.0014	24.0013	24.0013	24.0013	24.0014	24.0014	24.0014	24.0014	24.0014	25.484	505554	41.2707	0.494256	41.3447	24.001	24.0016	24.0956
08/02 12:55:00	29.3583	893.118	24.0007	24.0017	24.0016	24.0018	24.6411	24.6471	24.0013	24.0014	24.0014	24.0014	24.0013	24.0014	24.0014	24.0014	24.0014	24.0014	24.0014	24.0014	25.5123	507257	41.2207	0.495729	41.3448	24.001	24.0016	24.0954
08/02 13:00:00	29.4	888.269	24.0007	24.0017	24.0016	24.0018	24.6428	24.6487	24.0014	24.0014	24.0014	24.0014	24.0013	24.0014	24.0014	24.0014	24.0014	24.0014	24.0014	24.0015	25.5399	508946	41.1654	0.497413	41.3402	24.001	24.0016	24.0951
08/02 13:05:00	29.4	883.159	24.001	24.0019	24.0019	24.002	24.6319	24.6377	24.0015	24.0015	24.0015	24.0016	24.0015	24.0015	24.0015	24.0016	24.0015	24.0015	24.0016	24.0016	25.5368	514239	41.0632	0.499304	41.3308	24.0014	24.0018	24.0952
08/02 13:10:00	29.4	877.792	24.001	24.002	24.0019	24.0021	24.6298	24.6359	24.0016	24.0016	24.0016	24.0017	24.0016	24.0016	24.0016	24.0016	24.0016	24.0016	24.0017	24.0017	25.5532	516421	40.9558	0.501314	41.3098	24.0014	24.0018	24.0948
08/02 13:15:00	29.4	872.17	24.001	24.002	24.0019	24.0021	24.6318	24.6379	24.0016	24.0016	24.0016	24.0017	24.0016	24.0016	24.0016	24.0017	24.0017	24.0017	24.0017	24.0017	25.5764	518318	40.8434	0.503414	41.2772	24.0015	24.0018	24.0943
08/02 13:20:00	29.4	866.296	24.001	24.002	24.0019	24.0021	24.6348	24.6409	24.0016	24.0016	24.0016	24.0017	24.0016	24.0016	24.0016	24.0017	24.0017	24.0017	24.0017	24.0018	25.6007	519997	40.7259	0.505547	41.2331	24.0015	24.0018	24.0938
08/02 13:25:00	29.4	860.173	24.001	24.002	24.0019	24.0021	24.6377	24.6437	24.0016	24.0017	24.0017	24.0017	24.0016	24.0016	24.0016	24.0017	24.0017	24.0017	24.0017	24.0018	25.6249	521459	40.6035	0.507664	41.1775	24.0015	24.0018	24.0932
08/02 13:30:00	29.4	853.806	24.001	24.002	24.0019	24.002	24.6404	24.6462	24.0016	24.0017	24.0017	24.0018	24.0016	24.0016	24.0017	24.0017	24.0017	24.0017	24.0017	24.0018	25.6484	522749	40.4761	0.509738	41.1104	24.0015	24.0018	24.0925
08/02 13:35:00	29.4	845.51	24.001	24.002	24.0019	24.002	24.6427	24.6484	24.0016	24.0017	24.0017	24.0018	24.0016	24.0016	24.0017	24.0017	24.0017	24.0017	24.0017	24.0018	25.6713	523899	40.3102	0.511762	41.032	24.0015	24.0018	24.0918
08/02 13:40:00	29.4	836.995	24.001	24.002	24.0019	24.002	24.6449	24.6504	24.0016	24.0017	24.0017	24.0018	24.0016	24.0016	24.0017	24.0017	24.0017	24.0017	24.0017	24.0018	25.6934	524948	40.1399	0.513729	40.9421	24.0015	24.0018	24.091
08/02 13:45:00	29.4	828.266	24.001	24.0019	24.0019	24.002	24.6468	24.6522	24.0016	24.0017	24.0017	24.0018	24.0016	24.0016	24.0017	24.0017	24.0017	24.0017	24.0017	24.0018	25.7149	525923	39.9653	0.515635	40.8409	24.0015	24.0018	24.0902
08/02 13:50:00	29.4	819.329	24.001	24.0019	24.0019	24.002	24.6486	24.6538	24.0016	24.0017	24.0017	24.0018	24.0016	24.0016	24.0017	24.0017	24.0017	24.0017	24.0017	24.0018	25.7355	526843	39.7866	0.517476	40.7283	24.0016	24.0018	24.0893
08/02 13:55:00	29.4	810.189	24.001	24.0019	24.0019	24.002	24.6503	24.6554	24.0016	24.0017	24.0017	24.0018	24.0016	24.0016	24.0017	24.0017	24.0017	24.0017	24.0017	24.0018	25.7555	527721	39.6038	0.51925	40.6047	24.0016	24.0018	24.0883
08/02 14:00:00	29.4	800.85	24.001	24.0019	24.0019	24.002	24.6519	24.6568	24.0016	24.0017	24.0017	24.0018	24.0016	24.0016	24.0017	24.0017	24.0017	24.0017	24.0017	24.0018	25.7747	528566	39.417	0.520955	40.4699	24.0016	24.0018	24.0873
08/02 14:05:00	29.4	791.318	24.001	24.0019	24.0019	24.002	24.6535	24.6583	24.0016	24.0017	24.0017	24.0018	24.0016	24.0017	24.0017	24.0017	24.0017	24.0017	24.0017	24.0018	25.7933	529273	39.2264	0.52259	40.3242	24.0018	24.0018	24.0865
08/02 14:10:00	29.4	781.599	24.001	24.0019	24.0019	24.0019	24.655	24.6597	24.0016	24.0017	24.0017	24.0018	24.0016	24.0017	24.0017	24.0017	24.0017	24.0017	24.0017	24.0018	25.8111	529836	39.032	0.523843	40.1712	24.0018	24.0018	24.0855
08/02 14:15:00	29.4	771.698	24.001	24.0019	24.0019	24.0019	24.6565	24.6611	24.0016	24.0017	24.0017	24.0018	24.0016	24.0017	24.0017	24.0017	24.0017	24.0017	24.0017	24.0018	25.8283	530314	38.834	0.524961	40.0108	24.0018	24.0018	24.0845
08/02 14:20:00	29.4	761.62	24.001	24.0019	24.0019	24.0019	24.658	24.6625	24.0016	24.0017	24.0017	24.0018	24.0016	24.0017	24.0017	24.0017	24.0017	24.0017	24.0017	24.0018	25.8447	530731	38.6324	0.525961	39.8434	24.0018	24.0018	24.0834
08/02 14:25:00	29.4	751.371	24.001	24.0019	24.0018	24.0019	24.6594	24.6638	24.0016	24.0017	24.0017	24.0017	24.0016	24.0017	24.0017	24.0017	24.0017	24.0017	24.0017	24.0018	25.8606	531102	38.4274	0.526855	39.6689	24.0018	24.0018	24.0823
08/02 14:30:00	29.4	740.957	24.001	24.0019	24.0018	24.0019	24.6609	24.6652	24.0016	24.0017	24.0017	24.0017	24.0016	24.0017	24.0017	24.0017	24.0017	24.0017	24.0017	24.0018	25.8757	531440	38.2191	0.527659	39.4876	24.0018	24.0018	24.0812
08/02 14:35:00	29.4	728.426	24.001	24.0019	24.0018	24.0019	24.6624	24.6666	24.0016	24.0017	24.0017	24.0017	24.0016	24.0017	24.0017	24.0017	24.0017	24.0017	24.0017	24.0017	25.8905	531737	37.9685	0.528383	39.2995	24.0018	24.0018	24.0801
08/02 14:40:00	29.4	715.778	24.001	24.0019	24.0018	24.0019	24.6638	24.6679	24.0016	24.0017	24.0017	24.0017	24.0016	24.0017	24.0017	24.0017	24.0017	24.0017	24.0017	24.0017	25.9045	532003	37.7156	0.529036	39.1044	24.0018	24.0018	24.0789
08/02 14:45:00	29.4	703.02	24.001	24.0019	24.0018	24.0019	24.6653	24.6693	24.0016	24.0017	24.0017	24.0017	24.0016	24.0017	24.0017	24.0017	24.0017	24.0017	24.0017	24.0017	25.9181	532245	37.4604	0.529624	38.9023	24.0018	24.0018	24.0777
08/02 14:50:00	29.4	690.159	24.001	24.0019	24.0018	24.0019	24.6667	24.6706	24.0016	24.0017	24.0017	24.0017	24.0016	24.0016	24.0017	24.0017	24.0017	24.0017	24.0017	24.0017	25.9311	532465	37.2032	0.530151	38.6936	24.0018	24.0018	24.0765
08/02 14:55:00	29.4	677.201	24.001	24.0018	24.0018	24.0019	24.6681	24.6719	24.0016	24.0017	24.0017	24.0017	24.0016	24.0016	24.0017	24.0017	24.0017	24.0017	24.0017	24.0017	25.9437	532664	36.944	0.530619	38.4783	24.0018	24.0018	24.0752
08/02 15:00:00	29.4	664.156	24.001	24.0018	24.0018	24.0019	24.6695	24.6732	24.0016	24.0017	24.0017	24.0017	24.0016	24.0016	24.0017	24.0017	24.0017	24.0017	24.0017	24.0017	25.9557	532844	36.6831	0.531031	38.2567	24.0018	24.0018	24.0739
08/02 15:05:00	29.4	651.029	24.001	24.0018	24.0018	24.0019	24.6708	24.6745	24.0016	24.0017	24.0017	24.0017	24.0016	24.0016	24.0017	24.0017	24.0016	24.0017	24.0017	24.0017	25.9673	533237	36.4206	0.531388	38.0288	24.0018	24.0018	24.0726
08/02 15:10:00	29.4	637.827	24.001	24.0018	24.0018	24.0018	24.6721	24.6757	24.0016	24.0016	24.0017	24.0017	24.0016	24.0016	24.0016	24.0017	24.0016	24.0017	24.0017	24.0017	25.9781	533890	36.1565	0.531718	37.795	24.0018	24.0018	24.0713
08/02 15:15:00	29.4	624.559	24.001	24.0018	24.0018	24.0018	24.6734	24.6769	24.0016	24.0016	24.0017	24.0017	24.0016	24.0016	24.0016	24.0016	24.0016	24.0017	24.0017	24.0017	25.9887	534632	35.8912	0.532056	37.5554	24.0018	24.0018	24.0699
08/02 15:20:00	29.4	611.231	24.001	24.0018	24.0018	24.0018	24.6747	24.6782	24.0016	24.0016	24.0017	24.0017	24.0016	24.0016	24.0016	24.0016	24.0016	24.0017	24.0017	24.0017	25.9989	535446	35.6246	0.532416	37.3102	24.0018	24.0018	24.0685
08/02 15:25:00	29.4	597.85	24.001	24.0018	24.0018	24.0018	24.676	24.6794	24.0016	24.0016	24.0017	24.0017	24.0016	24.0016	24.0016	24.0016	24.0016	24.0016	24.0017	24.0017	26.0088	536304	35.357	0.532809	37.0595	24.0018	24.0018	24.0671
08/02 15:30:00	29.4	584.424	24.001	24.0018	24.0018	24.0018	24.6774	24.6807	24.0016	24.0016	24.0016	24.0016	24.0016	24.0016	24.0016	24.0016	24.0016	24.0016	24.0017	24.0017	26.0182	537185	35.0885	0.533242	36.8037	24.0018	24.0018	24.0656
08/02 15:35:00	29.4	568.565	24.001	24.0018	24.0018	24.0018	24.6788	24.6821	24.0016	24.0016	24.0016	24.0016	24.0016	24.0016	24.0016	24.0016	24.0016	24.0016	24.0017	24.0017	26.0279	537992	34.7713	0.533721	36.5428	24.0018	24.0017	24.0641
08/02 15:40:00	29.4	552.754	24.001	24.0018	24.0018	24.0018	24.6802	24.6834	24.0016	24.0016	24.0016	24.0016	24.0016	24.0016	24.0016	24.0016	24.0016	24.0016	24.0016	24.0016	26.037	538813	34.4551	0.534242	36.2763	24.0018	24.0017	24.0625
08/02 15:45:00	29.4	536.998	24.001	24.0018	24.0018	24.0018	24.6815	24.6846	24.0016	24.0016	24.0016	24.0016	24.0016	24.0016	24.0016	24.0016	24.0016	24.0016	24.0016	24.0016	26.0456	539639	34.14	0.53481	36.0046	24.0018	24.0017	24.061
08/02 15:50:00	29.4	521.306	24.001	24.0018	24.0018	24.0018	24.6823	24.6852	24.0016	24.0016	24.0016	24.0016	24.0016	24.0016	24.0016	24.0016	24.0017	24.0016	24.0017	24.0016	26.0515	540800	33.8261	0.535426	35.7279	24.0018	24.0018	24.0593
08/02 15:55:00	29.4	505.687	24.001	24.0018	24.0018	24.0018	24.6832	24.6861	24.0017	24.0016	24.0016	24.0016	24.0017	24.0016	24.0016	24.0016	24.0017	24.0016	24.0017	24.0017	26.0572	542007	33.5137	0.536121	35.4465	24.0018	24.0018	24.0577
08/02 16:00:00	29.4	490.149	24.001	24.0018	24.0018	24.0018	24.6847	24.6876	24.0017	24.0016	24.0016	24.0016	24.0017	24.0016	24.0016	24.0016	24.0017	24.0017	24.0017	24.0017	26.0638	543040	33.203	0.536899	35.1606	24.0018	24.0018	24.056
08/02 16:05:00	29.3583	474.701	24.001	24.0018	24.0018	24.0018	24.6863	24.6891	24.0017	24.0016	24.0017	24.0017	24.0017	24.0016	24.0016	24.0016	24.0017	24.0017	24.0017	24.0017	26.07	543766	32.8523	0.537749	34.8706	24.0018	24.0018	24.0543
08/02 16:10:00	29.3167	459.35	24.001	24.0018	24.0018	24.0018	24.688	24.6907	24.0017	24.0016	24.0017	24.0016	24.0017	24.0016	24.0016	24.0016	24.0017	24.0017	24.0017	24.0017	26.0763	544100	32.5037	0.538626	34.5733	24.0018	24.0018	24.0525
08/02 16:15:00	29.275	444.105	24.001	24.0018	24.0018	24.0018	24.6895	24.6921	24.0017	24.0017	24.0017	24.0016	24.0017	24.0016	24.0016	24.0016	24.0017	24.0017	24.0017	24.0017	26.0819	544297	32.1571	0.539477	34.2689	24.0018	24.0018	24.0507
08/02 16:20:00	29.2333	428.973	24.001	24.0018	24.0018	24.0018	24.6909	24.6935	24.0017	24.0017	24.0017	24.0016	24.0017	24.0016	24.0016	24.0016	24.0017	24.0017	24.0017	24.0017	26.0871	544351	31.8128	0.540282	33.9577	24.0018	24.0017	24.0489
08/02 16:25:00	29.1917	413.962	24.001	24.0018	24.0018	24.0018	24.6922	24.6947	24.0017	24.0017	24.0017	24.0016	24.0017	24.0016	24.0017	24.0016	24.0017	24.0017	24.0017	24.0016	26.0919	544312	31.4709	0.541024	33.64	24.0018	24.0017	24.047
08/02 16:30:00	29.15	399.081	24.001	24.0018	24.0018	24.0018	24.6935	24.696	24.0017	24.0017	24.0017	24.0016	24.0017	24.0016	24.0017	24.0016	24.0017	24.0017	24.0017	24.0016	26.0963	544207	31.1316	0.541692	33.3162	24.0018	24.0017	24.0451
08/02 16:35:00	29.1083	380.979	24.001	24.0018	24.0018	24.0018	24.6948	24.6972	24.0017	24.0017	24.0017	24.0016	24.0016	24.0016	24.0017	24.0016	24.0017	24.0017	24.0017	24.0016	26.1006	544031	30.7279	0.542277	32.9865	24.0017	24.0017	24.0432
08/02 16:40:00	29.0667	363.204	24.001	24.0018	24.0017	24.0017	24.696	24.6984	24.0017	24.0017	24.0017	24.0016	24.0016	24.0016	24.0017	24.0016	24.0017	24.0017	24.0017	24.0016	26.1042	543833	30.3308	0.54278	32.6495	24.0017	24.0017	24.0413
08/02 16:45:00	29.025	345.767	24.001	24.0018	24.0017	24.0017	24.6972	24.6996	24.0017	24.0017	24.0017	24.0016	24.0016	24.0016	24.0017	24.0016	24.0017	24.0017	24.0017	24.0016	26.1075	543618	29.9403	0.543199	32.3058	24.0017	24.0017	24.0394
08/02 16:50:00	28.9833	328.674	24.001	24.0018	24.0017	24.0017	24.6984	24.7007	24.0017	24.0017	24.0017	24.0016	24.0016	24.0016	24.0017	24.0016	24.0017	24.0017	24.0017	24.0016	26.1102	543384	29.5568	0.54353	31.9559	24.0018	24.0017	24.0374
08/02 16:55:00	28.9417	311.935	24.001	24.0017	24.0017	24.0017	24.6995	24.7018	24.0017	24.0017	24.0017	24.0016	24.0016	24.0016	24.0017	24.0016	24.0017	24.0017	24.0017	24.0016	26.1127	543134	29.1804	0.543745	31.6001	24.0018	24.0017	24.0354
08/02 17:00:00	28.9	295.558	24.001	24.0017	24.0017	24.0017	24.7007	24.7029	24.0017	24.0017	24.0017	24.0016	24.0016	24.0016	24.0017	24.0016	24.0017	24.0017	24.0017	24.0016	26.1146	542869	28.8112	0.543839	31.239	24.0018	24.0017	24.0334
08/02 17:05:00	28.7583	279.551	24.0005	24.0012	24.0012	24.0012	24.7366	24.7385	24.0013	24.0013	24.0013	24.0012	24.0013	24.0013	24.0013	24.0013	24.0013	24.0013	24.0013	24.0012	26.2177	530987	28.3494	0.543825	30.873	24.0018	24.0012	24.0314
08/02 17:10:00	28.6167	263.921	24.0005	24.0011	24.0011	24.0011	24.7496	24.7503	24.0011	24.0011	24.0011	24.001	24.0011	24.0011	24.0011	24.001	24.001	24.001	24.0011	24.0009	26.2506	528095	27.8951	0.54276	30.4977	24.0018	24.0011	24.0295
08/02 17:15:00	28.475	248.674	24.0005	24.001	24.001	24.001	24.7515	24.7513	24.001	24.001	24.0011	24.0009	24.001	24.001	24.0011	24.0009	24.001	24.001	24.001	24.0009	26.2599	526014	27.4485	0.541426	30.1137	24.0018	24.001	24.0276
08/02 17:20:00	28.3333	233.818	24.0005	24.001	24.001	24.001	24.7501	24.7495	24.001	24.001	24.001	24.0009	24.001	24.001	24.001	24.0009	24.001	24.001	24.001	24.0009	26.2622	524204	27.0097	0.539903	29.7213	24.0017	24.001	24.0257
08/02 17:25:00	28.1917	219.359	24.0005	24.001	24.001	24.001	24.7481	24.7474	24.001	24.001	24.001	24.0009	24.001	24.001	24.001	24.0009	24.001	24.0009	24.001	24.0009	26.2623	522689	26.5789	0.538224	29.321	24.0017	24.001	24.0237
08/02 17:30:00	28.05	205.302	24.0005	24.001	24.001	24.0009	24.7466	24.7459	24.001	24.001	24.001	24.0009	24.001	24.001	24.001	24.0009	24.0009	24.0009	24.001	24.0009	26.2613	521425	26.156	0.536422	28.9134	24.0017	24.001	24.0218
08/02 17:35:00	27.9083	187.795	24.0005	24.0009	24.0009	24.0009	24.7457	24.745	24.001	24.001	24.001	24.0009	24.001	24.001	24.001	24.0009	24.0009	24.0009	24.001	24.0009	26.2601	520323	25.6642	0.534524	28.4987	24.0017	24.0009	24.0198
08/02 17:40:00	27.7667	171.111	24.0005	24.0009	24.0009	24.0009	24.7453	24.7448	24.001	24.001	24.001	24.0009	24.001	24.001	24.001	24.0009	24.0009	24.0009	24.001	24.0009	26.2583	519340	25.1889	0.532548	28.0768	24.0017	24.0009	24.0178
08/02 17:45:00	27.625	155.257	24.0005	24.0009	24.0009	24.0009	24.7452	24.7448	24.001	24.001	24.001	24.0009	24.001	24.001	24.001	24.0009	24.0009	24.0009	24.001	24.0009	26.2561	518439	24.7301	0.530507	27.6483	24.0017	24.0009	24.0157
08/02 17:50:00	27.4833	140.237	24.0005	24.0009	24.0009	24.0009	24.7453	24.7451	24.0009	24.001	24.001	24.0009	24.001	24.001	24.001	24.0009	24.0009	24.0009	24.001	24.0009	26.2531	517585	24.2881	0.528409	27.2141	24.0017	24.0009	24.0137
08/02 17:55:00	27.3417	126.056	24.0005	24.0009	24.0009	24.0009	24.7459	24.7458	24.0009	24.0009	24.001	24.0009	24.0009	24.001	24.001	24.0009	24.0009	24.0009	24.001	24.0009	26.2504	516704	23.8628	0.526259	26.775	24.0017	24.0009	24.0116
08/02 18:00:00	27.2	112.716	24.0005	24.0009	24.0009	24.0008	24.7464	24.7464	24.0009	24.0009	24.001	24.0009	24.0009	24.0009	24.001	24.0009	24.0009	24.0009	24.001	24.0009	26.2467	515861	23.4543	0.524056	26.3319	24.0017	24.0009	24.0095
08/02 18:05:00	27.1083	100.221	23.9323	24.0006	24.0006	24.0007	24.7893	24.7884	24.0009	24.0009	24.0009	24.001	24.0009	24.0009	24.0009	24.001	24.001	24.001	24.001	24.001	26.3632	510299	23.1128	0.521805	25.8855	24.0012	24.0007	24.0069
08/02 18:10:00	27.0167	88.5716	23.8701	24.0005	24.0006	24.0006	24.8097	24.8069	24.001	24.001	24.001	24.0011	24.001	24.001	24.001	24.0011	24.001	24.001	24.001	24.0011	26.4017	506342	22.7881	0.520081	25.4491	24.0011	24.0007	24.0046
08/02 18:15:00	26.925	77.769	23.8257	24.0005	24.0005	24.0005	24.8171	24.8125	24.001	24.0011	24.0011	24.0012	24.001	24.0011	24.0011	24.0012	24.001	24.0011	24.0011	24.0011	26.409	503303	22.4804	0.518269	25.0235	24.001	24.0007	24.0025
08/02 18:20:00	26.8333	67.8132	23.7928	24.0005	24.0005	24.0005	24.8191	24.8133	24.0011	24.0011	24.0011	24.0012	24.0011	24.0011	24.0011	24.0013	24.0011	24.0011	24.0011	24.0012	26.4057	500868	22.1896	0.516376	24.6095	24.001	24.0007	24.0005
08/02 18:25:00	26.7417	58.7035	23.7676	24.0004	24.0005	24.0004	24.8191	24.8126	24.0011	24.0012	24.0011	24.0013	24.0011	24.0012	24.0012	24.0013	24.0011	24.0012	24.0012	24.0012	26.3985	498811	21.9157	0.514432	24.2078	24.001	24.0007	23.9986
08/02 18:30:00	26.65	50.4383	23.7477	24.0004	24.0004	24.0004	24.8184	24.8115	24.0011	24.0012	24.0012	24.0013	24.0012	24.0012	24.0012	24.0013	24.0012	24.0012	24.0012	24.0013	26.3889	496989	21.6588	0.512442	23.8193	24.001	24.0007	23.9967
08/02 18:35:00	26.5583	44.097	23.7313	24.0004	24.0004	24.0004	24.8176	24.8105	24.0011	24.0012	24.0012	24.0013	24.0012	24.0013	24.0013	24.0013	24.0012	24.0013	24.0013	24.0013	26.3776	495324	21.4403	0.510405	23.4445	24.0009	24.0007	23.995
08/02 18:40:00	26.4667	38.1502	23.7175	24.0004	24.0004	24.0003	24.8168	24.8098	24.0012	24.0012	24.0012	24.0013	24.0012	24.0013	24.0013	24.0014	24.0012	24.0013	24.0013	24.0013	26.3652	491477	21.2297	0.508322	23.0925	24.0009	24.0007	23.9934
08/02 18:45:00	26.375	32.5966	23.7054	24.0004	24.0004	24.0003	24.8145	24.8075	24.0012	24.0013	24.0013	24.0015	24.0012	24.0013	24.0013	24.0015	24.0013	24.0013	24.0013	24.0015	26.3465	486183	21.0269	0.506	22.7625	24.0009	24.0007	23.9919
08/02 18:50:00	26.2833	27.4346	23.6947	24.0004	24.0004	24.0001	24.8126	24.8059	24.0012	24.0013	24.0012	24.0016	24.0012	24.0013	24.0013	24.0016	24.001	24.001	24.001	24.0011	26.3283	489205	20.832	0.503312	22.4539	24.0009	24.0007	23.9906
08/02 18:55:00	26.1917	22.6622	23.6849	24.0004	24.0003	24.0001	24.8115	24.8051	24.0012	24.0013	24.0012	24.0016	24.0012	24.0013	24.0013	24.0016	24.001	24.0011	24.001	24.0011	26.3112	489369	20.6449	0.500947	22.1659	24.0009	24.0006	23.9894
08/02 19:00:00	26.1	18.2772	23.6759	24.0003	24.0003	24.0001	24.8109	24.8047	24.0012	24.0013	24.0012	24.0015	24.0012	24.0013	24.0013	24.0015	24.0011	24.0011	24.0011	24.0012	26.2941	488000	20.4655	0.498669	21.8978	24.0009	24.0006	23.9882
08/02 19:05:00	25.9583	12.0305	23.6675	24.0003	24.0003	24.0001	24.8124	24.8065	24.0012	24.0013	24.0012	24.0013	24.0012	24.0013	24.0012	24.0013	24.0011	24.0011	24.0011	24.0011	26.2801	481569	20.1989	0.496348	21.6487	24.0007	24.0006	23.9871
08/02 19:10:00	25.8167	0	23.6596	24.0003	24.0003	24.0001	24.8142	24.8084	24.0012	24.0012	24.0011	24.0012	24.0012	24.0013	24.0012	24.0012	24.0011	24.0012	24.0011	24.0011	26.2645	471046	19.8167	0.493953	21.4059	24.0007	24.0006	23.9861
08/02 19:15:00	25.675	0	23.6521	24.0003	24.0003	24.0001	24.8149	24.8092	24.0012	24.0012	24.0011	24.0012	24.0012	24.0013	24.0012	24.0012	24.0011	24.0012	24.0011	24.0011	26.2449	460847	19.675	0.491012	21.1583	24.0007	24.0006	23.9852
08/02 19:20:00	25.5333	0	23.645	24.0003	24.0003	24.0001	24.8149	24.8092	24.0012	24.0012	24.0011	24.0012	24.0012	24.0013	24.0012	24.0012	24.0011	24.0012	24.0011	24.0011	26.2223	451987	19.5333	0.487474	20.9245	24.0007	24.0006	23.9844
08/02 19:25:00	25.3917	0	23.6381	24.0003	24.0003	24.0001	24.8146	24.8091	24.0012	24.0013	24.0011	24.0012	24.0012	24.0013	24.0012	24.0012	24.0012	24.0012	24.0011	24.0012	26.198	444346	19.3917	0.483401	20.7031	24.0007	24.0006	23.9838
08/02 19:30:00	25.25	0	23.6314	24.0003	24.0003	24.0001	24.8141	24.8088	24.0012	24.0013	24.0011	24.0012	24.0012	24.0013	24.0012	24.0013	24.0012	24.0012	24.0011	24.0012	26.1721	437091	19.25	0.478862	20.4928	24.0007	24.0006	23.9833
08/02 19:35:00	25.1083	0	23.625	24.0003	24.0003	24.0001	24.8136	24.8085	24.0012	24.0013	24.0011	24.0012	24.0013	24.0013	24.0012	24.0013	24.0012	24.0012	24.0012	24.0012	26.145	430658	19.1083	0.47387	20.2921	24.0007	24.0006	23.983
08/02 19:40:00	24.9667	0	23.6187	24.0003	24.0002	24.0001	24.8131	24.8082	24.0012	24.0013	24.0011	24.0012	24.0013	24.0013	24.0012	24.0013	24.0012	24.0013	24.0012	24.0012	26.1167	424935	18.9667	0.468482	20.0978	24.0007	24.0006	23.9827
08/02 19:45:00	24.825	0	23.6126	23.9984	24.0002	24.0001	24.8123	24.8078	24.0012	24.0013	24.0011	24.0012	24.0013	24.0013	24.0012	24.0013	24.0012	24.0013	24.0012	24.0013	26.0874	419724	18.825	0.462936	19.9092	24.0007	24.0006	23.9826
08/02 19:50:00	24.6833	0	23.6066	23.9941	24.0002	24.0001	24.8111	24.8074	24.0011	24.0012	24.001	24.0011	24.0011	24.0012	24.0011	24.0011	24.0012	24.0013	24.0012	24.0013	26.057	471671	18.6833	0.457398	19.7257	24.0007	24.0004	23.9824
08/02 19:55:00	24.5417	0	23.6008	23.9887	24.0001	24.0001	24.8095	24.807	24.0011	24.0012	24.001	24.0011	24.0011	24.0012	24.0011	24.0011	24.0013	24.0013	24.0012	24.0013	26.0258	479022	18.5417	0.455937	19.5466	24.0006	24.0005	23.9816
08/02 20:00:00	24.4	0	23.595	23.9827	24.0001	24.0001	24.8077	24.8066	24.0011	24.0012	24.001	24.0011	24.0012	24.0012	24.0011	24.0012	24.0013	24.0013	24.0012	24.0013	25.9936	479671	18.4	0.455075	19.3713	24.0006	24.0005	23.9808
08/02 20:05:00	24.3083	0	23.5675	23.957	24.0001	24.0001	24.8066	24.8094	24.0011	24.0012	24.001	24.0011	24.0011	24.0012	24.0011	24.0012	24.0013	24.0013	24.0012	24.0013	25.9703	479694	18.3083	0.454381	19.1992	24.0006	24.0004	23.9799
08/02 20:10:00	24.2167	0	23.5479	23.9375	24.0001	24.0001	24.8042	24.8111	24.0011	24.0012	24.001	24.0012	24.0012	24.0012	24.0011	24.0012	24.0013	24.0013	24.0012	24.0013	25.9437	479494	18.2167	0.454224	19.0417	24.0006	24.0005	23.9791
08/02 20:15:00	24.125	0	23.5334	23.9228	24.0001	24.0001	24.8011	24.812	24.0011	24.0012	24.001	24.0012	24.0012	24.0013	24.0011	24.0013	24.0013	24.0013	24.0012	24.0014	25.9149	479114	18.125	0.454928	18.9083	24.0006	24.0005	23.9782
08/02 20:20:00	24.0333	0	23.5219	23.9109	23.9983	24.0001	24.7977	24.8121	24.0011	24.0012	24.001	24.0012	24.0012	24.0013	24.0011	24.0013	24.0013	24.0014	24.0013	24.0014	25.885	478620	18.0333	0.456451	18.7792	24.0006	23.9992	23.9773
08/02 20:25:00	23.9417	0	23.5125	23.9007	23.9938	24.0001	24.7944	24.8116	24.0012	24.0012	24.0011	24.0012	24.0012	24.0013	24.0012	24.0013	24.0013	24.0014	24.0013	24.0014	25.8544	478052	17.9417	0.45867	18.6542	24.0006	23.9961	23.9762
08/02 20:30:00	23.85	0	23.5044	23.8916	23.9881	24.0001	24.7911	24.8106	24.0012	24.0012	24.0011	24.0012	24.0012	24.0013	24.0012	24.0013	24.0013	24.0014	24.0013	24.0014	25.8232	477430	17.85	0.461479	18.5333	24.0006	23.9921	23.9751
08/02 20:35:00	23.7583	0	23.497	23.8832	23.9817	24.0001	24.7879	24.8092	24.0012	24.0012	24.0011	24.0013	24.0012	24.0013	24.0012	24.0013	24.0013	24.0014	24.0013	24.0014	25.7914	476769	17.7583	0.46484	18.4167	24.0006	23.9877	23.974
08/02 20:40:00	23.6667	0	23.4902	23.8753	23.975	24.0001	24.7848	24.8075	24.0012	24.0012	24.0011	24.0013	24.0012	24.0013	24.0012	24.0013	24.0013	24.0014	24.0013	24.0014	25.7592	476081	17.6667	0.468683	18.3042	24.0006	23.983	23.9728
08/02 20:45:00	23.575	0	23.4838	23.8678	23.968	24.0001	24.7818	24.8056	24.0012	24.0012	24.0011	24.0013	24.0012	24.0013	24.0012	24.0014	24.0013	24.0014	24.0013	24.0014	25.7266	475372	17.575	0.472945	18.1958	24.0006	23.9782	23.9715
08/02 20:50:00	23.4833	0	23.4777	23.8606	23.961	24.0001	24.7788	24.8035	24.0012	24.0012	24.0011	24.0013	24.0012	24.0013	24.0012	24.0014	24.0013	24.0014	24.0013	24.0014	25.6935	474825	17.4833	0.477583	18.0917	24.0004	23.9733	23.9701
08/02 20:55:00	23.3917	0	23.4717	23.8537	23.9539	24.0001	24.7759	24.8013	24.0012	24.0004	24.0011	24.0013	24.0012	24.0013	24.0012	24.0014	24.0013	24.0014	24.0013	24.0014	25.6601	474101	17.3917	0.477845	17.9917	24.0005	23.9684	23.9696
08/02 21:00:00	23.3	0	23.4659	23.8469	23.9468	24.0001	24.773	24.7991	24.0012	23.9922	24.0011	24.0013	24.0012	24.0013	24.0012	24.0014	24.0013	24.0014	24.0013	24.0014	25.6262	473362	17.3	0.477435	17.8958	24.0005	23.9635	23.9691
08/02 21:05:00	23.3	0	23.4614	23.8416	23.9412	24.1208	24.7723	24.8027	24.0382	23.9851	24.0072	24.064	24.0955	24.047	24.0729	24.1534	24.212	24.1815	24.1966	24.2476	25.6531	466470	17.3	0.476909	17.8042	24.0004	23.9869	23.9687
08/02 21:10:00	23.3	0	23.4545	23.8333	23.9323	24.2322	24.7715	24.8084	24.0642	23.9738	24.0075	24.1071	24.1659	24.0759	24.1248	24.2608	24.3708	24.3103	24.3435	24.4203	25.6715	454295	17.3	0.475807	17.7201	24.0005	24.0002	23.9684
08/02 21:15:00	23.3	0	23.4489	23.8268	23.9252	24.2753	24.7703	24.8114	24.0688	23.9643	24.0026	24.1157	24.1849	24.0789	24.1366	24.289	24.4196	24.346	24.3877	24.4688	25.6691	447832	17.3	0.473708	17.6438	24.0005	24	23.9683
08/02 21:20:00	23.3	0	23.4434	23.8204	23.9183	24.2991	24.7688	24.8131	24.0678	23.9547	23.996	24.1161	24.1914	24.0755	24.1384	24.2989	24.4425	24.3607	24.4075	24.4895	25.6596	445003	17.3	0.471101	17.575	23.9992	23.9964	23.967
08/02 21:25:00	23.3	0	23.438	23.8142	23.9116	24.312	24.7669	24.8135	24.0641	23.945	23.9886	24.1128	24.1918	24.0692	24.1354	24.3003	24.4531	24.3657	24.4156	24.4976	25.6455	443677	17.3	0.468299	17.5139	23.9961	23.9912	23.9641
08/02 21:30:00	23.3	0	23.4326	23.8082	23.9051	24.3185	24.7647	24.813	24.059	23.9354	23.9808	24.1075	24.189	24.0615	24.1298	24.2974	24.4573	24.3656	24.4177	24.4993	25.6285	443011	17.3	0.465435	17.4604	23.9921	23.9853	23.9602
08/02 21:35:00	23.3	0	23.4272	23.8022	23.8986	24.321	24.7622	24.8118	24.053	23.9258	23.9728	24.1011	24.1845	24.0529	24.1229	24.2921	24.4579	24.3629	24.4163	24.4975	25.6093	442652	17.3	0.462566	17.4146	23.9877	23.9789	23.956
08/02 21:40:00	23.3	0	23.4219	23.7963	23.8922	24.3209	24.7596	24.8101	24.0466	23.9162	23.9646	24.0941	24.1789	24.0438	24.1152	24.2855	24.4562	24.3583	24.4129	24.4934	25.5885	442447	17.3	0.459723	17.3764	23.983	23.9723	23.9516
08/02 21:45:00	23.3	0	23.4166	23.7905	23.8859	24.319	24.7569	24.8079	24.0399	23.9067	23.9565	24.0868	24.1726	24.0344	24.107	24.278	24.453	24.3526	24.408	24.4879	25.5667	442325	17.3	0.456921	17.3458	23.9782	23.9655	23.947
08/02 21:50:00	23.3	0	23.4113	23.7848	23.8795	24.3159	24.754	24.8055	24.033	23.8971	23.9483	24.0791	24.1659	24.0248	24.0984	24.2699	24.4487	24.3459	24.4021	24.4812	25.544	442250	17.3	0.454167	17.3229	23.9733	23.9586	23.9424
08/02 21:55:00	23.3	0	23.4061	23.779	23.8732	24.3119	24.7511	24.8028	24.0258	23.8876	23.94	24.0712	24.1588	24.015	24.0896	24.2613	24.4435	24.3385	24.3954	24.4736	25.5206	442202	17.3	0.451452	17.3076	23.9684	23.9517	23.9379
08/02 22:00:00	23.3	0	23.4009	23.7733	23.8669	24.3072	24.7481	24.7999	24.0186	23.8781	23.9318	24.0631	24.1515	24.0051	24.0807	24.2523	24.4375	24.3305	24.388	24.4653	25.4967	442172	17.3	0.448794	17.3	23.9635	23.9447	23.9333
08/02 22:05:00	23.2583	0	23.3957	23.7677	23.8606	24.3019	24.7448	24.7967	24.0103	23.8677	23.9227	24.0539	24.143	23.9941	24.0707	24.2421	24.4299	24.3209	24.3791	24.4553	25.4697	442036	17.2583	0.446195	17.3	23.9869	23.9373	23.957
08/02 22:10:00	23.2167	0	23.3906	23.762	23.8543	24.2961	24.7413	24.7933	24.0015	23.8568	23.9132	24.0442	24.1338	23.9826	24.0601	24.2311	24.4213	24.3103	24.3692	24.4443	25.4412	441779	17.2167	0.444158	17.2965	24.0002	23.9298	23.9706
08/02 22:15:00	23.175	0	23.3854	23.7564	23.848	24.2899	24.7377	24.7896	23.9924	23.8459	23.9035	24.0342	24.1243	23.9708	24.0493	24.2198	24.412	24.2992	24.3587	24.4326	25.4116	441464	17.175	0.443115	17.2896	24	23.9221	23.9705
08/02 22:20:00	23.1333	0	23.3803	23.7508	23.8417	24.2833	24.7339	24.7857	23.9832	23.8348	23.8936	24.024	24.1145	23.9588	24.0382	24.2082	24.402	24.2875	24.3477	24.4204	25.3814	441116	17.1333	0.442585	17.2792	23.9964	23.9144	23.967
08/02 22:25:00	23.0917	0	23.3752	23.7452	23.8355	24.2763	24.7301	24.7817	23.9738	23.8237	23.8837	24.0136	24.1045	23.9467	24.0271	24.1963	24.3916	24.2753	24.3362	24.4076	25.3508	440748	17.0917	0.442261	17.2653	23.9912	23.9066	23.9618
08/02 22:30:00	23.05	0	23.3701	23.7396	23.8292	24.269	24.7261	24.7776	23.9643	23.8125	23.8738	24.0031	24.0943	23.9346	24.0158	24.1843	24.3807	24.2627	24.3244	24.3943	25.3198	440366	17.05	0.442017	17.2479	23.9853	23.8988	23.9558
08/02 22:35:00	23.0083	0	23.3651	23.7341	23.8229	24.2614	24.7222	24.7735	23.9547	23.8013	23.8638	23.9925	24.084	23.9223	24.0044	24.1721	24.3694	24.2498	24.3121	24.3806	25.2885	439972	17.0083	0.441796	17.2271	23.9789	23.891	23.9494
08/02 22:40:00	22.9667	0	23.36	23.7285	23.8166	24.2536	24.7181	24.7692	23.945	23.7901	23.8537	23.9818	24.0736	23.9099	23.993	24.1597	24.3577	24.2364	24.2995	24.3665	25.257	439569	16.9667	0.441573	17.2028	23.9723	23.8831	23.9427
08/02 22:45:00	22.925	0	23.355	23.723	23.8103	24.2454	24.714	24.7649	23.9353	23.7789	23.8437	23.971	24.0631	23.8975	23.9814	24.1472	24.3457	24.2228	24.2866	24.3521	25.2253	439157	16.925	0.441333	17.175	23.9655	23.8752	23.9358
08/02 22:50:00	22.8833	0	23.35	23.7175	23.8041	24.2371	24.7099	24.7606	23.9255	23.7676	23.8336	23.9601	24.0524	23.8851	23.9699	24.1346	24.3333	24.2089	24.2734	24.3374	25.1936	438738	16.8833	0.441069	17.1438	23.9586	23.8673	23.9288
08/02 22:55:00	22.8417	0	23.345	23.7119	23.7978	24.2285	24.7058	24.7562	23.9156	23.7564	23.8235	23.9491	24.0417	23.8726	23.9583	24.1219	24.3207	24.1947	24.2599	24.3224	25.1617	438312	16.8417	0.440777	17.109	23.9517	23.8594	23.9217
08/02 23:00:00	22.8	0	23.34	23.7064	23.7915	24.2197	24.7016	24.7517	23.9057	23.7451	23.8134	23.938	24.0309	23.86	23.9466	24.1091	24.3077	24.1803	24.2462	24.307	25.1298	437878	16.8	0.440452	17.0708	23.9447	23.8515	23.9146
08/02 23:05:00	22.75	0	23.3351	23.7009	23.7853	24.2108	24.6973	24.7472	23.8956	23.7336	23.8031	23.9267	24.0199	23.8472	23.9348	24.0959	24.2943	24.1654	24.232	24.2912	25.0973	437068	16.75	0.440095	17.0292	23.9373	23.8434	23.907
08/02 23:10:00	22.7	0	23.3301	23.6954	23.779	24.2016	24.693	24.7426	23.8853	23.7221	23.7927	23.9153	24.0086	23.8342	23.9228	24.0826	24.2805	24.1501	24.2175	24.275	25.0646	435848	16.7	0.439681	16.9868	23.9298	23.8354	23.8993
08/02 23:15:00	22.65	0	23.3252	23.6899	23.7728	24.1923	24.6886	24.7379	23.8749	23.7104	23.7822	23.9036	23.9972	23.8211	23.9107	24.0691	24.2664	24.1346	24.2027	24.2586	25.0318	434443	16.65	0.439186	16.9437	23.9221	23.8273	23.8916
08/02 23:20:00	22.6	0	23.3202	23.6844	23.7666	24.1829	24.6842	24.7332	23.8644	23.6986	23.7716	23.8919	23.9857	23.808	23.8985	24.0555	24.2521	24.1189	24.1878	24.2419	24.9989	432943	16.6	0.438601	16.9	23.9144	23.8191	23.8837
08/02 23:25:00	22.55	0	23.3153	23.6789	23.7604	24.1733	24.6797	24.7285	23.8539	23.6869	23.761	23.88	23.9741	23.7948	23.8862	24.0418	24.2375	24.1029	24.1726	24.225	24.966	431394	16.55	0.43792	16.8556	23.9066	23.811	23.8758
08/02 23:30:00	22.5	0	23.3104	23.6735	23.7542	24.1635	24.6752	24.7237	23.8432	23.6751	23.7503	23.8681	23.9625	23.7815	23.874	24.028	24.2227	24.0868	24.1572	24.2078	24.9332	429816	16.5	0.437141	16.8104	23.8988	23.8028	23.8679
08/02 23:35:00	22.45	0	23.3055	23.668	23.7479	24.1537	24.6706	24.7188	23.8326	23.6632	23.7396	23.8562	23.9508	23.7682	23.8616	24.0142	24.2078	24.0705	24.1417	24.1905	24.9004	428224	16.45	0.436262	16.7646	23.891	23.7947	23.86
08/02 23:40:00	22.4	0	23.3006	23.6625	23.7418	24.1437	24.6661	24.714	23.8219	23.6514	23.7289	23.8442	23.939	23.7549	23.8493	24.0003	24.1927	24.0541	24.126	24.1731	24.8677	426623	16.4	0.435283	16.7181	23.8831	23.7865	23.852
08/02 23:45:00	22.35	0	23.2958	23.6571	23.7356	24.1336	24.6615	24.7091	23.8111	23.6395	23.7182	23.8321	23.9272	23.7416	23.8369	23.9863	24.1774	24.0375	24.1102	24.1555	24.8351	425018	16.35	0.434204	16.6708	23.8752	23.7783	23.8441
08/02 23:50:00	22.3	0	23.2909	23.6516	23.7294	24.1234	24.6569	24.7042	23.8004	23.6277	23.7075	23.82	23.9153	23.7282	23.8246	23.9723	24.162	24.0208	24.0943	24.1377	24.8026	423411	16.3	0.433025	16.6229	23.8673	23.7702	23.8361
08/02 23:55:00	22.25	0	23.286	23.6461	23.7232	24.113	24.6522	24.6992	23.7896	23.6158	23.6967	23.8079	23.9035	23.7149	23.8122	23.9583	24.1464	24.004	24.0783	24.1198	24.7702	421806	16.25	0.431748	16.5743	23.8594	23.762	23.8281
08/02 24:00:00	22.2	0	23.2812	23.6407	23.717	24.1026	24.6476	24.6942	23.7788	23.604	23.686	23.7957	23.8915	23.7015	23.7998	23.9443	24.1307	23.987	24.0621	24.1018	24.7379	420202	16.2	0.430373	16.525	23.8515	23.7538	23.8201
08/03 00:05:00	22.1583	0	23.2764	23.6352	23.7109	24.0921	24.6429	24.6893	23.768	23.5921	23.6752	23.7835	23.8797	23.6882	23.7874	23.9303	24.115	23.9701	24.046	24.0838	24.7063	418946	16.1583	0.4289	16.475	23.8434	23.7457	23.8121
08/03 00:10:00	22.1167	0	23.2715	23.6298	23.7047	24.0815	24.6383	24.6843	23.7572	23.5803	23.6645	23.7713	23.8678	23.6749	23.7751	23.9163	24.0993	23.9531	24.0297	24.0657	24.675	418069	16.1167	0.427389	16.4257	23.8354	23.7375	23.804
08/03 00:15:00	22.075	0	23.2667	23.6244	23.6986	24.0709	24.6336	24.6794	23.7464	23.5684	23.6538	23.7591	23.8559	23.6616	23.7628	23.9022	24.0834	23.936	24.0134	24.0476	24.6441	417361	16.075	0.425908	16.3771	23.8273	23.7294	23.7958
08/03 00:20:00	22.0333	0	23.2619	23.6189	23.6925	24.0601	24.629	24.6744	23.7356	23.5566	23.6432	23.7468	23.8441	23.6483	23.7504	23.8882	24.0675	23.9188	23.997	24.0293	24.6133	416737	16.0333	0.424484	16.3292	23.8191	23.7212	23.7877
08/03 00:25:00	21.9917	0	23.2571	23.6135	23.6864	24.0494	24.6243	24.6695	23.7249	23.5447	23.6325	23.7345	23.8322	23.635	23.7381	23.8741	24.0514	23.9016	23.9806	24.011	24.5828	416157	15.9917	0.423134	16.2819	23.811	23.7131	23.7795
08/03 00:30:00	21.95	0	23.2523	23.6081	23.6802	24.0385	24.6196	24.6645	23.7141	23.5328	23.6218	23.7222	23.8202	23.6217	23.7258	23.8601	24.0353	23.8843	23.9641	23.9926	24.5525	415602	15.95	0.421864	16.2354	23.8028	23.705	23.7713
08/03 00:35:00	21.9083	0	23.2475	23.6026	23.6741	24.0276	24.6149	24.6595	23.7032	23.521	23.6111	23.7098	23.8083	23.6084	23.7134	23.846	24.0192	23.8669	23.9475	23.9742	24.5223	415058	15.9083	0.42068	16.1896	23.7947	23.6968	23.7631
08/03 00:40:00	21.8667	0	23.2427	23.5972	23.6681	24.0166	24.6102	24.6544	23.6924	23.5091	23.6003	23.6975	23.7964	23.595	23.7011	23.8319	24.0029	23.8495	23.9309	23.9556	24.4923	414520	15.8667	0.419582	16.1444	23.7865	23.6887	23.7549
08/03 00:45:00	21.825	0	23.2379	23.5918	23.662	24.0056	24.6055	24.6494	23.6815	23.4972	23.5895	23.6851	23.7844	23.5817	23.6888	23.8178	23.9866	23.8321	23.9144	23.9371	24.4625	413984	15.825	0.418574	16.1	23.7783	23.6806	23.7466
08/03 00:50:00	21.7833	0	23.2331	23.5864	23.6559	23.9945	24.6007	24.6444	23.6706	23.4854	23.5787	23.6727	23.7724	23.5684	23.6765	23.8037	23.9702	23.8145	23.8977	23.9184	24.4329	413447	15.7833	0.417654	16.0562	23.7702	23.6725	23.7384
08/03 00:55:00	21.7417	0	23.2284	23.581	23.6498	23.9834	24.596	24.6393	23.6596	23.4735	23.5679	23.6603	23.7605	23.5551	23.6642	23.7895	23.9538	23.797	23.8809	23.8997	24.4034	412908	15.7417	0.416824	16.0132	23.762	23.6644	23.7301
08/03 01:00:00	21.7	0	23.2236	23.5756	23.6438	23.9722	24.5912	24.6342	23.6487	23.4617	23.5571	23.6479	23.7485	23.5418	23.6518	23.7754	23.9373	23.7793	23.8641	23.881	24.3741	412366	15.7	0.416083	15.9708	23.7538	23.6563	23.7218
08/03 01:05:00	21.7	0	23.2189	23.5702	23.6377	23.961	24.5866	24.6293	23.6386	23.4514	23.5473	23.6365	23.7374	23.5292	23.6405	23.7623	23.9217	23.7621	23.8482	23.8633	24.3475	411991	15.7	0.41543	15.9292	23.7457	23.6485	23.7136
08/03 01:10:00	21.7	0	23.2143	23.5648	23.6317	23.9498	24.5822	24.6246	23.6291	23.4414	23.5379	23.6255	23.7269	23.5173	23.6296	23.7497	23.9066	23.7455	23.8326	23.846	24.3224	411802	15.7	0.41485	15.891	23.7375	23.6408	23.7053
08/03 01:15:00	21.7	0	23.2096	23.5594	23.6256	23.9385	24.5779	24.62	23.6199	23.4315	23.5289	23.6149	23.7166	23.5057	23.619	23.7374	23.8916	23.7294	23.8174	23.8289	24.2982	411697	15.7	0.414328	15.8562	23.7294	23.6332	23.6971
08/03 01:20:00	21.7	0	23.205	23.554	23.6196	23.9272	24.5737	24.6154	23.6108	23.4218	23.52	23.6044	23.7065	23.4943	23.6087	23.7252	23.8768	23.7134	23.8023	23.812	24.2745	411635	15.7	0.413856	15.825	23.7212	23.6258	23.6889
08/03 01:25:00	21.7	0	23.2004	23.5487	23.6136	23.9159	24.5695	24.6109	23.6019	23.4122	23.5113	23.594	23.6965	23.4831	23.5984	23.7131	23.8622	23.6976	23.7873	23.7952	24.2513	411597	15.7	0.413431	15.7972	23.7131	23.6183	23.6807
08/03 01:30:00	21.7	0	23.1958	23.5433	23.6076	23.9046	24.5653	24.6064	23.5931	23.4027	23.5027	23.5838	23.6866	23.4719	23.5883	23.7012	23.8476	23.6819	23.7724	23.7785	24.2285	411573	15.7	0.413051	15.7729	23.705	23.6109	23.6725
08/03 01:35:00	21.7	0	23.1912	23.538	23.6017	23.8933	24.5612	24.602	23.5844	23.3933	23.4942	23.5736	23.6768	23.4609	23.5782	23.6893	23.8331	23.6663	23.7576	23.7619	24.206	411558	15.7	0.412715	15.7521	23.6968	23.6036	23.6643
08/03 01:40:00	21.7	0	23.1866	23.5326	23.5957	23.882	24.5571	24.5975	23.5757	23.3839	23.4858	23.5635	23.667	23.45	23.5683	23.6776	23.8186	23.6508	23.7429	23.7453	24.1838	411548	15.7	0.412423	15.7347	23.6887	23.5962	23.6562
08/03 01:45:00	21.7	0	23.1821	23.5273	23.5898	23.8707	24.553	24.5931	23.5672	23.3746	23.4774	23.5535	23.6573	23.4391	23.5584	23.6658	23.8042	23.6354	23.7282	23.7288	24.1618	411542	15.7	0.412176	15.7208	23.6806	23.589	23.648
08/03 01:50:00	21.7	0	23.1776	23.522	23.5839	23.8594	24.5489	24.5887	23.5587	23.3654	23.4691	23.5436	23.6477	23.4284	23.5485	23.6542	23.7898	23.62	23.7136	23.7124	24.1402	411538	15.7	0.411972	15.7104	23.6725	23.5817	23.6399
08/03 01:55:00	21.7	0	23.173	23.5167	23.578	23.8481	24.5448	24.5843	23.5502	23.3563	23.4609	23.5337	23.6382	23.4176	23.5388	23.6426	23.7755	23.6047	23.699	23.696	24.1187	411535	15.7	0.411813	15.7035	23.6644	23.5745	23.6318
08/03 02:00:00	21.7	0	23.1685	23.5115	23.5721	23.8368	24.5407	24.5798	23.5418	23.3472	23.4527	23.5239	23.6287	23.407	23.5291	23.6311	23.7612	23.5894	23.6845	23.6797	24.0976	411533	15.7	0.411699	15.7	23.6563	23.5673	23.6237
08/03 02:05:00	21.65	0	23.1641	23.5062	23.5662	23.8256	24.5364	24.5752	23.5325	23.3371	23.4436	23.513	23.6182	23.3953	23.5184	23.6186	23.746	23.573	23.6691	23.6623	24.0735	410096	15.65	0.411629	15.7	23.6485	23.5598	23.6159
08/03 02:10:00	21.6	0	23.1596	23.5009	23.5603	23.8143	24.5318	24.5703	23.5226	23.3265	23.4339	23.5017	23.6072	23.3831	23.5073	23.6056	23.7303	23.5562	23.6532	23.6445	24.048	407100	15.6	0.411471	15.6958	23.6408	23.5522	23.6083
08/03 02:15:00	21.55	0	23.1551	23.4957	23.5545	23.8029	24.5272	24.5653	23.5125	23.3156	23.424	23.4902	23.5961	23.3707	23.4959	23.5924	23.7143	23.5392	23.6371	23.6265	24.0219	403431	15.55	0.411079	15.6875	23.6332	23.5445	23.6008
08/03 02:20:00	21.5	0	23.1507	23.4905	23.5487	23.7916	24.5224	24.5603	23.5023	23.3046	23.4139	23.4785	23.5848	23.3582	23.4845	23.5791	23.6981	23.522	23.6207	23.6083	23.9955	399447	15.5	0.410391	15.675	23.6258	23.5368	23.5933
08/03 02:25:00	21.45	0	23.1462	23.4852	23.5428	23.7802	24.5176	24.5551	23.492	23.2936	23.4038	23.4668	23.5734	23.3457	23.4729	23.5657	23.6819	23.5046	23.6042	23.59	23.9689	395321	15.45	0.409375	15.6583	23.6183	23.5291	23.586
08/03 02:30:00	21.4	0	23.1418	23.48	23.537	23.7688	24.5127	24.5499	23.4815	23.2825	23.3935	23.455	23.5619	23.333	23.4613	23.5523	23.6656	23.4872	23.5875	23.5716	23.9422	391140	15.4	0.408018	15.6375	23.6109	23.5213	23.5787
08/03 02:35:00	21.35	0	23.1374	23.4748	23.5312	23.7573	24.5078	24.5447	23.4711	23.2713	23.3832	23.4432	23.5505	23.3204	23.4497	23.5389	23.6492	23.4697	23.5708	23.5532	23.9155	386953	15.35	0.406316	15.6125	23.6036	23.5136	23.5715
08/03 02:40:00	21.3	0	23.133	23.4695	23.5254	23.7458	24.5028	24.5394	23.4605	23.2601	23.3728	23.4313	23.539	23.3077	23.438	23.5254	23.6327	23.4522	23.554	23.5347	23.8888	382787	15.3	0.404265	15.5833	23.5962	23.5058	23.5643
08/03 02:45:00	21.25	0	23.1286	23.4643	23.5195	23.7342	24.4978	24.5341	23.45	23.2489	23.3625	23.4194	23.5275	23.295	23.4262	23.5119	23.6161	23.4346	23.5372	23.5161	23.8621	378656	15.25	0.401869	15.55	23.589	23.498	23.5572
08/03 02:50:00	21.2	0	23.1243	23.4591	23.5137	23.7226	24.4928	24.5288	23.4394	23.2377	23.352	23.4075	23.516	23.2822	23.4145	23.4984	23.5995	23.4169	23.5203	23.4975	23.8354	374572	15.2	0.399128	15.5125	23.5817	23.4903	23.5502
08/03 02:55:00	21.15	0	23.1199	23.4539	23.5079	23.7109	24.4878	24.5235	23.4288	23.2264	23.3416	23.3956	23.5044	23.2695	23.4027	23.4848	23.5828	23.3992	23.5033	23.4789	23.8087	370539	15.15	0.396048	15.4708	23.5745	23.4825	23.5433
08/03 03:00:00	21.1	0	23.1156	23.4486	23.5021	23.6992	24.4827	24.5181	23.4182	23.2152	23.3311	23.3836	23.4928	23.2567	23.3908	23.4713	23.566	23.3814	23.4862	23.4602	23.7821	366560	15.1	0.392631	15.425	23.5673	23.4747	23.5363
08/03 03:05:00	21.15	0	23.1112	23.4434	23.4963	23.6875	24.4782	24.5133	23.4098	23.2062	23.323	23.3739	23.4833	23.2463	23.3812	23.4601	23.5513	23.366	23.4715	23.4438	23.7618	363786	15.15	0.388883	15.375	23.5598	23.4676	23.5292
08/03 03:10:00	21.2	0	23.1069	23.4382	23.4905	23.6757	24.474	24.5088	23.4025	23.1984	23.316	23.3653	23.4747	23.237	23.3726	23.4499	23.5375	23.3516	23.4577	23.4284	23.7446	362295	15.2	0.385024	15.3333	23.5522	23.4609	23.5219
08/03 03:15:00	21.25	0	23.1026	23.433	23.4848	23.6639	24.4701	24.5045	23.3959	23.1912	23.3096	23.3573	23.4667	23.2283	23.3646	23.4402	23.5244	23.3377	23.4445	23.4136	23.7293	361375	15.25	0.381291	15.3	23.5445	23.4543	23.5147
08/03 03:20:00	21.3	0	23.0983	23.4278	23.479	23.6522	24.4663	24.5005	23.3896	23.1843	23.3037	23.3496	23.4592	23.2199	23.357	23.4309	23.5116	23.3244	23.4317	23.3991	23.7151	360742	15.3	0.377786	15.275	23.5368	23.4478	23.5074
08/03 03:25:00	21.35	0	23.094	23.4227	23.4733	23.6407	24.4627	24.4965	23.3837	23.1779	23.2981	23.3424	23.452	23.2119	23.3498	23.422	23.4994	23.3114	23.4194	23.3852	23.7019	360261	15.35	0.37456	15.2583	23.5291	23.4415	23.5
08/03 03:30:00	21.4	0	23.0898	23.4176	23.4677	23.6292	24.4593	24.4927	23.378	23.1717	23.2927	23.3354	23.4451	23.2042	23.3429	23.4133	23.4874	23.2988	23.4073	23.3715	23.6895	359866	15.4	0.371639	15.25	23.5213	23.4353	23.4927
08/03 03:35:00	21.45	0	23.0855	23.4125	23.462	23.6178	24.4559	24.489	23.3725	23.1656	23.2875	23.3285	23.4383	23.1966	23.3362	23.4048	23.4756	23.2863	23.3954	23.358	23.6775	359519	15.45	0.369033	15.25	23.5136	23.4292	23.4854
08/03 03:40:00	21.5	0	23.0813	23.4074	23.4564	23.6064	24.4525	24.4853	23.367	23.1598	23.2824	23.3218	23.4317	23.1892	23.3296	23.3964	23.464	23.2739	23.3837	23.3445	23.666	359199	15.5	0.366747	15.2583	23.5058	23.4231	23.478
08/03 03:45:00	21.55	0	23.077	23.4024	23.4508	23.5951	24.4492	24.4816	23.3617	23.1541	23.2774	23.3153	23.4252	23.1819	23.3231	23.3882	23.4525	23.2618	23.3721	23.3314	23.6549	358891	15.55	0.364781	15.275	23.498	23.4171	23.4707
08/03 03:50:00	21.6	0	23.0728	23.3974	23.4452	23.5838	24.4459	24.478	23.3565	23.1485	23.2726	23.3089	23.4188	23.1748	23.3169	23.3801	23.4412	23.2498	23.3608	23.3183	23.6442	358588	15.6	0.363134	15.3	23.4903	23.4111	23.4633
08/03 03:55:00	21.65	0	23.0686	23.3923	23.4396	23.5725	24.4427	24.4744	23.3514	23.143	23.2678	23.3027	23.4126	23.1677	23.3107	23.3721	23.4301	23.238	23.3496	23.3054	23.6338	358283	15.65	0.361802	15.3333	23.4825	23.4052	23.456
08/03 04:00:00	21.7	0	23.0644	23.3873	23.434	23.5613	24.4394	24.4708	23.3465	23.1372	23.2632	23.2965	23.4064	23.1612	23.3047	23.3642	23.419	23.2269	23.3386	23.2926	23.6238	357974	15.7	0.36078	15.375	23.4747	23.3993	23.4486
08/03 04:05:00	21.7	0	23.0602	23.3823	23.4285	23.5501	24.436	24.4669	23.3405	23.1304	23.2576	23.2892	23.3993	23.1534	23.2976	23.3553	23.4069	23.2146	23.3265	23.2788	23.6109	358565	15.7	0.360065	15.425	23.4676	23.3932	23.4419
08/03 04:10:00	21.7	0	23.056	23.3777	23.4233	23.5393	24.4323	24.4629	23.334	23.1232	23.2514	23.2814	23.3917	23.145	23.29	23.3459	23.3944	23.2016	23.314	23.2645	23.5968	360154	15.7	0.35963	15.4708	23.4609	23.3871	23.4354
08/03 04:15:00	21.7	0	23.0519	23.3729	23.418	23.5284	24.4285	24.4588	23.3273	23.1158	23.245	23.2734	23.3838	23.1364	23.2822	23.3363	23.3817	23.1883	23.3013	23.2501	23.582	362209	15.7	0.359451	15.5125	23.4543	23.3808	23.4291
08/03 04:20:00	21.7	0	23.0477	23.3681	23.4126	23.5175	24.4247	24.4546	23.3204	23.1084	23.2384	23.2653	23.3758	23.1276	23.2742	23.3266	23.3689	23.1749	23.2884	23.2356	23.5669	364516	15.7	0.359521	15.55	23.4478	23.3745	23.4229
08/03 04:25:00	21.7	0	23.0435	23.3632	23.4071	23.5064	24.4207	24.4504	23.3135	23.1008	23.2317	23.2571	23.3678	23.1188	23.2662	23.3169	23.356	23.1615	23.2755	23.221	23.5517	366973	15.7	0.359835	15.5833	23.4415	23.3682	23.4167
08/03 04:30:00	21.7	0	23.0394	23.3584	23.4017	23.4954	24.4168	24.446	23.3065	23.0932	23.225	23.2488	23.3597	23.11	23.2581	23.3071	23.3431	23.148	23.2626	23.2065	23.5365	369530	15.7	0.360395	15.6125	23.4353	23.3618	23.4106
08/03 04:35:00	21.7	0	23.0353	23.3535	23.3963	23.4844	24.4128	24.4417	23.2995	23.0857	23.2182	23.2405	23.3516	23.1011	23.2501	23.2973	23.3302	23.1344	23.2496	23.1919	23.5213	372158	15.7	0.3612	15.6375	23.4292	23.3554	23.4045
08/03 04:40:00	21.7	0	23.0311	23.3486	23.3908	23.4733	24.4087	24.4373	23.2924	23.078	23.2114	23.2322	23.3435	23.0923	23.242	23.2876	23.3173	23.1209	23.2366	23.1773	23.5061	374839	15.7	0.362253	15.6583	23.4231	23.349	23.3984
08/03 04:45:00	21.7	0	23.027	23.3437	23.3854	23.4623	24.4047	24.4329	23.2853	23.0704	23.2046	23.2239	23.3354	23.0834	23.2339	23.2778	23.3043	23.1074	23.2237	23.1628	23.491	377562	15.7	0.363557	15.675	23.4171	23.3426	23.3923
08/03 04:50:00	21.7	0	23.0229	23.3388	23.3799	23.4512	24.4006	24.4285	23.2782	23.0628	23.1978	23.2156	23.3273	23.0746	23.2258	23.268	23.2914	23.0939	23.2107	23.1482	23.4761	380322	15.7	0.365113	15.6875	23.4111	23.3362	23.3862
08/03 04:55:00	21.7	18.887	23.0188	23.3339	23.3745	23.44	24.3969	24.4245	23.2848	23.1933	23.233	23.2221	23.3331	23.204	23.2598	23.2732	23.2922	23.2178	23.2398	23.1485	23.4615	383113	16.0777	0.366924	15.6958	23.4052	23.344	23.38
08/03 05:00:00	21.7	23.2787	23.0147	23.3297	23.3698	23.4295	24.3954	24.4229	23.2959	23.3559	23.2811	23.2329	23.3433	23.3647	23.3069	23.2826	23.2975	23.3734	23.2819	23.153	23.4498	385933	16.1656	0.368993	15.7315	23.3993	23.356	23.3741
08/03 05:05:00	21.7917	27.9472	23.0106	23.3266	23.3662	23.4202	24.3967	24.4239	23.3091	23.5129	23.3272	23.2454	23.3556	23.5186	23.3516	23.2937	23.3049	23.5225	23.3216	23.1592	23.4461	389021	16.3506	0.371323	15.7703	23.3932	23.3684	23.3678
08/03 05:10:00	21.8833	32.8942	23.0065	23.3245	23.3635	23.4118	24.3996	24.4267	23.324	23.6711	23.3715	23.2594	23.3695	23.674	23.3944	23.3062	23.3139	23.6732	23.3596	23.1668	23.4472	392409	16.5412	0.373861	15.8245	23.3871	23.3815	23.3616
08/03 05:15:00	21.975	38.1213	23.0025	23.3232	23.3617	23.4044	24.4039	24.4307	23.3402	23.8339	23.4144	23.2745	23.3848	23.8342	23.4362	23.3199	23.3244	23.8289	23.3966	23.1757	23.4513	395955	16.7374	0.376549	15.8946	23.3808	23.3958	23.3554
08/03 05:20:00	22.0667	43.6298	22.9985	23.3228	23.3607	23.3978	24.4091	24.4356	23.3578	23.9969	23.4588	23.2907	23.4014	23.9968	23.4796	23.3348	23.3363	23.9919	23.4352	23.1858	23.4577	399671	16.9393	0.379361	15.981	23.3745	23.411	23.3491
08/03 05:25:00	22.1583	49.4205	22.9945	23.3225	23.3599	23.3917	24.4142	24.4405	23.3762	24.0016	23.4977	23.3073	23.4189	24.0015	23.5179	23.3501	23.3492	24.0014	23.4687	23.1964	23.4667	405683	17.1467	0.38229	16.0843	23.3682	23.4169	23.3429
08/03 05:30:00	22.25	55.4943	22.9905	23.3231	23.3598	23.3864	24.4187	24.4445	23.3962	24.0019	23.5321	23.3254	23.4381	24.0019	23.5519	23.3669	23.3639	24.0019	23.498	23.2087	23.4763	413249	17.3599	0.385516	16.2049	23.3618	23.423	23.3367
08/03 05:35:00	22.3417	64.1532	22.9865	23.3242	23.3604	23.3818	24.4234	24.4489	23.419	24.0016	23.5668	23.3464	23.4601	24.0016	23.5864	23.3867	23.3815	24.0015	23.5281	23.2241	23.4846	417741	17.6247	0.38916	16.3432	23.3554	23.4299	23.3305
08/03 05:40:00	22.4333	73.2858	22.9826	23.324	23.3596	23.3761	24.4276	24.4528	23.442	24.0014	23.6012	23.3685	23.4824	24.0014	23.6208	23.4078	23.3996	24.0014	23.5582	23.2409	23.4926	419796	17.899	0.392958	16.5036	23.349	23.436	23.3244
08/03 05:45:00	22.525	82.8926	22.9788	23.3222	23.3573	23.3689	24.431	24.456	23.465	24.0014	23.6315	23.3917	23.5049	24.0014	23.6514	23.43	23.4179	24.0014	23.5846	23.2589	23.5008	422406	18.1829	0.396705	16.6869	23.3426	23.4407	23.3185
08/03 05:50:00	22.6167	92.9735	22.9749	23.3194	23.3539	23.3609	24.434	24.4586	23.4885	24.0014	23.6583	23.4162	23.528	24.0015	23.6788	23.4537	23.4369	24.0014	23.6079	23.2784	23.5097	426004	18.4761	0.400442	16.8938	23.3362	23.4446	23.3127
08/03 05:55:00	22.7083	103.528	22.9711	23.316	23.3501	23.3524	24.4366	24.461	23.513	24.0015	23.6835	23.4416	23.5521	24.0015	23.7048	23.4784	23.457	24.0015	23.6299	23.299	23.519	430241	18.7789	0.404248	17.1251	23.344	23.4481	23.3211
08/03 06:00:00	22.8	114.555	22.9674	23.3124	23.3461	23.3438	24.4391	24.4631	23.5385	24.0015	23.708	23.468	23.5774	24.0016	23.7305	23.5043	23.4785	24.0015	23.6517	23.3209	23.5291	434926	19.0911	0.408176	17.3502	23.356	23.4517	23.3337
08/03 06:05:00	22.9833	126.053	22.9636	23.3089	23.3421	23.3354	24.4419	24.4658	23.5674	24.0016	23.7346	23.4975	23.6063	24.0016	23.7584	23.5334	23.5036	24.0016	23.6757	23.3461	23.5457	437285	19.5044	0.412259	17.594	23.3684	23.4561	23.3468
08/03 06:10:00	23.1667	138.021	22.9599	23.3067	23.3396	23.3286	24.4452	24.4687	23.5987	24.0017	23.7622	23.5291	23.6378	24.0017	23.7874	23.5648	23.5313	24.0017	23.701	23.3736	23.5666	442983	19.9271	0.416281	17.8568	23.3815	23.4619	23.3608
08/03 06:15:00	23.35	150.456	22.9562	23.3042	23.3367	23.3215	24.4488	24.4721	23.6318	24.0017	23.7903	23.5622	23.6712	24.0018	23.8182	23.5977	23.5612	24.0017	23.728	23.4028	23.5905	450164	20.3591	0.420495	18.139	23.3958	23.468	23.3759
08/03 06:20:00	23.5333	163.355	22.9526	23.3017	23.3338	23.3146	24.4527	24.4758	23.6664	24.0018	23.8198	23.5963	23.7062	24.0018	23.8504	23.632	23.5927	24.0018	23.7566	23.4335	23.6169	458186	20.8004	0.425013	18.4408	23.411	23.4744	23.392
08/03 06:25:00	23.7167	176.715	22.949	23.2991	23.331	23.3078	24.4569	24.4798	23.7023	24.0019	23.8506	23.6316	23.7428	24.0019	23.8842	23.6675	23.6259	24.002	23.7869	23.4655	23.6456	464149	21.251	0.429889	18.7625	23.4169	23.4812	23.399
08/03 06:30:00	23.9	190.533	22.9454	23.2967	23.3283	23.3014	24.4613	24.484	23.7396	24.0019	23.8826	23.6679	23.7807	24.002	23.9192	23.7043	23.6607	24.002	23.8186	23.4989	23.6763	470020	21.7107	0.434761	19.1046	23.423	23.4884	23.4061
08/03 06:35:00	24.0833	204.081	22.9419	23.2945	23.3258	23.2952	24.4659	24.4884	23.7799	24.0021	23.9224	23.7073	23.8219	24.0021	23.9622	23.7443	23.6989	24.0021	23.8584	23.5357	23.7069	478195	22.165	0.439492	19.4671	23.4299	23.497	23.4143
08/03 06:40:00	24.2667	218.218	22.9384	23.2924	23.3235	23.2895	24.471	24.4933	23.8199	24.0021	23.9608	23.7461	23.8631	24.0021	24.0005	23.7839	23.7372	24.0022	23.897	23.5722	23.7377	484288	22.631	0.44453	19.8455	23.436	23.5053	23.4217
08/03 06:45:00	24.45	232.938	22.9349	23.2907	23.3214	23.2842	24.4764	24.4982	23.8592	24.0022	23.9957	23.7839	23.9034	24.0022	24.0015	23.8226	23.775	24.0023	23.9325	23.6082	23.7689	487270	23.1088	0.449904	20.2398	23.4407	23.51	23.4277
08/03 06:50:00	24.6333	248.234	22.9315	23.289	23.3196	23.2792	24.4817	24.5028	23.8982	24.0024	24.0014	23.8214	23.944	24.0024	24.0017	23.8614	23.813	24.0023	23.9659	23.6442	23.8008	452409	23.598	0.455309	20.6503	23.4446	23.5149	23.433
08/03 06:55:00	24.8167	264.1	22.9281	23.2875	23.3179	23.2746	24.4868	24.5074	23.9374	24.0025	24.0016	23.8591	23.9848	24.0025	24.0017	23.9004	23.8515	24.0024	23.9979	23.6807	23.8341	398978	24.0987	0.45751	21.0771	23.4481	23.5199	23.4386
08/03 07:00:00	25	280.528	22.9247	23.2862	23.3163	23.2702	24.4917	24.5116	23.977	24.0025	24.0017	23.897	24.0012	24.0025	24.0018	23.9398	23.8905	24.0024	24.0015	23.7176	23.8681	380183	24.6106	0.454904	21.5204	23.4517	23.5227	23.445
08/03 07:05:00	25.1417	297.51	23.3047	23.7318	23.7612	23.7137	24.4882	24.5079	24.0015	24.0019	24.0019	24.0003	24.0019	24.0018	24.0019	24.0008	24.0004	24.0019	24.0019	23.9987	23.8665	467590	25.0919	0.450343	21.9804	23.4561	23.8349	23.4525
08/03 07:10:00	25.2833	315.038	23.6731	23.9978	23.9977	23.9979	24.4961	24.5141	24.0019	24.0019	24.002	24.0017	24.002	24.0019	24.002	24.0018	24.0018	24.0019	24.0019	24.0015	23.8983	497960	25.5841	0.452868	22.446	23.4619	23.999	23.4606
08/03 07:15:00	25.425	333.102	23.9977	24.0003	24.0003	24.0002	24.5168	24.5353	24.0032	24.0029	24.0033	24.0029	24.0032	24.0028	24.0032	24.003	24.0031	24.0028	24.0032	24.0027	23.9621	505883	26.087	0.457449	22.9174	23.468	24.0011	23.4685
08/03 07:20:00	25.5667	351.692	24.0001	24.0004	24.0004	24.0004	24.5362	24.5545	24.0033	24.0029	24.0033	24.003	24.0033	24.0028	24.0032	24.003	24.0031	24.0028	24.0032	24.0028	24.0104	509461	26.6005	0.462093	23.3948	23.4744	24.0012	23.4768
08/03 07:25:00	25.7083	370.799	24	24.0005	24.0005	24.0005	24.5533	24.5711	24.0032	24.0028	24.0032	24.003	24.0032	24.0027	24.0032	24.003	24.0031	24.0027	24.0031	24.0028	24.0541	513355	27.1243	0.466366	23.8781	23.4812	24.0013	23.4855
08/03 07:30:00	25.85	390.412	24.0001	24.0006	24.0007	24.0006	24.567	24.5841	24.0032	24.0027	24.0032	24.0029	24.0032	24.0026	24.0031	24.0029	24.0031	24.0027	24.0031	24.0028	24.0941	517650	27.6582	0.470466	24.3675	23.4884	24.0014	23.4948
08/03 07:35:00	25.9917	402.041	24.0001	24.0008	24.0008	24.0007	24.5778	24.5941	24.0031	24.0026	24.0031	24.0029	24.0031	24.0025	24.003	24.0029	24.003	24.0026	24.003	24.0028	24.1309	521957	28.0325	0.474435	24.8632	23.497	24.0014	23.5055
08/03 07:40:00	26.1333	413.466	24.0001	24.0009	24.0009	24.0008	24.5862	24.6018	24.003	24.0025	24.003	24.0028	24.003	24.0024	24.0029	24.0028	24.003	24.0025	24.003	24.0027	24.1651	526168	28.4027	0.478082	25.3521	23.5053	24.0015	23.5159
08/03 07:45:00	26.275	424.685	24.0002	24.001	24.001	24.0009	24.5927	24.6077	24.003	24.0024	24.0029	24.0028	24.003	24.0023	24.0029	24.0027	24.003	24.0024	24.0029	24.0027	24.1972	530278	28.7687	0.481572	25.8331	23.51	24.0015	23.5227
08/03 07:50:00	26.4167	435.696	24.0002	24.0011	24.0011	24.001	24.5979	24.6122	24.0029	24.0023	24.0029	24.0027	24.0029	24.0023	24.0028	24.0027	24.0029	24.0023	24.0028	24.0027	24.2276	534307	29.1306	0.485156	26.3048	23.5149	24.0016	23.5296
08/03 07:55:00	26.5583	446.498	24.0002	24.0011	24.0012	24.0011	24.6021	24.6159	24.0029	24.0023	24.0028	24.0027	24.0028	24.0022	24.0027	24.0026	24.0029	24.0023	24.0028	24.0026	24.2565	538285	29.4883	0.491981	26.7658	23.5199	24.0016	23.5361
08/03 08:00:00	26.7	457.091	24.0003	24.0012	24.0012	24.0012	24.6057	24.6189	24.0028	24.0022	24.0027	24.0026	24.0028	24.0022	24.0027	24.0026	24.0028	24.0022	24.0027	24.0026	24.2843	542232	29.8418	0.50359	27.2149	23.5227	24.0017	23.5395
08/03 08:05:00	26.8333	467.473	24.0003	24.0013	24.0013	24.0013	24.6087	24.6215	24.0027	24.0022	24.0027	24.0026	24.0027	24.0021	24.0026	24.0025	24.0028	24.0022	24.0027	24.0026	24.3109	545910	30.1828	0.517094	27.6509	23.8349	24.0017	23.8513
08/03 08:10:00	26.9667	477.645	24.0003	24.0013	24.0014	24.0014	24.6121	24.6245	24.0025	24.0021	24.0026	24.0025	24.0025	24.0021	24.0026	24.0025	24.0025	24.0021	24.0026	24.0025	24.3369	549057	30.5196	0.523621	28.0751	23.999	24.0017	24.0164
08/03 08:15:00	27.1	487.604	24.0004	24.0014	24.0014	24.0014	24.6146	24.6267	24.0024	24.0021	24.0026	24.0025	24.0024	24.0021	24.0025	24.0024	24.0024	24.0021	24.0026	24.0025	24.3612	552026	30.8521	0.527879	28.4864	24.0011	24.0017	24.0201
08/03 08:20:00	27.2333	497.351	24.0004	24.0015	24.0015	24.0015	24.6162	24.628	24.0023	24.0021	24.0025	24.0024	24.0023	24.0021	24.0025	24.0024	24.0024	24.0021	24.0025	24.0025	24.3844	554944	31.1804	0.531724	28.8835	24.0012	24.0017	24.0218
08/03 08:25:00	27.3667	506.886	24.0004	24.0015	24.0015	24.0015	24.6176	24.629	24.0023	24.0021	24.0025	24.0024	24.0023	24.0021	24.0024	24.0024	24.0023	24.0021	24.0025	24.0024	24.4068	557784	31.5044	0.535514	29.2652	24.0013	24.0018	24.0234
08/03 08:30:00	27.5	516.209	24.0004	24.0016	24.0016	24.0016	24.619	24.63	24.0023	24.0021	24.0024	24.0024	24.0023	24.002	24.0024	24.0023	24.0023	24.0021	24.0024	24.0024	24.4288	560582	31.8242	0.539217	29.6302	24.0014	24.0018	24.0249
08/03 08:35:00	27.6333	527.594	24.0005	24.0016	24.0016	24.0016	24.6204	24.6311	24.0023	24.002	24.0024	24.0023	24.0022	24.002	24.0024	24.0023	24.0023	24.0021	24.0024	24.0024	24.4503	563352	32.1852	0.542794	29.9773	24.0014	24.0018	24.0263
08/03 08:40:00	27.7667	539.042	24.0005	24.0016	24.0017	24.0017	24.6218	24.6323	24.0023	24.002	24.0024	24.0023	24.0022	24.002	24.0023	24.0023	24.0023	24.0021	24.0024	24.0023	24.4714	566105	32.5475	0.546244	30.3234	24.0015	24.0018	24.0278
08/03 08:45:00	27.9	550.545	24.0005	24.0017	24.0017	24.0017	24.6232	24.6335	24.0022	24.002	24.0023	24.0023	24.0022	24.002	24.0023	24.0023	24.0023	24.0021	24.0023	24.0023	24.4918	568847	32.9109	0.549572	30.6688	24.0015	24.0019	24.0292
08/03 08:50:00	28.0333	562.097	24.0005	24.0017	24.0017	24.0017	24.6247	24.6346	24.0022	24.002	24.0023	24.0023	24.0022	24.002	24.0023	24.0022	24.0023	24.0021	24.0023	24.0023	24.5112	571584	33.2753	0.552786	31.014	24.0016	24.0019	24.0306
08/03 08:55:00	28.1667	573.69	24.0006	24.0017	24.0018	24.0018	24.6261	24.6358	24.0022	24.002	24.0023	24.0022	24.0022	24.002	24.0022	24.0022	24.0023	24.002	24.0023	24.0023	24.5293	574315	33.6405	0.555892	31.3594	24.0016	24.0019	24.0321
08/03 09:00:00	28.3	585.315	24.0006	24.0017	24.0018	24.0018	24.6275	24.637	24.0022	24.002	24.0023	24.0022	24.0022	24.002	24.0022	24.0022	24.0023	24.002	24.0023	24.0023	24.5479	577042	34.0063	0.558895	31.7054	24.0017	24.0019	24.0336
08/03 09:05:00	28.3917	596.967	24.0006	24.0018	24.0018	24.0018	24.6289	24.6381	24.0022	24.002	24.0022	24.0022	24.0022	24.002	24.0022	24.0022	24.0023	24.002	24.0023	24.0022	24.5661	579549	34.331	0.561796	32.0524	24.0017	24.0019	24.0351
08/03 09:10:00	28.4833	608.636	24.0006	24.0018	24.0018	24.0018	24.6302	24.6392	24.0022	24.002	24.0022	24.0022	24.0022	24.002	24.0022	24.0022	24.0023	24.002	24.0022	24.0022	24.5843	581820	34.6561	0.564599	32.3981	24.0017	24.0019	24.0366
08/03 09:15:00	28.575	620.315	24.0006	24.0018	24.0018	24.0019	24.6315	24.6403	24.0022	24.002	24.0022	24.0022	24.0022	24.002	24.0022	24.0022	24.0023	24.002	24.0022	24.0022	24.6026	583960	34.9813	0.567329	32.7428	24.0017	24.0019	24.0381
08/03 09:20:00	28.6667	631.997	24.0007	24.0018	24.0018	24.0019	24.6328	24.6414	24.0022	24.002	24.0022	24.0022	24.0022	24.002	24.0022	24.0022	24.0022	24.002	24.0022	24.0022	24.6209	586016	35.3066	0.56999	33.0869	24.0017	24.0019	24.0396
08/03 09:25:00	28.7583	643.673	24.0007	24.0018	24.0019	24.0019	24.6341	24.6425	24.0022	24.002	24.0022	24.0022	24.0022	24.002	24.0022	24.0021	24.0022	24.002	24.0022	24.0022	24.6394	588017	35.6318	0.57258	33.4308	24.0018	24.0019	24.0411
08/03 09:30:00	28.85	655.336	24.0007	24.0018	24.0019	24.0019	24.6353	24.6435	24.0022	24.002	24.0022	24.0021	24.0022	24.002	24.0021	24.0021	24.0022	24.002	24.0022	24.0022	24.658	590010	35.9567	0.575099	33.7747	24.0018	24.0019	24.0426
08/03 09:35:00	28.9417	664.575	24.0007	24.0018	24.0019	24.0019	24.6366	24.6446	24.0022	24.002	24.0022	24.0021	24.0022	24.002	24.0021	24.0021	24.0022	24.002	24.0022	24.0022	24.6768	591952	36.2332	0.577551	34.1191	24.0018	24.002	24.0441
08/03 09:40:00	29.0333	673.597	24.0007	24.0019	24.0019	24.0019	24.6379	24.6457	24.0022	24.002	24.0022	24.0021	24.0022	24.002	24.0021	24.0021	24.0022	24.002	24.0022	24.0022	24.6957	593887	36.5053	0.579935	34.4564	24.0018	24.002	24.0456
08/03 09:45:00	29.125	682.404	24.0007	24.0019	24.0019	24.0019	24.6391	24.6468	24.0022	24.002	24.0022	24.0021	24.0022	24.002	24.0021	24.0021	24.0022	24.002	24.0022	24.0022	24.7146	595821	36.7731	0.58225	34.7862	24.0019	24.002	24.0471
08/03 09:50:00	29.2167	690.995	24.0008	24.0019	24.0019	24.0019	24.6404	24.6479	24.0022	24.002	24.0022	24.0021	24.0022	24.002	24.0021	24.0021	24.0022	24.002	24.0022	24.0022	24.7338	597748	37.0366	0.584498	35.1081	24.0019	24.002	24.0486
08/03 09:55:00	29.3083	699.373	24.0008	24.0019	24.0019	24.0019	24.6417	24.649	24.0022	24.002	24.0021	24.0021	24.0022	24.002	24.0021	24.0021	24.0022	24.002	24.0022	24.0022	24.753	599671	37.2958	0.586678	35.4215	24.0019	24.002	24.05
08/03 10:00:00	29.4	707.537	24.0008	24.0019	24.0019	24.0019	24.643	24.6501	24.0022	24.002	24.0021	24.0021	24.0022	24.002	24.0021	24.0021	24.0022	24.002	24.0022	24.0022	24.7724	601588	37.5507	0.588791	35.7261	24.0019	24.002	24.0513
08/03 10:05:00	29.5	715.49	24.0006	24.0016	24.0017	24.0017	24.6569	24.6639	24.002	24.0018	24.002	24.002	24.002	24.0018	24.002	24.002	24.002	24.0019	24.002	24.002	24.8074	599124	37.8098	0.590837	36.0215	24.0019	24.0017	24.0526
08/03 10:10:00	29.6	723.232	24.0006	24.0016	24.0016	24.0017	24.6622	24.6687	24.0019	24.0018	24.0019	24.0019	24.0019	24.0018	24.0019	24.0019	24.0019	24.0018	24.0019	24.0019	24.8323	599292	38.0646	0.592468	36.3114	24.0019	24.0017	24.054
08/03 10:15:00	29.7	730.765	24.0006	24.0016	24.0016	24.0017	24.6633	24.6695	24.0019	24.0017	24.0019	24.0019	24.0019	24.0017	24.0019	24.0019	24.0019	24.0018	24.0019	24.0019	24.8525	599901	38.3153	0.593924	36.5955	24.0019	24.0017	24.0553
08/03 10:20:00	29.8	738.09	24.0006	24.0016	24.0016	24.0017	24.6632	24.6691	24.0019	24.0017	24.0019	24.0019	24.0019	24.0017	24.0019	24.0019	24.0019	24.0017	24.0019	24.0019	24.8714	600726	38.5618	0.595252	36.8733	24.0019	24.0017	24.0567
08/03 10:25:00	29.9	745.208	24.0006	24.0016	24.0016	24.0017	24.663	24.6688	24.0019	24.0017	24.0019	24.0019	24.0019	24.0017	24.0018	24.0018	24.0019	24.0017	24.0019	24.0019	24.8901	601721	38.8042	0.596478	37.1446	24.0019	24.0017	24.058
08/03 10:30:00	30	752.123	24.0007	24.0016	24.0016	24.0017	24.6631	24.6687	24.0019	24.0017	24.0019	24.0019	24.0019	24.0017	24.0018	24.0018	24.0019	24.0017	24.0019	24.0019	24.9091	602841	39.0425	0.59762	37.4089	24.0019	24.0017	24.0592
08/03 10:35:00	30.1	754.294	24.0007	24.0016	24.0016	24.0017	24.6635	24.669	24.0019	24.0017	24.0019	24.0018	24.0019	24.0017	24.0018	24.0018	24.0019	24.0017	24.0019	24.0019	24.9286	604015	39.1859	0.598689	37.6661	24.002	24.0017	24.0605
08/03 10:40:00	30.2	756.274	24.0007	24.0016	24.0016	24.0017	24.6642	24.6696	24.0019	24.0017	24.0018	24.0018	24.0019	24.0017	24.0018	24.0018	24.0019	24.0017	24.0019	24.0019	24.9485	605221	39.3255	0.599695	37.9121	24.002	24.0017	24.0617
08/03 10:45:00	30.3	758.065	24.0007	24.0016	24.0016	24.0017	24.665	24.6703	24.0019	24.0017	24.0018	24.0018	24.0019	24.0017	24.0018	24.0018	24.0019	24.0017	24.0019	24.0019	24.9686	606446	39.4613	0.600639	38.1471	24.002	24.0017	24.0628
08/03 10:50:00	30.4	759.668	24.0007	24.0016	24.0016	24.0017	24.6658	24.6711	24.0019	24.0017	24.0018	24.0018	24.0018	24.0017	24.0018	24.0018	24.0019	24.0017	24.0018	24.0019	24.989	607679	39.5934	0.601525	38.3712	24.002	24.0017	24.0639
08/03 10:55:00	30.5	761.084	24.0007	24.0016	24.0016	24.0017	24.6668	24.672	24.0019	24.0017	24.0018	24.0018	24.0018	24.0017	24.0018	24.0018	24.0019	24.0017	24.0018	24.0018	25.0095	608911	39.7217	0.602352	38.5842	24.002	24.0017	24.065
08/03 11:00:00	30.6	762.315	24.0007	24.0016	24.0016	24.0017	24.6678	24.6729	24.0019	24.0017	24.0018	24.0018	24.0018	24.0017	24.0018	24.0018	24.0019	24.0017	24.0018	24.0018	25.0303	610137	39.8463	0.603122	38.7864	24.002	24.0017	24.066
08/03 11:05:00	30.6	763.363	24.0004	24.0011	24.0012	24.0012	24.6955	24.7004	24.0015	24.0014	24.0015	24.0015	24.0015	24.0014	24.0015	24.0015	24.0015	24.0014	24.0015	24.0015	25.0918	603489	39.8673	0.603834	38.9777	24.0017	24.0013	24.0667
08/03 11:10:00	30.6	764.229	23.9961	24.001	24.0011	24.0011	24.7064	24.7105	24.0014	24.0013	24.0014	24.0014	24.0014	24.0013	24.0014	24.0014	24.0014	24.0013	24.0014	24.0014	25.1276	600961	39.8846	0.604198	39.1491	24.0017	24.0012	24.0675
08/03 11:15:00	30.6	764.916	23.9906	24.001	24.0011	24.0011	24.7086	24.7119	24.0013	24.0012	24.0013	24.0013	24.0013	24.0012	24.0013	24.0013	24.0013	24.0012	24.0013	24.0013	25.1511	598979	39.8983	0.604337	39.3008	24.0017	24.0011	24.0683
08/03 11:20:00	30.6	765.424	23.9854	24.001	24.0011	24.0011	24.7078	24.7105	24.0013	24.0012	24.0013	24.0013	24.0013	24.0012	24.0013	24.0013	24.0013	24.0012	24.0013	24.0013	25.1704	597180	39.9085	0.60426	39.4327	24.0017	24.0011	24.0691
08/03 11:25:00	30.6	765.757	23.9806	24.001	24.0011	24.0011	24.7063	24.7088	24.0013	24.0012	24.0013	24.0013	24.0013	24.0012	24.0013	24.0013	24.0013	24.0012	24.0013	24.0013	25.1886	595586	39.9151	0.603965	39.5449	24.0017	24.0011	24.0697
08/03 11:30:00	30.6	765.916	23.9765	24.001	24.001	24.0011	24.705	24.7075	24.0013	24.0012	24.0013	24.0013	24.0013	24.0012	24.0012	24.0013	24.0013	24.0012	24.0013	24.0013	25.2067	594172	39.9183	0.603454	39.6375	24.0017	24.0011	24.0703
08/03 11:35:00	30.6	773.027	23.9731	24.001	24.001	24.0011	24.7041	24.7065	24.0013	24.0012	24.0012	24.0013	24.0013	24.0012	24.0012	24.0012	24.0013	24.0012	24.0012	24.0013	25.2251	592904	40.0605	0.602731	39.7105	24.0017	24.0011	24.0708
08/03 11:40:00	30.6	779.994	23.9703	24.001	24.001	24.0011	24.7035	24.7059	24.0013	24.0011	24.0012	24.0012	24.0012	24.0011	24.0012	24.0012	24.0013	24.0012	24.0012	24.0012	25.2437	591742	40.1999	0.601805	39.7834	24.0017	24.0011	24.0714
08/03 11:45:00	30.6	786.811	23.968	24.001	24.001	24.0011	24.7033	24.7057	24.0012	24.0011	24.0012	24.0012	24.0012	24.0011	24.0012	24.0012	24.0013	24.0012	24.0012	24.0012	25.2625	590654	40.3362	0.600682	39.8563	24.0017	24.0011	24.0719
08/03 11:50:00	30.6	793.47	23.9661	24.001	24.001	24.0011	24.7033	24.7058	24.0012	24.0011	24.0012	24.0012	24.0012	24.0011	24.0012	24.0012	24.0012	24.0011	24.0012	24.0012	25.2817	589622	40.4694	0.599366	39.9292	24.0017	24.0011	24.0725
08/03 11:55:00	30.6	799.964	23.9647	24.001	24.001	24.0011	24.7024	24.7048	24.0012	24.0013	24.0012	24.0012	24.0012	24.0013	24.0012	24.0012	24.0013	24.0013	24.0012	24.0012	25.2985	588901	40.5993	0.597861	40.0022	24.0017	24.0011	24.0732
08/03 12:00:00	30.6	806.287	23.9637	24.001	24.001	24.0011	24.7022	24.7047	24.0012	24.0014	24.0012	24.0012	24.0012	24.0013	24.0012	24.0012	24.0013	24.0014	24.0012	24.0012	25.3162	588186	40.7257	0.596194	40.0753	24.0017	24.0011	24.0738
08/03 12:05:00	30.6	812.432	24.0001	24.0015	24.0015	24.0015	24.6764	24.6792	24.0016	24.0017	24.0015	24.0014	24.0015	24.0016	24.0015	24.0014	24.0015	24.0016	24.0015	24.0014	25.2854	593380	40.8486	0.594365	40.1486	24.0013	24.0015	24.0741
08/03 12:10:00	30.6	818.392	24.0007	24.0016	24.0016	24.0016	24.6676	24.6713	24.0016	24.0018	24.0016	24.0014	24.0016	24.0017	24.0016	24.0014	24.0017	24.0018	24.0017	24.0015	25.2867	595467	40.9678	0.593522	40.2304	24.0012	24.0016	24.0746
08/03 12:15:00	30.6	824.16	24.0007	24.0016	24.0016	24.0016	24.6673	24.6718	24.0017	24.0018	24.0017	24.0015	24.0017	24.0018	24.0017	24.0015	24.0017	24.0018	24.0017	24.0016	25.3014	597259	41.0832	0.593064	40.3206	24.0011	24.0016	24.0751
08/03 12:20:00	30.6	829.73	24.0007	24.0016	24.0016	24.0017	24.6699	24.6746	24.0017	24.0018	24.0017	24.0016	24.0017	24.0018	24.0017	24.0016	24.0017	24.0018	24.0017	24.0016	25.3202	598782	41.1946	0.592921	40.4194	24.0011	24.0016	24.0756
08/03 12:25:00	30.6	835.096	24.0007	24.0017	24.0016	24.0017	24.6729	24.6777	24.0017	24.0018	24.0017	24.0016	24.0017	24.0018	24.0017	24.0016	24.0018	24.0018	24.0017	24.0017	25.3399	600021	41.3019	0.593055	40.5266	24.0011	24.0017	24.0762
08/03 12:30:00	30.6	840.252	24.0007	24.0017	24.0016	24.0017	24.6758	24.6805	24.0018	24.0018	24.0017	24.0017	24.0017	24.0018	24.0017	24.0017	24.0018	24.0018	24.0018	24.0017	25.3595	601043	41.405	0.593424	40.6421	24.0011	24.0017	24.0768
08/03 12:35:00	30.6	839.473	24.0007	24.0017	24.0017	24.0017	24.6784	24.683	24.0018	24.0018	24.0017	24.0017	24.0017	24.0018	24.0017	24.0017	24.0018	24.0018	24.0018	24.0017	25.3789	601881	41.3895	0.593997	40.766	24.0011	24.0017	24.0774
08/03 12:40:00	30.6	838.483	24.0007	24.0017	24.0017	24.0017	24.6807	24.6851	24.0018	24.0018	24.0017	24.0017	24.0017	24.0018	24.0017	24.0017	24.0018	24.0018	24.0018	24.0018	25.398	602590	41.3697	0.594745	40.8768	24.0011	24.0017	24.0778
08/03 12:45:00	30.6	837.276	24.0007	24.0017	24.0017	24.0017	24.6827	24.6869	24.0018	24.0018	24.0017	24.0018	24.0017	24.0018	24.0017	24.0017	24.0018	24.0018	24.0018	24.0018	25.4167	603211	41.3455	0.595649	40.9742	24.0011	24.0017	24.0782
08/03 12:50:00	30.6	835.849	24.0007	24.0017	24.0017	24.0017	24.6844	24.6885	24.0018	24.0018	24.0017	24.0018	24.0017	24.0018	24.0017	24.0018	24.0018	24.0018	24.0018	24.0018	25.4349	603773	41.317	0.596695	41.0584	24.0011	24.0017	24.0785
08/03 12:55:00	30.6	834.199	24.0007	24.0017	24.0017	24.0017	24.686	24.69	24.0018	24.0018	24.0017	24.0018	24.0017	24.0018	24.0017	24.0018	24.0018	24.0018	24.0018	24.0018	25.4528	604284	41.284	0.597874	41.129	24.0011	24.0017	24.0788
08/03 13:00:00	30.6	832.322	24.0007	24.0017	24.0017	24.0017	24.6875	24.6913	24.0017	24.0018	24.0017	24.0018	24.0017	24.0017	24.0017	24.0018	24.0018	24.0018	24.0018	24.0018	25.4704	604751	41.2464	0.599156	41.186	24.0011	24.0017	24.0789
08/03 13:05:00	30.6917	830.214	24.001	24.002	24.0019	24.002	24.6756	24.6794	24.0019	24.0019	24.0019	24.002	24.0019	24.0019	24.0019	24.002	24.0019	24.0019	24.0019	24.002	25.46	610666	41.296	0.600537	41.2294	24.0015	24.0019	24.0793
08/03 13:10:00	30.7833	827.872	24.001	24.002	24.002	24.002	24.6733	24.6773	24.002	24.002	24.002	24.0021	24.002	24.002	24.002	24.002	24.002	24.002	24.002	24.0021	25.4697	614017	41.3408	0.601977	41.2667	24.0016	24.002	24.0794
08/03 13:15:00	30.875	825.294	24.001	24.002	24.002	24.002	24.6751	24.6792	24.002	24.002	24.002	24.0021	24.002	24.002	24.002	24.0021	24.002	24.0021	24.002	24.0021	25.486	617065	41.3809	0.603523	41.2978	24.0016	24.002	24.0793
08/03 13:20:00	30.9667	822.475	24.001	24.002	24.002	24.002	24.678	24.682	24.002	24.002	24.002	24.0021	24.002	24.002	24.002	24.0021	24.002	24.0021	24.002	24.0021	25.5037	619930	41.4162	0.605174	41.3226	24.0016	24.002	24.0792
08/03 13:25:00	31.0583	819.412	24.001	24.002	24.002	24.002	24.6809	24.6848	24.002	24.002	24.002	24.0021	24.002	24.002	24.002	24.0021	24.002	24.002	24.002	24.0021	25.5216	622587	41.4466	0.606936	41.3411	24.0017	24.002	24.0791
08/03 13:30:00	31.15	816.104	24.001	24.002	24.002	24.002	24.6834	24.6872	24.002	24.002	24.002	24.0021	24.002	24.002	24.002	24.0021	24.002	24.002	24.002	24.0021	25.5389	625139	41.4721	0.608817	41.3531	24.0017	24.002	24.0789
08/03 13:35:00	31.2417	798.89	24.001	24.002	24.0019	24.002	24.6856	24.6892	24.002	24.002	24.002	24.0021	24.002	24.002	24.002	24.0021	24.002	24.002	24.002	24.0021	25.5559	627583	41.2195	0.610825	41.3587	24.0017	24.002	24.0786
08/03 13:40:00	31.3333	781.66	24.001	24.002	24.0019	24.002	24.6877	24.6912	24.002	24.002	24.002	24.0021	24.002	24.002	24.002	24.0021	24.002	24.002	24.002	24.0021	25.5726	629903	40.9665	0.612966	41.3445	24.0017	24.002	24.0782
08/03 13:45:00	31.425	764.428	24.001	24.002	24.0019	24.002	24.6897	24.6929	24.002	24.002	24.002	24.0021	24.002	24.002	24.002	24.0021	24.002	24.002	24.002	24.0021	25.5892	632131	40.7136	0.615243	41.3109	24.0017	24.0019	24.0777
08/03 13:50:00	31.5167	747.208	24.001	24.002	24.0019	24.0019	24.6915	24.6946	24.002	24.002	24.002	24.0021	24.002	24.002	24.002	24.0021	24.002	24.002	24.002	24.0021	25.6053	634289	40.4608	0.617653	41.2583	24.0017	24.0019	24.077
08/03 13:55:00	31.6083	730.014	24.001	24.0019	24.0019	24.0019	24.6932	24.6961	24.002	24.002	24.002	24.0021	24.002	24.002	24.002	24.0021	24.002	24.002	24.002	24.0021	25.6212	636390	40.2086	0.620196	41.1869	24.0017	24.0019	24.0763
08/03 14:00:00	31.7	712.859	24.001	24.0019	24.0019	24.0019	24.6948	24.6975	24.002	24.002	24.002	24.0021	24.002	24.002	24.002	24.0021	24.002	24.002	24.002	24.0021	25.6367	638444	39.9572	0.622871	41.0973	24.0017	24.0019	24.0754
08/03 14:05:00	31.7	695.758	24.001	24.0019	24.0019	24.0019	24.6963	24.6989	24.002	24.002	24.002	24.0021	24.002	24.002	24.002	24.002	24.002	24.002	24.002	24.0021	25.651	639616	39.6152	0.625679	40.9899	24.0019	24.0019
08/03 14:10:00	31.7	678.724	24.001	24.0019	24.0019	24.0019	24.6977	24.7002	24.002	24.002	24.002	24.0021	24.002	24.002	24.002	24.002	24.002	24.002	24.002	24.0021	25.6647	639872	39.2745	0.628091	40.8498	24.002	24.0019
08/03 14:15:00	31.7	661.77	24.001	24.0019	24.0019	24.0019	24.6991	24.7015	24.002	24.002	24.002	24.0021	24.002	24.002	24.002	24.002	24.002	24.002	24.002	24.0021	25.678	639661	38.9354	0.630246	40.6776	24.002	24.0019
08/03 14:20:00	31.7	644.91	24.001	24.0019	24.0019	24.0019	24.7004	24.7027	24.002	24.002	24.002	24.0021	24.002	24.002	24.002	24.002	24.002	24.002	24.002	24.0021	25.691	639163	38.5982	0.632129	40.4738	24.002	24.0019
08/03 14:25:00	31.7	628.156	24.001	24.0019	24.0019	24.0019	24.7017	24.7039	24.002	24.002	24.002	24.002	24.0019	24.002	24.002	24.002	24.002	24.002	24.002	24.002	25.7037	638487	38.2631	0.633732	40.239	24.002	24.0019
08/03 14:30:00	31.7	611.523	24.001	24.0019	24.0018	24.0019	24.703	24.7051	24.002	24.002	24.002	24.002	24.0019	24.002	24.002	24.002	24.002	24.002	24.002	24.002	25.7161	637695	37.9305	0.635056	39.9737	24.002	24.0019
08/03 14:35:00	31.7	605.133	24.001	24.0019	24.0018	24.0019	24.7042	24.7062	24.002	24.002	24.002	24.002	24.0019	24.002	24.002	24.002	24.002	24.002	24.002	24.002	25.728	636887	37.8027	0.636103	39.6786	24.002	24.0019
08/03 14:40:00	31.7	598.574	24.001	24.0019	24.0018	24.0019	24.7053	24.7072	24.002	24.002	24.002	24.002	24.0019	24.002	24.002	24.002	24.002	24.002	24.002	24.002	25.7394	636062	37.6715	0.636878	39.3939	24.002	24.0019
08/03 14:45:00	31.7	591.846	24.001	24.0019	24.0018	24.0019	24.7065	24.7083	24.002	24.002	24.002	24.002	24.0019	24.002	24.002	24.002	24.002	24.002	24.002	24.002	25.7505	635222	37.5369	0.637391	39.1193	24.0019	24.0019
08/03 14:50:00	31.7	584.949	24.001	24.0019	24.0018	24.0018	24.7077	24.7094	24.002	24.002	24.002	24.002	24.0019	24.002	24.0019	24.002	24.002	24.002	24.002	24.002	25.7613	634369	37.399	0.637649	38.8545	24.0019	24.0019
08/03 14:55:00	31.7	577.883	24.001	24.0019	24.0018	24.0018	24.7089	24.7105	24.002	24.002	24.002	24.002	24.0019	24.0019	24.0019	24.002	24.002	24.002	24.002	24.002	25.7718	633504	37.2577	0.637656	38.5994	24.0019	24.0019
08/03 15:00:00	31.7	570.65	24.001	24.0019	24.0018	24.0018	24.7102	24.7117	24.0019	24.002	24.002	24.002	24.0019	24.0019	24.0019	24.002	24.002	24.002	24.002	24.002	25.782	632628	37.113	0.637415	38.3535	24.0019	24.0019
08/03 15:05:00	31.7	563.251	24.001	24.0018	24.0018	24.0018	24.7114	24.7129	24.0019	24.002	24.002	24.002	24.0019	24.0019	24.0019	24.002	24.002	24.002	24.002	24.002	25.7918	631745	36.965	0.63693	38.1165	24.0019	24.0019
08/03 15:10:00	31.7	555.684	24.001	24.0018	24.0018	24.0018	24.7126	24.7139	24.0019	24.002	24.002	24.002	24.0019	24.0019	24.0019	24.002	24.002	24.002	24.002	24.002	25.801	630888	36.8137	0.636274	37.8956	24.0019	24.0019
08/03 15:15:00	31.7	547.953	24.001	24.0019	24.0018	24.0018	24.7138	24.7151	24.0019	24.002	24.002	24.002	24.0019	24.0019	24.0019	24.002	24.0019	24.002	24.0019	24.002	25.8102	629984	36.6591	0.635526	37.6905	24.0019	24.0019
08/03 15:20:00	31.7	540.057	24.001	24.0019	24.0018	24.0018	24.7151	24.7163	24.0019	24.0019	24.0019	24.002	24.0019	24.0019	24.0019	24.002	24.0019	24.0019	24.0019	24.002	25.8189	629064	36.5011	0.634719	37.5009	24.0019	24.0019
08/03 15:25:00	31.7	531.998	24.001	24.0019	24.0018	24.0018	24.7163	24.7174	24.0019	24.0019	24.0019	24.002	24.0019	24.0019	24.0019	24.002	24.0019	24.0019	24.0019	24.002	25.8273	628130	36.34	0.633878	37.3261	24.0019	24.0019
08/03 15:30:00	31.7	523.776	24.001	24.0019	24.0018	24.0018	24.7176	24.7186	24.0019	24.0019	24.0019	24.002	24.0019	24.0019	24.0019	24.002	24.0019	24.0019	24.0019	24.002	25.8353	627183	36.1755	0.633015	37.1658	24.0019	24.0019
08/03 15:35:00	31.7	507.828	24.001	24.0019	24.0018	24.0018	24.719	24.7199	24.0019	24.0019	24.0019	24.002	24.0019	24.0019	24.0019	24.0019	24.0019	24.0019	24.0019	24.002	25.8432	626170	35.8566	0.632139	37.0196	24.0019	24.0019
08/03 15:40:00	31.7	492.078	24.001	24.0019	24.0018	24.0018	24.7203	24.7212	24.0019	24.0019	24.0019	24.0019	24.0019	24.0019	24.0019	24.0019	24.0019	24.0019	24.0019	24.0019	25.8508	625113	35.5416	0.631246	36.8574	24.0019	24.0019
08/03 15:45:00	31.7	476.534	24.001	24.0019	24.0018	24.0018	24.7217	24.7225	24.0019	24.0019	24.0019	24.0019	24.0019	24.0019	24.0019	24.0019	24.0019	24.0019	24.0019	24.0019	25.8582	624025	35.2307	0.630333	36.6799	24.0019	24.0019
08/03 15:50:00	31.7	461.207	24.001	24.0019	24.0018	24.0019	24.7218	24.7225	24.002	24.0019	24.0019	24.0019	24.002	24.0019	24.0019	24.0019	24.002	24.0019	24.0019	24.0019	25.8613	623635	34.9241	0.6294	36.4877	24.0019	24.0019
08/03 15:55:00	31.7	446.104	24.001	24.0019	24.0019	24.0019	24.7227	24.7232	24.0021	24.0019	24.0019	24.0019	24.002	24.0019	24.0019	24.0019	24.0021	24.0019	24.0019	24.0019	25.8653	623192	34.6221	0.628506	36.2815	24.0019	24.0019
08/03 16:00:00	31.7	431.236	24.001	24.0019	24.0019	24.0019	24.7244	24.7249	24.0021	24.0019	24.0019	24.0019	24.002	24.0019	24.0019	24.0019	24.002	24.0019	24.0019	24.0019	25.8708	622458	34.3247	0.627646	36.0619	24.0019	24.0019
08/03 16:05:00	31.6083	416.611	24.001	24.0019	24.0019	24.0019	24.7261	24.7266	24.002	24.0019	24.0019	24.0019	24.002	24.0019	24.0019	24.0019	24.002	24.0019	24.0019	24.0019	25.8753	622065	33.9406	0.626799	35.8295	24.0019	24.0019
08/03 16:10:00	31.5167	402.237	24.001	24.0019	24.0018	24.0018	24.7279	24.7283	24.002	24.0019	24.0019	24.0019	24.002	24.0019	24.0019	24.0019	24.002	24.0019	24.0019	24.0019	25.8798	622003	33.5614	0.625992	35.5775	24.0019	24.0019
08/03 16:15:00	31.425	388.122	24.001	24.0018	24.0018	24.0018	24.7298	24.7301	24.0019	24.0019	24.0019	24.0018	24.0019	24.0018	24.0018	24.0018	24.0019	24.0019	24.0019	24.0018	25.8843	622011	33.1874	0.625252	35.3064	24.0019	24.0018
08/03 16:20:00	31.3333	374.273	24.001	24.0018	24.0018	24.0018	24.7312	24.7314	24.0019	24.0019	24.0019	24.0018	24.0019	24.0018	24.0018	24.0018	24.0019	24.0018	24.0018	24.0018	25.8879	622147	32.8188	0.624587	35.0171	24.0019	24.0018
08/03 16:25:00	31.2417	360.699	24.001	24.0018	24.0018	24.0018	24.7324	24.7326	24.0019	24.0018	24.0018	24.0018	24.0019	24.0018	24.0018	24.0018	24.0019	24.0018	24.0018	24.0018	25.8909	622344	32.4556	0.624011	34.7103	24.0019	24.0018
08/03 16:30:00	31.15	347.407	24.001	24.0018	24.0018	24.0018	24.7336	24.7336	24.0019	24.0018	24.0018	24.0018	24.0019	24.0018	24.0018	24.0018	24.0019	24.0018	24.0018	24.0018	25.8933	622551	32.0981	0.623529	34.3866	24.0019	24.0018
08/03 16:35:00	31.0583	332.845	24.001	24.0018	24.0018	24.0017	24.7348	24.7347	24.0019	24.0018	24.0018	24.0018	24.0019	24.0018	24.0018	24.0018	24.0019	24.0018	24.0018	24.0018	25.8957	622711	31.7152	0.623143	34.0468	24.0019	24.0018
08/03 16:40:00	30.9667	318.421	24.001	24.0018	24.0017	24.0017	24.7359	24.7358	24.0019	24.0018	24.0018	24.0018	24.0018	24.0018	24.0018	24.0018	24.0018	24.0018	24.0018	24.0018	25.8976	622857	31.3351	0.622855	33.7017	24.0019	24.0018
08/03 16:45:00	30.875	304.14	24.001	24.0018	24.0017	24.0017	24.737	24.7368	24.0019	24.0018	24.0018	24.0018	24.0018	24.0018	24.0018	24.0018	24.0018	24.0018	24.0018	24.0018	25.8991	622985	30.9578	0.622667	33.3512	24.0019	24.0018
08/03 16:50:00	30.7833	290.004	24.001	24.0017	24.0017	24.0017	24.738	24.7378	24.0019	24.0018	24.0018	24.0018	24.0018	24.0018	24.0018	24.0018	24.0018	24.0018	24.0018	24.0018	25.9002	623083	30.5834	0.62258	32.9951	24.0019	24.0018
08/03 16:55:00	30.6917	276.02	24.001	24.0017	24.0017	24.0017	24.7391	24.7388	24.0018	24.0018	24.0018	24.0018	24.0018	24.0018	24.0018	24.0018	24.0018	24.0018	24.0018	24.0018	25.9011	623150	30.2121	0.622534	32.6334	24.0019	24.0017
08/03 17:00:00	30.6	262.19	24.001	24.0017	24.0017	24.0017	24.7401	24.7399	24.0018	24.0018	24.0018	24.0018	24.0018	24.0018	24.0018	24.0018	24.0018	24.0018	24.0018	24.0018	25.9016	623181	29.8438	0.62253	32.2659	24.0019	24.0017
08/03 17:05:00	30.6	248.518	24.0005	24.0012	24.0012	24.0012	24.7782	24.7774	24.0014	24.0014	24.0014	24.0014	24.0015	24.0015	24.0015	24.0014	24.0014	24.0014	24.0014	24.0014	25.9959	609757	29.5704	0.622591	31.8924	24.0019	24.0013
08/03 17:10:00	30.6	235.009	24.0005	24.0011	24.0011	24.001	24.7918	24.7896	24.0013	24.0012	24.0013	24.0012	24.0013	24.0012	24.0013	24.0012	24.0012	24.0012	24.0012	24.0011	26.0266	605737	29.3002	0.621565	31.5283	24.0019	24.0011
08/03 17:15:00	30.6	221.666	24.0005	24.001	24.001	24.001	24.794	24.7909	24.0012	24.0012	24.0012	24.0012	24.0012	24.0012	24.0012	24.0012	24.0011	24.0011	24.0011	24.0011	26.036	603589	29.0333	0.620209	31.1732	24.0018	24.0011
08/03 17:20:00	30.6	208.491	24.0005	24.001	24.001	24.001	24.7929	24.7893	24.0012	24.0012	24.0012	24.0012	24.0012	24.0012	24.0012	24.0012	24.0011	24.0011	24.0011	24.0011	26.0393	602257	28.7698	0.618674	30.827	24.0018	24.0011
08/03 17:25:00	30.6	195.489	24.0005	24.001	24.001	24.0009	24.7913	24.7875	24.0012	24.0012	24.0012	24.0012	24.0012	24.0012	24.0012	24.0012	24.0011	24.0011	24.0011	24.0011	26.0409	601483	28.5098	0.617017	30.4896	24.0018	24.001
08/03 17:30:00	30.6	182.663	24.0005	24.0009	24.0009	24.0009	24.79	24.7862	24.0012	24.0012	24.0012	24.0012	24.0012	24.0012	24.0012	24.0012	24.0011	24.0011	24.0011	24.0011	26.0419	601099	28.2533	0.615278	30.1608	24.0018	24.001
08/03 17:35:00	30.6	167.76	24.0005	24.0009	24.0009	24.0009	24.7894	24.7856	24.0012	24.0012	24.0012	24.0012	24.0012	24.0012	24.0012	24.0012	24.0012	24.0012	24.0012	24.0011	26.0427	600969	27.9552	0.613491	29.8403	24.0018	24.001
08/03 17:40:00	30.6	153.417	24.0005	24.0009	24.0009	24.0009	24.7892	24.7856	24.0012	24.0012	24.0012	24.0012	24.0012	24.0012	24.0012	24.0012	24.0012	24.0012	24.0012	24.0011	26.0433	601015	27.6683	0.611679	29.527	24.0018	24.001
08/03 17:45:00	30.6	139.64	24.0005	24.0009	24.0009	24.0009	24.7894	24.7858	24.0012	24.0012	24.0012	24.0012	24.0012	24.0012	24.0012	24.0012	24.0012	24.0012	24.0012	24.0012	26.0438	601182	27.3928	0.609859	29.2214	24.0018	24.001
08/03 17:50:00	30.6	126.429	24.0005	24.0009	24.0009	24.0009	24.7899	24.7863	24.0012	24.0012	24.0012	24.0012	24.0012	24.0012	24.0012	24.0012	24.0012	24.0012	24.0012	24.0012	26.0438	601434	27.1286	0.608042	28.9244	24.0018	24.001
08/03 17:55:00	30.6	113.789	24.0005	24.0009	24.0009	24.0008	24.7904	24.787	24.0012	24.0012	24.0012	24.0012	24.0012	24.0012	24.0012	24.0012	24.0012	24.0012	24.0012	24.0012	26.0436	601745	26.8758	0.606238	28.6365	24.0017	24.001
08/03 18:00:00	30.6	101.72	24.0005	24.0009	24.0009	24.0008	24.7911	24.7878	24.0012	24.0012	24.0012	24.0012	24.0012	24.0012	24.0012	24.0012	24.0012	24.0012	24.0012	24.0012	26.0431	602100	26.6344	0.604454	28.3584	24.0017	24.001
08/03 18:05:00	30.5	90.2245	23.9384	24.0006	24.0007	24.0007	24.8462	24.8416	24.0013	24.0013	24.0013	24.0013	24.0013	24.0013	24.0013	24.0013	24.0013	24.0013	24.0013	24.0014	26.2926	594328	26.3045	0.602697	28.091	24.0013	24.0009
08/03 18:10:00	30.4	79.3025	23.8799	24.0006	24.0006	24.0006	24.8728	24.8657	24.0014	24.0015	24.0014	24.0015	24.0014	24.0015	24.0015	24.0015	24.0014	24.0015	24.0015	24.0015	26.385	594808	25.9861	0.601411	27.8188	24.0011	24.0009
08/03 18:15:00	30.3	68.9545	23.8379	24.0005	24.0006	24.0006	24.8816	24.8721	24.0015	24.0016	24.0016	24.0019	24.0016	24.0017	24.0016	24.0019	24.0015	24.0016	24.0016	24.0019	26.4125	589301	25.6791	0.600501	27.5427	24.0011	24.0009
08/03 18:20:00	30.2	59.18	23.8067	24.0005	24.0005	24.0005	24.8844	24.8734	24.0016	24.0017	24.0017	24.0021	24.0017	24.0018	24.0017	24.0021	24.0017	24.0017	24.0017	24.002	26.4208	584916	25.3836	0.59931	27.2631	24.0011	24.0009
08/03 18:25:00	30.1	49.9783	23.7826	24.0005	24.0005	24.0005	24.8854	24.8734	24.0017	24.0018	24.0017	24.0022	24.0018	24.0019	24.0018	24.0022	24.0018	24.0018	24.0018	24.0021	26.4231	581551	25.0996	0.597865	26.9809	24.001	24.0009
08/03 18:30:00	30	41.3479	23.7634	24.0005	24.0005	24.0004	24.8858	24.8733	24.0018	24.0019	24.0018	24.0022	24.0018	24.0019	24.0019	24.0022	24.0018	24.0019	24.0019	24.0021	26.4222	578809	24.827	0.596204	26.6968	24.001	24.0009
08/03 18:35:00	29.9	37.1591	23.7475	24.0004	24.0004	24.0004	24.8858	24.8729	24.0018	24.0019	24.0018	24.0022	24.0019	24.002	24.0019	24.0022	24.0019	24.002	24.0019	24.0022	26.4187	576474	24.6432	0.594347	26.4112	24.001	24.0009
08/03 18:40:00	29.8	33.1079	23.734	24.0004	24.0004	24.0003	24.8857	24.8727	24.0019	24.002	24.0019	24.0022	24.0019	24.002	24.002	24.0022	24.002	24.002	24.002	24.0022	26.4134	574360	24.4622	0.592305	26.1352	24.001	24.0009
08/03 18:45:00	29.7	29.1937	23.7222	24.0004	24.0004	24.0003	24.8858	24.8728	24.0019	24.002	24.0019	24.0022	24.002	24.0021	24.002	24.0022	24.002	24.0021	24.002	24.0022	26.4072	572375	24.2839	0.590084	25.8681	24.001	24.0009
08/03 18:50:00	29.6	25.4161	23.7116	24.0004	24.0004	24.0003	24.8861	24.8731	24.0019	24.002	24.002	24.0022	24.002	24.0021	24.002	24.0022	24.002	24.0021	24.0021	24.0022	26.4	570429	24.1083	0.587683	25.609	24.001	24.0009
08/03 18:55:00	29.5	21.7743	23.702	24.0004	24.0004	24.0003	24.8865	24.8736	24.0019	24.002	24.002	24.0022	24.002	24.0021	24.0021	24.0022	24.002	24.0021	24.0021	24.0022	26.3921	568449	23.9355	0.5851	25.3573	24.001	24.0009
08/03 19:00:00	29.4	18.2675	23.6931	24.0004	24.0003	24.0003	24.887	24.8742	24.002	24.0021	24.002	24.0022	24.002	24.0021	24.0021	24.0022	24.0021	24.0022	24.0021	24.0022	26.3834	566507	23.7653	0.582325	25.1123	24.001	24.0009
08/03 19:05:00	29.4	0	23.6848	24.0003	24.0003	24.0002	24.8899	24.8772	24.0019	24.002	24.0019	24.002	24.002	24.0021	24.002	24.002	24.0021	24.0021	24.0021	24.0021	26.3849	564969	23.4	0.579359	24.8732	24.0009	24.0008
08/03 19:10:00	29.4	0	23.6769	24.0003	24.0003	24.0002	24.8923	24.8795	24.002	24.0021	24.0019	24.0019	24.002	24.0021	24.002	24.002	24.0021	24.0022	24.002	24.002	26.3861	564050	23.4	0.576912	24.6311	24.0009	24.0008
08/03 19:15:00	29.4	0	23.6694	24.0003	24.0003	24.0002	24.8938	24.8809	24.002	24.0021	24.0019	24.0019	24.002	24.0021	24.002	24.002	24.0021	24.0022	24.0021	24.002	26.3854	559351	23.4	0.574349	24.4156	24.0009	24.0008
08/03 19:20:00	29.4	0	23.6623	24.0003	24.0003	24.0002	24.8949	24.882	24.002	24.0021	24.0019	24.002	24.0021	24.0022	24.002	24.002	24.0021	24.0022	24.0021	24.0021	26.3834	551958	23.4	0.571853	24.2257	24.0009	24.0008
08/03 19:25:00	29.4	0	23.6554	24.0003	24.0003	24.0002	24.896	24.883	24.002	24.0021	24.0019	24.002	24.0021	24.0022	24.002	24.002	24.0021	24.0022	24.0021	24.0021	26.3806	545655	23.4	0.569107	24.0604	24.0009	24.0008
08/03 19:30:00	29.4	0	23.6487	24.0003	24.0003	24.0002	24.897	24.8841	24.002	24.0021	24.002	24.002	24.0021	24.0022	24.002	24.0021	24.0021	24.0022	24.0021	24.0021	26.3771	540118	23.4	0.566116	23.9188	24.0009	24.0008
08/03 19:35:00	29.4	0	23.6423	24.0003	24.0003	24.0002	24.898	24.8852	24.0021	24.0021	24.002	24.002	24.0021	24.0022	24.0021	24.0021	24.0021	24.0022	24.0021	24.0021	26.373	535171	23.4	0.562891	23.7999	24.0009	24.0008
08/03 19:40:00	29.4	0	23.636	24.0003	24.0002	24.0002	24.899	24.8862	24.0021	24.0022	24.002	24.002	24.0021	24.0022	24.0021	24.0021	24.0022	24.0022	24.0021	24.0021	26.3685	530699	23.4	0.559449	23.6963	24.0009	24.0008
08/03 19:45:00	29.4	0	23.6299	24.0003	24.0002	24.0002	24.9	24.8873	24.0021	24.0022	24.002	24.0021	24.0021	24.0022	24.0021	24.0021	24.0022	24.0023	24.0021	24.0022	26.3634	526616	23.4	0.555811	23.6078	24.0009	24.0008
08/03 19:50:00	29.4	0	23.6239	24.0003	24.0002	24.0002	24.901	24.8884	24.0021	24.0022	24.002	24.0021	24.0021	24.0022	24.0021	24.0021	24.0022	24.0023	24.0022	24.0022	26.358	522859	23.4	0.551998	23.5341	24.0009	24.0008
08/03 19:55:00	29.4	0	23.6181	24.0003	24.0002	24.0002	24.9019	24.8895	24.0021	24.0022	24.002	24.0021	24.0021	24.0022	24.0021	24.0022	24.0022	24.0023	24.0022	24.0022	26.3521	519378	23.4	0.548034	23.4751	24.0009	24.0008
08/03 20:00:00	29.4	0	23.6123	24.0002	24.0002	24.0002	24.9028	24.8905	24.0021	24.0022	24.0021	24.0021	24.0022	24.0022	24.0021	24.0022	24.0022	24.0023	24.0022	24.0022	26.3459	516132	23.4	0.543944	23.4304	24.0009	24.0008
08/03 20:05:00	29.125	0	23.5847	23.9789	24.0002	24.0001	24.9035	24.894	24.0021	24.0022	24.002	24.0021	24.0021	24.0022	24.0021	24.0021	24.0021	24.0022	24.0021	24.0022	26.333	508023	23.125	0.539746	23.4	24.0008	24.0008
08/03 20:10:00	28.85	0	23.5651	23.9624	24.0002	24.0001	24.902	24.8956	24.0021	24.0022	24.002	24.0021	24.0021	24.0022	24.0021	24.0021	24.0021	24.0022	24.0021	24.0022	26.3088	498511	22.85	0.535001	23.3771	24.0008	24.0008
08/03 20:15:00	28.575	0	23.5506	23.9498	24.0002	24.0001	24.8991	24.896	24.0021	24.0021	24.002	24.0021	24.0021	24.0022	24.0021	24.0021	24.0021	24.0022	24.0021	24.0022	26.2783	491274	22.575	0.529539	23.3313	24.0008	24.0008
08/03 20:20:00	28.3	0	23.5392	23.9395	24.0002	24.0001	24.8955	24.8955	24.002	24.0021	24.002	24.0021	24.0021	24.0022	24.0021	24.0022	24.0021	24.0022	24.0021	24.0022	26.2442	485063	22.3	0.523866	23.2625	24.0008	24.0008
08/03 20:25:00	28.025	0	23.5298	23.9306	24.0002	24.0001	24.8916	24.8946	24.002	24.0021	24.002	24.0021	24.0021	24.0022	24.0021	24.0022	24.0021	24.0022	24.0021	24.0022	26.2082	479266	22.025	0.518292	23.1708	24.0008	24.0008
08/03 20:30:00	27.75	0	23.5217	23.9225	24.0002	24.0001	24.8875	24.8934	24.002	24.0021	24.002	24.0021	24.0021	24.0022	24.0021	24.0022	24.0021	24.0022	24.0021	24.0022	26.1708	473652	21.75	0.512759	23.0563	24.0008	24.0008
08/03 20:35:00	27.475	0	23.5144	23.9149	24.0002	24.0001	24.8834	24.892	24.002	24.0021	24.002	24.0021	24.0021	24.0022	24.002	24.0022	24.0021	24.0022	24.0021	24.0022	26.1323	468127	21.475	0.50722	22.9187	24.0008	24.0008
08/03 20:40:00	27.2	0	23.5077	23.9078	23.9988	24.0001	24.8792	24.8903	24.002	24.0021	24.002	24.0021	24.0021	24.0022	24.002	24.0022	24.0021	24.0022	24.0021	24.0022	26.0929	462819	21.2	0.501633	22.7583	24.0008	23.9998
08/03 20:45:00	26.925	0	23.5013	23.9009	23.9951	24.0001	24.8749	24.8882	24.002	24.0021	24.002	24.0021	24.0021	24.0022	24.002	24.0022	24.0021	24.0022	24.0021	24.0022	26.0528	457908	20.925	0.495977	22.575	24.0008	23.9973
08/03 20:50:00	26.65	0	23.4952	23.8942	23.9902	24.0001	24.8707	24.8856	24.002	24.0021	24.0019	24.0021	24.0021	24.0022	24.002	24.0022	24.0021	24.0022	24.0021	24.0022	26.012	453267	20.65	0.490251	22.3687	24.0008	23.9939
08/03 20:55:00	26.375	0	23.4892	23.8877	23.9846	24.0001	24.8664	24.8826	24.002	24.0021	24.0019	24.0021	24.002	24.0021	24.002	24.0021	24.0021	24.0022	24.0021	24.0022	25.9705	448711	20.375	0.484452	22.1396	24.0008	23.99
08/03 21:00:00	26.1	0	23.4834	23.8813	23.9787	24.0001	24.8622	24.8794	24.002	24.0021	24.0019	24.0021	24.002	24.0021	24.002	24.0021	24.0021	24.0022	24.0021	24.0022	25.9284	444178	20.1	0.478563	21.8875	24.0008	23.9858
08/03 21:05:00	26.0583	0	23.479	23.8763	23.9737	24.1341	24.8681	24.8903	24.1499	24.1138	24.1398	24.1466	24.2048	24.1729	24.2113	24.2184	24.3197	24.3044	24.3344	24.3109	25.9831	420426	20.0583	0.472567	21.6125	24.0008	24.044
08/03 21:10:00	26.0167	0	23.4722	23.8684	23.9656	24.258	24.8777	24.9072	24.2646	24.1945	24.2471	24.2517	24.3597	24.2955	24.3712	24.3734	24.5596	24.5229	24.5857	24.5291	26.0361	399833	20.0167	0.465267	21.3569	24.0008	24.0845
08/03 21:15:00	25.975	0	23.4666	23.8622	23.9591	24.3071	24.8836	24.9175	24.3001	24.2158	24.2799	24.281	24.408	24.3295	24.4208	24.4175	24.6372	24.5895	24.6672	24.5935	26.0539	392179	19.975	0.457044	21.1208	24.0008	24.0939
08/03 21:20:00	25.9333	0	23.4612	23.8564	23.953	24.3355	24.8877	24.9247	24.3162	24.2231	24.2943	24.2925	24.4305	24.3429	24.4436	24.4359	24.6767	24.6216	24.7085	24.6235	26.0605	390214	19.9333	0.448786	20.9042	24.0008	24.0958
08/03 21:25:00	25.8917	0	23.4558	23.8508	23.9472	24.3524	24.8901	24.9295	24.323	24.224	24.2998	24.296	24.4407	24.3469	24.4535	24.4427	24.6981	24.6379	24.7306	24.638	26.0597	390635	19.8917	0.440882	20.7069	24.0008	24.0943
08/03 21:30:00	25.85	0	23.4504	23.8455	23.9415	24.3627	24.8911	24.9323	24.3249	24.2215	24.3006	24.2953	24.4444	24.3461	24.4566	24.4435	24.7102	24.6463	24.7429	24.6447	26.054	392106	19.85	0.433496	20.5292	24.0008	24.091
08/03 21:35:00	25.8083	0	23.4451	23.8402	23.936	24.3688	24.8912	24.9335	24.324	24.217	24.2987	24.2922	24.4446	24.3426	24.4561	24.441	24.7171	24.6502	24.7497	24.6472	26.0451	394070	19.8083	0.4267	20.3708	24.0008	24.0868
08/03 21:40:00	25.7667	0	23.4398	23.8351	23.9305	24.3724	24.8904	24.9336	24.3213	24.2114	24.2952	24.2877	24.4425	24.3375	24.4532	24.4366	24.7208	24.6515	24.753	24.647	26.0339	396282	19.7667	0.420529	20.2319	23.9998	24.0819
08/03 21:45:00	25.725	0	23.4346	23.83	23.925	24.3742	24.889	24.9328	24.3175	24.2051	24.2906	24.2823	24.4392	24.3313	24.449	24.4309	24.7224	24.6508	24.7541	24.6451	26.0211	398631	19.725	0.414984	20.1125	23.9973	24.0767
08/03 21:50:00	25.6833	0	23.4294	23.825	23.9196	24.3748	24.8872	24.9314	24.3129	24.1982	24.2852	24.2761	24.4347	24.3244	24.4437	24.4242	24.7223	24.6488	24.7535	24.6418	26.007	401063	19.6833	0.410044	20.0125	23.9939	24.0712
08/03 21:55:00	25.6417	0	23.4242	23.8199	23.9141	24.3745	24.885	24.9295	24.3076	24.1907	24.2792	24.2694	24.4295	24.3168	24.4376	24.4168	24.7211	24.6457	24.7517	24.6374	25.992	403549	19.6417	0.405694	19.9319	23.99	24.0655
08/03 22:00:00	25.6	0	23.4191	23.8149	23.9086	24.3734	24.8825	24.9272	24.3017	24.1828	24.2728	24.2623	24.4237	24.3089	24.431	24.4088	24.7189	24.6418	24.7489	24.6321	25.9761	406074	19.6	0.401931	19.8708	23.9858	24.0596
08/03 22:05:00	25.6	0	23.414	23.8099	23.903	24.3718	24.88	24.9248	24.2965	24.1755	24.267	24.2557	24.4183	24.3014	24.4248	24.4014	24.7168	24.638	24.7462	24.6271	25.9623	407946	19.6	0.398755	19.8292	24.044	24.0538
08/03 22:10:00	25.6	0	23.4089	23.8049	23.8975	24.3697	24.8774	24.9223	24.2913	24.1684	24.2612	24.2491	24.4131	24.2941	24.4187	24.3939	24.7143	24.6339	24.7431	24.6218	25.9492	409104	19.6	0.397715	19.791	24.0845	24.048
08/03 22:15:00	25.6	0	23.4039	23.7998	23.8919	24.3672	24.8749	24.9198	24.286	24.1612	24.2554	24.2425	24.4077	24.2867	24.4124	24.3864	24.7115	24.6295	24.7397	24.6161	25.9365	409858	19.6	0.398488	19.7563	24.0939	24.0421
08/03 22:20:00	25.6	0	23.3988	23.7948	23.8863	24.3644	24.8723	24.9172	24.2806	24.1541	24.2494	24.2358	24.4021	24.2791	24.4061	24.3787	24.7083	24.6246	24.7358	24.6101	25.9237	410333	19.6	0.399961	19.725	24.0958	24.0362
08/03 22:25:00	25.6	0	23.3938	23.7897	23.8807	24.3612	24.8697	24.9145	24.2751	24.1468	24.2434	24.229	24.3964	24.2714	24.3995	24.3709	24.7046	24.6193	24.7316	24.6037	25.9109	410610	19.6	0.401637	19.6972	24.0943	24.0303
08/03 22:30:00	25.6	0	23.3888	23.7847	23.8751	24.3578	24.867	24.9118	24.2694	24.1395	24.2373	24.222	24.3906	24.2637	24.3929	24.3629	24.7006	24.6137	24.7269	24.597	25.8979	410741	19.6	0.403302	19.6729	24.091	24.0243
08/03 22:35:00	25.6	0	23.3839	23.7797	23.8694	24.3541	24.8643	24.909	24.2636	24.1321	24.2311	24.2149	24.3846	24.2558	24.3861	24.3548	24.6962	24.6078	24.7219	24.5899	25.8848	410762	19.6	0.404855	19.6521	24.0868	24.0182
08/03 22:40:00	25.6	0	23.3789	23.7746	23.8638	24.3502	24.8616	24.9061	24.2576	24.1246	24.2248	24.2077	24.3785	24.2478	24.3792	24.3465	24.6916	24.6016	24.7166	24.5826	25.8714	410694	19.6	0.406246	19.6347	24.0819	24.0121
08/03 22:45:00	25.6	0	23.374	23.7696	23.8582	24.3461	24.8588	24.9032	24.2516	24.1171	24.2184	24.2005	24.3722	24.2397	24.3722	24.3382	24.6866	24.5951	24.7111	24.575	25.8579	410553	19.6	0.407447	19.6208	24.0767	24.006
08/03 22:50:00	25.6	0	23.3691	23.7645	23.8525	24.3419	24.856	24.9003	24.2455	24.1095	24.2119	24.1931	24.3659	24.2316	24.3651	24.3298	24.6813	24.5883	24.7052	24.5672	25.8443	410349	19.6	0.40844	19.6104	24.0712	23.9999
08/03 22:55:00	25.6	0	23.3642	23.7595	23.8469	24.3374	24.8532	24.8973	24.2393	24.1019	24.2054	24.1857	24.3595	24.2234	24.3579	24.3213	24.6759	24.5814	24.6991	24.5592	25.8305	410089	19.6	0.409214	19.6035	24.0655	23.9937
08/03 23:00:00	25.6	0	23.3593	23.7544	23.8413	24.3328	24.8503	24.8943	24.2331	24.0943	24.1988	24.1782	24.353	24.2152	24.3507	24.3127	24.6701	24.5742	24.6928	24.5509	25.8166	409780	19.6	0.409759	19.6	24.0596	23.9875
08/03 23:05:00	25.6417	0	23.3545	23.7494	23.8356	24.328	24.8476	24.8914	24.2279	24.0878	24.1933	24.1718	24.3475	24.2078	24.3445	24.3052	24.6653	24.5677	24.6873	24.5436	25.8052	409636	19.6417	0.410068	19.6	24.0538	23.9816
08/03 23:10:00	25.6833	0	23.3497	23.7444	23.83	24.3231	24.845	24.8887	24.2232	24.0817	24.1883	24.1659	24.3425	24.2009	24.3388	24.2981	24.6607	24.5616	24.6822	24.5366	25.7951	409676	19.6833	0.410209	19.6035	24.048	23.9759
08/03 23:15:00	25.725	0	23.3448	23.7393	23.8244	24.3181	24.8426	24.8861	24.2185	24.0759	24.1836	24.1601	24.3376	24.1944	24.3333	24.2912	24.6562	24.5557	24.6772	24.5296	25.7858	409804	19.725	0.410257	19.6104	24.0421	23.9703
08/03 23:20:00	25.7667	0	23.34	23.7343	23.8188	24.313	24.8402	24.8836	24.2141	24.0702	24.1789	24.1545	24.3329	24.1879	24.328	24.2845	24.6517	24.5498	24.6722	24.5227	25.7769	409981	19.7667	0.410252	19.6208	24.0362	23.9646
08/03 23:25:00	25.8083	0	23.3352	23.7293	23.8132	24.3078	24.8379	24.8811	24.2098	24.0646	24.1742	24.1489	24.3283	24.1816	24.3226	24.2778	24.6473	24.5439	24.6672	24.5159	25.7684	410183	19.8083	0.410223	19.6347	24.0303	23.9591
08/03 23:30:00	25.85	0	23.3304	23.7243	23.8076	24.3025	24.8357	24.8786	24.2054	24.059	24.1697	24.1434	24.3236	24.1754	24.3174	24.2711	24.6428	24.5379	24.6621	24.5089	25.7601	410395	19.85	0.410187	19.6521	24.0243	23.9535
08/03 23:35:00	25.8917	0	23.3257	23.7193	23.8021	24.2971	24.8334	24.8761	24.2012	24.0535	24.1653	24.1379	24.3191	24.1692	24.3123	24.2645	24.6382	24.532	24.657	24.5019	25.752	410606	19.8917	0.410158	19.6729	24.0182	23.948
08/03 23:40:00	25.9333	0	23.3209	23.7143	23.7966	24.2917	24.8311	24.8737	24.197	24.0481	24.1608	24.1324	24.3147	24.1631	24.3072	24.258	24.6337	24.5261	24.652	24.495	25.7441	410811	19.9333	0.410145	19.6972	24.0121	23.9425
08/03 23:45:00	25.975	0	23.3162	23.7094	23.791	24.2862	24.8289	24.8712	24.1929	24.0428	24.1564	24.1269	24.3102	24.157	24.3021	24.2516	24.6291	24.5201	24.6469	24.4881	25.7363	411006	19.975	0.410155	19.725	24.006	23.9371
08/03 23:50:00	26.0167	0	23.3115	23.7044	23.7856	24.2807	24.8267	24.8688	24.1887	24.0375	24.1522	24.1215	24.3058	24.151	24.2971	24.2451	24.6245	24.5141	24.6418	24.4812	25.7288	411190	20.0167	0.410193	19.7563	23.9999	23.9317
08/03 23:55:00	26.0583	0	23.3067	23.6995	23.7801	24.2751	24.8244	24.8664	24.1847	24.0322	24.1479	24.1162	24.3015	24.1451	24.2922	24.2387	24.6199	24.5082	24.6366	24.4742	25.7214	411361	20.0583	0.410263	19.791	23.9937	23.9263
08/03 24:00:00	26.1	0	23.302	23.6946	23.7746	24.2695	24.8222	24.8639	24.1806	24.027	24.1437	24.111	24.2971	24.1392	24.2872	24.2325	24.6153	24.5022	24.6315	24.4672	25.7142	411519	20.1	0.410369	19.8292	23.9875	23.9209
08/04 00:05:00	26.1	0	23.3487	23.7372	23.8166	24.3113	24.82	24.8616	24.2194	24.0639	24.1824	24.1477	24.3356	24.1753	24.3251	24.2681	24.6533	24.5382	24.6691	24.502	25.7048	411636	20.1	0.410514	19.8708	23.9816	23.9614
08/04 00:10:00	26.1	0	23.3784	23.7632	23.8417	24.3362	24.8217	24.8634	24.2382	24.08	24.2013	24.1636	24.3538	24.1904	24.3429	24.2828	24.6709	24.5531	24.6864	24.5156	25.6983	411720	20.1	0.410681	19.909	23.9759	23.984
08/04 00:15:00	26.1	0	23.3965	23.7789	23.8564	24.3507	24.8246	24.8665	24.2472	24.0867	24.2103	24.1701	24.3622	24.1962	24.3509	24.288	24.6787	24.5586	24.6938	24.5198	25.6924	411839	20.1	0.410851	19.9438	23.9703	23.9964
08/04 00:20:00	26.1	0	23.4074	23.7885	23.8651	24.3591	24.8277	24.8696	24.2513	24.0889	24.2144	24.1721	24.3659	24.1976	24.3541	24.2889	24.6818	24.5597	24.6965	24.5198	25.6862	411943	20.1	0.411021	19.975	23.9646	24.0033
08/04 00:25:00	26.1	0	23.4136	23.7944	23.8702	24.3639	24.8303	24.8722	24.2528	24.0889	24.2159	24.1719	24.3671	24.1968	24.3549	24.2877	24.6824	24.5586	24.6968	24.5176	25.6794	412040	20.1	0.411184	20.0028	23.9591	24.0068
08/04 00:30:00	26.1	0	23.4168	23.7979	23.873	24.3663	24.8322	24.8741	24.2529	24.0876	24.216	24.1704	24.3668	24.1948	24.3542	24.2852	24.6817	24.5563	24.6956	24.5143	25.672	412125	20.1	0.411339	20.0271	23.9535	24.0084
08/04 00:35:00	26.1	0	23.418	23.7998	23.8744	24.3673	24.8336	24.8753	24.2521	24.0855	24.2151	24.1681	24.3658	24.1921	24.3527	24.282	24.68	24.5532	24.6935	24.5102	25.6641	412198	20.1	0.411483	20.0479	23.948	24.0088
08/04 00:40:00	26.1	0	23.418	23.8007	23.8748	24.3673	24.8343	24.8759	24.2507	24.0828	24.2135	24.1652	24.3642	24.1889	24.3506	24.2783	24.6778	24.5496	24.6909	24.5056	25.6559	412257	20.1	0.411616	20.0653	23.9425	24.0083
08/04 00:45:00	26.1	0	23.4171	23.8009	23.8745	24.3665	24.8346	24.876	24.2488	24.0798	24.2115	24.1619	24.3621	24.1853	24.3481	24.2742	24.6752	24.5456	24.6879	24.5007	25.6474	412301	20.1	0.411736	20.0792	23.9371	24.0073
08/04 00:50:00	26.1	0	23.4157	23.8005	23.8738	24.3653	24.8344	24.8757	24.2465	24.0764	24.2092	24.1583	24.3598	24.1814	24.3453	24.2699	24.6722	24.5413	24.6845	24.4954	25.6388	412333	20.1	0.411844	20.0896	23.9317	24.0058
08/04 00:55:00	26.1	0	23.4138	23.7997	23.8728	24.3637	24.8339	24.8751	24.244	24.0728	24.2065	24.1545	24.3572	24.1774	24.3422	24.2653	24.6689	24.5368	24.6808	24.49	25.6299	412353	20.1	0.411939	20.0965	23.9263	24.0041
08/04 01:00:00	26.1	0	23.4116	23.7985	23.8714	24.3618	24.8331	24.8742	24.2412	24.0689	24.2036	24.1503	24.3543	24.1731	24.339	24.2605	24.6654	24.532	24.6769	24.4843	25.621	412364	20.1	0.412022	20.1	23.9209	24.002
08/04 01:05:00	25.8667	0	23.4093	23.7971	23.8699	24.3597	24.8308	24.8719	24.2326	24.0592	24.195	24.1403	24.3457	24.1629	24.3299	24.2499	24.6561	24.5213	24.6672	24.4727	25.597	411132	19.8667	0.412093	20.1	23.9614	23.9981
08/04 01:10:00	25.6333	0	23.4068	23.7955	23.8681	24.3573	24.8274	24.8684	24.221	24.0465	24.1832	24.1275	24.3341	24.1499	24.3179	24.2364	24.6438	24.5077	24.6545	24.4583	25.5641	408603	19.6333	0.412051	20.0806	23.984	23.9931
08/04 01:15:00	25.4	0	23.4042	23.7936	23.8663	24.3548	24.8231	24.8641	24.2077	24.0322	24.1697	24.113	24.3208	24.1353	24.3042	24.2213	24.6298	24.4925	24.6401	24.4422	25.5263	405380	19.4	0.411791	20.0417	23.9964	23.9875
08/04 01:20:00	25.1667	0	23.4015	23.7916	23.8642	24.352	24.8181	24.8592	24.1931	24.0168	24.155	24.0973	24.3064	24.1197	24.2893	24.2052	24.6145	24.4761	24.6244	24.4251	25.4855	401718	19.1667	0.411252	19.9833	24.0033	23.9815
08/04 01:25:00	24.9333	0	23.3987	23.7894	23.8621	24.3489	24.8126	24.8538	24.1778	24.0007	24.1395	24.0809	24.2912	24.1033	24.2737	24.1883	24.5983	24.4588	24.6079	24.4071	25.4432	397778	18.9333	0.4104	19.9056	24.0068	23.9751
08/04 01:30:00	24.7	0	23.3959	23.7871	23.8598	24.3455	24.8066	24.848	24.1618	23.9839	24.1234	24.0639	24.2753	24.0862	24.2577	24.1708	24.5813	24.4407	24.5907	24.3883	25.3999	393667	18.7	0.409212	19.8083	24.0084	23.9685
08/04 01:35:00	24.4667	0	23.3931	23.7847	23.8574	24.3419	24.8004	24.8419	24.1453	23.9666	24.1067	24.0464	24.2589	24.0687	24.241	24.1528	24.5637	24.4221	24.5728	24.3689	25.3561	389453	18.4667	0.407674	19.6917	24.0088	23.9616
08/04 01:40:00	24.2333	0	23.3902	23.7821	23.8549	24.3379	24.7939	24.8357	24.1283	23.9488	24.0896	24.0284	24.242	24.0508	24.2238	24.1344	24.5455	24.4028	24.5542	24.3489	25.3119	385182	18.2333	0.405778	19.5556	24.0083	23.9545
08/04 01:45:00	24	0	23.3873	23.7793	23.8522	24.3336	24.7872	24.8292	24.1108	23.9306	24.0719	24.0098	24.2246	24.0323	24.2061	24.1154	24.5265	24.3828	24.5349	24.3282	25.2673	380885	18	0.403522	19.4	24.0073	23.9472
08/04 01:50:00	23.7667	0	23.3843	23.7764	23.8494	24.329	24.7804	24.8225	24.0929	23.9119	24.0539	23.9909	24.2069	24.0134	24.188	24.096	24.507	24.3622	24.515	24.307	25.2223	376582	17.7667	0.400904	19.225	24.0058	23.9396
08/04 01:55:00	23.5333	0	23.3813	23.7735	23.8466	24.3241	24.7734	24.8157	24.0746	23.893	24.0356	23.9718	24.1886	23.9943	24.1696	24.0764	24.4869	24.3413	24.4947	24.2854	25.1771	372286	17.5333	0.397925	19.0306	24.0041	23.9319
08/04 02:00:00	23.3	0	23.3784	23.7704	23.8437	24.3189	24.7662	24.8088	24.0561	23.8738	24.017	23.9523	24.1702	23.9748	24.1509	24.0564	24.4665	24.3199	24.474	24.2633	25.1317	414724	17.3	0.394586	18.8167	24.002	23.9241
08/04 02:05:00	23.3917	0	23.3754	23.7673	23.8407	24.3137	24.7607	24.8035	24.0452	23.8624	24.006	23.9406	24.1593	23.9632	24.1398	24.0443	24.4536	24.3062	24.4608	24.2489	25.1065	415184	17.3917	0.394782	18.5833	23.9981	23.9185
08/04 02:10:00	23.4833	0	23.3724	23.7641	23.8377	24.3082	24.7565	24.7994	24.0378	23.8545	23.9987	23.9324	24.152	23.955	24.1323	24.0356	24.4441	24.2959	24.451	24.2379	25.0914	384403	17.4833	0.39512	18.3771	23.9931	23.9141
08/04 02:15:00	23.575	0	23.3694	23.7609	23.8346	24.3026	24.7531	24.7961	24.0324	23.8484	23.9933	23.926	24.1466	23.9485	24.1266	24.0286	24.4364	24.2873	24.4431	24.2285	25.0816	372545	17.575	0.393104	18.1979	23.9875	23.9101
08/04 02:20:00	23.6667	0	23.3664	23.7576	23.8315	24.297	24.7504	24.7935	24.0281	23.8433	23.989	23.9206	24.1423	23.9431	24.1221	24.0226	24.4298	24.2797	24.4363	24.2201	25.075	368152	17.6667	0.390367	18.0458	23.9815	23.9064
08/04 02:25:00	23.7583	0	23.3633	23.7543	23.8284	24.2914	24.7481	24.7913	24.0246	23.839	23.9856	23.9159	24.1386	23.9383	24.1184	24.0174	24.4239	24.2728	24.4302	24.2124	25.0703	366928	17.7583	0.38757	17.9208	23.9751	23.903
08/04 02:30:00	23.85	0	23.3603	23.7511	23.8253	24.2859	24.7461	24.7893	24.0217	23.8352	23.9827	23.9117	24.1357	23.934	24.1151	24.0126	24.4187	24.2665	24.4248	24.2053	25.0671	367139	17.85	0.384999	17.8229	23.9685	23.8997
08/04 02:35:00	23.9417	0	23.3573	23.7478	23.8222	24.2805	24.7444	24.7877	24.0192	23.8318	23.9803	23.908	24.1332	23.9301	24.1123	24.0082	24.414	24.2606	24.4198	24.1986	25.0648	368056	17.9417	0.382789	17.7521	23.9616	23.8966
08/04 02:40:00	24.0333	0	23.3542	23.7445	23.8191	24.2751	24.7428	24.7862	24.0171	23.8288	23.9782	23.9046	24.1309	23.9265	24.1098	24.0041	24.4096	24.2551	24.4152	24.1923	25.0635	369361	18.0333	0.381006	17.7083	23.9545	23.8935
08/04 02:45:00	24.125	0	23.3512	23.7412	23.816	24.2699	24.7414	24.7848	24.0152	23.8261	23.9764	23.9015	24.1288	23.9232	24.1075	24.0003	24.4055	24.25	24.411	24.1863	25.0628	370903	18.125	0.379687	17.6917	23.9472	23.8906
08/04 02:50:00	24.2167	0	23.3482	23.738	23.8129	24.2647	24.7401	24.7835	24.0136	23.8236	23.9749	23.8986	24.127	23.9202	24.1056	23.9968	24.4018	24.2451	24.407	24.1807	25.0629	372608	18.2167	0.378855	17.7021	23.9396	23.8877
08/04 02:55:00	24.3083	0	23.3451	23.7347	23.8099	24.2596	24.7389	24.7822	24.0122	23.8214	23.9736	23.896	24.1255	23.9174	24.1038	23.9934	24.3983	24.2406	24.4034	24.1753	25.0634	374437	18.3083	0.378524	17.7396	23.9319	23.8849
08/04 03:00:00	24.4	0	23.3421	23.7315	23.8069	24.2546	24.7377	24.7811	24.011	23.8194	23.9726	23.8936	24.1241	23.9148	24.1022	23.9903	24.395	24.2363	24.3999	24.1702	25.0645	376366	18.4	0.378703	17.8042	23.9241	23.8822
08/04 03:05:00	24.4	0	23.339	23.7283	23.8039	24.2497	24.7361	24.7795	24.0078	23.8153	23.9695	23.8892	24.1207	23.9101	24.0987	23.9852	24.3898	24.2299	24.3946	24.1631	25.0602	377806	18.4	0.375507	17.8958	23.9185	23.8789
08/04 03:10:00	24.4	0	23.336	23.7251	23.8009	24.2448	24.7343	24.7776	24.0037	23.8104	23.9655	23.8839	24.1164	23.9046	24.0942	23.9791	24.3838	24.2228	24.3883	24.1551	25.0533	378694	18.4	0.372392	17.9799	23.9141	23.8753
08/04 03:15:00	24.4	0	23.333	23.7219	23.7979	24.2399	24.7321	24.7755	23.9992	23.805	23.961	23.8781	24.1116	23.8987	24.0893	23.9727	24.3772	24.2152	24.3816	24.1468	25.045	379281	18.4	0.371916	18.0563	23.9101	23.8716
08/04 03:20:00	24.4	0	23.3299	23.7188	23.7949	24.2351	24.7298	24.7733	23.9944	23.7995	23.9563	23.8722	24.1066	23.8925	24.0841	23.9661	24.3705	24.2074	24.3747	24.1383	25.0359	379670	18.4	0.372478	18.125	23.9064	23.8678
08/04 03:25:00	24.4	0	23.3269	23.7156	23.7919	24.2302	24.7274	24.7709	23.9895	23.7938	23.9515	23.8662	24.1015	23.8863	24.0788	23.9594	24.3636	24.1995	24.3676	24.1296	25.0263	379930	18.4	0.373437	18.1861	23.903	23.864
08/04 03:30:00	24.4	0	23.3239	23.7125	23.7889	24.2253	24.7249	24.7684	23.9845	23.7881	23.9466	23.8601	24.0963	23.88	24.0734	23.9526	24.3566	24.1916	24.3604	24.1209	25.0164	380104	18.4	0.374521	18.2396	23.8997	23.8602
08/04 03:35:00	24.4	0	23.3209	23.7093	23.786	24.2204	24.7224	24.7659	23.9795	23.7824	23.9416	23.854	24.0911	23.8737	24.068	23.9458	24.3495	24.1836	24.3532	24.1122	25.0064	380224	18.4	0.375601	18.2854	23.8966	23.8564
08/04 03:40:00	24.4	0	23.3179	23.7061	23.783	24.2154	24.7198	24.7633	23.9744	23.7766	23.9366	23.8478	24.0858	23.8674	24.0626	23.939	24.3424	24.1755	24.3459	24.1034	24.9963	380307	18.4	0.376615	18.3236	23.8935	23.8525
08/04 03:45:00	24.4	0	23.3149	23.703	23.78	24.2104	24.7172	24.7607	23.9693	23.7708	23.9316	23.8417	24.0805	23.861	24.0571	23.9321	24.3352	24.1674	24.3385	24.0946	24.986	380367	18.4	0.377528	18.3542	23.8906	23.8487
08/04 03:50:00	24.4	0	23.3119	23.6998	23.777	24.2054	24.7145	24.7581	23.9642	23.765	23.9266	23.8355	24.0752	23.8547	24.0517	23.9253	24.328	24.1592	24.3312	24.0857	24.9758	380410	18.4	0.378316	18.3771	23.8877	23.8448
08/04 03:55:00	24.4	0	23.3089	23.6966	23.774	24.2003	24.7118	24.7555	23.9591	23.7591	23.9215	23.8293	24.0699	23.8483	24.0462	23.9184	24.3208	24.1511	24.3238	24.0768	24.9655	380441	18.4	0.378966	18.3924	23.8849	23.8409
08/04 04:00:00	24.4	0	23.3059	23.6935	23.771	24.1952	24.7091	24.7528	23.954	23.7533	23.9165	23.8231	24.0646	23.842	24.0407	23.9116	24.3135	24.1429	24.3163	24.068	24.9551	380465	18.4	0.379467	18.4	23.8822	23.8371
08/04 04:05:00	24.3583	0	23.3029	23.6903	23.768	24.19	24.7062	24.7499	23.9478	23.7464	23.9104	23.8159	24.0582	23.8345	24.0342	23.9037	24.3052	24.1336	24.3079	24.058	24.9422	380598	18.3583	0.379808	18.4	23.8789	23.8329
08/04 04:10:00	24.3167	0	23.2999	23.6875	23.7653	24.1852	24.7031	24.7468	23.9412	23.7391	23.9038	23.8082	24.0513	23.8267	24.0272	23.8953	24.2964	24.1239	24.2989	24.0476	24.9278	380847	18.3167	0.380041	18.3965	23.8753	23.8287
08/04 04:15:00	24.275	0	23.2969	23.6845	23.7625	24.1801	24.6998	24.7437	23.9342	23.7316	23.897	23.8002	24.0442	23.8186	24.02	23.8867	24.2873	24.1139	24.2896	24.0369	24.9127	381164	18.275	0.38022	18.3896	23.8716	23.8244
08/04 04:20:00	24.2333	0	23.294	23.6814	23.7596	24.1749	24.6965	24.7404	23.9271	23.7238	23.89	23.7921	24.0369	23.8103	24.0125	23.878	24.2779	24.1037	24.2801	24.026	24.8971	381530	18.2333	0.380377	18.3792	23.8678	23.82
08/04 04:25:00	24.1917	0	23.291	23.6783	23.7566	24.1697	24.6931	24.737	23.9199	23.716	23.8828	23.7839	24.0295	23.802	24.005	23.8691	24.2685	24.0934	24.2705	24.015	24.8812	381932	18.1917	0.380532	18.3653	23.864	23.8156
08/04 04:30:00	24.15	0	23.2881	23.6752	23.7537	24.1644	24.6897	24.7336	23.9126	23.7081	23.8756	23.7756	24.0219	23.7935	23.9973	23.8602	24.2588	24.083	24.2607	24.0039	24.8651	382359	18.15	0.380699	18.3479	23.8602	23.8111
08/04 04:35:00	24.1083	0	23.2851	23.672	23.7507	24.1589	24.6861	24.7302	23.9052	23.7001	23.8683	23.7672	24.0143	23.785	23.9896	23.8512	24.2491	24.0724	24.2508	23.9927	24.8489	382807	18.1083	0.380887	18.3271	23.8564	23.8065
08/04 04:40:00	24.0667	0	23.2822	23.6688	23.7476	24.1535	24.6826	24.7267	23.8978	23.6921	23.8609	23.7588	24.0067	23.7765	23.9818	23.8421	24.2393	24.0618	24.2409	23.9813	24.8326	383271	18.0667	0.381102	18.3028	23.8525	23.8019
08/04 04:45:00	24.025	0	23.2792	23.6656	23.7446	24.148	24.679	24.7231	23.8903	23.684	23.8535	23.7503	23.9989	23.7678	23.974	23.833	24.2294	24.0511	24.2308	23.97	24.8162	383748	18.025	0.381349	18.275	23.8487	23.7973
08/04 04:50:00	23.9833	0	23.2763	23.6624	23.7415	24.1424	24.6754	24.7196	23.8827	23.6758	23.846	23.7418	23.9912	23.7592	23.9661	23.8238	24.2194	24.0403	24.2207	23.9585	24.7998	384234	17.9833	0.381631	18.2437	23.8448	23.7927
08/04 04:55:00	23.9417	12.5071	23.2734	23.6592	23.7385	24.1367	24.6719	24.7161	23.8842	23.6915	23.853	23.743	23.9925	23.7745	23.9728	23.8244	24.2184	24.0534	24.2251	23.9568	24.7834	384730	18.1918	0.38195	18.209	23.8409	23.7922
08/04 05:00:00	23.9	15.0235	23.2704	23.6561	23.7355	24.1311	24.6691	24.7134	23.8875	23.7075	23.8612	23.7459	23.9956	23.79	23.9807	23.8266	24.2193	24.0667	24.2307	23.9567	24.7679	385233	18.2005	0.382307	18.1917	23.8371	23.7922
08/04 05:05:00	23.9	17.5449	23.2969	23.6811	23.7605	24.0031	24.6673	24.7113	23.917	23.7438	23.8937	23.7743	24.0022	23.8253	24.0018	23.8542	24.0107	24.0048	24.0111	23.9745	24.7381	388809	18.2509	0.382704	18.1751	23.8329	23.8158
08/04 05:10:00	23.9	20.0715	23.3144	23.6973	23.7766	24.0001	24.6685	24.7119	23.9362	23.7659	23.9143	23.7919	24.0024	23.8466	24.0023	23.8709	24.0031	24.0027	24.0031	23.9952	24.7141	390237	18.3014	0.383389	18.1661	23.8287	23.8292
08/04 05:15:00	23.9	22.6031	23.3253	23.7075	23.7867	24	24.6708	24.7135	23.9499	23.7805	23.9284	23.8042	24.0024	23.8606	24.0024	23.8825	24.0028	24.0026	24.0028	24.0022	24.6987	387986	18.3521	0.384171	18.1648	23.8244	23.8377
08/04 05:20:00	23.9	25.14	23.3321	23.7141	23.7932	24	24.6733	24.7153	23.9612	23.7915	23.9396	23.8142	24.0024	23.871	24.0024	23.8919	24.0027	24.0026	24.0028	24.0024	24.6867	385049	18.4028	0.38474	18.1713	23.82	23.8433
08/04 05:25:00	23.9	27.682	23.3361	23.7185	23.7975	24	24.6757	24.7169	23.9713	23.8003	23.9491	23.8233	24.0024	23.8793	24.0024	23.9004	24.0027	24.0026	24.0027	24.0024	24.6766	381768	18.4536	0.385033	18.1854	23.8156	23.8473
08/04 05:30:00	23.9	30.2293	23.3382	23.7215	23.8004	24	24.6777	24.7182	23.9811	23.808	23.9579	23.8321	24.0024	23.8866	24.0023	23.9085	24.0026	24.0025	24.0027	24.0024	24.6676	378264	18.5046	0.385019	18.2072	23.8111	23.8502
08/04 05:35:00	23.9	35.8217	23.3392	23.7236	23.8025	24	24.6795	24.7191	23.9928	23.8214	23.9698	23.8431	24.0024	23.8996	24.0023	23.9189	24.0026	24.0025	24.0026	24.0024	24.6591	374714	18.6164	0.384678	18.2368	23.8065	23.853
08/04 05:40:00	23.9	41.409	23.3394	23.725	23.804	24	24.6811	24.7198	24.0019	23.8402	23.985	23.8564	24.0023	23.9183	24.0023	23.9318	24.0025	24.0024	24.0025	24.0023	24.6511	417512	18.7282	0.384004	18.2791	23.8019	23.8558
08/04 05:45:00	23.9	46.9913	23.339	23.726	23.8051	24	24.6826	24.7204	24.0021	23.8621	24.0017	23.8714	24.0023	23.9401	24.0023	23.9464	24.0024	24.0024	24.0025	24.0023	24.6436	463303	18.8398	0.386857	18.3342	23.7973	23.8587
08/04 05:50:00	23.9	52.5684	23.3382	23.7267	23.806	24	24.6838	24.7211	24.0021	23.8859	24.0021	23.8876	24.0023	23.964	24.0023	23.9623	24.0024	24.0024	24.0024	24.0022	24.6366	474430	18.9514	0.393487	18.4021	23.7927	23.8616
08/04 05:55:00	23.9	58.1404	23.3372	23.7273	23.8068	24	24.6849	24.7218	24.0021	23.9112	24.0021	23.9049	24.0023	23.9893	24.0023	23.9794	24.0024	24.0024	24.0024	24.0022	24.63	471422	19.0628	0.401003	18.4828	23.7922	23.8646
08/04 06:00:00	23.9	63.7073	23.336	23.7278	23.8075	24	24.686	24.7225	24.0021	23.9376	24.0021	23.9233	24.0022	24.0017	24.0022	23.9975	24.0023	24.0024	24.0024	24.0022	24.6238	462694	19.1741	0.408227	18.5554	23.7922	23.8668
08/04 06:05:00	23.85	69.2689	23.3347	23.7283	23.8081	24	24.6868	24.7227	24.0021	23.9639	24.0021	23.9414	24.0022	24.0021	24.0022	24.0019	24.0023	24.0023	24.0023	24.0022	24.6148	462478	19.2354	0.414682	18.6365	23.8158	23.8675
08/04 06:10:00	23.8	74.8255	23.3333	23.7291	23.8092	24	24.6874	24.7224	24.0021	23.9903	24.0021	23.9601	24.0022	24.0021	24.0022	24.002	24.0022	24.0023	24.0022	24.0021	24.6046	467267	19.2965	0.420821	18.7186	23.8292	23.8683
08/04 06:15:00	23.75	80.3768	23.3318	23.7297	23.8101	24	24.6879	24.7219	24.0021	24.0016	24.0021	23.979	24.0021	24.0021	24.0022	24.002	24.0022	24.0022	24.0022	24.0021	24.5938	473688	19.3575	0.427241	18.8015	23.8377	23.8689
08/04 06:20:00	23.7	85.923	23.3302	23.7302	23.8109	24	24.688	24.7212	24.0021	24.002	24.0021	23.9985	24.0021	24.0021	24.0021	24.002	24.0021	24.0022	24.0022	24.0021	24.5829	475265	19.4185	0.434382	18.8853	23.8433	23.8694
08/04 06:25:00	23.65	91.4641	23.3287	23.7306	23.8116	24	24.6879	24.7204	24.0021	24.002	24.0021	24.0018	24.0021	24.0021	24.0021	24.002	24.0021	24.0022	24.0021	24.002	24.5719	477201	19.4793	0.4419	18.9699	23.8473	23.87
08/04 06:30:00	23.6	97	23.3271	23.731	23.8123	24	24.6874	24.7195	24.0021	24.002	24.0021	24.0019	24.0021	24.0021	24.0021	24.002	24.0021	24.0022	24.0021	24.002	24.561	479336	19.54	0.449853	19.0554	23.8502	23.8704
08/04 06:35:00	23.55	96.4909	23.3255	23.7315	23.8131	24	24.687	24.7188	24.002	24.002	24.002	24.0019	24.0021	24.0021	24.0021	24.002	24.0021	24.0021	24.0021	24.002	24.5504	481583	19.4798	0.458276	19.1417	23.853	23.871
08/04 06:40:00	23.5	95.997	23.3238	23.7318	23.8138	24	24.6865	24.7181	24.002	24.002	24.002	24.0019	24.0021	24.002	24.0021	24.002	24.002	24.0021	24.002	24.002	24.5399	483896	19.4199	0.467182	19.2136	23.8558	23.8714
08/04 06:45:00	23.45	95.5182	23.3222	23.7321	23.8144	24	24.6858	24.7174	24.002	24.002	24.002	24.0019	24.002	24.002	24.002	24.002	24.002	24.002	24.002	24.002	24.5293	486248	19.3604	0.472714	19.2713	23.8587	23.8719
08/04 06:50:00	23.4	95.0545	23.3206	23.7323	23.8149	24	24.6849	24.7165	24.002	24.002	24.002	24.0019	24.002	24.002	24.002	24.002	24.002	24.002	24.002	24.002	24.5187	488620	19.3011	0.474626	19.3146	23.8616	23.8722
08/04 06:55:00	23.35	94.6057	23.3189	23.7323	23.8154	24	24.6839	24.7155	24.002	24.0019	24.002	24.0019	24.002	24.002	24.002	24.002	24.002	24.002	24.002	24.002	24.508	489990	19.2421	0.475808	19.3438	23.8646	23.8725
08/04 07:00:00	23.3	94.1717	23.3173	23.7322	23.8156	24	24.6828	24.7144	24.002	24.0019	24.002	24.0019	24.002	24.002	24.002	24.002	24.002	24.002	24.002	24.0019	24.4973	492305	19.1834	0.477356	19.3587	23.8668	23.8727
08/04 07:05:00	23.3917	93.7524	23.3791	23.8045	23.8883	24	24.6847	24.7168	24.0023	24.0022	24.0023	24.0022	24.0023	24.0022	24.0023	24.0022	24.0022	24.0022	24.0022	24.0022	24.555	495595	19.2667	0.479823	19.3595	23.8675	23.9232
08/04 07:10:00	23.4833	93.3475	23.4233	23.857	23.9407	24	24.6904	24.7231	24.0022	24.0021	24.0022	24.0021	24.0022	24.0021	24.0022	24.0021	24.0021	24.002	24.0021	24.002	24.5864	499567	19.3503	0.482583	19.3621	23.8683	23.9595
08/04 07:15:00	23.575	92.9569	23.4536	23.8931	23.9763	24	24.6979	24.7312	24.0021	24.002	24.0021	24.002	24.0021	24.002	24.0021	24.002	24.0019	24.0019	24.0019	24.0019	24.6059	503944	19.4341	0.485275	19.3666	23.8689	23.9842
08/04 07:20:00	23.6667	92.5804	23.4748	23.919	23.9996	24	24.7056	24.739	24.002	24.0019	24.002	24.0019	24.002	24.0019	24.002	24.0019	24.0018	24.0018	24.0018	24.0018	24.6193	508630	19.5183	0.487796	19.373	23.8694	24.0003
08/04 07:25:00	23.7583	92.2178	23.4899	23.9385	24	24	24.7126	24.7441	24.0019	24.0018	24.0019	24.0018	24.0019	24.0018	24.0019	24.0018	24.0017	24.0017	24.0017	24.0017	24.6292	513604	19.6027	0.490576	19.3813	23.87	24.0006
08/04 07:30:00	23.85	91.8688	23.5008	23.9537	24	24	24.7186	24.7476	24.0018	24.0018	24.0019	24.0018	24.0018	24.0017	24.0018	24.0017	24.0016	24.0016	24.0017	24.0016	24.637	518703	19.6874	0.49361	19.3916	23.8704	24.0005
08/04 07:35:00	23.9417	102.624	23.5089	23.966	24	24	24.7234	24.7498	24.0018	24.0017	24.0018	24.0017	24.0017	24.0017	24.0017	24.0017	24.0016	24.0016	24.0016	24.0016	24.6434	523935	19.9942	0.49689	19.4039	23.871	24.0005
08/04 07:40:00	24.0333	113.365	23.5152	23.9763	24	24	24.7273	24.751	24.0017	24.0017	24.0018	24.0017	24.0017	24.0016	24.0017	24.0016	24.0015	24.0015	24.0015	24.0015	24.649	529282	20.3006	0.50042	19.4467	23.8714	24.0005
08/04 07:45:00	24.125	124.091	23.52	23.9852	24	24	24.7305	24.7516	24.0017	24.0016	24.0017	24.0016	24.0016	24.0016	24.0016	24.0016	24.0015	24.0015	24.0015	24.0015	24.6544	534723	20.6068	0.504202	19.5201	23.8719	24.0005
08/04 07:50:00	24.2167	134.802	23.5239	23.9931	24	24	24.7332	24.752	24.0017	24.0016	24.0017	24.0016	24.0016	24.0015	24.0016	24.0015	24.0015	24.0014	24.0015	24.0014	24.6597	540247	20.9127	0.508242	19.624	23.8722	24.0005
08/04 07:55:00	24.3083	145.5	23.5271	23.9999	24	24	24.7356	24.7522	24.0016	24.0016	24.0017	24.0016	24.0015	24.0015	24.0016	24.0015	24.0014	24.0014	24.0014	24.0014	24.6651	545846	21.2183	0.512544	19.7583	23.8725	24.0005
08/04 08:00:00	24.4	156.183	23.5298	24	24	24	24.7372	24.7524	24.0016	24.0015	24.0017	24.0015	24.0015	24.0015	24.0015	24.0015	24.0014	24.0014	24.0014	24.0014	24.6706	551519	21.5237	0.517198	19.923	23.8727	24.0005
08/04 08:05:00	24.5417	166.852	23.5567	24	24	24	24.7324	24.7466	24.0016	24.0016	24.0017	24.0016	24.0015	24.0015	24.0016	24.0015	24.0014	24.0014	24.0014	24.0014	24.6719	556615	21.8787	0.522133	20.118	23.9232	24.0005
08/04 08:10:00	24.6833	177.508	23.575	24	24	24	24.7298	24.7434	24.0016	24.0016	24.0017	24.0015	24.0015	24.0015	24.0015	24.0015	24.0014	24.0014	24.0014	24.0014	24.6761	559488	22.2335	0.527218	20.3356	23.9595	24.0005
08/04 08:15:00	24.825	188.15	23.5878	24	24.0001	24.0001	24.7285	24.7418	24.0016	24.0016	24.0017	24.0015	24.0015	24.0015	24.0015	24.0015	24.0014	24.0014	24.0014	24.0014	24.6821	562011	22.588	0.532211	20.5759	23.9842	24.0005
08/04 08:20:00	24.9667	198.779	23.597	24.0001	24.0001	24.0001	24.7281	24.741	24.0016	24.0016	24.0017	24.0015	24.0015	24.0015	24.0015	24.0015	24.0014	24.0014	24.0014	24.0014	24.689	564632	22.9423	0.53705	20.8387	24.0003	24.0005
08/04 08:25:00	25.1083	209.396	23.6038	24.0001	24.0001	24.0001	24.7281	24.7407	24.0016	24.0016	24.0017	24.0016	24.0015	24.0015	24.0015	24.0015	24.0015	24.0014	24.0015	24.0014	24.6965	567238	23.2963	0.541717	21.1241	24.0006	24.0005
08/04 08:30:00	25.25	220	23.6089	24.0001	24.0001	24.0002	24.7284	24.7407	24.0016	24.0016	24.0017	24.0016	24.0015	24.0015	24.0015	24.0015	24.0015	24.0015	24.0015	24.0015	24.7043	569802	23.65	0.546187	21.4319	24.0005	24.0006
08/04 08:35:00	25.3917	226.829	23.6129	24.0001	24.0001	24.0002	24.7288	24.7409	24.0016	24.0016	24.0017	24.0016	24.0015	24.0015	24.0015	24.0015	24.0015	24.0015	24.0015	24.0015	24.7124	572336	23.9282	0.550445	21.7621	24.0005	24.0006
08/04 08:40:00	25.5333	233.664	23.6161	24.0001	24.0002	24.0002	24.7294	24.7412	24.0016	24.0016	24.0016	24.0015	24.0015	24.0015	24.0015	24.0015	24.0015	24.0015	24.0015	24.0015	24.7207	574859	24.2066	0.554478	22.0899	24.0005	24.0006
08/04 08:45:00	25.675	240.505	23.6188	24.0002	24.0002	24.0002	24.73	24.7416	24.0016	24.0016	24.0016	24.0015	24.0015	24.0015	24.0015	24.0015	24.0015	24.0015	24.0015	24.0015	24.7291	577378	24.4851	0.558276	22.4154	24.0005	24.0006
08/04 08:50:00	25.8167	247.351	23.6212	24.0002	24.0002	24.0003	24.7305	24.7419	24.0016	24.0016	24.0016	24.0015	24.0015	24.0015	24.0015	24.0015	24.0015	24.0015	24.0015	24.0015	24.7376	579900	24.7637	0.561831	22.7386	24.0005	24.0006
08/04 08:55:00	25.9583	254.203	23.6232	24.0002	24.0002	24.0003	24.731	24.7421	24.0016	24.0015	24.0016	24.0015	24.0015	24.0015	24.0015	24.0015	24.0015	24.0015	24.0015	24.0015	24.7462	582452	25.0424	0.565135	23.0595	24.0005	24.0006
08/04 09:00:00	26.1	261.06	23.6251	24.0002	24.0003	24.0003	24.7315	24.7424	24.0016	24.0015	24.0016	24.0015	24.0015	24.0015	24.0015	24.0015	24.0015	24.0015	24.0015	24.0015	24.7548	585014	25.3212	0.568186	23.3782	24.0005	24.0006
08/04 09:05:00	26.1917	267.922	23.6269	24.0002	24.0003	24.0003	24.7319	24.7425	24.0016	24.0015	24.0016	24.0015	24.0015	24.0015	24.0015	24.0015	24.0015	24.0015	24.0015	24.0015	24.7628	586851	25.5501	0.570977	23.6947	24.0005	24.0007
08/04 09:10:00	26.2833	274.789	23.6285	24.0003	24.0003	24.0004	24.7323	24.7427	24.0016	24.0015	24.0016	24.0015	24.0015	24.0015	24.0015	24.0015	24.0015	24.0015	24.0015	24.0015	24.7706	587903	25.7791	0.573497	24.0006	24.0005	24.0007
08/04 09:15:00	26.375	281.661	23.6301	24.0003	24.0003	24.0004	24.7327	24.7429	24.0016	24.0015	24.0016	24.0015	24.0015	24.0015	24.0015	24.0015	24.0015	24.0015	24.0015	24.0015	24.7784	588508	26.0082	0.575865	24.2961	24.0005	24.0007
08/04 09:20:00	26.4667	288.537	23.6316	24.0003	24.0003	24.0004	24.733	24.743	24.0015	24.0015	24.0016	24.0015	24.0015	24.0015	24.0015	24.0015	24.0015	24.0015	24.0015	24.0015	24.7862	588814	26.2374	0.578073	24.5811	24.0005	24.0007
08/04 09:25:00	26.5583	295.417	23.6331	24.0003	24.0004	24.0004	24.7333	24.7431	24.0015	24.0015	24.0016	24.0015	24.0015	24.0015	24.0015	24.0015	24.0015	24.0015	24.0015	24.0015	24.7941	588925	26.4667	0.580088	24.8557	24.0005	24.0007
08/04 09:30:00	26.65	302.302	23.6346	24.0003	24.0004	24.0004	24.7337	24.7432	24.0015	24.0015	24.0015	24.0015	24.0015	24.0015	24.0015	24.0015	24.0015	24.0015	24.0015	24.0015	24.8022	588907	26.696	0.581895	25.1199	24.0006	24.0007
08/04 09:35:00	26.7417	306.931	23.636	24.0003	24.0004	24.0005	24.7341	24.7434	24.0015	24.0015	24.0015	24.0015	24.0015	24.0015	24.0015	24.0015	24.0015	24.0015	24.0015	24.0015	24.8105	588794	26.8803	0.583487	25.3737	24.0006	24.0007
08/04 09:40:00	26.8333	311.558	23.6374	24.0004	24.0004	24.0005	24.7345	24.7436	24.0015	24.0015	24.0015	24.0015	24.0015	24.0015	24.0015	24.0015	24.0015	24.0015	24.0015	24.0015	24.8192	588616	27.0645	0.584859	25.6197	24.0006	24.0008
08/04 09:45:00	26.925	316.183	23.6388	24.0004	24.0004	24.0005	24.7349	24.7439	24.0015	24.0015	24.0015	24.0015	24.0015	24.0015	24.0015	24.0015	24.0015	24.0015	24.0015	24.0015	24.828	588387	27.2487	0.586005	25.8579	24.0006	24.0008
08/04 09:50:00	27.0167	320.806	23.6402	24.0004	24.0005	24.0005	24.7353	24.7441	24.0015	24.0015	24.0015	24.0015	24.0015	24.0015	24.0015	24.0015	24.0015	24.0015	24.0015	24.0015	24.8371	588113	27.4328	0.586923	26.0882	24.0006	24.0008
08/04 09:55:00	27.1083	325.426	23.6416	24.0004	24.0005	24.0005	24.7357	24.7443	24.0015	24.0015	24.0015	24.0015	24.0015	24.0015	24.0015	24.0015	24.0015	24.0015	24.0015	24.0015	24.8464	587801	27.6169	0.587607	26.3106	24.0006	24.0008
08/04 10:00:00	27.2	330.045	23.6429	24.0004	24.0005	24.0005	24.7361	24.7444	24.0015	24.0015	24.0015	24.0015	24.0015	24.0015	24.0015	24.0015	24.0015	24.0015	24.0015	24.0015	24.8559	587454	27.8009	0.588053	26.5252	24.0006	24.0008
08/04 10:05:00	27.3833	334.662	23.6076	24.0004	24.0004	24.0005	24.7451	24.7532	24.0014	24.0014	24.0014	24.0014	24.0014	24.0013	24.0014	24.0014	24.0014	24.0013	24.0014	24.0014	24.8768	587267	28.0766	0.588256	26.7318	24.0007	24.0007
08/04 10:10:00	27.5667	339.276	23.5844	24.0004	24.0004	24.0005	24.7501	24.7578	24.0013	24.0013	24.0013	24.0013	24.0013	24.0013	24.0013	24.0013	24.0013	24.0013	24.0013	24.0013	24.8936	588641	28.3522	0.588291	26.9423	24.0007	24.0007
08/04 10:15:00	27.75	343.889	23.5693	24.0004	24.0004	24.0004	24.7529	24.76	24.0013	24.0012	24.0013	24.0013	24.0013	24.0012	24.0013	24.0013	24.0012	24.0012	24.0012	24.0013	24.9085	590457	28.6278	0.588352	27.1568	24.0007	24.0007
08/04 10:20:00	27.9333	348.5	23.5595	24.0003	24.0004	24.0004	24.7545	24.7612	24.0012	24.0012	24.0012	24.0012	24.0012	24.0012	24.0012	24.0012	24.0012	24.0012	24.0012	24.0012	24.9227	592613	28.9033	0.588515	27.3751	24.0007	24.0006
08/04 10:25:00	28.1167	353.109	23.5533	24.0003	24.0004	24.0004	24.7555	24.7619	24.0012	24.0011	24.0012	24.0012	24.0012	24.0011	24.0012	24.0012	24.0011	24.0011	24.0012	24.0012	24.9367	595022	29.1788	0.588831	27.5972	24.0007	24.0006
08/04 10:30:00	28.3	357.716	23.5493	24.0003	24.0004	24.0004	24.7563	24.7624	24.0011	24.0011	24.0012	24.0011	24.0011	24.0011	24.0011	24.0011	24.0011	24.0011	24.0011	24.0011	24.9508	597598	29.4543	0.589339	27.8232	24.0007	24.0006
08/04 10:35:00	28.4833	362.489	23.5469	24.0003	24.0004	24.0004	24.7569	24.7628	24.0011	24.0011	24.0011	24.0011	24.0011	24.0011	24.0011	24.0011	24.0011	24.0011	24.0011	24.0011	24.9651	600276	29.7331	0.590064	28.0531	24.0007	24.0006
08/04 10:40:00	28.6667	367.26	23.5455	24.0003	24.0004	24.0004	24.7575	24.7631	24.0011	24.0011	24.0011	24.0011	24.0011	24.001	24.0011	24.0011	24.0011	24.001	24.0011	24.0011	24.9796	603013	30.0119	0.59102	28.2908	24.0008	24.0006
08/04 10:45:00	28.85	372.03	23.5448	24.0003	24.0004	24.0004	24.7603	24.7657	24.0009	24.001	24.0011	24.0011	24.0009	24.001	24.001	24.001	24.0009	24.001	24.001	24.001	24.9975	605473	30.2906	0.59222	28.5364	24.0008	24.0006
08/04 10:50:00	29.0333	376.798	23.5445	24.0003	24.0004	24.0004	24.7621	24.7672	24.0008	24.001	24.001	24.001	24.0008	24.001	24.001	24.001	24.0008	24.001	24.001	24.001	25.0146	607981	30.5693	0.593644	28.7899	24.0008	24.0005
08/04 10:55:00	29.2167	381.565	23.5446	24.0003	24.0004	24.0004	24.7623	24.7672	24.0008	24.001	24.001	24.001	24.0008	24.001	24.001	24.001	24.0008	24.001	24.001	24.001	25.0301	610535	30.848	0.5953	29.0513	24.0008	24.0005
08/04 11:00:00	29.4	386.331	23.5449	24.0003	24.0003	24.0004	24.7637	24.7684	24.0008	24.0009	24.001	24.001	24.0008	24.0008	24.001	24.001	24.0008	24.0008	24.001	24.001	25.0474	612872	31.1266	0.597194	29.3206	24.0008	24.0005
08/04 11:05:00	29.45	391.095	23.5454	24.0003	24.0003	24.0004	24.764	24.7686	24.0008	24.0008	24.001	24.001	24.0008	24.0008	24.001	24.001	24.0008	24.0008	24.001	24.001	25.0621	614337	31.2719	0.599312	29.5977	24.0007	24.0005
08/04 11:10:00	29.5	395.859	23.546	24.0003	24.0003	24.0003	24.7635	24.7678	24.0008	24.0008	24.001	24.001	24.0008	24.0008	24.001	24.001	24.0008	24.0008	24.001	24.001	25.0747	614902	31.4172	0.601568	29.864	24.0007	24.0005
08/04 11:15:00	29.55	400.622	23.5467	24.0003	24.0003	24.0003	24.7628	24.7669	24.0008	24.0008	24.001	24.001	24.0008	24.0008	24.001	24.001	24.0008	24.0008	24.001	24.001	25.0868	614988	31.5624	0.603756	30.1194	24.0007	24.0005
08/04 11:20:00	29.6	405.383	23.5474	24.0003	24.0003	24.0003	24.7622	24.7662	24.0008	24.0008	24.001	24.001	24.0008	24.0008	24.001	24.001	24.0008	24.0008	24.001	24.001	25.0988	614787	31.7077	0.605801	30.364	24.0006	24.0005
08/04 11:25:00	29.65	410.144	23.5482	24.0003	24.0003	24.0003	24.7618	24.7658	24.0008	24.0008	24.001	24.001	24.0008	24.0008	24.001	24.001	24.0008	24.0008	24.001	24.001	25.111	614418	31.8529	0.607649	30.5977	24.0006	24.0005
08/04 11:30:00	29.7	414.904	23.549	24.0003	24.0003	24.0003	24.7616	24.7655	24.0008	24.0008	24.001	24.001	24.0008	24.0008	24.0009	24.001	24.0009	24.0008	24.0009	24.001	25.1234	613952	31.9981	0.609265	30.8205	24.0006	24.0005
08/04 11:35:00	29.75	450.963	23.5498	24.0003	24.0003	24.0003	24.7618	24.7656	24.0009	24.0008	24.0009	24.001	24.0009	24.0008	24.0009	24.0009	24.0009	24.0008	24.0009	24.0009	25.1364	613402	32.7693	0.610628	31.0325	24.0006	24.0005
08/04 11:40:00	29.8	487.156	23.5506	24.0003	24.0003	24.0003	24.7606	24.7643	24.0009	24.001	24.0009	24.0009	24.0009	24.001	24.0009	24.0009	24.0009	24.001	24.0009	24.0009	25.1472	612992	33.5431	0.611722	31.2855	24.0006	24.0005
08/04 11:45:00	29.85	523.433	23.5515	24.0003	24.0003	24.0003	24.7598	24.7635	24.0009	24.001	24.0009	24.0009	24.0009	24.001	24.0009	24.0009	24.0009	24.001	24.0009	24.0009	25.1585	612570	34.3187	0.612553	31.5798	24.0006	24.0005
08/04 11:50:00	29.9	559.745	23.5523	24.0003	24.0003	24.0003	24.76	24.7637	24.0009	24.001	24.0009	24.0009	24.0009	24.001	24.0009	24.0009	24.0009	24.001	24.0009	24.0009	25.1712	612105	35.0949	0.613145	31.9154	24.0005	24.0005
08/04 11:55:00	29.95	596.042	23.5532	24.0003	24.0003	24.0003	24.7609	24.7645	24.0009	24.001	24.0009	24.0009	24.0009	24.001	24.0009	24.0009	24.0009	24.001	24.0009	24.0009	25.1851	611584	35.8708	0.613488	32.2926	24.0005	24.0005
08/04 12:00:00	30	632.273	23.554	24.0003	24.0003	24.0003	24.7617	24.7652	24.001	24.001	24.0009	24.0009	24.0009	24.001	24.0009	24.0009	24.001	24.001	24.0009	24.0009	25.1989	611066	36.6455	0.613576	32.7111	24.0005	24.0005
08/04 12:05:00	30.05	668.39	23.5915	24.0003	24.0003	24.0003	24.7532	24.7567	24.001	24.0011	24.001	24.001	24.001	24.001	24.0009	24.001	24.001	24.001	24.001	24.001	25.1988	612119	37.4178	0.613425	33.171	24.0005	24.0005
08/04 12:10:00	30.1	704.343	23.6166	24.0003	24.0004	24.0004	24.7504	24.7542	24.0011	24.0011	24.001	24.0009	24.0011	24.0011	24.001	24.0009	24.0011	24.0011	24.001	24.0009	25.2089	612914	38.1869	0.61324	33.6832	24.0005	24.0005
08/04 12:15:00	30.15	740.082	23.6337	24.0004	24.0004	24.0004	24.749	24.753	24.0011	24.0011	24.001	24.0009	24.0011	24.0011	24.001	24.0009	24.0011	24.0011	24.001	24.0009	25.2212	614083	38.9516	0.613075	34.2473	24.0005	24.0006
08/04 12:20:00	30.2	775.558	23.6456	24.0004	24.0004	24.0004	24.7477	24.7518	24.0012	24.0011	24.0011	24.0009	24.0011	24.0011	24.0011	24.001	24.0012	24.0011	24.0011	24.001	25.2335	615496	39.7112	0.612999	34.8631	24.0005	24.0006
08/04 12:25:00	30.25	810.722	23.6542	24.0004	24.0004	24.0004	24.7467	24.7508	24.0012	24.0012	24.0011	24.001	24.0012	24.0012	24.0011	24.001	24.0012	24.0012	24.0011	24.001	25.2461	617015	40.4644	0.613059	35.5301	24.0005	24.0006
08/04 12:30:00	30.3	845.524	23.6605	24.0004	24.0004	24.0004	24.746	24.7502	24.0012	24.0012	24.0011	24.001	24.0012	24.0012	24.0011	24.0011	24.0012	24.0012	24.0011	24.0011	25.259	618607	41.2105	0.613275	36.2477	24.0005	24.0006
08/04 12:35:00	30.35	839.563	23.6653	24.0004	24.0004	24.0004	24.7461	24.7502	24.0012	24.0012	24.0011	24.0011	24.0012	24.0012	24.0011	24.0011	24.0012	24.0012	24.0012	24.0011	25.273	620196	41.1413	0.613663	37.0154	24.0005	24.0006
08/04 12:40:00	30.4	833.4	23.6691	24.0004	24.0004	24.0005	24.7465	24.7507	24.0012	24.0012	24.0011	24.0011	24.0012	24.0012	24.0012	24.0011	24.0012	24.0012	24.0012	24.0012	25.2879	621784	41.068	0.614229	37.7131	24.0005	24.0007
08/04 12:45:00	30.45	827.037	23.6721	24.0004	24.0004	24.0005	24.7473	24.7514	24.0012	24.0012	24.0012	24.0011	24.0012	24.0012	24.0012	24.0012	24.0012	24.0012	24.0012	24.0012	25.3036	623340	40.9907	0.614962	38.3401	24.0005	24.0007
08/04 12:50:00	30.5	820.472	23.6747	24.0004	24.0004	24.0005	24.748	24.752	24.0012	24.0012	24.0012	24.0012	24.0012	24.0012	24.0012	24.0012	24.0012	24.0012	24.0012	24.0012	25.3197	624900	40.9094	0.615859	38.8961	24.0005	24.0007
08/04 12:55:00	30.55	813.706	23.677	24.0004	24.0005	24.0005	24.7486	24.7525	24.0012	24.0012	24.0012	24.0012	24.0012	24.0012	24.0012	24.0012	24.0012	24.0012	24.0012	24.0012	25.3359	626462	40.8241	0.616925	39.3807	24.0005	24.0007
08/04 13:00:00	30.6	806.74	23.679	24.0005	24.0005	24.0005	24.7491	24.7529	24.0012	24.0012	24.0012	24.0012	24.0012	24.0012	24.0012	24.0012	24.0012	24.0012	24.0012	24.0013	25.3527	628023	40.7348	0.618165	39.7935	24.0005	24.0007
08/04 13:05:00	30.6	799.573	23.6256	24.0004	24.0004	24.0004	24.7568	24.7605	24.0012	24.0011	24.0011	24.0012	24.0012	24.0012	24.0011	24.0012	24.0012	24.0012	24.0011	24.0012	25.3826	628138	40.5915	0.619578	40.1342	24.0005	24.0006
08/04 13:10:00	30.6	792.207	23.587	24.0004	24.0004	24.0004	24.7605	24.7638	24.0012	24.0012	24.0011	24.0012	24.0012	24.0012	24.0011	24.0012	24.0012	24.0012	24.0011	24.0012	25.4058	628347	40.4441	0.620913	40.3987	24.0005	24.0006
08/04 13:15:00	30.6	784.641	23.5606	24.0004	24.0004	24.0005	24.7615	24.7644	24.0012	24.0012	24.0011	24.0012	24.0012	24.0012	24.0011	24.0012	24.0012	24.0012	24.0012	24.0012	25.4251	628429	40.2928	0.622199	40.5868	24.0006	24.0007
08/04 13:20:00	30.6	776.876	23.5423	24.0004	24.0004	24.0005	24.7614	24.7641	24.0012	24.0012	24.0012	24.0012	24.0012	24.0012	24.0012	24.0012	24.0012	24.0012	24.0012	24.0013	25.4437	628423	40.1375	0.623395	40.6986	24.0006	24.0007
08/04 13:25:00	30.6	768.912	23.5295	24.0004	24.0004	24.0005	24.7611	24.7636	24.0012	24.0012	24.0012	24.0013	24.0012	24.0012	24.0012	24.0013	24.0012	24.0012	24.0012	24.0013	25.4624	628389	39.9782	0.624472	40.7341	24.0006	24.0007
08/04 13:30:00	30.6	760.752	23.5204	24.0004	24.0004	24.0005	24.7608	24.7631	24.0012	24.0012	24.0012	24.0013	24.0012	24.0012	24.0012	24.0013	24.0012	24.0012	24.0012	24.0013	25.4821	628350	39.815	0.62542	40.6936	24.0006	24.0007
08/04 13:35:00	30.6	738.563	23.5137	24.0004	24.0004	24.0005	24.7607	24.763	24.0012	24.0012	24.0012	24.0013	24.0012	24.0012	24.0012	24.0013	24.0012	24.0012	24.0012	24.0013	25.5028	628296	39.3713	0.626232	40.5773	24.0006	24.0007
08/04 13:40:00	30.6	716.448	23.5087	24.0004	24.0004	24.0005	24.7609	24.7631	24.0012	24.0012	24.0012	24.0013	24.0012	24.0012	24.0012	24.0013	24.0012	24.0012	24.0012	24.0013	25.5249	628235	38.929	0.626907	40.4298	24.0007	24.0007
08/04 13:45:00	30.6	694.428	23.5049	24.0004	24.0005	24.0005	24.7611	24.7633	24.0012	24.0012	24.0012	24.0013	24.0012	24.0012	24.0012	24.0013	24.0012	24.0012	24.0012	24.0013	25.548	628170	38.4886	0.627444	40.2515	24.0007	24.0007
08/04 13:50:00	30.6	672.521	23.5019	24.0004	24.0005	24.0005	24.7614	24.7635	24.0012	24.0012	24.0012	24.0013	24.0012	24.0012	24.0012	24.0013	24.0012	24.0012	24.0012	24.0013	25.5723	628100	38.0504	0.627847	40.043	24.0007	24.0007
08/04 13:55:00	30.6	650.748	23.4995	24.0004	24.0005	24.0005	24.7617	24.7638	24.0012	24.0012	24.0012	24.0013	24.0012	24.0012	24.0012	24.0013	24.0012	24.0012	24.0012	24.0013	25.5975	628024	37.615	0.628114	39.8048	24.0007	24.0007
08/04 14:00:00	30.6	629.128	23.4974	24.0004	24.0005	24.0005	24.7621	24.7642	24.0012	24.0012	24.0012	24.0013	24.0012	24.0012	24.0012	24.0013	24.0012	24.0012	24.0012	24.0013	25.6239	627943	37.1826	0.628244	39.5373	24.0007	24.0007
08/04 14:05:00	30.6417	607.68	23.4957	24.0004	24.0005	24.0005	24.7626	24.7646	24.0012	24.0012	24.0012	24.0013	24.0012	24.0012	24.0012	24.0013	24.0012	24.0012	24.0012	24.0013	25.6517	628219	36.7953	0.628237	39.2413	24.0006	24.0007
08/04 14:10:00	30.6833	586.423	23.4942	24.0005	24.0005	24.0005	24.7631	24.7651	24.0012	24.0012	24.0012	24.0013	24.0012	24.0012	24.0012	24.0013	24.0012	24.0012	24.0012	24.0013	25.6807	628867	36.4118	0.628244	38.925	24.0006	24.0007
08/04 14:15:00	30.725	565.377	23.4929	24.0005	24.0005	24.0005	24.7636	24.7656	24.0012	24.0012	24.0012	24.0013	24.0012	24.0012	24.0012	24.0013	24.0012	24.0012	24.0012	24.0013	25.7106	629708	36.0325	0.628287	38.5889	24.0007	24.0007
08/04 14:20:00	30.7667	544.558	23.4917	24.0005	24.0005	24.0005	24.7642	24.7661	24.0012	24.0012	24.0012	24.0013	24.0012	24.0012	24.0012	24.0013	24.0012	24.0012	24.0012	24.0013	25.7413	630667	35.6578	0.628394	38.2339	24.0007	24.0007
08/04 14:25:00	30.8083	523.987	23.4907	24.0005	24.0005	24.0005	24.7647	24.7666	24.0012	24.0012	24.0012	24.0013	24.0012	24.0012	24.0012	24.0013	24.0012	24.0012	24.0012	24.0013	25.7726	631695	35.2881	0.628581	37.8606	24.0007	24.0007
08/04 14:30:00	30.85	503.68	23.4897	24.0005	24.0005	24.0005	24.7653	24.7671	24.0012	24.0012	24.0012	24.0013	24.0012	24.0012	24.0012	24.0013	24.0012	24.0012	24.0012	24.0013	25.8045	632766	34.9236	0.628856	37.4698	24.0007	24.0007
08/04 14:35:00	30.8917	508.229	23.4888	24.0005	24.0005	24.0005	24.7655	24.7673	24.0012	24.0012	24.0012	24.0013	24.0012	24.0012	24.0012	24.0013	24.0012	24.0013	24.0012	24.0013	25.8359	633903	35.0562	0.629224	37.0622	24.0007	24.0007
08/04 14:40:00	30.9333	512.403	23.488	24.0005	24.0005	24.0005	24.7657	24.7674	24.0012	24.0012	24.0012	24.0013	24.0012	24.0012	24.0012	24.0013	24.0012	24.0013	24.0012	24.0013	25.867	635085	35.1814	0.629691	36.7026	24.0007	24.0007
08/04 14:45:00	30.975	516.195	23.4872	24.0005	24.0005	24.0005	24.7658	24.7675	24.0012	24.0013	24.0012	24.0013	24.0012	24.0012	24.0012	24.0013	24.0012	24.0013	24.0012	24.0013	25.898	636300	35.2989	0.630262	36.3903	24.0007	24.0007
08/04 14:50:00	31.0167	519.594	23.4864	24.0005	24.0005	24.0006	24.766	24.7677	24.0012	24.0013	24.0012	24.0013	24.0012	24.0013	24.0012	24.0013	24.0012	24.0013	24.0013	24.0013	25.9289	637545	35.4085	0.63094	36.1245	24.0007	24.0007
08/04 14:55:00	31.0583	522.592	23.4857	24.0005	24.0005	24.0006	24.7663	24.768	24.0012	24.0013	24.0012	24.0013	24.0012	24.0013	24.0012	24.0013	24.0012	24.0013	24.0013	24.0013	25.9595	638811	35.5102	0.631727	35.9043	24.0007	24.0007
08/04 15:00:00	31.1	525.182	23.485	24.0005	24.0005	24.0006	24.7667	24.7684	24.0012	24.0013	24.0012	24.0014	24.0012	24.0013	24.0012	24.0013	24.0013	24.0013	24.0013	24.0014	25.9898	640094	35.6036	0.632626	35.7289	24.0007	24.0007
08/04 15:05:00	31.1	527.354	23.4721	24.0005	24.0005	24.0005	24.7702	24.7718	24.0012	24.0013	24.0012	24.0014	24.0012	24.0012	24.0012	24.0013	24.0012	24.0013	24.0012	24.0013	26.0265	640679	35.6471	0.633638	35.5973	24.0007	24.0007
08/04 15:10:00	31.1	529.103	23.4635	24.0005	24.0005	24.0005	24.7724	24.7738	24.0012	24.0013	24.0012	24.0013	24.0012	24.0012	24.0012	24.0013	24.0012	24.0013	24.0012	24.0013	26.0581	641078	35.6821	0.634677	35.5017	24.0007	24.0007
08/04 15:15:00	31.1	530.421	23.4577	24.0005	24.0005	24.0005	24.7737	24.775	24.0012	24.0012	24.0012	24.0013	24.0012	24.0012	24.0012	24.0013	24.0012	24.0012	24.0012	24.0013	26.0873	641309	35.7084	0.635694	35.4408	24.0007	24.0007
08/04 15:20:00	31.1	531.3	23.4535	24.0005	24.0005	24.0005	24.7747	24.7759	24.0012	24.0012	24.0012	24.0013	24.0012	24.0012	24.0012	24.0013	24.0012	24.0012	24.0012	24.0013	26.115	641447	35.726	0.636661	35.4138	24.0007	24.0007
08/04 15:25:00	31.1	531.735	23.4506	24.0005	24.0005	24.0005	24.7755	24.7766	24.0012	24.0012	24.0012	24.0013	24.0012	24.0012	24.0012	24.0013	24.0012	24.0012	24.0012	24.0013	26.1415	641539	35.7347	0.637559	35.4195	24.0007	24.0007
08/04 15:30:00	31.1	531.719	23.4484	24.0005	24.0005	24.0005	24.7762	24.7772	24.0012	24.0012	24.0012	24.0013	24.0012	24.0012	24.0012	24.0013	24.0012	24.0012	24.0012	24.0013	26.1669	641607	35.7344	0.63838	35.4567	24.0007	24.0007
08/04 15:35:00	31.1	513.174	23.4466	24.0004	24.0005	24.0005	24.7772	24.7781	24.0011	24.0012	24.0012	24.0013	24.0011	24.0012	24.0012	24.0012	24.0012	24.0012	24.0012	24.0013	26.1923	641620	35.3635	0.639116	35.5243	24.0007	24.0007
08/04 15:40:00	31.1	494.868	23.4452	24.0004	24.0005	24.0005	24.7783	24.7791	24.0011	24.0012	24.0012	24.0013	24.0011	24.0012	24.0012	24.0012	24.0012	24.0012	24.0012	24.0012	26.2169	641593	34.9974	0.639759	35.5499	24.0007	24.0007
08/04 15:45:00	31.1	476.812	23.4441	24.0004	24.0005	24.0005	24.7794	24.7801	24.0011	24.0012	24.0012	24.0012	24.0011	24.0012	24.0011	24.0012	24.0011	24.0012	24.0012	24.0012	26.241	641536	34.6362	0.640302	35.5346	24.0007	24.0007
08/04 15:50:00	31.1	459.018	23.4431	24.0004	24.0005	24.0005	24.7793	24.7799	24.0012	24.0012	24.0012	24.0012	24.0012	24.0012	24.0011	24.0012	24.0012	24.0012	24.0012	24.0012	26.2597	641628	34.2804	0.640738	35.4793	24.0007	24.0007
08/04 15:55:00	31.1	441.495	23.4422	24.0004	24.0005	24.0005	24.7794	24.7799	24.0013	24.0012	24.0011	24.0012	24.0012	24.0012	24.0011	24.0012	24.0013	24.0012	24.0012	24.0012	26.2776	641730	33.9299	0.641078	35.3853	24.0007	24.0007
08/04 16:00:00	31.1	424.254	23.4413	24.0004	24.0005	24.0005	24.7803	24.7808	24.0013	24.0012	24.0011	24.0012	24.0012	24.0012	24.0011	24.0012	24.0013	24.0012	24.0012	24.0012	26.2965	641767	33.5851	0.641322	35.2536	24.0007	24.0007
08/04 16:05:00	31.1	407.304	23.4149	23.9881	24.0004	24.0005	24.7838	24.7856	24.0012	24.0011	24.0011	24.0012	24.0012	24.0011	24.0011	24.0011	24.0012	24.0011	24.0011	24.0011	26.3263	641077	33.2461	0.641461	35.0854	24.0007	24.0006
08/04 16:10:00	31.1	390.655	23.3953	23.9754	24.0004	24.0005	24.785	24.7884	24.0012	24.0011	24.0011	24.0012	24.0012	24.0011	24.0011	24.0011	24.0012	24.0011	24.0011	24.0011	26.3496	640265	32.9131	0.641494	34.8853	24.0007	24.0006
08/04 16:15:00	31.1	374.317	23.3815	23.9657	24.0004	24.0005	24.7847	24.7896	24.0012	24.0011	24.0011	24.0012	24.0012	24.0011	24.0011	24.0011	24.0012	24.0011	24.0011	24.0011	26.3688	639337	32.5863	0.641426	34.6546	24.0007	24.0006
08/04 16:20:00	31.1	358.297	23.3715	23.958	24.0004	24.0005	24.7838	24.7902	24.0012	24.0011	24.0011	24.0012	24.0012	24.0011	24.0011	24.0011	24.0012	24.0011	24.0011	24.0011	26.3857	638328	32.2659	0.641262	34.3944	24.0007	24.0006
08/04 16:25:00	31.1	342.605	23.364	23.9516	24.0004	24.0005	24.7828	24.7907	24.0012	24.0011	24.0011	24.0012	24.0012	24.0011	24.0011	24.0011	24.0012	24.0011	24.0011	24.0011	26.4015	637281	31.9521	0.641002	34.1061	24.0007	24.0006
08/04 16:30:00	31.1	327.248	23.3582	23.9461	24.0004	24.0004	24.7819	24.7911	24.0012	24.0011	24.0011	24.0012	24.0011	24.0011	24.0011	24.0011	24.0012	24.0011	24.0011	24.0011	26.4161	636217	31.645	0.640647	33.7909	24.0007	24.0006
08/04 16:35:00	31.1	310.843	23.3535	23.9411	24.0004	24.0004	24.7811	24.7916	24.0012	24.0011	24.0011	24.0012	24.0011	24.0011	24.0011	24.0011	24.0011	24.0011	24.0011	24.0011	26.4302	635138	31.3169	0.640198	33.4501	24.0007	24.0006
08/04 16:40:00	31.1	294.803	23.3496	23.9365	24.0004	24.0004	24.7808	24.7924	24.0012	24.0011	24.0011	24.0011	24.0011	24.0011	24.0011	24.0011	24.0011	24.0011	24.0011	24.0011	26.4443	634024	30.9961	0.639658	33.1129	24.0007	24.0006
08/04 16:45:00	31.1	279.136	23.3463	23.9322	24.0004	24.0004	24.7803	24.793	24.0011	24.0011	24.0011	24.0011	24.0011	24.0011	24.0011	24.0011	24.0011	24.0011	24.0011	24.0011	26.4571	632921	30.6827	0.639027	32.7794	24.0007	24.0006
08/04 16:50:00	31.1	263.849	23.3434	23.928	24.0004	24.0004	24.7797	24.7935	24.0011	24.0011	24.0011	24.0011	24.0011	24.0011	24.0011	24.0011	24.0011	24.0011	24.0011	24.0011	26.4685	631825	30.377	0.63831	32.45	24.0007	24.0006
08/04 16:55:00	31.1	248.948	23.3407	23.924	24.0004	24.0004	24.7792	24.794	24.0011	24.0011	24.0011	24.0011	24.0011	24.0011	24.0011	24.0011	24.0011	24.0011	24.0011	24.0011	26.4791	630734	30.079	0.637493	32.1247	24.0007	24.0006
08/04 17:00:00	31.1	234.439	23.3383	23.9201	24.0004	24.0004	24.7787	24.7945	24.0011	24.0011	24.0011	24.0011	24.0011	24.0011	24.0011	24.0011	24.0011	24.0011	24.0011	24.0011	26.4886	629647	29.7888	0.636576	31.8038	24.0007	24.0006
08/04 17:05:00	31.0083	220.329	23.3291	23.9046	23.9995	24.1532	24.8074	24.8334	24.4178	24.3979	24.4427	24.6569	24.5204	24.513	24.5656	24.7786	24.6559	24.6617	24.7065	24.8958	26.6786	629167	29.4149	0.635566	31.4874	24.0006	24.1777
08/04 17:10:00	30.9167	206.622	23.3159	23.8831	23.9971	24.3383	24.8556	24.8975	24.833	24.7789	24.8857	25.274	25.0302	24.9969	25.1209	25.4997	25.2912	25.2832	25.3924	25.7148	26.9237	629032	29.0491	0.634574	31.1681	24.0006	24.3472
08/04 17:15:00	30.825	193.323	23.3062	23.8686	23.9946	24.4463	24.9007	24.9562	25.0136	24.9326	25.0836	25.5267	25.2528	25.1947	25.3686	25.7973	25.5738	25.5465	25.7032	26.0558	27.0923	538549	28.6915	0.633638	30.8461	24.0006	24.4189
08/04 17:20:00	30.7333	180.438	23.3007	23.861	23.9933	24.5004	24.9305	24.9937	25.0787	24.9831	25.159	25.6126	25.336	25.2637	25.4655	25.9029	25.6873	25.648	25.8318	26.184	27.1901	467602	28.3421	0.625239	30.5216	24.0006	24.4452
08/04 17:25:00	30.6417	167.97	23.2964	23.8557	23.9927	24.54	24.9544	25.0253	25.1126	25.0062	25.2014	25.6535	25.3822	25.2992	25.5224	25.9576	25.757	25.7088	25.9137	26.2575	27.2663	440399	28.0011	0.611011	30.1946	24.0006	24.4599
08/04 17:30:00	30.55	155.923	23.2929	23.8519	23.9926	24.5712	24.9729	25.0507	25.1293	25.0146	25.2259	25.6694	25.4081	25.3169	25.5578	25.9843	25.8032	25.7478	25.9702	26.3012	27.3267	429913	27.6685	0.594605	29.8653	24.0006	24.4683
08/04 17:35:00	30.4583	144.241	23.2899	23.8489	23.9929	24.5972	24.9869	25.0707	25.1352	25.0138	25.2392	25.6715	25.4218	25.3239	25.5802	25.9959	25.8351	25.7738	26.0116	26.3286	27.3756	426055	27.3432	0.577413	29.534	24.0006	24.4729
08/04 17:40:00	30.3667	132.889	23.2872	23.8465	23.9932	24.6198	24.9972	25.0863	25.1339	25.0069	25.2452	25.6641	25.4274	25.3237	25.5942	25.9972	25.8576	25.7912	26.0432	26.345	27.4158	424877	27.0245	0.559989	29.2028	24.0006	24.4751
08/04 17:45:00	30.275	121.869	23.2848	23.8444	23.9935	24.64	25.0044	25.0982	25.1274	24.9956	25.2461	25.6498	25.4273	25.3187	25.6027	25.9912	25.8735	25.8026	26.0681	26.3534	27.4496	424791	26.7124	0.54256	28.8718	24.0006	24.4755
08/04 17:50:00	30.1833	111.184	23.2826	23.8424	23.9937	24.6584	25.0091	25.1071	25.1169	24.9807	25.2434	25.6298	25.4229	25.3097	25.6071	25.9793	25.8841	25.8092	26.088	26.3553	27.4779	425144	26.407	0.525216	28.541	24.0006	24.4745
08/04 17:55:00	30.0917	100.834	23.2805	23.8404	23.9938	24.6754	25.0118	25.1136	25.1032	24.9631	25.2378	25.6052	25.4151	25.2977	25.6085	25.9626	25.8907	25.8119	26.1042	26.3518	27.502	425657	26.1083	0.507992	28.2102	24.0006	24.4722
08/04 18:00:00	30	90.821	23.2785	23.8383	23.9936	24.6912	25.0128	25.118	25.0867	24.9431	25.2299	25.5764	25.4043	25.283	25.6074	25.9416	25.8936	25.8113	26.1171	26.3434	27.5221	426210	25.8164	0.490903	27.8793	24.0006	24.4689
08/04 18:05:00	29.9083	81.1466	23.2642	23.8155	23.9729	24.6865	25.0318	25.139	25.1058	24.9614	25.2566	25.5782	25.4239	25.301	25.6349	25.9452	25.9195	25.8356	26.151	26.353	27.6384	426589	25.5313	0.47395	27.5482	24.1777	24.4603
08/04 18:10:00	29.8167	71.8111	23.2544	23.8011	23.9606	24.6893	25.0439	25.1519	25.101	24.9532	25.2599	25.7349	25.4216	25.2948	25.6415	26.1082	25.9264	25.8392	26.1672	26.5279	27.7026	428044	25.2529	0.457068	27.2246	24.3472	24.4612
08/04 18:15:00	29.725	62.8149	23.2473	23.7922	23.9537	24.6968	25.0528	25.1609	25.0866	24.9344	25.2536	25.9024	25.4107	25.2792	25.6395	26.2807	25.926	25.8345	26.1759	26.6961	27.7397	430707	24.9813	0.440319	26.9083	24.4189	24.4641
08/04 18:20:00	29.6333	54.1581	23.242	23.7871	23.9504	24.7072	25.0595	25.1675	25.0675	24.9101	25.2398	25.9962	25.3956	25.2585	25.6298	26.3778	25.9216	25.8248	26.1772	26.7014	27.7603	433770	24.7165	0.431332	26.5991	24.4452	24.4639
08/04 18:25:00	29.5417	45.8405	23.2379	23.7842	23.9492	24.7194	25.0638	25.1718	25.0454	24.8826	25.2213	26.0374	25.3777	25.2346	25.6153	26.4228	25.9147	25.8124	26.1742	26.7018	27.771	436772	24.4585	0.428513	26.2969	24.4599	24.4611
08/04 18:30:00	29.45	37.8615	23.2345	23.7824	23.9489	24.732	25.0658	25.1741	25.0208	24.8529	25.1997	26.0394	25.3573	25.2084	25.5975	26.4292	25.9051	25.7973	26.1677	26.7019	27.7752	439458	24.2072	0.428211	26.0017	24.4683	24.4562
08/04 18:35:00	29.3583	33.8362	23.2316	23.7809	23.9488	24.7445	25.0656	25.1745	24.9955	24.823	25.1701	26.0008	25.3361	25.182	25.5714	26.3948	25.8945	25.7817	26.1524	26.7019	27.7752	441808	24.0351	0.429006	25.7133	24.4729	24.4481
08/04 18:40:00	29.2667	29.9875	23.2291	23.7793	23.9485	24.7561	25.0633	25.173	24.9706	24.7942	25.1415	25.9527	25.3153	25.1566	25.5465	26.3525	25.8838	25.7667	26.138	26.702	27.7713	443878	23.8664	0.430319	25.4376	24.4751	24.4396
08/04 18:45:00	29.175	26.3146	23.2267	23.7773	23.9479	24.7668	25.0595	25.1703	24.9459	24.7662	25.1167	25.9031	25.2944	25.1317	25.5259	26.3095	25.8726	25.7516	26.1273	26.702	27.7646	445733	23.7013	0.431902	25.1744	24.4755	24.4313
08/04 18:50:00	29.0833	22.8168	23.2245	23.775	23.9468	24.7766	25.0547	25.1667	24.921	24.7384	25.0941	25.8499	25.2732	25.1068	25.5075	26.2634	25.8606	25.7362	26.1184	26.7021	27.7555	447391	23.5397	0.433648	24.9235	24.4745	24.4227
08/04 18:55:00	28.9917	19.4934	23.2225	23.7723	23.9452	24.7854	25.0489	25.1627	24.8958	24.7105	25.0723	25.7931	25.2514	25.0817	25.4897	26.214	25.8477	25.7201	26.1097	26.6808	27.7443	448905	23.3815	0.435501	24.6846	24.4722	24.4135
08/04 19:00:00	28.9	16.3432	23.2205	23.7692	23.9433	24.7934	25.0423	25.1581	24.8702	24.6826	25.0502	25.7325	25.229	25.0562	25.4715	26.1608	25.834	25.7033	26.1001	26.645	27.7308	450300	23.2269	0.437439	24.4573	24.4689	24.4038
08/04 19:05:00	28.85	0	23.2185	23.7655	23.9407	24.8005	25.0349	25.153	24.836	24.6454	24.9997	25.5746	25.1976	25.0209	25.4231	26.0079	25.8105	25.6762	26.0593	26.5037	27.7176	451589	22.85	0.439446	24.2415	24.4603	24.3836
08/04 19:10:00	28.8	0	23.2166	23.761	23.9373	24.8062	25.0255	25.1457	24.8042	24.6113	24.9465	25.4308	25.1685	24.9888	25.3728	25.8715	25.7891	25.6519	26.0163	26.3772	27.7021	452766	22.8	0.44153	24.0181	24.4612	24.3639
08/04 19:15:00	28.75	0	23.2147	23.7556	23.933	24.8105	25.0148	25.1371	24.777	24.5824	24.9022	25.3205	25.144	24.9618	25.3319	25.7698	25.772	25.6324	25.9828	26.285	27.685	453816	22.75	0.44359	23.8137	24.4641	24.3472
08/04 19:20:00	28.7	0	23.2128	23.7495	23.928	24.8138	25.0038	25.1281	24.7528	24.5568	24.8645	25.2324	25.1223	24.9379	25.2974	25.6896	25.7574	25.6155	25.9554	26.2132	27.6668	454733	22.7	0.445516	23.6278	24.4639	24.3325
08/04 19:25:00	28.65	0	23.2109	23.7432	23.9228	24.8164	24.993	25.119	24.7309	24.5335	24.8315	25.1593	25.1027	24.916	25.2674	25.6236	25.7445	25.6004	25.9322	26.1548	27.6479	455527	22.65	0.447263	23.4597	24.4611	24.319
08/04 19:30:00	28.6	0	23.209	23.7369	23.9175	24.8186	24.9828	25.1098	24.7108	24.512	24.8022	25.097	25.0846	24.8957	25.2406	25.5674	25.7328	25.5866	25.912	26.1056	27.6282	456212	22.6	0.448826	23.309	24.4562	24.3067
08/04 19:35:00	28.55	0	23.2071	23.7307	23.9124	24.8204	24.9732	25.1009	24.6922	24.492	24.7757	25.0426	25.0677	24.8766	25.2163	25.5182	25.7219	25.5736	25.8938	26.0628	27.608	456796	22.55	0.450222	23.1751	24.4481	24.2953
08/04 19:40:00	28.5	0	23.2052	23.7247	23.9074	24.8221	24.9642	25.0925	24.6747	24.4731	24.7514	24.9943	25.0517	24.8584	25.1938	25.4743	25.7116	25.5612	25.8772	26.0249	27.5871	457290	22.5	0.451471	23.0513	24.4396	24.2846
08/04 19:45:00	28.45	0	23.2033	23.7189	23.9026	24.8235	24.9558	25.0846	24.6582	24.4552	24.729	24.9509	25.0366	24.8411	25.1727	25.4346	25.7019	25.5494	25.8617	25.9907	27.5657	457702	22.45	0.452588	22.9374	24.4313	24.2745
08/04 19:50:00	28.4	0	23.2014	23.7133	23.8979	24.8248	24.948	25.0772	24.6425	24.4382	24.7081	24.9117	25.0221	24.8244	25.153	25.3984	25.6925	25.5379	25.8472	25.9597	27.5436	458040	22.4	0.453586	22.8332	24.4227	24.265
08/04 19:55:00	28.35	0	23.1995	23.708	23.8935	24.826	24.9407	25.0703	24.6277	24.422	24.6885	24.876	25.0081	24.8083	25.1342	25.365	25.6833	25.5267	25.8334	25.9311	27.521	458308	22.35	0.454473	22.7382	24.4135	24.2559
08/04 20:00:00	28.3	0	23.1975	23.7028	23.8893	24.827	24.9339	25.0638	24.6135	24.4064	24.6701	24.8433	24.9947	24.7927	25.1163	25.3341	25.6744	25.5158	25.8202	25.9047	27.4977	458513	22.3	0.455257	22.6522	24.4038	24.2473
08/04 20:05:00	28.2583	0	23.1956	23.6979	23.8852	24.8278	24.9275	25.0577	24.6	24.3916	24.6528	24.8133	24.9822	24.778	25.0995	25.3057	25.6661	25.5053	25.8077	25.8805	27.4744	459030	22.2583	0.455941	22.575	24.3836	24.2392
08/04 20:10:00	28.2167	0	23.1936	23.6934	23.8815	24.8287	24.9215	25.052	24.5871	24.3774	24.6365	24.7857	24.9701	24.7636	25.0835	25.2792	25.658	25.4951	25.7958	25.8581	27.4509	459883	22.2167	0.456561	22.5257	24.3639	24.2316
08/04 20:15:00	28.175	0	23.1916	23.6889	23.8779	24.8294	24.9158	25.0466	24.5748	24.3637	24.6211	24.7601	24.9585	24.7498	25.0682	25.2545	25.6502	25.485	25.7843	25.8369	27.427	460898	22.175	0.457154	22.4771	24.3472	24.2243
08/04 20:20:00	28.1333	0	23.1897	23.6846	23.8743	24.8298	24.9104	25.0415	24.5629	24.3504	24.6063	24.7363	24.9473	24.7363	25.0534	25.2311	25.6424	25.4751	25.7732	25.8169	27.4028	462010	22.1333	0.457744	22.4292	24.3325	24.2172
08/04 20:25:00	28.0917	0	23.1877	23.6803	23.8709	24.83	24.9053	25.0367	24.5515	24.3376	24.5922	24.714	24.9364	24.7231	25.0391	25.209	25.6347	25.4652	25.7622	25.7979	27.3782	463177	22.0917	0.458351	22.3819	24.319	24.2104
08/04 20:30:00	28.05	0	23.1857	23.6762	23.8675	24.8301	24.9004	25.0321	24.5403	24.3251	24.5786	24.6931	24.9258	24.7102	25.0254	25.1881	25.6271	25.4554	25.7515	25.7798	27.3532	464373	22.05	0.458988	22.3354	24.3067	24.2038
08/04 20:35:00	28.0083	0	23.1837	23.6722	23.8642	24.83	24.8956	25.0277	24.5295	24.313	24.5656	24.6733	24.9154	24.6976	25.012	25.1681	25.6194	25.4457	25.741	25.7624	27.3279	465583	22.0083	0.459668	22.2896	24.2953	24.1973
08/04 20:40:00	27.9667	0	23.1817	23.6683	23.861	24.8297	24.8911	25.0234	24.519	24.3012	24.553	24.6547	24.9052	24.6852	24.9989	25.149	25.6117	25.4359	25.7306	25.7456	27.3022	466797	21.9667	0.460401	22.2444	24.2846	24.1911
08/04 20:45:00	27.925	0	23.1796	23.6645	23.8578	24.8293	24.8867	25.0192	24.5088	24.2896	24.5408	24.637	24.8952	24.673	24.9862	25.1306	25.604	25.4261	25.7203	25.7294	27.2762	468009	21.925	0.461193	22.2	24.2745	24.185
08/04 20:50:00	27.8833	0	23.1776	23.6608	23.8548	24.8287	24.8824	25.0152	24.4987	24.2783	24.529	24.6202	24.8854	24.661	24.9738	25.1129	25.5963	25.4164	25.7101	25.7136	27.2498	469216	21.8833	0.462052	22.1562	24.265	24.179
08/04 20:55:00	27.8417	0	23.1756	23.6572	23.8517	24.8279	24.8782	25.0113	24.4889	24.2672	24.5175	24.6041	24.8757	24.6492	24.9616	25.0958	25.5885	25.4065	25.6999	25.6983	27.2233	470415	21.8417	0.462983	22.1132	24.2559	24.1732
08/04 21:00:00	27.8	0	23.1735	23.6537	23.8488	24.827	24.8741	25.0074	24.4793	24.2562	24.5064	24.5887	24.8662	24.6375	24.9497	25.0793	25.5807	25.3967	25.6898	25.6833	27.1964	471605	21.8	0.463992	22.0708	24.2473	24.1674
08/04 21:05:00	27.8417	0	23.1715	23.6502	23.8459	24.8258	24.8706	25.0041	24.4722	24.248	24.4979	24.5764	24.8592	24.6284	24.9404	25.0657	25.5751	25.3892	25.682	25.6709	27.1748	472326	21.8417	0.465083	22.0292	24.2392	24.1625
08/04 21:10:00	27.8833	0	23.1694	23.6463	23.8426	24.8242	24.8674	25.0012	24.4664	24.2409	24.4907	24.5656	24.8534	24.6205	24.9324	25.0536	25.5706	25.3827	25.6753	25.6599	27.1562	472559	21.8833	0.466191	21.9944	24.2316	24.1578
08/04 21:15:00	27.925	0	23.1674	23.6427	23.8395	24.8226	24.8647	24.9986	24.4614	24.2346	24.4844	24.556	24.8483	24.6133	24.9251	25.0425	25.5665	25.3767	25.6693	25.6497	27.1395	472521	21.925	0.467247	21.9667	24.2243	24.1534
08/04 21:20:00	27.9667	0	23.1653	23.6393	23.8366	24.8209	24.8622	24.9964	24.457	24.2288	24.4788	24.5471	24.8437	24.6065	24.9184	25.0321	25.5628	25.371	25.6636	25.64	27.1239	472295	21.9667	0.468216	21.9458	24.2172	24.1493
08/04 21:25:00	28.0083	0	23.1633	23.6359	23.8338	24.8192	24.86	24.9943	24.4529	24.223	24.4736	24.5389	24.8395	24.6008	24.9121	25.0222	25.5593	25.3664	25.6582	25.6307	27.1091	471932	22.0083	0.469073	21.9319	24.2104	24.1455
08/04 21:30:00	28.05	0	23.1612	23.6327	23.831	24.8175	24.8579	24.9925	24.4491	24.2178	24.4687	24.5313	24.8355	24.5952	24.9062	25.0129	25.556	25.3617	25.653	25.6218	27.0949	471464	22.05	0.469803	21.925	24.2038	24.1418
08/04 21:35:00	28.0917	0	23.1591	23.6295	23.8284	24.8157	24.856	24.9908	24.4457	24.2129	24.4642	24.5242	24.8317	24.5897	24.9005	25.0039	25.5528	25.357	25.648	25.6132	27.0811	470911	22.0917	0.470394	21.925	24.1973	24.1382
08/04 21:40:00	28.1333	0	23.1571	23.6264	23.8257	24.8138	24.8542	24.9893	24.4424	24.2084	24.46	24.5175	24.8281	24.5843	24.8951	24.9953	25.5496	25.3522	25.6431	25.6049	27.0678	470286	22.1333	0.470838	21.9319	24.1911	24.1347
08/04 21:45:00	28.175	0	23.155	23.6234	23.8231	24.8119	24.8526	24.9878	24.4394	24.2041	24.456	24.5111	24.8247	24.5791	24.89	24.9871	25.5465	25.3475	25.6384	25.5968	27.0547	469598	22.175	0.471128	21.9458	24.185	24.1313
08/04 21:50:00	28.2167	0	23.1529	23.6204	23.8206	24.8099	24.851	24.9865	24.4365	24.2	24.4523	24.5052	24.8214	24.574	24.885	24.9782	25.5435	25.3429	25.6338	25.5878	27.042	468854	22.2167	0.471261	21.9667	24.179	24.128
08/04 21:55:00	28.2583	0	23.1509	23.6174	23.8181	24.8079	24.8495	24.9852	24.4338	24.1961	24.4488	24.4995	24.8183	24.5691	24.8802	24.9699	25.5406	25.3383	25.6293	25.5796	27.0296	468059	22.2583	0.471231	21.9944	24.1732	24.1247
08/04 22:00:00	28.3	0	23.1488	23.6145	23.8156	24.8058	24.848	24.9839	24.4312	24.1923	24.4454	24.494	24.8153	24.5643	24.8757	24.9622	25.5377	25.3338	25.625	25.5717	27.0175	467217	22.3	0.471034	22.0292	24.1674	24.1215
08/04 22:05:00	28.3	0	23.1467	23.6117	23.8132	24.8036	24.8464	24.9825	24.4272	24.1871	24.4407	24.4871	24.8111	24.5582	24.8698	24.9533	25.5335	25.3279	25.6193	25.5628	27.003	466608	22.3	0.470669	22.0708	24.1625	24.118
08/04 22:10:00	28.3	0	23.1446	23.6088	23.8108	24.8015	24.8446	24.9809	24.4225	24.1813	24.4353	24.4799	24.8062	24.5516	24.8634	24.9451	25.5287	25.3215	25.613	25.5545	26.9871	466247	22.3	0.470192	22.109	24.1578	24.1144
08/04 22:15:00	28.3	0	23.1426	23.6061	23.8084	24.7992	24.8427	24.9792	24.4175	24.1752	24.4297	24.4723	24.801	24.5447	24.8567	24.9363	25.5235	25.3147	25.6064	25.5456	26.9706	466001	22.3	0.469666	22.1438	24.1534	24.1107
08/04 22:20:00	28.3	0	23.1405	23.6033	23.806	24.797	24.8407	24.9773	24.4124	24.1689	24.4239	24.4647	24.7957	24.5377	24.85	24.9272	25.5181	25.3077	25.5996	25.5363	26.9537	465822	22.3	0.469123	22.175	24.1493	24.107
08/04 22:25:00	28.3	0	23.1384	23.6005	23.8036	24.7946	24.8386	24.9754	24.4071	24.1625	24.418	24.4571	24.7902	24.5293	24.8431	24.918	25.5125	25.2992	25.5927	25.5268	26.9367	465681	22.3	0.468583	22.2028	24.1455	24.1032
08/04 22:30:00	28.3	0	23.1364	23.5978	23.8013	24.7922	24.8364	24.9734	24.4018	24.156	24.4121	24.4495	24.7848	24.5215	24.8363	24.9088	25.5069	25.2914	25.5857	25.5173	26.9196	465562	22.3	0.468062	22.2271	24.1418	24.0994
08/04 22:35:00	28.3	0	23.1343	23.5951	23.799	24.7898	24.8341	24.9714	24.3964	24.1496	24.4061	24.4418	24.7793	24.514	24.8295	24.8997	25.5012	25.2837	25.5787	25.5077	26.9026	465456	22.3	0.46757	22.2479	24.1382	24.0956
08/04 22:40:00	28.3	0	23.1322	23.5923	23.7966	24.7873	24.8319	24.9693	24.391	24.1431	24.4002	24.4343	24.7738	24.5067	24.8226	24.8905	25.4954	25.2761	25.5716	25.4981	26.8858	465356	22.3	0.467116	22.2653	24.1347	24.0919
08/04 22:45:00	28.3	0	23.1302	23.5896	23.7943	24.7847	24.8295	24.9672	24.3855	24.1367	24.3942	24.4267	24.7683	24.4993	24.8158	24.8815	25.4895	25.2685	25.5645	25.4885	26.8691	465260	22.3	0.466705	22.2792	24.1313	24.0882
08/04 22:50:00	28.3	0	23.1281	23.5869	23.792	24.7821	24.8272	24.9651	24.3801	24.1303	24.3883	24.4191	24.7628	24.4921	24.809	24.8724	25.4836	25.2609	25.5573	25.4789	26.8527	465165	22.3	0.466343	22.2896	24.128	24.0844
08/04 22:55:00	28.3	0	23.126	23.5843	23.7897	24.7794	24.8248	24.9629	24.3746	24.1238	24.3824	24.4116	24.7572	24.4848	24.8023	24.8634	25.4776	25.2533	25.5501	25.4693	26.8365	465071	22.3	0.466036	22.2965	24.1247	24.0807
08/04 23:00:00	28.3	0	23.124	23.5816	23.7874	24.7767	24.8224	24.9607	24.3691	24.1174	24.3764	24.4041	24.7517	24.4776	24.7956	24.8545	25.4716	25.2456	25.5429	25.4597	26.8206	464977	22.3	0.465787	22.3	24.1215	24.077
08/04 23:05:00	27.75	0	23.1219	23.5789	23.7851	24.774	24.8171	24.9556	24.351	24.0981	24.3579	24.3838	24.7334	24.4574	24.7761	24.8326	25.4528	25.2249	25.5229	25.437	26.7686	461524	21.75	0.4656	22.3	24.118	24.0694
08/04 23:10:00	27.2	0	23.1198	23.5762	23.7827	24.7712	24.8094	24.9481	24.3265	24.0727	24.333	24.3574	24.7086	24.4311	24.7512	24.8045	25.4275	25.1983	25.4977	25.4084	26.6944	454688	21.2	0.465177	22.2542	24.1144	24.0599
08/04 23:15:00	26.65	0	23.1178	23.5735	23.7804	24.7682	24.7998	24.9386	24.2983	24.044	24.3044	24.3277	24.6802	24.4016	24.7224	24.7731	25.3986	25.1681	25.4685	25.3765	26.6065	446217	20.65	0.464213	22.1625	24.1107	24.0493
08/04 23:20:00	26.1	0	23.1157	23.5708	23.778	24.7651	24.7887	24.9276	24.2679	24.0132	24.2735	24.2959	24.6495	24.3699	24.6911	24.7397	25.3674	25.1359	25.4364	25.3423	26.5094	436822	20.1	0.462565	22.025	24.107	24.038
08/04 23:25:00	25.55	0	23.1137	23.568	23.7756	24.7616	24.7764	24.9153	24.236	23.9809	24.2411	24.2627	24.6174	24.337	24.6581	24.7049	25.3344	25.1019	25.4025	25.3065	26.4084	426944	19.55	0.460148	21.8417	24.1032	24.0262
08/04 23:30:00	25	0	23.1116	23.5651	23.7731	24.7578	24.7631	24.9019	24.2029	23.9476	24.2075	24.2284	24.5835	24.3029	24.6238	24.669	25.2993	25.0666	25.3671	25.2694	26.3089	416857	19	0.45692	21.6125	24.0994	24.0139
08/04 23:35:00	24.45	0	23.1096	23.5622	23.7705	24.7536	24.7489	24.8879	24.169	23.9135	24.1731	24.1933	24.5489	24.268	24.5887	24.6323	25.2633	25.03	25.3304	25.231	26.2112	406738	18.45	0.452861	21.3375	24.0956	24.0013
08/04 23:40:00	23.9	0	23.1075	23.5592	23.7679	24.7489	24.7342	24.8738	24.1344	23.8786	24.138	24.1575	24.5139	24.2323	24.5529	24.5948	25.2265	24.9924	25.2925	25.1915	26.1147	396698	17.9	0.447968	21.0167	24.0919	23.9885
08/04 23:45:00	23.35	0	23.1054	23.5561	23.7651	24.7436	24.7194	24.8597	24.0993	23.8432	24.1023	24.1211	24.4783	24.196	24.5164	24.5567	25.1887	24.9537	25.2537	25.151	26.0191	424892	17.35	0.442247	20.65	24.0882	23.9754
08/04 23:50:00	22.8	0	23.1034	23.5529	23.7622	24.7378	24.7047	24.8455	24.0636	23.8072	24.0662	24.0842	24.4423	24.1591	24.4793	24.518	25.1501	24.9141	25.214	25.1096	25.9238	452945	16.8	0.438883	20.2375	24.0844	23.9621
08/04 23:55:00	22.25	0	23.1013	23.5496	23.7593	24.7314	24.69	24.8313	24.0275	23.7707	24.0297	24.0468	24.4058	24.1216	24.4418	24.4788	25.1108	24.8736	25.1736	25.0674	25.8287	445415	16.25	0.437864	19.7792	24.0807	23.9486
08/04 24:00:00	21.7	0	23.0992	23.5463	23.7562	24.7245	24.6754	24.8172	23.9911	23.7338	23.9928	24.0089	24.3689	24.0837	24.404	24.4391	25.0708	24.8324	25.1325	25.0244	25.7334	424725	15.7	0.436226	19.275	24.077	23.9349
08/05 00:05:00	21.5583	0	23.0972	23.5428	23.7531	24.7171	24.6631	24.8053	23.9631	23.7056	23.9645	23.9798	24.3406	24.0547	24.3747	24.4082	25.039	24.7996	25.0997	24.9899	25.6632	407703	15.5583	0.432872	18.725	24.0694	23.9237
08/05 00:10:00	21.4167	0	23.0951	23.5392	23.7498	24.7091	24.6524	24.7949	23.9393	23.6815	23.9403	23.9547	24.3163	24.0294	24.3495	24.3812	25.0108	24.7705	25.0707	24.959	25.6042	397477	15.4167	0.428387	18.209	24.0599	23.9137
08/05 00:15:00	21.275	0	23.0931	23.5355	23.7464	24.7009	24.6429	24.7857	23.9176	23.6594	23.9184	23.9315	24.294	24.0062	24.3265	24.3563	24.9845	24.7431	25.0438	24.9298	25.5507	390149	15.275	0.423619	17.7271	24.0493	23.9043
08/05 00:20:00	21.1333	0	23.091	23.5319	23.743	24.6925	24.6343	24.7774	23.8972	23.6384	23.8978	23.9096	24.273	23.984	24.3047	24.3323	24.9593	24.7167	25.0178	24.9016	25.5003	384273	15.1333	0.418947	17.2792	24.038	23.8952
08/05 00:25:00	20.9917	0	23.089	23.5282	23.7397	24.684	24.6262	24.7696	23.8776	23.6182	23.878	23.8883	24.2526	23.9625	24.2837	24.3092	24.9346	24.6908	24.9923	24.874	25.4516	379186	14.9917	0.414568	16.8653	24.0262	23.8863
08/05 00:30:00	20.85	0	23.0869	23.5245	23.7363	24.6755	24.6186	24.7622	23.8585	23.5985	23.8589	23.8675	24.2327	23.9413	24.2632	24.2864	24.9103	24.6652	24.9672	24.8467	25.4041	374560	14.85	0.410588	16.4854	24.0139	23.8776
08/05 00:35:00	20.7083	0	23.0848	23.5209	23.7329	24.6669	24.6112	24.7551	23.8398	23.5791	23.8402	23.8472	24.2131	23.9204	24.2431	24.2639	24.8862	24.6398	24.9424	24.8199	25.3573	370221	14.7083	0.407063	16.1396	24.0013	23.8689
08/05 00:40:00	20.5667	0	23.0828	23.5172	23.7295	24.6583	24.6041	24.7481	23.8216	23.56	23.8219	23.8271	24.1939	23.8998	24.2232	24.2418	24.8622	24.6148	24.9177	24.7934	25.3112	366069	14.5667	0.40402	15.8278	23.9885	23.8604
08/05 00:45:00	20.425	0	23.0807	23.5136	23.7262	24.6496	24.5972	24.7414	23.8035	23.5412	23.8038	23.8072	24.1749	23.8794	24.2034	24.2197	24.8384	24.5899	24.8931	24.7669	25.2654	362045	14.425	0.401468	15.55	23.9754	23.8519
08/05 00:50:00	20.2833	0	23.0786	23.51	23.7228	24.641	24.5903	24.7347	23.7857	23.5226	23.7858	23.7876	24.1559	23.8591	24.1836	24.198	24.8145	24.5651	24.8683	24.7405	25.22	358115	14.2833	0.396231	15.3062	23.9621	23.8435
08/05 00:55:00	20.1417	0	23.0766	23.5063	23.7195	24.6322	24.5835	24.7281	23.7682	23.5042	23.7679	23.7682	24.137	23.839	24.1638	24.1763	24.7909	24.5406	24.8436	24.7142	25.1748	354255	14.1417	0.388328	15.0965	23.9486	23.835
08/05 01:00:00	20	0	23.0745	23.5027	23.7161	24.6234	24.5769	24.7216	23.7508	23.4859	23.7502	23.7489	24.1182	23.8189	24.1442	24.1548	24.7673	24.5161	24.819	24.6879	25.1298	350453	14	0.380732	14.9208	23.9349	23.8266
08/05 01:05:00	20.05	0	23.0724	23.4992	23.7128	24.6146	24.5712	24.7161	23.7376	23.4724	23.7369	23.7343	24.1038	23.8034	24.129	24.1377	24.7481	24.4957	24.7988	24.6661	25.0966	348133	14.05	0.374542	14.7792	23.9237	23.8196
08/05 01:10:00	20.1	0	23.0703	23.4956	23.7094	24.6057	24.5664	24.7114	23.7266	23.4609	23.7258	23.7217	24.0914	23.7901	24.1161	24.1227	24.7308	24.4774	24.7809	24.6461	25.0688	347405	14.1	0.369578	14.6535	23.9137	23.8132
08/05 01:15:00	20.15	0	23.0683	23.492	23.7061	24.5967	24.5621	24.7072	23.7167	23.4508	23.716	23.7105	24.0803	23.778	24.1044	24.109	24.7148	24.4602	24.7642	24.6274	25.0437	347391	14.15	0.365405	14.5438	23.9043	23.8073
08/05 01:20:00	20.2	0	23.0662	23.4885	23.7028	24.5878	24.5582	24.7034	23.7078	23.4414	23.7071	23.7	24.07	23.7666	24.0935	24.0959	24.6997	24.4439	24.7483	24.6094	25.0204	347742	14.2	0.361842	14.45	23.8952	23.8016
08/05 01:25:00	20.25	0	23.0641	23.485	23.6995	24.579	24.5546	24.7	23.6994	23.4326	23.6988	23.6901	24.0603	23.7558	24.0833	24.0836	24.685	24.4282	24.7331	24.592	24.9982	348294	14.25	0.358798	14.3722	23.8863	23.796
08/05 01:30:00	20.3	0	23.062	23.4816	23.6963	24.5702	24.5513	24.6967	23.6916	23.4243	23.691	23.6807	24.0509	23.7455	24.0734	24.0716	24.6709	24.413	24.7183	24.5751	24.9769	348965	14.3	0.356224	14.3104	23.8776	23.7907
08/05 01:35:00	20.35	0	23.0599	23.4782	23.6931	24.5615	24.5481	24.6936	23.6843	23.4164	23.6836	23.6717	24.0419	23.7356	24.0639	24.0601	24.6571	24.3981	24.704	24.5587	24.9561	349709	14.35	0.354091	14.2646	23.8689	23.7854
08/05 01:40:00	20.4	0	23.0578	23.4748	23.6899	24.5529	24.545	24.6906	23.6772	23.4089	23.6765	23.663	24.0331	23.7259	24.0548	24.0488	24.6437	24.3837	24.6899	24.5426	24.936	350498	14.4	0.352381	14.2347	23.8604	23.7803
08/05 01:45:00	20.45	0	23.0557	23.4715	23.6867	24.5443	24.542	24.6877	23.6705	23.4017	23.6696	23.6547	24.0246	23.7166	24.0459	24.0379	24.6305	24.3695	24.6762	24.5267	24.9163	351316	14.45	0.351084	14.2208	23.8519	23.7753
08/05 01:50:00	20.5	0	23.0536	23.4682	23.6836	24.5358	24.5391	24.6848	23.6641	23.3948	23.6631	23.6467	24.0165	23.7075	24.0372	24.0272	24.6177	24.3557	24.6628	24.5113	24.897	352153	14.5	0.35019	14.2229	23.8435	23.7704
08/05 01:55:00	20.55	0	23.0515	23.4649	23.6805	24.5273	24.5363	24.6821	23.6579	23.3881	23.6568	23.6389	24.0085	23.6988	24.0287	24.0168	24.605	24.3421	24.6496	24.496	24.8781	353002	14.55	0.349693	14.241	23.835	23.7656
08/05 02:00:00	20.6	0	23.0494	23.4617	23.6774	24.5188	24.5335	24.6793	23.652	23.3816	23.6508	23.6313	24.0008	23.6901	24.0204	24.0066	24.5925	24.3288	24.6365	24.481	24.8595	353858	14.6	0.349588	14.275	23.8266	23.7608
08/05 02:05:00	20.6	0	23.0473	23.4585	23.6744	24.5103	24.5305	24.6764	23.6451	23.3742	23.6439	23.6228	23.9923	23.6806	24.0113	23.9955	24.5791	24.3145	24.6226	24.465	24.8382	354454	14.6	0.349872	14.325	23.8196	23.7558
08/05 02:10:00	20.6	0	23.0452	23.4554	23.6713	24.5019	24.5274	24.6733	23.6379	23.3664	23.6366	23.6139	23.9833	23.6706	24.0018	23.9839	24.5653	24.2998	24.6082	24.4487	24.8158	354761	14.6	0.350399	14.3708	23.8132	23.7507
08/05 02:15:00	20.6	0	23.0432	23.4522	23.6683	24.4934	24.5242	24.6701	23.6305	23.3585	23.6292	23.6049	23.9742	23.6606	23.9922	23.9723	24.5513	24.2849	24.5937	24.4322	24.7928	354937	14.6	0.351012	14.4125	23.8073	23.7456
08/05 02:20:00	20.6	0	23.0411	23.4491	23.6653	24.4849	24.5209	24.6668	23.6231	23.3505	23.6217	23.5958	23.965	23.6505	23.9826	23.9607	24.5373	24.27	24.5791	24.4157	24.7696	355045	14.6	0.351641	14.45	23.8016	23.7405
08/05 02:25:00	20.6	0	23.039	23.446	23.6623	24.4764	24.5175	24.6635	23.6156	23.3426	23.6142	23.5868	23.9559	23.6404	23.9729	23.9491	24.5232	24.2551	24.5645	24.3992	24.7463	355115	14.6	0.352249	14.4833	23.796	23.7354
08/05 02:30:00	20.6	0	23.0369	23.4429	23.6593	24.4678	24.5141	24.6602	23.6082	23.3347	23.6068	23.5778	23.9468	23.6304	23.9634	23.9376	24.5091	24.2402	24.5499	24.3827	24.7229	355163	14.6	0.352818	14.5125	23.7907	23.7302
08/05 02:35:00	20.6	0	23.0348	23.4398	23.6564	24.4592	24.5107	24.6568	23.6008	23.3268	23.5993	23.5688	23.9377	23.6204	23.9538	23.9261	24.495	24.2254	24.5353	24.3662	24.6996	355198	14.6	0.353334	14.5375	23.7854	23.7252
08/05 02:40:00	20.6	0	23.0327	23.4368	23.6534	24.4505	24.5073	24.6534	23.5934	23.319	23.5919	23.5599	23.9287	23.6105	23.9443	23.9146	24.4809	24.2105	24.5207	24.3498	24.6763	355223	14.6	0.353792	14.5583	23.7803	23.7201
08/05 02:45:00	20.6	0	23.0306	23.4337	23.6504	24.4418	24.5039	24.65	23.5861	23.3112	23.5846	23.551	23.9197	23.6006	23.9349	23.9033	24.4668	24.1956	24.5062	24.3334	24.6531	355243	14.6	0.354185	14.575	23.7753	23.715
08/05 02:50:00	20.6	0	23.0285	23.4307	23.6474	24.433	24.5004	24.6466	23.5788	23.3034	23.5773	23.5422	23.9107	23.5908	23.9255	23.892	24.4527	24.1808	24.4916	24.317	24.63	355260	14.6	0.354513	14.5875	23.7704	23.71
08/05 02:55:00	20.6	0	23.0265	23.4276	23.6445	24.4241	24.497	24.6431	23.5716	23.2957	23.57	23.5334	23.9018	23.5811	23.9161	23.8807	24.4387	24.166	24.477	24.3006	24.6069	355274	14.6	0.354771	14.5958	23.7656	23.705
08/05 03:00:00	20.6	0	23.0244	23.4246	23.6415	24.4153	24.4935	24.6397	23.5643	23.288	23.5627	23.5246	23.8929	23.5714	23.9068	23.8695	24.4246	24.1512	24.4625	24.2843	24.584	355286	14.6	0.354961	14.6	23.7608	23.7
08/05 03:05:00	20.55	0	23.0223	23.4215	23.6385	24.4063	24.4898	24.636	23.556	23.2792	23.5544	23.5147	23.8829	23.5605	23.8965	23.8572	24.4094	24.1352	24.4468	24.2667	24.5581	354572	14.55	0.35508	14.6	23.7558	23.6947
08/05 03:10:00	20.5	0	23.0202	23.4185	23.6355	24.3974	24.4859	24.6321	23.5472	23.2699	23.5456	23.5043	23.8724	23.5491	23.8857	23.8444	24.3936	24.1186	24.4306	24.2487	24.5309	353064	14.5	0.35509	14.5958	23.7507	23.6892
08/05 03:15:00	20.45	0	23.0181	23.4155	23.6326	24.3883	24.4818	24.628	23.5381	23.2603	23.5365	23.4936	23.8617	23.5375	23.8746	23.8313	24.3775	24.1018	24.414	24.2304	24.503	351207	14.45	0.354948	14.5875	23.7456	23.6836
08/05 03:20:00	20.4	0	23.0161	23.4125	23.6296	24.3792	24.4776	24.6239	23.5288	23.2505	23.5272	23.4828	23.8508	23.5257	23.8634	23.8182	24.3612	24.0848	24.3973	24.212	24.4747	349180	14.4	0.354637	14.575	23.7405	23.678
08/05 03:25:00	20.35	0	23.014	23.4094	23.6266	24.3701	24.4734	24.6196	23.5194	23.2406	23.5179	23.4719	23.8398	23.5139	23.8521	23.8049	24.3448	24.0677	24.3805	24.1934	24.4463	347070	14.35	0.354149	14.5583	23.7354	23.6724
08/05 03:30:00	20.3	0	23.0119	23.4064	23.6236	24.3608	24.4691	24.6153	23.5099	23.2307	23.5085	23.4609	23.8288	23.502	23.8407	23.7916	24.3282	24.0504	24.3635	24.1747	24.4178	344919	14.3	0.353478	14.5375	23.7302	23.6667
08/05 03:35:00	20.25	0	23.0099	23.4034	23.6206	24.3515	24.4647	24.611	23.5003	23.2207	23.499	23.4498	23.8177	23.49	23.8292	23.7782	24.3115	24.033	24.3463	24.1559	24.3893	342752	14.25	0.352625	14.5125	23.7252	23.661
08/05 03:40:00	20.2	0	23.0078	23.4003	23.6176	24.3421	24.4603	24.6066	23.4907	23.2107	23.4894	23.4388	23.8066	23.478	23.8176	23.7648	24.2947	24.0156	24.3291	24.137	24.3608	340582	14.2	0.351587	14.4833	23.7201	23.6553
08/05 03:45:00	20.15	0	23.0057	23.3973	23.6146	24.3326	24.4559	24.6022	23.4811	23.2006	23.4798	23.4276	23.7954	23.466	23.8061	23.7514	24.2778	23.9981	24.3118	24.1181	24.3323	338418	14.15	0.350367	14.45	23.715	23.6495
08/05 03:50:00	20.1	0	23.0037	23.3942	23.6115	24.323	24.4514	24.5977	23.4714	23.1905	23.4701	23.4165	23.7842	23.4539	23.7944	23.738	24.2608	23.9805	24.2943	24.0991	24.3039	336265	14.1	0.348965	14.4125	23.71	23.6438
08/05 03:55:00	20.05	0	23.0016	23.3912	23.6085	24.3134	24.4469	24.5933	23.4618	23.1804	23.4604	23.4053	23.7729	23.4419	23.7828	23.7245	24.2438	23.9628	24.2769	24.0799	24.2755	334127	14.05	0.347382	14.3708	23.705	23.638
08/05 04:00:00	20	0	22.9996	23.3881	23.6054	24.3037	24.4424	24.5888	23.4521	23.1702	23.4506	23.3942	23.7616	23.4298	23.7711	23.7111	24.2267	23.9451	24.2593	24.0608	24.2472	332004	14	0.34562	14.325	23.7	23.6322
08/05 04:05:00	20.05	0	22.9975	23.385	23.6024	24.294	24.4385	24.5848	23.4445	23.1624	23.443	23.3855	23.7525	23.4201	23.7617	23.7	24.2118	23.9296	24.2441	24.0439	24.2253	331612	14.05	0.34368	14.275	23.6947	23.6271
08/05 04:10:00	20.1	0	22.9955	23.3823	23.5996	24.2845	24.4349	24.5812	23.4379	23.1557	23.4366	23.3776	23.7444	23.4115	23.7534	23.69	24.1979	23.9152	24.2298	24.0281	24.2064	333123	14.1	0.341767	14.2333	23.6892	23.6226
08/05 04:15:00	20.15	0	22.9934	23.3794	23.5967	24.2749	24.4315	24.5779	23.432	23.1496	23.4307	23.3704	23.7369	23.4034	23.7456	23.6805	24.1845	23.9012	24.2161	24.0127	24.1893	335518	14.15	0.340105	14.2	23.6836	23.6181
08/05 04:20:00	20.2	0	22.9913	23.3764	23.5938	24.2652	24.4284	24.5747	23.4265	23.1439	23.4252	23.3636	23.7297	23.3957	23.7383	23.6714	24.1716	23.8877	24.2029	23.9978	24.1733	338394	14.2	0.338798	14.175	23.678	23.6137
08/05 04:25:00	20.25	0	22.9893	23.3734	23.5908	24.2555	24.4253	24.5717	23.4213	23.1385	23.42	23.3571	23.7228	23.3883	23.7311	23.6626	24.1589	23.8744	24.1899	23.9832	24.1581	341566	14.25	0.337899	14.1583	23.6724	23.6093
08/05 04:30:00	20.3	0	22.9873	23.3704	23.5878	24.2458	24.4224	24.5687	23.4164	23.1333	23.415	23.3508	23.7162	23.3811	23.7241	23.654	24.1465	23.8614	24.1772	23.9688	24.1436	344939	14.3	0.33744	14.15	23.6667	23.605
08/05 04:35:00	20.35	0	22.9852	23.3674	23.5848	24.2362	24.4196	24.5659	23.4116	23.1282	23.4103	23.3447	23.7097	23.374	23.7173	23.6456	24.1343	23.8486	24.1647	23.9549	24.1295	348462	14.35	0.337442	14.15	23.661	23.6008
08/05 04:40:00	20.4	0	22.9832	23.3645	23.5818	24.2267	24.4168	24.563	23.4071	23.1234	23.4058	23.3388	23.7035	23.3673	23.7108	23.6376	24.1224	23.8363	24.1525	23.9413	24.1162	352104	14.4	0.337918	14.1583	23.6553	23.5967
08/05 04:45:00	20.45	0	22.9811	23.3615	23.5788	24.2173	24.414	24.5603	23.4027	23.1188	23.4014	23.3331	23.6975	23.3606	23.7044	23.6296	24.1107	23.8241	24.1405	23.9278	24.1034	355848	14.45	0.338878	14.175	23.6495	23.5926
08/05 04:50:00	20.5	0	22.9791	23.3586	23.5759	24.208	24.4113	24.5575	23.3984	23.1142	23.3972	23.3275	23.6916	23.3541	23.6982	23.6219	24.0991	23.812	24.1287	23.9145	24.091	359681	14.5	0.34033	14.2	23.6438	23.5885
08/05 04:55:00	20.55	12.9202	22.9771	23.3556	23.5729	24.1985	24.4088	24.555	23.4034	23.1368	23.4089	23.3319	23.695	23.3749	23.7082	23.6242	24.0967	23.8271	24.1327	23.9113	24.079	363596	14.8084	0.342281	14.2333	23.638	23.5891
08/05 05:00:00	20.6	15.5117	22.975	23.3528	23.57	24.1893	24.407	24.5533	23.4105	23.1597	23.4222	23.3382	23.7004	23.3958	23.7196	23.6283	24.0964	23.8424	24.1381	23.9099	24.0684	367588	14.9102	0.344737	14.2965	23.6322	23.5901
08/05 05:05:00	20.6417	18.1058	22.973	23.3501	23.5673	24.1803	24.4059	24.5521	23.4169	23.1752	23.4321	23.3436	23.7052	23.4091	23.7275	23.6314	24.0955	23.8503	24.1403	23.9076	24.0582	370551	15.0038	0.347703	14.3724	23.6271	23.5904
08/05 05:10:00	20.6833	20.7024	22.971	23.3473	23.5644	24.1711	24.4049	24.5512	23.4234	23.1866	23.4403	23.349	23.71	23.4184	23.7337	23.6346	24.0948	23.8542	24.1407	23.9054	24.0482	372333	15.0974	0.350947	14.4519	23.6226	23.5902
08/05 05:15:00	20.725	23.3016	22.969	23.3447	23.5618	24.1623	24.404	24.5503	23.4301	23.1956	23.4475	23.3546	23.7151	23.4255	23.739	23.6381	24.0944	23.8559	24.1404	23.9035	24.0385	373571	15.191	0.354215	14.535	23.6181	23.59
08/05 05:20:00	20.7667	25.9033	22.9669	23.3423	23.5593	24.1536	24.4031	24.5494	23.4372	23.2033	23.4544	23.3606	23.7206	23.4313	23.744	23.6419	24.0944	23.8564	24.1399	23.902	24.029	374526	15.2847	0.357386	14.6217	23.6137	23.5898
08/05 05:25:00	20.8083	28.5077	22.9649	23.34	23.557	24.1451	24.4023	24.5486	23.4446	23.2097	23.4611	23.3669	23.7266	23.436	23.7489	23.6463	24.095	23.8558	24.1392	23.901	24.0199	375321	15.3785	0.360397	14.7121	23.6093	23.5898
08/05 05:30:00	20.85	31.1146	22.9629	23.3378	23.5548	24.1367	24.4014	24.5477	23.4525	23.2153	23.4677	23.3737	23.733	23.4399	23.7539	23.651	24.0961	23.8545	24.1387	23.9003	24.0111	376020	15.4723	0.36321	14.8062	23.605	23.5898
08/05 05:35:00	20.8917	37.6117	22.9609	23.3356	23.5526	24.1283	24.4006	24.547	23.4635	23.2302	23.4791	23.3839	23.7427	23.4535	23.7638	23.6592	24.1004	23.8628	24.143	23.9032	24.0025	376659	15.6439	0.3658	14.9039	23.6008	23.5914
08/05 05:40:00	20.9333	44.1242	22.9589	23.3336	23.5504	24.12	24.4002	24.5465	23.4776	23.2538	23.4948	23.3972	23.7556	23.4757	23.7782	23.6707	24.1078	23.8798	24.1519	23.9094	23.9946	377258	15.8158	0.36815	15.0117	23.5967	23.5945
08/05 05:45:00	20.975	50.6521	22.9569	23.3316	23.5485	24.1119	24.4002	24.5466	23.494	23.2827	23.5134	23.4128	23.7708	23.5034	23.7955	23.6846	24.1177	23.9023	24.1638	23.918	23.9876	377830	15.988	0.370246	15.1297	23.5926	23.5986
08/05 05:50:00	21.0167	57.1956	22.955	23.3299	23.5466	24.104	24.4007	24.5472	23.5122	23.3154	23.5341	23.4303	23.7879	23.5349	23.8149	23.7004	24.1296	23.9286	24.1778	23.9287	23.9815	378382	16.1606	0.372078	15.2578	23.5885	23.6035
08/05 05:55:00	21.0583	63.7546	22.953	23.3283	23.545	24.0963	24.4017	24.5483	23.532	23.3508	23.5562	23.4493	23.8067	23.5691	23.8359	23.7179	24.1432	23.9578	24.1934	23.941	23.9762	378920	16.3334	0.373636	15.3962	23.5891	23.6092
08/05 06:00:00	21.1	70.329	22.9511	23.3268	23.5435	24.0888	24.403	24.5498	23.5532	23.3884	23.5795	23.4696	23.827	23.6058	23.8582	23.737	24.1585	23.9895	24.2104	23.9549	23.9717	379447	16.5066	0.374913	15.5233	23.5901	23.6154
08/05 06:05:00	21.15	76.9189	22.9491	23.3256	23.5422	24.0817	24.4049	24.5517	23.5759	23.4279	23.604	23.4914	23.8488	23.6443	23.8816	23.7574	24.1751	24.0231	24.2286	23.9702	23.9685	381102	16.6884	0.375901	15.6563	23.5904	23.6223
08/05 06:10:00	21.2	83.5243	22.9472	23.3245	23.5411	24.0747	24.407	24.554	23.5997	23.4687	23.6294	23.5144	23.8718	23.6844	23.9062	23.7791	24.1931	24.0583	24.2479	23.9868	23.9662	384024	16.8705	0.376781	15.7967	23.5902	23.6296
08/05 06:15:00	21.25	90.1449	22.9453	23.3237	23.5402	24.068	24.4096	24.5566	23.6247	23.5108	23.6555	23.5385	23.896	23.7259	23.9315	23.8019	24.2122	24.095	24.2681	24.0046	23.9648	387557	17.0529	0.377755	15.9445	23.59	23.6374
08/05 06:20:00	21.3	96.7809	22.9434	23.3229	23.5394	24.0615	24.4124	24.5596	23.6505	23.555	23.6824	23.5634	23.9212	23.7696	23.9578	23.8257	24.2324	24.1339	24.2892	24.0234	23.9642	391439	17.2356	0.378921	16.0996	23.5898	23.6456
08/05 06:25:00	21.35	103.432	22.9416	23.3223	23.5388	24.0553	24.4154	24.5628	23.6773	23.5999	23.7098	23.5892	23.9475	23.8143	23.9848	23.8506	24.2537	24.1738	24.3111	24.0433	23.9644	395547	17.4186	0.38033	16.2622	23.5898	23.6543
08/05 06:30:00	21.4	110.098	22.9397	23.3219	23.5383	24.0493	24.4188	24.5663	23.7049	23.6452	23.7377	23.6159	23.9747	23.8596	24.0124	23.8764	24.276	24.2144	24.3337	24.0643	23.9652	399816	17.602	0.382016	16.4322	23.5898	23.6633
08/05 06:35:00	21.45	116.663	22.9379	23.3216	23.538	24.0435	24.4223	24.57	23.7317	23.7042	23.7641	23.6416	24.0013	23.9189	24.0387	23.9015	24.2978	24.2691	24.3551	24.0845	23.9668	404213	17.7833	0.383999	16.6097	23.5914	23.673
08/05 06:40:00	21.5	123.53	22.9361	23.3215	23.5379	24.0379	24.4262	24.5741	23.7588	23.8061	23.7933	23.6675	24.0283	24.0213	24.0678	23.9269	24.32	24.3671	24.3792	24.1051	23.9691	408716	17.9706	0.386295	16.788	23.5945	23.6856
08/05 06:45:00	21.55	130.697	22.9343	23.3216	23.538	24.0327	24.4308	24.5789	23.7856	23.917	23.8214	23.693	24.0551	24.133	24.0961	23.952	24.3422	24.4744	24.4027	24.1255	23.9726	413315	18.1639	0.388916	16.9675	23.5986	23.6988
08/05 06:50:00	21.6	138.161	22.9325	23.322	23.5384	24.0279	24.4359	24.5843	23.8123	24.0281	23.848	23.718	24.0821	24.2449	24.123	23.9769	24.3645	24.582	24.4248	24.1458	23.9772	418000	18.3632	0.391873	17.1489	23.6035	23.7121
08/05 06:55:00	21.65	145.921	22.9308	23.3227	23.539	24.0234	24.4414	24.59	23.839	24.1423	23.8737	23.7429	24.1094	24.3601	24.1492	24.0018	24.3875	24.6931	24.4464	24.1662	23.9825	422769	18.5684	0.395175	17.3324	23.6092	23.7257
08/05 07:00:00	21.7	153.974	22.9291	23.3235	23.5399	24.0193	24.4471	24.5961	23.866	24.2602	23.8988	23.7679	24.1371	24.4796	24.1751	24.027	24.4109	24.8085	24.4677	24.1869	23.9886	427617	18.7795	0.398829	17.5187	23.6154	23.7398
08/05 07:05:00	21.7917	162.316	22.9399	23.3458	23.5618	24.0357	24.4534	24.6027	23.9129	24.4003	23.9432	23.8122	24.1844	24.6215	24.2201	24.0714	24.4536	24.9462	24.5079	24.2267	23.9982	432750	19.038	0.402843	17.7081	23.6223	23.7745
08/05 07:10:00	21.8833	170.944	22.9461	23.3596	23.5751	24.044	24.4613	24.611	23.9525	24.3231	23.9807	23.8489	24.2247	24.5462	24.2585	24.1085	24.4896	24.8674	24.5418	24.2594	24.011	438196	19.3022	0.407147	17.9039	23.6296	23.7891
08/05 07:15:00	21.975	179.855	22.9496	23.3684	23.5837	24.0477	24.4679	24.6179	23.9877	24.2388	24.013	23.8819	24.261	24.4636	24.292	24.1422	24.5217	24.7807	24.5711	24.2888	24.0234	443839	19.5721	0.411661	18.1065	23.6374	23.7989
08/05 07:20:00	22.0667	189.045	22.9514	23.3743	23.5893	24.0487	24.4732	24.6235	24.0206	24.2004	24.042	23.9128	24.2951	24.4303	24.3225	24.1741	24.5518	24.7437	24.5975	24.3166	24.0357	449629	19.8476	0.416351	18.3165	23.6456	23.8089
08/05 07:25:00	22.1583	198.51	22.9521	23.3782	23.5931	24.048	24.4779	24.6287	24.0534	24.1861	24.0703	23.9429	24.3294	24.4219	24.3526	24.2054	24.5823	24.7317	24.6237	24.344	24.0485	455547	20.1285	0.421201	18.5341	23.6543	23.819
08/05 07:30:00	22.25	208.245	22.9522	23.381	23.5958	24.0465	24.4825	24.6337	24.0869	24.1863	24.0985	23.9727	24.3645	24.4282	24.3828	24.2366	24.6135	24.7346	24.6501	24.3715	24.062	461580	20.4149	0.426201	18.7599	23.6633	23.8293
08/05 07:35:00	22.3417	213.32	22.9518	23.383	23.598	24.0445	24.4872	24.6389	24.1219	24.1878	24.1274	24.0031	24.4013	24.4355	24.414	24.2685	24.6467	24.7386	24.6776	24.3998	24.0762	467724	20.6081	0.431348	18.9944	23.673	23.8395
08/05 07:40:00	22.4333	218.233	22.9511	23.3847	23.5997	24.0423	24.4919	24.6441	24.1582	24.1889	24.157	24.034	24.4396	24.4423	24.4461	24.3012	24.6816	24.7422	24.7062	24.429	24.0913	473976	20.798	0.43664	19.2298	23.6856	23.8497
08/05 07:45:00	22.525	222.985	22.9503	23.386	23.6013	24.04	24.4967	24.6495	24.1955	24.1902	24.1872	24.0653	24.4793	24.449	24.4788	24.3345	24.7179	24.7458	24.7356	24.4589	24.1071	480334	20.9847	0.442078	19.4654	23.6988	23.8601
08/05 07:50:00	22.6167	227.577	22.9494	23.3873	23.6028	24.0378	24.5016	24.655	24.2337	24.1917	24.2177	24.0969	24.52	24.4557	24.5122	24.3683	24.7555	24.7496	24.7657	24.4894	24.1237	485129	21.1682	0.447663	19.7004	23.7121	23.8705
08/05 07:55:00	22.7083	232.011	22.9484	23.3884	23.6043	24.0357	24.5066	24.6606	24.2726	24.1935	24.2486	24.1287	24.5616	24.4624	24.546	24.4024	24.7941	24.7535	24.7965	24.5204	24.141	487670	21.3486	0.453257	19.9342	23.7257	23.8811
08/05 08:00:00	22.8	236.289	22.9473	23.3896	23.6057	24.0338	24.5117	24.6663	24.3122	24.1955	24.2797	24.1607	24.6041	24.4691	24.5802	24.437	24.8338	24.7576	24.8277	24.552	24.1591	442148	21.5258	0.458666	20.1659	23.7398	23.8918
08/05 08:05:00	22.8417	240.413	22.9713	23.4331	23.6488	24.0726	24.5167	24.672	24.3877	24.2328	24.3466	24.2277	24.6819	24.51	24.6494	24.5058	24.9082	24.7952	24.8935	24.6175	24.1748	387080	21.6499	0.459877	20.3947	23.7745	23.9421
08/05 08:10:00	22.8833	244.386	22.9865	23.4597	23.6748	24.095	24.5248	24.6809	24.4438	24.2498	24.3938	24.2742	24.7406	24.5307	24.6991	24.5544	24.964	24.8132	24.9402	24.663	24.1925	365448	21.7711	0.456071	20.6124	23.7891	23.9745
08/05 08:15:00	22.925	248.209	22.9963	23.4771	23.6918	24.1088	24.5336	24.6906	24.4856	24.2419	24.4324	24.3125	24.7854	24.5265	24.7407	24.5952	25.0061	24.8066	24.9791	24.701	24.2105	408837	21.8892	0.450009	20.8181	23.7989	23.9966
08/05 08:20:00	22.9667	251.884	23.0029	23.4891	23.7036	24.1176	24.5421	24.6998	24.5239	24.2345	24.4673	24.3475	24.8272	24.523	24.779	24.6332	25.0454	24.8007	25.0149	24.7364	24.2281	463088	22.0044	0.447092	21.0112	23.8089	24.0144
08/05 08:25:00	23.0083	255.416	23.0071	23.4978	23.7123	24.1235	24.5501	24.7086	24.5624	24.2294	24.5006	24.3813	24.8695	24.5219	24.8161	24.6702	25.0854	24.7975	25.0495	24.7709	24.2454	481309	22.1166	0.448213	21.1909	23.819	24.0301
08/05 08:30:00	23.05	258.805	23.0099	23.5045	23.7192	24.1277	24.5578	24.7169	24.6013	24.2264	24.5332	24.4144	24.9124	24.5229	24.8525	24.7067	25.1262	24.7965	25.0838	24.8052	24.2627	488801	22.2261	0.45036	21.3566	23.8293	24.0446
08/05 08:35:00	23.0917	292.242	23.0116	23.5099	23.7249	24.131	24.5653	24.725	24.643	24.2715	24.5621	24.4438	24.9593	24.5727	24.8856	24.7397	25.1715	24.8444	25.1148	24.836	24.2802	490252	22.9365	0.452629	21.5075	23.8395	24.061
08/05 08:40:00	23.1333	327.218	23.0126	23.5146	23.7299	24.1338	24.5732	24.7335	24.6893	24.3536	24.5846	24.4665	25.0118	24.6592	24.9122	24.7661	25.2225	24.9292	25.1395	24.8604	24.2985	490867	23.6777	0.454506	21.7016	23.8497	24.0786
08/05 08:45:00	23.175	363.69	23.0132	23.5187	23.7346	24.1364	24.5816	24.7425	24.7333	24.4422	24.6049	24.4872	25.0627	24.7515	24.9369	24.7908	25.2721	25.02	25.1624	24.8832	24.3177	491141	24.4488	0.455914	21.9416	23.8601	24.0958
08/05 08:50:00	23.2167	401.611	23.0135	23.5225	23.7391	24.1389	24.5899	24.7515	24.7277	24.5519	24.6245	24.5072	25.0582	24.8649	24.9611	24.815	25.2653	25.1318	25.1849	24.9057	24.3372	491194	25.2489	0.456814	22.2302	23.8705	24.1086
08/05 08:55:00	23.2583	440.937	23.0135	23.5259	23.7432	24.1412	24.5974	24.7599	24.6992	24.6598	24.6434	24.5262	25.0303	24.976	24.9848	24.8384	25.2349	25.2416	25.2072	24.9275	24.3562	491103	26.0771	0.45732	22.5703	23.8811	24.1188
08/05 09:00:00	23.3	481.619	23.0134	23.5289	23.7469	24.1434	24.6043	24.7678	24.6995	24.7736	24.6631	24.5457	25.0352	25.093	25.0096	24.8624	25.2384	25.3573	25.2306	24.9501	24.3751	490917	26.9324	0.457606	22.9643	23.8918	24.1324
08/05 09:05:00	23.4917	523.608	23.0132	23.5316	23.7505	24.1455	24.6121	24.7769	24.7188	24.8867	24.6851	24.5671	25.0601	25.2093	25.0369	24.8887	25.2623	25.4725	25.2567	24.9751	24.4042	491237	27.9638	0.46167	23.4149	23.9421	24.148
08/05 09:10:00	23.6833	566.854	23.0129	23.5342	23.754	24.1476	24.6209	24.7872	24.7517	24.9971	24.7076	24.5885	25.099	25.323	25.0648	24.9153	25.2999	25.5852	25.2836	25.0006	24.4396	492074	29.0204	0.47035	23.941	23.9745	24.1649
08/05 09:15:00	23.875	611.306	23.0126	23.5367	23.7575	24.15	24.6307	24.7986	24.7955	25.1019	24.7371	24.6173	25.1485	25.4314	25.1001	24.9494	25.3483	25.6929	25.3179	25.0338	24.4794	447394	30.1011	0.480902	24.5452	23.9966	24.1836
08/05 09:20:00	24.0667	656.911	23.0123	23.5394	23.7611	24.1528	24.6415	24.8111	24.848	25.2055	24.7666	24.6456	25.2065	25.539	25.1352	24.983	25.4056	25.7999	25.3524	25.0667	24.5225	395043	31.2049	0.484115	25.2295	24.0144	24.2031
08/05 09:25:00	24.2583	703.614	23.012	23.5421	23.7648	24.1558	24.6532	24.8244	24.9076	25.3076	24.7943	24.6719	25.2715	25.6455	25.1685	25.0148	25.4699	25.9061	25.3853	25.0979	24.5683	374865	32.3306	0.478444	25.9962	24.0301	24.2231
08/05 09:30:00	24.45	751.361	23.0116	23.545	23.7688	24.1594	24.6655	24.8386	24.9719	25.4003	24.828	24.7047	25.3409	25.743	25.2082	25.0533	25.5388	26.0036	25.4247	25.136	24.6167	367112	33.4772	0.469574	26.8474	24.0446	24.2441
08/05 09:35:00	24.6417	747.794	23.0113	23.548	23.7728	24.1633	24.6784	24.8534	25.03	25.4681	24.8622	24.7379	25.4038	25.8158	25.2483	25.0921	25.6014	26.0766	25.4648	25.1747	24.6672	364402	33.5976	0.459433	27.785	24.061	24.2632
08/05 09:40:00	24.8333	743.34	23.011	23.5511	23.7771	24.1676	24.6913	24.8683	25.0813	25.5107	24.9014	24.7765	25.4597	25.864	25.2936	25.1365	25.6573	26.1251	25.5104	25.2191	24.7199	363818	33.7001	0.448946	28.6734	24.0786	24.2811
08/05 09:45:00	25.025	738.026	23.0107	23.5543	23.7814	24.1722	24.704	24.883	25.1273	25.5357	24.9457	24.8202	25.5103	25.8951	25.3441	25.1861	25.7081	26.1569	25.5613	25.2692	24.7746	364169	33.7855	0.438358	29.5086	24.0958	24.2984
08/05 09:50:00	25.2167	731.879	23.0104	23.5575	23.7858	24.1772	24.7164	24.8974	25.1703	25.5519	24.9864	24.8601	25.5582	25.9181	25.3908	25.2318	25.7564	26.1807	25.6088	25.3154	24.8308	364947	33.8542	0.427777	30.2866	24.1086	24.3145
08/05 09:55:00	25.4083	724.928	23.0101	23.5607	23.7902	24.1824	24.7283	24.9114	25.21	25.5585	25.0289	24.902	25.6028	25.932	25.4395	25.2797	25.8017	26.1958	25.6584	25.364	24.8867	365922	33.9069	0.417257	31.0037	24.1188	24.33
08/05 10:00:00	25.6	717.202	23.0098	23.5639	23.7947	24.1878	24.7398	24.925	25.2465	25.5568	25.0741	24.947	25.6444	25.9383	25.4911	25.3308	25.8442	26.2033	25.7112	25.4161	24.9421	366984	33.944	0.406825	31.6562	24.1324	24.3453
08/05 10:05:00	25.7333	708.731	22.9716	23.5036	23.7371	24.1328	24.7504	24.9379	25.2276	25.4986	25.068	24.9417	25.6329	25.8904	25.4934	25.3332	25.8349	26.158	25.7157	25.4203	24.9932	368166	33.908	0.396497	32.2405	24.148	24.3018
08/05 10:10:00	25.8667	699.547	22.9459	23.4685	23.7049	24.103	24.756	24.9455	25.232	25.4616	25.0903	24.9662	25.6447	25.8638	25.5235	25.3647	25.8488	26.1335	25.748	25.4537	25.0378	369440	33.8576	0.386241	32.7359	24.1649	24.2838
08/05 10:15:00	26	689.678	22.9292	23.4472	23.6863	24.0866	24.7596	24.9513	25.2428	25.4285	25.1274	25.0051	25.6624	25.8405	25.5679	25.4102	25.8685	26.1124	25.7946	25.501	25.0804	370684	33.7936	0.376022	33.139	24.1836	24.2781
08/05 10:20:00	26.1333	679.159	22.9181	23.4339	23.6755	24.0781	24.7627	24.9566	25.2572	25.3982	25.17	25.049	25.6836	25.82	25.6176	25.4603	25.8917	26.0941	25.8463	25.5529	25.123	371910	33.7165	0.369629	33.4467	24.2031	24.2791
08/05 10:25:00	26.2667	668.02	22.9106	23.4255	23.6692	24.0743	24.766	24.9622	25.2726	25.369	25.2142	25.0941	25.7056	25.8004	25.6687	25.5115	25.916	26.0768	25.8998	25.6061	25.1663	373101	33.6271	0.367702	33.656	24.2231	24.2836
08/05 10:30:00	26.4	656.294	22.9055	23.42	23.6657	24.0734	24.7697	24.9683	25.2874	25.3396	25.259	25.1395	25.727	25.7805	25.7203	25.5631	25.9397	26.0594	25.9539	25.6597	25.2105	374256	33.5259	0.367555	33.764	24.2441	24.2899
08/05 10:35:00	26.5333	676.743	22.9019	23.4163	23.6638	24.0744	24.7737	24.9748	25.3119	25.3202	25.296	25.1768	25.7583	25.7707	25.764	25.6062	25.9736	26.0523	26.0001	25.705	25.2556	375380	34.0682	0.36815	33.7681	24.2632	24.2977
08/05 10:40:00	26.6667	697.486	22.8992	23.4137	23.663	24.0767	24.7782	24.9816	25.3443	25.3069	25.3255	25.2059	25.7977	25.7667	25.7999	25.6415	26.0158	26.0512	26.0388	25.7426	25.3019	376476	34.6164	0.369065	33.8073	24.2811	24.3061
08/05 10:45:00	26.8	718.485	22.8972	23.4119	23.6628	24.0799	24.7829	24.9885	25.3819	25.296	25.3492	25.2299	25.8422	25.7647	25.8305	25.6716	26.0632	26.0523	26.0725	25.7754	25.349	377547	35.1697	0.37012	33.8837	24.2984	24.3148
08/05 10:50:00	26.9333	739.699	22.8956	23.4106	23.6631	24.0838	24.7878	24.9954	25.4255	25.2866	25.3633	25.2437	25.8927	25.764	25.8515	25.6919	26.1168	26.0549	26.0967	25.7983	25.397	378595	35.7273	0.371234	33.999	24.3145	24.323
08/05 10:55:00	27.0667	761.09	22.8943	23.4097	23.6636	24.0883	24.7928	25.002	25.472	25.2774	25.3738	25.2543	25.9459	25.7629	25.8692	25.7092	26.1733	26.0571	26.1178	25.8187	25.4456	379622	36.2885	0.372372	34.1551	24.33	24.3311
08/05 11:00:00	27.2	782.618	22.8932	23.409	23.6644	24.0932	24.7977	25.0085	25.5203	25.2643	25.3833	25.2641	26.0009	25.7578	25.8859	25.7256	26.2319	26.0558	26.1382	25.8385	25.495	380628	36.8524	0.373513	34.3536	24.3453	24.3391
08/05 11:05:00	27.2917	804.241	22.8923	23.4084	23.6653	24.0986	24.8024	25.0145	25.5682	25.2465	25.3889	25.2701	26.0554	25.7477	25.8994	25.739	26.2902	26.0496	26.1557	25.8555	25.5425	381622	37.3765	0.37465	34.5959	24.3018	24.3464
08/05 11:10:00	27.3833	825.921	22.8914	23.408	23.6662	24.1043	24.8069	25.0202	25.6132	25.2236	25.3967	25.2787	26.1069	25.7322	25.9154	25.7553	26.3457	26.0383	26.176	25.8758	25.5891	382610	37.9017	0.375772	34.885	24.2838	24.3536
08/05 11:15:00	27.475	847.615	22.8907	23.4076	23.6672	24.1104	24.8112	25.0256	25.6594	25.1964	25.4023	25.2849	26.1598	25.7123	25.9292	25.7692	26.4029	26.0227	26.1943	25.894	25.6356	383592	38.4273	0.376869	35.222	24.2781	24.3603
08/05 11:20:00	27.5667	869.285	22.89	23.4073	23.6683	24.1168	24.8153	25.0308	25.7071	25.1643	25.4046	25.2877	26.2144	25.6871	25.9398	25.7798	26.4619	26.0021	26.2095	25.909	25.6821	384572	38.9524	0.377945	35.6081	24.2791	24.3665
08/05 11:25:00	27.6583	890.888	22.8894	23.4071	23.6694	24.1235	24.8192	25.0356	25.7494	25.1257	25.4084	25.2923	26.2634	25.6552	25.9519	25.7923	26.5156	25.975	26.2267	25.9262	25.7286	385553	39.4761	0.379	36.0444	24.2836	24.372
08/05 11:30:00	27.75	912.385	22.8888	23.4068	23.6705	24.1304	24.8229	25.0401	25.794	25.0825	25.4113	25.2961	26.3151	25.6186	25.9631	25.8039	26.5721	25.9434	26.2431	25.9427	25.7752	386536	39.9977	0.380038	36.5319	24.2899	24.3773
08/05 11:35:00	27.8417	874.076	22.8882	23.4065	23.6715	24.1376	24.8262	25.0444	25.82	25.0317	25.4158	25.3015	26.3476	25.5741	25.9758	25.8172	26.6096	25.9038	26.2612	25.961	25.822	387522	39.3232	0.381061	37.0712	24.2977	24.3806
08/05 11:40:00	27.9333	835.301	22.8877	23.4062	23.6726	24.1451	24.8292	25.0484	25.837	25.0676	25.4193	25.3058	26.3712	25.6265	25.9875	25.8292	26.6386	25.9624	26.2785	25.9785	25.869	388512	38.6394	0.382073	37.5091	24.3061	24.3884
08/05 11:45:00	28.025	796.123	22.8872	23.4059	23.6737	24.153	24.8329	25.0533	25.8422	25.1401	25.4249	25.3121	26.383	25.7074	26.0014	25.8435	26.656	26.0495	26.2984	25.9984	25.9171	389507	37.9475	0.383076	37.8443	24.3148	24.3971
08/05 11:50:00	28.1167	756.603	22.8867	23.4058	23.675	24.1611	24.8371	25.0587	25.8408	25.1775	25.4288	25.3162	26.3885	25.7503	26.0132	25.8552	26.6672	26.0983	26.3162	26.0158	25.9661	390513	37.2487	0.384073	38.0758	24.323	24.4027
08/05 11:55:00	28.2083	716.803	22.8863	23.4058	23.6763	24.1696	24.841	25.0639	25.8314	25.1991	25.4341	25.3218	26.3863	25.7767	26.0264	25.8684	26.6708	26.1309	26.3357	26.0349	26.0149	391536	36.5444	0.385066	38.2026	24.3311	24.407
08/05 12:00:00	28.3	676.785	22.8858	23.4057	23.6775	24.1782	24.8444	25.0685	25.815	25.2154	25.4415	25.3322	26.3772	25.7979	26.0418	25.8866	26.6678	26.1585	26.3575	26.0592	26.0636	392572	35.8357	0.386059	38.2239	24.3391	24.4107
08/05 12:05:00	28.3	636.611	22.9229	23.469	23.7407	24.2471	24.8469	25.0724	25.8423	25.2819	25.5007	25.4009	26.4087	25.8665	26.1056	25.9599	26.7012	26.2321	26.4264	26.1377	26.1064	393338	35.0322	0.387054	38.1392	24.3464	24.4718
08/05 12:10:00	28.3	596.343	22.9464	23.5073	23.7787	24.2917	24.8535	25.0805	25.8375	25.3291	25.542	25.4554	26.4081	25.9168	26.1521	26.02	26.702	26.2884	26.4788	26.2033	26.1502	393822	34.2269	0.38803	37.9439	24.3536	24.5089
08/05 12:15:00	28.3	556.044	22.9618	23.5317	23.803	24.3234	24.8613	25.0895	25.8179	25.3651	25.5728	25.5034	26.3938	25.9566	26.1886	26.074	26.6973	26.3345	26.5215	26.2634	26.1931	394220	33.4209	0.388965	37.6376	24.3603	24.5333
08/05 12:20:00	28.3	515.777	22.9722	23.548	23.8195	24.3477	24.869	25.0983	25.7808	25.4018	25.6042	25.5494	26.3621	25.9976	26.2261	26.1263	26.6734	26.3822	26.5658	26.3219	26.2344	394563	32.6155	0.38985	37.2204	24.3665	24.5506
08/05 12:25:00	28.3	475.602	22.9794	23.5594	23.8314	24.3677	24.8761	25.1065	25.7395	25.4347	25.6326	25.5939	26.3269	26.0348	26.2605	26.177	26.6456	26.4262	26.6071	26.3792	26.273	394904	31.812	0.390683	36.6923	24.372	24.5638
08/05 12:30:00	28.3	435.582	22.9845	23.5677	23.8405	24.3852	24.8826	25.1139	25.6897	25.4774	25.6703	25.6431	26.2835	26.0822	26.3047	26.2322	26.6094	26.4806	26.6585	26.4411	26.3101	395252	31.0116	0.391462	36.0537	24.3773	24.5761
08/05 12:35:00	28.3	422.642	22.9882	23.5742	23.8479	24.4013	24.8885	25.121	25.6473	25.5132	25.7026	25.6856	26.2492	26.1224	26.343	26.2808	26.5825	26.528	26.7011	26.4964	26.3472	395618	30.7528	0.392188	35.3048	24.3806	24.5867
08/05 12:40:00	28.3	409.714	22.9909	23.5794	23.8542	24.4163	24.894	25.1275	25.6118	25.5401	25.7268	25.7221	26.2225	26.1534	26.3727	26.3235	26.563	26.5661	26.7022	26.5458	26.3843	396066	30.4943	0.392863	34.5906	24.3884	24.5956
08/05 12:45:00	28.3	396.811	22.9929	23.5838	23.8597	24.431	24.8987	25.1334	25.5808	25.5614	25.7458	25.7553	26.2	26.179	26.3973	26.3631	26.548	26.5991	26.7023	26.5924	26.4208	396561	30.2362	0.393493	33.9119	24.3971	24.6034
08/05 12:50:00	28.3	383.943	22.9944	23.5875	23.8647	24.4452	24.9028	25.1388	25.553	25.5787	25.7611	25.7866	26.18	26.2008	26.4181	26.4008	26.5356	26.6282	26.7024	26.6372	26.4567	397053	29.9789	0.39408	33.2693	24.4027	24.6103
08/05 12:55:00	28.3	371.123	22.9956	23.5907	23.8693	24.4591	24.9064	25.1436	25.5272	25.5931	25.7736	25.8168	26.1615	26.2198	26.4364	26.4374	26.5247	26.6547	26.7024	26.681	26.4921	397542	29.7225	0.394625	32.6635	24.407	24.6167
08/05 13:00:00	28.3	358.362	22.9966	23.5935	23.8736	24.4729	24.9095	25.148	25.5028	25.6053	25.7839	25.8463	26.1439	26.2368	26.4527	26.4734	26.5156	26.6791	26.7024	26.7018	26.527	398059	29.4672	0.395126	32.095	24.4107	24.6226
08/05 13:05:00	28.2583	345.672	22.9974	23.5961	23.8777	24.4866	24.9126	25.1525	25.5817	25.6198	25.7962	25.8619	26.2563	26.2566	26.4717	26.4956	26.6381	26.7017	26.7025	26.7025	26.5595	397412	29.1718	0.395583	31.5643	24.4718	24.6404
08/05 13:10:00	28.2167	333.064	22.9981	23.5985	23.8816	24.5001	24.9175	25.1591	25.716	25.6316	25.8059	25.8754	26.3957	26.2739	26.488	26.5159	26.7009	26.7024	26.7025	26.7026	26.5921	395690	28.8779	0.395923	31.0759	24.5089	24.6602
08/05 13:15:00	28.175	320.549	22.9988	23.6013	23.8861	24.5144	24.9237	25.1669	25.797	25.6398	25.8118	25.8892	26.4797	26.2876	26.5004	26.5366	26.7027	26.7025	26.7025	26.7026	26.6241	393382	28.586	0.396078	30.6301	24.5333	24.6745
08/05 13:20:00	28.1333	308.139	22.9993	23.6044	23.8908	24.529	24.9298	25.1746	25.8507	25.6456	25.8152	25.9018	26.5354	26.2989	26.5103	26.556	26.7027	26.7025	26.7025	26.7026	26.6543	390532	28.2961	0.396008	30.2272	24.5506	24.6858
08/05 13:25:00	28.0917	295.844	22.9999	23.6075	23.8957	24.5437	24.9353	25.1815	25.8753	25.6584	25.8248	25.9003	26.5612	26.3179	26.5271	26.5607	26.7027	26.7025	26.7026	26.7026	26.6828	387263	28.0085	0.395672	29.8673	24.5638	24.6946
08/05 13:30:00	28.05	283.676	23.0004	23.6106	23.9005	24.5583	24.9398	25.1875	25.889	25.6691	25.8327	25.895	26.5765	26.3342	26.5417	26.5616	26.7027	26.7025	26.7025	26.7025	26.7097	383704	27.7235	0.395036	29.5503	24.5761	24.7018
08/05 13:35:00	28.0083	315.24	23.0009	23.6136	23.9052	24.5727	24.9437	25.1927	25.921	25.6724	25.8339	25.9228	26.6174	26.343	26.5493	26.6016	26.7027	26.7025	26.7025	26.7026	26.7354	380041	28.3131	0.394073	29.2763	24.5867	24.7126
08/05 13:40:00	27.9667	346.237	23.0014	23.6164	23.9097	24.5875	24.9464	25.1969	25.8594	25.6739	25.8331	25.842	26.5543	26.3501	26.5551	26.5238	26.7023	26.7025	26.7025	26.7022	26.7591	375969	28.8914	0.392775	29.073	24.5956	24.7062
08/05 13:45:00	27.925	376.628	23.0019	23.6186	23.9137	24.6011	24.9455	25.1974	25.7871	25.6794	25.8362	25.752	26.474	26.3615	26.565	26.4334	26.7021	26.7024	26.7025	26.6793	26.7798	371607	29.4576	0.391101	28.9394	24.6034	24.6976
08/05 13:50:00	27.8833	406.373	23.0024	23.6199	23.9168	24.6136	24.9425	25.1958	25.7455	25.6797	25.8346	25.7141	26.4377	26.3674	26.5699	26.4038	26.7021	26.7024	26.7024	26.6833	26.7981	367324	30.0108	0.389021	28.8745	24.6103	24.6954
08/05 13:55:00	27.8417	435.434	23.0029	23.6207	23.9194	24.6254	24.9394	25.1943	25.7217	25.6826	25.8355	25.7038	26.4223	26.3763	26.5777	26.4026	26.7021	26.7024	26.7024	26.7015	26.8157	363130	30.5504	0.386544	28.8772	24.6167	24.6969
08/05 14:00:00	27.8	463.774	23.0033	23.6211	23.9216	24.6368	24.9371	25.1937	25.7108	25.6899	25.8407	25.7127	26.42	26.3896	26.5897	26.4204	26.7021	26.7023	26.7023	26.7021	26.8328	359009	31.0755	0.383676	28.9462	24.6226	24.7012
08/05 14:05:00	27.9833	491.355	23.0038	23.6214	23.9238	24.6481	24.9372	25.1956	25.7209	25.7009	25.8498	25.7543	26.4384	26.4067	26.606	26.4707	26.7021	26.7023	26.7023	26.7022	26.864	356314	31.8104	0.380422	29.0802	24.6404	24.7099
08/05 14:10:00	28.1667	518.142	23.0043	23.6216	23.9258	24.6592	24.9393	25.1997	25.7388	25.716	25.8632	25.8088	26.4632	26.4278	26.6265	26.5327	26.7021	26.7023	26.7023	26.7023	26.9028	355087	32.5295	0.376997	29.3001	24.6602	24.7204
08/05 14:15:00	28.35	544.098	23.0047	23.6219	23.9281	24.6704	24.9433	25.2055	25.7606	25.7344	25.88	25.8722	26.491	26.4524	26.6505	26.6026	26.7021	26.7022	26.7023	26.7023	26.9458	354676	33.232	0.373613	29.6044	24.6745	24.7323
08/05 14:20:00	28.5333	569.189	23.0052	23.6225	23.9306	24.6819	24.9486	25.2126	25.7855	25.755	25.8993	25.9447	26.5212	26.479	26.6768	26.6812	26.7021	26.7022	26.7022	26.7024	26.9911	354822	33.9171	0.370388	29.9916	24.6858	24.7455
08/05 14:25:00	28.7167	593.38	23.0056	23.6234	23.9333	24.6937	24.9551	25.2218	25.8125	25.777	25.9201	26.0256	26.5528	26.5067	26.7013	26.7014	26.7021	26.7022	26.7022	26.7024	27.0375	355859	34.5843	0.367412	30.46	24.6946	24.7555
08/05 14:30:00	28.9	616.638	23.006	23.6246	23.9363	24.7056	24.9626	25.2325	25.8413	25.7998	25.942	26.1146	26.5858	26.5352	26.7019	26.7022	26.7022	26.7022	26.7022	26.7025	27.0843	357951	35.2328	0.364795	31.008	24.7018	24.7625
08/05 14:35:00	29.0833	607.594	23.0064	23.6261	23.9397	24.7178	24.9706	25.243	25.861	25.8186	25.9603	26.1908	26.6089	26.5596	26.7019	26.7022	26.7021	26.7022	26.7022	26.7024	27.1312	360315	35.2352	0.362649	31.6337	24.7126	24.7685
08/05 14:40:00	29.2667	598.403	23.0068	23.6278	23.9434	24.73	24.9787	25.2528	25.8735	25.8333	25.9748	26.257	26.6244	26.5798	26.7019	26.7023	26.7021	26.7021	26.7021	26.7024	27.1779	362496	35.2347	0.361005	32.2106	24.7062	24.7737
08/05 14:45:00	29.45	589.069	23.0072	23.6297	23.9471	24.7423	24.9864	25.2618	25.8813	25.8453	25.9868	26.3179	26.6351	26.5974	26.7019	26.7023	26.702	26.7021	26.7021	26.7024	27.2241	364573	35.2314	0.359883	32.7392	24.6976	24.7783
08/05 14:50:00	29.6333	579.593	23.0077	23.6316	23.9509	24.7546	24.9935	25.2701	25.8855	25.8553	25.9967	26.375	26.6421	26.613	26.7019	26.7023	26.702	26.7021	26.7021	26.7024	27.2698	366590	35.2252	0.359296	33.2203	24.6954	24.7825
08/05 14:55:00	29.8167	569.977	23.0081	23.6335	23.9547	24.7669	25.0003	25.2781	25.8909	25.8659	26.0072	26.4371	26.6505	26.6293	26.7019	26.7023	26.702	26.702	26.7021	26.7023	27.3149	368670	35.2162	0.359235	33.6549	24.6969	24.7868
08/05 15:00:00	30	560.224	23.0085	23.6354	23.9583	24.7791	25.0068	25.2856	25.8925	25.8753	26.0165	26.4961	26.6548	26.6442	26.7019	26.7023	26.7019	26.702	26.702	26.7023	27.3597	370769	35.2045	0.359697	34.0437	24.7012	24.7907
08/05 15:05:00	30	550.337	22.9963	23.6162	23.9415	24.7718	25.0121	25.2912	25.8702	25.8629	26.0042	26.5319	26.6371	26.6388	26.7018	26.7022	26.7019	26.7019	26.702	26.7022	27.3933	372189	35.0067	0.360677	34.3878	24.7099	24.777
08/05 15:10:00	30	540.318	22.9881	23.6051	23.9329	24.7723	25.015	25.2947	25.8512	25.8564	25.9971	26.5716	26.623	26.6386	26.7018	26.7022	26.7018	26.7019	26.7019	26.7022	27.4191	373240	34.8064	0.362	34.6541	24.7204	24.7696
08/05 15:15:00	30	530.169	22.9827	23.5986	23.9287	24.777	25.0168	25.2974	25.8326	25.8512	25.9917	26.6118	26.6091	26.6394	26.7017	26.7022	26.7018	26.7019	26.7019	26.7021	27.4407	374300	34.6034	0.363513	34.8439	24.7323	24.7654
08/05 15:20:00	30	519.893	22.9791	23.5948	23.9269	24.7841	25.0181	25.2998	25.8132	25.8459	25.9864	26.6513	26.5943	26.6399	26.7017	26.7021	26.7017	26.7018	26.7018	26.7021	27.4599	375296	34.3979	0.365148	34.9581	24.7455	24.7628
08/05 15:25:00	30	509.494	22.9768	23.5925	23.9266	24.7924	25.0192	25.3019	25.7925	25.84	25.9815	26.6896	26.578	26.6396	26.7017	26.7021	26.7017	26.7018	26.7018	26.7021	27.4777	376215	34.1899	0.366854	34.9982	24.7555	24.761
08/05 15:30:00	30	498.973	22.9752	23.5911	23.9271	24.8015	25.0205	25.3039	25.7701	25.833	25.9752	26.7014	26.56	26.6383	26.7017	26.7021	26.7017	26.7018	26.7018	26.702	27.4948	377086	33.9795	0.36855	34.9653	24.7625	24.7596
08/05 15:35:00	30	491.217	22.9742	23.5902	23.9281	24.8109	25.0218	25.3058	25.7462	25.8233	25.9664	26.7018	26.5403	26.6341	26.7016	26.7021	26.7016	26.7018	26.7017	26.702	27.5114	377941	33.8243	0.370145	34.8609	24.7685	24.7581
08/05 15:40:00	30	483.076	22.9736	23.5896	23.9293	24.8206	25.0229	25.3076	25.7204	25.8108	25.9549	26.7018	26.5187	26.627	26.7016	26.7021	26.7016	26.7017	26.7017	26.702	27.5278	378771	33.6615	0.371614	34.7433	24.7737	24.7565
08/05 15:45:00	30	474.546	22.9733	23.5893	23.9307	24.8303	25.0241	25.3096	25.7166	25.7959	25.941	26.7019	26.5505	26.6175	26.7016	26.702	26.7017	26.7017	26.7017	26.702	27.5436	379665	33.4909	0.37297	34.6122	24.7783	24.7599
08/05 15:50:00	30	465.625	22.9732	23.5892	23.9323	24.8403	25.026	25.3126	25.7755	25.7792	25.9251	26.7019	26.6148	26.606	26.7015	26.702	26.7018	26.7017	26.7017	26.702	27.5596	380641	33.3125	0.374228	34.4672	24.7825	24.7666
08/05 15:55:00	30	456.309	22.9732	23.5895	23.9343	24.8507	25.0286	25.3163	25.8075	25.7608	25.9073	26.7019	26.6497	26.5927	26.7015	26.702	26.7018	26.7017	26.7016	26.7019	27.5763	381567	33.1262	0.375399	34.3078	24.7868	24.7705
08/05 16:00:00	30	446.597	22.9732	23.59	23.9364	24.8614	25.0312	25.3199	25.8238	25.7406	25.8876	26.7019	26.6675	26.5776	26.7015	26.702	26.7018	26.7016	26.7016	26.7019	27.5934	382408	32.9319	0.376473	34.1336	24.7907	24.7728
08/05 16:05:00	29.95	436.486	22.9734	23.5905	23.9387	24.8721	25.0331	25.3228	25.8271	25.7174	25.8649	26.702	26.672	26.5593	26.7015	26.702	26.7018	26.7016	26.7016	26.7019	27.6076	382883	32.6797	0.377443	33.9443	24.777	24.7737
08/05 16:10:00	29.9	425.977	22.9736	23.591	23.9409	24.8828	25.0343	25.325	25.8203	25.6917	25.8399	26.702	26.6665	26.5385	26.7014	26.702	26.7017	26.7016	26.7016	26.7019	27.6202	382972	32.4195	0.378335	33.7503	24.7696	24.7735
08/05 16:15:00	29.85	415.066	22.9738	23.5915	23.9429	24.8934	25.0348	25.3267	25.8058	25.6639	25.8129	26.702	26.6535	26.5154	26.6896	26.702	26.7017	26.7016	26.7016	26.7019	27.6319	382958	32.1513	0.379145	33.5514	24.7654	24.7713
08/05 16:20:00	29.8	403.754	22.974	23.5917	23.9449	24.904	25.0347	25.3279	25.7845	25.6339	25.784	26.702	26.6342	26.4901	26.671	26.702	26.7017	26.7016	26.7015	26.7019	27.6432	382923	31.8751	0.379867	33.3471	24.7628	24.7675
08/05 16:25:00	29.75	392.039	22.9743	23.5919	23.9466	24.9144	25.034	25.3285	25.7626	25.6081	25.7587	26.702	26.6151	26.4691	26.6542	26.702	26.7016	26.7016	26.7015	26.7019	27.654	382820	31.5908	0.380503	33.1369	24.761	24.7641
08/05 16:30:00	29.7	379.922	22.9746	23.5918	23.9483	24.9247	25.0331	25.329	25.7359	25.5796	25.7314	26.702	26.5915	26.445	26.6335	26.7019	26.7016	26.7015	26.7015	26.7019	27.6646	382659	31.2984	0.381053	32.9203	24.7596	24.7596
08/05 16:35:00	29.65	365.603	22.9749	23.5916	23.9497	24.9349	25.0317	25.329	25.7086	25.5517	25.7045	26.702	26.568	26.4213	26.6127	26.7019	26.7016	26.7015	26.7015	26.7019	27.6751	382404	30.9621	0.381517	32.6969	24.7581	24.755
08/05 16:40:00	29.6	351.397	22.9752	23.5913	23.9511	24.9449	25.03	25.3287	25.6832	25.5251	25.6802	26.7019	26.547	26.399	26.5939	26.7019	26.7015	26.7015	26.7015	26.7018	27.6854	382048	30.6279	0.381889	32.4583	24.7565	24.7509
08/05 16:45:00	29.55	337.308	22.9755	23.5908	23.9523	24.9549	25.0281	25.3283	25.6597	25.4992	25.6591	26.7019	26.5279	26.3771	26.5783	26.7019	26.7015	26.7015	26.7015	26.7018	27.6955	381626	30.2962	0.382162	32.2055	24.7599	24.7471
08/05 16:50:00	29.5	323.346	22.9758	23.5902	23.9533	24.9649	25.0262	25.3278	25.6374	25.4738	25.6409	26.7019	26.51	26.3554	26.5654	26.7019	26.7015	26.7015	26.7015	26.7018	27.7053	381157	29.9669	0.382326	31.9393	24.7666	24.7437
08/05 16:55:00	29.45	309.515	22.9761	23.5895	23.9543	24.9748	25.0242	25.3273	25.6156	25.4486	25.6245	26.7019	26.4925	26.3338	26.5542	26.7018	26.7015	26.7015	26.7015	26.7018	27.715	380651	29.6403	0.382369	31.6605	24.7705	24.7404
08/05 17:00:00	29.4	295.823	22.9764	23.5888	23.9553	24.9847	25.0223	25.3269	25.5942	25.4236	25.6085	26.7019	26.4751	26.312	26.5453	26.7018	26.7015	26.7015	26.7015	26.7018	27.7245	380113	29.3165	0.382292	31.37	24.7728	24.7373
08/05 17:05:00	29.2667	282.275	22.964	23.5669	23.9358	24.9755	25.0195	25.3257	25.5536	25.3796	25.5742	26.7018	26.4398	26.2726	26.5186	26.7018	26.7015	26.7014	26.7015	26.7017	27.7293	379365	28.9122	0.382101	31.0687	24.7737	24.7155
08/05 17:10:00	29.1333	268.878	22.9559	23.5533	23.9246	24.9742	25.0152	25.323	25.5202	25.3437	25.5474	26.7018	26.4113	26.2406	26.4988	26.7017	26.7014	26.7014	26.7014	26.7017	27.7298	378587	28.5109	0.381808	30.7548	24.7735	24.7013
08/05 17:15:00	29	255.637	22.9507	23.5443	23.9178	24.9769	25.0103	25.3198	25.49	25.3108	25.5236	26.7017	26.3853	26.2111	26.4815	26.7017	26.7014	26.7014	26.7014	26.7017	27.7281	377888	28.1127	0.381443	30.429	24.7713	24.6908
08/05 17:20:00	28.8667	242.558	22.9473	23.538	23.9136	24.982	25.0053	25.3165	25.4611	25.2793	25.5012	26.7017	26.3602	26.1825	26.4655	26.7017	26.7014	26.7014	26.7014	26.7017	27.7248	377196	27.7178	0.38102	30.0925	24.7675	24.6823
08/05 17:25:00	28.7333	229.647	22.9451	23.5333	23.9109	24.9884	25.0002	25.3133	25.4326	25.2484	25.4799	26.7017	26.3353	26.1542	26.4504	26.7016	26.7014	26.7014	26.7014	26.7016	27.7206	376481	27.3263	0.380543	29.7461	24.7641	24.6749
08/05 17:30:00	28.6	216.909	22.9436	23.5295	23.909	24.9955	24.9952	25.3101	25.4043	25.2177	25.4601	26.7016	26.3101	26.1259	26.4367	26.7016	26.7013	26.7014	26.7014	26.7016	27.7154	375736	26.9382	0.380015	29.3907	24.7596	24.6683
08/05 17:35:00	28.4667	198.499	22.9426	23.5264	23.9077	25.003	24.9899	25.3067	25.3749	25.1861	25.4419	26.7016	26.2837	26.0965	26.4238	26.7016	26.7013	26.7013	26.7014	26.7016	27.7096	374802	26.4367	0.379438	29.0273	24.755	24.6619
08/05 17:40:00	28.3333	180.92	22.9419	23.5236	23.9066	25.0106	24.9843	25.303	25.3404	25.1493	25.4219	26.7015	26.2519	26.0616	26.4096	26.7016	26.7013	26.7013	26.7014	26.7016	27.703	373648	25.9517	0.378804	28.6502	24.7509	24.6548
08/05 17:45:00	28.2	164.177	22.9414	23.5209	23.9057	25.0183	24.9781	25.2988	25.3053	25.1125	25.4021	26.7015	26.2193	26.0264	26.3956	26.7015	26.7013	26.7013	26.7014	26.7015	27.6956	372342	25.4835	0.378104	28.2605	24.7471	24.6476
08/05 17:50:00	28.0667	148.277	22.9411	23.5184	23.9048	25.0258	24.9714	25.2941	25.2708	25.0767	25.3837	26.7014	26.1872	25.9922	26.3827	26.7015	26.7013	26.6997	26.7014	26.7015	27.6869	370915	25.0322	0.377331	27.8595	24.7437	24.6408
08/05 17:55:00	27.9333	133.225	22.9409	23.5158	23.9039	25.0331	24.9643	25.2891	25.2365	25.0417	25.3671	26.7014	26.1552	25.9586	26.3713	26.7015	26.7012	26.686	26.7014	26.7015	27.6771	369414	24.5978	0.376477	27.4482	24.7404	24.634
08/05 18:00:00	27.8	119.025	22.9407	23.5133	23.9029	25.0403	24.9569	25.2839	25.2023	25.0072	25.3526	26.7013	26.1232	25.9254	26.3619	26.7014	26.7012	26.6675	26.7014	26.7015	27.666	367861	24.1805	0.375541	27.028	24.7373	24.6275
08/05 18:05:00	27.6583	105.679	22.928	23.4896	23.8815	25.0283	24.9489	25.2782	25.1505	24.9558	25.323	26.7013	26.0748	25.8765	26.3383	26.7014	26.7011	26.632	26.7013	26.7013	27.6537	368254	23.7719	0.37452	26.6	24.7155	24.6029
08/05 18:10:00	27.5167	93.1911	22.9198	23.4742	23.8684	25.0239	24.9395	25.2711	25.1072	24.914	25.3042	26.6921	26.0344	25.8364	26.3246	26.7014	26.6948	26.6032	26.7013	26.7013	27.6385	368919	23.3805	0.373594	26.1717	24.7013	24.5863
08/05 18:15:00	27.375	81.5618	22.9145	23.4634	23.8597	25.0234	24.9301	25.2635	25.0677	24.8764	25.2908	26.6483	25.9972	25.8001	26.3153	26.7013	26.679	26.5769	26.7013	26.7013	27.6213	368324	23.0062	0.372788	25.7442	24.6908	24.5738
08/05 18:20:00	27.2333	70.7922	22.911	23.4553	23.8536	25.0251	24.9207	25.2559	25.0301	24.8409	25.2722	26.5879	25.9613	25.7653	26.2977	26.7013	26.6587	26.5515	26.7013	26.7013	27.6025	367215	22.6492	0.371991	25.3186	24.6823	24.5624
08/05 18:25:00	27.0917	60.8824	22.9086	23.4489	23.8491	25.028	24.911	25.2483	24.9934	24.8069	25.2521	26.5184	25.9261	25.7318	26.2766	26.7012	26.636	26.5268	26.7013	26.7013	27.5824	365865	22.3093	0.371159	24.8962	24.6749	24.552
08/05 18:30:00	26.95	51.8314	22.9069	23.4438	23.8457	25.0318	24.9011	25.2406	24.9574	24.7738	25.2348	26.443	25.8912	25.6987	26.2575	26.7012	26.6119	26.5019	26.7013	26.7012	27.5607	364408	21.9866	0.370275	24.4782	24.6683	24.5426
08/05 18:35:00	26.8083	44.0132	22.9057	23.4396	23.8432	25.0361	24.8905	25.2329	24.9217	24.7411	25.2193	26.3646	25.8563	25.6659	26.2396	26.7012	26.5867	26.477	26.7013	26.7012	27.5386	362907	21.6886	0.369331	24.0655	24.6619	24.5339
08/05 18:40:00	26.6667	36.8567	22.9047	23.4362	23.8414	25.0409	24.8794	25.2251	24.8863	24.7086	25.2008	26.2772	25.8215	25.633	26.2183	26.7011	26.5608	26.4515	26.7012	26.7012	27.5158	361316	21.4038	0.368339	23.6698	24.6548	24.5254
08/05 18:45:00	26.525	30.3598	22.904	23.4333	23.8401	25.0457	24.868	25.217	24.8509	24.6759	25.1821	26.1822	25.7867	25.5999	26.1981	26.7011	26.5341	26.4253	26.7012	26.7012	27.4923	359619	21.1322	0.367312	23.2909	24.6476	24.5173
08/05 18:50:00	26.3833	24.5199	22.9033	23.4306	23.839	25.0506	24.8563	25.2086	24.8157	24.6429	25.1607	26.0812	25.7518	25.566	26.1764	26.7011	26.5068	26.3982	26.7012	26.7012	27.4677	357849	20.8737	0.366251	22.9282	24.6408	24.5092
08/05 18:55:00	26.2417	19.3336	22.9027	23.4283	23.8379	25.055	24.8445	25.2026	24.7809	24.6093	25.1334	26.1246	25.7166	25.5311	26.1486	26.7013	26.4789	26.3695	26.7012	26.7013	27.4411	357307	20.6283	0.365163	22.5817	24.634	24.5004
08/05 19:00:00	26.1	14.7969	22.9022	23.4272	23.8383	25.0605	24.8338	25.1972	24.7478	24.5752	25.0994	26.1827	25.6834	25.4958	26.1146	26.7013	26.4524	26.3403	26.7012	26.7014	27.4135	357623	20.3959	0.364154	22.2509	24.6275	24.4922
08/05 19:05:00	25.9583	0	22.9016	23.427	23.84	25.0672	24.8236	25.1875	24.7055	24.5287	25.0268	25.9683	25.6409	25.4483	26.0418	26.6733	26.4162	26.2985	26.7011	26.7011	27.3871	355708	19.9583	0.363301	21.9355	24.6029	24.4781
08/05 19:10:00	25.8167	0	22.9011	23.4255	23.8398	25.0716	24.8107	25.1772	24.6649	24.483	24.9433	25.7602	25.5994	25.4009	25.9595	26.5488	26.3807	26.2565	26.6592	26.701	27.3581	353310	19.8167	0.362255	21.6177	24.5863	24.4562
08/05 19:15:00	25.675	0	22.9005	23.422	23.8375	25.0734	24.7961	25.1655	24.6283	24.4414	24.8698	25.5997	25.5624	25.3578	25.8881	26.4382	26.3491	26.2185	26.611	26.701	27.3265	351999	19.675	0.360954	21.3207	24.5738	24.4354
08/05 19:20:00	25.5333	0	22.9	23.4168	23.8336	25.0733	24.7808	25.1532	24.5941	24.4025	24.8053	25.4731	25.5276	25.3175	25.8256	26.3431	26.3193	26.1827	26.5639	26.701	27.293	351088	19.5333	0.359594	21.0431	24.5624	24.4156
08/05 19:25:00	25.3917	0	22.8994	23.4107	23.8287	25.0721	24.7657	25.1407	24.5619	24.366	24.7481	25.3687	25.4946	25.2792	25.7698	26.2605	26.2912	26.149	26.5194	26.6976	27.2583	350360	19.3917	0.35825	20.7835	24.552	24.3968
08/05 19:30:00	25.25	0	22.8988	23.4042	23.8235	25.0701	24.7511	25.1277	24.5311	24.3314	24.6965	25.2792	25.4628	25.2428	25.719	26.1874	26.264	26.1165	26.4777	26.6643	27.2222	349748	19.25	0.356958	20.5404	24.5426	24.379
08/05 19:35:00	25.1083	0	22.8982	23.3975	23.8181	25.0678	24.7371	25.1146	24.5018	24.2986	24.6494	25.2004	25.4323	25.2079	25.6722	26.1212	26.2377	26.0854	26.4385	26.6224	27.185	383516	19.1083	0.355736	20.3123	24.5339	24.3621
08/05 19:40:00	24.9667	0	22.8975	23.391	23.8129	25.0651	24.7238	25.1018	24.4736	24.2673	24.6059	25.1298	25.4026	25.1744	25.6284	26.0606	26.2118	26.0552	26.4012	26.5782	27.1466	422422	18.9667	0.357454	20.0973	24.5254	24.346
08/05 19:45:00	24.825	0	22.8968	23.3847	23.8078	25.0625	24.7111	25.0894	24.4465	24.2374	24.5655	25.0657	25.374	25.1421	25.5871	26.0044	26.1868	26.026	26.366	26.535	27.1073	438489	18.825	0.362546	19.8942	24.5173	24.3307
08/05 19:50:00	24.6833	0	22.8961	23.3786	23.803	25.0597	24.6991	25.0776	24.4203	24.2087	24.5277	25.007	25.3459	25.1107	25.548	25.952	26.1621	25.9977	26.3322	26.4929	27.0672	448484	18.6833	0.369118	19.7019	24.5092	24.3161
08/05 19:55:00	24.5417	0	22.8954	23.3728	23.7984	25.0568	24.6877	25.0662	24.3949	24.1809	24.492	24.9526	25.3186	25.0802	25.5106	25.9024	26.1377	25.9696	26.2996	26.4522	27.0263	454770	18.5417	0.376671	19.5194	24.5004	24.3021
08/05 20:00:00	24.4	0	22.8946	23.3672	23.794	25.0538	24.6767	25.0554	24.3702	24.1541	24.4582	24.9021	25.2917	25.0504	25.4747	25.8556	26.1135	25.9421	26.268	26.4129	26.9845	456890	18.4	0.384793	19.3455	24.4922	24.2887
08/05 20:05:00	24.3583	0	22.8938	23.3619	23.7898	25.0506	24.6668	25.0455	24.3486	24.1307	24.4285	24.8575	25.2677	25.0239	25.4425	25.8134	26.0917	25.9174	26.2395	26.3773	26.9482	458071	18.3583	0.393065	19.1792	24.4781	24.2764
08/05 20:10:00	24.3167	0	22.893	23.3572	23.7861	25.0475	24.6577	25.0364	24.3289	24.1092	24.4015	24.8169	25.2454	24.9991	25.4127	25.7743	26.0712	25.8941	26.213	26.344	26.9141	459380	18.3167	0.401595	19.0458	24.4562	24.2652
08/05 20:15:00	24.275	0	22.8922	23.3526	23.7825	25.0442	24.6493	25.0281	24.3103	24.089	24.3766	24.7796	25.2241	24.9755	25.3845	25.7377	26.0515	25.8716	26.1877	26.3124	26.8809	460706	18.275	0.410435	18.9208	24.4354	24.2545
08/05 20:20:00	24.2333	0	22.8913	23.3481	23.7789	25.0406	24.6416	25.0204	24.2926	24.0697	24.3532	24.7449	25.2037	24.9527	25.3577	25.703	26.0323	25.8498	26.1633	26.2821	26.848	462030	18.2333	0.419494	18.8042	24.4156	24.2442
08/05 20:25:00	24.1917	0	22.8904	23.3437	23.7755	25.0369	24.6343	25.0131	24.2757	24.0513	24.3311	24.7125	25.1838	24.9306	25.332	25.6699	26.0134	25.8285	26.1398	26.2529	26.8151	463345	18.1917	0.428739	18.6958	24.3968	24.2343
08/05 20:30:00	24.15	0	22.8895	23.3395	23.7722	25.0331	24.6275	25.0063	24.2594	24.0336	24.3102	24.6821	25.1645	24.9092	25.3073	25.6383	25.9948	25.8075	26.1168	26.2247	26.782	464648	18.15	0.438154	18.5958	24.379	24.2247
08/05 20:35:00	24.1083	0	22.8886	23.3355	23.769	25.0291	24.6209	24.9997	24.2443	24.0165	24.2903	24.6535	25.1452	24.8883	25.2834	25.6079	25.9758	25.7868	26.0944	26.1973	26.7488	465938	18.1083	0.447729	18.5042	24.3621	24.2154
08/05 20:40:00	24.0667	0	22.8876	23.3316	23.7659	25.025	24.6147	24.9935	24.2295	23.9999	24.2712	24.6265	25.1266	24.8678	25.2603	25.5787	25.9572	25.7664	26.0725	26.1707	26.7154	467216	18.0667	0.454598	18.4208	24.346	24.2064
08/05 20:45:00	24.025	0	22.8867	23.3279	23.7628	25.0208	24.6088	24.9875	24.2149	23.9838	24.253	24.6008	25.1084	24.8478	25.2378	25.5505	25.939	25.7462	26.0509	26.1447	26.6818	468481	18.025	0.458331	18.3458	24.3307	24.1977
08/05 20:50:00	23.9833	0	22.8857	23.3242	23.7599	25.0164	24.603	24.9817	24.2006	23.9682	24.2355	24.5765	25.0906	24.8282	25.2159	25.5232	25.921	25.7262	26.0297	26.1192	26.6479	469732	17.9833	0.46083	18.2792	24.3161	24.1892
08/05 20:55:00	23.9417	0	22.8847	23.3207	23.7571	25.0118	24.5975	24.976	24.1867	23.953	24.2186	24.5532	25.0731	24.8089	25.1946	25.4968	25.9031	25.7064	26.0088	26.0942	26.6138	470971	17.9417	0.462601	18.2208	24.3021	24.1808
08/05 21:00:00	23.9	0	22.8837	23.3173	23.7543	25.0072	24.5921	24.9705	24.173	23.9381	24.2023	24.531	25.0559	24.79	25.1738	25.4711	25.8852	25.6867	25.9881	26.0696	26.5796	472197	17.9	0.463951	18.1708	24.2887	24.1727
08/05 21:05:00	23.9	0	22.8826	23.314	23.7516	25.0023	24.587	24.9654	24.1603	23.9242	24.1872	24.5103	25.0397	24.7721	25.1542	25.4469	25.8682	25.6678	25.9684	26.0463	26.5478	472308	17.9	0.465226	18.1292	24.2764	24.165
08/05 21:10:00	23.9	0	22.8816	23.3105	23.7486	24.9971	24.5823	24.9605	24.1481	23.9109	24.1729	24.4907	25.0241	24.7548	25.1353	25.4236	25.8515	25.6493	25.9492	26.0235	26.517	471204	17.9	0.466413	18.091	24.2652	24.1573
08/05 21:15:00	23.9	0	22.8805	23.3072	23.7458	24.9918	24.5777	24.9559	24.1363	23.898	24.1591	24.4719	25.0089	24.7379	25.1171	25.401	25.8351	25.6311	25.9305	26.0013	26.4868	469546	17.9	0.467398	18.0562	24.2545	24.1499
08/05 21:20:00	23.9	0	22.8794	23.304	23.7431	24.9865	24.5734	24.9514	24.1248	23.8854	24.1458	24.4539	24.994	24.7214	25.0994	25.3791	25.8188	25.613	25.912	25.9794	26.4569	467607	17.9	0.468135	18.025	24.2442	24.1427
08/05 21:25:00	23.9	0	22.8784	23.3009	23.7406	24.9811	24.5692	24.947	24.1135	23.8731	24.133	24.4365	24.9793	24.7051	25.082	25.3577	25.8027	25.5951	25.8937	25.9579	26.4272	465518	17.9	0.468599	17.9972	24.2343	24.1357
08/05 21:30:00	23.9	0	22.8773	23.2979	23.738	24.9756	24.5651	24.9428	24.1025	23.861	24.1205	24.4196	24.9649	24.6891	25.0651	25.3368	25.7866	25.5774	25.8757	25.9366	26.3976	463347	17.9	0.46878	17.9729	24.2247	24.1288
08/05 21:35:00	23.9	0	22.8762	23.295	23.7356	24.97	24.5611	24.9387	24.0917	23.8492	24.1084	24.4033	24.9508	24.6734	25.0484	25.3164	25.7706	25.5597	25.8578	25.9156	26.3681	461132	17.9	0.468672	17.9521	24.2154	24.1221
08/05 21:40:00	23.9	0	22.875	23.2922	23.7331	24.9644	24.5571	24.9346	24.081	23.8376	24.0965	24.3875	24.9368	24.6579	25.0321	25.2964	25.7547	25.5422	25.8401	25.8948	26.3387	458894	17.9	0.468272	17.9347	24.2064	24.1155
08/05 21:45:00	23.9	0	22.8739	23.2894	23.7307	24.9586	24.5533	24.9306	24.0705	23.8262	24.0849	24.3721	24.9229	24.6425	25.0161	25.2767	25.7388	25.5247	25.8225	25.8742	26.3095	456645	17.9	0.467578	17.9208	24.1977	24.1089
08/05 21:50:00	23.9	0	22.8728	23.2867	23.7284	24.9527	24.5495	24.9267	24.0602	23.815	24.0736	24.357	24.9093	24.6274	25.0003	25.2574	25.7229	25.5073	25.805	25.8538	26.2804	454395	17.9	0.466592	17.9104	24.1892	24.1025
08/05 21:55:00	23.9	0	22.8716	23.284	23.726	24.9468	24.5457	24.9228	24.05	23.8039	24.0625	24.3423	24.8958	24.6125	24.9848	25.2384	25.7072	25.49	25.7876	25.8335	26.2514	452147	17.9	0.465314	17.9035	24.1808	24.0961
08/05 22:00:00	23.9	0	22.8705	23.2813	23.7237	24.9407	24.542	24.9189	24.04	23.793	24.0516	24.328	24.8825	24.5978	24.9695	25.2197	25.6914	25.4727	25.7704	25.8133	26.2226	449904	17.9	0.463745	17.9	24.1727	24.0899
08/05 22:05:00	23.7583	0	22.8693	23.2787	23.7214	24.9346	24.5375	24.9143	24.0267	23.7787	24.0375	24.3104	24.866	24.5797	24.9511	25.1978	25.6724	25.4521	25.7499	25.7899	26.1851	446419	17.7583	0.461887	17.9	24.165	24.0827
08/05 22:10:00	23.6167	0	22.8682	23.2761	23.7191	24.9283	24.5325	24.9091	24.0119	23.7629	24.0221	24.2914	24.848	24.5603	24.9312	25.1745	25.6519	25.43	25.728	25.765	26.1436	441602	17.6167	0.45973	17.8882	24.1573	24.075
08/05 22:15:00	23.475	0	22.867	23.2735	23.7168	24.9219	24.527	24.9034	23.9963	23.7464	24.0057	24.2719	24.8292	24.54	24.9106	25.1506	25.6305	25.407	25.7051	25.7393	26.0998	436225	17.475	0.457263	17.8646	24.1499	24.0671
08/05 22:20:00	23.3333	0	22.8658	23.271	23.7146	24.9154	24.5213	24.8972	23.9801	23.7294	23.989	24.2519	24.8099	24.5194	24.8896	25.1263	25.6085	25.3834	25.6818	25.7131	26.0548	430605	17.3333	0.454486	17.8292	24.1427	24.0591
08/05 22:25:00	23.1917	0	22.8646	23.2684	23.7123	24.9086	24.5153	24.8908	23.9637	23.7121	23.972	24.2318	24.7904	24.4984	24.8683	25.1018	25.5861	25.3594	25.6581	25.6865	26.009	424893	17.1917	0.451403	17.7819	24.1357	24.051
08/05 22:30:00	23.05	0	22.8635	23.2658	23.71	24.9017	24.5092	24.8842	23.9464	23.6946	23.955	24.2115	24.7708	24.4773	24.8469	25.0772	25.5639	25.335	25.634	25.6596	25.9627	419165	17.05	0.448017	17.7229	24.1288	24.0429
08/05 22:35:00	22.9083	0	22.8623	23.2633	23.7077	24.8945	24.503	24.8776	23.9291	23.677	23.9377	24.1911	24.7511	24.4561	24.8256	25.0526	25.5411	25.3103	25.6095	25.6324	25.9161	413465	16.9083	0.444336	17.6521	24.1221	24.0347
08/05 22:40:00	22.7667	0	22.8611	23.2607	23.7053	24.8872	24.4967	24.8709	23.9119	23.6592	23.9203	24.1706	24.7312	24.4347	24.8041	25.0278	25.5179	25.2854	25.5847	25.605	25.8692	410932	16.7667	0.440363	17.5694	24.1155	24.0265
08/05 22:45:00	22.625	0	22.8599	23.2581	23.703	24.8796	24.4903	24.8643	23.8948	23.6413	23.9028	24.1502	24.7113	24.4133	24.7825	25.0031	25.4942	25.2603	25.5596	25.5774	25.8221	406332	16.625	0.436366	17.475	24.1089	24.0182
08/05 22:50:00	22.4833	0	22.8586	23.2555	23.7006	24.8719	24.4839	24.8576	23.8776	23.6235	23.8851	24.1296	24.6912	24.3918	24.7607	24.9783	25.4702	25.2349	25.5342	25.5496	25.7748	401140	16.4833	0.432174	17.3688	24.1025	24.0099
08/05 22:55:00	22.3417	0	22.8574	23.2529	23.6982	24.864	24.4774	24.8509	23.8603	23.6054	23.8673	24.1091	24.6709	24.3702	24.7389	24.9536	25.4458	25.2094	25.5085	25.5216	25.7274	395751	16.3417	0.427736	17.2507	24.0961	24.0015
08/05 23:00:00	22.2	0	22.8562	23.2503	23.6958	24.8558	24.471	24.8443	23.8428	23.5873	23.8493	24.0887	24.6505	24.3486	24.7169	24.9288	25.4212	25.1839	25.4826	25.4935	25.6798	390326	16.2	0.423036	17.1208	24.0899	23.9931
08/05 23:05:00	22.2	0	22.855	23.2476	23.6934	24.8476	24.4652	24.8384	23.8285	23.5726	23.8347	24.0713	24.6333	24.3303	24.6982	24.9074	25.3998	25.1612	25.46	25.4686	25.641	385521	16.2	0.418071	16.9792	24.0827	23.9857
08/05 23:10:00	22.2	0	22.8537	23.245	23.6909	24.8391	24.46	24.833	23.8159	23.5595	23.8217	24.0556	24.6177	24.3137	24.6813	24.8875	25.3798	25.14	25.4389	25.445	25.6063	381399	16.2	0.412997	16.8493	24.075	23.9788
08/05 23:15:00	22.2	0	22.8525	23.2423	23.6884	24.8306	24.4553	24.8281	23.8041	23.5472	23.8097	24.0407	24.603	24.2978	24.6653	24.8686	25.3606	25.1195	25.4186	25.4223	25.5738	377599	16.2	0.40798	16.7312	24.0671	23.9722
08/05 23:20:00	22.2	0	22.8512	23.2396	23.6859	24.822	24.4508	24.8236	23.7929	23.5355	23.7983	24.0265	24.5889	24.2826	24.6499	24.8502	25.3418	25.0995	25.3988	25.4	25.5426	373979	16.2	0.403094	16.625	24.0591	23.9657
08/05 23:25:00	22.2	0	22.85	23.237	23.6834	24.8134	24.4465	24.8192	23.7821	23.5242	23.7873	24.0126	24.5751	24.2677	24.6349	24.8322	25.3235	25.0799	25.3794	25.3781	25.5124	370474	16.2	0.398375	16.5306	24.051	23.9593
08/05 23:30:00	22.2	0	22.8487	23.2343	23.6809	24.8047	24.4424	24.8151	23.7717	23.5131	23.7766	23.9991	24.5616	24.2531	24.6202	24.8146	25.3053	25.0605	25.3603	25.3564	25.4829	367047	16.2	0.39384	16.4479	24.0429	23.953
08/05 23:35:00	22.2	0	22.8475	23.2317	23.6785	24.796	24.4385	24.811	23.762	23.5023	23.7662	23.9858	24.5481	24.2387	24.6058	24.7972	25.2868	25.0414	25.3414	25.335	25.454	363683	16.2	0.389497	16.3771	24.0347	23.9468
08/05 23:40:00	22.2	0	22.8462	23.2291	23.676	24.7874	24.4346	24.8071	23.7523	23.4918	23.756	23.9727	24.5349	24.2246	24.5916	24.78	25.2687	25.0224	25.3228	25.3138	25.4256	360369	16.2	0.385349	16.3181	24.0265	23.9407
08/05 23:45:00	22.2	0	22.8449	23.2265	23.6735	24.7787	24.4308	24.8032	23.7427	23.4814	23.746	23.9599	24.5219	24.2107	24.5776	24.7631	25.2509	25.0036	25.3042	25.2928	25.3976	357099	16.2	0.381135	16.2708	24.0182	23.9346
08/05 23:50:00	22.2	0	22.8437	23.2239	23.6711	24.77	24.427	24.7994	23.7331	23.4712	23.7362	23.9472	24.5091	24.1969	24.5639	24.7464	25.2332	24.985	25.2859	25.2719	25.37	353870	16.2	0.377032	16.2354	24.0099	23.9286
08/05 23:55:00	22.2	0	22.8424	23.2214	23.6686	24.7613	24.4233	24.7956	23.7237	23.4611	23.7265	23.9346	24.4965	24.1833	24.5503	24.7299	25.2158	24.9665	25.2677	25.2512	25.3428	350679	16.2	0.373093	16.2118	24.0015	23.9227
08/05 24:00:00	22.2	0	22.8411	23.2188	23.6662	24.7526	24.4196	24.7919	23.7144	23.4511	23.7169	23.9222	24.484	24.1698	24.5368	24.7135	25.1984	24.9481	25.2496	25.2307	25.316	347524	16.2	0.369337	16.2	23.9931	23.9168
08/06 00:05:00	22.0167	0	22.7881	23.1686	23.6162	24.6961	24.4146	24.7868	23.6571	23.3938	23.6592	23.8626	24.4237	24.1091	24.4754	24.6498	25.1332	24.8827	25.1835	25.163	25.2776	343754	16.0167	0.36577	16.2	23.9857	23.8633
08/06 00:10:00	21.8333	0	22.7525	23.1347	23.5829	24.6565	24.4049	24.7768	23.6176	23.355	23.6191	23.8217	24.3815	24.0674	24.4321	24.6054	25.0864	24.8364	25.1358	25.1148	25.2295	339324	15.8333	0.36229	16.1847	23.9788	23.8271
08/06 00:15:00	21.65	0	22.7291	23.1112	23.5601	24.6274	24.3933	24.7647	23.5867	23.3246	23.5877	23.7892	24.348	24.034	24.3974	24.5695	25.0481	24.7982	25.0965	25.075	25.1775	334643	15.65	0.358783	16.1542	23.9722	23.8008
08/06 00:20:00	21.4667	0	22.7132	23.094	23.5435	24.6043	24.3812	24.7523	23.5598	23.298	23.5603	23.7604	24.3184	24.0043	24.3667	24.5373	25.0135	24.7634	25.0609	25.0386	25.1241	329876	15.4667	0.355204	16.1083	23.9657	23.7799
08/06 00:25:00	21.2833	0	22.702	23.0805	23.5306	24.5847	24.3692	24.7401	23.5349	23.2733	23.5349	23.7333	24.2906	23.9763	24.3378	24.5067	24.9805	24.7301	25.027	25.0035	25.0702	325100	15.2833	0.351529	16.0472	23.9593	23.7622
08/06 00:30:00	21.1	0	22.6938	23.0695	23.5199	24.5671	24.3577	24.7284	23.5109	23.2496	23.5106	23.7071	24.2638	23.9494	24.31	24.4768	24.9482	24.6974	24.9939	24.9689	25.016	320355	15.1	0.347747	15.9708	23.953	23.7463
08/06 00:35:00	20.9167	0	22.6874	23.0601	23.5106	24.5507	24.3467	24.7173	23.4875	23.2263	23.4868	23.6813	24.2374	23.9228	24.2826	24.4474	24.9162	24.6649	24.961	24.9345	24.9619	315662	14.9167	0.343856	15.8792	23.9468	23.7315
08/06 00:40:00	20.7333	0	22.6821	23.0517	23.5023	24.5351	24.3361	24.7065	23.4644	23.2033	23.4632	23.6557	24.2114	23.8965	24.2556	24.4181	24.8843	24.6324	24.9283	24.9002	24.9077	311032	14.7333	0.339855	15.7722	23.9407	23.7175
08/06 00:45:00	20.55	0	22.6776	23.044	23.4946	24.5199	24.3259	24.6962	23.4415	23.1804	23.4401	23.6303	24.1855	23.8702	24.2287	24.389	24.8524	24.6	24.8956	24.8659	24.8534	306474	14.55	0.335743	15.65	23.9346	23.7039
08/06 00:50:00	20.3667	0	22.6736	23.0369	23.4874	24.505	24.316	24.6862	23.4187	23.1576	23.4169	23.6051	24.1596	23.844	24.2019	24.36	24.8205	24.5674	24.8629	24.8314	24.7991	301991	14.3667	0.331525	15.5125	23.9286	23.6907
08/06 00:55:00	20.1833	0	22.6699	23.0302	23.4805	24.4902	24.3063	24.6764	23.3961	23.1348	23.3941	23.5799	24.1339	23.8178	24.1753	24.331	24.7885	24.5348	24.8301	24.7969	24.7448	297586	14.1833	0.327201	15.3597	23.9227	23.6777
08/06 01:00:00	20	0	22.6665	23.0237	23.4738	24.4754	24.2969	24.6669	23.3729	23.1122	23.3711	23.5548	24.1085	23.7917	24.1487	24.3021	24.7569	24.5021	24.7972	24.7623	24.6904	293262	14	0.322777	15.1917	23.9168	23.6649
08/06 01:05:00	20	0	22.6633	23.0176	23.4674	24.4607	24.2885	24.6584	23.3549	23.0938	23.3527	23.534	24.0869	23.7697	24.1264	24.2775	24.7287	24.4735	24.7685	24.7318	24.6472	290103	14	0.318255	15.0083	23.8633	23.6536
08/06 01:10:00	20	0	22.6601	23.0116	23.4611	24.4461	24.281	24.6508	23.3389	23.0774	23.3364	23.5153	24.0675	23.7498	24.1062	24.2548	24.7026	24.4468	24.7418	24.7032	24.6093	288178	14	0.313784	14.8403	23.8271	23.643
08/06 01:15:00	20	0	22.6571	23.0058	23.4549	24.4314	24.2741	24.6437	23.3239	23.0621	23.3213	23.4976	24.0493	23.7309	24.0873	24.2333	24.6776	24.4212	24.7162	24.6756	24.5741	286792	14	0.309522	14.6875	23.8008	23.6328
08/06 01:20:00	20	0	22.6542	23.0002	23.4488	24.4169	24.2677	24.6371	23.3098	23.0477	23.307	23.4808	24.0318	23.7128	24.069	24.2125	24.6534	24.3963	24.6914	24.6486	24.5406	285675	14	0.305534	14.55	23.7799	23.623
08/06 01:25:00	20	0	22.6513	22.9947	23.4429	24.4024	24.2616	24.6308	23.2962	23.0337	23.2934	23.4645	24.0149	23.6952	24.0514	24.1922	24.6296	24.3718	24.667	24.6222	24.5083	284715	14	0.301851	14.4278	23.7622	23.6134
08/06 01:30:00	20	0	22.6484	22.9893	23.437	24.388	24.2557	24.6248	23.2831	23.0203	23.2801	23.4487	23.9984	23.678	24.0341	24.1724	24.6063	24.3478	24.6431	24.5962	24.4768	283846	14	0.298485	14.3208	23.7463	23.6039
08/06 01:35:00	20	0	22.6457	22.9841	23.4313	24.3738	24.25	24.6189	23.2703	23.0071	23.2672	23.4332	23.9822	23.6611	24.0173	24.1529	24.5833	24.3241	24.6195	24.5705	24.4459	282705	14	0.295443	14.2292	23.7315	23.5947
08/06 01:40:00	20	0	22.6429	22.9789	23.4256	24.3596	24.2444	24.6131	23.2579	22.9943	23.2547	23.418	23.9663	23.6445	24.0007	24.1337	24.5606	24.3006	24.5962	24.5451	24.4158	281703	14	0.292697	14.1528	23.7175	23.5856
08/06 01:45:00	20	0	22.6402	22.9739	23.42	24.3455	24.239	24.6075	23.2457	22.9818	23.2424	23.4031	23.9507	23.6282	23.9844	24.1148	24.5382	24.2775	24.5732	24.52	24.3861	280782	14	0.290252	14.0917	23.7039	23.5767
08/06 01:50:00	20	0	22.6375	22.969	23.4145	24.3315	24.2337	24.6019	23.2337	22.9695	23.2304	23.3885	23.9353	23.6121	23.9683	24.0961	24.516	24.2546	24.5504	24.4951	24.3569	279903	14	0.288112	14.0458	23.6907	23.5678
08/06 01:55:00	20	0	22.6348	22.9641	23.4091	24.3176	24.2284	24.5964	23.222	22.9574	23.2186	23.3741	23.9201	23.5963	23.9524	24.0777	24.4939	24.2319	24.5278	24.4705	24.3281	279015	14	0.286271	14.0153	23.6777	23.5591
08/06 02:00:00	20	0	22.6322	22.9593	23.4037	24.3037	24.2232	24.591	23.2105	22.9455	23.207	23.3599	23.9052	23.5806	23.9368	24.0595	24.4721	24.2094	24.5054	24.446	24.2997	278136	14	0.284723	14	23.6649	23.5505
08/06 02:05:00	19.95	0	22.6295	22.9546	23.3984	24.2899	24.2178	24.5854	23.198	22.9327	23.1944	23.3447	23.8892	23.564	23.9201	24.0403	24.4493	24.1859	24.482	24.4206	24.2686	277058	13.95	0.283463	14	23.6536	23.5416
08/06 02:10:00	19.9	0	22.6269	22.9499	23.3931	24.2761	24.2123	24.5796	23.1851	22.9196	23.1815	23.3293	23.8728	23.5471	23.9032	24.0208	24.4261	24.162	24.4582	24.3949	24.2363	275999	13.9	0.282376	13.9958	23.643	23.5327
08/06 02:15:00	19.85	0	22.6243	22.9453	23.3878	24.2623	24.2066	24.5737	23.1721	22.9063	23.1684	23.3137	23.8564	23.53	23.886	24.0012	24.4027	24.138	24.4343	24.369	24.2036	274948	13.85	0.281361	13.9875	23.6328	23.5237
08/06 02:20:00	19.8	0	22.6217	22.9407	23.3826	24.2485	24.2009	24.5678	23.159	22.893	23.1552	23.2981	23.8398	23.5129	23.8689	23.9816	24.3793	24.114	24.4103	24.3431	24.1707	273907	13.8	0.280374	13.975	23.623	23.5148
08/06 02:25:00	19.75	0	22.6191	22.9362	23.3774	24.2347	24.1952	24.5618	23.1459	22.8796	23.142	23.2825	23.8233	23.4958	23.8517	23.962	24.3558	24.0899	24.3862	24.3172	24.1377	272874	13.75	0.279393	13.9583	23.6134	23.5059
08/06 02:30:00	19.7	0	22.6166	22.9317	23.3723	24.2209	24.1894	24.5558	23.1329	22.8663	23.1289	23.2669	23.8068	23.4788	23.8346	23.9425	24.3323	24.0658	24.3622	24.2913	24.1047	271841	13.7	0.278406	13.9375	23.6039	23.497
08/06 02:35:00	19.65	0	22.614	22.9272	23.3671	24.2071	24.1837	24.5497	23.1198	22.853	23.1158	23.2513	23.7903	23.4618	23.8175	23.923	24.3088	24.0418	24.3381	24.2654	24.0717	270811	13.65	0.277406	13.9125	23.5947	23.4881
08/06 02:40:00	19.6	0	22.6114	22.9228	23.362	24.1932	24.1779	24.5437	23.1068	22.8398	23.1027	23.2359	23.7739	23.4448	23.8004	23.9036	24.2852	24.0177	24.3141	24.2395	24.0388	269784	13.6	0.276415	13.8833	23.5856	23.4792
08/06 02:45:00	19.55	0	22.6089	22.9184	23.3569	24.1793	24.1721	24.5376	23.0939	22.8266	23.0897	23.2204	23.7575	23.4279	23.7835	23.8842	24.2617	23.9936	24.29	24.2136	24.0059	268760	13.55	0.275422	13.85	23.5767	23.4704
08/06 02:50:00	19.5	0	22.6063	22.914	23.3518	24.1654	24.1663	24.5316	23.0809	22.8134	23.0766	23.205	23.7411	23.411	23.7665	23.8649	24.2382	23.9695	24.266	24.1877	23.9731	267739	13.5	0.27442	13.8125	23.5678	23.4616
08/06 02:55:00	19.45	0	22.6038	22.9096	23.3467	24.1514	24.1605	24.5255	23.068	22.8003	23.0637	23.1896	23.7248	23.3942	23.7496	23.8457	24.2147	23.9455	24.242	24.1619	23.9404	266721	13.45	0.273406	13.7708	23.5591	23.4528
08/06 03:00:00	19.4	0	22.6013	22.9052	23.3417	24.1374	24.1547	24.5194	23.0551	22.7872	23.0507	23.1743	23.7085	23.3774	23.7328	23.8265	24.1911	23.9214	24.2179	24.1361	23.9078	265706	13.4	0.272382	13.725	23.5505	23.4441
08/06 03:05:00	19.3083	0	22.5988	22.9009	23.3366	24.1234	24.1487	24.5131	23.0412	22.7731	23.0368	23.1581	23.6912	23.3596	23.7149	23.8064	24.1666	23.8964	24.1929	24.1092	23.8726	263022	13.3083	0.271346	13.675	23.5416	23.435
08/06 03:10:00	19.2167	0	22.5962	22.8966	23.3316	24.1093	24.1425	24.5067	23.0269	22.7586	23.0224	23.1414	23.6735	23.3415	23.6967	23.7858	24.1416	23.8708	24.1673	24.082	23.8363	260048	13.2167	0.270176	13.6215	23.5327	23.4259
08/06 03:15:00	19.125	0	22.5937	22.8922	23.3265	24.0952	24.1362	24.5001	23.0124	22.7439	23.0078	23.1245	23.6556	23.3231	23.6782	23.7651	24.1163	23.8451	24.1416	24.0545	23.7995	257028	13.125	0.268847	13.5646	23.5237	23.4167
08/06 03:20:00	19.0333	0	22.5912	22.8879	23.3215	24.081	24.1298	24.4934	22.9977	22.7291	22.9931	23.1075	23.6376	23.3047	23.6596	23.7443	24.0908	23.8191	24.1156	24.0269	23.7623	253904	13.0333	0.267353	13.5042	23.5148	23.4074
08/06 03:25:00	18.9417	0	22.5887	22.8836	23.3164	24.0667	24.1234	24.4867	22.983	22.7141	22.9782	23.0904	23.6194	23.2861	23.641	23.7234	24.0652	23.7931	24.0895	23.9991	23.7249	250841	12.9417	0.265687	13.4403	23.5059	23.3981
08/06 03:30:00	18.85	0	22.5862	22.8793	23.3114	24.0524	24.1169	24.4799	22.9681	22.6991	22.9633	23.0732	23.6012	23.2675	23.6222	23.7025	24.0394	23.7669	24.0632	23.9713	23.6875	247823	12.85	0.263851	13.3729	23.497	23.3888
08/06 03:35:00	18.7583	0	22.5837	22.875	23.3063	24.038	24.1104	24.4731	22.9532	22.6841	22.9484	23.0561	23.583	23.2489	23.6035	23.6815	24.0136	23.7406	24.0369	23.9433	23.6499	244848	12.7583	0.261849	13.3021	23.4881	23.3795
08/06 03:40:00	18.6667	0	22.5812	22.8706	23.3013	24.0235	24.1038	24.4662	22.9383	22.669	22.9334	23.0389	23.5647	23.2302	23.5847	23.6605	23.9876	23.7142	24.0105	23.9153	23.6123	241918	12.6667	0.259685	13.2278	23.4792	23.3702
08/06 03:45:00	18.575	0	22.5787	22.8663	23.2962	24.0089	24.0972	24.4594	22.9233	22.6539	22.9183	23.0216	23.5464	23.2115	23.5659	23.6396	23.9616	23.6878	23.984	23.8872	23.5746	239034	12.575	0.257363	13.15	23.4704	23.3608
08/06 03:50:00	18.4833	0	22.5762	22.862	23.2912	23.9943	24.0906	24.4525	22.9083	22.6387	22.9033	23.0044	23.528	23.1927	23.547	23.6186	23.9354	23.6612	23.9574	23.859	23.5369	236197	12.4833	0.254886	13.0687	23.4616	23.3515
08/06 03:55:00	18.3917	0	22.5737	22.8577	23.2861	23.9796	24.084	24.4456	22.8933	22.6236	22.8882	22.9872	23.5096	23.174	23.5282	23.5976	23.9092	23.6346	23.9307	23.8308	23.4992	233409	12.3917	0.252257	12.984	23.4528	23.3421
08/06 04:00:00	18.3	0	22.5712	22.8533	23.281	23.9648	24.0774	24.4386	22.8782	22.6084	22.8731	22.9699	23.4912	23.1552	23.5093	23.5765	23.8829	23.6079	23.904	23.8025	23.4615	230669	12.3	0.249481	12.8958	23.4441	23.3327
08/06 04:05:00	18.2583	0	22.5687	22.849	23.2759	23.95	24.071	24.4319	22.8643	22.5944	22.8593	22.9539	23.4741	23.1377	23.4917	23.5568	23.8578	23.5824	23.8784	23.7754	23.4269	229902	12.2583	0.246562	12.8042	23.435	23.3237
08/06 04:10:00	18.2167	0	22.5662	22.845	23.2712	23.9354	24.0648	24.4254	22.851	22.581	22.8459	22.9384	23.4574	23.1206	23.4746	23.5375	23.8332	23.5574	23.8534	23.7488	23.3937	229278	12.2167	0.243802	12.7167	23.4259	23.3151
08/06 04:15:00	18.175	0	22.5637	22.8409	23.2663	23.9206	24.0587	24.419	22.838	22.5678	22.8329	22.9232	23.4411	23.1039	23.4578	23.5186	23.8088	23.5327	23.8286	23.7224	23.3612	228743	12.175	0.241237	12.6333	23.4167	23.3065
08/06 04:20:00	18.1333	0	22.5612	22.8367	23.2613	23.9057	24.0527	24.4127	22.8252	22.5549	22.8201	22.9082	23.4249	23.0873	23.4412	23.4998	23.7846	23.508	23.8039	23.6962	23.3293	228270	12.1333	0.23888	12.5542	23.4074	23.2979
08/06 04:25:00	18.0917	0	22.5587	22.8324	23.2563	23.8908	24.0467	24.4064	22.8125	22.542	22.8075	22.8933	23.4088	23.0709	23.4248	23.4812	23.7605	23.4836	23.7794	23.6701	23.2977	227839	12.0917	0.236744	12.4792	23.3981	23.2893
08/06 04:30:00	18.05	0	22.5562	22.8282	23.2512	23.8758	24.0408	24.4002	22.8	22.5293	22.7949	22.8786	23.3929	23.0546	23.4084	23.4627	23.7364	23.4591	23.755	23.6441	23.2663	227436	12.05	0.234827	12.4083	23.3888	23.2807
08/06 04:35:00	18.0083	0	22.5537	22.8239	23.2462	23.8608	24.035	24.3939	22.7875	22.5166	22.7824	22.864	23.377	23.0383	23.3922	23.4443	23.7125	23.4348	23.7307	23.6182	23.2352	227053	12.0083	0.233129	12.3417	23.3795	23.2721
08/06 04:40:00	17.9667	0	22.5513	22.8196	23.2411	23.8458	24.0291	24.3877	22.775	22.5041	22.77	22.8494	23.3613	23.0222	23.376	23.426	23.6885	23.4105	23.7064	23.5923	23.2042	226682	11.9667	0.231646	12.2792	23.3702	23.2636
08/06 04:45:00	17.925	0	22.5488	22.8153	23.2361	23.8308	24.0232	24.3815	22.7627	22.4916	22.7577	22.8349	23.3455	23.0061	23.3599	23.4078	23.6647	23.3863	23.6821	23.5666	23.1734	226319	11.925	0.230376	12.2208	23.3608	23.2551
08/06 04:50:00	17.8833	0	22.5463	22.8111	23.231	23.8157	24.0174	24.3753	22.7504	22.4791	22.7454	22.8205	23.3299	22.9901	23.3439	23.3897	23.6408	23.3621	23.6579	23.5408	23.1427	225961	11.8833	0.229316	12.1667	23.3515	23.2466
08/06 04:55:00	17.8417	14.7801	22.5438	22.807	23.2262	23.8007	24.012	24.3696	22.7509	22.6688	22.7699	22.8197	23.3271	23.1765	23.366	23.3851	23.6299	23.5413	23.6726	23.5287	23.1128	225606	12.1373	0.228463	12.1167	23.3421	23.2555
08/06 05:00:00	17.8	19.3389	22.5413	22.8042	23.2226	23.7871	24.0093	24.3668	22.7547	22.9215	22.8161	22.8219	23.3277	23.4239	23.4092	23.3838	23.6223	23.781	23.7081	23.5197	23.0862	225252	12.1868	0.227813	12.0955	23.3327	23.2713
08/06 05:05:00	17.8417	24.4972	22.5388	22.8033	23.221	23.7751	24.0099	24.3673	22.7616	23.1776	22.8635	22.827	23.3312	23.6738	23.4532	23.3851	23.6173	23.9945	23.744	23.5129	23.068	226211	12.3316	0.227362	12.086	23.3237	23.2892
08/06 05:10:00	17.8833	30.2589	22.5363	22.804	23.221	23.7649	24.0126	24.37	22.7707	23.2257	22.9102	22.8343	23.3369	23.7159	23.4965	23.3887	23.6148	24.0003	23.7793	23.5087	23.0542	227251	12.4885	0.227054	12.0921	23.3151	23.2965
08/06 05:15:00	17.925	36.6272	22.5339	22.8049	23.2211	23.7551	24.0153	24.3726	22.7803	23.2311	22.9551	22.8433	23.3431	23.7167	23.5381	23.3939	23.6129	24.0005	23.8129	23.5064	23.041	228344	12.6575	0.226885	12.1148	23.3065	23.3015
08/06 05:20:00	17.9667	43.6048	22.5314	22.8051	23.2205	23.7445	24.0176	24.3747	22.7896	23.2599	23.0027	22.8538	23.349	23.7421	23.5828	23.4007	23.6106	24.0005	23.8495	23.5055	23.0289	229493	12.8388	0.226852	12.155	23.2979	23.3078
08/06 05:25:00	18.0083	51.1938	22.529	22.8046	23.2192	23.7333	24.0199	24.3768	22.7989	23.3037	23.0485	22.8655	23.3551	23.7832	23.6259	23.4087	23.6085	24.0005	23.8847	23.5058	23.0176	230674	13.0322	0.226954	12.2138	23.2893	23.3144
08/06 05:30:00	18.05	59.3957	22.5265	22.8036	23.2173	23.7216	24.0222	24.3789	22.8087	23.3525	23.0872	22.8781	23.3617	23.8299	23.6622	23.4178	23.6071	24.0005	23.9129	23.5073	23.0072	231889	13.2379	0.22719	12.2922	23.2807	23.3204
08/06 05:35:00	18.0917	68.7556	22.5241	22.8021	23.215	23.7095	24.0245	24.3811	22.8223	23.4163	23.1269	22.8946	23.3722	23.8922	23.6998	23.4307	23.6095	24.0006	23.9423	23.5127	22.9973	233136	13.4668	0.227561	12.3912	23.2721	23.3277
08/06 05:40:00	18.1333	78.9379	22.5217	22.8002	23.2124	23.6971	24.027	24.3834	22.8367	23.4868	23.1635	22.9113	23.3835	23.9619	23.7346	23.444	23.6129	24.0006	23.9694	23.5184	22.9883	234407	13.7121	0.228068	12.5127	23.2636	23.3351
08/06 05:45:00	18.175	89.9427	22.5194	22.7981	23.2093	23.6847	24.0297	24.3858	22.8512	23.5612	23.1892	22.9274	23.3949	23.9994	23.7585	23.4566	23.6167	24.0006	23.9857	23.5239	22.9798	235809	13.9739	0.228712	12.6582	23.2551	23.3392
08/06 05:50:00	18.2167	101.77	22.517	22.7958	23.2062	23.6722	24.0324	24.3877	22.8662	23.6392	23.2061	22.9432	23.4069	24.0005	23.7739	23.469	23.621	24.0006	23.9932	23.5291	22.9719	237338	14.2521	0.229503	12.8289	23.2466	23.3404
08/06 05:55:00	18.2583	114.418	22.5147	22.7934	23.203	23.6597	24.0351	24.389	22.8819	23.7206	23.219	22.9588	23.4198	24.0006	23.7858	23.4815	23.6263	24.0007	23.9973	23.5344	22.9642	238954	14.5467	0.230451	13.0263	23.2555	23.3413
08/06 06:00:00	18.3	127.885	22.5124	22.7912	23.2	23.6473	24.0377	24.39	22.8985	23.8049	23.2303	22.9744	23.4337	24.0006	23.7965	23.4941	23.6325	24.0007	24.0002	23.5398	22.9569	240687	14.8577	0.231563	13.2271	23.2713	23.3423
08/06 06:05:00	18.4417	142.168	22.5102	22.789	23.1971	23.6351	24.0408	24.3912	22.9182	23.8942	23.2436	22.9924	23.4508	24.0007	23.8097	23.5092	23.642	24.0007	24.0004	23.5476	22.9564	243088	15.285	0.232849	13.4496	23.2892	23.3441
08/06 06:10:00	18.5833	157.263	22.508	22.7884	23.1957	23.6245	24.0444	24.3926	22.9399	23.987	23.2585	23.0116	23.4701	24.0007	23.8247	23.5257	23.6537	24.0007	24.0005	23.557	22.9593	245526	15.7286	0.234256	13.6958	23.2965	23.3473
08/06 06:15:00	18.725	173.167	22.5058	22.7872	23.1939	23.6136	24.0484	24.3943	22.9628	24.0002	23.2745	23.0313	23.4909	24.0007	23.8414	23.5431	23.6671	24.0007	24.0005	23.5673	22.9644	248044	16.1883	0.235779	13.9658	23.3015	23.3506
08/06 06:20:00	18.8667	189.873	22.5036	22.786	23.1919	23.6027	24.0522	24.3962	22.9871	24.0006	23.2918	23.052	23.513	24.0008	23.8593	23.5615	23.682	24.0008	24.0005	23.5789	22.9712	250606	16.6641	0.23742	14.26	23.3078	23.3542
08/06 06:25:00	19.0083	207.377	22.5015	22.7848	23.19	23.592	24.0559	24.3982	23.0126	24.0007	23.3104	23.0736	23.5364	24.0008	23.8785	23.5811	23.6983	24.0008	24.0005	23.5918	22.9791	253231	17.1559	0.23918	14.5788	23.3144	23.358
08/06 06:30:00	19.15	225.672	22.4994	22.7838	23.1881	23.5814	24.0595	24.4004	23.0392	24.0007	23.33	23.0963	23.561	24.0008	23.8987	23.6019	23.7159	24.0008	24.0005	23.606	22.9883	255901	17.6634	0.24106	14.9224	23.3204	23.3622
08/06 06:35:00	19.2917	240.141	22.4973	22.7828	23.1864	23.5713	24.0631	24.4029	23.0657	24.0008	23.3489	23.119	23.5856	24.0008	23.9183	23.6229	23.7338	24.0008	24.0005	23.6206	22.9983	258558	18.0945	0.243061	15.2912	23.3277	23.3664
08/06 06:40:00	19.4333	254.963	22.4953	22.782	23.1847	23.5613	24.0667	24.4054	23.0924	24.0008	23.3665	23.1419	23.6106	24.0008	23.9365	23.6443	23.752	24.0008	24.0005	23.6356	23.0091	261204	18.5326	0.245179	15.6769	23.3351	23.3707
08/06 06:45:00	19.575	270.132	22.4933	22.7812	23.1832	23.5517	24.0702	24.4079	23.1196	24.0008	23.3829	23.1651	23.6362	24.0008	23.9536	23.6661	23.771	24.0008	24.0005	23.6512	23.0205	263817	18.9776	0.247412	16.0786	23.3392	23.3749
08/06 06:50:00	19.7167	285.641	22.4913	22.7805	23.1817	23.5422	24.0736	24.4105	23.1472	24.0008	23.3978	23.1889	23.6625	24.0008	23.9691	23.6886	23.7907	24.0008	24.0005	23.6675	23.0328	266322	19.4295	0.249746	16.4955	23.3404	23.3792
08/06 06:55:00	19.8583	301.483	22.4894	22.7798	23.1803	23.5329	24.077	24.4131	23.1752	24.0008	23.4112	23.213	23.6893	24.0008	23.9837	23.7117	23.8113	24.0008	24.0005	23.6847	23.0457	268841	19.888	0.252161	16.927	23.3413	23.3835
08/06 07:00:00	20	317.651	22.4874	22.7792	23.179	23.5239	24.0803	24.4157	23.2038	24.0008	23.4243	23.2379	23.7169	24.0008	23.9981	23.7356	23.8326	24.0008	24.0005	23.7027	23.0594	271361	20.353	0.254652	17.3721	23.3423	23.388
08/06 07:05:00	20.0917	334.137	22.8727	23.2305	23.6261	23.9187	24.1039	24.4309	23.6743	24.0007	23.8794	23.7016	23.9983	24.0006	24.0006	23.9979	23.9988	24.0005	24.0006	23.9977	23.2231	278335	20.7744	0.257208	17.8301	23.3441	23.7404
08/06 07:10:00	20.1833	350.933	23.2458	23.664	23.9822	23.9986	24.1587	24.467	23.9979	24.0007	23.9983	23.9973	24.0005	24.0006	24.0007	24.0005	24.0006	24.0005	24.0007	24.0005	23.4202	301631	21.202	0.260146	18.2875	23.3473	23.9878
08/06 07:15:00	20.275	368.03	23.5909	23.9959	24.0003	24.0003	24.2398	24.5061	24.001	24.0013	24.0011	24.0009	24.0011	24.0011	24.0012	24.0011	24.0012	24.0011	24.0012	24.001	23.5768	337378	21.6356	0.264821	18.7436	23.3506	24.0005
08/06 07:20:00	20.3667	385.42	23.772	24.0003	24.0004	24.0005	24.2957	24.5323	24.0011	24.0014	24.0012	24.0011	24.0012	24.0012	24.0013	24.0012	24.0013	24.0012	24.0013	24.0012	23.6537	366270	22.0751	0.272265	19.1976	23.3542	24.0007
08/06 07:25:00	20.4583	403.094	23.8898	24.0004	24.0005	24.0006	24.3372	24.5532	24.0012	24.0013	24.0012	24.0011	24.0013	24.0013	24.0014	24.0013	24.0014	24.0013	24.0014	24.0013	23.7101	383412	22.5202	0.281904	19.6485	23.358	24.0008
08/06 07:30:00	20.55	421.042	23.9678	24.0005	24.0006	24.0007	24.3683	24.5692	24.0013	24.0014	24.0013	24.0012	24.0014	24.0014	24.0014	24.0014	24.0015	24.0014	24.0015	24.0014	23.7558	387023	22.9708	0.292752	20.0955	23.3622	24.0009
08/06 07:35:00	20.6417	419.647	23.9998	24.0006	24.0008	24.0008	24.3918	24.5813	24.0013	24.0014	24.0014	24.0013	24.0015	24.0014	24.0015	24.0014	24.0015	24.0014	24.0015	24.0014	23.7947	389926	23.0346	0.303679	20.5378	23.3664	24.001
08/06 07:40:00	20.7333	416.925	24.0001	24.0007	24.0009	24.001	24.4096	24.5903	24.0014	24.0014	24.0014	24.0014	24.0015	24.0014	24.0015	24.0015	24.0016	24.0014	24.0016	24.0015	23.8292	392257	23.0718	0.314627	20.9495	23.3707	24.0011
08/06 07:45:00	20.825	412.888	24.0002	24.0008	24.001	24.0011	24.4232	24.5971	24.0015	24.0014	24.0015	24.0014	24.0016	24.0014	24.0016	24.0015	24.0016	24.0015	24.0016	24.0015	23.8605	394191	23.0828	0.325548	21.3277	23.3749	24.0011
08/06 07:50:00	20.9167	407.553	24.0002	24.0009	24.0011	24.0011	24.4338	24.6022	24.0016	24.0014	24.0016	24.0015	24.0016	24.0014	24.0016	24.0016	24.0017	24.0015	24.0016	24.0016	23.8894	395865	23.0677	0.336412	21.6698	23.3792	24.0012
08/06 07:55:00	21.0083	400.936	24.0002	24.001	24.0011	24.0012	24.4423	24.6064	24.0016	24.0014	24.0016	24.0015	24.0017	24.0014	24.0016	24.0016	24.0017	24.0014	24.0016	24.0016	23.9163	397293	23.0271	0.347208	21.973	23.3835	24.0013
08/06 08:00:00	21.1	393.057	24.0002	24.0011	24.0012	24.0013	24.4491	24.6096	24.0017	24.0014	24.0016	24.0016	24.0017	24.0014	24.0016	24.0016	24.0017	24.0014	24.0016	24.0016	23.9416	398599	22.9611	0.357912	22.2346	23.388	24.0013
08/06 08:05:00	21.15	383.933	24.0002	24.0011	24.0013	24.0014	24.4546	24.6121	24.0017	24.0014	24.0017	24.0016	24.0017	24.0014	24.0016	24.0016	24.0017	24.0014	24.0017	24.0016	23.965	399994	22.8287	0.368515	22.4519	23.7404	24.0014
08/06 08:10:00	21.2	373.585	24.0003	24.0012	24.0014	24.0014	24.4591	24.6141	24.0017	24.0014	24.0017	24.0016	24.0017	24.0014	24.0017	24.0016	24.0017	24.0014	24.0017	24.0016	23.9871	401406	22.6717	0.378653	22.6231	23.9878	24.0014
08/06 08:15:00	21.25	362.035	24.0003	24.0013	24.0014	24.0015	24.4631	24.6159	24.0018	24.0014	24.0017	24.0017	24.0017	24.0014	24.0017	24.0016	24.0017	24.0014	24.0017	24.0017	24.0084	402818	22.4907	0.386968	22.7456	24.0005	24.0015
08/06 08:20:00	21.3	349.304	24.0003	24.0013	24.0015	24.0015	24.4668	24.6178	24.0018	24.0014	24.0017	24.0017	24.0017	24.0014	24.0017	24.0016	24.0017	24.0014	24.0017	24.0017	24.029	404175	22.2861	0.392421	22.8169	24.0007	24.0015
08/06 08:25:00	21.35	335.418	24.0003	24.0014	24.0015	24.0016	24.47	24.6193	24.0018	24.0014	24.0017	24.0017	24.0017	24.0014	24.0017	24.0016	24.0017	24.0014	24.0017	24.0017	24.0486	405561	22.0584	0.39558	22.8344	24.0008	24.0015
08/06 08:30:00	21.4	320.4	24.0004	24.0014	24.0016	24.0016	24.4727	24.6205	24.0018	24.0013	24.0017	24.0017	24.0017	24.0014	24.0017	24.0016	24.0017	24.0014	24.0016	24.0016	24.0677	406962	21.808	0.397426	22.796	24.0009	24.0016
08/06 08:35:00	21.45	319.942	24.0004	24.0015	24.0016	24.0016	24.4752	24.6216	24.0018	24.0013	24.0017	24.0017	24.0017	24.0014	24.0017	24.0016	24.0017	24.0014	24.0016	24.0017	24.0863	408358	21.8488	0.399087	22.6991	24.001	24.0016
08/06 08:40:00	21.5	319.104	24.0004	24.0015	24.0016	24.0017	24.4775	24.6226	24.0018	24.0014	24.0017	24.0017	24.0017	24.0014	24.0017	24.0016	24.0017	24.0014	24.0016	24.0016	24.1046	409789	21.8821	0.400623	22.6002	24.0011	24.0016
08/06 08:45:00	21.55	317.896	24.0004	24.0016	24.0017	24.0017	24.4796	24.6234	24.0018	24.0014	24.0017	24.0017	24.0017	24.0014	24.0016	24.0016	24.0017	24.0014	24.0016	24.0016	24.1226	411238	21.9079	0.402084	22.5011	24.0011	24.0017
08/06 08:50:00	21.6	316.326	24.0005	24.0016	24.0017	24.0017	24.4817	24.6243	24.0018	24.0014	24.0017	24.0017	24.0017	24.0014	24.0016	24.0016	24.0017	24.0014	24.0016	24.0016	24.1404	412691	21.9265	0.403505	22.4032	24.0012	24.0017
08/06 08:55:00	21.65	314.404	24.0005	24.0016	24.0017	24.0017	24.4837	24.6252	24.0017	24.0014	24.0017	24.0017	24.0017	24.0014	24.0016	24.0016	24.0017	24.0014	24.0016	24.0016	24.1579	414118	21.9381	0.404907	22.3081	24.0013	24.0017
08/06 09:00:00	21.7	312.139	24.0005	24.0017	24.0018	24.0018	24.4858	24.6262	24.0017	24.0014	24.0017	24.0017	24.0017	24.0014	24.0016	24.0016	24.0017	24.0014	24.0016	24.0016	24.1753	415551	21.9428	0.406309	22.2173	24.0013	24.0017
08/06 09:05:00	21.65	309.54	24.0005	24.0017	24.0018	24.0018	24.4878	24.6272	24.0017	24.0014	24.0017	24.0017	24.0017	24.0014	24.0016	24.0016	24.0016	24.0014	24.0016	24.0016	24.1909	416291	21.8408	0.407722	22.1325	24.0014	24.0017
08/06 09:10:00	21.6	306.617	24.0005	24.0017	24.0018	24.0018	24.4897	24.6281	24.0017	24.0014	24.0017	24.0017	24.0016	24.0014	24.0016	24.0016	24.0016	24.0014	24.0016	24.0016	24.2053	416747	21.7323	0.40908	22.0502	24.0014	24.0017
08/06 09:15:00	21.55	303.382	24.0006	24.0017	24.0018	24.0018	24.4915	24.6289	24.0017	24.0014	24.0017	24.0017	24.0016	24.0014	24.0016	24.0016	24.0016	24.0014	24.0016	24.0016	24.2189	417037	21.6176	0.410358	21.9719	24.0015	24.0017
08/06 09:20:00	21.5	299.844	24.0006	24.0018	24.0018	24.0018	24.4924	24.6285	24.0017	24.0016	24.0017	24.0017	24.0016	24.0016	24.0016	24.0016	24.0016	24.0016	24.0016	24.0016	24.2315	417571	21.4969	0.411543	21.8991	24.0015	24.0018
08/06 09:25:00	21.45	296.015	24.0006	24.0018	24.0018	24.0018	24.4944	24.6293	24.0017	24.0017	24.0017	24.0017	24.0016	24.0016	24.0016	24.0016	24.0016	24.0016	24.0016	24.0016	24.2437	417840	21.3703	0.412659	21.8334	24.0015	24.0018
08/06 09:30:00	21.4	291.905	24.0006	24.0018	24.0018	24.0018	24.4971	24.6311	24.0017	24.0016	24.0017	24.0017	24.0016	24.0016	24.0016	24.0016	24.0016	24.0016	24.0016	24.0016	24.2567	417916	21.2381	0.413683	21.776	24.0016	24.0018
08/06 09:35:00	21.35	284.46	24.0006	24.0018	24.0019	24.0018	24.4999	24.633	24.0016	24.0016	24.0017	24.0016	24.0016	24.0016	24.0016	24.0016	24.0016	24.0016	24.0016	24.0016	24.2697	417887	21.0392	0.414596	21.7285	24.0016	24.0018
08/06 09:40:00	21.3	277.008	24.0007	24.0018	24.0019	24.0018	24.5025	24.6346	24.0016	24.0016	24.0016	24.0016	24.0016	24.0015	24.0016	24.0016	24.0016	24.0016	24.0016	24.0016	24.2824	417772	20.8402	0.41539	21.6611	24.0016	24.0018
08/06 09:45:00	21.25	269.549	24.0007	24.0018	24.0019	24.0018	24.5047	24.636	24.0016	24.0016	24.0016	24.0016	24.0015	24.0015	24.0016	24.0015	24.0015	24.0015	24.0016	24.0016	24.2946	417604	20.641	0.416055	21.5742	24.0017	24.0018
08/06 09:50:00	21.2	262.084	24.0007	24.0019	24.0019	24.0019	24.5065	24.6371	24.0016	24.0015	24.0016	24.0016	24.0015	24.0015	24.0015	24.0015	24.0015	24.0015	24.0015	24.0015	24.3064	417397	20.4417	0.416585	21.4686	24.0017	24.0018
08/06 09:55:00	21.15	254.613	24.0007	24.0019	24.0019	24.0019	24.508	24.6379	24.0016	24.0015	24.0016	24.0016	24.0015	24.0015	24.0015	24.0015	24.0015	24.0015	24.0015	24.0015	24.3178	417157	20.2423	0.416978	21.3449	24.0017	24.0018
08/06 10:00:00	21.1	247.135	24.0007	24.0019	24.0019	24.0019	24.5093	24.6386	24.0015	24.0015	24.0016	24.0015	24.0015	24.0015	24.0015	24.0015	24.0015	24.0015	24.0015	24.0015	24.3288	416889	20.0427	0.417231	21.2036	24.0017	24.0018
08/06 10:05:00	20.775	239.651	24.0006	24.0016	24.0016	24.0016	24.5201	24.6515	24.0014	24.0014	24.0014	24.0014	24.0014	24.0014	24.0014	24.0014	24.0014	24.0014	24.0014	24.0014	24.3412	411890	19.568	0.417342	21.0453	24.0017	24.0016
08/06 10:10:00	20.45	232.162	24.0006	24.0016	24.0016	24.0016	24.5239	24.6555	24.0013	24.0013	24.0014	24.0013	24.0013	24.0013	24.0013	24.0013	24.0013	24.0013	24.0013	24.0013	24.3456	408621	19.0932	0.416976	20.8559	24.0017	24.0015
08/06 10:15:00	20.125	224.666	24.0006	24.0016	24.0016	24.0016	24.5239	24.6553	24.0013	24.0013	24.0013	24.0013	24.0013	24.0012	24.0013	24.0013	24.0012	24.0012	24.0012	24.0012	24.3463	405054	18.6183	0.416299	20.6359	24.0017	24.0015
08/06 10:20:00	19.8	217.166	24.0006	24.0016	24.0016	24.0016	24.5225	24.6539	24.0013	24.0012	24.0013	24.0013	24.0012	24.0012	24.0012	24.0012	24.0012	24.0012	24.0012	24.0012	24.3455	401128	18.1433	0.4153	20.386	24.0018	24.0015
08/06 10:25:00	19.475	209.66	24.0006	24.0016	24.0016	24.0015	24.5209	24.6524	24.0012	24.0012	24.0012	24.0012	24.0012	24.0012	24.0012	24.0012	24.0012	24.0012	24.0012	24.0012	24.3444	397016	17.6682	0.41393	20.1065	24.0018	24.0015
08/06 10:30:00	19.15	202.149	24.0006	24.0016	24.0016	24.0015	24.5194	24.6511	24.0012	24.0012	24.0012	24.0012	24.0012	24.0011	24.0012	24.0012	24.0012	24.0011	24.0012	24.0012	24.3431	392772	17.193	0.412194	19.798	24.0018	24.0014
08/06 10:35:00	18.825	205.494	24.0006	24.0016	24.0016	24.0015	24.5179	24.6497	24.0012	24.0012	24.0012	24.0012	24.0012	24.0011	24.0012	24.0012	24.0011	24.0011	24.0012	24.0012	24.3416	388654	16.9349	0.410099	19.4609	24.0018	24.0014
08/06 10:40:00	18.5	208.838	24.0006	24.0016	24.0016	24.0015	24.5166	24.6485	24.0012	24.0012	24.0012	24.0012	24.0012	24.0011	24.0012	24.0012	24.0011	24.0011	24.0011	24.0011	24.3402	384569	16.6768	0.407663	19.1189	24.0018	24.0014
08/06 10:45:00	18.175	212.182	24.0006	24.0016	24.0016	24.0015	24.5157	24.6475	24.0012	24.0012	24.0012	24.0012	24.0011	24.0011	24.0012	24.0012	24.0011	24.0011	24.0011	24.0011	24.339	380452	16.4186	0.404896	18.7719	24.0018	24.0014
08/06 10:50:00	17.85	215.525	24.0006	24.0016	24.0016	24.0015	24.5151	24.6469	24.0012	24.0012	24.0012	24.0012	24.0011	24.0011	24.0012	24.0011	24.0011	24.0011	24.0011	24.0011	24.3379	372853	16.1605	0.4018	18.4201	24.0018	24.0014
08/06 10:55:00	17.525	218.868	24.0006	24.0016	24.0016	24.0015	24.5148	24.6466	24.0012	24.0012	24.0012	24.0012	24.0011	24.0011	24.0011	24.0011	24.0011	24.0011	24.0011	24.0011	24.337	356361	15.9024	0.398088	18.0633	24.0018	24.0014
08/06 11:00:00	17.2	222.21	24.0006	24.0016	24.0016	24.0015	24.5148	24.6463	24.0012	24.0011	24.0012	24.0012	24.0011	24.0011	24.0011	24.0011	24.0011	24.0011	24.0011	24.0011	24.336	340091	15.6442	0.393022	17.7017	24.0018	24.0014
08/06 11:05:00	17.1083	225.551	23.9246	24.0011	24.0011	24.0011	24.5355	24.6721	24.001	24.001	24.001	24.001	24.001	24.001	24.001	24.001	24.001	24.001	24.001	24.001	24.35	324487	15.6194	0.386622	17.3351	24.0016	24.0011
08/06 11:10:00	17.0167	228.891	23.8591	24.001	24.0011	24.0011	24.544	24.6818	24.0009	24.0009	24.0009	24.0009	24.0009	24.0009	24.0009	24.0009	24.0009	24.0009	24.0009	24.0009	24.3531	310718	15.5945	0.379338	17.0061	24.0015	24.001
08/06 11:15:00	16.925	232.23	23.808	24.001	24.0011	24.0011	24.5451	24.6828	24.0009	24.0009	24.0009	24.0009	24.0009	24.0008	24.0009	24.0009	24.0008	24.0008	24.0008	24.0008	24.3511	300335	15.5696	0.37118	16.7145	24.0015	24.001
08/06 11:20:00	16.8333	235.567	23.7675	24.001	24.0011	24.001	24.5435	24.6811	24.0009	24.0009	24.0009	24.0009	24.0008	24.0008	24.0008	24.0008	24.0008	24.0008	24.0008	24.0008	24.3478	293192	15.5447	0.362453	16.4604	24.0015	24.001
08/06 11:25:00	16.7417	238.902	23.737	24.001	24.001	24.001	24.5412	24.6788	24.0008	24.0008	24.0008	24.0008	24.0008	24.0008	24.0008	24.0008	24.0008	24.0007	24.0008	24.0008	24.345	288216	15.5197	0.353458	16.2439	24.0015	24.001
08/06 11:30:00	16.65	242.235	23.7143	24.001	24.001	24.001	24.539	24.6767	24.0008	24.0008	24.0008	24.0008	24.0008	24.0007	24.0008	24.0007	24.0007	24.0007	24.0007	24.0007	24.3427	284649	15.4947	0.344392	16.0648	24.0014	24.0009
08/06 11:35:00	16.5583	254.507	23.6977	24.001	24.001	24.001	24.5371	24.6749	24.0008	24.0008	24.0008	24.0008	24.0007	24.0007	24.0007	24.0007	24.0007	24.0007	24.0007	24.0007	24.3408	282125	15.6485	0.335381	15.9233	24.0014	24.0009
08/06 11:40:00	16.4667	266.775	23.6855	24.001	24.001	24.001	24.5357	24.6735	24.0008	24.0008	24.0008	24.0008	24.0007	24.0007	24.0007	24.0007	24.0007	24.0007	24.0007	24.0007	24.3396	280372	15.8022	0.326504	15.8161	24.0014	24.0009
08/06 11:45:00	16.375	279.041	23.6767	24.001	24.001	24.001	24.5348	24.6725	24.0008	24.0008	24.0008	24.0008	24.0007	24.0007	24.0007	24.0007	24.0007	24.0007	24.0007	24.0007	24.3388	279178	15.9558	0.317821	15.7432	24.0014	24.0009
08/06 11:50:00	16.2833	291.304	23.6703	24.001	24.001	24.001	24.5344	24.672	24.0008	24.0007	24.0008	24.0008	24.0007	24.0007	24.0007	24.0007	24.0007	24.0007	24.0007	24.0007	24.3385	278388	16.1094	0.309381	15.7047	24.0014	24.0009
08/06 11:55:00	16.1917	303.564	23.6658	24.001	24.001	24.001	24.5346	24.6718	24.0008	24.0007	24.0008	24.0008	24.0007	24.0007	24.0007	24.0007	24.0007	24.0007	24.0007	24.0007	24.3385	277887	16.2629	0.301509	15.7004	24.0014	24.0009
08/06 12:00:00	16.1	315.822	23.6627	24.001	24.001	24.001	24.535	24.6718	24.0008	24.0007	24.0008	24.0007	24.0007	24.0007	24.0007	24.0007	24.0007	24.0007	24.0007	24.0007	24.3386	277598	16.4164	0.29497	15.7305	24.0014	24.0009
08/06 12:05:00	16.1917	328.077	23.8568	24.0015	24.0014	24.0014	24.515	24.6459	24.0009	24.0009	24.0009	24.0009	24.0008	24.0008	24.0008	24.0008	24.0008	24.0008	24.0008	24.0008	24.3305	288590	16.7532	0.289762	15.7948	24.0011	24.0012
08/06 12:10:00	16.2833	340.33	23.9991	24.0016	24.0015	24.0014	24.5083	24.6373	24.0009	24.0009	24.0009	24.0009	24.0009	24.0009	24.0009	24.0009	24.0009	24.0009	24.0009	24.0009	24.3359	299409	17.0899	0.286771	15.8893	24.001	24.0013
08/06 12:15:00	16.375	352.58	24.0007	24.0016	24.0015	24.0015	24.5101	24.6381	24.001	24.001	24.001	24.001	24.001	24.001	24.001	24.001	24.001	24.001	24.001	24.001	24.3474	308421	17.4266	0.285828	16.0139	24.001	24.0014
08/06 12:20:00	16.4667	364.828	24.0007	24.0017	24.0016	24.0015	24.5148	24.6417	24.0011	24.0011	24.0011	24.0011	24.0011	24.0011	24.0011	24.0011	24.0011	24.0011	24.0011	24.0011	24.36	314833	17.7632	0.286502	16.1687	24.001	24.0014
08/06 12:25:00	16.5583	377.074	24.0007	24.0017	24.0016	24.0016	24.5212	24.6472	24.001	24.0011	24.0011	24.0011	24.001	24.0011	24.0011	24.0011	24.0011	24.0011	24.0012	24.0012	24.3726	319140	18.0998	0.288306	16.3535	24.001	24.0014
08/06 12:30:00	16.65	389.318	24.0007	24.0017	24.0016	24.0016	24.5262	24.6511	24.001	24.0012	24.0012	24.0012	24.001	24.0012	24.0012	24.0012	24.001	24.0012	24.0012	24.0012	24.3827	321637	18.4364	0.290883	16.5686	24.0009	24.0015
08/06 12:35:00	16.7417	400.055	24.0007	24.0017	24.0016	24.0016	24.5297	24.6535	24.001	24.0012	24.0012	24.0012	24.0011	24.0012	24.0012	24.0012	24.0011	24.0012	24.0012	24.0012	24.391	323250	18.7428	0.293965	16.8137	24.0009	24.0015
08/06 12:40:00	16.8333	410.71	24.0007	24.0017	24.0016	24.0016	24.5332	24.6563	24.0011	24.0012	24.0012	24.0011	24.0011	24.0012	24.0012	24.0011	24.0011	24.0012	24.0012	24.0011	24.3986	323439	19.0475	0.297392	17.0716	24.0009	24.0015
08/06 12:45:00	16.925	421.268	24.0007	24.0017	24.0017	24.0016	24.5353	24.6578	24.0011	24.0012	24.0012	24.0011	24.0011	24.0012	24.0012	24.0011	24.0011	24.0012	24.0012	24.0011	24.4043	322735	19.3504	0.300981	17.342	24.0009	24.0015
08/06 12:50:00	17.0167	431.713	24.0007	24.0018	24.0017	24.0016	24.5362	24.6581	24.0011	24.0012	24.0012	24.0011	24.0011	24.0012	24.0012	24.0011	24.0012	24.0012	24.0012	24.0011	24.4085	321826	19.6509	0.304611	17.6249	24.0009	24.0015
08/06 12:55:00	17.1083	442.032	24.0007	24.0018	24.0017	24.0017	24.5369	24.6582	24.0011	24.0012	24.0013	24.0011	24.0012	24.0012	24.0012	24.0011	24.0012	24.0012	24.0013	24.0011	24.4124	320819	19.949	0.30823	17.92	24.0009	24.0015
08/06 13:00:00	17.2	452.209	24.0007	24.0018	24.0017	24.0017	24.5377	24.6584	24.0012	24.0012	24.0013	24.0011	24.0012	24.0012	24.0012	24.0011	24.0012	24.0012	24.0012	24.0012	24.4161	319693	20.2442	0.311808	18.2272	24.0009	24.0015
08/06 13:05:00	17.25	462.23	24.001	24.0021	24.0019	24.0019	24.5282	24.6461	24.0013	24.0013	24.0014	24.0013	24.0013	24.0013	24.0013	24.0013	24.0013	24.0013	24.0013	24.0013	24.412	319799	20.4946	0.315316	18.5462	24.0012	24.0017
08/06 13:10:00	17.3	472.08	24.0009	24.0021	24.002	24.002	24.5262	24.6432	24.0014	24.0014	24.0014	24.0013	24.0014	24.0014	24.0014	24.0013	24.0014	24.0014	24.0014	24.0014	24.4147	318849	20.7416	0.317917	18.8579	24.0013	24.0018
08/06 13:15:00	17.35	481.746	24.001	24.0021	24.002	24.002	24.528	24.6443	24.0014	24.0014	24.0015	24.0014	24.0014	24.0014	24.0015	24.0014	24.0014	24.0015	24.0015	24.0014	24.4201	315290	20.9849	0.319537	19.1622	24.0014	24.0018
08/06 13:20:00	17.4	491.213	24.001	24.0021	24.002	24.002	24.531	24.6466	24.0015	24.0015	24.0015	24.0014	24.0015	24.0015	24.0015	24.0014	24.0015	24.0015	24.0015	24.0015	24.4259	310335	21.2243	0.320109	19.4588	24.0014	24.0018
08/06 13:25:00	17.45	500.468	24.001	24.0021	24.002	24.002	24.5341	24.6489	24.0015	24.0015	24.0015	24.0015	24.0015	24.0015	24.0015	24.0015	24.0015	24.0015	24.0015	24.0015	24.4314	304489	21.4594	0.319734	19.7472	24.0014	24.0019
08/06 13:30:00	17.5	509.496	24.001	24.0021	24.002	24.002	24.5369	24.6509	24.0015	24.0015	24.0015	24.0015	24.0015	24.0015	24.0015	24.0015	24.0015	24.0015	24.0015	24.0015	24.4364	297972	21.6899	0.318513	20.0272	24.0015	24.0019
08/06 13:35:00	17.55	489.045	24.001	24.0021	24.002	24.002	24.5397	24.6529	24.0015	24.0015	24.0015	24.0015	24.0015	24.0015	24.0015	24.0015	24.0015	24.0015	24.0015	24.0015	24.4413	290885	21.3309	0.316541	20.2983	24.0015	24.0019
08/06 13:40:00	17.6	468.683	24.001	24.0021	24.002	24.0019	24.5423	24.6548	24.0015	24.0014	24.0015	24.0015	24.0014	24.0014	24.0014	24.0014	24.0014	24.0013	24.0013	24.0014	24.4457	283238	20.9737	0.313844	20.514	24.0015	24.0018
08/06 13:45:00	17.65	448.42	24.0011	24.0023	24.0023	24.0022	24.5444	24.6564	24.0018	24.0019	24.0019	24.0018	24.0018	24.0019	24.0019	24.0019	24.0018	24.0018	24.0018	24.0018	24.4497	275897	20.6184	0.310494	20.6745	24.0015	24.0021
08/06 13:50:00	17.7	428.266	24.0013	24.0026	24.0025	24.0025	24.5464	24.6578	24.0021	24.0023	24.0023	24.0022	24.0022	24.0024	24.0023	24.0023	24.0022	24.0023	24.0023	24.0022	24.4535	279368	20.2653	0.306591	20.7801	24.0015	24.0025
08/06 13:55:00	17.75	408.232	24.0014	24.0028	24.0028	24.0027	24.548	24.659	24.0024	24.0026	24.0026	24.0025	24.0025	24.0027	24.0027	24.0026	24.0025	24.0027	24.0026	24.0025	24.457	282182	19.9146	0.303053	20.8313	24.0015	24.0027
08/06 14:00:00	17.8	388.329	24.0015	24.003	24.003	24.003	24.5495	24.6601	24.0026	24.0029	24.0028	24.0027	24.0028	24.003	24.0029	24.0028	24.0027	24.0029	24.0029	24.0028	24.4603	284491	19.5666	0.299833	20.8285	24.0015	24.0029
08/06 14:05:00	17.6583	368.567	24.0016	24.003	24.003	24.003	24.5506	24.6609	24.0026	24.0027	24.0027	24.0026	24.0027	24.0028	24.0028	24.0027	24.0027	24.0028	24.0028	24.0027	24.4607	280158	19.0297	0.2969	20.772	24.0017	24.0029
08/06 14:10:00	17.5167	348.955	24.0016	24.003	24.003	24.0029	24.5506	24.6603	24.0028	24.0026	24.0026	24.0026	24.0028	24.0027	24.0026	24.0026	24.0028	24.0026	24.0026	24.0026	24.4594	276403	18.4958	0.293596	20.6499	24.0018	24.0029
08/06 14:15:00	17.375	329.505	24.0016	24.003	24.003	24.0029	24.5513	24.6605	24.0028	24.0025	24.0025	24.0025	24.0028	24.0025	24.0025	24.0025	24.0028	24.0025	24.0025	24.0025	24.4587	272725	17.9651	0.290059	20.4628	24.0018	24.0029
08/06 14:20:00	17.2333	310.225	24.0017	24.003	24.0029	24.0029	24.5531	24.6619	24.0027	24.0024	24.0024	24.0024	24.0027	24.0024	24.0025	24.0024	24.0027	24.0024	24.0024	24.0024	24.4588	268674	17.4378	0.286512	20.2111	24.0018	24.0028
08/06 14:25:00	17.0917	291.125	24.0017	24.003	24.0029	24.0029	24.5538	24.662	24.0026	24.0024	24.0024	24.0027	24.0026	24.0024	24.0024	24.0026	24.0026	24.0024	24.0024	24.0026	24.458	265083	16.9142	0.28304	19.8956	24.0019	24.0028
08/06 14:30:00	16.95	272.216	24.0017	24.003	24.0029	24.0029	24.5551	24.6627	24.0025	24.0023	24.0023	24.0027	24.0025	24.0023	24.0023	24.0027	24.0025	24.0023	24.0023	24.0026	24.4578	261443	16.3943	0.279756	19.5168	24.0019	24.0028
08/06 14:35:00	16.8083	271.04	24.0017	24.003	24.0029	24.0029	24.5565	24.6637	24.0025	24.0023	24.0023	24.0027	24.0024	24.0023	24.0023	24.0026	24.0024	24.0023	24.0023	24.0026	24.4577	257737	16.2291	0.276712	19.0755	24.0019	24.0028
08/06 14:40:00	16.6667	269.93	24.0018	24.003	24.0029	24.0029	24.5577	24.6645	24.0024	24.0023	24.0023	24.0026	24.0024	24.0023	24.0023	24.0025	24.0024	24.0022	24.0023	24.0025	24.4576	254096	16.0653	0.27395	18.6504	24.0018	24.0027
08/06 14:45:00	16.525	268.889	24.0018	24.0029	24.0029	24.0029	24.5589	24.6652	24.0024	24.0023	24.0023	24.0026	24.0024	24.0022	24.0023	24.0025	24.0024	24.0022	24.0023	24.0025	24.4574	250500	15.9028	0.271521	18.2414	24.0021	24.0027
08/06 14:50:00	16.3833	267.92	24.0018	24.0029	24.0029	24.0029	24.5601	24.6658	24.0024	24.0022	24.0023	24.0025	24.0023	24.0022	24.0022	24.0024	24.0023	24.0022	24.0022	24.0024	24.4573	246959	15.7417	0.269405	17.8484	24.0025	24.0027
08/06 14:55:00	16.2417	267.026	24.0018	24.0029	24.0029	24.0029	24.5612	24.6665	24.0024	24.0022	24.0023	24.0025	24.0023	24.0022	24.0022	24.0024	24.0023	24.0022	24.0022	24.0024	24.4571	243469	15.5822	0.266704	17.4714	24.0027	24.0027
08/06 15:00:00	16.1	266.211	24.0018	24.0029	24.0029	24.0028	24.5623	24.6671	24.0023	24.0022	24.0023	24.0024	24.0023	24.0022	24.0022	24.0024	24.0023	24.0022	24.0022	24.0024	24.4569	240027	15.4242	0.263478	17.1104	24.0029	24.0027
08/06 15:05:00	16.0583	265.478	24.0018	24.0029	24.0028	24.0028	24.5636	24.6681	24.0023	24.0022	24.0022	24.0023	24.0022	24.0022	24.0022	24.0022	24.0022	24.0022	24.0022	24.0022	24.4582	238592	15.3679	0.259773	16.7652	24.0029	24.0026
08/06 15:10:00	16.0167	264.829	24.0019	24.0029	24.0028	24.0028	24.5648	24.6688	24.0022	24.0022	24.0022	24.0022	24.0022	24.0021	24.0022	24.0022	24.0022	24.0021	24.0021	24.0022	24.4598	237653	15.3132	0.256309	16.46	24.0029	24.0026
08/06 15:15:00	15.975	264.267	24.0019	24.0029	24.0028	24.0028	24.5659	24.6694	24.0022	24.0021	24.0022	24.0022	24.0021	24.0021	24.0021	24.0021	24.0021	24.0021	24.0021	24.0021	24.4613	236791	15.2603	0.25308	16.1948	24.0029	24.0026
08/06 15:20:00	15.9333	263.795	24.0019	24.0029	24.0028	24.0027	24.5669	24.6701	24.0022	24.0021	24.0021	24.0021	24.0021	24.0021	24.0021	24.0021	24.0021	24.0021	24.0021	24.0021	24.4629	235984	15.2092	0.250085	15.9694	24.0028	24.0026
08/06 15:25:00	15.8917	263.416	24.0019	24.0028	24.0028	24.0027	24.5681	24.6708	24.0021	24.0021	24.0021	24.0021	24.0021	24.002	24.0021	24.0021	24.0021	24.002	24.0021	24.0021	24.4645	235218	15.16	0.247361	15.7837	24.0028	24.0025
08/06 15:30:00	15.85	263.133	24.0019	24.0028	24.0027	24.0027	24.5692	24.6715	24.0021	24.0021	24.0021	24.0021	24.0021	24.002	24.0021	24.002	24.0021	24.002	24.0021	24.002	24.466	234481	15.1127	0.244873	15.6375	24.0028	24.0025
08/06 15:35:00	15.8083	253.821	24.0019	24.0028	24.0027	24.0027	24.5706	24.6725	24.0021	24.002	24.0021	24.0021	24.002	24.002	24.002	24.002	24.002	24.002	24.002	24.002	24.4675	233647	14.8847	0.242626	15.5307	24.0028	24.0025
08/06 15:40:00	15.7667	244.507	24.0019	24.0028	24.0027	24.0027	24.572	24.6736	24.0021	24.002	24.002	24.002	24.002	24.002	24.002	24.002	24.002	24.002	24.002	24.002	24.4687	232727	14.6568	0.240618	15.4187	24.0027	24.0025
08/06 15:45:00	15.725	235.193	24.0019	24.0028	24.0027	24.0027	24.5732	24.6745	24.002	24.002	24.002	24.002	24.002	24.002	24.002	24.002	24.002	24.002	24.002	24.002	24.4695	231752	14.4289	0.238837	15.3013	24.0027	24.0025
08/06 15:50:00	15.6833	225.878	24.0019	24.0028	24.0027	24.0027	24.5743	24.6753	24.002	24.002	24.002	24.002	24.002	24.002	24.002	24.002	24.002	24.002	24.002	24.002	24.4698	230730	14.2009	0.237275	15.1785	24.0027	24.0025
08/06 15:55:00	15.6417	216.562	24.0019	24.0028	24.0027	24.0027	24.5751	24.6759	24.002	24.002	24.002	24.002	24.002	24.0019	24.002	24.0019	24.002	24.0019	24.002	24.0019	24.4696	229669	13.9729	0.235923	15.0501	24.0027	24.0025
08/06 16:00:00	15.6	207.245	24.0019	24.0028	24.0027	24.0026	24.5758	24.6764	24.002	24.0019	24.002	24.0019	24.0019	24.0019	24.0019	24.0019	24.0019	24.0019	24.0019	24.0019	24.4689	228571	13.7449	0.234773	14.916	24.0027	24.0024
08/06 16:05:00	15.6417	197.927	24.0018	24.0027	24.0026	24.0025	24.5765	24.6769	24.0018	24.0018	24.0018	24.0018	24.0018	24.0018	24.0018	24.0018	24.0018	24.0018	24.0018	24.0018	24.469	228486	13.6002	0.233818	14.776	24.0026	24.0023
08/06 16:10:00	15.6833	188.608	24.0018	24.0026	24.0025	24.0025	24.5773	24.6775	24.0017	24.0017	24.0017	24.0017	24.0017	24.0017	24.0017	24.0016	24.0017	24.0017	24.0017	24.0016	24.4691	228495	13.4555	0.232976	14.6287	24.0026	24.0022
08/06 16:15:00	15.725	179.289	24.0018	24.0025	24.0024	24.0024	24.5779	24.678	24.0016	24.0016	24.0016	24.0016	24.0016	24.0016	24.0016	24.0015	24.0016	24.0016	24.0016	24.0015	24.469	228639	13.3108	0.232212	14.4739	24.0026	24.0021
08/06 16:20:00	15.7667	169.969	24.0017	24.0024	24.0023	24.0023	24.5785	24.6784	24.0016	24.0015	24.0016	24.0015	24.0015	24.0015	24.0015	24.0015	24.0015	24.0015	24.0015	24.0015	24.4685	228857	13.166	0.231533	14.3115	24.0026	24.0021
08/06 16:25:00	15.8083	160.648	24.0017	24.0024	24.0022	24.0022	24.579	24.6788	24.0015	24.0015	24.0015	24.0014	24.0015	24.0014	24.0015	24.0014	24.0015	24.0014	24.0015	24.0014	24.4678	229127	13.0213	0.230939	14.1412	24.0025	24.002
08/06 16:30:00	15.85	151.327	24.0017	24.0023	24.0022	24.0021	24.5795	24.6792	24.0015	24.0014	24.0015	24.0014	24.0014	24.0014	24.0014	24.0014	24.0014	24.0014	24.0014	24.0014	24.4667	229429	12.8765	0.230432	13.963	24.0025	24.0019
08/06 16:35:00	15.8917	155.796	24.0016	24.0022	24.0021	24.0021	24.5795	24.6791	24.0014	24.0014	24.0014	24.0014	24.0014	24.0014	24.0014	24.0014	24.0014	24.0013	24.0014	24.0014	24.465	229963	13.0076	0.230011	13.7766	24.0025	24.0019
08/06 16:40:00	15.9333	159.747	24.0016	24.0022	24.0021	24.002	24.5792	24.6785	24.0014	24.0014	24.0014	24.0014	24.0014	24.0013	24.0014	24.0014	24.0014	24.0013	24.0014	24.0014	24.463	230768	13.1283	0.229704	13.6202	24.0025	24.0018
08/06 16:45:00	15.975	163.173	24.0016	24.0021	24.002	24.002	24.5792	24.6781	24.0014	24.0014	24.0014	24.0015	24.0013	24.0013	24.0013	24.0014	24.0013	24.0013	24.0013	24.0014	24.4611	231677	13.2385	0.22954	13.4928	24.0025	24.0018
08/06 16:50:00	16.0167	166.068	24.0015	24.0021	24.002	24.0019	24.5795	24.6781	24.0014	24.0013	24.0014	24.0015	24.0013	24.0013	24.0013	24.0014	24.0013	24.0013	24.0013	24.0014	24.4594	232664	13.338	0.229534	13.3936	24.0025	24.0018
08/06 16:55:00	16.0583	168.428	24.0015	24.0021	24.0019	24.0019	24.5812	24.6797	24.0014	24.0013	24.0014	24.0013	24.0013	24.0013	24.0013	24.0013	24.0013	24.0013	24.0013	24.0013	24.4585	233124	13.4269	0.229695	13.3217	24.0025	24.0017
08/06 17:00:00	16.1	170.248	24.0015	24.002	24.0019	24.0019	24.5825	24.6808	24.0013	24.0013	24.0014	24.0013	24.0013	24.0013	24.0013	24.0012	24.0013	24.0013	24.0013	24.0012	24.4569	233642	13.505	0.229983	13.2762	24.0024	24.0017
08/06 17:05:00	16.15	171.524	24.0008	24.0015	24.0015	24.0015	24.6119	24.7147	24.0012	24.0012	24.0012	24.0011	24.0012	24.0012	24.0012	24.0012	24.0012	24.0012	24.0012	24.0012	24.4748	224873	13.5805	0.230406	13.2562	24.0023	24.0014
08/06 17:10:00	16.2	172.253	24.0008	24.0014	24.0014	24.0014	24.6225	24.726	24.0011	24.0011	24.0011	24.0011	24.0011	24.0011	24.0011	24.0011	24.0011	24.0011	24.0011	24.0011	24.4735	221443	13.6451	0.230105	13.2546	24.0022	24.0013
08/06 17:15:00	16.25	172.431	24.0008	24.0014	24.0014	24.0014	24.623	24.7264	24.0011	24.0011	24.0011	24.0011	24.0011	24.0011	24.0011	24.0011	24.0011	24.0011	24.0011	24.0011	24.4641	219393	13.6986	0.229517	13.2704	24.0021	24.0013
08/06 17:20:00	16.3	172.057	24.0008	24.0014	24.0014	24.0014	24.6202	24.7236	24.0011	24.0011	24.0011	24.0011	24.0011	24.0011	24.0011	24.0011	24.0011	24.0011	24.0011	24.0011	24.4525	217936	13.7411	0.228747	13.3027	24.0021	24.0013
08/06 17:25:00	16.35	171.129	24.0008	24.0014	24.0014	24.0014	24.617	24.7206	24.0011	24.0011	24.0011	24.0011	24.0011	24.0011	24.0011	24.0011	24.0011	24.0011	24.0011	24.0011	24.4414	216914	13.7726	0.227837	13.3506	24.002	24.0013
08/06 17:30:00	16.4	169.644	24.0008	24.0014	24.0014	24.0014	24.6144	24.7183	24.0011	24.0011	24.0011	24.0011	24.0011	24.0011	24.0011	24.0011	24.0011	24.0011	24.0011	24.0011	24.4311	216243	13.7929	0.226819	13.4132	24.0019	24.0013
08/06 17:35:00	16.45	157.987	24.0008	24.0014	24.0014	24.0013	24.6127	24.717	24.0011	24.0011	24.0011	24.0011	24.0011	24.0011	24.0011	24.0011	24.0011	24.0011	24.0011	24.0011	24.4216	215788	13.6097	0.22572	13.4896	24.0019	24.0013
08/06 17:40:00	16.5	146.536	24.0008	24.0014	24.0014	24.0013	24.6116	24.7163	24.001	24.001	24.0011	24.0011	24.0011	24.0011	24.0011	24.0011	24.0011	24.001	24.0011	24.0011	24.4126	215503	13.4307	0.224539	13.5398	24.0018	24.0013
08/06 17:45:00	16.55	135.294	24.0008	24.0014	24.0014	24.0013	24.6109	24.7159	24.001	24.001	24.0011	24.0011	24.001	24.001	24.0011	24.0011	24.001	24.001	24.0011	24.0011	24.4039	215352	13.2559	0.223267	13.565	24.0018	24.0013
08/06 17:50:00	16.6	124.261	24.0008	24.0014	24.0014	24.0013	24.6104	24.7157	24.001	24.001	24.0011	24.0011	24.001	24.001	24.0011	24.0011	24.001	24.001	24.0011	24.0011	24.3952	215302	13.0852	0.221906	13.5664	24.0018	24.0013
08/06 17:55:00	16.65	113.439	24.0008	24.0014	24.0014	24.0013	24.6101	24.7155	24.001	24.001	24.0011	24.0011	24.001	24.001	24.0011	24.0011	24.001	24.001	24.0011	24.0011	24.3866	215328	12.9188	0.220459	13.5453	24.0017	24.0013
08/06 18:00:00	16.7	102.831	24.0008	24.0014	24.0014	24.0013	24.6098	24.7155	24.001	24.001	24.0011	24.0011	24.001	24.001	24.0011	24.0011	24.001	24.001	24.0011	24.0011	24.378	215412	12.7566	0.218976	13.503	24.0017	24.0013
08/06 18:05:00	16.6083	92.438	23.8934	24.0004	24.0005	24.0005	24.6115	24.7216	24.0004	24.0004	24.0004	24.0004	24.0004	24.0004	24.0004	24.0005	24.0004	24.0004	24.0004	24.0004	24.094	207814	12.4571	0.217457	13.4406	24.0014	24.0005
08/06 18:10:00	16.5167	82.2604	23.7581	24.0007	24.0008	24.0008	24.6088	24.7237	24.0005	24.0005	24.0006	24.0006	24.0006	24.0006	24.0006	24.0006	24.0006	24.0006	24.0006	24.0006	23.8484	201493	12.1619	0.216036	13.347	24.0013	24.0007
08/06 18:15:00	16.425	72.2994	23.6868	24.0006	24.0007	24.0007	24.6015	24.7186	24.0004	24.0005	24.0005	24.0005	24.0005	24.0005	24.0005	24.0005	24.0005	24.0005	24.0005	24.0005	23.7452	196840	11.871	0.214373	13.2234	24.0013	24.0007
08/06 18:20:00	16.3333	62.5559	23.6364	24.0006	24.0007	24.0007	24.5932	24.7122	24.0004	24.0004	24.0004	24.0004	24.0004	24.0004	24.0004	24.0004	24.0004	24.0004	24.0004	24.0004	23.6692	193054	11.5845	0.212494	13.0711	24.0013	24.0006
08/06 18:25:00	16.2417	53.0303	23.6	23.9937	24.0006	24.0006	24.5848	24.7061	24.0003	24.0003	24.0004	24.0004	24.0004	24.0004	24.0004	24.0004	24.0003	24.0004	24.0004	24.0003	23.606	189972	11.3023	0.21042	12.8914	24.0013	24.0006
08/06 18:30:00	16.15	43.7229	23.5727	23.9824	24.0006	24.0006	24.5763	24.7005	24.0003	24.0003	24.0003	24.0003	24.0003	24.0003	24.0003	24.0003	24.0003	24.0003	24.0003	24.0003	23.5497	187436	11.0245	0.208175	12.6855	24.0013	24.0005
08/06 18:35:00	16.0583	38.1725	23.5515	23.9695	24.0006	24.0005	24.5682	24.6959	24.0003	23.9846	24.0003	24.0003	24.0003	24.0003	24.0003	24.0003	24.0003	24.0003	24.0003	24.0003	23.4974	185255	10.8218	0.205775	12.4548	24.0013	24.0005
08/06 18:40:00	15.9667	32.9749	23.5344	23.956	24.0005	24.0005	24.5592	24.6908	23.9781	23.9545	24.0003	24.0003	24.0002	24.0002	24.0003	24.0003	24.0002	24.0002	24.0003	24.0003	23.4489	183514	10.6262	0.20323	12.2225	24.0013	24.0005
08/06 18:45:00	15.875	28.1291	23.5202	23.9442	24.0005	24.0005	24.5504	24.6864	23.9484	23.9199	24.0002	24.0003	24.0002	24.0002	24.0002	24.0002	24.0002	24.0002	24.0002	24.0002	23.4031	181936	10.4376	0.200564	11.9888	24.0013	24.0004
08/06 18:50:00	15.7833	23.6337	23.5081	23.9343	24.0005	24.0005	24.5425	24.6832	23.9152	23.8823	24.0002	24.0002	24.0002	24.0002	24.0002	24.0002	24.0002	24.0002	24.0002	24.0002	23.3583	180474	10.256	0.19778	11.7539	24.0013	24.0004
08/06 18:55:00	15.6917	19.4868	23.4975	23.9254	24.0005	24.0004	24.5348	24.6805	23.8808	23.8436	24.0002	24.0002	24.0002	24.0002	24.0002	24.0002	24.0002	24.0002	24.0002	24.0002	23.314	179146	10.0814	0.194877	11.5182	24.0013	24.0004
08/06 19:00:00	15.6	15.6863	23.4879	23.9168	24.0005	24.0004	24.5274	24.6782	23.846	23.8046	24.0002	24.0002	24.0002	24.0001	24.0002	24.0001	24.0001	24.0001	24.0002	24.0001	23.2699	177876	9.91373	0.191862	11.2817	24.0013	24.0004
08/06 19:05:00	15.4583	0	23.4792	23.9086	24.0004	24.0004	24.5206	24.6774	23.7996	23.754	23.9748	24.0001	24.0001	23.9977	24.0001	24.0001	23.9851	23.9637	24.0001	24.0001	23.2206	175840	9.45833	0.188734	11.0448	24.0005	24.0002
08/06 19:10:00	15.3167	0	23.4712	23.8989	24.0004	24.0003	24.5122	24.6757	23.7541	23.7048	23.9181	24	24.0001	23.9693	24.0001	24	23.9507	23.9187	24.0001	24	23.169	174089	9.31667	0.18607	10.7949	24.0007	23.9985
08/06 19:15:00	15.175	0	23.4637	23.8878	24.0003	24.0003	24.5022	24.6727	23.7127	23.6603	23.863	23.9744	23.9885	23.9353	24	24	23.9121	23.8735	24	24	23.1169	172420	9.175	0.183786	10.5578	24.0007	23.9954
08/06 19:20:00	15.0333	0	23.4566	23.876	24.0003	24.0003	24.4913	24.669	23.674	23.6189	23.8116	23.9182	23.9645	23.8995	24	23.9999	23.8717	23.8282	23.9825	23.9999	23.0651	170838	9.03333	0.181751	10.3332	24.0006	23.991
08/06 19:25:00	14.8917	0	23.4498	23.864	24.0003	24.0002	24.4799	24.6647	23.6374	23.5799	23.7641	23.8562	23.9359	23.8635	24	23.9999	23.8309	23.7839	23.9471	23.9666	23.0143	169352	8.89167	0.1799	10.1206	24.0006	23.9862
08/06 19:30:00	14.75	0	23.4434	23.8522	24.0002	24.0002	24.4684	24.6602	23.6026	23.5428	23.7198	23.7952	23.9054	23.8278	23.9918	23.9999	23.7904	23.7401	23.9057	23.9154	22.9638	167957	8.75	0.178181	9.91968	24.0005	23.9804
08/06 19:35:00	14.6083	0	23.4372	23.8406	24.0002	24.0002	24.4569	24.6552	23.569	23.5073	23.6783	23.7372	23.8744	23.7925	23.9673	23.9945	23.7503	23.697	23.8622	23.8592	22.9133	166645	8.60833	0.176558	9.73014	24.0005	23.9728
08/06 19:40:00	14.4667	0	23.4312	23.8294	24.0002	24.0002	24.4456	24.6496	23.5367	23.473	23.6389	23.6828	23.8432	23.7579	23.937	23.9638	23.7105	23.6546	23.8183	23.8023	22.8628	165398	8.46667	0.175007	9.54568	24.0005	23.9631
08/06 19:45:00	14.325	0	23.4254	23.8185	24.0002	23.9933	24.4346	24.6435	23.5054	23.4399	23.6015	23.6311	23.8123	23.7239	23.9044	23.9247	23.6709	23.6124	23.7743	23.7458	22.8133	164198	8.325	0.173498	9.36573	24.0004	23.9528
08/06 19:50:00	14.1833	0	23.4197	23.808	24.0002	23.9819	24.4238	24.637	23.475	23.4078	23.5658	23.5829	23.7817	23.6905	23.8713	23.8834	23.6316	23.571	23.7309	23.691	22.764	163041	8.18333	0.172019	9.18968	24.0004	23.9424
08/06 19:55:00	14.0417	0	23.4142	23.7979	24.0001	23.9679	24.4133	24.6302	23.4453	23.3766	23.5316	23.5374	23.7513	23.6575	23.8382	23.8421	23.5927	23.5299	23.6882	23.638	22.7147	161922	8.04167	0.170567	9.01696	24.0004	23.9321
08/06 20:00:00	13.9	0	23.4088	23.7881	24.0001	23.9525	24.4031	24.6233	23.4163	23.3462	23.4987	23.4946	23.7211	23.6252	23.8056	23.8015	23.5539	23.4895	23.6462	23.5868	22.6652	160833	7.9	0.169131	8.84698	24.0004	23.9219
08/06 20:05:00	13.8083	0	23.3815	23.759	23.9956	23.9165	24.3932	24.6178	23.372	23.3006	23.4507	23.4381	23.6764	23.5784	23.7579	23.7474	23.5003	23.4339	23.589	23.5221	22.6184	159936	7.80833	0.167711	8.67917	24.0002	23.9041
08/06 20:10:00	13.7167	0	23.3621	23.7367	23.9867	23.8865	24.3823	24.6105	23.3382	23.2658	23.4136	23.3937	23.6411	23.541	23.7199	23.7033	23.4569	23.389	23.5424	23.4689	22.5711	159254	7.71667	0.166386	8.54167	23.9985	23.8863
08/06 20:15:00	13.625	0	23.3475	23.7194	23.9777	23.8608	24.3712	24.6025	23.3092	23.2354	23.3815	23.3549	23.6106	23.5084	23.6868	23.6645	23.4179	23.3484	23.5006	23.4208	22.524	158491	7.625	0.165149	8.40833	23.9954	23.8698
08/06 20:20:00	13.5333	0	23.3361	23.705	23.9685	23.8376	24.3605	24.5941	23.2821	23.2074	23.3522	23.3195	23.5819	23.4782	23.6563	23.6285	23.3806	23.31	23.4612	23.3754	22.4772	157762	7.53333	0.163989	8.27917	23.991	23.8539
08/06 20:25:00	13.4417	0	23.3268	23.6925	23.9592	23.8159	24.3503	24.5856	23.2567	23.1809	23.3253	23.2862	23.5547	23.4491	23.6278	23.5942	23.3448	23.2727	23.4236	23.3317	22.4307	157060	7.44167	0.162899	8.15417	23.9862	23.8385
08/06 20:30:00	13.35	0	23.3187	23.6812	23.95	23.795	24.3405	24.5771	23.2323	23.1553	23.2991	23.2546	23.5284	23.4209	23.5997	23.5612	23.3096	23.236	23.3863	23.2891	22.3843	156378	7.35	0.161875	8.03333	23.9804	23.8234
08/06 20:35:00	13.2583	0	23.3115	23.6707	23.9408	23.7747	24.3311	24.5687	23.2087	23.1304	23.2739	23.2239	23.5027	23.3932	23.5722	23.5288	23.2749	23.1997	23.3495	23.2474	22.338	155714	7.25833	0.16091	7.91667	23.9728	23.8085
08/06 20:40:00	13.1667	0	23.3049	23.6608	23.9316	23.7546	24.3221	24.5603	23.1857	23.1067	23.2495	23.1947	23.4773	23.3661	23.5451	23.4975	23.2405	23.1637	23.3131	23.2065	22.2916	155063	7.16667	0.159999	7.80417	23.9631	23.7938
08/06 20:45:00	13.075	0	23.2987	23.6513	23.9226	23.7347	24.3134	24.5519	23.1632	23.0831	23.2256	23.1666	23.4523	23.3392	23.5184	23.4669	23.2063	23.1278	23.277	23.1664	22.2453	154423	7.075	0.159138	7.69583	23.9528	23.7792
08/06 20:50:00	12.9833	0	23.2927	23.6422	23.9135	23.7149	24.3049	24.5437	23.1411	23.0598	23.2024	23.1394	23.4274	23.3124	23.4921	23.4369	23.1722	23.0921	23.2411	23.1268	22.1988	153793	6.98333	0.158323	7.59167	23.9424	23.7648
08/06 20:55:00	12.8917	0	23.2869	23.6334	23.9046	23.6952	24.2967	24.5354	23.1195	23.037	23.1792	23.1131	23.4028	23.2859	23.466	23.4074	23.1382	23.0565	23.2056	23.0876	22.1523	153171	6.89167	0.157552	7.49167	23.9321	23.7505
08/06 21:00:00	12.8	0	23.2813	23.6248	23.8957	23.6755	24.2886	24.5272	23.0985	23.0144	23.1567	23.0875	23.3783	23.2596	23.4402	23.3784	23.1041	23.021	23.1702	23.0489	22.1055	152555	6.8	0.156823	7.39583	23.9219	23.7364
08/06 21:05:00	12.8	0	23.2757	23.6164	23.8868	23.6557	24.2811	24.5196	23.0799	22.9945	23.1371	23.0648	23.3563	23.2358	23.417	23.3522	23.0725	22.988	23.1373	23.0129	22.0642	152525	6.8	0.156133	7.30417	23.9041	23.723
08/06 21:10:00	12.8	0	23.2703	23.6079	23.8777	23.6356	24.2742	24.5123	23.0623	22.9757	23.1187	23.0436	23.3353	23.213	23.3948	23.3271	23.0419	22.9559	23.1054	22.9781	22.0251	152499	6.8	0.155516	7.22014	23.8863	23.7098
08/06 21:15:00	12.8	0	23.2649	23.5997	23.8688	23.6157	24.2675	24.5052	23.0455	22.9577	23.1011	23.0234	23.3149	23.1909	23.3734	23.3029	23.0118	22.9245	23.0741	22.944	21.9872	152475	6.8	0.154953	7.14375	23.8698	23.697
08/06 21:20:00	12.8	0	23.2595	23.5916	23.86	23.5958	24.2612	24.4983	23.0292	22.9402	23.0842	23.0039	23.295	23.1692	23.3525	23.2793	22.9822	22.8934	23.0433	22.9105	21.9498	152452	6.8	0.154451	7.075	23.8539	23.6844
08/06 21:25:00	12.8	0	23.2542	23.5838	23.8513	23.5759	24.255	24.4916	23.0133	22.9231	23.0678	22.9851	23.2755	23.1479	23.332	23.2562	22.9528	22.8627	23.0129	22.8775	21.9129	152431	6.8	0.154009	7.01389	23.8385	23.672
08/06 21:30:00	12.8	0	23.2489	23.5761	23.8427	23.5561	24.2489	24.485	22.9978	22.9064	23.0518	22.9669	23.2562	23.127	23.3119	23.2336	22.9238	22.8322	22.9828	22.845	21.8762	152412	6.8	0.153623	6.96042	23.8234	23.6597
08/06 21:35:00	12.8	0	23.2437	23.5685	23.8341	23.5363	24.243	24.4784	22.9826	22.8901	23.0362	22.9491	23.2372	23.1063	23.292	23.2114	22.895	22.802	22.9529	22.8128	21.8397	152393	6.8	0.153293	6.91458	23.8085	23.6476
08/06 21:40:00	12.8	0	23.2385	23.5611	23.8256	23.5165	24.2372	24.4719	22.9677	22.874	23.021	22.9318	23.2185	23.0859	23.2725	23.1896	22.8663	22.7721	22.9233	22.781	21.8035	152375	6.8	0.153016	6.87639	23.7938	23.6356
08/06 21:45:00	12.8	0	23.2333	23.5537	23.8172	23.4968	24.2314	24.4654	22.9531	22.8583	23.0061	22.9149	23.2	23.0658	23.2532	23.168	22.8379	22.7423	22.8939	22.7495	21.7674	152359	6.8	0.152792	6.84583	23.7792	23.6237
08/06 21:50:00	12.8	0	23.2282	23.5464	23.8088	23.477	24.2257	24.459	22.9387	22.8428	22.9914	22.8984	23.1817	23.0459	23.2341	23.1468	22.8096	22.7127	22.8647	22.7183	21.7316	152343	6.8	0.15262	6.82292	23.7648	23.612
08/06 21:55:00	12.8	0	23.2231	23.5392	23.8005	23.4572	24.2201	24.4526	22.9245	22.8275	22.9771	22.8822	23.1636	23.0262	23.2153	23.1259	22.7815	22.6833	22.8357	22.6873	21.6959	152328	6.8	0.152499	6.80764	23.7505	23.6003
08/06 22:00:00	12.8	0	23.218	23.5321	23.7921	23.4374	24.2146	24.4463	22.9102	22.8124	22.9629	22.8664	23.1458	23.0067	23.1967	23.1053	22.7536	22.654	22.8069	22.6566	21.6604	152314	6.8	0.152429	6.8	23.7364	23.5888
08/06 22:05:00	12.75	0	23.213	23.5251	23.7839	23.4177	24.2088	24.4397	22.8948	22.796	22.9475	22.8492	23.1266	22.9859	23.1767	23.0834	22.7244	22.6234	22.7767	22.6245	21.6221	152027	6.75	0.152409	6.8	23.723	23.5768
08/06 22:10:00	12.7	0	23.208	23.5181	23.7757	23.3979	24.2028	24.4329	22.8791	22.7793	22.9316	22.8318	23.107	22.9647	23.1564	23.0612	22.6947	22.5923	22.746	22.5922	21.5826	151735	6.7	0.152367	6.79583	23.7098	23.5648
08/06 22:15:00	12.65	0	23.203	23.5112	23.7675	23.378	24.1968	24.426	22.8632	22.7624	22.9157	22.8143	23.0872	22.9434	23.136	23.0389	22.6647	22.5611	22.7152	22.5597	21.5426	151438	6.65	0.152304	6.7875	23.697	23.5528
08/06 22:20:00	12.6	0	23.198	23.5043	23.7593	23.3582	24.1906	24.4191	22.8473	22.7455	22.8997	22.7968	23.0674	22.9221	23.1155	23.0166	22.6346	22.5298	22.6843	22.5273	21.5024	151137	6.6	0.152217	6.775	23.6844	23.5408
08/06 22:25:00	12.55	0	23.1931	23.4974	23.7512	23.3383	24.1845	24.4121	22.8314	22.7286	22.8837	22.7794	23.0475	22.9008	23.0951	22.9944	22.6045	22.4985	22.6534	22.4948	21.4621	150832	6.55	0.152108	6.75833	23.672	23.5288
08/06 22:30:00	12.5	0	23.1882	23.4906	23.743	23.3183	24.1783	24.405	22.8155	22.7118	22.8677	22.762	23.0277	22.8796	23.0746	22.9723	22.5742	22.4671	22.6224	22.4623	21.4218	150524	6.5	0.151974	6.7375	23.6597	23.5168
08/06 22:35:00	12.45	0	23.1833	23.4839	23.7349	23.2983	24.1721	24.3979	22.7996	22.6949	22.8518	22.7448	23.0079	22.8584	23.0543	22.9503	22.544	22.4357	22.5914	22.4299	21.3816	150214	6.45	0.151817	6.7125	23.6476	23.5049
08/06 22:40:00	12.4	0	23.1784	23.4771	23.7269	23.2783	24.1658	24.3908	22.7838	22.6781	22.8359	22.7276	22.9881	22.8373	23.0339	22.9283	22.5137	22.4043	22.5604	22.3975	21.3415	149900	6.4	0.151636	6.68333	23.6356	23.4929
08/06 22:45:00	12.35	0	23.1735	23.4704	23.7188	23.2582	24.1596	24.3837	22.768	22.6614	22.82	22.7104	22.9684	22.8162	23.0137	22.9064	22.4834	22.373	22.5294	22.3652	21.3014	149585	6.35	0.151429	6.65	23.6237	23.4811
08/06 22:50:00	12.3	0	23.1686	23.4637	23.7108	23.2381	24.1533	24.3765	22.7522	22.6447	22.8043	22.6934	22.9487	22.7951	22.9935	22.8846	22.4531	22.3416	22.4985	22.3329	21.2616	149267	6.3	0.151198	6.6125	23.612	23.4692
08/06 22:55:00	12.25	0	23.1638	23.4571	23.7027	23.2179	24.147	24.3694	22.7364	22.628	22.7885	22.6764	22.9291	22.7742	22.9733	22.8629	22.4229	22.3103	22.4675	22.3007	21.2218	148946	6.25	0.150942	6.57083	23.6003	23.4574
08/06 23:00:00	12.2	0	23.159	23.4504	23.6947	23.1977	24.1408	24.3622	22.7208	22.6114	22.7728	22.6594	22.9095	22.7533	22.9532	22.8413	22.3926	22.279	22.4366	22.2685	21.1823	148624	6.2	0.15066	6.525	23.5888	23.4456
08/06 23:05:00	12.2	0	23.1542	23.4438	23.6867	23.1775	24.1347	24.3553	22.7061	22.5959	22.7582	22.6436	22.891	22.7335	22.9343	22.8208	22.3634	22.2488	22.4068	22.2375	21.146	148627	6.2	0.150352	6.475	23.5768	23.4341
08/06 23:10:00	12.2	0	23.1494	23.4372	23.6788	23.1573	24.1289	24.3485	22.692	22.5809	22.744	22.6282	22.8731	22.7143	22.9159	22.8009	22.3348	22.2191	22.3776	22.207	21.1113	148630	6.2	0.150069	6.42917	23.5648	23.4229
08/06 23:15:00	12.2	0	23.1446	23.4306	23.6708	23.137	24.1232	24.3419	22.6781	22.5662	22.7302	22.6132	22.8554	22.6954	22.8978	22.7813	22.3064	22.1898	22.3486	22.1768	21.0775	148634	6.2	0.14981	6.3875	23.5528	23.4117
08/06 23:20:00	12.2	0	23.1398	23.424	23.6629	23.1168	24.1175	24.3353	22.6644	22.5516	22.7165	22.5983	22.838	22.6767	22.88	22.7619	22.2783	22.1606	22.3199	22.1469	21.0444	148637	6.2	0.149577	6.35	23.5408	23.4007
08/06 23:25:00	12.2	0	23.135	23.4175	23.6549	23.0966	24.1119	24.3288	22.6508	22.5372	22.703	22.5836	22.8207	22.6581	22.8623	22.7428	22.2503	22.1317	22.2914	22.1172	21.0118	148641	6.2	0.149368	6.31667	23.5288	23.3897
08/06 23:30:00	12.2	0	23.1303	23.411	23.6471	23.0764	24.1063	24.3223	22.6374	22.5229	22.6896	22.569	22.8036	22.6397	22.8447	22.7237	22.2225	22.1028	22.263	22.0876	20.9797	148644	6.2	0.149186	6.2875	23.5168	23.3787
08/06 23:35:00	12.2	0	23.1255	23.4045	23.6392	23.0563	24.1007	24.3159	22.6241	22.5087	22.6763	22.5545	22.7866	22.6215	22.8274	22.7048	22.1948	22.0742	22.2348	22.0582	20.948	148648	6.2	0.149029	6.2625	23.5049	23.3678
08/06 23:40:00	12.2	0	23.1208	23.398	23.6313	23.0361	24.0952	24.3094	22.6108	22.4946	22.6631	22.5401	22.7697	22.6033	22.8101	22.6861	22.1672	22.0456	22.2067	22.029	20.9167	148652	6.2	0.148899	6.24167	23.4929	23.357
08/06 23:45:00	12.2	0	23.1161	23.3915	23.6235	23.0161	24.0897	24.303	22.5977	22.4806	22.65	22.5258	22.7528	22.5853	22.7929	22.6674	22.1398	22.0172	22.1787	21.9998	20.8858	148655	6.2	0.148794	6.225	23.4811	23.3462
08/06 23:50:00	12.2	0	23.1114	23.3851	23.6157	22.996	24.0841	24.2965	22.5846	22.4667	22.6369	22.5116	22.7361	22.5674	22.7758	22.6489	22.1124	21.9889	22.1508	21.9709	20.8552	148659	6.2	0.148717	6.2125	23.4692	23.3354
08/06 23:55:00	12.2	0	23.1067	23.3787	23.6079	22.976	24.0786	24.2901	22.5716	22.4529	22.624	22.4975	22.7195	22.5496	22.7588	22.6305	22.0852	21.9608	22.1231	21.942	20.8249	148663	6.2	0.148666	6.20417	23.4574	23.3247
08/06 24:00:00	12.2	0	23.102	23.3723	23.6001	22.956	24.0731	24.2836	22.5586	22.4392	22.6111	22.4835	22.7029	22.5319	22.7419	22.6122	22.058	21.9327	22.0955	21.9133	20.795	148667	6.2	0.148643	6.2	23.4456	23.3141
08/07 00:05:00	12.1583	0	23.0973	23.3659	23.5924	22.936	24.0673	24.277	22.5459	22.4253	22.5981	22.4694	22.686	22.5139	22.7247	22.5937	22.0302	21.9044	22.0676	21.8844	20.7627	148377	6.15833	0.148646	6.2	23.4341	23.3033
08/07 00:10:00	12.1167	0	23.0927	23.3595	23.5846	22.9161	24.0615	24.2702	22.533	22.4113	22.5851	22.4552	22.669	22.4958	22.7074	22.575	22.0026	21.8759	22.0395	21.8552	20.7296	148086	6.11667	0.148625	6.19653	23.4229	23.2926
08/07 00:15:00	12.075	0	23.088	23.3532	23.5769	22.8962	24.0555	24.2633	22.5199	22.3973	22.572	22.441	22.652	22.4777	22.6901	22.5563	21.9749	21.8474	22.0114	21.826	20.6961	148053	6.075	0.14858	6.18958	23.4117	23.2818
08/07 00:20:00	12.0333	0	23.0834	23.3468	23.5692	22.8763	24.0495	24.2564	22.5069	22.3834	22.559	22.4268	22.635	22.4596	22.6729	22.5376	21.9472	21.8189	21.9832	21.7969	20.6626	148043	6.03333	0.148532	6.17917	23.4007	23.2711
08/07 00:25:00	11.9917	0	23.0787	23.3405	23.5615	22.8564	24.0435	24.2494	22.4938	22.3695	22.546	22.4127	22.6181	22.4415	22.6556	22.5191	21.9195	21.7904	21.9551	21.7678	20.629	13218.6	5.99167	0.148482	6.16528	23.3897	23.2604
08/07 00:30:00	11.95	0	23.0741	23.3342	23.5538	22.8365	24.0375	24.2424	22.4808	22.3557	22.533	22.3987	22.6012	22.4236	22.6385	22.5005	21.8918	21.762	21.927	21.7387	20.5955	13218.6	5.95	0.137197	6.14792	23.3787	23.2497
08/07 00:35:00	11.9083	0	23.0695	23.3279	23.5461	22.8167	24.0314	24.2354	22.4679	22.3419	22.5202	22.3847	22.5844	22.4057	22.6213	22.4821	21.8642	21.7336	21.899	21.7097	20.5621	13218.6	5.90833	0.125911	6.12708	23.3678	23.239
08/07 00:40:00	11.8667	0	23.0649	23.3216	23.5385	22.7968	24.0253	24.2284	22.4549	22.3282	22.5073	22.3708	22.5676	22.3878	22.6043	22.4637	21.8366	21.7052	21.8709	21.6807	20.5287	13218.6	5.86667	0.114626	6.10278	23.357	23.2284
08/07 00:45:00	11.825	0	23.0603	23.3153	23.5308	22.7769	24.0192	24.2214	22.4421	22.3145	22.4946	22.357	22.5509	22.37	22.5873	22.4453	21.8091	21.6769	21.843	21.6518	20.4954	13218.6	5.825	0.10334	6.075	23.3462	23.2178
08/07 00:50:00	11.7833	0	23.0557	23.3091	23.5232	22.7571	24.0131	24.2144	22.4293	22.3009	22.4818	22.3432	22.5342	22.3523	22.5703	22.4271	21.7816	21.6487	21.815	21.623	20.4622	13218.6	5.78333	0.0920532	6.04375	23.3354	23.2072
08/07 00:55:00	11.7417	0	23.0511	23.3028	23.5156	22.7373	24.0071	24.2073	22.4165	22.2873	22.4692	22.3294	22.5176	22.3347	22.5534	22.4089	21.7541	21.6205	21.7871	21.5941	20.4291	13218.6	5.74167	0.0807665	6.00903	23.3247	23.1967
08/07 01:00:00	11.7	0	23.0466	23.2965	23.508	22.7174	24.0009	24.2002	22.4038	22.2738	22.4566	22.3157	22.501	22.3171	22.5366	22.3908	21.7267	21.5923	21.7593	21.5654	20.396	13218.6	5.7	0.0694795	5.97083	23.3141	23.1861
08/07 01:05:00	11.7917	0	23.042	23.2903	23.5003	22.6974	23.9956	24.1939	22.3942	22.2636	22.4471	22.3052	22.4877	22.3028	22.523	22.3759	21.7025	21.5675	21.7346	21.5399	20.3714	13218.6	5.79167	0.0581922	5.92917	23.3033	23.1766
[truncated: 7,187 more rows]
