# Supplementary material for: Multi-Objective Control of Air Conditioning Improves Cost, Comfort and System Energy Balance
Source: Preprints.org preprint supplement (doi:10.20944/preprints201808.0120.v3), 2018-09-10
Supplement: Supplementary file 2 [file pjmLMP.xlsx]

## Sheet: Sheet1
PUBLISHDATE	VERSION						H1	H2	H3	H4	H5	H6	H7	H8	H9	H10	H11	H12	H13	H14	H15	H16	H17	H18	H19	H20	H21	H22	H23	H24
2013-01-01	0						28.56	27.12	26	25.57	25.57	26.08	27.16	28.45	29.74	30.66	31.17	31.37	30.75	30.98	30.32	29.94	32.07	36.91	38.54	36.5	35.93	34.27	31.57	30.21
2013-01-02	0						30.96	30.12	29.85	29.79	30.13	31.73	38	45.16	43.74	43.27	42.35	37.97	35.45	34.99	34.13	34.36	38.34	58.91	61.31	48.26	48.51	40.04	36.49	33.37
2013-01-03	0						31.04	30.06	29.72	29.77	30.06	31.47	39.33	46.18	40.94	39.13	37.69	34.31	32.19	31.62	31	30.82	33.04	46.3	42.33	40.27	39.2	34.11	32.43	31.15
2013-01-04	0						28.85	27.63	27.46	27.37	28.18	29.36	37.5	39.92	36.51	34.68	34.42	32.79	32	31.01	30.17	29.61	31.12	39.32	38.97	36.17	34.88	32.7	31.27	29.53
2013-01-05	0						29.46	28.28	27.7	27.95	27.9	28.96	30.06	31.99	32.75	32.78	31.7	30.74	29.55	27.89	26.63	26.52	28.16	36.23	35.05	33.95	32.69	30.43	28.65	27.1
2013-01-06	0						27.47	25.69	25.51	25.35	25.31	25.58	26.61	28.17	29.07	30.08	29.73	29.34	28.29	27.21	26.47	26.59	28.63	36.02	35.91	34.87	34.16	32.41	29.43	27.43
2013-01-07	0						26.92	26.63	25.4	25.57	25.93	27.55	34.08	36.93	34.37	33.97	32.75	31.42	30.17	29.5	28.58	28.5	29.59	38.2	37.46	35.51	34.93	31.84	28.92	26.41
2013-01-08	0						25.71	25.27	25.17	25.27	25.48	28.37	36.6	37.64	35.1	33.64	32.23	30.51	29.57	28.76	28.14	27.73	28.99	35.33	35.68	34.37	33.85	30.21	27.44	25.19
2013-01-09	0						25	24.85	24.67	24.38	24.66	26.72	32.43	34.64	32.44	31.6	30.71	29.5	28.63	27.95	27.24	26.96	27.77	35.39	35.73	34.14	33.2	30.48	28.2	25.47
2013-01-10	0						25.36	24.92	24.4	24.39	24.62	26.12	32.11	33.37	31.81	31.17	30.14	28.2	27.46	26.91	26.2	26.19	26.66	34.06	34.09	32.17	31.61	28.83	26.7	24.94
2013-01-11	0						24.39	23.82	22.88	22.86	23.46	25	30.3	32.66	31.4	31.2	31.39	29.91	28.79	28.14	26.98	26.45	27.43	33.63	32.59	30.42	29.42	26.35	25.21	23.19
2013-01-12	0						23.56	21.74	20.58	20.8	21.05	22.12	23.51	25.3	26.64	29.01	28.99	28.64	27.41	25.98	25.5	25.47	26.49	35.55	34.22	32.54	30.86	27.11	25.54	24.37
2013-01-13	0						23.25	21.75	20.23	20.22	20.3	21.68	22.56	23.73	24.82	25.43	25.7	25.75	25.62	25.46	25.16	25.33	27.38	33.46	33.67	33.05	31.33	28.44	25.59	24.26
2013-01-14	0						23.65	23.08	22.76	22.94	23.27	25.22	28.91	31.76	32.66	32.73	33.07	32.14	31.06	30.84	30.28	30.36	32.24	41.03	44.51	38.52	36.12	33.44	29.89	27.78
2013-01-15	0						27.05	26.29	25.63	25.51	26.44	28.86	35.39	38.29	38.25	38.07	37.74	36.94	35.01	33.79	32.19	32.23	34.37	43.51	43.23	39.56	37.56	35.19	31.04	27.83
2013-01-16	0						26.03	25.5	25.11	25.27	25.53	27.6	34.55	36.69	35.14	35.51	35.21	33.66	31.37	30.38	29.38	29.12	31.58	37.5	38.12	35.43	34.67	31.76	28.99	25.66
2013-01-17	0						25.57	24.91	24.75	24.74	25.05	27.56	32.67	36.96	35.23	34.66	34.78	33.06	31.8	31.72	31	31.26	33.36	41	44.06	38.37	37.23	33.55	31.56	28.89
2013-01-18	0						28.24	26.79	26.66	26.91	27.83	31.11	41.06	46.12	39.24	37.45	36.1	33.38	31.67	31.25	30.98	30.94	33.05	42.77	45.46	39.31	37.5	33.17	31.03	29.13
2013-01-19	0						30.89	30.29	30.12	30.14	30.36	30.84	33.88	34.73	35.93	35.95	34.69	32.13	29.8	28.29	27.93	27.59	28.66	34.73	36.82	34.25	32.74	31.11	29.79	28.21
2013-01-20	0						27.27	26.01	25.1	24.85	24.97	25.71	26.69	29.67	30.89	31.62	31.66	31.09	30.14	29.38	28.9	29.02	31.04	41.01	42.92	40.3	40.3	37.13	32.97	31.92
2013-01-21	0						30.28	30.23	29.81	29.72	30.03	30.85	35.1	37.25	39.98	40.95	40.59	38.75	36.9	35.13	34.02	33.93	36.96	46.51	50.45	43.15	42.43	39.01	34.37	31.91
2013-01-22	0						32.26	31.9	32	31.91	32.38	34.61	53.16	69.24	54.04	54.28	52.4	45.62	42.58	41.87	41.17	39.7	44.01	65.89	72.76	61.85	57.34	49.03	41.79	37.36
2013-01-23	0						42.82	40.85	40.68	41.38	42.25	50.01	93.85	112.34	73.51	61.18	61.39	58.25	49.74	46.94	46.43	46.58	51.09	79.94	86.88	62.8	58.18	51.95	44.82	38.35
2013-01-24	0						48.54	46.8	44.09	46	48.2	52.42	90.24	104.34	71.47	69.26	71.32	64.24	53.7	52.67	49.52	49.96	58.12	87.51	100.6	81.97	71.89	67.12	52.29	49.04
2013-01-25	0						48.56	44.85	42.52	44.29	47.42	51.14	79.86	105.92	80.37	69.04	71.7	66.29	56.49	52.56	49.59	48.49	55.78	79.98	79.03	61.12	59.83	52.31	42.17	35.46
2013-01-26	0						43.21	39.92	38.25	38.02	39.23	40.4	41.85	49.07	51.65	52.41	48.93	39.72	35.83	34.68	33.92	33.91	35.31	48.69	47.72	44.56	42.96	40.79	37.82	34.17
2013-01-27	0						36.46	34.78	34.78	34.47	34.42	35.18	37.07	37.33	40.19	38.91	38.07	36.49	34.01	33.19	32.69	32.71	33.98	40.38	41.49	38.77	38.6	36.09	34.26	32.87
2013-01-28	0						30.3	29.07	28.87	28.85	29.22	30.9	35.98	43.1	41.14	41.54	40.92	39.17	35.03	34.25	33.09	33.05	35.78	44.95	41.03	36.41	35.62	32.23	29.48	27.82
2013-01-29	0						24.79	23.5	22.67	22.78	23.05	24.71	29.95	31.45	31.46	31.62	31.88	31.86	30.64	30.09	29.21	28.75	30.28	32.86	33.27	31.9	31.26	28.68	25.57	23.46
2013-01-30	0						21.16	20.36	18.83	18.75	19.41	21.74	27.9	28.67	28.65	29.11	30.06	29.47	28.42	27.9	26.95	26.49	27.61	32.1	33.16	30.76	29.68	27.74	25.08	23.06
2013-01-31	0						22.73	21.5	20.54	20.97	22.25	23.99	30.9	31.53	31.08	31.32	32.03	31.72	30.92	30.77	30.17	30	31.54	39.49	42.09	36.87	35.87	33.52	30.23	28.43
2013-02-01	0						30.26	29.36	29.15	29.18	29.97	32.2	42.8	48.27	45.66	46.16	44.57	43.77	40.06	38.38	37.81	37.73	38.91	53.49	57.27	49.73	48.52	43.85	39.49	36.32
2013-02-02	0						36.83	35.13	34.65	34.53	34.62	34.89	39.93	44.5	48.49	46.25	43.69	39.31	35.94	35.15	34.31	34.15	35.37	40.83	43.1	39.96	38.69	36.6	33.6	31.58
2013-02-03	0						32.76	32.52	32.25	31.51	31.58	31.8	32.37	33.91	35.08	35.16	34.69	33.82	33.53	32.84	32.46	32.3	33.53	39.07	43.35	41.41	38.71	37.26	34.94	33.2
2013-02-04	0						33.49	32.71	32.48	33.18	33.59	36.27	54.66	71.53	56.35	53.42	47.39	44.37	39.92	38	37.11	37.08	39.7	53.55	63.7	47.11	43.87	41.06	36.82	33
2013-02-05	0						30.81	30.17	29.95	30.04	30.29	32.2	44.36	47.55	42.65	42.31	42.15	38.25	36.2	35.15	34.69	34.11	35.98	44.08	46.69	41.36	39.39	36.17	32.7	29.73
2013-02-06	0						29.58	28.94	28.69	28.88	29.21	31.39	39.1	43.45	42.53	41.31	39.82	37.42	35.81	35.13	34.49	34.1	35.7	43.93	50.19	45.9	42.91	38.57	33.53	30.68
2013-02-07	0						29.15	28.61	28.4	28.55	28.78	32.91	45.28	51.24	41.79	40.74	39.32	35.93	34.59	34.02	33.34	33.06	36.17	44.71	48.74	42.42	40.89	35.13	30.46	27.8
2013-02-08	0						29.83	28.53	27.73	27.6	28.16	30.5	35.68	39.19	40.24	41.41	41.91	41.2	38.63	37.13	36.03	35.87	38.17	46.85	51.57	46.03	42.23	37.74	32.66	30.69
2013-02-09	0						34.11	32.44	31.53	31.39	30.69	31	33.85	36.39	38.24	39.63	39.37	37.48	35.06	34.02	33.36	33.17	33.86	41.03	49.11	44.79	42.68	38.82	35.53	31.91
2013-02-10	0						32.6	32.08	30.65	30.4	29.73	30.68	32.22	34.99	35.69	35.64	33.16	31.72	30.88	29.57	28.6	28.25	29.94	35.67	41.64	38.79	37.13	34.32	30.81	28.57
2013-02-11	0						26.79	25.22	24.48	24.4	24.58	27.17	33.97	35.11	37.18	37.45	37.23	36.44	35.08	34.86	33.72	32.91	34.93	37.06	41.99	38.05	36.94	32.79	29.93	27.45
2013-02-12	0						27.46	25.85	25.02	25.21	26.03	28.69	34.85	36.03	35.06	34.46	33.63	32.44	31.93	31.56	30.71	30.13	30.72	33.63	38.28	37.58	36.51	34.35	29.99	28.09
2013-02-13	0						27.27	26.61	25.56	25.57	26.7	28.04	36.26	38.1	37.36	36.76	36.26	34.51	32.74	31.9	31.5	30.73	32.2	36.66	40.69	37.22	36.16	32.77	29.21	26.56
2013-02-14	0						27.05	26.58	26.12	26.13	26.83	28.74	37.46	39.87	35.63	35.72	33.94	32.42	31.06	30.47	29.61	29.06	29.72	32.22	35.96	34.54	34.81	31.53	28.7	26.31
2013-02-15	0						28.18	27.71	27.32	27.16	27.77	29.79	38.23	39.65	38.45	37.59	36.3	34.54	33.04	32.32	31.55	30.79	31.07	32.81	40.41	39.12	37.65	33.55	30.21	28.05
2013-02-16	0						30.06	28	28.05	28.05	28.04	28.88	31.7	33.82	37.17	38.9	38.85	37.83	34.46	32.98	32.2	31.9	33.24	38.36	45.58	42.33	41.33	38.03	33.65	33.13
2013-02-17	0						34.4	34.44	34.45	33.87	33.72	34.21	36.15	37.64	40.05	39.19	39.02	36.66	35.06	34.26	33.2	32.99	34.85	42.21	58.37	52.65	50.66	42.08	37.18	33.18
2013-02-18	0						33.87	32.9	33.07	33.27	34.12	35.53	46.98	53.37	50.58	47.22	43.15	36.87	34.8	33.97	33.19	32.8	34.64	37.39	49.36	41.23	39.22	35.55	33.44	30.36
2013-02-19	0						29.65	29.35	28.69	28.65	29.18	30.4	39.77	42.1	38.95	39.42	39.29	37.43	36.45	35.68	34.74	34.44	35.48	38.36	47.71	45.31	41.98	37.54	32.86	31.36
2013-02-20	0						32.62	30.9	30.53	30.69	31.7	34.37	47.04	55.4	43.55	43.11	41.01	38.85	37.69	36.43	35.52	35.45	36.57	43.18	59.97	47.95	45.41	42.15	35.8	34.25
2013-02-21	0						34.52	33.26	33.12	33.12	34.67	37.09	53.22	65.66	47.27	43.51	42.77	40.17	37.94	36.36	35.28	34.82	35.71	38.02	44.15	42.72	41.35	37.84	33.55	32.7
2013-02-22	0						31.34	30	29.32	29.54	29.74	31.9	39.72	41.55	39.54	39.89	39.32	37.97	36.39	35.3	34.73	33.57	34.52	36.39	39.49	37.57	35.97	33.46	30.27	28.62
2013-02-23	0						30.17	28.55	27.97	28.02	28.05	28.49	29.81	31.36	33.89	35.13	34.54	34.21	31.92	30.36	29.67	28.96	29.46	32.45	35.21	34.31	33.79	30.95	29.63	28.09
2013-02-24	0						28.99	28.17	27.96	27.82	27.96	28.09	28.02	28.71	29.87	30.36	30.33	29.09	28.7	27.91	28.07	27.96	28.33	31.6	37.88	36.6	36.11	33.31	30.54	28.58
2013-02-25	0						29.81	28.99	28.9	28.93	29.29	31.01	39.57	40.62	39.31	38.72	38.44	36.31	33	31.47	31.21	29.96	31.6	34.52	39.72	38.34	37.13	34.21	29.9	28.4
2013-02-26	0						29.54	28.44	27.86	27.89	28.38	29.93	37	38.73	38.71	38.89	38.3	37.32	35.62	34.53	34.09	33.05	34.28	36.16	39.99	38.89	37.62	33.65	30.02	27.97
2013-02-27	0						28.12	26.97	26.73	26.43	27.06	28.39	33.59	36.4	35.3	35.25	35.37	33.52	33.27	32.44	31.73	31	31.35	33.33	38.38	37.67	36.46	32.84	29.36	28.23
2013-02-28	0						28.25	27.42	26.5	26.15	26.7	28.9	36.3	36.68	37.37	36.95	37.07	35.52	33.81	33.27	32.07	31.67	32.77	35.71	39.3	37.67	36.45	34.36	30.18	28.34
2013-03-01	0						29.81	29.25	28.79	28.52	29.18	30.52	40.39	40.53	41.24	40.63	40.27	38.03	36.39	34.32	32.66	32.22	32.79	36.16	41.85	42.61	40.45	36.92	32.32	30.95
2013-03-02	0						33.19	32.03	30.89	30.34	30.27	31.13	33.64	34.95	36.27	38	37.53	36.83	34.34	32.91	32.47	31.74	32.32	35.74	46.1	47.64	39.54	37.56	36.05	32.6
2013-03-03	0						34.55	33.11	33	32.56	32.64	33.09	33.11	35.47	35.43	35.76	35.14	34.61	33.33	31.89	30.89	31.04	31.66	34.25	50.68	49.75	45.67	39.28	37.41	33.66
2013-03-04	0						35.94	35.87	35.18	35.67	37.18	38.89	54.66	61.07	48.64	44.52	45.24	43.3	39.11	37.25	36.8	35.93	35.47	38.68	52.61	60.12	53.04	43.71	37.93	37.55
2013-03-05	0						32.09	29.89	29.4	29.99	30.21	34.61	44.6	47.09	41.85	41.42	41.31	38.09	37.77	36.25	34.76	34.33	35.02	37.04	42.51	42.48	38.66	36.14	31.91	29.12
2013-03-06	0						30.7	29.58	29.19	29.45	30.3	32.61	40.69	43.57	45.48	47.6	46.8	46.5	45.65	45.59	40.86	40.44	41.85	45.96	54.42	56.82	48.63	41.56	35.89	31.69
2013-03-07	0						34.34	32.85	32.05	32.21	33.03	36.65	51.47	51.81	49.19	48.57	45.74	42.67	38.5	37.88	37.33	36.87	38.02	40.71	50.63	50.1	47.51	41.34	35.93	32.52
2013-03-08	0						32.22	31.49	30.78	30.99	31.92	35.34	43.73	46.61	43.01	43.29	41.49	39.54	36.04	35.52	34.47	33.81	34.11	34.56	38.3	41.06	40	36.31	33.92	32.5
2013-03-09	0						36.59	34.35	33.4	32.6	33.39	35.48	38.08	37.65	39.39	39.38	38.22	34.25	32.49	30.65	28.93	28.65	29.31	31.14	38.93	38.57	36.58	34.35	31.85	29.69
2013-03-10	0						30.07	28.83		28.13	28.62	29.38	30.45	30.62	33.14	33.18	32.48	30.27	30.09	29.61	28.42	28.48	28.37	29.7	32.64	38.28	37.41	33.34	29.31	28.38
2013-03-11	0						27.95	27.58	27.5	27.49	28.52	30.49	42.63	48.06	40.08	38.04	40.11	38.47	37.73	36.39	34.49	33.03	33.23	34.75	35.52	41.68	40.47	34.55	30.56	28.94
2013-03-12	0						26.5	26.09	25.81	25.78	26.82	28.62	39.1	43.03	40.18	39.12	40.45	39.88	38.36	37.35	35.97	34.1	33.2	34.53	37.02	40.02	42.87	37.71	32.97	28.91
2013-03-13	0						28.93	27.24	26.89	26.99	27.89	30.6	42.8	45.84	40.83	39.3	39.44	38.61	37.18	35.86	34.11	33.16	34.7	36.84	38.71	45.72	46.17	40.43	34.51	30.4
2013-03-14	0						32.51	31.35	30.7	30.98	32.51	35.01	56.47	73.99	56.74	47.98	47.56	44.28	42.4	39.46	37.78	36.65	37.23	38.62	40.19	48.96	58.56	44.77	37.82	34.14
2013-03-15	0						33.74	30.67	30.05	30.32	32.1	35.65	55.64	74.61	44.52	41.97	41.3	39.44	36.7	35.54	33.05	31.09	31.09	32.79	34.89	37.92	38.5	33.98	31.42	29.89
2013-03-16	0						29.87	29.04	28.18	27.58	27.25	27.67	29.73	33.49	36.98	42.97	43.42	41.67	37.57	35.15	33.11	31.38	31.91	33.68	36.43	40.97	41.8	39.82	34.66	29.77
2013-03-17	0						30.28	29.64	29.43	29.42	29.27	29.26	29.84	31.28	34.68	36.97	37.46	37.02	35	32.74	31.76	31.31	31.45	34.43	37.69	46.61	56.52	39.59	36.18	30.79
2013-03-18	0						34.61	31.27	30.66	31.1	32	35.75	44.13	53.34	56.94	60.52	59.31	56.65	52.43	46.21	45.75	42.06	43.31	44.62	44	47.2	44.58	38.8	34.39	29.11
2013-03-19	0						34.1	31.68	31.26	31.25	31.09	33.73	53.27	59.79	48.43	47.25	46.25	47.06	42.81	41.01	40.84	39.7	40.75	41.27	42.5	50.67	61.86	48.45	41.52	39.1
2013-03-20	0						41.09	39.83	39.89	39.95	41.29	43.25	63.56	80.68	62.06	60.63	53.77	50.43	44.51	42.56	42.12	40.64	41.05	41.84	43.85	54.78	64.85	50.56	45.49	41.34
2013-03-21	0						41	38.01	36.85	38.53	40.95	45.3	65.93	82.28	67.89	65.56	64.25	61.61	55.32	50.31	47.4	47.58	46.19	48.09	52	76.46	84.62	65.97	59.53	45.8
2013-03-22	0						46.35	44.78	44.3	44.69	46.51	49.97	65.94	89.27	62.8	56.28	58.83	48.16	48.37	46.75	45.76	43.14	42.13	41.52	45.3	49.83	47.77	47.51	43.67	41.85
2013-03-23	0						41.11	38.25	36.93	36.65	36.11	37.37	42.15	47.8	48.64	48.82	45.52	41.71	37.8	35.61	33.33	31.36	31.47	31.73	33.75	39	41.79	39.64	35.28	32.93
2013-03-24	0						33.35	31.71	31.73	31.53	31.27	31.96	32.87	32.92	35.82	38.46	37.63	37.42	37	35.56	34.22	33.47	34.21	35.43	37.33	46.66	49.77	44.59	37.03	33.27
2013-03-25	0						33.45	31.95	31.44	32.19	33.27	35.38	47.94	55.85	55.8	55.96	57.12	54.76	51.58	50.75	49.58	48.45	48.95	50.06	55.04	58.7	62.25	52.69	43.04	37.53
2013-03-26	0						37.69	36.47	35.81	36.41	37.42	38.94	51.33	67.87	53.72	49.47	48.66	47.82	46.09	43.46	42.49	40.93	41.15	41.07	43.75	48.46	47.88	46.99	41.99	39.06
2013-03-27	0						40.07	36.37	36.07	36.02	37.14	40.18	50.09	57.05	54.22	47.49	49.74	46.68	44.17	43.06	41.85	39.99	40.04	40.55	42.22	44.14	44.53	44.54	41.01	37.5
2013-03-28	0						33.67	32.67	31.29	31.77	32.9	34.71	46.03	52.95	47.06	46.52	45.43	45.14	42.34	40.67	38.47	36.79	36.15	36.87	38.07	42.93	44.33	43.55	37.26	31.74
2013-03-29	0						30	29.61	28.57	28.86	29.84	30.42	38.64	39.67	39.95	40.2	40.03	39.13	36.41	35.41	33.87	32.22	31.41	31.48	33.56	36.79	39.23	37.32	33.72	29.6
2013-03-30	0						29.23	28.58	28.09	27.73	28.13	28.87	30.17	32.87	35.6	35.95	33.52	31.5	29.82	28.72	27.53	27.31	27.43	27.78	28.77	32.14	36.41	32.73	29.97	27.17
2013-03-31	0						27.59	26.9	26.41	26.28	26.39	26.76	27.55	27.63	30.44	32.44	32.56	29.97	29.27	28.25	27.21	27.11	27.21	27.36	28.47	32.41	35.36	33	30.34	27.01
2013-04-01	0						27.02	26.85	26.72	26.79	27.04	28.97	32.14	35.96	36.41	37.14	38.64	38.76	36.9	37.09	35.73	34.37	34.03	35.35	35.27	37.84	41.49	40.25	34.61	29.96
2013-04-02	0						30.72	30.3	29.81	30.43	31.23	34.47	45.51	49.22	45.29	44.12	43.5	42.37	39.82	37.53	35.44	34.59	34.6	35.28	36.29	41.4	44.5	42.7	35.08	34.44
2013-04-03	0						33.15	32.28	30.9	31.62	33.78	35.82	48.12	65.47	53.17	50.08	47.34	44.16	41.3	39.86	36.76	34.7	34.76	35.22	36.05	45.62	48.14	46.19	35.8	33.54
2013-04-04	0						32.86	30.43	29.92	30.48	31.26	35.56	55.63	67.24	45.54	41.07	41.43	40.19	35.12	34.31	32.96	31.42	30.84	30.97	31.54	35.12	38.57	38.41	30.33	29.15
2013-04-05	0						30.39	29.09	28.7	28.78	29.98	33.37	42.83	46.67	44.45	42.95	40.39	38.82	35.95	33.59	32.42	30.98	30.37	30.76	30.93	33.51	40.34	36.21	32.77	30.22
2013-04-06	0						37.5	34.4	32.74	32.49	33.22	33.49	35.92	38.42	41.34	41.01	37.99	32.61	31.81	29.95	29.82	29.46	30	31.09	30.41	36.13	41.23	37.05	30.1	29.69
2013-04-07	0						30.02	28.22	28.24	27.75	27.47	29.06	30.14	30.36	35.03	34.94	33.32	31.17	30.71	29.84	29.5	29.4	29.57	30.24	30.95	40.25	43.97	39.12	29.93	28.31
2013-04-08	0						29.23	27.91	27.08	26.68	26.84	29.82	38.2	37.08	39.52	40.02	40.86	40.18	39.52	39.01	38.94	38.22	37.46	36.54	35.33	39.07	48.05	39.11	31.35	28.36
2013-04-09	0						28.39	27.63	26.56	26.19	27.04	29.18	33.6	35.89	36.42	36.85	38.42	39.02	40.97	43.13	42.94	42.11	43.34	41.57	37.07	40.97	59.42	41.68	34.06	31.47
2013-04-10	0						27.95	26.38	25.91	25.27	26	29.37	33.79	36.34	36.36	37.93	39.55	41.6	43.62	47.12	50.15	53.07	54.7	54.79	42.97	47.06	53.75	41.76	33.27	32.48
2013-04-11	0						31.63	28.03	26.62	26.37	26.9	32.06	37.3	38.79	42.8	45.74	48.08	48.45	49.05	51.52	48.02	46.13	45.67	43.78	40.28	47.49	48.02	39.71	33.87	30.72
2013-04-12	0						32.76	30.74	29.56	28.78	29.86	36.23	39.45	46.52	47.44	46.48	47.53	46.28	46.58	44.41	43.21	41.72	38.78	37.78	37.38	38.79	44.37	41.05	39.48	35.24
2013-04-13	0						35.15	31.05	30.36	29.22	29.56	30.28	34.44	36.32	39.97	41.54	40.67	39.11	36.81	34.29	33.44	33.19	33.59	34.1	34.89	40.93	53.7	44.97	39.07	34.06
2013-04-14	0						34.66	35	29.72	29.51	29.36	29.69	30.64	32.46	35.06	36.02	34.79	33.61	33.92	32.89	32.16	31.61	32.69	32.77	34.21	40.07	49.93	42.8	31.96	31.32
2013-04-15	0						28.33	26.87	26.25	26.21	27.4	30.02	37.37	40.48	42.84	43.03	44.33	43.91	44.32	44.59	44.83	43.92	43.07	43.17	40.92	44.95	66.35	45.29	35.54	32.77
2013-04-16	0						30.65	29.61	28.31	28.15	29.05	33.08	39.98	44.46	45.35	45.41	46.73	45.83	45.67	46.02	45.96	45.58	44.61	44.17	40.92	44.69	59.04	43.89	38.04	33.14
2013-04-17	0						31.88	30.34	28.46	28.01	29.07	33.15	43.09	46.49	47.96	49.26	50.51	50.77	50.53	59.99	64.72	51.41	50.06	49.95	48.63	50.41	66.04	50.74	40.97	34.14
2013-04-18	0						31.59	27.55	25.2	24.68	25.8	29.53	40.01	42.6	44.82	46.89	48.84	48.64	51.71	56.28	58.53	57.13	56.8	52.01	47.27	52	63.64	48.79	37.28	33.82
2013-04-19	0						34.76	29.84	27.66	26.82	28.04	31.88	45.02	48.05	57.03	58.62	52.58	51.94	52.35	60.58	57.32	53.98	52.68	46.79	43.83	46.78	64.74	47.34	39.11	34.67
2013-04-20	0						34.51	32.44	30.49	30.05	30.01	31.89	35.68	39.16	41.78	48.41	50.51	50.78	48	43.14	40.58	39.44	39.45	40.13	40.4	49.93	63.16	55.69	44.07	37.15
2013-04-21	0						40.12	37.94	35.44	35.07	34.91	35.43	38.69	38.53	40.86	42.12	41.18	38.93	37.02	35.38	34.81	33.89	33.88	35.21	36.29	41.42	60.49	49.48	38.76	35.6
2013-04-22	0						35.29	33.65	33.1	33.77	34.58	39.44	63.11	68.34	66.82	57.05	59.58	60.07	58.21	55.99	50.86	47.04	45.24	45.25	45.13	50.58	66.75	58.72	40.95	36.63
2013-04-23	0						33.8	30.33	29.38	29.46	30.56	34.64	46.34	48.17	47.45	45.35	43.19	42.08	41.97	41.61	43.21	40.85	40.84	40.49	38.76	39.56	50.38	43.14	35.51	31.49
2013-04-24	0						30.11	29.38	27.99	27.78	28.66	33.28	41.52	44.56	45.79	47.15	47.51	48.2	49.65	50.21	50.5	50.05	48.42	47.2	44.51	44.25	48.4	45.55	33.76	33.76
2013-04-25	0						35.92	30.21	28.93	28.77	29.72	37.71	47.62	49.38	48.47	48.31	48.44	47.79	47.39	47.52	47.61	45.56	43.13	41.8	42.34	44.03	57.3	55.39	41.77	37.35
2013-04-26	0						32.61	29.78	28.67	29.13	30.4	35.35	47.05	45.13	46.73	46.5	46.58	44.63	42.95	43.03	41.75	41.18	40.61	38.73	37.38	37.58	44.68	41.75	33.51	32.4
2013-04-27	0						34.19	32.86	30.94	30.33	31.04	32.84	34.97	37.25	42.99	42.02	43.27	42.22	42.66	40.1	37.61	35.93	35.79	36.55	35.76	35.96	44.8	39.99	33.76	33.67
2013-04-28	0						30.79	29.4	28.03	27.31	27.19	27.9	27.87	29.95	32.13	33.68	33.88	34.36	35.03	34.8	33.97	33.29	34.38	35.3	36.08	40.1	47.85	41.62	33.67	33.43
2013-04-29	0						30.96	28.06	27.92	27.84	29.01	31.27	41.46	45.92	46.74	47.39	48.16	47.32	46.96	47.42	47.85	46.7	46.47	46.24	43.68	43.85	49.16	44.77	35.98	31.24
2013-04-30	0						29.08	27.81	25.99	25.39	26.66	29.26	34.95	38.54	40.15	41.05	44.86	45.63	44.83	44.87	47.22	45.38	44.97	44.39	43.19	42.83	48.31	43.22	33.79	31.62
2013-05-01	0						28.75	27.22	25.81	25.78	26.43	29.07	35.59	41.07	40.47	41.68	44.24	44.06	44.85	44.86	45.01	45.42	46.25	46.38	43.45	42.78	45.38	43.35	33.5	30.64
2013-05-02	0						29.09	27.55	26.41	26.18	27.2	29.65	35.17	37.9	39.16	39.33	39.2	39.11	38.32	38.46	40.19	40.72	40.42	39.54	38.83	37.46	39.67	39.49	33.69	30.16
2013-05-03	0						27.77	27.19	26.61	26.19	27.26	30.26	35.13	39.08	40.53	40.26	40.19	39.36	38.9	39.7	39.5	39.77	40.24	40.4	36.56	36.72	40.35	39.54	33.22	29.08
2013-05-04	0						29.49	27.85	26.91	26.35	26.58	27.08	28.52	30.38	35.42	36.68	36.74	36.35	36.12	35.25	34.18	33.43	33.69	33.8	32.62	33.07	38.3	37.82	33.94	30.72
2013-05-05	0						29.98	27.65	26.81	26.45	26.09	26.02	25.59	26.7	29.11	30.77	32.73	32.21	32.07	31.24	30.54	30.76	30.98	32.11	32.38	32.55	39.81	39.25	32.36	30.1
2013-05-06	0						24.28	24.08	23.68	23.38	24.03	25.61	32.47	37.43	39.69	39.32	39.79	38.09	37.94	38.56	37.34	38.7	38.31	38.78	36.6	36.73	41.17	39.47	32.13	27.65
2013-05-07	0						27.55	26.83	26.25	25.73	26.87	29.97	36.08	39.98	42.4	43.12	44.1	43.69	43.33	43.52	43.42	43.35	43.37	42.4	39.47	38.55	44.76	40.96	32.9	31.62
2013-05-08	0						26.73	25.11	24.62	24.33	24.75	26.43	33.23	36.88	39.22	39.77	43.4	42.87	41.96	42.9	43.15	42.9	41.85	42.61	39.6	36.8	43.06	39.7	32.95	31.55
2013-05-09	0						28.1	26.43	25.08	24.59	25.22	30.39	37.34	36.78	39.06	42.98	46.93	46.7	46.18	46.28	47.16	46.86	47.91	46.09	44.72	42.01	50.87	46.69	34.86	32.41
2013-05-10	0						29.75	25.4	24.97	24.42	24.78	29.39	33.94	38	38.63	39.09	44.3	43.63	44.14	49.88	52	52.71	51.07	47.18	41.69	39.42	42.19	39.36	33.13	30.05
2013-05-11	0						32.98	29.36	27.73	25.93	26.13	27.6	30.48	31.38	36.15	41.74	40.91	39.59	39.65	39.29	37.85	36.43	37.35	37.3	37.25	37.22	39.92	40.23	35	29.04
2013-05-12	0						29.26	27.71	25.8	24.63	24.66	24.67	24.83	26.74	28.74	31.35	33.19	33.79	32.54	33	32.56	32.38	32.43	32.39	33.31	33.87	39.06	39.44	33.26	29.75
2013-05-13	0						30.39	29.24	29.38	29.3	30.55	34.23	41.22	48.05	47.04	45.77	45.57	45.26	43.92	43.99	42.29	41.85	41.25	41.55	41.66	40.87	45.78	45.5	37.56	31.77
2013-05-14	0						29.74	27.52	26.68	26.57	27.29	32.15	39.89	42.88	42.35	41.86	41.34	41.2	41.57	42.63	41.99	41.17	41.29	42.03	41.12	39.12	44.31	43.8	33.28	31.13
2013-05-15	0						27.22	25.63	25.28	24.98	25.36	28.13	35.2	35.65	36.29	38.11	40.38	41.69	43.76	44.7	48.28	52.02	55.11	53.19	49	45.44	49.04	45.98	37.77	35.23
2013-05-16	0						33.07	27.46	24.73	24.53	24.77	28.68	33.59	37.98	40.74	43.68	49.45	48.48	49.98	57.05	66.07	62.49	61.12	57.78	49.44	46.45	47.9	46.37	37.86	33.84
2013-05-17	0						30.67	25.86	24.82	24.54	24.93	27.74	32.48	34.56	38.22	40.06	42.84	44.05	43.51	44.56	45.72	46.23	48.16	45.58	43.74	40.97	41.09	41.03	34.53	32.34
2013-05-18	0						30.44	28.73	26.06	24.81	24.72	25.29	27.03	28.51	32.39	36.17	39.82	40.9	40.7	40.51	39.75	40.21	40.47	40.24	39.66	38.44	39.97	38.53	31.64	29.43
2013-05-19	0						27.95	26.57	24.92	24.27	23.94	24.03	24.12	24.91	26.36	29.87	31.92	33.49	35.77	36.18	36.08	37.08	37.66	38.04	37.94	38.1	41.47	40.72	31.77	31.25
2013-05-20	0						27.25	24.9	24.42	23.99	24.17	25.31	30.28	34.05	37.27	39.01	41.62	44.03	51.58	54.89	57.54	59.52	65.6	61.5	55.5	49.09	58.36	47.82	37.45	32.4
2013-05-21	0						31.5	26.8	25.78	25.14	25.19	28.87	34.19	38.37	40.2	42.91	48.09	49.11	51.57	56.46	65.91	69.64	77.95	70.49	55.52	48.35	51.96	49.57	43.48	35.67
2013-05-22	0						34.2	31.3	28.15	27.12	27.71	32.56	36.75	39.62	41.73	43.34	50.27	53.54	55.64	62.16	68.03	70.66	74.4	69.38	55.3	50.74	55.09	52.65	39.69	34.95
2013-05-23	0						30.98	29.6	27.44	26.66	26.91	30.45	34.36	38.32	39.08	42.14	41.95	41.99	43.86	46.03	46.33	44.8	44.8	42.68	39.38	38.85	39.85	38.82	32.56	28.48
2013-05-24	0						28.48	27.5	26.47	25.6	26.48	28.05	34.16	39.57	43.67	42.88	47.25	44.76	42.57	41.88	41.04	38.93	37.72	36.86	36.58	34.97	37.07	36.52	32.36	28.15
2013-05-25	0						26.08	24.85	24.09	23.67	23.69	24.41	25.16	26.81	32.49	35.84	35.08	34.4	33.6	32.41	31.75	31.96	32	32.27	32.31	32.11	35.08	35.74	28.97	25.95
2013-05-26	0						24.5	23.28	22.99	21.74	20.94	20.89	20.88	23.09	25.94	27.77	29.53	29.81	29.76	29.83	28.93	29.62	30.25	30.52	31.37	30.86	34.71	35.66	29.47	26.36
2013-05-27	0						24.5	22.37	19.49	18.82	18.18	18.66	19.17	23.27	26.01	28.19	31.49	31.63	31.42	32.57	32.86	33.25	34.19	34.8	34.68	33.46	36.16	36.58	29.93	27.98
2013-05-28	0						25.02	24.07	23.27	22.27	22.77	23.95	27.45	31.88	33.88	35.63	35.99	37.77	38.83	42.92	43.96	46.89	48.65	47.79	46.34	41.82	45.38	45.25	31.86	29.83
2013-05-29	0						32.61	29.91	27.09	26.46	26.84	29.62	34.04	35.46	37.67	42.48	47.75	52.35	54.01	60.84	66.6	71.17	79.27	71.47	61.13	54.04	62.48	51.53	42.14	34.62
2013-05-30	0						33.54	28.05	26.28	24.59	24.8	27.31	33.51	38.98	41.55	47.4	48.53	57.14	60.15	75.12	85.59	98.06	109.19	94.9	76.53	57.4	58.56	48.95	43.4	35.85
2013-05-31	0						34.11	30.02	26.42	25.33	25.41	28.92	34.81	39.94	45.2	51.52	54.52	71.9	73.2	87.89	92.38	105.85	122.46	103.05	75.42	67.03	63.05	53.02	45.41	37.25
2007-06-01	0						47.67	37.44	33.37	31.1	30.99	37.26	50.61	66.02	72.35	77.81	89.93	96.36	101.67	108.8	118.14	124.32	127.07	113.55	101.49	90.88	89.44	86.79	71.82	59.61
2007-06-02	0						46.44	39.5	32.37	30.05	28.39	28.61	30.7	36.8	44.97	54.73	67.35	78.35	79.3	83.93	87.66	92.86	96.17	87.57	78.21	72.64	71.97	70.03	55.98	43.64
2007-06-03	0						41.78	32.81	29.23	26.04	24.21	23.89	24.39	27.5	36.46	41.7	49.4	54.79	58.15	58.68	59.25	60.11	60.95	58.21	56.42	52.23	53.83	53.69	46.56	34.83
2007-06-04	0						25.91	23.58	20.04	18.46	17.36	24.19	31.54	41.63	48.43	54.84	61.89	67.85	70.04	74.84	77.61	79.49	83.51	77.04	71.58	65.62	66.49	67.64	50.12	39.62
2007-06-05	0						28.1	24.14	21	19.11	19.47	25.67	32.6	40.37	46.92	52.22	62.9	72.27	70.62	77.55	82.26	81.59	83.81	74.49	66.4	60.81	62.04	62.08	44.44	34.06
2007-06-06	0						29.04	24.84	21.58	20.18	20.74	26.99	39.72	43.46	46.08	50.08	55.99	63.53	63.08	66.92	74.21	75.86	78.87	74.78	64.83	59.89	62.91	63.35	44.6	34.04
2007-06-07	0						31.49	27.78	25.11	24.3	24.35	29.39	44.61	51.66	56.66	61.84	68.28	74.99	80.95	86.61	93.54	97.34	104.16	102.11	88.28	78.97	80.48	81.4	67.84	51.15
2007-06-08	0						40.15	32.51	30.11	28.07	29.11	33.66	47.77	57.22	63.74	74.18	83.44	90.99	97.68	108.86	118.47	121.09	123.25	113.41	92.53	87.97	86.91	86.18	69.92	53.11
2007-06-09	0						53.09	46.33	39.67	35.9	33.92	34.24	37.42	40.92	45.51	57.2	68.9	78.32	79.16	82.48	81.98	83.28	85.39	80.92	72.7	65.16	63.21	63.86	47.88	38.33
2007-06-10	0						31.78	28.02	23.14	20.99	19.01	19.02	19.71	26.57	32.47	33.59	36.72	42.54	43.45	49.65	52.81	53.42	56.44	56.82	53.33	52.66	51.16	50.88	38.93	31.84
2007-06-11	0						27.15	25.23	24.02	22.79	23.25	25.46	28.83	35.96	41.12	47.09	59.5	69.26	70.69	76.37	82.82	87.31	92.57	86.38	75.37	71.47	70.09	68.37	46.43	36.03
2007-06-12	0						30.08	25.81	24.65	22.79	23.14	25.8	32.66	37.57	44.96	55.31	62.83	70.59	72.63	77.5	84.18	88.75	93.39	88.84	73.84	69.3	69.71	67.67	51.56	36.4
2007-06-13	0						31.81	29.11	26.48	24.08	24.78	29.39	35.76	41.07	46.44	53.42	59.29	70.2	71.47	75.26	79.33	81.9	84.75	80.88	71.41	66.91	66.32	64.89	51.24	33.83
2007-06-14	0						28.52	26.02	23.51	21.93	22.31	26.29	31.97	37.62	42.46	48.44	55.34	62.55	65.28	70.09	76.22	79.09	82.18	76.31	65.17	63.23	62.38	59.48	43.87	31.91
2007-06-15	0						26.84	24.71	22.61	20.02	20.76	24.84	29.26	34.44	39.99	47.68	62.22	67.27	68.29	69.1	74.54	77.74	80.25	77.17	66.87	64.49	64.43	64.65	44.88	31.24
2007-06-16	0						27.32	24.84	23.38	20.8	19.57	20.27	21.74	28.2	31.87	36.75	51.24	57.94	65.06	68.47	74.29	74.58	78.02	76.02	70.18	62.6	61.62	67.48	46.14	29.81
2007-06-17	0						27.22	25.07	21.86	18.23	17	16.73	17.28	26.17	28.83	32.71	46.88	60.68	69.11	78.63	79.51	90.32	97.21	96.99	82.78	78.6	77.84	76.69	59.36	41.78
2007-06-18	0						32.23	28.5	27.12	25.62	25.39	27.04	30.51	45.72	52.93	65.97	83.05	94.2	101.41	110.38	126.31	135.99	138.19	127.79	104.22	94.66	90.11	86.08	67.06	50.56
2007-06-19	0						41.27	34.4	32.47	31.23	31.28	32.56	40.42	48.24	53.98	69.08	75.6	93.49	99.67	110.48	125.06	137.36	148.28	129.66	106.6	92.17	89.19	84.21	62.92	50.88
2007-06-20	0						38.57	31.58	30	27.38	27.54	32.07	38.08	40.43	46.14	55.21	64.8	71.77	80.14	84.51	95.97	97.79	104.83	89.19	80.13	72.43	67.58	64.72	48.52	37.86
2007-06-21	0						30.89	26.89	24.1	21.7	22.73	27.28	31.99	33.94	37.3	42.37	50.69	61.66	69.56	73.67	82.62	87.99	94.3	85.07	72.98	68.74	66.42	62.68	46.93	37.73
2007-06-22	0						29.54	26.43	23.1	20.32	21.89	25.48	30.58	34.34	38.58	44.09	54.6	61.1	64.08	70.22	76.73	81.23	83.12	75.79	61.57	55.26	53.22	51.87	39.94	30.78
2007-06-23	0						25	22.12	17.97	15.35	12.62	14.55	15.74	24.73	28.2	30.55	36.57	41.61	45.06	47.17	49.41	50.4	53.44	53.92	48.26	42.93	38.92	37.49	30.4	24.75
2007-06-24	0						21.82	18.62	17.15	11.44	9.4	9.83	9.97	21.72	26.4	29.77	35.11	42.12	51.21	60.31	64.19	67.77	75.32	81.26	65.2	64.81	62.02	64.27	42.22	32.34
2007-06-25	0						28.26	27.05	25.7	23.34	24.33	26.35	29.64	38.87	43.86	53.49	66.25	78.03	80.4	91.73	99.75	106.77	112.02	103.95	88.84	76.03	73.93	75.72	59.94	43.64
2007-06-26	0						37.03	33.94	30.77	28.62	29.09	32.67	38.5	41.87	48.3	60.02	70.21	80.25	86.69	98.56	107.27	115.39	120.24	110.29	94.46	80.82	77.44	76.96	63.08	51.15
2007-06-27	0						46.06	40.07	36.53	33.77	34.23	37.53	44.61	56.14	67.41	76.11	89.05	102.21	104.74	119.34	128.06	137.84	137.75	123.78	110.47	104.47	100.77	98.9	74.55	55.5
2007-06-28	0						55.1	48.73	43.69	39.58	40.46	43.45	52.52	57.03	66.48	73.98	83.82	89.69	97.76	104.23	109.76	111.27	109.96	102.72	87.95	78.47	79.4	75.29	59.71	50.56
2007-06-29	0						41.12	34.4	30.8	29.02	29.34	31.13	38.64	40.56	43.19	48.63	58.93	62.04	67.6	68.95	71.87	72.07	72.76	64.4	56.74	52.01	49.71	45.92	37.05	32.6
2007-06-30	0						29.83	27.26	24.23	22.35	21.35	20.86	22.7	27.67	31.68	37.73	42.67	58.08	59.73	59.44	60.09	66.3	67.33	66.62	61.89	58.57	54.56	53.08	37.35	30.77
2007-07-01	0						28.99	28.39	25.08	21.32	19.04	19.17	18.21	25.5	29.64	33.58	38.27	43.26	46.74	51.48	55.35	57.87	61.8	62.29	57.98	53.59	53.68	50.84	36.99	30.74
2007-07-02	0						26.84	25.19	20.95	19.36	20.32	25.59	29.87	36.44	38.63	45.78	49.39	55.56	61.43	65.1	67.63	72.56	84.12	79.06	66.94	62.15	56.6	57.67	43.09	31.1
2007-07-03	0						27.16	24.39	20.31	17.82	19.11	23.35	28.58	31.04	32.87	36.5	44.7	49.69	53.25	58.59	62.8	66.59	69.38	69.2	59.02	52.55	51.88	51.14	37.57	34.66
2007-07-04	0						28.85	26.29	24.34	21.26	19.78	21.19	21.5	23.08	27.89	31.65	36.7	43.82	48.84	52.54	56.46	59.31	64.95	63.92	57.42	52.67	52.46	48.75	37.92	36.8
2007-07-05	0						33.44	30.79	28.27	26.77	27.06	29.89	35.61	46.74	47.32	57.56	70.54	74.49	74.94	81.25	91.31	103.69	100.37	93.13	78.23	74.89	73.05	69.58	54.61	41.35
2007-07-06	0						32.99	29.64	27.17	26.16	25.89	28.03	32.65	38.47	42.4	53.39	63.75	68.96	74.23	79.25	88.78	95.06	96.71	86.72	73.52	67.6	64.22	63.17	51.43	41.17
2007-07-07	0						35.06	32.04	28.31	26.16	25.4	25.57	25.87	31.83	37.46	46.99	60.14	66.6	72.73	77.61	82.16	91.22	95.56	91.33	78.78	71.99	69.02	67.57	54.39	42.75
2007-07-08	0						37.31	34.03	30.4	26.92	25.45	24.45	23.78	29.46	36.45	45.01	60.65	71.8	81.42	88.53	99.36	104	110.34	106.13	95.64	88.65	80.38	75.77	66.17	53.54
2007-07-09	0						45.22	38.56	33.72	32.26	31.54	33.1	40.4	52.32	65.13	77.97	96.05	112.34	122.79	138.71	149.62	166.13	172.96	154.94	132.92	116.89	113.66	104.1	83.95	58.33
2007-07-10	0						60.14	49.03	42.44	39.03	38.46	41.01	47.84	61.28	75.8	88.94	103.71	120.95	127.3	147.83	168.49	186.32	188.53	166.47	134.36	117.48	115.53	105.77	86.42	68.98
2007-07-11	0						52.97	43.98	38.13	35.06	35.2	37.92	46.75	54.24	64.75	70.21	81.24	89.65	97.42	111.85	119.83	121.68	122.39	112.05	92.77	82.84	81.46	75.36	60.23	46.93
2007-07-12	0						32.49	29.75	27.34	25.68	25.78	28.64	31.41	38.46	43.32	48.9	57.8	65.21	67	72.93	75.98	80.84	83.24	77.01	67.27	61.92	58.92	60.02	42.35	33.66
2007-07-13	0						31.06	28.02	24.97	22.61	23.26	26.24	31.19	37.14	41.04	48.48	57.34	62.23	66.17	69.93	74.83	75.33	74.29	69.25	62.17	55.33	53.64	53.51	39.32	31.71
2007-07-14	0						33.19	30.52	27.98	24.8	23.52	23.77	24.76	31.23	37.07	43.06	53.91	63.52	66.1	70.1	71.91	79.55	82.99	78.5	69.17	63.98	63.8	63.91	50.27	38.38
2007-07-15	0						32.59	30.15	27.83	25.35	22.75	22.59	20.72	27.98	32.7	41.4	49.09	58.26	66.57	69.77	71.87	78.16	82.18	78.85	71.33	67.23	65.58	66.44	48.53	39.99
2007-07-16	0						33.33	30.41	28.16	26.29	26.52	29.36	34.11	40.74	47.38	58.67	66.57	76.37	82.1	88.12	96.5	102.09	105.1	96.19	83.77	74.53	71.83	70.11	56.13	44.3
2007-07-17	0						38.18	32.53	29.56	27.35	27.38	31.19	36.96	41.07	45.94	56.22	68.51	74.56	81.15	86.8	96.11	101.17	103.27	93.23	81.49	71.99	70.53	68.48	55.17	45.12
2007-07-18	0						38.19	33.21	31.72	29.74	29.39	31.95	37.37	42.2	47.65	61.9	71.23	79.12	82.84	89.66	98.91	104.3	107.1	96.98	83.9	74.08	75.43	70.25	56.36	46.82
2007-07-19	0						41.28	35.7	31.9	30.29	30.5	33.52	41.2	44.82	52.92	63.41	72.22	82.11	84.83	93.65	102.92	108.64	108.71	99.64	84.76	78.13	79.97	73.63	54.68	48.91
2007-07-20	0						42.59	37.16	33.61	31.44	31.73	34.99	41.47	41.83	47.51	55.49	63.52	68.36	71.81	76.73	84.55	87.55	86.68	75.75	69.47	61.18	57.63	55.05	40.72	37.53
2007-07-21	0						30.78	26.46	24.7	23.11	21.8	21.57	20.77	25.04	30.55	35.64	41.46	47.75	52.25	55.75	57.45	60.18	62.84	59.22	53.81	47.64	48.56	45.13	36	27.97
2007-07-22	0						26.28	23.38	21.06	18.03	16.51	14.28	14.57	21.43	26.69	31.14	35.3	38.56	42.22	48.69	51.99	57.65	59.99	58.35	51.04	49.06	45.87	46.35	36.7	30.14
2007-07-23	0						26.21	24.41	21.98	21.12	21.64	24.13	26.86	32.03	36.28	43.94	51.07	58.55	63.94	65.69	72.17	77.01	78.37	73.26	65	60.16	58.37	57.58	40.54	30.27
2007-07-24	0						25.26	22.03	18.41	15.45	17.68	22.71	27.09	33.73	36.32	42.55	49.26	57.14	60.06	65.17	70.89	75.54	78.07	72.52	64.4	59.73	59.26	58.67	41.8	31.57
2007-07-25	0						27.53	24.91	21.93	18.87	19.89	24.99	29.04	32.91	35.65	41.6	48.26	57.45	59.85	62.19	68.27	70.52	72.88	67.67	59.33	55.15	55.49	51.38	38.94	32.61
2007-07-26	0						32.04	29.05	25.75	23.58	24.46	27.96	32.1	36.93	39.9	48.22	55.55	62.03	65.4	71.38	81.57	84.65	88.01	79.42	67.91	60.74	63.71	62.91	46.9	38.46
2007-07-27	0						33.74	31.08	27.79	26.1	26.17	29.48	33.66	39	43.14	53.22	59.06	65.47	69.26	77.59	85.7	87.06	87.75	79.12	65.15	57.5	63.21	59.08	41.87	35.46
2007-07-28	0						36.19	31.99	29.25	27.11	26.25	26.48	27.44	31.67	35.72	43.74	52.15	59.15	67.5	69.67	76.99	77.96	78.11	74.5	64.23	57.15	58.65	56.32	42.16	36.41
2007-07-29	0						33.86	32.12	29.45	26.36	25.1	24.38	24.64	28.67	33.69	39.92	46.74	53.68	59.58	64.11	69.53	75.43	78.32	74.82	66.95	61.12	59.62	58.98	46.65	37.53
2007-07-30	0						33.09	30.7	27.97	26.23	26.2	29.12	34.52	40.62	44.42	54.48	61.5	67.46	71.22	75.91	85.08	90.64	93.6	87.23	74.61	66.73	67.1	63.86	49	40.83
2007-07-31	0						36.55	33.32	28.99	26.92	26.63	30.39	35.39	45.74	49.42	58.71	71.86	82.46	89.87	98.33	106.87	111.7	117.85	106.66	95.27	83.83	84.9	79.18	60.43	49.16
2007-08-01	0						43.42	35.32	31.33	29.39	29.17	33.28	38.13	45.51	53.14	65.12	77.96	89.28	98.86	111.02	120.48	127.36	134.6	124.7	107.96	94.49	96.63	88.6	70.37	56.15
2007-08-02	0						43.9	35.26	30.49	27.85	27.67	31.88	37.61	48.78	59.14	72.77	85.48	97.35	106.13	116.69	128.9	139	143.87	131.63	113.09	103.26	101.8	95.47	75.48	58.11
2007-08-03	0						50.81	38.66	33.27	30.39	30.02	34.47	42.95	53.77	66.73	79.71	93.09	104.25	116.09	127.03	138.96	145.87	149.02	132.5	116.15	102.27	99.57	94.63	73.51	57.31
2007-08-04	0						47.95	38.69	33.46	30.31	29.14	29.8	31.51	36.26	44.84	62.68	76.8	84.75	94.21	104.17	113.75	119.63	124.27	111.09	101.81	88.57	85.06	79.44	65.14	46.77
2007-08-05	0						42.25	34.87	31.1	27.76	26.11	25.51	24	28.05	34.74	43.74	54.22	65.98	71.48	78.34	80.64	83.16	87.72	85	80.52	69.44	70.21	66.2	53.76	42.29
2007-08-06	0						38.94	34.25	32.25	30.36	30.89	33.63	42.22	50.96	58.22	67.75	83.12	92.94	100.59	108.05	114.04	122.01	126.35	117.9	111	98.07	98.6	91.32	72.31	57.43
2007-08-07	0						53.1	39.69	35.29	32.59	32.51	36.65	48.19	61.94	72.94	83.45	101.96	115.95	124.2	135.45	151.91	160.88	166.88	153.44	132.1	119.44	121.42	109.51	84.46	68.73
2007-08-08	0						70.25	58.98	47.92	42.33	42	48.94	58.93	68.47	78.24	98.04	115.4	130.76	146.57	170.11	184.8	194.24	204.03	188.07	154.9	133.9	133.06	122.21	91.68	81.39
2007-08-09	0						75.21	64.03	51.57	45.14	44.11	49.76	68.21	67.4	81.51	93.21	109.19	118.82	132.69	153.14	167	170.38	179.74	161.56	132.84	119.51	120.61	107.18	85.19	77.66
2007-08-10	0						59.66	49.56	39.86	35.81	35.49	42.26	51.97	52.92	68.35	73.85	83.02	90.23	93.27	105.95	112.79	112.12	110.43	97.09	88.87	79.79	78.74	73.98	62.05	53.05
2007-08-11	0						44.28	37.58	33.09	29.9	28.62	28.01	28.63	30.89	39	53.1	61.88	72	77.1	81.76	84.31	91.86	97.93	91.54	80.82	73.92	73.27	67.24	54.35	41.46
2007-08-12	0						36.97	32.21	28.02	24.11	23.44	22.67	23.45	26.52	34.12	48.34	60.32	72.59	81.77	93.75	102.69	107.12	117.36	115.26	104.77	93.58	92.98	88.48	68.64	56.56
2007-08-13	0						45.88	35.01	32.29	29.67	29.69	33.75	45.39	48.23	57.57	67.79	84.23	93.5	97.21	105.99	119.1	126.2	124.78	114.27	99.42	90.21	87.99	83.5	63.07	56.07
2007-08-14	0						40.66	33.75	29.91	27	27.06	30.62	38.33	39.84	46.67	58.25	68.18	77.24	86.1	95.08	101.21	108.38	111.82	109.02	95.24	86.46	83.98	79.47	62.13	54.84
2007-08-15	0						37.13	33.19	28.65	26.99	27.01	30.68	38.76	44.43	49.92	60.84	73.2	86.93	93	99.61	107.42	117.84	124.16	118.74	101.55	91.17	93.11	81.15	61.8	57.91
2007-08-16	0						53.01	40.34	33.32	31.09	31.48	36.69	48.85	54.75	63.84	72.44	82.84	95.45	103.85	114.19	125.34	137.38	144.35	132.5	109.03	99.34	100.71	89	72.92	66.65
2007-08-17	0						60.56	49.08	40.33	35.52	35.26	45.19	54.33	56.81	62.6	68.35	76.16	83.87	90.7	100.79	106.51	110.45	106.42	96.9	84.69	73.56	73.79	68.72	57.24	53.25
2007-08-18	0						46.07	39.45	32.71	29.76	28.62	28.62	28.3	31.37	40.49	48.21	56.07	63.68	69.24	71.02	70.55	72.81	79.26	77.28	70.59	57.77	59.08	54.51	44.7	35.83
2007-08-19	0						30.49	27.55	24.18	22.43	21.15	21.05	21.18	24.44	28.44	34.41	40.3	46.17	52.13	55.86	64.1	66.23	70.3	71.18	70.63	62.58	68.15	62.53	45.31	37.87
2007-08-20	0						31.08	29.19	26.26	24.56	26.34	30.33	39.07	43.24	46.77	53.1	58.08	63.44	72.66	75.12	78.97	79.59	81.64	79.06	75	68.49	70.6	64.18	54.7	40.63
2007-08-21	0						35.01	32.35	28.66	26.8	27.65	32.77	43.69	50.06	53.05	57.83	64.44	69.91	74.52	78.84	80.7	84.7	88.13	82.55	76.99	72.22	75.01	69.62	57.67	47.28
2007-08-22	0						34.16	28.81	26.1	24.89	25.66	29.98	40.29	42.2	44.61	47.02	52.23	60.82	65.62	70.21	71.16	75.11	77.86	78.46	70.48	66.03	70.73	63.12	47.3	44.88
2007-08-23	0						37.47	32.69	28.04	26.18	26.75	34.38	44.03	44.48	48.52	52.36	65.33	70.79	73.9	80.05	86.17	92.05	97.98	89.6	82.87	77.86	81.01	76.02	60.32	53.33
2007-08-24	0						43.47	35.95	30.67	28.62	29.22	35.51	45.42	50.78	55.78	68.3	80.48	87.02	91.94	96.25	106.42	114.1	118.45	109.14	93.58	88.3	90.42	85	69.83	53.51
2007-08-25	0						47.35	40.47	34.41	30.92	29.67	30.17	31.36	35.08	45.94	61.9	74.72	82.85	87.97	94.83	104.17	110	113.5	101.35	88.37	82.45	84.45	79.57	64.73	51.12
2007-08-26	0						45.92	40.78	33.91	31.9	30.01	29.6	30.56	32.75	41.93	49.07	61.21	66.64	74.1	76.82	78.81	81.95	86.39	83.09	77.92	70.26	74.32	69.87	54.4	43.9
2007-08-27	0						33.62	29.9	26.56	24.81	25.48	29.77	35.65	39.85	43.99	49.21	57.37	63.6	68.9	78.8	79.69	84.92	90.41	85.12	75.49	66.89	74.38	59.89	46.82	39.68
2007-08-28	0						34.13	30.4	26.3	24.99	25.56	29.18	35.76	40.67	43.64	47.77	58.7	65.01	70.36	77.27	81.65	88.08	94.63	91.3	74.33	66.5	76.52	65.52	54.59	44.57
2007-08-29	0						38.51	33.24	28.58	26.95	27.47	32.82	40.03	42.22	45.35	50.18	61.46	67.37	70.98	77.46	84.29	93.06	98.68	91.93	76.98	67.59	75.49	68.04	53.06	45.02
2007-08-30	0						42.03	36.36	30.73	28.93	29.07	33.73	42.2	45.24	49.02	54.03	64.29	70.85	74.15	80.41	89.24	99.86	106.42	93.9	77.97	69.2	76.38	67.18	54.17	42.71
2007-08-31	0						36.4	31.85	28.38	27.15	27.44	31.85	39.74	38.67	43.14	48.22	50.64	57.4	59.84	64.9	69.35	71.23	72.41	67.12	58.03	52.36	56.8	50.13	38.16	34.18
2007-09-01	0						31.74	29.82	26.66	23.97	22.84	23.25	24.86	27.06	31.21	35.68	37.38	43.53	46.9	47.08	50.45	56.8	57.59	57.77	47.28	42.88	46.21	41.94	33.88	28.06
2007-09-02	0						24.56	23.08	19.84	17.07	15.19	14.43	15.78	19.57	24.5	28.38	30.12	33.65	38.15	40.42	47.16	49.88	56.89	57.88	46.4	43.13	48.97	45.38	33.44	28.82
2007-09-03	0						24.58	22.52	18.67	15.32	14.38	13.15	13.81	19.78	25.14	28.91	34.53	40.44	47.13	52.8	57.15	60.3	70.14	70.53	61.48	57.73	59.36	53.7	42.98	34.52
2007-09-04	0						29.32	25.96	24.46	23.66	24.3	27.69	35.37	39.57	44.37	50.53	56.23	62.79	67.65	74.99	80.32	87.81	97.94	89.05	72.57	70.46	70.02	60.44	50.89	41.54
2007-09-05	0						32.42	28.03	25.37	24.41	25.16	29.92	37.15	42.37	46.8	50.02	58.04	64.29	68.79	78.41	82.55	90.15	95.15	87.17	75.64	72.68	74.93	60.33	47.73	36.54
2007-09-06	0						32.66	28.58	26.26	25.25	26.22	31.31	41.21	41.24	45.47	51.05	58.16	66.59	69.1	76.56	84.11	91.76	94.44	86.17	74.66	71.89	71.29	59.14	48.78	38.42
2007-09-07	0						34.99	30.96	26.58	25.61	26.83	33.05	43.76	45.6	45.02	53.16	61.58	74.23	74.82	83.9	90.71	100.56	101.1	86.63	74.54	71.04	71.03	60.97	47.48	36.76
2007-09-08	0						38.04	34.84	30.55	27.31	26.07	26.86	29.32	32.45	38.19	44.34	53.37	64.11	69.49	71.89	78.83	83.21	86.28	79.21	70.71	65.13	65.21	57.15	45.77	35.48
2007-09-09	0						36.49	34.09	28.93	24.98	22.26	22.56	24.86	29.31	34.56	38.98	44.72	52.46	63.37	66.07	66.51	73.79	80.79	79.32	66.8	64.8	65.96	62.14	43.21	36.52
2007-09-10	0						37.34	33.07	30.1	28.19	29.16	34.47	43.54	47.42	49.25	57.51	62.65	70.98	75.3	85.65	91.8	97.98	101.14	91.85	76.7	72.33	73.79	62.92	51.38	39.57
2007-09-11	0						43.35	38.3	33.12	30.22	32.27	39.32	50.91	49.35	49.46	54.37	64.83	68.48	72.46	81.79	85.53	87.18	87.94	83.24	69.59	72.72	69.76	57.98	44.99	38.64
2007-09-12	0						32.28	28.34	25.27	24.65	25.16	32.06	44.22	43.88	41.01	45.02	50.66	54.19	56.06	60.75	62.6	66.44	66.34	59.98	52.98	57.99	57.4	45.73	34.8	29.97
2007-09-13	0						26.56	24.32	23.2	22.28	23.28	27.2	38.48	38.5	37.61	41.68	46.15	48.38	52.58	57.08	61.23	66.46	66.26	61.54	54.58	58.66	58.15	48.09	37.17	30.19
2007-09-14	0						27.48	23.91	22.5	20.9	22.51	26.28	36.86	36.35	38.19	40.87	47.13	52.54	54.02	58.1	63.06	62.76	62.54	55.82	48.12	51	53.64	47.11	38.35	30.59
2007-09-15	0						31.24	27.92	26.24	24.77	24.57	25.69	27.24	29.56	36.53	43.9	49.74	52.49	51.95	51.82	51.52	50.1	50.89	49.03	44.5	47.4	53.12	41.76	32.72	26.51
2007-09-16	0						26.14	24.79	22.73	20.6	19.65	20	22.3	24.77	28.32	31.34	34.6	38.35	38.53	39.19	38.85	39.62	42.13	42.26	41.95	48.67	56.49	45.2	32.56	27.14
2007-09-17	0						24.97	22.95	20.68	19.34	22.47	27.77	40.83	42.34	43.45	46.8	50.72	52.12	54.29	59.52	59.88	59.74	60.8	60.33	53.57	59.61	61.92	50.7	35.51	29.15
2007-09-18	0						24.33	21.67	19.47	18.29	20.18	26.67	39.67	40.12	41.91	44.52	48.18	49.71	50.96	56.31	59.3	58.9	59.02	58.63	50.57	59.22	59.44	51.39	35.81	27.35
2007-09-19	0						25.22	22.67	20.65	20.14	22.12	28.83	42.43	42.77	42.9	46.26	50.66	53.44	55.45	61.75	66.88	65.54	68.57	65.44	60.37	66.33	64.83	53.49	39.48	30.02
2007-09-20	0						27.19	24.6	22.83	22.08	23.56	29.99	45.83	43.65	43.21	47.13	50.35	56.64	60.02	68.37	68.26	73.35	74.78	71.89	62.88	71.14	66.37	56.48	46.52	33
2007-09-21	0						30.58	26.28	23.67	22.81	24.08	31.17	47.03	42.05	43.57	47.97	52.95	60.31	64.16	71.29	74.25	80.38	80.86	74.74	67.94	71.99	69.24	57.29	47.12	38.47
2007-09-22	0						32.71	29.8	27.1	25.29	24.7	26.16	29.31	33.16	37.57	46.05	52.01	57.77	61.22	67.9	70.18	73.36	76.53	71.12	63.56	69.03	65.99	54.19	45.21	35.23
2007-09-23	0						32.58	28.76	25.43	22.24	19.53	21.26	23.86	27.41	31.71	37.63	43.56	48.25	52.44	55.9	59.69	62.57	64.45	66.29	58.51	64.89	66.88	57.21	41.56	32.31
2007-09-24	0						31.95	28.74	25.6	25.04	26.24	32.11	50.1	46.92	47.09	50.99	57.21	63.84	70.28	76.97	81.03	88.99	92.78	87.17	72.21	77.03	73.53	65.38	48.01	38.94
2007-09-25	0						34.67	29.68	27.02	26.17	26.79	33.65	53.49	51.37	51.06	57.04	66.02	71.34	77.67	87.27	97.35	105.95	108.88	103.4	83.63	84.78	82.96	70.78	55.15	41.5
2007-09-26	0						37.28	32.21	28.48	27.03	27.98	36.25	60.45	58.7	60.7	63.61	74.3	81.35	86.21	96	104.61	114.82	117.27	105.46	86.03	88.5	89.52	77.46	59.19	44.9
2007-09-27	0						42.61	34.78	30.24	28.79	29.77	38.4	62.07	60.19	59.24	61.5	69.81	76.6	81.72	89.83	94.66	99.71	100.06	86.36	74.2	82.7	83.83	68.1	49.43	41.58
2007-09-28	0						43.64	36.19	31.94	31.28	31.73	41.17	62.44	63.04	62.2	64.16	69.89	76.83	74.31	81.21	80.99	82.26	79.86	72.76	62.14	69.71	67.52	58.98	42.81	35.31
2007-09-29	0						30.89	28.23	26.07	24.29	23.6	24.01	26.74	28.72	35.96	42.09	46.25	47.06	48.43	48.54	48.82	49.37	49.23	48.1	45.17	51.04	53.32	43.3	34.82	28.88
2007-09-30	0						26.08	23.64	21.59	19.61	18.33	19.11	22.08	25.13	28.56	31.7	36.05	38.78	42.57	40.51	43.68	47.73	47.34	47.74	50.97	60.93	68.94	53.88	37.04	28.17
2007-10-01	0						27.73	24.85	23.78	23.51	23.81	31.4	45.06	44.9	43.79	47.06	51.79	58.72	55.17	64.85	62.39	61.49	63.54	62.8	56.55	67.49	65.35	49.66	38.18	32.9
2007-10-02	0						26.51	25.18	23.39	23.24	24.28	28.24	46.78	51.35	47.17	49.65	58.25	63.05	62.05	69.85	68.57	69.66	70.99	66.52	63.06	75.8	67.86	52.74	41.45	31.45
2007-10-03	0						30.33	27.61	25.65	25.44	25.86	32.58	53.88	57.1	58.11	57.31	67.76	72.67	75.25	85.03	84.28	88.2	88.74	83.64	77.27	90.55	84.07	67.83	51.37	35.58
2007-10-04	0						35.74	29.78	27.28	26.39	26.76	35.17	67	67.78	67.56	75.43	84.61	93.43	95.38	111.85	116.29	126.57	126.05	117.11	101.71	111.75	111.26	85.07	70.36	49.56
2007-10-05	0						45.26	37.62	32.8	31.16	32.02	39.91	67.65	67.54	71.45	79.11	85.12	95.87	100.95	114.06	123.92	126.34	126.57	116.45	100.81	106.96	94.46	70.8	68.12	55.25
2007-10-06	0						45.49	38.11	33.9	30.44	29.7	31.3	35.72	41.82	51.31	65.73	75.18	82.18	90.15	99.08	106.05	113.07	115.45	105.86	91.21	97.03	90.48	79.63	64.83	50.18
2007-10-07	0						44.43	38.14	33.12	30.69	28.52	30.06	33.55	37.38	45.17	56.4	69.49	79.17	86.27	95.46	105.45	110.45	116.96	112.59	100.54	109.04	102.38	89.34	70.37	59.38
2007-10-08	0						39.61	33.21	29.65	28.4	28.83	36.09	63.72	68.34	74.59	84.44	96.4	107.22	108.47	121.93	127.28	138.39	142.71	127.88	111.6	128.25	113.82	98.11	82.97	65.23
2007-10-09	0						46.41	37.3	32.92	30.81	31.26	40.99	70.82	83.91	70.15	76.79	93.48	95.9	104.09	122.11	130.79	143.11	135.35	125.62	103.61	115.24	99.02	83.59	73.12	57.04
2007-10-10	0						40.84	34.44	30.97	28.21	29.69	40.63	69.69	66.76	60.19	62.55	75.95	75.8	72.18	81.85	78.99	77.52	78.19	75.53	70.77	84.77	74.77	58.87	41.82	35.71
2007-10-11	0						34.4	30.46	27.24	26.84	27.5	39.65	65.6	64.29	57.42	56.55	63.89	63.2	61.35	64.21	58.64	57.59	59.43	59.47	61.36	80.58	68.26	52.97	39.16	34.7
2007-10-12	0						29.29	26.6	25.36	25.19	26.01	36.64	66.62	68.66	62.36	62.09	63.25	63.64	55.3	60.51	52.85	52.81	52.98	51.76	58.45	69.25	63.45	55.59	40.28	36.18
2007-10-13	0						34.39	31.71	29.49	28.05	27.85	30.96	36.83	41.68	50.04	55.64	55.09	53.82	53.44	49.92	45.44	43.53	46.93	49.87	52.35	60.7	57.03	54.17	39.93	33.79
2007-10-14	0						31.6	30.56	27.66	27.09	26.97	28.32	31.12	34.61	40.43	47.43	49.72	48.54	46.72	44.51	43.34	43.68	47.34	49.53	57.34	69.47	66.86	53.19	38.51	33.19
2007-10-15	0						26.59	25.09	24.5	24.52	25.15	36.56	57.51	62.5	57.96	60.06	67.33	65.06	62.19	68.31	65.13	63.07	63.25	61.78	62.25	72.59	67.61	56.89	44.37	32.52
2007-10-16	0						29.53	26.88	25.22	25.24	25.46	33.97	53.57	64.97	55.59	57.11	65.15	64.91	62.28	65.71	66.29	64.85	65.34	64.89	66.77	77.51	69	58.88	49.13	32.15
2007-10-17	0						30.74	28.54	27.43	27.13	27.46	38.18	63.62	67.31	59.93	65.28	67.13	74.96	72.11	78.3	74.44	73.78	75.09	72.38	73.26	91.95	78.58	67.24	52.62	35.52
2007-10-18	0						31.72	29.36	27.5	26.8	27.51	36.21	60.21	64.38	59.6	61.46	68.88	72.26	71.43	74.81	73.57	72.65	73.02	67.8	70.47	85.06	72.71	61.84	51.43	37.86
2007-10-19	0						35.97	32.52	29.28	28.28	29.85	38.42	60.56	61.76	62.89	67.86	71.53	71.77	69.89	73.44	70.62	66.21	64.59	60.75	63.67	72.84	65.98	57.54	45.16	37.88
2007-10-20	0						38.96	35.55	31.32	29.4	28.97	31.59	36.51	41.5	49.59	59.63	65.51	65.27	64.65	62.46	57.28	56.8	57.38	56.81	64.07	67.83	65.77	58.9	44.46	35.12
2007-10-21	0						35.54	31.34	28.52	27.55	27.1	28.07	31.04	34.01	37.01	40.78	47.32	51.36	54.09	54.92	54.51	56.81	61.39	62.98	70.67	80.83	73.17	60.99	47.13	36.36
2007-10-22	0						29.72	27.57	26.76	26.7	26.92	35.09	57.49	58.27	58.29	61.74	69.15	70.75	69.64	74.27	70.54	70.97	71.87	69.47	73.66	90.36	75.27	62.13	52.45	40.03
2007-10-23	0						32.4	28.96	26.85	26.62	27.34	36.38	61.81	61.97	60.64	62.3	63.95	64.51	61.89	64.08	61.59	59.63	59.37	59.45	64.47	81.98	66.36	57.95	44.06	38.47
2007-10-24	0						40.7	36.11	33.01	32.19	33.79	46.1	68.93	68.34	66.53	67.64	68.33	70.86	64.6	69.18	59.92	57.14	59.15	59.62	70	82.95	67.68	56.55	48.99	43.09
2007-10-25	0						37.9	33.39	30.8	29.78	31.37	41.25	64.58	66.84	61.35	63.9	63.42	61.9	57.45	60.98	54.99	53.49	53.74	55.33	69.16	78.8	65.99	55.73	48.22	42.15
2007-10-26	0						32.88	28.44	26.86	26.77	27.44	37.11	59.73	62.57	60	61	61.85	61.54	59.13	59.15	53.78	49.88	49.36	51.71	60.23	71.39	59.13	51.08	41.02	34.67
2007-10-27	0						34.13	31.72	28.43	27.35	27.11	30.36	34.64	39.95	48.51	56.72	61.94	59.69	52.92	51.21	47.08	45.25	46.33	48.42	59.94	68.74	58.67	49.58	40.79	32.3
2007-10-28	0						30.69	28.87	27.93	27.02	26.81	27.57	29.64	32.47	37.75	43.25	46.55	46.09	44.79	42.46	39.27	39.35	40.8	46.45	64.32	70.93	64.31	55.73	40.96	34.2
2007-10-29	0						34.34	33.66	32.7	33.11	34.66	48.75	69	75.22	73.59	70.57	70.46	67.56	62.26	63.29	56.18	53.18	55.35	58.16	72.89	85.67	72.81	64.85	51.9	46.5
2007-10-30	0						41.64	39.27	36.95	37.81	40.09	57.63	78.84	87.1	76.49	72.18	74.28	69.2	62.79	63.75	59	55.04	56.15	61.94	73.55	83.6	73.06	63.8	53.73	42.96
2007-10-31	0						39.61	36.22	34.29	33.29	35.15	52.24	80.17	83.75	76.5	69.43	72.9	68.81	61.83	61.46	54.58	53.34	53.45	59.72	75.35	88.27	77.09	62.63	49.36	38.95
2007-11-01	0						32.56	29.9	28.28	27.84	28.04	38.28	61.2	64.59	64.66	65.12	65.76	62.05	58.02	62.56	53.48	51.04	52.76	58.67	69.75	83.62	71.61	56.63	46.39	37.59
2007-11-02	0						35	32.05	30.61	30.75	33.52	43.08	69.6	75.29	73.94	66.31	66.67	66.37	62.22	62.62	55.48	49.33	49.43	52.01	65.07	74.79	68.39	55.46	48	39.22
2007-11-03	0						35.08	32.27	30.32	30.54	30.38	31.46	37.13	48.75	58.83	63.5	61.07	52.19	42.77	39.8	35.5	33.87	35.8	41.26	53.36	64.07	55.52	45.08	37.37	31.02
2007-11-04	0						33.36	33.5	31.07	30.71	30.33	31.91	34.63	40.25	51.41	54.08	51.06	48.33	42.15	39.48	36.89	37.09	39.42	61.96	68.92	71.95	66.16	54.02	41.66	35.95
2007-11-05	0						34.25	32.57	32.51	32.33	34.85	46.84	70.93	76.02	74.22	71.79	70.33	69.93	65.38	65.1	59.61	59.08	57.86	79.09	84.31	77.61	74.88	61.87	47.66	41.53
2007-11-06	0						35.38	31.77	30.31	29.9	32.57	46.73	72.04	77.03	73.15	72.17	72.78	70.33	63.93	66.24	61.37	59.46	64.68	86.01	92.02	87.67	84.4	73.49	62.88	47.76
2007-11-07	0						40.7	37.83	35.98	36.23	38.61	52.06	79.19	90.87	81.33	79.15	79.86	76.25	65.05	67.67	60.54	57.5	64.55	87.35	99.32	92.91	82.13	74.62	64.4	47.05
2007-11-08	0						50.49	46.99	45.89	47.13	50.38	65.51	96.49	91.53	81.78	77.34	76.32	70.76	64.99	65.09	59.04	53.53	63.42	82.33	96.37	84.46	77.7	73.94	62.67	57.67
2007-11-09	0						47.2	43.96	42.97	43.91	51.61	59.87	81.06	93.05	83.85	81.58	75.86	70.19	64.17	63.15	54.99	50.72	60.19	84.05	91.12	82.25	74.19	64.89	55.83	44.28
2007-11-10	0						40.97	40.17	37.63	36.61	38.03	40.51	46.23	55.62	67.56	71.55	70.43	62.64	52.54	46.97	42.31	41.76	48.35	70.77	78.13	70.69	62.81	56.33	46.2	39.08
2007-11-11	0						34.88	34.44	33.07	32.79	33.07	34.98	36.96	41	46.45	47.86	46.37	42.86	37.9	37.54	35.39	36.34	40.98	66.88	67.77	68.74	64.62	50.93	40.27	34.24
2007-11-12	0						34.56	33.74	32.72	32.99	35.16	44.7	62.89	74.84	73.47	71.56	67	64.87	58.13	58.65	51.58	50.03	58.58	81.5	88.57	76.12	69.47	57.51	47.31	35.42
2007-11-13	0						28.76	27.35	26.42	26.13	27.23	32.3	50.62	59.1	57.19	56.01	59.36	57.64	53.26	55.54	49.18	47.84	54.65	76.35	83.04	68.61	60.46	53.13	40.36	33.87
2007-11-14	0						31.79	30.07	28.76	28.27	30.2	38.06	56.54	62.98	60.66	60.37	63.17	62.23	58.47	60.43	54.44	51.22	61.25	79.87	82.7	69.8	68.77	57.54	42.03	33.31
2007-11-15	0						31.91	30.53	30.18	30.23	30.38	40.18	63.13	65.65	65.57	68.83	72.93	71.27	65.61	68.52	61.71	61.5	69.92	98.2	102.49	90.31	82.63	71.23	58.33	47.92
2007-11-16	0						44.89	41.61	41.18	41.53	44.29	58.53	81.6	87.78	81.69	79.36	76.56	72.86	63.8	66.38	59.2	57.88	65.86	96.2	97.55	83.89	80.44	71.61	64.5	56.06
2007-11-17	0						52.78	49.96	47.34	47.42	47.49	53.46	58.65	66.7	71.87	73.87	71.66	64.73	56.12	53.03	46.6	45.33	55.56	81.29	82.17	74.94	69.1	61.37	57.77	47.37
2007-11-18	0						41.77	43.25	40.05	38.81	38.92	41.01	42.74	47.28	52.38	55.58	55.73	52.76	49.64	46.84	44.08	44.21	54.05	80.81	85.39	81.15	77.94	68.17	57.67	46.27
2007-11-19	0						34.3	33.35	33.62	33.96	36.13	47.46	63.15	68.37	68.85	71.36	72	70.14	62.47	61.92	56.83	54.74	63.47	95.84	97.45	86.26	75.15	70.28	58.09	47.46
2007-11-20	0						34.07	32.49	31.56	31.38	32.77	37.76	60.4	62.25	61.8	63.3	63.52	61.17	55.1	55.64	51.63	49.65	56.52	78.03	78.54	70.39	63.27	54.49	44.28	36.32
2007-11-21	0						30.05	28.5	27.31	26.97	28.28	32.53	48.12	53.95	55.8	56.97	59.22	59.14	47.75	53.51	46.73	42.39	52.45	68.03	69.1	58.1	55.5	44.04	35.26	29.91
2007-11-22	0						27.27	26.06	24.28	23.95	24.02	25.69	28.41	32.34	33.64	37.74	40.21	40.3	34.82	34.06	31.76	31.06	32.9	42.74	42.66	42.62	42.3	37.8	32.77	28.51
2007-11-23	0						29.35	28.45	28.46	28.47	29.53	31.41	41.08	49.66	55.95	59.1	59.66	55.4	46.82	47.3	42.17	40.53	47.04	75.02	79.52	74.71	67.92	53.93	43.6	39.61
2007-11-24	0						38.4	36.94	36.43	37.02	38.45	40.55	42.52	48.04	56.47	59.71	60.15	49.62	42.91	39.3	36.9	36.86	45.15	68.57	69.13	64.38	62.05	54.61	45.46	37.58
2007-11-25	0						38.55	37.35	36.34	35.97	36.44	38.91	41.66	44.03	49.06	49.97	47.93	45.49	42.22	39.76	37.49	37.18	43.16	66.96	71.29	67.96	64.43	54.98	41.93	35.72
2007-11-26	0						31.01	29.87	29.9	29.53	29.82	36.77	52.66	62.44	62.23	62.06	62.04	60.6	52.48	55.97	49.83	45.64	55.71	79.4	78.88	69.64	64.46	52.82	43.97	32.65
2007-11-27	0						28.56	26.75	25.9	25.62	26.95	31.4	46.94	53.32	52.22	52.78	53.59	51.47	47.05	48.21	43.31	41.45	50.46	76.29	83.57	74.95	62.1	54.36	43.41	36.13
2007-11-28	0						33.87	32.13	33.05	31.84	36.03	46.91	70.58	76.56	67.58	64.02	61.12	53.74	47.04	48.88	41.57	40.29	54.83	80.1	82.04	74.08	64.91	55.75	46.74	39.94
2007-11-29	0						32.86	32.12	31.54	31.73	32.63	41.42	65.68	71.06	68.46	65.54	65.71	56.67	50.85	51.27	44.52	44.57	56.19	75.99	87.89	78.48	72.32	65.1	49.06	40.64
2007-11-30	0						38.35	36.85	36.6	37.02	39.28	53.01	78.35	83.1	77.26	73.31	70.97	61.49	51.56	54.16	44	42.72	54.52	80.78	84.01	73.83	70.53	61.94	53.68	47.32
2007-12-01	0						45.85	42.86	40.82	40.72	43.05	49	54.36	63.18	73.42	73.43	70.94	60.58	51.17	46.66	42.72	41.94	50.87	80.24	84.89	79.14	76.14	69.43	56.98	46.71
2007-12-02	0						50.52	48.03	45.23	43.16	44.79	49.96	53.69	57.78	61.66	64.22	68.21	64.48	58.38	56.53	52.25	52.72	61.55	89.42	93.43	88.68	81.92	72.38	59.64	47.66
2007-12-03	0						36.1	34.7	33.98	33.53	34.6	43.59	71.3	78.61	77.39	74.6	75.09	72.22	66.57	66.1	58.41	61.33	74.89	107.71	114.35	97.2	91.68	81.65	70.32	57.76
2007-12-04	0						49.6	45.16	43.43	44.07	49.29	64.37	87.79	89.36	84.94	74.43	75.72	69.28	65.56	58.97	50.36	48.3	70.62	107.62	115.18	102.23	96.2	87.65	73.34	63.62
2007-12-05	0						60.71	56	53.09	53.49	57.16	74.23	92.45	111.74	101.46	90.84	91.34	87.09	82.24	79.31	73.03	70.71	87.18	118.75	127.91	110.97	103.09	95.6	81.54	70
2007-12-06	0						56.87	53.77	51.84	52.91	58.01	72.85	94.76	102.41	93.18	82.61	81.79	75.9	68.27	65.35	58.56	57.46	73.21	102.25	108.59	98.46	94.88	86.05	79.17	67.56
2007-12-07	0						59.61	56.13	53.17	53.26	57.49	74.69	100.8	103.32	92.5	88.12	86.74	79.17	69.14	66.24	58.97	57.56	73.25	102.63	106.43	86.64	83.15	77.07	67.39	56.39
2007-12-08	0						50.23	45.18	44.18	42.97	44.37	46.14	48.53	53.72	70.08	71.77	71.07	62.3	54.25	49.61	46.82	47.37	56	87.87	90.16	78.49	73.01	65.8	53.72	46.36
2007-12-09	0						41.6	37.35	35.18	33.4	34.75	38.4	43.65	48.96	51.25	57.36	59.66	57.26	52.42	52.27	48.86	49.07	61.34	83.38	86.42	78.69	72.61	65.26	49.88	38.63
2007-12-10	0						32.57	31.26	30.73	30.62	31.64	39.9	55.51	71.54	72.1	66.02	67.89	64.97	61.09	59.3	56.77	55.81	68.64	94.48	97.96	82.24	78.17	67.9	56.97	45.06
2007-12-11	0						37.41	34.6	33.37	32.85	36.29	48.15	66.35	80.73	76.09	72.57	70.88	68.99	65.4	63.31	60.81	59.78	69.64	99.85	104.02	86.12	82.71	73.62	59.85	43.17
2007-12-12	0						31.35	30.25	29.6	29.06	29.99	34.99	56.14	70.39	67.15	61.46	62.33	61.6	58.09	56.9	51.78	52.1	64.93	95.84	102.55	82.77	75.21	70.35	58.11	43.06
2007-12-13	0						36.39	34.02	33.25	32.85	35.17	42.47	67.37	68.47	66.13	70.29	71	72.76	66.19	64.92	59.17	56.46	75.97	107.95	114.51	93.47	89.85	80.77	64.65	52.34
2007-12-14	0						37.53	34.77	33.45	33.26	35.08	46.05	72.15	86.17	82.04	70.24	69.38	67.6	62.16	58.32	52.85	50.96	68.59	94.38	105.24	86.09	81.78	73.44	63.47	54.46
2007-12-15	0						47.92	43.05	40.45	39.52	41.14	46.02	49.52	56.25	63.6	67.16	68.66	64	57.88	53.69	48.65	49.75	66.73	98.42	100.98	91.77	79.97	75.35	64.02	50.14
2007-12-16	0						46.27	41.74	38.12	36.64	35.61	37.98	40.59	46.31	52.95	59.69	63.3	62.57	56.95	54.31	50.48	53.17	70.77	102.19	109.63	98.59	96.05	86.08	71.39	54.46
2007-12-17	0						47.86	43.83	42.28	41.93	45.84	58.03	85.89	101.92	97.67	89.75	85.56	80.5	71.21	69.32	64.59	64.66	87.35	122.96	128.36	113.37	104.39	100.91	79.1	59.65
2007-12-18	0						58.07	54.23	51.86	50.92	55.42	74.87	107.14	112.51	103.5	89.99	80.09	72.3	64.82	61.67	54.83	54.44	73.01	115.6	128.16	110.24	100.81	93.89	72.69	58.18
2007-12-19	0						48.67	44.57	42.81	42.49	47.96	62.15	98.55	93.12	81.94	68.11	66.68	60.4	55.23	52.59	47.55	46.01	58.32	96.71	104.73	93.52	83.18	76.35	59.2	52.75
2007-12-20	0						42.22	38.22	37.21	37.74	41.42	54.59	82.7	81.18	72.17	62.97	58.29	53.74	50.45	47.7	42.79	43.28	52.83	86.47	91.92	83.29	78.73	70.77	54.21	48.3
2007-12-21	0						43.46	40.09	38.32	38.54	41.03	53.28	82.24	81.33	68.75	59.28	57.11	53.23	49.7	45.92	43.86	42.84	49.71	76.71	81.66	68.77	66.9	54.04	43.38	41.35
2007-12-22	0						42.48	39.15	36.55	34.89	34.28	37.05	39.86	47.69	51.24	56.35	56.2	49.16	43.93	41.25	39.27	39.39	47.79	76.55	76.64	65.06	56.94	51.34	42.25	36.41
2007-12-23	0						32.39	30.02	29.2	28.45	28.23	29.36	30.12	33.08	36.72	38.99	40.47	38.26	37.03	36.57	34.68	35.86	41.52	64.97	70.68	63.91	57.52	51.83	37.95	33.06
2007-12-24	0						31.85	30.79	30.35	30.11	29.88	31.25	35.52	36.49	45.05	48.84	49.49	45.72	42.39	42.14	39.29	39.17	48.44	70.93	72.04	62.3	56.41	51.76	43.17	40.53
2007-12-25	0						30.2	29.59	28.04	27.58	28.03	28.84	29.38	32.53	33.76	34.55	34.55	33.38	32.8	31.94	30.7	30.5	32.43	38.11	38.37	39.01	41.19	39.01	33.25	29.08
2007-12-26	0						29.91	28.5	28.05	27.93	28.36	33.29	41.57	47.4	50.63	53.42	55.21	48.72	45.98	42.35	40.16	39.38	52.92	76.01	76.58	66.89	63.79	60.27	41.13	34.06
2007-12-27	0						33.48	31.76	30.77	31.15	32.74	41.31	56.47	55.61	64.73	62.73	59.61	54.77	51.19	48.84	43.62	41.98	53.49	82.46	80.94	75.35	68.45	65.96	41.48	35.67
2007-12-28	0						30.88	29.11	28.34	28.32	29.2	34.72	49.99	53.29	54.73	51.37	54.07	50.45	45.32	44.1	39.99	39.57	46.32	70.5	66.05	58.81	55.1	47.04	36.61	32.13
2007-12-29	0						30.41	29.18	27.3	26.89	26.72	26.75	28.4	32.75	36.52	41.24	43.37	40.06	37.68	35.96	33.4	34.48	40.92	62.82	61.62	54.54	50.35	44.8	37.24	32.79
2007-12-30	0						34.48	33.53	31.45	30.75	30.93	31.3	32.79	38.75	42.23	45.58	47.9	45.04	42.26	42.85	39.49	41.11	51.56	71.9	75.77	67.83	62.27	54.28	42.37	36.93
2007-12-31	0						30.67	30.32	29.29	29.24	30.09	33.96	47.49	53.76	52.41	49.99	48.85	47.72	44.22	42.73	40.69	40.62	47.69	74.72	78.48	66.08	56.66	49.68	40.24	35.13
