# Supplementary material for: Multi-Objective Control of Air Conditioning Improves Cost, Comfort and System Energy Balance
Source: Preprints.org preprint supplement (doi:10.20944/preprints201808.0120.v3), 2018-09-10
Supplement: Supplementary file 3 [file system_lambda.xlsx]

## Sheet: Sheet1
respondent_id	report_yr	report_prd	spplmnt_num	row_num	lambda_date	timezone	hour01 ($/MWh)	hour02	hour03	hour04	hour05	hour06	hour07	hour08	hour09	hour10	hour11	hour12	hour13	hour14	hour15	hour16	hour17	hour18	hour19	hour20	hour21	hour22	hour23	hour24	hour25	timezone_f	hour01_f	hour02_f	hour03_f	hour04_f	hour05_f	hour06_f	hour07_f	hour08_f	hour09_f	hour10_f	hour11_f	hour12_f	hour13_f	hour14_f	hour15_f	hour16_f	hour17_f
178	2013	12	0	100	2013-01-01	HST	180.69	181.15	128.99	29.57	29.22	29.36	29.86	148.06	180.33	80.14	171.44	181.03	181.68	58.37	179.58	179.58	181.25	182.2	185.85	188.6	184.26	182.42	172.8	171.58	0	0	0	0	0	0	0	0	0	0	0	0	0	0	0	0	0	0	0
178	2013	12	0	200	2013-01-02	HST	178.87	28.99	28.06	28.09	28.4	29.65	181.99	188.1	180.65	181.93	182.48	183.53	182.93	183.07	181.92	183.75	186.12	185.52	186.93	191.75	189.03	187.17	184.05	181.19	0	0	0	0	0	0	0	0	0	0	0	0	0	0	0	0	0	0	0
178	2013	12	0	300	2013-01-03	HST	179.77	179.67	29.89	29.46	29.57	123.25	170.68	184.34	185.55	184.21	185.81	185.42	185.15	185.61	189.17	187.81	187.52	187.96	189.96	189.99	186.58	182.74	170.67	175.11	0	0	0	0	0	0	0	0	0	0	0	0	0	0	0	0	0	0	0
178	2013	12	0	400	2013-01-04	HST	179.08	29.78	29.34	29.41	29.69	125.28	186.16	182.05	183.58	184.48	182.85	181.6	171.38	179.45	183.63	183.11	180.67	184.74	186.87	190.28	183.83	182.64	184.82	122.1	0	0	0	0	0	0	0	0	0	0	0	0	0	0	0	0	0	0	0
178	2013	12	0	500	2013-01-05	HST	30.25	30.17	29.49	29.4	29.53	29.7	30.41	184.34	183.64	184.84	170.87	178.68	181.59	170.73	117.06	181.82	183.55	187.39	190.26	186.13	186.23	186.08	181.42	187.8	0	0	0	0	0	0	0	0	0	0	0	0	0	0	0	0	0	0	0
178	2013	12	0	600	2013-01-06	HST	185.51	143.15	30.05	29.78	29.82	30.16	29.88	181.63	185.81	187.14	189.45	187.07	186.6	186.25	187.03	189.89	192.17	197.97	195.97	200.85	196.42	193.1	188.65	181.43	0	0	0	0	0	0	0	0	0	0	0	0	0	0	0	0	0	0	0
178	2013	12	0	700	2013-01-07	HST	182.78	30.36	30.32	30.08	30.31	182	189.63	196.49	192.6	195.4	194.68	192.24	189.6	189.79	189.7	188.54	192.05	190.73	190.04	195.46	190.85	191.44	193.1	190.05	0	0	0	0	0	0	0	0	0	0	0	0	0	0	0	0	0	0	0
178	2013	12	0	800	2013-01-08	HST	183.5	177.15	30.38	30.09	30.3	181.47	191.09	198.09	191.33	189.86	190.03	191.54	189.5	186.95	187.43	191.62	193.27	190.72	191.15	194.58	192.06	188.26	188.22	186.15	0	0	0	0	0	0	0	0	0	0	0	0	0	0	0	0	0	0	0
178	2013	12	0	900	2013-01-09	HST	183.01	30.23	30.19	30.02	30.29	182.44	190.93	196.98	194.36	196.41	195.83	186.61	192.28	189.36	189.56	190.51	191.14	192.59	189.53	194.81	192.41	191.17	192.31	190.27	0	0	0	0	0	0	0	0	0	0	0	0	0	0	0	0	0	0	0
178	2013	12	0	1000	2013-01-10	HST	188.42	182.06	120.85	30.26	30.4	181.29	189.89	196.56	194.43	195.15	197.48	197.82	195.8	195.31	193.54	192.03	190.74	192.78	192.53	196.05	192.25	191.47	190.33	185.62	0	0	0	0	0	0	0	0	0	0	0	0	0	0	0	0	0	0	0
178	2013	12	0	1100	2013-01-11	HST	182.26	119.9	29.88	29.74	29.97	176.18	188.47	195.68	193.56	195.93	193.02	194.32	192.94	191.11	190.25	191.24	194.68	193.09	195.77	199.71	191.49	193.36	190.94	188.82	0	0	0	0	0	0	0	0	0	0	0	0	0	0	0	0	0	0	0
178	2013	12	0	1200	2013-01-12	HST	186.23	181.42	128.07	30.03	30.16	131.35	182.18	187.52	190.19	192.03	192.21	191.38	190.16	188.21	187.77	188.78	190.33	190.49	191.84	194.58	191.72	192.68	191.77	191.43	0	0	0	0	0	0	0	0	0	0	0	0	0	0	0	0	0	0	0
178	2013	12	0	1300	2013-01-13	HST	186.09	181.27	124.83	30.14	30.07	30.38	175.07	182.91	185.54	190.14	190.99	189.11	188.57	188.99	189.41	188.9	191.7	193.9	197.62	198.2	195.08	195.53	193.22	191.76	0	0	0	0	0	0	0	0	0	0	0	0	0	0	0	0	0	0	0
178	2013	12	0	1400	2013-01-14	HST	186.9	174.39	30.37	172.59	128.4	184.46	190.09	198.14	197.45	198.36	196.14	222.94	209.02	207.59	210.01	206.71	205.25	210.29	224.09	252.31	231.81	209.55	204.98	197.82	0	0	0	0	0	0	0	0	0	0	0	0	0	0	0	0	0	0	0
178	2013	12	0	1500	2013-01-15	HST	190.4	191.34	189.44	188.55	189.56	190.84	196.45	202.16	201.54	201.98	202.69	202.92	202.21	203.52	203.1	204.89	208.11	219.59	216.13	222.54	221.22	208.32	202.11	196.61	0	0	0	0	0	0	0	0	0	0	0	0	0	0	0	0	0	0	0
178	2013	12	0	1600	2013-01-16	HST	193.56	190.04	186.15	183.09	185.35	191.71	193.84	204.36	203.98	205.61	202.54	196.07	202.69	204.71	197.46	198.01	204	208.21	215.53	210.19	204.84	207.17	202.66	198.09	0	0	0	0	0	0	0	0	0	0	0	0	0	0	0	0	0	0	0
178	2013	12	0	1700	2013-01-17	HST	195.87	191.24	187.87	185.77	187.71	188.15	195.26	203.57	194.89	196.77	197.07	198.05	200.4	201.08	199.82	200.14	203.16	204.51	201.09	208.13	201.3	197.47	194.74	188.78	0	0	0	0	0	0	0	0	0	0	0	0	0	0	0	0	0	0	0
178	2013	12	0	1800	2013-01-18	HST	185.86	180.64	172.33	146.49	175.3	184.08	189.89	193.64	191.99	193.51	193.31	192.57	192.83	192.21	194.62	195.32	198.18	194.51	195.04	195.75	189.48	193.03	190.25	187.62	0	0	0	0	0	0	0	0	0	0	0	0	0	0	0	0	0	0	0
178	2013	12	0	1900	2013-01-19	HST	183.43	186.58	185.48	184.45	183.37	184.36	189.15	190.96	192.54	189.84	187.99	185.13	182.85	183.69	176.22	184.62	186.73	190.87	192.89	198.33	194.52	194.34	191.9	193.08	0	0	0	0	0	0	0	0	0	0	0	0	0	0	0	0	0	0	0
178	2013	12	0	2000	2013-01-20	HST	192.15	188.03	184.99	183.42	183.04	184.88	188.21	191.2	192.92	190.17	188.73	186.49	184.48	182.13	185.22	185.68	188.2	193.12	196.32	203.23	196.78	197.01	194.5	193.16	0	0	0	0	0	0	0	0	0	0	0	0	0	0	0	0	0	0	0
178	2013	12	0	2100	2013-01-21	HST	198.06	191.82	188.77	187.27	187.77	189.64	191.48	192.63	191.97	193.09	190.96	189.54	191.26	190.34	190.77	194.44	198.23	200.19	199.7	205.49	201.54	197.9	202.26	196.77	0	0	0	0	0	0	0	0	0	0	0	0	0	0	0	0	0	0	0
178	2013	12	0	2200	2013-01-22	HST	194.93	190.74	190.05	189.98	190.69	192.3	194.16	198.92	199.8	197.86	199.24	199.53	197.17	197.81	197.6	198.66	202.32	201.75	205.4	209.48	202.95	202.56	203.22	195	0	0	0	0	0	0	0	0	0	0	0	0	0	0	0	0	0	0	0
178	2013	12	0	2300	2013-01-23	HST	189.88	182.47	182.46	182.96	182.93	183.27	190.83	195.68	196.52	196.83	196.59	196.18	199.7	194.68	193.24	190.67	192.13	195.47	196.19	203.71	197.09	200.08	198.45	196.65	0	0	0	0	0	0	0	0	0	0	0	0	0	0	0	0	0	0	0
178	2013	12	0	2400	2013-01-24	HST	191.96	188.02	188.21	190.51	191.3	190.39	192.16	198.12	197.62	197.41	199.81	199.67	195.82	190.63	190.59	189.58	191.48	194.24	195.19	202.53	195.77	188.21	188.1	182.69	0	0	0	0	0	0	0	0	0	0	0	0	0	0	0	0	0	0	0
178	2013	12	0	2500	2013-01-25	HST	119.24	29.52	28.97	28.69	28.84	29.9	183.45	187.89	187.56	186.56	185.87	185.04	185.46	189.3	189.77	191.84	189.7	190.85	190.56	193.08	191.83	190.05	189.4	184.69	0	0	0	0	0	0	0	0	0	0	0	0	0	0	0	0	0	0	0
178	2013	12	0	2600	2013-01-26	HST	174.81	29.87	29.07	28.74	28.62	29.09	29.95	179.95	184.09	183.78	183.58	182.9	182.77	184.63	179.62	183.56	184.17	183.91	185.09	188.36	190.85	188.7	188.04	182.72	0	0	0	0	0	0	0	0	0	0	0	0	0	0	0	0	0	0	0
178	2013	12	0	2700	2013-01-27	HST	174.11	29.52	28.99	28.44	28.19	28.58	29.22	126.29	182.08	185.85	186.14	187.06	185.74	186.19	185.85	188.02	188.49	189.11	192.73	190.31	190.24	188.04	186.95	184.58	0	0	0	0	0	0	0	0	0	0	0	0	0	0	0	0	0	0	0
178	2013	12	0	2800	2013-01-28	HST	182.58	30.4	30.09	29.88	30.19	182.34	187.32	190.97	191.09	191.3	190.6	191.7	192.35	191.12	189.66	189.05	190.45	191.64	196.04	197.67	193.78	192.94	190.62	190.3	0	0	0	0	0	0	0	0	0	0	0	0	0	0	0	0	0	0	0
178	2013	12	0	2900	2013-01-29	HST	184.48	181.47	30.4	30.17	172.23	183.01	187.45	193.07	189.32	189.42	188.43	188.96	190.92	190.8	190.94	190.8	193.08	192.29	192.17	195.96	191.3	191.25	190.33	186.41	0	0	0	0	0	0	0	0	0	0	0	0	0	0	0	0	0	0	0
178	2013	12	0	3000	2013-01-30	HST	184.32	173.1	29.93	29.7	29.9	178.93	185.68	188.81	188.31	186.72	186.74	185.51	188.38	188.82	190.04	192.51	192.51	193	191.73	194.67	191.47	191.81	190.29	187.94	0	0	0	0	0	0	0	0	0	0	0	0	0	0	0	0	0	0	0
178	2013	12	0	3100	2013-01-31	HST	182.83	174	30.08	29.67	29.92	181.69	186.73	191.39	189.88	188.47	189.43	188.33	188.35	189.59	188.31	188.57	190.49	192.72	192.21	195.57	192.92	189.59	190.27	187.23	0	0	0	0	0	0	0	0	0	0	0	0	0	0	0	0	0	0	0
178	2013	12	0	3200	2013-02-01	HST	185.65	182.27	180.89	175.76	180.07	182.75	184.97	189.68	189.34	187.52	185.12	182.97	180.16	179.4	179.5	183.32	187.26	186.63	188.14	189.78	187.92	187.41	186.19	182.41	0	0	0	0	0	0	0	0	0	0	0	0	0	0	0	0	0	0	0
178	2013	12	0	3300	2013-02-02	HST	179.16	29.77	28.67	28.3	28.3	28.98	30.07	177.47	180.13	181.44	182.46	181	180.41	178.78	178.3	179.36	181.84	183.55	183.78	185.71	182.48	183.62	180.88	178.37	0	0	0	0	0	0	0	0	0	0	0	0	0	0	0	0	0	0	0
178	2013	12	0	3400	2013-02-03	HST	128.42	29.59	29.01	28.5	28.56	28.85	29.13	29.88	144.66	179.17	181.26	181.08	181.41	179.49	178.12	176.68	181.34	180.4	183.91	185.39	183.21	180.39	178.83	30.45	0	0	0	0	0	0	0	0	0	0	0	0	0	0	0	0	0	0	0
178	2013	12	0	3500	2013-02-04	HST	29.41	28.57	28.77	28.6	28.81	29.72	122.01	179.89	179.29	179.49	179.83	183.54	182.04	181.1	179.92	179.62	181.86	183.64	183.32	187.16	189.03	184.01	184.25	181.71	0	0	0	0	0	0	0	0	0	0	0	0	0	0	0	0	0	0	0
178	2013	12	0	3600	2013-02-05	HST	30.21	29.25	28.45	28.72	28.95	29.67	181.3	187.18	183.71	122.92	175.32	172.56	173.08	171.59	30.44	171.85	179.82	181.69	181.98	186.57	184.66	178.57	183.33	181.65	0	0	0	0	0	0	0	0	0	0	0	0	0	0	0	0	0	0	0
178	2013	12	0	3700	2013-02-06	HST	128.09	29.69	29.24	28.97	28.69	29.5	180.22	187.05	183.22	183.47	185.75	179.48	124	179.46	179.12	178.46	180.58	182.8	181.14	186.5	185.31	182.4	179.78	179.59	0	0	0	0	0	0	0	0	0	0	0	0	0	0	0	0	0	0	0
178	2013	12	0	3800	2013-02-07	HST	184.47	144.44	30.19	30.12	30.34	179.66	178.33	183.88	180.46	179.72	180.61	178.87	177.97	179.03	178.21	175.81	175.21	178.9	184.01	188.06	186.66	183.1	181.43	182.18	0	0	0	0	0	0	0	0	0	0	0	0	0	0	0	0	0	0	0
178	2013	12	0	3900	2013-02-08	HST	183.27	177.95	134.55	30.42	30.49	180.17	178.2	183.06	181.25	178.45	178.37	179.93	178.34	178.34	178.43	180.18	185.07	180.45	181.97	183.36	181.02	184.46	182.13	186.25	0	0	0	0	0	0	0	0	0	0	0	0	0	0	0	0	0	0	0
178	2013	12	0	4000	2013-02-09	HST	183.4	178.64	131.51	30.21	30.18	130.7	179.56	182.84	184.62	183.3	186.04	125.02	122.44	122.96	121.89	123.41	178.17	177.66	179.1	184.88	183.66	182.48	188.06	183.69	0	0	0	0	0	0	0	0	0	0	0	0	0	0	0	0	0	0	0
178	2013	12	0	4100	2013-02-10	HST	178.15	141.89	170.18	29.55	29.45	29.88	136.35	178.86	182.5	181.33	184.77	185.93	184.67	172.72	123.93	122.25	178.14	180.21	185.35	186.69	183.99	182.5	179.32	177.91	0	0	0	0	0	0	0	0	0	0	0	0	0	0	0	0	0	0	0
178	2013	12	0	4200	2013-02-11	HST	179.28	30.48	30.12	29.67	30.16	177.92	178.21	183.65	180.27	178.91	182.34	178.3	176.42	178.32	125.44	124.99	177.48	178.47	181.91	187.24	183.36	180.31	178.24	119.37	0	0	0	0	0	0	0	0	0	0	0	0	0	0	0	0	0	0	0
178	2013	12	0	4300	2013-02-12	HST	139.32	30.01	29.68	29.61	29.76	30.41	179.6	180.53	179.75	178.68	178.16	178.24	170.58	180.22	179.85	178.31	178.35	181.96	184.09	185.25	183.23	181.76	178.29	123.88	0	0	0	0	0	0	0	0	0	0	0	0	0	0	0	0	0	0	0
178	2013	12	0	4400	2013-02-13	HST	178.83	126.48	29.69	29.58	29.86	149.22	178.03	185.3	182.52	182.58	181.1	186.27	180.8	177.82	179.73	174.71	179.33	187.83	187.57	193.35	188.49	183.63	182.34	30.29	0	0	0	0	0	0	0	0	0	0	0	0	0	0	0	0	0	0	0
178	2013	12	0	4500	2013-02-14	HST	30.47	29.62	28.97	28.77	28.99	29.88	178.96	186.2	182.77	184.26	182.1	183.74	177.61	171.18	178.12	183.13	179.4	181.83	187.11	192.95	189.33	187.1	183.22	139.61	0	0	0	0	0	0	0	0	0	0	0	0	0	0	0	0	0	0	0
178	2013	12	0	4600	2013-02-15	HST	29.36	28.35	28.32	28.27	28.68	29.28	30.41	183.55	184.07	181.5	180.85	182.68	182.07	181.61	180.81	182.82	183.18	180.69	181.25	188.28	190.57	187.55	183.05	181.23	0	0	0	0	0	0	0	0	0	0	0	0	0	0	0	0	0	0	0
178	2013	12	0	4700	2013-02-16	HST	30.05	30.05	29.68	29.45	29.18	29.58	30.32	180.26	178.86	180.7	180.09	30.37	30.21	30.21	177.34	179.61	182.8	185.03	187.09	187.62	186.26	182.75	179.69	128.19	0	0	0	0	0	0	0	0	0	0	0	0	0	0	0	0	0	0	0
178	2013	12	0	4800	2013-02-17	HST	123.55	126.34	177.62	179.16	180.65	180.98	182.47	179.67	184.79	184.33	181.72	127.17	178.75	178.66	184.87	185.3	178.41	181.84	185.5	190.31	187.2	185.26	185.6	184.29	0	0	0	0	0	0	0	0	0	0	0	0	0	0	0	0	0	0	0
178	2013	12	0	4900	2013-02-18	HST	184.45	180.41	177.75	143.84	173.17	176.48	181.45	181.98	184.81	185.39	182.49	119.48	120.12	120.85	176.34	177.24	182.47	187.09	191.45	195.75	191.23	189.03	184.94	183.11	0	0	0	0	0	0	0	0	0	0	0	0	0	0	0	0	0	0	0
178	2013	12	0	5000	2013-02-19	HST	184.5	181.46	153.97	129.67	150.53	181.82	181.49	183.92	184.83	180.67	182.22	177.96	177.93	179.77	183.86	184.47	185.69	188.37	189.62	192	193.68	187.94	183.58	182.6	0	0	0	0	0	0	0	0	0	0	0	0	0	0	0	0	0	0	0
178	2013	12	0	5100	2013-02-20	HST	184.37	182.01	148.49	174.39	139.36	181.83	179.02	186.54	187.47	186.54	185.66	183.49	185.7	182.21	183.59	183.65	186.92	187.01	188.63	189.95	187.72	187.34	181.88	183.76	0	0	0	0	0	0	0	0	0	0	0	0	0	0	0	0	0	0	0
178	2013	12	0	5200	2013-02-21	HST	183.42	181.75	181.69	182.24	184.99	125.09	183.17	189.01	186.19	189.5	184.96	183.38	184.68	182.16	185.38	187.39	185.77	187.73	191.07	191.25	190.2	187.72	184.94	181.53	0	0	0	0	0	0	0	0	0	0	0	0	0	0	0	0	0	0	0
178	2013	12	0	5300	2013-02-22	HST	184.47	182.45	180.28	180.23	181.87	186.24	185.68	187.65	187.15	187.69	187.05	187.01	185.13	181.79	180.73	183.67	185.88	187.22	186.87	187.6	190.35	188.96	188.46	192.18	0	0	0	0	0	0	0	0	0	0	0	0	0	0	0	0	0	0	0
178	2013	12	0	5400	2013-02-23	HST	187.28	183.5	185	185.91	184.76	186.72	189.95	192.58	195.32	190.4	188.57	178.95	178.19	175.22	180.34	184.85	188.48	189.72	189.12	191.11	189.78	187.04	188.26	188.86	0	0	0	0	0	0	0	0	0	0	0	0	0	0	0	0	0	0	0
178	2013	12	0	5500	2013-02-24	HST	187.2	188.7	185.61	183.3	183.65	186.38	187.55	190.16	191.5	189.83	190.2	178.15	178.34	178.32	181.42	184.99	188.59	190.32	192.64	193	190.78	190.25	189.23	179.84	0	0	0	0	0	0	0	0	0	0	0	0	0	0	0	0	0	0	0
178	2013	12	0	5600	2013-02-25	HST	170.5	178.14	123.49	123.03	125.1	179.69	187.3	192.52	188.01	188.4	187.11	186.27	184.01	184.62	187.42	189.72	189.81	191.5	193.6	198.42	195.73	191.46	191.04	179.93	0	0	0	0	0	0	0	0	0	0	0	0	0	0	0	0	0	0	0
178	2013	12	0	5700	2013-02-26	HST	179.56	178.22	122.61	122.66	172.19	178.99	187.06	191.34	188.49	186.48	188.07	186.77	188.43	189.39	188.74	189.32	188.87	191.52	193.5	195.01	195.41	191.04	191.34	182.32	0	0	0	0	0	0	0	0	0	0	0	0	0	0	0	0	0	0	0
178	2013	12	0	5800	2013-02-27	HST	179.56	178.28	177.72	125.68	178.16	178.37	187.02	192.19	190.63	189.42	186.63	185.6	179.4	179.05	184.07	186.15	186.93	190.25	193.25	197.62	198.03	193.43	186.9	182.85	0	0	0	0	0	0	0	0	0	0	0	0	0	0	0	0	0	0	0
178	2013	12	0	5900	2013-02-28	HST	179.74	178.25	124.59	120.63	121.11	178.37	186.21	190.91	190.24	187.88	187.01	187.39	183.47	186.7	188.35	188.66	191.19	192.48	192.25	196.69	194.86	190.31	191.44	188.86	0	0	0	0	0	0	0	0	0	0	0	0	0	0	0	0	0	0	0
178	2013	12	0	6000	2013-03-01	HST	180.32	178.27	176.24	148.31	175.92	179.74	187.24	190.44	189.54	190.34	190.83	186.29	185.42	185.92	184.79	187.83	186.81	189.45	187.74	191.77	189.1	190.05	192.36	190.43	0	0	0	0	0	0	0	0	0	0	0	0	0	0	0	0	0	0	0
178	2013	12	0	6100	2013-03-02	HST	188.53	185.56	183.75	181.52	183.23	186.04	185.49	183.26	184.11	187.53	180.36	180.72	177.98	182.74	174.04	177.49	183.91	190.84	192.67	194.51	194.02	191.91	195.41	191.21	0	0	0	0	0	0	0	0	0	0	0	0	0	0	0	0	0	0	0
178	2013	12	0	6200	2013-03-03	HST	186.13	182.82	177.4	173.37	171.13	178.65	182.37	184.34	188.72	190.56	189.7	127.39	128.8	127.45	125.35	125.62	183.83	185.67	191.17	194.82	193.66	190.75	188.31	183.98	0	0	0	0	0	0	0	0	0	0	0	0	0	0	0	0	0	0	0
178	2013	12	0	6300	2013-03-04	HST	181.77	177.42	129.05	128.46	175.23	179.97	185.49	188.04	183.82	182.63	187.56	180.53	178.04	179.47	177.93	180.45	185.61	187.58	193.51	196.02	193.53	191.31	191.75	195.46	0	0	0	0	0	0	0	0	0	0	0	0	0	0	0	0	0	0	0
178	2013	12	0	6400	2013-03-05	HST	145.2	177.94	176.78	129.17	174.3	182.07	187.48	188.11	187.03	185.59	178.83	177.59	181.19	182.03	186.24	189.27	187.18	191.62	191.94	199.02	194.09	190.38	190.71	194.57	0	0	0	0	0	0	0	0	0	0	0	0	0	0	0	0	0	0	0
178	2013	12	0	6500	2013-03-06	HST	185.14	183.82	183.86	178.55	178.94	183.54	188.38	192.59	188.62	186.31	185.43	187.2	187.17	187.27	184.66	187.18	191.37	190.34	190.26	198.14	194.83	191.34	190.87	191.86	0	0	0	0	0	0	0	0	0	0	0	0	0	0	0	0	0	0	0
178	2013	12	0	6600	2013-03-07	HST	183.92	184.05	183.66	182.05	181.79	183.84	186.99	190.3	188.54	190.49	190.74	192.6	192.95	191.85	191.69	194.84	197.21	198.02	195.68	201.12	198.4	194.01	194.01	188.95	0	0	0	0	0	0	0	0	0	0	0	0	0	0	0	0	0	0	0
178	2013	12	0	6700	2013-03-08	HST	183.59	180.05	178.75	177.21	177.83	181.79	183.56	183.31	182.51	183.91	184.23	185.73	182.4	186.83	187.61	188.66	190.62	190.76	194.71	194.33	190.51	187.94	194.3	191.37	0	0	0	0	0	0	0	0	0	0	0	0	0	0	0	0	0	0	0
178	2013	12	0	6800	2013-03-09	HST	190.67	185.82	183.22	182.5	182.88	186.25	189.3	190.41	190.33	187.39	181.15	182.51	182.3	182.33	182.45	182.64	187.08	189.41	190.6	193.3	192.97	191.8	194.44	191.12	0	0	0	0	0	0	0	0	0	0	0	0	0	0	0	0	0	0	0
178	2013	12	0	6900	2013-03-10	HST	188.18	184.81	182.88	180.72	181.2	183.15	185.66	186.35	190.06	191.68	185.97	185.23	184.94	184.81	183.38	184.87	186.79	190.13	192.1	193.5	191.79	189.26	185.51	183.76	0	0	0	0	0	0	0	0	0	0	0	0	0	0	0	0	0	0	0
178	2013	12	0	7000	2013-03-11	HST	177.11	172.66	123.31	121.42	123.34	179.15	184.93	187.64	182.49	186.68	182.41	183.89	182.53	182.59	182.33	182.52	183.68	189.58	193.08	193.96	194.18	188.9	185.78	182.44	0	0	0	0	0	0	0	0	0	0	0	0	0	0	0	0	0	0	0
178	2013	12	0	7100	2013-03-12	HST	174.47	120.32	121.4	148.5	151.27	180.89	182.02	184.61	184.24	183.22	182.98	184.49	185.21	186.29	184.61	185.34	185.54	188.3	188.18	191.44	190.98	187.56	183.51	182.41	0	0	0	0	0	0	0	0	0	0	0	0	0	0	0	0	0	0	0
178	2013	12	0	7200	2013-03-13	HST	184.07	179.22	126.45	28.73	122.65	176.66	121.32	182.45	179.43	178.82	178.11	178.98	179.54	181.34	182.38	181.57	182.4	183.25	185.13	188.32	186.95	182.88	179.64	123.97	0	0	0	0	0	0	0	0	0	0	0	0	0	0	0	0	0	0	0
178	2013	12	0	7300	2013-03-14	HST	30.4	29.45	28.91	28.68	28.89	29.75	125.55	179.85	177.65	179.74	182.37	182.47	182.41	180.17	178.46	177.97	181.6	182.13	184.47	187.53	186.02	182.45	178.05	66.92	0	0	0	0	0	0	0	0	0	0	0	0	0	0	0	0	0	0	0
178	2013	12	0	7400	2013-03-15	HST	29.95	28.92	28.8	28.64	28.89	29.78	183.42	182.76	176.49	178.77	182.58	186.52	184.8	189.6	186.2	182.54	182.43	182.41	182.68	183.18	183.33	182.38	180.21	177.3	0	0	0	0	0	0	0	0	0	0	0	0	0	0	0	0	0	0	0
178	2013	12	0	7500	2013-03-16	HST	141.3	29.86	29.94	29.44	29.35	29.74	143.97	179.73	182.65	184.04	180.19	124.68	177.37	169.95	168.76	176.92	179.78	181.5	182.13	186.01	182.67	180.63	180.95	177.96	0	0	0	0	0	0	0	0	0	0	0	0	0	0	0	0	0	0	0
178	2013	12	0	7600	2013-03-17	HST	29.8	28.98	28.57	28.39	28.39	28.46	28.92	29.75	140.07	178.75	135.99	29.06	29.36	29.09	29.09	29.44	123.73	179.08	182.43	185.52	184.08	182.17	177.24	30.25	0	0	0	0	0	0	0	0	0	0	0	0	0	0	0	0	0	0	0
178	2013	12	0	7700	2013-03-18	HST	29.8	28.88	28.57	28.42	28.53	29.23	29.64	123.4	128.84	178.37	127.92	30.29	30.36	30.28	30.36	100.88	124.67	127.8	182.41	183.86	182.58	181.09	177.16	123.04	0	0	0	0	0	0	0	0	0	0	0	0	0	0	0	0	0	0	0
178	2013	12	0	7800	2013-03-19	HST	30.14	29.1	28.68	28.49	28.54	29.51	30.08	174.55	177.37	106.45	176.36	126.18	123.09	127.46	126.71	178.49	179.9	183.1	184.93	186.93	186.89	184.52	182.46	178.69	0	0	0	0	0	0	0	0	0	0	0	0	0	0	0	0	0	0	0
178	2013	12	0	7900	2013-03-20	HST	144.27	29.69	29.08	28.81	28.95	29.69	29.86	120.86	123.92	176.69	126.96	124.51	127.43	179.18	176.14	179.31	182.31	183.18	185.4	187.17	186.45	185.58	183.58	180.73	0	0	0	0	0	0	0	0	0	0	0	0	0	0	0	0	0	0	0
178	2013	12	0	8000	2013-03-21	HST	178.49	29.96	29.32	29.11	29.29	30.02	149.63	182.43	184	182.49	182.52	182.39	181.72	182.45	182.53	182.4	182.6	183.52	183.85	186.7	187.32	186.42	182.81	179.77	0	0	0	0	0	0	0	0	0	0	0	0	0	0	0	0	0	0	0
178	2013	12	0	8100	2013-03-22	HST	179.64	30.14	29.5	29.44	29.65	30.33	126.47	181.36	182.9	182.54	182.41	181.52	178.5	182.48	177.4	180.01	183.39	182.23	185.3	186.29	185.12	183.15	183.95	184.01	0	0	0	0	0	0	0	0	0	0	0	0	0	0	0	0	0	0	0
178	2013	12	0	8200	2013-03-23	HST	179.06	30.32	29.62	29.25	29.18	29.53	30.32	179.18	183.08	182.74	183.02	181.72	180.66	179.11	183.1	183.35	184.19	184.11	187.05	186.49	187.55	187.82	184.95	180.13	0	0	0	0	0	0	0	0	0	0	0	0	0	0	0	0	0	0	0
178	2013	12	0	8300	2013-03-24	HST	96.12	29.72	29.14	28.59	28.64	28.85	29.71	178.39	181.54	186.73	191.75	189.79	190.54	189.1	188.27	188.91	189.69	186.33	187.46	188.94	188.1	187.92	186.09	183.19	0	0	0	0	0	0	0	0	0	0	0	0	0	0	0	0	0	0	0
178	2013	12	0	8400	2013-03-25	HST	30.45	29.29	28.8	28.56	28.75	29.95	30.1	127.82	181.07	180.32	178.83	172.67	182.5	182.36	182.46	182.38	183.27	183.78	184.42	186.06	186.98	184.47	182.38	181.04	0	0	0	0	0	0	0	0	0	0	0	0	0	0	0	0	0	0	0
178	2013	12	0	8500	2013-03-26	HST	165.48	29.89	29.31	29.03	29.11	29.91	30.15	128.38	180.7	182.41	180.92	146.64	124.91	155.71	182.52	182.44	182.5	182.72	185.87	188.19	183.97	185.04	183.36	181.13	0	0	0	0	0	0	0	0	0	0	0	0	0	0	0	0	0	0	0
178	2013	12	0	8600	2013-03-27	HST	178.85	30.12	29.5	29.14	29.42	30.33	126.53	182.63	182.97	183.52	182.32	176.85	124.51	125.34	176.31	177.07	176.61	181.19	185.52	188.19	187.48	186.11	182.93	179.19	0	0	0	0	0	0	0	0	0	0	0	0	0	0	0	0	0	0	0
178	2013	12	0	8700	2013-03-28	HST	178.1	29.9	29.42	29.16	29.33	30.25	123.64	183.01	183.3	178.65	177.69	127.21	123.14	30.24	30.27	30.41	125.18	179.15	182.68	185.11	183.53	180.25	124.72	180	0	0	0	0	0	0	0	0	0	0	0	0	0	0	0	0	0	0	0
178	2013	12	0	8800	2013-03-29	HST	176.57	29.57	29.02	28.72	28.82	29.75	178.96	183.75	185.9	187.07	187.07	186.12	184.52	184.53	184.63	184.89	186.4	182.7	183.29	184.75	184.68	184.47	186.93	183.91	0	0	0	0	0	0	0	0	0	0	0	0	0	0	0	0	0	0	0
178	2013	12	0	8900	2013-03-30	HST	178.02	30.07	29.48	29.17	29.16	29.58	30.43	180.57	184.04	185.2	185.55	185.57	186.18	185.81	183.68	184.19	185.25	185.66	183.43	185.19	182.61	182.32	185.07	183.87	0	0	0	0	0	0	0	0	0	0	0	0	0	0	0	0	0	0	0
178	2013	12	0	9000	2013-03-31	HST	177.59	29.74	28.91	28.47	28.4	29	29.49	30.15	178.06	179.21	179.06	152.05	148.96	131.97	147.42	178.62	182.41	184.79	182.36	183.82	184.33	182.74	179.38	30.13	0	0	0	0	0	0	0	0	0	0	0	0	0	0	0	0	0	0	0
178	2013	12	0	9100	2013-04-01	HST	29.98	28.96	28.46	28.29	28.62	29.58	183.06	180.37	181.9	183.71	183.44	180.15	189.62	187.27	184.96	188.96	189.25	190.42	191.93	193.96	194.73	189.53	185.08	121.12	0	0	0	0	0	0	0	0	0	0	0	0	0	0	0	0	0	0	0
178	2013	12	0	9200	2013-04-02	HST	76.6	29.41	28.96	28.79	28.93	29.88	188.96	186.29	185.55	178.93	123.57	191.74	194.06	194.76	195.47	196.59	198.07	196.5	194.58	194.43	194.02	192.16	187.01	123.25	0	0	0	0	0	0	0	0	0	0	0	0	0	0	0	0	0	0	0
178	2013	12	0	9300	2013-04-03	HST	30.22	29.29	28.8	28.59	28.68	29.79	188.23	184.62	123.14	119.43	30.46	30.26	119.25	119.39	124.01	179.07	186.34	188.24	188.95	192.09	191.39	186.81	184.67	118.75	0	0	0	0	0	0	0	0	0	0	0	0	0	0	0	0	0	0	0
178	2013	12	0	9400	2013-04-04	HST	30.17	29.17	28.82	28.81	28.9	29.96	187.54	185.33	186.56	184.38	184.56	183.74	186.52	187.72	193.35	191.43	188.43	186.34	190.59	193.99	193.64	191.86	187.55	122.98	0	0	0	0	0	0	0	0	0	0	0	0	0	0	0	0	0	0	0
178	2013	12	0	9500	2013-04-05	HST	123.03	29.36	28.75	28.81	28.82	131.27	186.28	189.86	180.61	179.06	179.04	183.09	179.05	124.93	178.98	179.29	184.74	185.18	184.38	191.91	190.95	191.42	192.52	188.08	0	0	0	0	0	0	0	0	0	0	0	0	0	0	0	0	0	0	0
178	2013	12	0	9600	2013-04-06	HST	131.33	29.57	29.13	28.75	28.78	28.95	30.13	185.38	188.46	188.2	190.26	189.47	187.87	187.2	187.57	186.3	187.84	191.48	191.98	191.69	191.22	189.51	190.13	190.26	0	0	0	0	0	0	0	0	0	0	0	0	0	0	0	0	0	0	0
178	2013	12	0	9700	2013-04-07	HST	184.66	30.34	29.56	29.32	29.26	29.55	28.77	29.5	127	188.56	189.95	191.44	124.2	30.08	30.12	121.95	179.14	189.62	192.29	195.45	194.45	193.36	189.9	186.4	0	0	0	0	0	0	0	0	0	0	0	0	0	0	0	0	0	0	0
178	2013	12	0	9800	2013-04-08	HST	184.64	30.03	29.46	29.24	29.18	30.26	176	188.69	188.88	186.22	187.88	186.69	186.55	189.15	184.9	188.19	189.42	185.26	188.61	190.51	192.65	190.7	189.3	179.43	0	0	0	0	0	0	0	0	0	0	0	0	0	0	0	0	0	0	0
178	2013	12	0	9900	2013-04-09	HST	184.34	30.17	29.5	29.24	29.46	126.99	125.28	185.46	185.97	185.35	182.33	181.95	184.29	186.55	185.84	184.83	185.9	188.35	187.18	194.17	193.82	192.85	189.85	183.04	0	0	0	0	0	0	0	0	0	0	0	0	0	0	0	0	0	0	0
178	2013	12	0	10000	2013-04-10	HST	181.88	29.88	29.83	29.56	29.54	136.81	126.32	189.35	190.12	185.93	190.13	187.2	186.52	186.6	188.99	189.24	188.91	190.77	192.76	193.85	193.66	192.47	190.44	181.22	0	0	0	0	0	0	0	0	0	0	0	0	0	0	0	0	0	0	0
178	2013	12	0	10100	2013-04-11	HST	186.17	124.34	29.83	29.53	29.61	133.85	126.37	188.48	189.43	190.06	189.3	189.27	189.6	191.28	189.57	189.02	186.49	188.91	189.67	193.75	193.86	191.41	192.56	188.47	0	0	0	0	0	0	0	0	0	0	0	0	0	0	0	0	0	0	0
178	2013	12	0	10200	2013-04-12	HST	187.7	148.74	30.22	29.96	29.95	138.99	186.13	188.72	190.88	190.37	190.78	190.21	189.52	190.69	193.11	192.75	192.44	194.32	194.64	195.44	194.93	193.98	193.45	192.25	0	0	0	0	0	0	0	0	0	0	0	0	0	0	0	0	0	0	0
178	2013	12	0	10300	2013-04-13	HST	189	184.51	150.01	30.41	30.32	30.28	184.33	190.49	193.26	191.76	193.5	191.42	192.26	191.74	192.11	192.52	192.83	194.23	194.34	193.14	193.91	192.51	191.15	190.15	0	0	0	0	0	0	0	0	0	0	0	0	0	0	0	0	0	0	0
178	2013	12	0	10400	2013-04-14	HST	189.89	185.07	131.06	30.41	30.26	127.01	179.95	186.17	191.56	192.89	190.83	191.03	190.63	189.85	190.08	191.59	191.29	192.49	192.88	194.29	193.66	191.37	189.92	182.64	0	0	0	0	0	0	0	0	0	0	0	0	0	0	0	0	0	0	0
178	2013	12	0	10500	2013-04-15	HST	180.08	30.07	29.75	29.53	29.81	185.62	190.23	191.11	190.97	191.68	192.78	191.04	188.38	187.31	30.33	190.19	192.12	193.28	194.47	195.77	195.07	193.53	190.83	183.45	0	0	0	0	0	0	0	0	0	0	0	0	0	0	0	0	0	0	0
178	2013	12	0	10600	2013-04-16	HST	184.43	77.36	29.82	29.47	29.6	149.77	179.27	190.43	184.99	187.34	189.72	189.36	190.85	189.51	189.77	193.22	192.72	193.14	194.43	195.85	194.92	192.86	191.32	183.84	0	0	0	0	0	0	0	0	0	0	0	0	0	0	0	0	0	0	0
178	2013	12	0	10700	2013-04-17	HST	187.25	144.37	30.17	29.91	30	146.7	182.81	190.13	189.7	190.75	189.44	189.4	188.8	188.88	186.89	188.92	192.67	189.38	189.77	193.39	193.54	193.27	186.31	179.2	0	0	0	0	0	0	0	0	0	0	0	0	0	0	0	0	0	0	0
178	2013	12	0	10800	2013-04-18	HST	185.3	129.49	30	29.74	30.01	184.41	188.53	189.73	188.72	189.85	189.14	188.95	189.33	189.71	189.02	190.1	189.23	190.57	193.21	194.84	194.87	192.97	190.25	184.26	0	0	0	0	0	0	0	0	0	0	0	0	0	0	0	0	0	0	0
178	2013	12	0	10900	2013-04-19	HST	183.41	126.38	29.9	29.67	30.03	183.51	190.5	189.37	190.11	192.1	193.34	192.13	192.08	191.81	191.1	192.15	191.81	188.76	193.04	193.47	193.16	192.99	193.68	191.82	0	0	0	0	0	0	0	0	0	0	0	0	0	0	0	0	0	0	0
178	2013	12	0	11000	2013-04-20	HST	188.89	184.38	135.35	30.13	30.27	137.39	185.37	189.73	192.09	193.26	187.33	187.82	187.23	184.41	189.15	190.3	192.26	192.3	193.57	194.95	195.28	194	192.31	193.06	0	0	0	0	0	0	0	0	0	0	0	0	0	0	0	0	0	0	0
178	2013	12	0	11100	2013-04-21	HST	189.53	184.83	138.03	30.32	30.21	30.42	184.67	186.37	190.37	191.38	192.81	186.71	188.97	186.7	189.94	191.47	192.01	192.11	193.03	194.83	194.67	194.18	196.32	192.11	0	0	0	0	0	0	0	0	0	0	0	0	0	0	0	0	0	0	0
178	2013	12	0	11200	2013-04-22	HST	191.72	187.66	175.36	132.66	141.38	188.19	187.38	192.31	194.16	194.14	192.53	192.75	192.67	194.14	193.62	194.18	194.24	194.27	195.96	195.07	196.21	194.45	194.32	191.57	0	0	0	0	0	0	0	0	0	0	0	0	0	0	0	0	0	0	0
178	2013	12	0	11300	2013-04-23	HST	190.98	186.56	133.83	30.41	161.65	185.05	183.97	191.61	190.74	191.59	191.3	190.23	189.99	192.12	189.76	191.53	192.1	193.03	194.63	197.06	198.06	194.9	193.17	190.09	0	0	0	0	0	0	0	0	0	0	0	0	0	0	0	0	0	0	0
178	2013	12	0	11400	2013-04-24	HST	189.76	184.92	179.12	140.23	144.59	185.93	185.26	191.65	189.59	191.46	189.43	190.91	191.81	192.13	192.85	192.94	194.99	195.2	195.32	195.83	194.39	194.91	193.59	189.88	0	0	0	0	0	0	0	0	0	0	0	0	0	0	0	0	0	0	0
178	2013	12	0	11500	2013-04-25	HST	189.85	184.75	143.63	132.46	148.99	186.44	185.16	191.56	191.35	189.37	189.13	189.42	188.16	186.85	188.89	190.15	193.21	193.64	192.74	195.83	196.56	195.04	191.55	183.59	0	0	0	0	0	0	0	0	0	0	0	0	0	0	0	0	0	0	0
178	2013	12	0	11600	2013-04-26	HST	183.44	178.71	29.93	29.69	29.8	29.41	125.97	185.98	187.67	187.95	185.9	187.91	186.35	186.12	188.29	187.59	190.28	191.18	192.65	193.45	192.42	187.12	193.09	189.86	0	0	0	0	0	0	0	0	0	0	0	0	0	0	0	0	0	0	0
178	2013	12	0	11700	2013-04-27	HST	137.39	29.68	29.06	28.59	28.96	29.5	30.35	132.83	171.54	141.89	191.12	192.6	189.96	189.87	190.98	191	194.24	197.36	195.84	198.19	197.43	193.48	190.33	188.55	0	0	0	0	0	0	0	0	0	0	0	0	0	0	0	0	0	0	0
178	2013	12	0	11800	2013-04-28	HST	182.95	30.44	29.67	29.32	29.17	29.47	30.04	148.88	186.44	189.78	190.44	179.42	179.21	179.22	179.44	185.83	190.33	191.36	193.08	195.23	195.93	193.57	189.05	185.55	0	0	0	0	0	0	0	0	0	0	0	0	0	0	0	0	0	0	0
178	2013	12	0	11900	2013-04-29	HST	185.66	144.36	29.99	29.56	29.89	180.38	179.27	189.4	189.33	189.76	189.91	191.31	189.43	190.5	192.4	193.7	195.17	196.51	198.25	196.94	198.17	194.09	189.83	185.52	0	0	0	0	0	0	0	0	0	0	0	0	0	0	0	0	0	0	0
178	2013	12	0	12000	2013-04-30	HST	186.01	149.02	30.03	29.74	30	183.92	179.26	187.59	190.18	188.53	187.37	186	186.84	189.66	191.37	192.49	193.11	195.96	196.78	197.64	198.51	195.94	191.87	184.69	0	0	0	0	0	0	0	0	0	0	0	0	0	0	0	0	0	0	0
178	2013	12	0	12100	2013-05-01	HST	185.49	30.27	29.7	29.5	29.68	182.98	188.16	190.12	189.83	185.94	177.9	183.05	182.28	183.22	184.42	191.08	192.74	192.72	193.03	194.71	195.41	193.45	190.17	184.8	0	0	0	0	0	0	0	0	0	0	0	0	0	0	0	0	0	0	0
178	2013	12	0	12200	2013-05-02	HST	186.31	122	29.79	29.68	29.81	181.52	174.46	187.79	184.65	186.44	186.36	186.34	30.37	184.2	176.99	184.99	187.41	186.49	188.24	188.92	190.98	192.6	190.36	185.93	0	0	0	0	0	0	0	0	0	0	0	0	0	0	0	0	0	0	0
178	2013	12	0	12300	2013-05-03	HST	185.49	121.2	29.77	29.5	29.6	30.37	189.31	186.03	186.09	183.63	184.62	185.87	183.78	184.27	186.17	191.57	191	191.02	189.82	192.8	192.47	191.9	193.21	192.12	0	0	0	0	0	0	0	0	0	0	0	0	0	0	0	0	0	0	0
178	2013	12	0	12400	2013-05-04	HST	185.46	129.1	29.83	29.44	29.38	29.72	179.07	187.23	188.16	190.86	189.5	182.17	184.22	187.99	189.03	189.61	183.75	187.11	187.65	189.92	190.05	191.13	192.37	190.83	0	0	0	0	0	0	0	0	0	0	0	0	0	0	0	0	0	0	0
178	2013	12	0	12500	2013-05-05	HST	186.49	175.89	30.2	29.77	29.65	29.88	124.11	183.25	188.44	190.45	189.68	181.53	181.49	185.9	183.61	184.65	186.12	189.23	191.2	193.36	193.28	191.51	187.41	182.81	0	0	0	0	0	0	0	0	0	0	0	0	0	0	0	0	0	0	0
178	2013	12	0	12600	2013-05-06	HST	180.33	30.1	29.6	29.34	29.56	132.67	187.14	187.57	184.64	186	186.95	188.16	186.08	188.19	186.32	187.86	184.38	185.96	191.34	192.65	193.39	192.64	190	180.9	0	0	0	0	0	0	0	0	0	0	0	0	0	0	0	0	0	0	0
178	2013	12	0	12700	2013-05-07	HST	182.58	30.04	29.56	29.38	29.43	30.35	119.23	185.33	182.96	184.28	185.51	186.68	185.71	187.21	187.14	190.25	189.66	190.64	193.65	194.04	194.1	191.45	188.86	183.84	0	0	0	0	0	0	0	0	0	0	0	0	0	0	0	0	0	0	0
178	2013	12	0	12800	2013-05-08	HST	183.63	30.03	29.44	29.3	29.35	127.05	190.31	188.69	186.92	189.12	183.14	178.78	183.46	186.17	190.34	190.06	191.38	193.42	193.88	194.4	195.11	193.19	188.75	173.14	0	0	0	0	0	0	0	0	0	0	0	0	0	0	0	0	0	0	0
178	2013	12	0	12900	2013-05-09	HST	117.28	30.35	29.72	29.51	29.62	133.11	186.81	186.83	189.41	189.51	189.79	189.95	191.92	193.01	193.93	193.11	194.02	194.33	195.26	195.61	196.52	194.13	191.6	185.15	0	0	0	0	0	0	0	0	0	0	0	0	0	0	0	0	0	0	0
178	2013	12	0	13000	2013-05-10	HST	172.98	183.15	128.45	30.25	30.36	183.43	173.08	189.19	183.52	184.13	186.89	189.68	185.5	188.65	186.51	192.71	194.08	190.24	192.27	190.67	193.13	189.95	196.05	193.17	0	0	0	0	0	0	0	0	0	0	0	0	0	0	0	0	0	0	0
178	2013	12	0	13100	2013-05-11	HST	189.54	186.39	180.79	144.08	147.25	179.49	186.22	190.88	189.4	145.46	191.1	117.64	30.13	172.97	172.91	187.43	187.21	190.03	192.47	193.63	193.8	190.5	194.57	192.51	0	0	0	0	0	0	0	0	0	0	0	0	0	0	0	0	0	0	0
178	2013	12	0	13200	2013-05-12	HST	186.9	183.04	124.67	30.01	29.94	176.35	184.63	186.61	190.51	193.54	192.99	184.6	184.44	183.04	184.53	185.52	187.31	188.54	192.16	194.42	196.04	195.06	193.49	187.69	0	0	0	0	0	0	0	0	0	0	0	0	0	0	0	0	0	0	0
178	2013	12	0	13300	2013-05-13	HST	177.27	185.36	179.45	137.88	182.34	186.88	191.98	191.43	185.01	117.55	117.64	173.08	169.28	172.95	172.92	185.72	193.13	194.82	195.8	198.12	199.07	196.23	192.54	184.22	0	0	0	0	0	0	0	0	0	0	0	0	0	0	0	0	0	0	0
178	2013	12	0	13400	2013-05-14	HST	181.38	184.86	181.84	176.07	181.12	186.95	191.4	194.06	182.09	173.04	184.67	179.68	182.71	184.62	185.92	193.54	193.78	191.98	192.73	195.83	198.71	196.34	192.66	186.16	0	0	0	0	0	0	0	0	0	0	0	0	0	0	0	0	0	0	0
178	2013	12	0	13500	2013-05-15	HST	120.99	184.53	180.96	179.36	180.81	186.62	191.96	188.34	190.28	183.12	185.41	185.98	184.52	185.6	191.69	191.9	190.98	194.35	195.71	197.8	197.17	194.9	192.59	185.59	0	0	0	0	0	0	0	0	0	0	0	0	0	0	0	0	0	0	0
178	2013	12	0	13600	2013-05-16	HST	118.49	30.18	29.32	29.14	29.25	30.05	173.99	190.7	189.79	185.69	184.23	181.35	181.67	183.04	180.69	193.13	190.73	189.31	194.71	193.44	193.72	194.12	194.8	186.16	0	0	0	0	0	0	0	0	0	0	0	0	0	0	0	0	0	0	0
178	2013	12	0	13700	2013-05-17	HST	115.56	29.66	29.46	28.88	29.15	29.76	118.06	187.46	188.94	137.71	120.99	173.03	173.02	173.05	173.01	179.79	185.82	190.24	191.6	188.1	190.65	189.49	195.82	193.94	0	0	0	0	0	0	0	0	0	0	0	0	0	0	0	0	0	0	0
178	2013	12	0	13800	2013-05-18	HST	190.97	185.61	180	130.1	30.39	183.05	183.29	189.29	194.53	198.56	195.38	187.42	186.37	30.29	188.71	187.6	190.73	192.4	192.26	193.48	195.3	200.39	196.43	193.97	0	0	0	0	0	0	0	0	0	0	0	0	0	0	0	0	0	0	0
178	2013	12	0	13900	2013-05-19	HST	190.68	184.87	175.49	119.48	30.29	125.05	184.25	186.62	190.82	189.58	184.96	186.1	187.79	189.61	189.92	191.5	193.1	194.89	195.07	195.32	196.88	194.36	191.98	188.16	0	0	0	0	0	0	0	0	0	0	0	0	0	0	0	0	0	0	0
178	2013	12	0	14000	2013-05-20	HST	121.15	116.84	30.1	29.55	29.85	184.9	188.11	193.82	190.49	191.43	186.41	187.86	186.72	172.91	194.03	195.06	193.44	196.28	197.07	193.89	194.52	191.79	186.71	115.9	0	0	0	0	0	0	0	0	0	0	0	0	0	0	0	0	0	0	0
178	2013	12	0	14100	2013-05-21	HST	29.86	28.95	29.57	29.32	29.47	30.37	118.8	185.1	188.24	188.88	187.35	187.1	190.32	190.8	192.46	193.86	194.86	193.97	195.96	194.1	195.83	195.29	192.05	190.95	0	0	0	0	0	0	0	0	0	0	0	0	0	0	0	0	0	0	0
178	2013	12	0	14200	2013-05-22	HST	173	115.36	30.33	30.06	30.1	116.27	185.44	191.32	192.96	194.06	195.12	194.31	195	197.04	196.63	197.63	199.5	200.68	200.61	197.71	200.04	197.95	195.85	194.21	0	0	0	0	0	0	0	0	0	0	0	0	0	0	0	0	0	0	0
178	2013	12	0	14300	2013-05-23	HST	184.77	120.38	114.05	30.33	30.43	119.07	186.37	193.56	194.32	196.64	196.71	195	195.85	195.65	194.41	195.46	200.38	196.26	197.62	196.49	199.01	198.21	195.74	193.36	0	0	0	0	0	0	0	0	0	0	0	0	0	0	0	0	0	0	0
178	2013	12	0	14400	2013-05-24	HST	184.51	119.39	30.47	30.18	30.32	119.51	186.47	193.76	194.12	193.94	194.55	193.48	193.32	191.43	192.01	194.29	196.36	196.75	195.89	195.26	195.92	196.73	198.26	194.74	0	0	0	0	0	0	0	0	0	0	0	0	0	0	0	0	0	0	0
178	2013	12	0	14500	2013-05-25	HST	191.19	187.27	183.8	179.43	182.15	184.96	188.75	191.27	195.36	195.45	192.24	184.64	179.92	173.16	172.91	183.91	189.08	190.46	192.38	193.17	195.72	193.29	195.38	190.68	0	0	0	0	0	0	0	0	0	0	0	0	0	0	0	0	0	0	0
178	2013	12	0	14600	2013-05-26	HST	187.95	182.85	176.19	142.83	142.2	181.75	30.5	181.18	187.84	188.88	189.31	30.21	30.23	29.95	29.99	117.37	172.91	186.47	189.47	190.45	192.69	193.68	191.66	185.62	0	0	0	0	0	0	0	0	0	0	0	0	0	0	0	0	0	0	0
178	2013	12	0	14700	2013-05-27	HST	119.15	30.45	29.84	29.58	29.53	29.72	29.75	30.27	120.88	173.09	173.06	116.62	115.14	115.97	115.92	172.86	186.67	191.22	194.2	195.44	197.5	195.59	195.67	188.05	0	0	0	0	0	0	0	0	0	0	0	0	0	0	0	0	0	0	0
178	2013	12	0	14800	2013-05-28	HST	120.75	29.76	29.6	29.69	29.85	115.03	178.16	180.35	194.47	194.29	196.54	195.36	193.99	194.64	195.78	190.16	191.7	195.46	194.81	194.8	195.12	191.97	196.07	190.38	0	0	0	0	0	0	0	0	0	0	0	0	0	0	0	0	0	0	0
178	2013	12	0	14900	2013-05-29	HST	30.28	115.78	30.49	30.23	30.2	115.42	183.71	191.4	193.48	194.85	194.92	198.42	199.68	198.76	197.99	197.68	198.86	197.13	197.47	195.04	195.99	198.45	200.14	195.55	0	0	0	0	0	0	0	0	0	0	0	0	0	0	0	0	0	0	0
178	2013	12	0	15000	2013-05-30	HST	184.82	172.96	119.68	117.81	118.58	116.56	184.5	192.16	193.62	194.39	195.34	194.86	195.01	189.03	186.92	190.21	189.98	193.38	193.79	193.38	194.13	195.29	199.4	194.88	0	0	0	0	0	0	0	0	0	0	0	0	0	0	0	0	0	0	0
178	2013	12	0	15100	2013-05-31	HST	183.38	118.46	112.85	30.26	30.08	115.36	173	191.06	192.59	190.97	192.15	193.08	190.66	184.96	173.01	180.36	179.59	187.9	185.88	183.9	189.08	191.33	191.33	193.91	0	0	0	0	0	0	0	0	0	0	0	0	0	0	0	0	0	0	0
178	2013	12	0	15200	2013-06-01	HST	189.45	185.92	183.81	175.93	176.41	183.36	179.98	188.18	189.34	192.5	189.18	115.49	30.38	115.98	118.26	189.32	189.27	190.04	192.49	192.91	195.4	193.09	190.71	192.78	0	0	0	0	0	0	0	0	0	0	0	0	0	0	0	0	0	0	0
178	2013	12	0	15300	2013-06-02	HST	191.01	186.31	177.23	30.42	30.12	30	30.26	144.97	185.88	189.29	142.17	30.03	114.98	116.08	30.3	116.31	118.06	115.43	172.9	185.44	190.67	189.99	186.25	183.09	0	0	0	0	0	0	0	0	0	0	0	0	0	0	0	0	0	0	0
178	2013	12	0	15400	2013-06-03	HST	182.85	30.17	29.45	29.11	29.54	30.22	184.67	172.88	185.27	187.3	171.02	183.45	119.27	120.06	171.08	182.02	186.93	186.57	184.55	188.29	190.35	189.99	188.12	186.48	0	0	0	0	0	0	0	0	0	0	0	0	0	0	0	0	0	0	0
178	2013	12	0	15500	2013-06-04	HST	186.13	181.59	126.45	30.2	30.06	173.04	119.52	171.15	185.83	182.62	177.68	171.23	171.26	186.19	186.53	187.34	188.25	187.94	188.75	186.57	189.09	190.27	187.18	179.37	0	0	0	0	0	0	0	0	0	0	0	0	0	0	0	0	0	0	0
178	2013	12	0	15600	2013-06-05	HST	115.91	29.69	28.88	28.52	28.71	29.32	29.76	115.69	114.56	170.38	118.63	116.69	170.66	170.89	184.48	181.74	170.91	182.73	186.83	170.85	189.33	188.69	184.52	181.62	0	0	0	0	0	0	0	0	0	0	0	0	0	0	0	0	0	0	0
178	2013	12	0	15700	2013-06-06	HST	181.86	152.09	30.38	30.22	30.41	181.45	185.61	170.87	184.97	30.42	183.87	182.74	186.37	175.99	177.48	184.06	186.14	186.81	188.02	189.28	187.95	187.54	188.04	185.24	0	0	0	0	0	0	0	0	0	0	0	0	0	0	0	0	0	0	0
178	2013	12	0	15800	2013-06-07	HST	182.7	185.95	184.02	180.77	181.02	186.09	30.37	185.16	187.02	187.61	189.45	188.91	188.85	187.8	187.21	186.86	187.9	190.16	188.5	190.22	189.02	188.92	191.1	189.37	0	0	0	0	0	0	0	0	0	0	0	0	0	0	0	0	0	0	0
178	2013	12	0	15900	2013-06-08	HST	186.57	182.52	144.54	128.32	123.14	179.46	182.92	186.23	188.23	187.32	183.27	170.75	170.65	118.36	120.56	170.69	184.69	182.26	186.9	187.77	188.96	188.25	187.77	190.51	0	0	0	0	0	0	0	0	0	0	0	0	0	0	0	0	0	0	0
178	2013	12	0	16000	2013-06-09	HST	187.29	184.08	180.9	174.48	174.4	179.26	183.32	184.69	186.56	187.63	188.86	187.15	170.63	120.15	120.03	170.84	185.93	188.79	189.75	190.18	191.75	190.41	189.26	187.55	0	0	0	0	0	0	0	0	0	0	0	0	0	0	0	0	0	0	0
178	2013	12	0	16100	2013-06-10	HST	188.01	184.96	181.79	179.99	181.16	184.81	180.41	186.53	188.36	189.65	188.76	190.19	191.76	187.61	189.85	189.2	188.65	189.16	189.49	189.98	190.9	189.3	185.79	180.93	0	0	0	0	0	0	0	0	0	0	0	0	0	0	0	0	0	0	0
178	2013	12	0	16200	2013-06-11	HST	181.72	178.56	134.45	121.38	139.34	181.81	119.23	180.17	183.34	185.93	188	183.71	185.67	189.01	186.06	187.45	190.07	192.01	193.5	190.71	193.91	194.16	191.14	188.67	0	0	0	0	0	0	0	0	0	0	0	0	0	0	0	0	0	0	0
178	2013	12	0	16300	2013-06-12	HST	189.91	185.72	180	181.28	181.4	186.41	181.3	187.31	188.96	188.75	187.61	186.76	187.65	192.34	191.85	191.95	193.45	192.31	192.23	191.04	192.59	191.46	189.05	184.77	0	0	0	0	0	0	0	0	0	0	0	0	0	0	0	0	0	0	0
178	2013	12	0	16400	2013-06-13	HST	118.9	113.76	29.76	29.25	29.17	30.44	117.44	185.05	187.89	191.49	185.08	184.97	185.82	186.59	181.61	187.26	188.71	190.31	190.73	190.57	191.57	190.64	187.54	182.23	0	0	0	0	0	0	0	0	0	0	0	0	0	0	0	0	0	0	0
178	2013	12	0	16500	2013-06-14	HST	170.61	30.27	29.42	28.93	29.34	30	117.67	183.14	185.83	185.97	189.56	183.7	184.19	182.17	186.12	186.34	186.57	188.06	190.23	190.62	192.1	190.81	192.63	190.96	0	0	0	0	0	0	0	0	0	0	0	0	0	0	0	0	0	0	0
178	2013	12	0	16600	2013-06-15	HST	187.03	181.71	143.64	30.32	30.07	30.27	29.76	176.44	189.26	186.65	184.68	115.16	113.65	30.03	29.97	114.53	170.6	184.63	184.98	187.92	190.3	189.14	193.11	191.06	0	0	0	0	0	0	0	0	0	0	0	0	0	0	0	0	0	0	0
178	2013	12	0	16700	2013-06-16	HST	187.26	182.56	177.93	129.15	129.9	175.6	180.35	147.53	184.54	188.05	118.05	117.08	116.3	115.29	120.15	170.58	181.29	187.83	189.44	189.8	191.48	189.14	187.49	176.82	0	0	0	0	0	0	0	0	0	0	0	0	0	0	0	0	0	0	0
178	2013	12	0	16800	2013-06-17	HST	119.99	30.04	29.47	29.39	29.33	30.2	179.49	186.67	187.51	186.73	190.26	187.54	188.87	188.32	184.37	183.24	186.74	190.69	191.33	190.47	191.43	190.77	190.49	183.06	0	0	0	0	0	0	0	0	0	0	0	0	0	0	0	0	0	0	0
178	2013	12	0	16900	2013-06-18	HST	170.62	30.2	29.55	29.33	29.54	30.44	179.79	187.43	189.93	182.58	185.58	186.07	186.85	187.26	187.44	187.58	189.22	187.75	190.8	191.24	191.97	189.89	189.84	185.74	0	0	0	0	0	0	0	0	0	0	0	0	0	0	0	0	0	0	0
178	2013	12	0	17000	2013-06-19	HST	170.6	112.57	30.22	29.9	30.18	115.44	118.95	186.72	188.55	189.13	189.24	188.1	188.43	188.49	187.74	188.27	189.32	190.03	190.01	189.81	191.89	191.18	189.54	186.39	0	0	0	0	0	0	0	0	0	0	0	0	0	0	0	0	0	0	0
178	2013	12	0	17100	2013-06-20	HST	170.71	114.11	30.21	29.91	29.88	113.16	179.48	186.45	187.98	187.8	189.27	188.13	189.07	188.37	188.78	189.42	190.38	190.6	190.39	189.62	190.81	190.56	189.3	186.04	0	0	0	0	0	0	0	0	0	0	0	0	0	0	0	0	0	0	0
178	2013	12	0	17200	2013-06-21	HST	170.73	114.08	30.22	29.61	29.69	110.51	119.74	181.93	186.02	186.94	184.6	180.57	183.48	183.82	183.14	185.61	185.66	188.82	186.57	187.33	186.31	187.56	184.32	188.83	0	0	0	0	0	0	0	0	0	0	0	0	0	0	0	0	0	0	0
178	2013	12	0	17300	2013-06-22	HST	185.39	181.77	130.46	30.21	30.25	180.55	30.35	184.97	187.83	188.67	187.97	30.15	29.81	30.16	29.89	30.02	118.51	182.55	187.9	187.95	190.09	189.01	190.41	187.12	0	0	0	0	0	0	0	0	0	0	0	0	0	0	0	0	0	0	0
178	2013	12	0	17400	2013-06-23	HST	183.22	140.1	29.79	29.49	29.46	29.89	29.96	172.53	183.49	182	118.13	116.83	170.69	170.62	170.77	179.4	182.17	185.55	189.42	190.17	191.25	186.64	185.81	179.33	0	0	0	0	0	0	0	0	0	0	0	0	0	0	0	0	0	0	0
178	2013	12	0	17500	2013-06-24	HST	181.07	132.77	30	29.81	29.97	178.85	30.36	170.72	185.61	186.42	186.51	186.49	187.38	182.69	184.38	187.31	187.72	188.06	189.03	189.36	191.93	188.65	188.76	188.62	0	0	0	0	0	0	0	0	0	0	0	0	0	0	0	0	0	0	0
178	2013	12	0	17600	2013-06-25	HST	188.75	185.63	179.83	147.03	147.58	184.6	117.3	186.77	188.77	187.85	187.99	187.67	187.9	187.76	187.9	189.07	189.74	190.85	191.71	191.63	192.97	192.21	189.99	187.02	0	0	0	0	0	0	0	0	0	0	0	0	0	0	0	0	0	0	0
178	2013	12	0	17700	2013-06-26	HST	170.67	112.28	29.77	29.91	30.04	114.19	170.63	187.48	188.81	188.96	188.07	187.81	187.68	188.58	188.73	189.89	189.76	191.38	192.62	190.01	193.73	191.25	190.1	187.78	0	0	0	0	0	0	0	0	0	0	0	0	0	0	0	0	0	0	0
178	2013	12	0	17800	2013-06-27	HST	170.93	114.58	30.34	30	30.08	114.21	118.51	186.83	188.94	188.65	191.01	189.24	189.16	189.34	189.33	189.72	189.43	190.4	191.06	191.73	192.17	198.31	189.97	187.22	0	0	0	0	0	0	0	0	0	0	0	0	0	0	0	0	0	0	0
178	2013	12	0	17900	2013-06-28	HST	170.86	113.86	30.12	30.01	29.92	111.22	119.59	186.93	189.67	189.61	191.21	190.4	188.97	190.58	189.43	188.26	189.53	190.7	191.66	190.71	192.03	191.65	193.66	191.6	0	0	0	0	0	0	0	0	0	0	0	0	0	0	0	0	0	0	0
178	2013	12	0	18000	2013-06-29	HST	187.31	185.14	180.13	123.53	30.28	181.13	178.41	186.99	190.62	191.01	188.1	183.24	180.11	176.15	170.38	155.46	173.29	186.21	187.01	87.88	191.34	190.97	191.06	190.21	0	0	0	0	0	0	0	0	0	0	0	0	0	0	0	0	0	0	0
178	2013	12	0	18100	2013-06-30	HST	189.99	187.34	185.13	179.89	179.47	181.5	178.02	186.61	189.53	191.11	189.18	187.53	170.65	118.65	117.4	117.4	181.91	188.47	190.94	191.85	194.41	193.92	189.86	186.26	0	0	0	0	0	0	0	0	0	0	0	0	0	0	0	0	0	0	0
178	2013	12	0	18200	2013-07-01	HST	179.57	117.4	113.2	29.98	30.35	118.59	184.22	188.87	190.45	188.89	188.56	187.82	187.14	187.71	188.44	187.25	186.89	188.69	188.15	187.45	189.43	189.93	189.21	185.77	0	0	0	0	0	0	0	0	0	0	0	0	0	0	0	0	0	0	0
178	2013	12	0	18300	2013-07-02	HST	173.96	117.16	113.67	30.5	30.61	120.6	181.42	186.71	187.92	182.75	183.49	178.76	179.13	174.05	173.86	182.85	186.18	183.59	186.05	188.29	190.32	189.59	188.73	185.42	0	0	0	0	0	0	0	0	0	0	0	0	0	0	0	0	0	0	0
178	2013	12	0	18400	2013-07-03	HST	170.68	112.8	30.18	29.91	30.04	113.41	177.15	184.33	186.88	188.2	189.15	183.49	184.59	184.4	181.56	184.66	186.85	187.61	188.82	190.22	188.99	190.04	191.24	183.86	0	0	0	0	0	0	0	0	0	0	0	0	0	0	0	0	0	0	0
178	2013	12	0	18500	2013-07-04	HST	171.87	115.74	30.29	29.86	29.8	30.06	30.59	119.69	172.77	179.55	182.42	182.38	181.47	182.29	183.57	186.6	188.06	189.35	190.67	190	190.32	188.72	187.62	180.14	0	0	0	0	0	0	0	0	0	0	0	0	0	0	0	0	0	0	0
178	2013	12	0	18600	2013-07-05	HST	120.91	30.6	29.9	29.57	29.59	30.26	120.52	183.48	187.43	189.51	193.08	189.58	188.12	190.25	190.89	192.64	190.28	193.27	195.72	195.22	196.9	193.96	191.32	192.87	0	0	0	0	0	0	0	0	0	0	0	0	0	0	0	0	0	0	0
178	2013	12	0	18700	2013-07-06	HST	187.07	180.13	145.06	30.42	30.29	30.49	177.34	184.32	187.8	190.16	186.3	179.62	180.64	185.03	182.99	184.29	185.35	186.46	188.61	192.03	190.37	191.74	188.15	191.02	0	0	0	0	0	0	0	0	0	0	0	0	0	0	0	0	0	0	0
178	2013	12	0	18800	2013-07-07	HST	184.94	178.76	128.59	30.4	30.27	30.4	134.99	179.44	184.7	188.19	190	185.67	174.16	187.89	186.98	187.3	190.08	192.92	190.91	192.26	194.95	192.9	195.06	189.61	0	0	0	0	0	0	0	0	0	0	0	0	0	0	0	0	0	0	0
178	2013	12	0	18900	2013-07-08	HST	183.23	171.8	115.87	112.9	113.93	171.78	183.51	188.69	187.11	188.53	188.42	189.71	190.52	193.05	189.65	188.84	191.3	188.68	189.74	191.16	193.45	193.8	190.89	190.3	0	0	0	0	0	0	0	0	0	0	0	0	0	0	0	0	0	0	0
178	2013	12	0	19000	2013-07-09	HST	184.81	171.91	120.64	115.38	114	120.97	181.2	188.11	182.83	187.12	186.92	178.9	186.44	185.89	187.52	188.53	188.25	192.8	196.03	196.44	194.19	193.49	191.35	188.94	0	0	0	0	0	0	0	0	0	0	0	0	0	0	0	0	0	0	0
178	2013	12	0	19100	2013-07-10	HST	180.93	117.1	116.8	115.98	118.45	171.86	182.58	185.76	185.82	179.97	180.67	179.65	179.34	177.89	181.17	184.85	190.37	190.55	190.82	189.7	191.61	191.83	187.48	181.88	0	0	0	0	0	0	0	0	0	0	0	0	0	0	0	0	0	0	0
178	2013	12	0	19200	2013-07-11	HST	172.03	113.76	30.35	29.96	30.12	114.8	171.8	184.42	181.27	180.91	184.56	182.11	180.75	179.08	180.96	183.09	186.85	189.81	188.26	190.31	191.09	188.63	184.2	171.98	0	0	0	0	0	0	0	0	0	0	0	0	0	0	0	0	0	0	0
178	2013	12	0	19300	2013-07-12	HST	115.31	30.58	30.31	29.66	29.87	30.53	171.89	30.59	30.36	30.53	175.7	30.22	30.01	117.86	119.84	171.84	180.25	177.62	183.97	185.1	189.42	190.62	192.05	189.47	0	0	0	0	0	0	0	0	0	0	0	0	0	0	0	0	0	0	0
178	2013	12	0	19400	2013-07-13	HST	184.81	181.81	177.89	30.38	30.55	180.27	175.19	187.13	185.08	185	183.82	138.96	136.24	130.21	30.52	30.34	188.1	117.31	179.8	182.12	184.36	178.9	188.19	183.24	0	0	0	0	0	0	0	0	0	0	0	0	0	0	0	0	0	0	0
178	2013	12	0	19500	2013-07-14	HST	179.54	122.09	30.39	29.97	29.87	29.85	30.52	30.05	30.02	131.18	30.53	111.53	112.72	111.4	114.46	116.82	171.91	182.42	185.63	182.11	184.69	182.8	182.44	178.16	0	0	0	0	0	0	0	0	0	0	0	0	0	0	0	0	0	0	0
178	2013	12	0	19600	2013-07-15	HST	178.99	172.26	146.38	30.55	30.39	176.15	120.76	172.03	179.97	116.5	116.57	30.44	30.48	114.34	117.28	119.58	171.91	185.12	185.82	187.25	187.18	188.1	185.87	172	0	0	0	0	0	0	0	0	0	0	0	0	0	0	0	0	0	0	0
178	2013	12	0	19700	2013-07-16	HST	180.19	177.99	30.52	30.07	30.17	136.2	120.05	171.87	179.75	171.98	178.31	118.11	116.55	114.58	114.99	119.03	184.65	185.67	183.8	184.39	186.95	187.91	181.46	180.75	0	0	0	0	0	0	0	0	0	0	0	0	0	0	0	0	0	0	0
178	2013	12	0	19800	2013-07-17	HST	181.68	134.04	29.92	29.48	29.69	30.44	29.98	171.75	171.75	116.14	115.17	119.15	119.16	118.8	136.38	171.79	179.89	185.3	187.02	186.35	188.94	188.51	184.91	183.5	0	0	0	0	0	0	0	0	0	0	0	0	0	0	0	0	0	0	0
178	2013	12	0	19900	2013-07-18	HST	114.2	30.41	29.85	29.17	29.04	29.86	113.43	180.79	182.5	175.3	178.78	184.07	183.17	182.9	183.59	185.17	185.38	187.66	186.8	183.46	186.74	188.48	188.58	187.39	0	0	0	0	0	0	0	0	0	0	0	0	0	0	0	0	0	0	0
178	2013	12	0	20000	2013-07-19	HST	186.97	185.04	180.56	178.24	178.51	183.44	120.43	183.23	171.96	171.02	179.27	171.82	171.91	171.82	116.92	115.27	119.47	183.28	184.47	179.21	179.95	171.94	190.59	189.41	0	0	0	0	0	0	0	0	0	0	0	0	0	0	0	0	0	0	0
178	2013	12	0	20100	2013-07-20	HST	186.17	181.96	142.84	30.64	30.29	121.27	120.79	183.35	186.52	184.79	30.47	30.19	30.39	30.29	30.25	111.88	117.25	171.83	184.09	184.35	185.87	186.32	189.14	186.3	0	0	0	0	0	0	0	0	0	0	0	0	0	0	0	0	0	0	0
178	2013	12	0	20200	2013-07-21	HST	183.06	142.27	123.14	30.15	30.08	30.52	30.52	30.14	175.99	184.24	182.47	30.54	30.45	111.51	112.81	116.5	171.85	184.82	186.84	187.27	190.06	187.78	189.2	179.87	0	0	0	0	0	0	0	0	0	0	0	0	0	0	0	0	0	0	0
178	2013	12	0	20300	2013-07-22	HST	184.42	177.81	123.16	30.48	171.77	179.59	116.5	182.69	186.31	187.66	187.15	187.42	187.12	187.22	187.55	187.33	185.55	187.43	192.58	191.86	195.46	192.02	188.58	186.51	0	0	0	0	0	0	0	0	0	0	0	0	0	0	0	0	0	0	0
178	2013	12	0	20400	2013-07-23	HST	177.62	118.3	112.37	30.42	30.44	116.94	171.8	185.45	184.52	185.5	187.41	184.91	171.89	171.85	171.75	177.24	184.97	187.78	189.15	189.83	190.85	189.1	186.58	184.47	0	0	0	0	0	0	0	0	0	0	0	0	0	0	0	0	0	0	0
178	2013	12	0	20500	2013-07-24	HST	171.79	112.4	30.36	30.18	30.32	113.6	176.76	180.69	184.48	184.37	184.22	184.66	184.95	184.86	183.29	185.95	189.68	185.01	189.36	189.78	192.53	189.76	189.06	185.19	0	0	0	0	0	0	0	0	0	0	0	0	0	0	0	0	0	0	0
178	2013	12	0	20600	2013-07-25	HST	171.88	113.74	30.32	29.92	29.98	112.38	172.07	180.9	184.38	185.2	185.39	184.91	184.79	184.54	184.33	184.93	187.89	184.87	184.84	185.16	189.45	188.78	185.85	183.78	0	0	0	0	0	0	0	0	0	0	0	0	0	0	0	0	0	0	0
178	2013	12	0	20700	2013-07-26	HST	117.81	114.89	30.35	30.1	30.02	113.27	119.79	172.03	179.26	171.84	171.83	171.76	171.86	171.76	183.25	183.82	185.43	185.63	184.69	183.94	184.86	187.17	188.71	187.01	0	0	0	0	0	0	0	0	0	0	0	0	0	0	0	0	0	0	0
178	2013	12	0	20800	2013-07-27	HST	184.89	183.45	181.55	179.34	179.1	180.59	181.89	185.25	186.35	186.15	120.37	171.73	171.5	171.93	171.97	179.76	184.27	184.36	182.45	184.66	188.75	186.98	185.86	187.32	0	0	0	0	0	0	0	0	0	0	0	0	0	0	0	0	0	0	0
178	2013	12	0	20900	2013-07-28	HST	186.4	185.2	183.2	179.92	138.57	177.78	180.45	180.02	183.62	182.25	184.64	117.28	30.58	114.75	118.8	171.72	182.1	185.72	187.47	188.7	188.84	188.44	186.73	182.27	0	0	0	0	0	0	0	0	0	0	0	0	0	0	0	0	0	0	0
178	2013	12	0	21000	2013-07-29	HST	169.91	30.61	29.91	29.68	30.16	113.72	177.91	181.57	181.74	178.4	180.21	179.59	120.19	119.24	182.69	181.98	181.02	185.56	188.75	189.86	189.91	188.53	185.46	185.02	0	0	0	0	0	0	0	0	0	0	0	0	0	0	0	0	0	0	0
178	2013	12	0	21100	2013-07-30	HST	177.5	29.58	29.63	29.32	29.8	111.8	182.14	185.59	186.38	186.57	182.3	186.79	186.43	184.04	180.63	180.94	185.8	184.95	188.71	189.65	189.6	189.06	188.41	186.4	0	0	0	0	0	0	0	0	0	0	0	0	0	0	0	0	0	0	0
178	2013	12	0	21200	2013-07-31	HST	179.84	114.91	30.59	30.11	30.26	30.54	180.15	184.59	183.98	183.61	180.05	183.38	177.89	173.67	179.51	168.23	180.04	183.77	184.45	184.48	187.92	184.79	184.7	187.02	0	0	0	0	0	0	0	0	0	0	0	0	0	0	0	0	0	0	0
178	2013	12	0	21300	2013-08-01	HST	183.44	114.14	112.34	30.58	112.07	117.31	184.71	186.71	187.47	188.35	185.3	187.97	191.58	189.44	188.88	189.61	193.97	196.22	196.73	197.09	199.01	196.46	195.95	196.02	0	0	0	0	0	0	0	0	0	0	0	0	0	0	0	0	0	0	0
178	2013	12	0	21400	2013-08-02	HST	191.47	185.11	114.61	111.02	112.95	182.82	192.18	195.72	194.28	192.13	192.5	191.83	191.68	182.53	193.16	194.64	191.67	194.99	196.63	196.86	198.1	196.55	198.71	196.22	0	0	0	0	0	0	0	0	0	0	0	0	0	0	0	0	0	0	0
178	2013	12	0	21500	2013-08-03	HST	194.96	192.42	190.51	187.46	189.73	189.39	191.26	193.29	196.13	197.84	195.31	190.33	188.56	189.42	188.83	190.74	192.71	194.7	195.73	196.63	197.32	196.62	200.46	196.42	0	0	0	0	0	0	0	0	0	0	0	0	0	0	0	0	0	0	0
178	2013	12	0	21600	2013-08-04	HST	195.12	192.85	190.8	188.09	187.81	188.23	187.63	191.98	194.23	195.81	191.89	168.67	168.64	168.73	168.79	187.52	192.83	194.79	196.37	197.42	197.11	196.19	195.11	192.13	0	0	0	0	0	0	0	0	0	0	0	0	0	0	0	0	0	0	0
178	2013	12	0	21700	2013-08-05	HST	183.48	115.54	111.57	30.6	109.44	116.96	190.88	193.77	192.78	192.12	190.04	168	167.95	192.41	192.39	194.63	194.79	196.31	196.17	194.32	197.37	196.37	196.62	193.37	0	0	0	0	0	0	0	0	0	0	0	0	0	0	0	0	0	0	0
178	2013	12	0	21800	2013-08-06	HST	184.38	114.94	111.55	109.39	112.03	167.75	191.09	196.54	193.81	194.04	194.15	194.18	194.18	193.25	193.41	194.65	196.27	197.89	196.5	196.69	197.74	197.42	197.59	194.54	0	0	0	0	0	0	0	0	0	0	0	0	0	0	0	0	0	0	0
178	2013	12	0	21900	2013-08-07	HST	189.11	117.85	111.48	30.68	109.35	117.02	167.87	193.17	192.7	167.97	182.9	183.09	185.11	182.79	192.94	195.63	195.83	196.56	198.07	198	197.6	197.49	196.56	193.8	0	0	0	0	0	0	0	0	0	0	0	0	0	0	0	0	0	0	0
178	2013	12	0	22000	2013-08-08	HST	187.55	117.4	110.33	30.68	109.45	116.97	189.62	194.61	194.62	194.79	195.23	194.18	193.44	194.06	192.89	195.75	196.23	197.92	197.79	196.97	197.68	197.12	196.74	194.43	0	0	0	0	0	0	0	0	0	0	0	0	0	0	0	0	0	0	0
178	2013	12	0	22100	2013-08-09	HST	184.94	167.78	114.52	110.29	110.45	113.9	183.46	193.58	193.68	193.75	193	191.74	194.45	195.15	192.27	193.22	195.93	196.55	196.49	196.63	196.9	195.71	194.88	195.2	0	0	0	0	0	0	0	0	0	0	0	0	0	0	0	0	0	0	0
178	2013	12	0	22200	2013-08-10	HST	195.5	194.89	191.52	191.73	191.44	187.61	191.84	192.67	194.17	194.89	194.89	194.47	194.28	195.12	193.54	194.57	195.92	197.73	198.84	195.07	195.42	195.91	197.01	195.53	0	0	0	0	0	0	0	0	0	0	0	0	0	0	0	0	0	0	0
178	2013	12	0	22300	2013-08-11	HST	194.08	192.32	188.12	188.61	183.57	188.52	189.8	191.3	194.06	194.08	190.07	187.16	167.98	184.76	187.58	191	193.35	195.2	196.99	198.83	197.82	197.31	196.79	194.64	0	0	0	0	0	0	0	0	0	0	0	0	0	0	0	0	0	0	0
178	2013	12	0	22400	2013-08-12	HST	185.95	118.04	111.56	30.61	109.9	167.76	192.2	194.86	192.77	193.35	193.16	190.92	193.08	193.79	193.06	193.83	194.82	195.65	197.61	197.44	198.82	197.62	195.29	192.62	0	0	0	0	0	0	0	0	0	0	0	0	0	0	0	0	0	0	0
178	2013	12	0	22500	2013-08-13	HST	168.01	112.51	30.59	30.23	30.19	114.68	189.93	193.15	192.45	192.4	189.21	188.32	191.07	192.29	192.75	192.58	194.76	195.92	196.67	197.88	196.79	196.34	196.07	193.25	0	0	0	0	0	0	0	0	0	0	0	0	0	0	0	0	0	0	0
178	2013	12	0	22600	2013-08-14	HST	167.92	113.39	30.57	30.53	30.29	114.08	188.18	191.96	167.71	115.42	114.87	167.74	167.73	167.83	167.89	188	190.05	194.22	194.01	194.99	195.59	195.29	195.86	194.46	0	0	0	0	0	0	0	0	0	0	0	0	0	0	0	0	0	0	0
178	2013	12	0	22700	2013-08-15	HST	167.89	114.31	109.82	30.56	109.75	116.01	190.02	193.95	192.66	190.82	192.54	190.99	191.71	194.71	193.29	194.88	194.85	195.5	196.08	196.55	197.97	195.63	194.49	190.62	0	0	0	0	0	0	0	0	0	0	0	0	0	0	0	0	0	0	0
178	2013	12	0	22800	2013-08-16	HST	176.94	118.44	116.53	112.02	113.77	118.28	191.55	195.05	194.22	192.53	192.24	192.39	193.69	191.07	191.56	193.32	194.33	196.42	196.29	195.2	195.59	196.03	194.89	195.54	0	0	0	0	0	0	0	0	0	0	0	0	0	0	0	0	0	0	0
178	2013	12	0	22900	2013-08-17	HST	194	191.47	188.86	188.45	187.54	189.57	191.62	192.19	193.57	192.28	192.61	185.88	179.06	183.44	178.62	186.5	191.78	194.53	194.06	195.12	195.74	196.02	194.74	195.91	0	0	0	0	0	0	0	0	0	0	0	0	0	0	0	0	0	0	0
178	2013	12	0	23000	2013-08-18	HST	193.63	189.91	187.93	186.32	184.52	184.41	189.3	191.37	192.27	193.85	194.61	182.21	187.4	187.94	189.97	191.74	193.94	194.75	196.4	197.96	196.79	197.15	192.23	191.78	0	0	0	0	0	0	0	0	0	0	0	0	0	0	0	0	0	0	0
178	2013	12	0	23100	2013-08-19	HST	184.05	116.16	110.55	30.4	30.65	116.12	191.06	194.79	193.93	192.73	192.92	191.95	191.44	191.73	194.15	195.83	196.43	197.58	200.12	200.87	198.28	197.29	200.86	196.74	0	0	0	0	0	0	0	0	0	0	0	0	0	0	0	0	0	0	0
178	2013	12	0	23200	2013-08-20	HST	187.93	167.73	114.46	111.45	112.26	167.75	192.1	190.64	167.84	113.99	116.62	111.85	117.65	195.52	196.23	197.16	198.28	200.54	203.5	201.54	202.81	198.34	200.81	196.87	0	0	0	0	0	0	0	0	0	0	0	0	0	0	0	0	0	0	0
178	2013	12	0	23300	2013-08-21	HST	189.98	167.73	113.67	110.95	111.71	167.7	191.74	195.45	195.23	195.95	197.15	196.03	196.49	195.9	196.7	197.67	200.4	198.47	199	199.52	200.38	200.35	197.05	195.24	0	0	0	0	0	0	0	0	0	0	0	0	0	0	0	0	0	0	0
178	2013	12	0	23400	2013-08-22	HST	189.8	167.72	113.52	110.5	110.54	117.2	191.81	194.28	114.56	110.51	195.67	196.17	195.26	195.59	195.07	196.76	198.19	197.51	198.83	199.09	197.95	197.48	197.47	194.29	0	0	0	0	0	0	0	0	0	0	0	0	0	0	0	0	0	0	0
178	2013	12	0	23500	2013-08-23	HST	190.78	168.01	116.25	113.13	114.43	167.86	192.1	194.58	195.94	196.42	195.08	194.72	193.92	193.91	193.8	195.72	197.13	198.07	199.99	200.63	199.74	197.59	197.42	196.96	0	0	0	0	0	0	0	0	0	0	0	0	0	0	0	0	0	0	0
178	2013	12	0	23600	2013-08-24	HST	194.76	192.79	191.39	189.33	190.79	190.96	193.39	194.39	196.28	196.07	196.62	196.66	195.97	195.49	196.66	195.29	196.41	199.01	199.23	200.89	200.31	195.27	196.98	195.98	0	0	0	0	0	0	0	0	0	0	0	0	0	0	0	0	0	0	0
178	2013	12	0	23700	2013-08-25	HST	194.29	192.69	190.3	183.44	126.47	184.74	190.83	192.22	192.08	193.72	192.43	190.96	190.6	190.7	191.9	193.96	194.94	196.11	197.84	195.9	197.08	195.7	194.83	192.06	0	0	0	0	0	0	0	0	0	0	0	0	0	0	0	0	0	0	0
178	2013	12	0	23800	2013-08-26	HST	184.09	117.53	110.42	30.58	109.33	167.7	191.12	193.82	195.47	194.66	194.71	193.38	192.03	193.07	191.32	192.91	194.58	192.88	196.42	197.91	197.65	196.23	196.01	194.87	0	0	0	0	0	0	0	0	0	0	0	0	0	0	0	0	0	0	0
178	2013	12	0	23900	2013-08-27	HST	185.34	117.18	111.55	108.83	110.18	167.77	168.01	196.11	194.88	194.35	194.6	194.49	194.25	194.49	195.24	193.96	196.13	196.93	199.73	198.64	199.45	198.48	196.07	194.93	0	0	0	0	0	0	0	0	0	0	0	0	0	0	0	0	0	0	0
178	2013	12	0	24000	2013-08-28	HST	189.73	167.71	112.18	109.31	109.51	167.72	191.2	194.39	194.87	193.16	194.08	193.56	194.14	195.6	196.75	197.66	196.97	196.14	195.58	196.36	201.61	197.38	195.99	193.53	0	0	0	0	0	0	0	0	0	0	0	0	0	0	0	0	0	0	0
178	2013	12	0	24100	2013-08-29	HST	187.82	167.78	114.67	111.12	112.51	167.81	192.87	195.21	195.9	195.72	195.42	195.25	194.01	193.84	196.05	196.35	196.37	198.03	199.87	197.94	197.44	199.51	196.29	195.22	0	0	0	0	0	0	0	0	0	0	0	0	0	0	0	0	0	0	0
178	2013	12	0	24200	2013-08-30	HST	188.39	167.71	114.58	111.51	112.47	167.78	192.09	197.16	196.97	199.2	196.54	189.63	189.47	187.21	188.91	193.03	194.5	195.43	196.4	195.92	196.23	196.37	194.72	196.09	0	0	0	0	0	0	0	0	0	0	0	0	0	0	0	0	0	0	0
178	2013	12	0	24300	2013-08-31	HST	193.87	192.08	189.45	188.77	186.05	190.07	191.27	192.53	194.07	195.62	192.99	188.19	189.69	186.82	191.9	192.95	194.75	195.9	195.02	196.73	196.71	195.44	194.56	197.14	0	0	0	0	0	0	0	0	0	0	0	0	0	0	0	0	0	0	0
178	2013	12	0	24400	2013-09-01	HST	195.78	193.43	191.31	187.35	186.92	186.41	191.28	192.45	193.46	192.28	191.23	188.34	167.86	187.38	186.88	189.02	191.24	193.07	194.27	195.92	195.9	195.18	195.03	193.59	0	0	0	0	0	0	0	0	0	0	0	0	0	0	0	0	0	0	0
178	2013	12	0	24500	2013-09-02	HST	184.71	167.7	110.3	30.63	30.53	30.55	114.87	167.72	167.87	185.72	182.79	186.78	181.32	30.45	30.53	191.47	193.62	194.72	196.6	197	197.11	194.92	193.4	191.03	0	0	0	0	0	0	0	0	0	0	0	0	0	0	0	0	0	0	0
178	2013	12	0	24600	2013-09-03	HST	168.04	114.23	108.97	30.5	30.53	116.08	190.79	195.64	193.31	193.48	177.32	176.02	174.12	177.29	174.05	175.24	177.46	179.56	176.72	180.75	181.05	178.89	175.45	177	0	0	0	0	0	0	0	0	0	0	0	0	0	0	0	0	0	0	0
178	2013	12	0	24700	2013-09-04	HST	164.95	112.26	106.83	30.45	30.57	113.65	173.45	175.98	176.04	175.02	174.74	173.69	174.74	176.33	176.36	178.46	178.58	179.52	180.14	183.1	182.86	179.91	178.02	177.17	0	0	0	0	0	0	0	0	0	0	0	0	0	0	0	0	0	0	0
178	2013	12	0	24800	2013-09-05	HST	169.44	113.06	108.06	30.39	30.38	113.01	173.08	176.49	177.58	175.4	175.21	176.19	176.2	177.6	177.32	178.31	179.56	179.23	179.85	180.96	179.92	179.24	179.97	175.37	0	0	0	0	0	0	0	0	0	0	0	0	0	0	0	0	0	0	0
178	2013	12	0	24900	2013-09-06	HST	168.44	168.2	116.42	113.6	113.69	168.17	176.24	179.74	179.56	181.89	181.54	180.32	179.94	180.79	178.95	179.96	179.06	180.38	182.82	187.16	185.4	183.57	184.94	180.67	0	0	0	0	0	0	0	0	0	0	0	0	0	0	0	0	0	0	0
178	2013	12	0	25000	2013-09-07	HST	179.41	177.03	173.91	171.66	171.36	173.42	177.27	181.35	179.38	180.48	176.81	179.45	175.5	174.51	176.8	176.91	178.74	179.68	183.66	185.28	183.11	181.27	183.35	182.13	0	0	0	0	0	0	0	0	0	0	0	0	0	0	0	0	0	0	0
178	2013	12	0	25100	2013-09-08	HST	178.14	175.38	174.58	168.72	168.11	169.62	174.77	176.22	178.04	179.48	179.55	171.81	173.23	174.06	176.31	177.86	179.4	180.9	183.99	183.41	183.69	179.82	183.29	178.55	0	0	0	0	0	0	0	0	0	0	0	0	0	0	0	0	0	0	0
178	2013	12	0	25200	2013-09-09	HST	172.45	168.25	116.78	112.78	112.72	168.18	175.84	178.17	177.93	179.01	178.71	178.57	178.29	180.1	180.7	178.49	181.01	185.36	187.19	191.66	187.33	180.52	181.62	177.59	0	0	0	0	0	0	0	0	0	0	0	0	0	0	0	0	0	0	0
178	2013	12	0	25300	2013-09-10	HST	170.68	168.14	115.74	112.95	113.9	168.14	173.6	178.13	175.72	179.86	180.15	179.01	178.46	178.63	179.63	180.48	183.06	180.44	186.8	187.67	183.57	183.38	182.72	178.56	0	0	0	0	0	0	0	0	0	0	0	0	0	0	0	0	0	0	0
178	2013	12	0	25400	2013-09-11	HST	174.4	168.27	161.29	114.97	116.84	168.27	176.35	178.92	177.89	179.67	179.73	180.9	179.77	181.38	183.48	182.08	183.71	187.1	190.85	190.1	187.16	185.61	184.79	177.28	0	0	0	0	0	0	0	0	0	0	0	0	0	0	0	0	0	0	0
178	2013	12	0	25500	2013-09-12	HST	175.65	168.36	161.4	116.41	117.61	168.28	176.48	179.56	178.5	182.57	182.68	182.52	182.63	180.18	179.11	179.66	183.64	184.44	186.82	190.43	187.16	186.3	179.5	179.54	0	0	0	0	0	0	0	0	0	0	0	0	0	0	0	0	0	0	0
178	2013	12	0	25600	2013-09-13	HST	176.63	168.33	162.05	116.09	117.25	168.32	175.87	178.64	179.11	182.99	183.74	177.59	179.57	178.57	180.97	183.32	184.99	185.87	188.28	190.86	183.66	184.5	189.12	180.27	0	0	0	0	0	0	0	0	0	0	0	0	0	0	0	0	0	0	0
178	2013	12	0	25700	2013-09-14	HST	177.44	176.24	171.96	169.48	171.57	171.28	176.44	178.94	178.9	180.15	178.63	173.81	175.4	174.84	176.99	179.31	179.54	181.22	182.26	185.04	183.88	184.26	187.51	183.01	0	0	0	0	0	0	0	0	0	0	0	0	0	0	0	0	0	0	0
178	2013	12	0	25800	2013-09-15	HST	179.24	177.24	174.58	171.98	171.62	173.25	176.17	178.18	179.34	179.28	178.86	173.02	173.94	174.72	176.64	178.11	179.61	183.22	184.21	190.77	186.12	182.51	179.78	179.03	0	0	0	0	0	0	0	0	0	0	0	0	0	0	0	0	0	0	0
178	2013	12	0	25900	2013-09-16	HST	175.19	168.43	116.6	114.14	116.06	168.17	176.17	179.61	179.36	182.17	178.64	179.38	186.38	188.87	182.5	178.33	181.84	184.6	187.37	192.49	186.74	181.39	180.72	179.47	0	0	0	0	0	0	0	0	0	0	0	0	0	0	0	0	0	0	0
178	2013	12	0	26000	2013-09-17	HST	174.9	168.86	168.16	115.3	117.14	168.32	176.04	178.69	177.53	178.82	178.11	179.65	177	178.68	179.7	181.71	180.13	181.98	182.81	186.92	183.55	183.43	178.87	178.18	0	0	0	0	0	0	0	0	0	0	0	0	0	0	0	0	0	0	0
178	2013	12	0	26100	2013-09-18	HST	170.38	30.38	29.75	29.73	29.67	168.13	175.35	178.15	177.31	176.91	177.95	178.04	176.28	182.48	180.48	183.61	186.79	184.56	186.42	192.27	187.42	184.41	180.71	181.94	0	0	0	0	0	0	0	0	0	0	0	0	0	0	0	0	0	0	0
178	2013	12	0	26200	2013-09-19	HST	175.34	168.16	115	113.6	113.75	168.16	174.82	176.09	176.28	179.42	177.98	176.15	174.37	177.67	180.55	179.68	180.47	180.43	183.81	189.32	185.79	184.67	180.03	176.65	0	0	0	0	0	0	0	0	0	0	0	0	0	0	0	0	0	0	0
178	2013	12	0	26300	2013-09-20	HST	171.99	168.13	116.58	114.27	116.05	168.21	174.52	177.1	176.91	176.98	173.85	176.41	180.09	178.9	176.7	176.47	175.56	178.41	181.92	183.87	180.82	177.5	184.21	179.44	0	0	0	0	0	0	0	0	0	0	0	0	0	0	0	0	0	0	0
178	2013	12	0	26400	2013-09-21	HST	177.47	176.35	173.1	171.59	170.11	169.8	176.97	179.72	176.9	178.01	176.4	178.42	175.99	175.17	175.9	176.39	176.46	177.43	180.51	182.8	179.8	177.88	183.1	179.38	0	0	0	0	0	0	0	0	0	0	0	0	0	0	0	0	0	0	0
178	2013	12	0	26500	2013-09-22	HST	178.26	173.66	169.68	168.62	169	139.74	174.66	177.16	178.57	180.63	175.28	170.92	169.6	170.24	172.49	174.58	176.29	179.57	182.04	183.93	181.6	181.46	183.61	180.15	0	0	0	0	0	0	0	0	0	0	0	0	0	0	0	0	0	0	0
178	2013	12	0	26600	2013-09-23	HST	172.29	118.13	113.29	30.65	112.88	168.16	174.99	177.06	176.51	179.68	184	182.94	184.57	184.06	185.12	184.54	187.02	186.3	185.05	188.24	183.46	184.63	182.29	179.67	0	0	0	0	0	0	0	0	0	0	0	0	0	0	0	0	0	0	0
178	2013	12	0	26700	2013-09-24	HST	172.02	168.17	116.84	113.79	115.48	168.27	176.26	181.19	180.07	181.92	187.11	189.27	191.92	193	186.4	186.24	184.03	181.84	184.71	191.74	185.6	183.03	179.85	178.47	0	0	0	0	0	0	0	0	0	0	0	0	0	0	0	0	0	0	0
178	2013	12	0	26800	2013-09-25	HST	171.74	168.14	114.69	112.27	113.57	168.17	173.55	179.75	178.85	177.67	178.39	178.31	179.65	180.73	179.02	176.95	177.27	177.27	177.27	177.27	177.27	177.27	177.27	177.27	0	0	0	0	0	0	0	0	0	0	0	0	0	0	0	0	0	0	0
178	2013	12	0	26900	2013-09-26	HST	177.27	177.27	177.27	177.27	177.27	177.27	177.27	178.02	174.73	179.89	176.47	177.62	179.63	181.15	180.19	181.7	184.02	184.39	186.68	185.62	184.33	181.46	178.78	173.88	0	0	0	0	0	0	0	0	0	0	0	0	0	0	0	0	0	0	0
178	2013	12	0	27000	2013-09-27	HST	169.09	116.3	112.47	113.29	114.13	168.21	174.55	179.07	177.62	180.44	178.65	181.29	183.85	179.41	176.88	178.29	181.74	179.96	183.12	187.52	181.83	182.17	183.33	179.61	0	0	0	0	0	0	0	0	0	0	0	0	0	0	0	0	0	0	0
178	2013	12	0	27100	2013-09-28	HST	177.69	174.74	172.58	171.3	173.57	173.08	176.98	177.41	180.02	180.37	176.69	176.28	175.84	174.16	176.78	177.89	177.04	179.32	179.87	183.17	182.32	179.01	180.2	178.95	0	0	0	0	0	0	0	0	0	0	0	0	0	0	0	0	0	0	0
178	2013	12	0	27200	2013-09-29	HST	176.1	173.58	170.47	169.17	170.29	172.77	174.92	177.12	177.58	179.3	178.76	177.39	176.32	173.99	174.05	176.4	179.75	183	184.29	185.37	182.67	181.92	182.36	178.1	0	0	0	0	0	0	0	0	0	0	0	0	0	0	0	0	0	0	0
178	2013	12	0	27300	2013-09-30	HST	172.25	168.46	117.62	116.43	117.25	169.72	176.73	179.13	179.26	181.56	179.39	177.23	176.74	180.16	179.41	181.68	189.09	193.51	191.25	189.38	185.24	183.54	180.69	178.08	0	0	0	0	0	0	0	0	0	0	0	0	0	0	0	0	0	0	0
178	2013	12	0	27400	2013-10-01	HST	172.26	164.01	112.95	110.73	112.02	164.13	173.91	179.68	176.73	176.37	197.12	192.3	191.69	193.42	192.27	194.12	193	193.33	195.41	197.22	194.43	192.1	189.21	183.85	0	0	0	0	0	0	0	0	0	0	0	0	0	0	0	0	0	0	0
178	2013	12	0	27500	2013-10-02	HST	119.02	111.5	30.16	29.97	29.99	176.74	182.21	190.91	189.81	186.91	186.94	189.75	190.8	191.9	197.52	195.05	191.13	191.5	195.96	194.79	196.1	193.64	191.3	187.09	0	0	0	0	0	0	0	0	0	0	0	0	0	0	0	0	0	0	0
178	2013	12	0	27600	2013-10-03	HST	117.3	30.58	30.12	29.83	30.02	111.76	179.55	190.51	191.59	191.78	190.65	192.95	192.88	191.75	190.7	195.31	192.6	195.31	196.36	194.78	193.49	193.81	190.42	182.2	0	0	0	0	0	0	0	0	0	0	0	0	0	0	0	0	0	0	0
178	2013	12	0	27700	2013-10-04	HST	119.39	30.61	29.89	29.48	29.73	30.51	114.06	184.09	182.59	119.17	117.5	183.64	187.44	185.89	30.56	185.12	191.84	192.86	191.25	194.61	193.73	191.59	191.79	191.16	0	0	0	0	0	0	0	0	0	0	0	0	0	0	0	0	0	0	0
178	2013	12	0	27800	2013-10-05	HST	187.4	126.31	30.25	30.08	29.73	29.65	119.88	181.38	187.15	185.63	191.23	30.4	113.2	30.19	116.89	114.52	169.71	185.5	189.47	194.71	191.99	188.03	192.87	190.98	0	0	0	0	0	0	0	0	0	0	0	0	0	0	0	0	0	0	0
178	2013	12	0	27900	2013-10-06	HST	186.99	118.22	29.91	29.61	29.62	29.9	29.67	30.15	183.92	187.03	187.42	117.33	116.4	116.73	119.1	119.06	184.34	185.55	193.15	195.54	188.79	188.77	189.28	186.18	0	0	0	0	0	0	0	0	0	0	0	0	0	0	0	0	0	0	0
178	2013	12	0	28000	2013-10-07	HST	119.66	110.81	30.22	29.97	30.18	111.12	115.19	169.75	185.04	191.5	191.01	188.59	193.42	194.69	192.78	193.81	194.45	193.99	195.28	199.81	194.35	193.31	190.73	185.17	0	0	0	0	0	0	0	0	0	0	0	0	0	0	0	0	0	0	0
178	2013	12	0	28100	2013-10-08	HST	115.06	30.01	29.25	28.76	29.03	29.81	30.58	112.62	119.42	140.8	187.07	189.63	188.26	189.29	189.52	190.68	191.17	192.41	193.08	194.5	193.76	192.55	190.13	187.21	0	0	0	0	0	0	0	0	0	0	0	0	0	0	0	0	0	0	0
178	2013	12	0	28200	2013-10-09	HST	113.62	30.29	29.76	29.75	29.23	30.07	169.75	184.23	169.76	169.67	169.85	169.88	184.45	189.81	191.16	190.16	191.47	195.3	193.7	195.58	192.68	192.27	190.15	169.88	0	0	0	0	0	0	0	0	0	0	0	0	0	0	0	0	0	0	0
178	2013	12	0	28300	2013-10-10	HST	30.09	29.13	29.01	28.63	29.49	112.3	181	187.21	188.63	30.48	190.8	191.52	192.4	30.45	116.53	118.38	192.97	197.62	196.64	197.02	196.17	192.97	188.47	118.5	0	0	0	0	0	0	0	0	0	0	0	0	0	0	0	0	0	0	0
178	2013	12	0	28400	2013-10-11	HST	114.36	30.07	29.6	29.23	29.49	30.33	116.68	182.97	192.85	188.2	190.06	191.68	194.03	195.36	195.12	196.44	199.83	208.23	202.84	204.71	197.7	195.95	199.25	195.87	0	0	0	0	0	0	0	0	0	0	0	0	0	0	0	0	0	0	0
178	2013	12	0	28500	2013-10-12	HST	191.68	188.54	133.44	30.37	30.25	30.5	184.61	192.22	193.42	195.8	188.69	30.59	116.69	169.61	187.5	189	191.14	195.07	194.37	193.26	191.9	192.07	195.41	191.47	0	0	0	0	0	0	0	0	0	0	0	0	0	0	0	0	0	0	0
178	2013	12	0	28600	2013-10-13	HST	193.9	188	136.3	30.45	30.29	30.55	182.48	186.73	188.97	179.68	185.19	118.27	169.92	189.04	191.75	184.89	186.54	188.58	193.42	196.95	196.02	193.99	190.62	180.07	0	0	0	0	0	0	0	0	0	0	0	0	0	0	0	0	0	0	0
178	2013	12	0	28700	2013-10-14	HST	169.64	111.18	30.2	29.79	29.88	30.11	119.45	184.21	185.76	192.34	196.99	194.78	196.89	198.05	195.48	189.91	193.68	196.41	200.43	208.16	197.88	192.4	197.24	192.29	0	0	0	0	0	0	0	0	0	0	0	0	0	0	0	0	0	0	0
178	2013	12	0	28800	2013-10-15	HST	117.74	30.64	29.98	29.82	29.88	30.34	181.05	187.7	188.65	184.19	193.29	179.82	179.89	184.3	190.83	192.77	194.58	195.56	197.19	193.53	194.24	193.78	192.86	189.28	0	0	0	0	0	0	0	0	0	0	0	0	0	0	0	0	0	0	0
178	2013	12	0	28900	2013-10-16	HST	117.55	113.25	30.45	30.1	30.23	114.12	186.58	190.55	189.9	188.12	190.81	188.25	187.26	191.05	191.36	191.75	190.45	195.71	197.47	194.94	197.36	193.71	193.82	190.52	0	0	0	0	0	0	0	0	0	0	0	0	0	0	0	0	0	0	0
178	2013	12	0	29000	2013-10-17	HST	188.13	169.84	118.14	115.55	116.83	169.65	189.39	192.87	192.56	193.51	194.36	194.15	193.55	197.27	195.04	196.22	199.51	199.75	205.2	207.91	199.45	198.52	194.62	191.1	0	0	0	0	0	0	0	0	0	0	0	0	0	0	0	0	0	0	0
178	2013	12	0	29100	2013-10-18	HST	187.48	117.91	110.91	30.28	30.3	109.92	117.32	188.9	188.24	191.01	190.42	190.72	191.2	189.41	189.98	191.67	193.24	194.04	195.64	192.61	192.6	194.07	193.49	191.89	0	0	0	0	0	0	0	0	0	0	0	0	0	0	0	0	0	0	0
178	2013	12	0	29200	2013-10-19	HST	189.27	186.61	140.89	30.44	30.44	127.76	187.54	188.93	190.05	188.87	118.66	169.7	186.38	190.37	191.11	190.15	192.02	192.13	193.67	196.42	194.68	192.66	194.57	192.97	0	0	0	0	0	0	0	0	0	0	0	0	0	0	0	0	0	0	0
178	2013	12	0	29300	2013-10-20	HST	189.6	186.46	179.14	113.66	30.47	182.7	185.02	186.87	190.81	192.45	191.44	187.3	190.96	190.52	191.85	191.49	192.37	193.13	195.39	197.82	196.87	193.23	191.05	187.38	0	0	0	0	0	0	0	0	0	0	0	0	0	0	0	0	0	0	0
178	2013	12	0	29400	2013-10-21	HST	117.39	30.52	29.94	29.64	29.83	110.91	183.78	190.24	191.13	191.62	191.84	189.96	191.24	193.81	194.95	194.05	192.86	192.1	193.18	194.42	194.58	194.01	191.53	185.9	0	0	0	0	0	0	0	0	0	0	0	0	0	0	0	0	0	0	0
178	2013	12	0	29500	2013-10-22	HST	115.38	30.31	29.83	29.64	29.82	110.81	169.65	190.44	194.67	192.39	191.61	191.84	196.52	200.07	203.7	201.92	200.06	204.18	207.19	208.42	205.45	199.34	197.27	197.73	0	0	0	0	0	0	0	0	0	0	0	0	0	0	0	0	0	0	0
178	2013	12	0	29600	2013-10-23	HST	193.73	191.56	189.87	188.81	188.85	189.32	193.61	197	195.74	201.86	198.36	197.1	194.31	204.62	210.51	200.64	202.85	199.58	204.74	211.01	200.98	199.5	198.39	196.78	0	0	0	0	0	0	0	0	0	0	0	0	0	0	0	0	0	0	0
178	2013	12	0	29700	2013-10-24	HST	194.4	189.11	117.44	114.66	113.26	113.05	189.48	192.17	192.09	210.34	193.44	188.68	183.18	184.13	169.84	192.85	196.11	198.64	205.21	208.14	205.22	199.79	196.52	187.93	0	0	0	0	0	0	0	0	0	0	0	0	0	0	0	0	0	0	0
178	2013	12	0	29800	2013-10-25	HST	113.58	29.39	29.42	29.85	30.02	112.89	188.24	193.72	191.82	190.48	190.71	190.5	190.42	191.19	188.89	193.67	196.1	195.85	197	198.36	194	194.3	196.78	193.95	0	0	0	0	0	0	0	0	0	0	0	0	0	0	0	0	0	0	0
178	2013	12	0	29900	2013-10-26	HST	191.64	186.41	128.83	30.34	30.21	30.58	187.12	191.9	194.98	195.36	191.75	189.88	194.15	192.38	192.49	195.91	197.9	199.15	197.76	198.89	198.61	195.1	197.29	196.03	0	0	0	0	0	0	0	0	0	0	0	0	0	0	0	0	0	0	0
178	2013	12	0	30000	2013-10-27	HST	193.8	190.71	184.93	141.04	132.08	180.34	188.87	190.37	194.52	194.82	195.5	193.34	193.46	192.53	193.03	193.33	198.45	195.54	198.71	201.15	197.75	193.63	192.89	190.68	0	0	0	0	0	0	0	0	0	0	0	0	0	0	0	0	0	0	0
178	2013	12	0	30100	2013-10-28	HST	169.78	113.44	30.59	30.25	30.47	117.78	191.18	194.81	194.61	193.17	190.34	191.32	189.27	192.55	196.73	194.13	195.87	197.4	195.4	198.01	198.9	195.9	190.97	188.83	0	0	0	0	0	0	0	0	0	0	0	0	0	0	0	0	0	0	0
178	2013	12	0	30200	2013-10-29	HST	169.67	111.79	30.28	30.02	30.19	113.42	190.73	196.99	195.68	193.21	30.6	186.22	186.51	189.22	189.79	197.28	195.07	197.07	198.85	201.47	193.64	192.56	191.02	190.09	0	0	0	0	0	0	0	0	0	0	0	0	0	0	0	0	0	0	0
178	2013	12	0	30300	2013-10-30	HST	117.59	30.53	29.91	29.75	30.02	111.34	182.14	190.37	180.63	188.29	186.32	188.64	187.16	189.56	190.22	191.08	193.28	197.58	194.51	197.04	194.8	194.19	195.52	194.2	0	0	0	0	0	0	0	0	0	0	0	0	0	0	0	0	0	0	0
178	2013	12	0	30400	2013-10-31	HST	169.72	112.42	30.42	29.95	30.32	115.36	190.58	193.66	30.57	175.94	188.34	189.92	190.32	188.59	192.15	193.3	188.67	193.93	196.84	193.68	193.14	192.46	191.49	186.94	0	0	0	0	0	0	0	0	0	0	0	0	0	0	0	0	0	0	0
178	2013	12	0	30500	2013-11-01	HST	116.96	30.41	29.94	29.93	30.15	113.2	186.77	189.81	188.56	30.11	30.15	30.08	118.03	195.36	195.3	191.86	197.59	199	199.1	197.74	198.77	197.52	199.9	196.5	0	0	0	0	0	0	0	0	0	0	0	0	0	0	0	0	0	0	0
178	2013	12	0	30600	2013-11-02	HST	193.56	30.5	30.34	30.06	29.66	29.94	30.32	129.24	29.88	30.52	30	189.02	189.2	194.17	194.33	195.8	197.7	197.57	195.59	201.35	199.36	199.97	198.08	196.45	0	0	0	0	0	0	0	0	0	0	0	0	0	0	0	0	0	0	0
178	2013	12	0	30700	2013-11-03	HST	192.69	140.91	30.27	29.85	29.63	29.83	30.59	29.85	29.65	30.13	30.16	30	30.11	30.04	172.68	172.73	194.88	199.51	200.73	199.27	199.17	197.33	197.83	172.52	0	0	0	0	0	0	0	0	0	0	0	0	0	0	0	0	0	0	0
178	2013	12	0	30800	2013-11-04	HST	30.52	30.39	30.13	29.95	30.05	115.41	189.87	195.65	196.17	196.36	194.14	194.09	195.86	194.04	191.24	191.06	196.92	200.01	199.67	200.93	200.32	198.57	197.22	196.46	0	0	0	0	0	0	0	0	0	0	0	0	0	0	0	0	0	0	0
178	2013	12	0	30900	2013-11-05	HST	195.37	192.02	187.41	185.53	187.08	193.86	198.96	199.24	197.1	198.01	196.58	199.8	199.63	198.69	198.75	201.4	205.54	213.59	207.56	216.75	215.54	208.55	203.9	201.5	0	0	0	0	0	0	0	0	0	0	0	0	0	0	0	0	0	0	0
178	2013	12	0	31000	2013-11-06	HST	197.57	192.94	172.72	172.53	172.64	194.24	198.12	202.62	200.21	200.94	206.05	214.89	218.42	225.98	220.97	216.03	205.27	208.93	216.3	215.42	217.02	206.8	202.93	199.6	0	0	0	0	0	0	0	0	0	0	0	0	0	0	0	0	0	0	0
178	2013	12	0	31100	2013-11-07	HST	195.57	187.55	172.41	117.04	112.43	114.01	191.19	197.78	197.89	197.91	197.62	198.55	199.29	199.24	197.98	199.68	199.53	200.08	208.87	201.04	200.47	200.5	197.13	196.17	0	0	0	0	0	0	0	0	0	0	0	0	0	0	0	0	0	0	0
178	2013	12	0	31200	2013-11-08	HST	172.34	117.52	112.45	30.44	30.47	116.9	192.33	197.94	198.67	197.11	198.04	196.66	195.24	197.26	198.9	199.37	197.7	199.77	201.64	201.25	198.56	201.45	200.35	197.71	0	0	0	0	0	0	0	0	0	0	0	0	0	0	0	0	0	0	0
178	2013	12	0	31300	2013-11-09	HST	195.45	193.16	188.97	184.53	184.09	189.71	194.6	196.79	197.24	196.41	193.74	189.4	192.63	191.13	190.85	196.57	196.34	196.47	200.44	200.96	198.93	203.13	199.38	197.5	0	0	0	0	0	0	0	0	0	0	0	0	0	0	0	0	0	0	0
178	2013	12	0	31400	2013-11-10	HST	189.29	139.45	30.25	30.28	29.64	30.17	128.36	190.16	195.67	194.62	119.35	117.96	116.78	112.79	183.12	115.51	192.7	197.8	197.23	197.78	196.51	195.45	172.17	188.84	0	0	0	0	0	0	0	0	0	0	0	0	0	0	0	0	0	0	0
178	2013	12	0	31500	2013-11-11	HST	127.94	30.02	29.38	29.27	29.52	29.92	30.21	116.68	172.11	188.74	189.31	186.92	189.44	191.1	191.45	192.15	196.45	198.44	201.76	203.98	201.82	197.11	191.43	119.92	0	0	0	0	0	0	0	0	0	0	0	0	0	0	0	0	0	0	0
178	2013	12	0	31600	2013-11-12	HST	30.52	29.68	29.11	28.9	29.23	29.96	119.17	191.7	187.84	189.33	122.46	30.49	172.19	187.82	188.02	190.88	194.59	197.4	203.11	200.81	198.37	196.62	191.5	172.11	0	0	0	0	0	0	0	0	0	0	0	0	0	0	0	0	0	0	0
178	2013	12	0	31700	2013-11-13	HST	193.85	142.43	30.53	30.27	30.5	30.31	172.16	194.99	189.61	119.62	188.27	183.45	172.13	194.66	196.94	199.33	199.13	202.12	199.16	199.75	199.67	201.42	197.28	187.03	0	0	0	0	0	0	0	0	0	0	0	0	0	0	0	0	0	0	0
178	2013	12	0	31800	2013-11-14	HST	189.06	188.97	135.36	30.6	30.64	188.66	172.17	199.29	194.63	202.8	203.64	172.27	194.9	197.72	197.32	194.97	197.74	197.4	204.89	200.46	206.24	203.92	197.13	195.23	0	0	0	0	0	0	0	0	0	0	0	0	0	0	0	0	0	0	0
178	2013	12	0	31900	2013-11-15	HST	204.63	195.03	191.07	187.19	187.5	193.69	192.7	203.61	195.33	197.91	195.4	203.91	204.51	196.34	200.62	202.31	204.07	203.29	207.75	201.98	204.2	201.71	206.04	200.98	0	0	0	0	0	0	0	0	0	0	0	0	0	0	0	0	0	0	0
178	2013	12	0	32000	2013-11-16	HST	198.4	193.6	189.53	143.53	142.38	188.08	193.35	196.96	198.89	199.41	202.74	198.08	193.56	192.78	197.95	194.63	197.3	198.45	201.04	201.14	202.14	199.51	199.93	199.59	0	0	0	0	0	0	0	0	0	0	0	0	0	0	0	0	0	0	0
178	2013	12	0	32100	2013-11-17	HST	197.56	193.41	188.99	144.77	133.75	186.03	191.28	191.89	196.91	200.21	199.02	191.78	196.34	195.43	197.72	201.08	202.25	206.64	213.24	213.02	205.41	204.69	199.67	199.17	0	0	0	0	0	0	0	0	0	0	0	0	0	0	0	0	0	0	0
178	2013	12	0	32200	2013-11-18	HST	201.7	196.78	190.14	186.63	194.8	30.52	193.04	203.89	202.32	195.05	196.21	191.4	30.64	192.61	172.28	195.21	206.59	203.84	214.87	213.23	208.97	202.22	200.34	195.48	0	0	0	0	0	0	0	0	0	0	0	0	0	0	0	0	0	0	0
178	2013	12	0	32300	2013-11-19	HST	198.94	193.72	183.02	84.35	130.41	114.13	187.18	197.3	195.18	190.92	193.03	189.31	189.16	187.65	187.93	202.56	202.46	205.21	215.01	216.19	209.95	204.85	202.83	194.77	0	0	0	0	0	0	0	0	0	0	0	0	0	0	0	0	0	0	0
178	2013	12	0	32400	2013-11-20	HST	194.43	195.17	192.05	189.06	190.73	196.22	192.49	200.25	190.78	172.04	199.24	222.09	199.36	202.38	213.28	206.91	206.71	207.26	215.31	206.2	202.21	199.53	201.78	195.02	0	0	0	0	0	0	0	0	0	0	0	0	0	0	0	0	0	0	0
178	2013	12	0	32500	2013-11-21	HST	189.89	193.39	191.33	147.13	189.66	195.36	193.02	201.21	198.24	200.9	207.01	195.72	30.23	200.46	200.27	204.61	213.69	213.42	221.86	215.92	205.07	201.51	196.9	192.86	0	0	0	0	0	0	0	0	0	0	0	0	0	0	0	0	0	0	0
178	2013	12	0	32600	2013-11-22	HST	192.83	191.25	30.46	30	30.11	192.92	118.73	199.15	197.79	197.33	194.3	199.62	202.69	203.54	202.91	210.16	202.38	30.5	201.89	207.03	201.03	204.32	201.51	198.82	0	0	0	0	0	0	0	0	0	0	0	0	0	0	0	0	0	0	0
178	2013	12	0	32700	2013-11-23	HST	194.62	115.87	29.95	29.56	29.51	29.9	190.97	197.34	193.65	194.83	195.06	194.98	114.34	116.69	117.29	120.21	190.39	195.53	198.35	196.61	198.92	203.44	202.07	197.47	0	0	0	0	0	0	0	0	0	0	0	0	0	0	0	0	0	0	0
178	2013	12	0	32800	2013-11-24	HST	191.11	30.45	29.71	29.31	29.1	29.42	30.07	128.49	190.01	116.7	113.48	30.56	30.52	30.45	120.74	172.05	191.72	196.4	203.78	205.92	205.62	201.21	200.88	197.65	0	0	0	0	0	0	0	0	0	0	0	0	0	0	0	0	0	0	0
178	2013	12	0	32900	2013-11-25	HST	190.95	122.12	30.14	29.97	30.29	189.72	196.49	207.64	201.77	203.87	201.29	197.97	197.26	198.83	199.27	200.94	205.72	210.75	213.77	217.28	207.19	207.58	205.32	197.77	0	0	0	0	0	0	0	0	0	0	0	0	0	0	0	0	0	0	0
178	2013	12	0	33000	2013-11-26	HST	193.12	127.23	30.22	29.99	30.28	119.57	172.16	196.26	190.72	193.93	194.56	193.96	194.8	195.11	196.71	198.48	201.68	202.94	211.79	203.39	205.11	201.87	197.02	188.75	0	0	0	0	0	0	0	0	0	0	0	0	0	0	0	0	0	0	0
178	2013	12	0	33100	2013-11-27	HST	190.51	188.91	123.05	30.34	30.33	190.53	172.13	196.66	195.34	196.2	197.37	195.28	192.75	195.1	196.94	197.28	202.28	205.16	214.52	210.65	203.75	201.25	197.89	196.02	0	0	0	0	0	0	0	0	0	0	0	0	0	0	0	0	0	0	0
178	2013	12	0	33200	2013-11-28	HST	198.34	193.09	139.84	30.59	30.4	143.51	119.23	120.81	190.41	196.52	196.78	197.26	198.08	196.59	196.35	197.27	199.05	200.86	202.38	201.39	198.81	197.45	194.48	172.35	0	0	0	0	0	0	0	0	0	0	0	0	0	0	0	0	0	0	0
178	2013	12	0	33300	2013-11-29	HST	194.76	189.21	30.4	30.3	30.37	188.79	117.16	189.06	192.75	194.84	197.45	197.03	196.55	199.28	197.55	196.25	201.83	203.01	207	205.15	201.49	204.81	206.42	201.5	0	0	0	0	0	0	0	0	0	0	0	0	0	0	0	0	0	0	0
178	2013	12	0	33400	2013-11-30	HST	194	191.84	133.27	29.98	29.64	29.97	169.9	194.87	198.5	203.99	192.27	194.85	195.97	194.09	194.85	194.7	196.46	201.29	203.16	203.93	201.17	200.51	204.03	201.96	0	0	0	0	0	0	0	0	0	0	0	0	0	0	0	0	0	0	0
178	2013	12	0	33500	2013-12-01	HST	195.33	185.42	124.89	30.41	30.45	30.52	145.86	193.88	199.35	200.54	200.48	199.78	198.39	198.54	197.69	199.56	200.68	203.17	202.25	202.18	201.78	196.44	189.79	116.2	0	0	0	0	0	0	0	0	0	0	0	0	0	0	0	0	0	0	0
178	2013	12	0	33600	2013-12-02	HST	187.11	128.28	30.45	30.27	30.56	189.05	189.21	198.55	198.74	195.33	195.14	194.74	196.01	196.18	197.23	199.66	202.26	206.27	206.81	205.79	205.44	200.82	199.47	194.33	0	0	0	0	0	0	0	0	0	0	0	0	0	0	0	0	0	0	0
178	2013	12	0	33700	2013-12-03	HST	196.39	190.71	144.62	122.27	136.05	189.83	190.51	198.33	196.13	194.89	194.53	194.56	195.44	195.28	196.92	200.59	201.87	203.28	208.49	207.49	204.81	201.52	197.45	191.79	0	0	0	0	0	0	0	0	0	0	0	0	0	0	0	0	0	0	0
178	2013	12	0	33800	2013-12-04	HST	194.94	190.66	141.55	127.13	133.88	189.79	189.97	199.01	196.6	194.73	194.47	194	190.38	196.69	196.22	196.66	199.74	201.54	206.28	208.37	202.89	200.29	198.21	193.16	0	0	0	0	0	0	0	0	0	0	0	0	0	0	0	0	0	0	0
178	2013	12	0	33900	2013-12-05	HST	195.63	189.79	128.98	30.54	30.55	184.1	184.96	197.23	195.22	196.17	196.04	191.91	194.29	188.32	196.49	198.74	197.86	203.87	205.68	207.01	204.03	201.62	196.64	190.22	0	0	0	0	0	0	0	0	0	0	0	0	0	0	0	0	0	0	0
178	2013	12	0	34000	2013-12-06	HST	194.66	187.05	30.44	30.26	30.39	186.29	171.09	195.16	171.2	188.1	30.32	30.2	187.89	195.04	194.04	198.16	199.93	202.4	204.15	206.68	202.78	205.71	200.62	196.46	0	0	0	0	0	0	0	0	0	0	0	0	0	0	0	0	0	0	0
178	2013	12	0	34100	2013-12-07	HST	187.42	185.57	126.94	30.35	30.28	30.58	192.9	193.72	196.91	187.27	190.34	190.51	190.05	190.21	192.23	195.21	198.6	202.02	200.19	202.19	198.64	199.76	197.01	199	0	0	0	0	0	0	0	0	0	0	0	0	0	0	0	0	0	0	0
178	2013	12	0	34200	2013-12-08	HST	191.4	191.2	126.33	30.45	30.29	30.56	189.75	192.53	196.19	197.31	197.48	193.38	186.77	190.59	197	198.73	209.77	210.66	222.67	217.35	214.15	205.34	212.75	204.68	0	0	0	0	0	0	0	0	0	0	0	0	0	0	0	0	0	0	0
178	2013	12	0	34300	2013-12-09	HST	199.53	171.18	119.5	115.62	116.32	171.11	200.94	203.44	197.55	199.76	190.73	30.42	199.65	201.88	203.5	210.43	211.81	205.13	214.73	221.84	218.73	209.17	202.74	198.34	0	0	0	0	0	0	0	0	0	0	0	0	0	0	0	0	0	0	0
178	2013	12	0	34400	2013-12-10	HST	191.48	171.14	116.28	114.46	115.71	171.2	197.27	203.81	200.05	200.81	199.93	195.34	195.04	196.21	195.35	195.92	197.89	212.12	213.32	214.54	213.23	201.91	201.38	199.38	0	0	0	0	0	0	0	0	0	0	0	0	0	0	0	0	0	0	0
178	2013	12	0	34500	2013-12-11	HST	120.54	112.96	30.21	29.73	30.11	116.44	187.28	198.69	192.93	191.22	191.01	187.68	192.88	198.22	196.93	198.54	188.84	200.84	214.14	216.52	204.16	204.76	197.59	192.17	0	0	0	0	0	0	0	0	0	0	0	0	0	0	0	0	0	0	0
178	2013	12	0	34600	2013-12-12	HST	116.35	30.16	29.66	29.71	29.87	112.69	188.04	198.98	191.84	189.63	171.16	119.75	178.76	195.45	195.82	199.76	204.56	201.55	214.3	213.52	210.11	201.14	200.57	171.35	0	0	0	0	0	0	0	0	0	0	0	0	0	0	0	0	0	0	0
178	2013	12	0	34700	2013-12-13	HST	30.57	29.48	29.4	29.04	29.73	112.57	186.27	194.12	191.24	194.09	190.85	29.87	199.22	196.08	195.27	30.49	192.39	198.97	202.65	205.22	203.91	200.63	196.54	197.55	0	0	0	0	0	0	0	0	0	0	0	0	0	0	0	0	0	0	0
178	2013	12	0	34800	2013-12-14	HST	191.45	137.62	30.04	29.53	29.59	30.06	189.86	192.89	195.23	197.42	195.53	195.11	194.67	196.67	197.84	199.61	201.99	200.42	204.04	204.28	205	201.82	200.01	197.2	0	0	0	0	0	0	0	0	0	0	0	0	0	0	0	0	0	0	0
178	2013	12	0	34900	2013-12-15	HST	191.75	133.46	30.08	30.18	30.09	30.33	170.59	192.76	198.16	201.77	211.69	207.58	206.55	198.33	197.55	194.76	193.85	201.52	212.26	213.73	210.68	203.08	201.07	194.94	0	0	0	0	0	0	0	0	0	0	0	0	0	0	0	0	0	0	0
178	2013	12	0	35000	2013-12-16	HST	125.05	29.85	29.22	28.97	29.34	125.52	193.82	195.94	190.02	198.66	198.77	193.35	161.46	191.81	191.9	195.36	204.01	211.03	214.15	205.77	201.11	206.58	201.26	195.85	0	0	0	0	0	0	0	0	0	0	0	0	0	0	0	0	0	0	0
178	2013	12	0	35100	2013-12-17	HST	141.79	30.02	29.32	29.52	29.54	30.45	194.7	202.11	200.36	171.19	171.3	116.99	118.03	119.01	171.01	189.59	194.1	196.18	200.25	202.96	202.54	200.43	193.17	119.11	0	0	0	0	0	0	0	0	0	0	0	0	0	0	0	0	0	0	0
178	2013	12	0	35200	2013-12-18	HST	141.12	29.85	29.7	29.33	29.41	30.06	113.07	190.92	171.11	171.15	171.28	30.49	30.65	30.56	171.23	171.06	192.56	197.84	202.9	203.21	202.12	196.33	192.05	117.57	0	0	0	0	0	0	0	0	0	0	0	0	0	0	0	0	0	0	0
178	2013	12	0	35300	2013-12-19	HST	144.06	30.17	29.84	29.39	29.41	30.21	115.75	171.17	119.79	191.41	187.95	185.64	171.21	171.31	189.27	191.9	195.68	197.38	202.02	205.18	200.95	200.19	195.94	171.25	0	0	0	0	0	0	0	0	0	0	0	0	0	0	0	0	0	0	0
178	2013	12	0	35400	2013-12-20	HST	118.08	113.02	111.92	30.42	30.65	116.39	193.45	196.64	197.16	196.45	198.34	189.33	30.51	171.07	195.34	199.15	201.31	200.27	203.12	201.56	201.89	201.05	205.23	200.38	0	0	0	0	0	0	0	0	0	0	0	0	0	0	0	0	0	0	0
178	2013	12	0	35500	2013-12-21	HST	197.77	193	191.22	188.01	189.68	191.09	195.42	200.32	201.02	204.33	203.47	196.98	195.25	195.75	195.69	198.48	199.73	202.89	202.13	203.33	204.9	207.11	202.62	200.81	0	0	0	0	0	0	0	0	0	0	0	0	0	0	0	0	0	0	0
178	2013	12	0	35600	2013-12-22	HST	199.69	196.83	193.57	191.41	190.27	191.7	195.44	198.09	201.34	195.23	195.47	193.97	194.47	197.24	197.33	196.53	198.6	205.03	205.03	206.84	203.41	200.14	199.86	196.75	0	0	0	0	0	0	0	0	0	0	0	0	0	0	0	0	0	0	0
178	2013	12	0	35700	2013-12-23	HST	190.37	119.66	113.4	30.42	30.42	118.2	190.95	197.31	194.88	198.58	200.14	197.17	192.71	193.56	195.1	200.05	198.82	201.9	207.16	205.3	202.63	200.77	208.09	203.13	0	0	0	0	0	0	0	0	0	0	0	0	0	0	0	0	0	0	0
178	2013	12	0	35800	2013-12-24	HST	195.69	171.06	113.7	30.22	30.32	113.14	171.16	196.31	200.38	203.12	198.72	196.86	196.71	197.17	196.96	200.37	200.76	203.91	211.58	203.53	193.81	194.96	191.4	189.34	0	0	0	0	0	0	0	0	0	0	0	0	0	0	0	0	0	0	0
178	2013	12	0	35900	2013-12-25	HST	118.08	30.38	29.63	29.25	29.16	29.05	29.73	111.78	119.79	171.14	171.22	171.2	171.18	171.07	171.19	195.88	200.13	202.36	207.08	204.46	205.11	201.36	201.17	190.38	0	0	0	0	0	0	0	0	0	0	0	0	0	0	0	0	0	0	0
178	2013	12	0	36000	2013-12-26	HST	113.95	29.88	29.37	29.3	29.4	30.05	119.53	198.33	198.81	199.96	200.93	204.45	204.11	202.18	199.89	205.86	205.01	203.14	212.96	212.79	205.47	202.3	217.22	171.13	0	0	0	0	0	0	0	0	0	0	0	0	0	0	0	0	0	0	0
178	2013	12	0	36100	2013-12-27	HST	111.62	29.82	29.25	29.07	29.26	29.81	116.99	182.88	190.37	171.27	171.21	171.07	150.96	120.04	120.33	190.23	196.72	197.47	204.13	204.98	199.28	198.35	201.47	199.58	0	0	0	0	0	0	0	0	0	0	0	0	0	0	0	0	0	0	0
178	2013	12	0	36200	2013-12-28	HST	195.26	190.3	119.89	114.59	30.58	139.25	192.99	195.91	195.94	197.13	194.01	192.71	117.33	114.98	117.28	171.13	195.41	200.87	205.55	203.89	200.95	200.36	200.54	200.54	0	0	0	0	0	0	0	0	0	0	0	0	0	0	0	0	0	0	0
178	2013	12	0	36300	2013-12-29	HST	195.77	196.01	192.81	30.6	30.41	135.71	192.71	195.87	198.19	197.31	198.17	196.11	114.19	113.29	117.61	171.14	195.71	202.25	199.43	200.38	195.76	201.91	198.28	194.15	0	0	0	0	0	0	0	0	0	0	0	0	0	0	0	0	0	0	0
178	2013	12	0	36400	2013-12-30	HST	113.29	30.01	29.48	29.3	29.53	30.49	119.89	195.21	193.24	171.16	192.8	116.73	116.99	192.07	191.3	171.03	191.16	195.73	199.43	200.68	200.99	200.13	196.32	171.01	0	0	0	0	0	0	0	0	0	0	0	0	0	0	0	0	0	0	0
178	2013	12	0	36500	2013-12-31	HST	111.74	30.32	29.72	29.37	29.57	30.26	119	195.6	195.24	197.34	197.58	198	198.68	198.44	197.89	200.81	203.05	204.09	205.27	201.92	197.12	194.34	192.68	204.29	0	0	0	0	0	0	0	0	0	0	0	0	0	0	0	0	0	0	0
[truncated: 8 more columns]
