# Supplementary material for: Multi-Objective Control of Air Conditioning Improves Cost, Comfort and System Energy Balance
Source: Preprints.org preprint supplement (doi:10.20944/preprints201808.0120.v3), 2018-09-10
Supplement: Supplementary file 4 [file HeatMapHistory.xlsx]

## Sheet: 2.9e-3
dd-mmm-yyyy	Tset1	Tset2	Tset3	Tset4	Tset5	Tset6	Tset7	Tset8	Tset9	Tset10	Tset11	Tset12	Tset13	Tset14	Pelec	Pdisc	Netcost	WattHours	DOY	Write_Hr	Write_Min
2012-07-25	35	35	35	35	35	35	35	35	23.889	23.889	23.889	23.889	23.889	35	0	0	0	0	213	17	15
2012-07-26	35	35	35	35	35	35	35	35	23.889	23.889	23.889	23.889	23.889	35	0	0	0	0	213	17	15
2012-07-27	35	35	35	35	35	35	35	35	23.889	23.889	23.889	23.889	23.889	35	0	0	0	0	213	17	15
2012-07-28	35	35	35	35	35	35	35	35	23.889	23.889	23.889	23.889	23.889	35	0	0	0	0	213	17	15
2012-07-29	35	35	35	35	35	35	35	35	23.889	23.889	23.889	23.889	23.889	35	0	0	0	0	213	17	15
2012-07-30	35	35	35	35	35	35	35	35	23.889	23.889	23.889	23.889	23.889	35	0	0	0	0	213	17	15
2012-07-31	35	35	35	35	35	35	35	35	23.889	23.889	23.889	23.889	23.889	35	0	0	0	0	213	17	15
2012-08-01	23.088	19.645	16.759	18.806	19.002	21.455	21.757	22.764	21.075	22.404	23.053	22.638	23.561	31.165	452.334	13.9337	466.267	6.43254e+06	213	18	36
2012-08-02	25.768	17.482	27.947	19.954	18.433	30.862	29.514	22.823	23.141	24.045	23.466	23.178	23.824	30.3	453.001	27.2848	480.286	5.09045e+06	214	19	57
2012-08-03	28.97	29.503	31.326	16.4	17.718	31.145	16.116	30.766	23.146	23.468	23.505	23.327	24.036	31.233	608.201	37.3193	645.52	6.39725e+06	215	21	18
2012-08-04	31.758	28.768	29.48	18.919	20.082	30.272	31.966	31.695	23.96	23.726	23.951	24.911	24.255	31.675	425.625	12.0071	437.632	5.16097e+06	216	22	34
2012-08-05	29.309	31.446	31.577	22.726	25.645	29.612	31.105	30.649	24.242	23.809	23.834	23.493	23.071	30.883	230.751	4.8466	235.597	3.51775e+06	217	23	56
2012-08-06	30.277	30.847	31.068	19.7	20.16	30.738	29.937	30.801	23.743	23.872	23.947	24.029	23.362	27.312	261.608	28.9506	290.558	3.15017e+06	218	1	14
2012-08-07	29.458	30.494	30.585	21.156	20.08	31.195	31.74	23.376	24.084	23.537	23.623	23.415	23.759	31.507	299.835	28.4159	328.251	2.56617e+06	219	2	33
2012-08-08	29.975	26.088	27.507	20.605	20.031	31.017	30.802	28.922	24	23.769	23.052	23.531	23.853	31.597	406.772	35.214	441.986	2.84039e+06	220	3	52
2012-08-09	29.089	29.873	26.881	19.973	20.064	16.097	26.922	29.408	23.464	23.61	23.295	23.509	23.99	27.606	447.486	36.7421	484.228	3.88553e+06	221	5	10
2012-08-10	22.147	29.693	31.475	18.934	17.43	20.141	31.997	31.75	23.055	22.801	23.224	22.897	23.737	30.991	355.114	23.817	378.931	4.40963e+06	222	6	27
2012-08-11	31.492	30.306	26.039	22.45	17.924	26.698	27.272	29.314	22.765	23.726	23.683	23.543	22.865	30.986	229.119	2.5596	231.679	3.3902e+06	223	7	41
2012-08-12	29.258	30.087	31.66	20.901	19.912	18.872	31.028	27.401	23.344	23.871	24.148	23.9	22.294	31.981	246.914	1.7978	248.712	3.55912e+06	224	8	56
2012-08-13	29.586	30.196	29.268	19.793	20.275	31.359	30.6	28.173	23.287	23.64	23.206	23.476	23.518	30.947	346.86	20.8033	367.663	3.80423e+06	225	10	16
2012-08-14	29.278	26.522	30.244	21.174	19.401	31.66	30.859	29.981	23.027	23.707	23.333	23.732	23.585	28.488	314.854	25.2483	340.103	4.23423e+06	226	11	38
2012-08-15	28.091	31.602	30.255	21.746	16.288	18.726	28.587	22.402	22.738	23.398	23.332	22.899	23.697	26.275	359.709	19.0976	378.807	4.74839e+06	227	12	58
2012-08-16	30.339	31.057	26.048	20.165	19.499	25.969	26.93	27.062	23.773	23.837	23.958	23.441	23.606	29.412	322.618	30.1117	352.73	3.36421e+06	228	14	18
2012-08-17	27.985	29.064	31.401	20.68	16.416	30.264	25.053	29.554	23.244	23.197	23.282	23.123	23.632	29.941	272.564	23.53	296.094	3.29265e+06	229	15	38
2012-08-18	31.734	26.077	28.589	20.274	21.43	27.125	30.893	29.344	23.545	23.847	23.666	23.543	23.391	30.681	161.981	4.9469	166.928	2.68014e+06	230	16	58
2012-08-19	31.849	30.707	31.047	21.414	19.678	19.74	27.387	31.012	21.795	23.817	23.956	22.501	21.768	31.158	161.675	2.7115	164.387	3.37412e+06	231	18	19
2012-08-20	29.807	31.004	31.74	18.354	18.261	30.18	31.514	29.661	23.111	23.61	23.374	23.457	23.297	29.985	278.308	16.1273	294.435	4.65674e+06	232	19	38
2012-08-21	25.499	29.862	29.473	19.663	17.702	31.36	28.103	29.882	23.686	23.128	23.691	22.992	23.271	30.062	285.024	17.8821	302.906	4.26984e+06	233	20	55
2012-08-22	25.821	20.656	29.71	20.727	29.358	25.413	30.131	30.006	23.412	24.017	23.713	23.368	23.215	31.607	338.213	21.2555	359.468	5.73304e+06	234	22	6
2012-08-23	31.046	29.354	31.486	28.412	30.933	31.026	27.388	30.769	23.822	23.598	23.447	23.895	23.778	29.296	281.315	36.8758	318.19	3.76243e+06	235	23	20
2012-08-24	29.29	31.138	29.099	19.084	20.263	24.484	29.098	27.283	23.511	23.42	23.521	23.36	23.817	30.197	326.644	31.9516	358.596	4.11838e+06	236	0	41
2012-08-25	30.173	31.822	28.942	29.928	24.363	30.042	19.548	28.865	23.956	23.899	23.518	23.786	22.976	26.351	246.471	3.7491	250.22	3.15145e+06	237	1	58
2012-08-26	30.89	31.542	31.462	20.067	21.112	29.845	24.58	25.258	23.979	22.91	23.949	23.592	23.552	29.157	215.093	4.7519	219.844	3.36898e+06	238	3	14
2012-08-27	31.914	30.372	28.692	20.505	19.48	31.644	30.752	31.724	23.672	23.425	23.319	23.941	23.848	30.068	314.085	33.8597	347.945	5.03998e+06	239	4	33
2012-08-28	31.575	29.767	27.815	19.277	18.207	30.762	30.784	23.808	22.894	23.478	23.299	23.235	23.633	27.033	359.72	19.0532	378.773	5.93171e+06	240	5	47
2012-08-29	22.605	29.716	30.087	25.751	19.688	21.641	24.513	23.363	23.867	21.346	23.597	23.218	23.608	28.606	354.845	20.8395	375.684	5.68949e+06	241	7	1
2012-08-30	29.609	22.893	31.85	18.251	17.02	22.262	31.193	28.1	23.123	23.026	23.116	23.481	23.702	30.678	259.729	24.164	283.893	3.82948e+06	242	8	13
2012-08-31	28.357	22.229	20.941	18.528	18.446	29.219	27.988	22.654	23.093	23.169	23.277	23.345	23.523	26.255	267.613	15.3613	282.974	5.10953e+06	243	9	33
		16.008															0.0029

## Sheet: 1.7e-3
dd-mmm-yyyy	Tset1	Tset2	Tset3	Tset4	Tset5	Tset6	Tset7	Tset8	Tset9	Tset10	Tset11	Tset12	Tset13	Tset14	Pelec	Pdisc	Netcost	WattHours	DOY	Write_Hr	Write_Min
2012-07-25	35	35	35	35	35	35	35	35	23.889	23.889	23.889	23.889	23.889	35	0	0	0	0	213	18	37
2012-07-26	35	35	35	35	35	35	35	35	23.889	23.889	23.889	23.889	23.889	35	0	0	0	0	213	18	37
2012-07-27	35	35	35	35	35	35	35	35	23.889	23.889	23.889	23.889	23.889	35	0	0	0	0	213	18	37
2012-07-28	35	35	35	35	35	35	35	35	23.889	23.889	23.889	23.889	23.889	35	0	0	0	0	213	18	37
2012-07-29	35	35	35	35	35	35	35	35	23.889	23.889	23.889	23.889	23.889	35	0	0	0	0	213	18	37
2012-07-30	35	35	35	35	35	35	35	35	23.889	23.889	23.889	23.889	23.889	35	0	0	0	0	213	18	37
2012-07-31	35	35	35	35	35	35	35	35	23.889	23.889	23.889	23.889	23.889	35	0	0	0	0	213	18	37
2012-08-01	29.574	16.008	21.735	17.754	18.405	30.241	29.644	29.172	23.925	23.462	23.451	24.039	24.162	27.083	397.07	28.2953	425.365	5.12833e+06	213	19	55
2012-08-02	30.724	31.785	20.78	20.311	19.169	20.24	31.816	31.795	23.928	23.859	23.365	22.765	24.12	31.921	453.008	25.8012	478.809	5.17987e+06	214	21	15
2012-08-03	31.358	30.245	30.596	22.118	16.266	30.263	31.228	30.69	24.199	23.998	24.047	23.539	24.854	31.505	565.148	50.5145	615.662	5.6057e+06	215	22	30
2012-08-04	28.885	30.146	17.996	19.341	19.937	29.443	31.107	29.884	23.384	25.08	23.871	24.278	25.43	29.968	417.442	14.9322	432.375	5.43403e+06	216	23	46
2012-08-05	29.493	31.209	30.995	23.499	22.772	29.735	31.29	31.355	23.994	23.804	22.996	23.972	23.296	31.531	238.346	2.7667	241.113	3.80984e+06	217	1	0
2012-08-06	26.731	30.775	27.072	20.626	17.417	26.905	30.981	29.571	23.819	23.772	23.942	23.656	23.649	28.608	255.994	19.7074	275.701	3.13759e+06	218	2	14
2012-08-07	29.196	30.925	30.685	20.014	17.476	29.972	30.215	30.055	23.998	23.537	24.629	23.122	23.9	27.916	300.159	25.3416	325.501	2.64959e+06	219	3	29
2012-08-08	29.85	30.905	31.933	17.543	17.045	30.87	29.495	30.067	23.78	23.795	23.713	23.543	24.238	31.343	394.753	29.5238	424.277	2.90181e+06	220	4	43
2012-08-09	30.978	30.043	31.495	19.72	18.185	28.817	30.781	30.185	23.401	23.588	23.815	23.653	24.397	31.817	431.815	32.976	464.791	3.63223e+06	221	5	58
2012-08-10	30.795	30.719	26.203	19.743	19.354	29.551	28.297	28.898	23.431	23.967	23.7	24.213	24.154	31.989	333.159	29.5533	362.713	3.95047e+06	222	7	12
2012-08-11	31.682	29.883	31.087	21.739	21.575	30.459	29.783	31.695	24.127	23.877	23.668	24.341	23.292	31.309	227.101	3.2038	230.305	3.31502e+06	223	8	26
2012-08-12	30.46	29.884	30.92	21.246	16.101	31.559	29.544	31.835	22.503	22.606	23.664	23.706	22.876	28.852	240.134	0.72374	240.858	3.32775e+06	224	9	42
2012-08-13	30.207	31.385	31.064	19.764	17.011	31.955	31.909	28.639	23.859	23.804	23.832	23.643	24.04	30.67	338.662	25.0961	363.758	3.81574e+06	225	10	54
2012-08-14	29.592	29.226	31.65	18.039	20.872	27.452	28.055	29.423	23.898	23.886	23.328	23.39	23.992	31.715	307.828	24.0156	331.843	4.14984e+06	226	12	8
2012-08-15	30.677	21.602	29.957	20.772	18.769	30.308	27.338	31.346	23.204	23.817	23.88	24.1	24.292	31.857	336.482	30.9451	367.427	4.32249e+06	227	13	27
2012-08-16	21.618	21.365	25.503	20.834	18.988	31.652	29.681	30.663	22.874	23.224	22.662	24.381	24.082	30.673	331.57	22.4856	354.055	3.77673e+06	228	14	46
2012-08-17	30.338	27.149	29.342	21.026	19.282	31.986	31.286	30.901	23.735	23.789	23.999	23.961	24.1	27.248	254.968	28.0503	283.018	3.06542e+06	229	16	3
2012-08-18	31.738	31.325	31.331	26.188	22.155	30.313	28.718	30.776	23.96	23.745	23.618	23.93	23.731	31.889	156.332	4.3728	160.704	2.47264e+06	230	17	19
2012-08-19	30.392	30.835	21.784	16.104	21.829	31.696	28.885	30.855	23.789	25.033	23.607	23.975	22.665	31.755	154.585	2.0504	156.635	3.14734e+06	231	18	36
2012-08-20	29.18	31.818	29.529	21.426	29.698	31.624	31.709	30.365	23.726	23.768	23.943	23.903	23.807	31.927	268.315	22.157	290.472	4.13125e+06	232	19	48
2012-08-21	31.054	29.717	31.238	20.52	20.105	31.815	31.267	31.311	23.859	23.808	23.825	23.511	23.73	31.398	279.472	20.6054	300.077	4.14953e+06	233	21	0
2012-08-22	30.53	28.752	31.135	17.463	20.004	29.357	30.721	31.475	23.741	23.857	23.58	23.891	23.75	31.357	330.064	20.983	351.047	5.75482e+06	234	22	14
2012-08-23	31.819	30.431	31.9	22.151	30.313	31.793	31.941	29.716	23.757	23.83	23.964	23.82	24.174	31.724	277.192	31.2125	308.405	4.01071e+06	235	23	30
2012-08-24	30.896	31.141	31.684	16.847	21.213	31.938	30.397	28.382	23.873	23.891	23.892	24.03	24.296	31.555	309.02	33.8896	342.909	3.87536e+06	236	0	43
2012-08-25	31.015	31.885	31.327	18.33	26.336	29.133	28.331	30.308	24.046	23.906	23.794	23.758	23.797	30.305	234.211	5.029	239.24	2.94685e+06	237	1	57
2012-08-26	31.979	30.759	31.778	25.922	21.696	31.879	29.841	28.475	24.06	23.886	23.951	24.039	23.867	31.775	205.806	5.1951	211.001	3.03146e+06	238	3	4
2012-08-27	30.65	30.444	32	16.053	20.571	31.674	31.868	30.637	23.746	23.976	23.887	23.575	23.865	31.889	324.416	23.3614	347.777	5.16993e+06	239	4	17
2012-08-28	29.404	29.643	31.114	19.738	17.445	30.542	30.358	29.842	23.887	23.869	24.006	23.822	24.002	28.088	344.553	26.9874	371.541	5.60607e+06	240	5	32
2012-08-29	31.36	30.545	26.335	22.741	22.06	31.716	30.357	30.008	24.297	23.618	23.39	23.366	24.059	28.804	323.164	26.8235	349.987	4.8569e+06	241	6	47
2012-08-30	30.401	31.436	31.58	19.264	18.952	31.82	28.466	22.665	23.898	24.146	23.292	23.87	23.9	30.5	261.348	20.3294	281.678	3.76947e+06	242	7	58
2012-08-31	27.591	22.17	28.116	19.939	21.863	20.918	31.474	24.226	23.829	23.656	23.383	23.544	23.878	30.735	262.136	18.2984	280.434	4.88467e+06	243	9	14
																	0.0017

## Sheet: Corbin No Term
dd-mmm-yyyy	Tset1	Tset2	Tset3	Tset4	Tset5	Tset6	Tset7	Tset8	Tset9	Tset10	Tset11	Tset12	Tset13	Tset14	Pelec	Pdisc	Netcost	WattHours	DOY	Write_Hr	Write_Min
2012-07-25	35	35	35	35	35	35	35	35	23.889	23.889	23.889	23.889	23.889	35	0	0	0	0	213	17	59
2012-07-26	35	35	35	35	35	35	35	35	23.889	23.889	23.889	23.889	23.889	35	0	0	0	0	213	17	59
2012-07-27	35	35	35	35	35	35	35	35	23.889	23.889	23.889	23.889	23.889	35	0	0	0	0	213	17	59
2012-07-28	35	35	35	35	35	35	35	35	23.889	23.889	23.889	23.889	23.889	35	0	0	0	0	213	17	59
2012-07-29	35	35	35	35	35	35	35	35	23.889	23.889	23.889	23.889	23.889	35	0	0	0	0	213	17	59
2012-07-30	35	35	35	35	35	35	35	35	23.889	23.889	23.889	23.889	23.889	35	0	0	0	0	213	17	59
2012-07-31	35	35	35	35	35	35	35	35	23.889	23.889	23.889	23.889	23.889	35	0	0	0	0	213	17	59
2012-08-01	29.272	31.829	30.982	18.077	18.566	31.472	21.497	28.449	23.656	23.067	23.808	23.658	23.998	31.403	398.952	279.06	678.012	4.80465e+06	213	19	14
2012-08-02	30.863	31.433	29.914	19.392	17.229	31.386	28.478	23.393	23.787	23.689	23.784	23.744	23.998	29.855	461.247	252.114	713.361	4.93437e+06	214	20	23
2012-08-03	30.216	30.362	21.936	21.651	18.42	31.799	31.447	31.663	23.95	23.718	23.824	23.868	23.999	31.848	625.318	318.109	943.427	6.3837e+06	215	21	31
2012-08-04	31.077	27.468	28.266	22.673	21.715	31.835	31.421	31.998	23.668	23.856	23.729	23.662	24	30.964	438.11	65.6264	503.736	5.17672e+06	216	22	40
2012-08-05	31.962	27.008	31.275	22.545	22.49	30.505	31.901	31.107	23.369	23.69	23.839	23.783	23.345	31.311	233.693	32.3366	266.03	3.75973e+06	217	23	50
2012-08-06	31.946	29.413	28.157	17.654	20.183	25.159	31.609	30.291	23.62	23.931	23.92	23.863	23.985	31.251	241.062	305.736	546.798	2.978e+06	218	0	57
2012-08-07	28.246	31.865	27.525	18.238	19.291	30.391	30.92	29.58	23.955	23.893	23.582	23.43	23.979	31.933	297.092	289.094	586.186	2.6306e+06	219	2	6
2012-08-08	31.034	31.195	21.104	20.718	20.407	29.937	26.47	31.176	23.832	23.335	23.853	23.84	23.998	32	400.711	285.474	686.185	2.86509e+06	220	3	16
2012-08-09	28.167	31.677	31.451	16.747	20.646	30.109	26.674	29.522	23.913	23.735	23.985	23.695	23.998	31.093	441.993	309.043	751.037	3.6045e+06	221	4	18
2012-08-10	31.965	30.103	30.084	19.243	20.26	29.777	31.852	29.87	23.976	23.806	23.903	23.472	24	29.783	331.829	308.574	640.403	3.88122e+06	222	5	25
2012-08-11	31.187	27.751	30.234	22.451	17.146	29.701	27.299	30.285	23.913	23.858	23.869	23.791	23.793	30.476	220.849	56.7133	277.562	3.28277e+06	223	6	32
2012-08-12	31.762	31.697	27.58	19.213	20.351	31.226	27.609	31.56	23.585	23.427	23.779	23.783	23.299	31.288	235.717	27.2231	262.94	3.26041e+06	224	7	44
2012-08-13	31.279	31.321	30.096	20.383	16.34	31.761	27.066	30.39	23.998	23.565	23.369	23.485	23.998	30.637	347.552	271.181	618.733	3.8972e+06	225	9	5
2012-08-14	28.018	27.684	28.331	21.288	20.95	20.823	31.905	29.96	23.464	23.594	23.698	23.758	23.984	29.093	309.95	269.8	579.751	4.32332e+06	226	10	7
2012-08-15	30.723	31.254	31.824	19.844	31.003	27.113	25.775	29.209	23.896	23.669	23.935	23.899	24	29.918	350.109	314.223	664.332	4.01534e+06	227	11	19
2012-08-16	26.698	21.711	30.092	25.794	17.572	31.708	31.734	30.254	23.481	23.881	23.909	23.74	23.999	30.383	320.616	298.647	619.263	3.34465e+06	228	12	33
2012-08-17	26.639	22.277	30.34	27.16	16.633	30.633	28.864	29.035	23.855	23.546	23.887	23.831	23.985	31.758	267.803	297.836	565.639	3.18687e+06	229	13	47
2012-08-18	30.656	30.699	31.113	27.521	25.982	30.765	27.316	30.568	23.841	23.459	23.752	23.589	23.833	29.991	155.745	55.381	211.126	2.41236e+06	230	15	3
2012-08-19	31.108	31.371	31.646	21.988	26.021	31.697	30.252	29.916	23.883	23.685	23.862	23.835	23.685	31.092	141.574	48.1742	189.748	2.66594e+06	231	16	14
2012-08-20	31.176	29.925	26.821	29.049	31.994	29.515	28.244	31.969	23.967	23.624	23.923	23.878	23.998	27.982	275	326.959	601.96	4.00381e+06	232	17	23
2012-08-21	28.968	29.588	27.89	17.877	28.428	21.421	30.372	30.846	23.921	23.731	23.956	23.465	23.992	30.017	280.903	307.998	588.901	4.15884e+06	233	18	36
2012-08-22	31.201	31.499	30.618	29.671	29.42	31.696	22.66	28.476	23.983	23.752	23.702	23.81	23.986	31.69	328.447	317.383	645.83	5.21944e+06	234	19	43
2012-08-23	31.413	31.633	27.326	27.564	22.321	30.01	31.694	31.735	23.922	23.879	23.797	23.716	23.997	31.007	295.95	331.649	627.599	4.23658e+06	235	20	51
2012-08-24	30.041	31.714	21.997	30.379	21.999	31.839	30.299	31.405	23.851	23.86	23.864	23.968	23.997	30.011	323.073	323.509	646.582	3.89575e+06	236	22	4
2012-08-25	31.374	31.429	27.687	29.252	30.781	30.384	30.607	30.285	23.299	23.501	23.368	23.523	23.697	31.765	229.364	44.3244	273.688	2.64894e+06	237	23	9
2012-08-26	27.539	31.361	31.901	26.158	29.613	27.602	31.994	29.148	23.798	23.151	23.717	23.838	23.695	31.468	200.702	43.5373	244.239	2.80143e+06	238	0	19
2012-08-27	31.303	31.308	29.611	20.044	21.201	28.179	27.844	31.388	23.62	23.74	23.923	23.999	23.97	31.558	319.385	298.685	618.07	5.05174e+06	239	1	41
2012-08-28	31.73	31.169	31.499	21.216	21.933	30.192	31.121	30.639	23.959	23.862	23.97	23.94	23.929	31.518	341.665	309.034	650.698	5.33132e+06	240	2	58
2012-08-29	31.335	31.754	31.144	22.451	28.983	31.544	30.905	31.837	23.655	23.926	23.632	23.934	24	31.311	321.175	316.998	638.173	4.63115e+06	241	4	1
2012-08-30	31.04	31.929	20.946	19.495	19.101	31.636	30.45	31.875	23.763	23.362	23.897	23.69	23.953	31.811	257.197	276.369	533.566	3.79498e+06	242	4	49
2012-08-31	31.384	27.566	32	21.005	19.011	25.01	28.045	31.545	23.524	23.944	23.774	23.893	23.998	31.175	249.383	305.324	554.707	4.46188e+06	243	5	40
																	0.0017
										22.5
