# Supplementary material for: Multi-Objective Control of Air Conditioning Improves Cost, Comfort and System Energy Balance
Source: Preprints.org preprint supplement (doi:10.20944/preprints201808.0120.v3), 2018-09-10
Supplement: Supplementary file 7 [file Linear Building Model.xlsx]

## Sheet: RefBldgLargeOfficeNew2004_Chica
data from calibrate_loew() in benchmarks.py (night setback at 22.5 degrees)			CORE_MID:Zone Air Temperature [C](Hourly)	PERIMETER_MID_ZN_1:Zone Air Temperature [C](Hourly)	PERIMETER_MID_ZN_2:Zone Air Temperature [C](Hourly)	PERIMETER_MID_ZN_3:Zone Air Temperature [C](Hourly)	PERIMETER_MID_ZN_4:Zone Air Temperature [C](Hourly)				GHI coeff	offset				0.9957	l0123	-0.775
could also come from `runenergyplus RefBldgLargeOfficeNew2004_Chicago_August.idf USA_IL_Chicago-OHare.Intl.AP.725300_TMY3.epw` in the RefLargeOfficeBuilding dir		Peak Population	145	20	12	20	12				0.02	-6				0.9957	0.0061	-0.059
Date/Time	Environment:Site Outdoor Air Drybulb Temperature [C](Hourly)	BUILDING_ROOF:Surface Outside Face Incident Solar Radiation Rate per Area [W/m2](Hourly)	CORE_MID:Zone Air Temperature [C](Hourly)	PERIMETER_MID_ZN_1:Zone Air Temperature [C](Hourly)	PERIMETER_MID_ZN_2:Zone Air Temperature [C](Hourly)	PERIMETER_MID_ZN_3:Zone Air Temperature [C](Hourly)	PERIMETER_MID_ZN_4:Zone Air Temperature [C](Hourly)	Whole Building:Facility Total HVAC Electric Demand Power [W](Hourly)	BLDG_OCC_SCH:Schedule Value [](Hourly)	Energy in (MWh)	Outdoor T0	Prev Hour T	T	fitted T		Prev Hour T	Outdoor T0	Energy in (MWh)
08/01 01:00:00	19.4375	0	24.2728	24.1806	24.159	24.0451	24.6562	2.20054	0	2.20054e-06	13.4375		24.2576			0.987741	0.0342778	-2.33563	0	#N/A	#N/A
08/01 02:00:00	19.9125	0	24.2799	24.2011	24.1743	24.0582	24.6566	2.20254	0	2.20254e-06	13.9125	24.2576	24.2667	24.4372		0.00283087	0.00426138	0.18269	#N/A	#N/A	#N/A
08/01 03:00:00	19.0667	0	24.2865	24.1151	24.083	23.9689	24.545	2.20377	0	2.20377e-06	13.0667	24.2667	24.2429	24.4171		0.999312	0.616345	#N/A	#N/A	#N/A	#N/A
08/01 04:00:00	18.2125	0	24.29	24.0085	23.9705	23.86	24.4128	2.2045	0	2.2045e-06	12.2125	24.2429	24.2106	24.3643		358298	740	#N/A	#N/A	#N/A	#N/A
08/01 05:00:00	17.8	2.81581	24.2917	23.9118	23.8779	23.7642	24.2923	3.52773	0	3.52773e-06	11.8563	24.2106	24.1811	24.3202		408332	281.112	#N/A	#N/A	#N/A	#N/A
08/01 06:00:00	18.0708	46.3865	24.2995	23.9834	24.3759	23.9006	24.3442	3.08765	0	3.08765e-06	12.9986	24.1811	24.238	24.3303		#N/A	#N/A	#N/A	#N/A	#N/A	#N/A
08/01 07:00:00	19.2208	185.742	24.3415	24.4121	25.2212	24.4319	24.7635	8.37894	0	8.37894e-06	16.9357	24.238	24.4316	24.5214		#N/A	#N/A	#N/A	#N/A	#N/A	#N/A
08/01 08:00:00	21.1917	291.55	25.7698	26.1123	26.6371	26.1148	26.193	159064	1	0.159064	21.0227	24.4316	25.9097	24.4812
08/01 09:00:00	23.1208	401.022	23.2403	22.8099	22.72	22.8483	22.621	498080	1	0.49808	25.1413	25.9097	23.0962	25.2905
08/01 10:00:00	24.8208	710.424	22.7427	22.5062	22.5087	22.5171	22.5016	460895	1	0.460895	33.0293	23.0962	22.6712	22.8687
08/01 11:00:00	26.1958	856.927	22.5136	22.5045	22.5011	22.5016	22.5012	454896	0.8	0.454896	37.3344	22.6712	22.5101	22.6106
08/01 12:00:00	26.9708	907.676	22.5006	22.5007	22.5005	22.5005	22.5005	370821	0.4	0.370821	39.1243	22.5101	22.5006	22.7092
08/01 13:00:00	27.2	831.498	22.5014	22.5334	22.5014	22.5014	22.5013	432073	0.8	0.432073	37.83	22.5006	22.5045	22.5123
08/01 14:00:00	27.525	615.389	22.5022	22.5303	22.5016	22.5447	22.5016	480792	1	0.480792	33.8328	22.5045	22.5089	22.2653
08/01 15:00:00	27.2042	610.267	22.5122	22.5014	22.5014	22.5356	22.5015	474939	1	0.474939	33.4095	22.5089	22.5121	22.2689
08/01 16:00:00	27.2958	567.912	22.5222	22.5014	22.5014	22.5056	22.5016	469796	1	0.469796	32.6541	22.5121	22.5162	22.2582
08/01 17:00:00	27.475	393.633	22.5232	22.5013	22.5013	22.5013	22.5411	459963	1	0.459963	29.3477	22.5162	22.5188	22.1719
08/01 18:00:00	26.6042	202.257	22.5006	22.5004	22.5004	22.5004	22.5007	337588	0.5	0.337588	24.6493	22.5188	22.5006	22.2991
08/01 19:00:00	26.1	54.9528	22.5001	22.5003	22.5003	22.5003	22.5003	254201	0	0.254201	21.1991	22.5006	22.5001	22.3577
08/01 20:00:00	24.5833	0.988997	23.8076	24.3741	24.4129	24.4111	25.0243	7.49676	0	7.49676e-06	18.6031	22.5001	24.0242	22.862
08/01 21:00:00	23.0292	0	24.1945	24.6505	24.6694	24.5876	25.2271	3.52861	0	3.52861e-06	17.0292	24.0242	24.3623	24.3134
08/01 22:00:00	20.6875	0	24.2388	24.5127	24.5178	24.4118	25.0591	2.20452	0	2.20452e-06	14.6875	24.3623	24.3447	24.5671
08/01 23:00:00	18.9	0	24.262	24.2941	24.288	24.1797	24.8188	2.20466	0	2.20466e-06	12.9	24.3447	24.2906	24.4884
08/01 24:00:00	18.575	0	24.2724	24.2014	24.185	24.0744	24.7001	2.20494	0	2.20494e-06	12.575	24.2906	24.2662	24.4239
08/02 01:00:00	18.0292	0	24.2789	24.1044	24.081	23.9699	24.5762	2.20417	0	2.20417e-06	12.0292	24.2662	24.2383	24.3811
08/02 02:00:00	17.475	0	24.2828	23.9987	23.9682	23.8585	24.4444	2.20432	0	2.20432e-06	11.475	24.2383	24.2062	24.3345
08/02 03:00:00	17.525	0	24.2843	23.9252	23.8882	23.7803	24.3466	2.2044	0	2.2044e-06	11.525	24.2062	24.1826	24.3045
08/02 04:00:00	17.475	0	24.2846	23.8676	23.8248	23.7194	24.266	2.20433	0	2.20433e-06	11.475	24.1826	24.1631	24.2794
08/02 05:00:00	17.7958	3.26187	24.2847	23.8066	23.8043	23.664	24.1837	3.52553	0	3.52553e-06	11.8611	24.1631	24.1462	24.2735
08/02 06:00:00	18.3	69.3419	24.3047	23.9404	24.7573	24.0497	24.3139	3.08597	0	3.08597e-06	13.6868	24.1462	24.272	24.3193
08/02 07:00:00	20.1417	225.787	24.3494	24.336	25.9752	24.5137	24.7094	8.37552	0	8.37552e-06	18.6574	24.272	24.4779	24.614
08/02 08:00:00	22.8917	418.947	25.819	26.0689	27.1438	26.1597	26.1694	184122	1	0.184122	25.2706	24.4779	25.9717	24.614
08/02 09:00:00	25.4167	602.13	23.2663	22.7627	23.6468	22.909	22.6238	514060	1	0.51406	31.4593	25.9717	23.1689	25.531
08/02 10:00:00	26.9708	753.868	22.7626	22.5097	23.1079	22.6145	22.5016	494203	1	0.494203	36.0482	23.1689	22.729	22.9662
08/02 11:00:00	28.1208	857.606	22.5195	22.5159	22.6211	22.5108	22.5012	482683	0.8	0.482683	39.273	22.729	22.5231	22.6692
08/02 12:00:00	28.9	911.473	22.5006	22.5012	22.5004	22.5006	22.5005	391466	0.4	0.391466	41.1295	22.5231	22.5007	22.7425
08/02 13:00:00	29.1708	908	22.5014	22.6275	22.5013	22.5013	22.5013	457037	0.8	0.457037	41.3308	22.5007	22.5135	22.5741
08/02 14:00:00	29.4	846.211	22.5109	22.814	22.5016	22.6702	22.5016	521021	1	0.521021	40.3242	22.5135	22.5541	22.4028
08/02 15:00:00	29.4	731.442	22.5365	22.7381	22.5015	22.7111	22.5015	535295	1	0.535295	38.0288	22.5541	22.5685	22.3309
08/02 16:00:00	29.4	573.532	22.5463	22.536	22.5014	22.654	22.5324	544726	1	0.544726	34.8706	22.5685	22.5522	22.2149
08/02 17:00:00	29.1292	387.191	22.5445	22.5017	22.5014	22.5232	22.6081	545377	1	0.545377	30.873	22.5522	22.5395	22.0602
08/02 18:00:00	27.9792	195.316	22.5007	22.5006	22.5006	22.5006	22.5017	416850	0.5	0.41685	25.8855	22.5395	22.5007	22.1769
08/02 19:00:00	26.6042	52.2279	22.5001	22.5009	22.501	22.501	22.5011	290069	0	0.290069	21.6487	22.5007	22.5004	22.2895
08/02 20:00:00	25.1792	1.00254	23.823	24.4782	24.6035	24.4875	25.0749	7.49444	0	7.49444e-06	19.1992	22.5004	24.066	22.8826
08/02 21:00:00	23.8042	0	24.2191	24.82	24.9545	24.7384	25.344	3.5253	0	3.5253e-06	17.8042	24.066	24.4331	24.3812
08/02 22:00:00	23.3	0	24.2702	24.8039	24.9329	24.6843	25.294	2.20419	0	2.20419e-06	17.3	24.4331	24.4578	24.7266
08/02 23:00:00	23.0292	0	24.3018	24.7851	24.9058	24.6455	25.2555	2.20431	0	2.20431e-06	17.0292	24.4578	24.4704	24.7416
08/02 24:00:00	22.475	0	24.3225	24.7264	24.8394	24.5753	25.1821	2.20435	0	2.20435e-06	16.475	24.4704	24.4644	24.7351
08/03 01:00:00	21.9292	0	24.3373	24.6479	24.7531	24.4918	25.0898	2.20349	0	2.20349e-06	15.9292	24.4644	24.4489	24.7105
08/03 02:00:00	21.7	0	24.3485	24.5804	24.6759	24.4222	25.0056	2.20328	0	2.20328e-06	15.7	24.4489	24.4343	24.6873
08/03 03:00:00	21.375	0	24.3578	24.5194	24.6047	24.3591	24.9243	2.20305	0	2.20305e-06	15.375	24.4343	24.4201	24.6618
08/03 04:00:00	21.425	0	24.3655	24.4704	24.5472	24.3091	24.8535	2.20273	0	2.20273e-06	15.425	24.4201	24.4086	24.6495
08/03 05:00:00	21.7	3.51381	24.3739	24.4601	24.5584	24.3043	24.8234	3.52526	0	3.52526e-06	15.7703	24.4086	24.4119	24.65
08/03 06:00:00	22.2958	64.9079	24.4086	24.6296	25.6255	24.6617	24.9744	3.08359	0	3.08359e-06	17.594	24.4119	24.5564	24.7157
08/03 07:00:00	23.9917	199.436	24.4662	25.0901	26.3693	25.1845	25.4353	8.37196	0	8.37196e-06	21.9804	24.5564	24.7595	25.0087
08/03 08:00:00	25.9208	386.503	25.8014	26.4036	26.7815	26.4571	26.4249	260717	1	0.260717	27.6509	24.7595	26.0138	24.7949
08/03 09:00:00	27.5667	524.288	23.4654	23.2183	23.7479	23.4888	22.7351	620028	1	0.620028	32.0524	26.0138	23.4183	25.3454
08/03 10:00:00	28.8958	656.284	22.9566	22.8308	23.1971	23.1729	22.5019	627611	1	0.627611	36.0215	23.4183	22.953	22.9001
08/03 11:00:00	30.05	746.384	22.6946	22.8252	22.7737	23.1652	22.5016	635030	0.8	0.63503	38.9777	22.953	22.7456	22.5245
08/03 12:00:00	30.6	777.43	22.5012	22.5164	22.5015	22.76	22.5011	544639	0.4	0.544639	40.1486	22.7456	22.5274	22.5709
08/03 13:00:00	30.6	831.472	22.5014	22.7572	22.5017	23.0503	22.5016	597228	0.8	0.597228	41.2294	22.5274	22.5784	22.2696
08/03 14:00:00	31.1958	789.703	22.6807	23.0849	22.7626	23.4104	22.5016	639958	1	0.639958	40.9899	22.5784	22.7836	22.212
08/03 15:00:00	31.7	620.823	22.7718	23.0321	22.8199	23.5	22.5021	653242	1	0.653242	38.1165	22.7836	22.8536	22.2851
08/03 16:00:00	31.7	506.475	22.783	22.8576	22.7186	23.4355	22.5745	643936	1	0.643936	35.8295	22.8536	22.8369	22.2977
08/03 17:00:00	31.1042	339.414	22.7837	22.9003	22.5478	23.2751	22.5253	638395	1	0.638395	31.8924	22.8369	22.8135	22.1591
08/03 18:00:00	30.6	174.549	22.5028	22.5051	22.5012	22.5699	22.5012	548594	0.5	0.548594	28.091	22.8135	22.5093	22.2154
08/03 19:00:00	29.95	46.1589	22.5001	22.5016	22.5017	22.5017	22.5018	341068	0	0.341068	24.8732	22.5093	22.5006	22.2893
08/03 20:00:00	29.4	0	23.9151	24.9185	25.0432	25.0441	25.2704	7.48999	0	7.48999e-06	23.4	22.5006	24.2617	23.0269
08/03 21:00:00	27.6125	0	24.3512	25.4383	25.5862	25.5272	25.7309	3.526	0	3.526e-06	21.6125	24.2617	24.7179	24.7051
08/03 22:00:00	25.8292	0	24.4211	25.3684	25.5146	25.4169	25.6304	2.20325	0	2.20325e-06	19.8292	24.7179	24.7393	25.0946
08/03 23:00:00	25.6	0	24.4602	25.3507	25.4921	25.3811	25.6005	2.20303	0	2.20303e-06	19.6	24.7393	24.7583	25.1078
08/03 24:00:00	25.8708	0	24.4874	25.3651	25.5012	25.3802	25.606	2.2027	0	2.2027e-06	19.8708	24.7583	24.7793	25.1359
08/04 01:00:00	26.1	0	24.6909	25.525	25.6552	25.5377	25.7573	2.20194	0	2.20194e-06	20.1	24.7793	24.9683	25.1645
08/04 02:00:00	24.5833	0	24.8076	25.5075	25.6284	25.5113	25.7264	2.20225	0	2.20225e-06	18.5833	24.9683	25.0418	25.2992
08/04 03:00:00	23.8958	0	24.8601	25.4166	25.5269	25.403	25.6193	2.20253	0	2.20253e-06	17.8958	25.0418	25.0472	25.3483
08/04 04:00:00	24.4	0	24.9041	25.458	25.5646	25.4412	25.6527	2.20265	0	2.20265e-06	18.4	25.0472	25.0894	25.3708
08/04 05:00:00	24.1292	2.29421	24.9468	25.4492	25.5519	25.4278	25.6328	3.52403	0	3.52403e-06	18.1751	25.0894	25.115	25.4048
08/04 06:00:00	23.9	36.8257	25.0841	25.5962	25.7384	25.5843	25.7694	3.08437	0	3.08437e-06	18.6365	25.115	25.2579	25.446
08/04 07:00:00	23.575	89.2247	25.1905	25.8681	26.0794	25.8685	26.039	4.84457	0	4.84457e-06	19.3595	25.2579	25.42	25.6119
08/04 08:00:00	23.8958	111.107	25.3813	26.1554	26.3343	26.1579	26.2431	101488	0.1	0.101488	20.118	25.42	25.6339	25.5609
08/04 09:00:00	25.3208	218.691	22.7729	22.7492	22.6752	22.7964	22.6184	587640	0.3	0.58764	23.6947	25.6339	22.7584	24.7593
08/04 10:00:00	26.6958	301.798	22.5007	22.5014	22.5013	22.5014	22.5014	514148	0.3	0.514148	26.7318	22.7584	22.5009	22.1949
08/04 11:00:00	28.3917	360.302	22.5003	22.5008	22.5009	22.5009	22.5009	497802	0	0.497802	29.5977	22.5009	22.5005	22.077
08/04 12:00:00	29.725	472.302	22.5002	22.5008	22.5008	22.5008	22.5008	492549	0	0.492549	33.171	22.5005	22.5004	22.2113
08/04 13:00:00	30.325	790.461	22.5003	22.5011	22.5011	22.5011	22.5011	510763	0.3	0.510763	40.1342	22.5004	22.5006	22.4073
08/04 14:00:00	30.6	732.066	22.5004	22.501	22.5011	22.501	22.5011	497785	0.3	0.497785	39.2413	22.5006	22.5006	22.4072
08/04 15:00:00	30.8708	536.325	22.5004	22.5011	22.5011	22.5011	22.5011	490333	0.3	0.490333	35.5973	22.5006	22.5006	22.2997
08/04 16:00:00	31.1	499.271	22.5003	22.5011	22.5011	22.5011	22.5011	488844	0.2	0.488844	35.0854	22.5006	22.5006	22.2857
08/04 17:00:00	31.1	319.37	22.5003	22.501	22.501	22.501	22.501	466910	0.2	0.46691	31.4874	22.5006	22.5005	22.2135
08/04 18:00:00	30.5042	152.204	22.5003	22.5011	22.5011	22.5011	22.5011	352717	0.1	0.352717	27.5482	22.5005	22.5005	22.3451
08/04 19:00:00	29.4042	41.8687	22.5002	22.5023	22.5024	22.5023	22.5026	343800	0	0.3438	24.2415	22.5005	22.5008	22.2527
08/04 20:00:00	28.575	0	23.6323	24.6029	24.6648	24.6653	25.0661	3.08278	0	3.08278e-06	22.575	22.5008	23.9656	22.9988
08/04 21:00:00	28.0292	0	24.1265	25.1756	25.2391	25.2046	25.5848	3.96443	0	3.96443e-06	22.0292	23.9656	24.4776	24.4269
08/04 22:00:00	28.0708	0	24.2536	25.3096	25.3656	25.3151	25.6864	2.20222	0	2.20222e-06	22.0708	24.4776	24.6024	24.9341
08/04 23:00:00	28.3	0	24.3362	25.4127	25.4608	25.4028	25.7724	2.20241	0	2.20241e-06	22.3	24.6024	24.6884	25.0652
08/04 24:00:00	24.725	0	24.4054	25.2902	25.3226	25.268	25.6319	2.20262	0	2.20262e-06	18.725	24.6884	24.6957	25.0275
08/05 01:00:00	20.7792	0	24.4593	24.934	24.9485	24.8989	25.2607	1.76206	0	1.76206e-06	14.7792	24.6957	24.6209	24.8995
08/05 02:00:00	20.325	0	24.5046	24.8055	24.8135	24.766	25.1256	1.76173	0	1.76173e-06	14.325	24.6209	24.6118	24.8101
08/05 03:00:00	20.6	0	24.5493	24.7944	24.7952	24.7495	25.0976	1.76038	0	1.76038e-06	14.6	24.6118	24.6375	24.8105
08/05 04:00:00	20.275	0	24.5928	24.7507	24.745	24.7018	25.0394	1.76135	0	1.76135e-06	14.275	24.6375	24.6528	24.8248
08/05 05:00:00	20.325	2.36933	24.6349	24.7148	24.7074	24.6653	24.9897	3.0824	0	3.0824e-06	14.3724	24.6528	24.67	24.8432
08/05 06:00:00	20.8708	39.2752	24.6766	24.8341	24.8873	24.8011	25.0975	1.76171	0	1.76171e-06	15.6563	24.67	24.7399	24.9042
08/05 07:00:00	21.425	114.154	24.7326	25.17	25.4835	25.1522	25.4264	1.76219	0	1.76219e-06	17.7081	24.7399	24.8976	25.0436
08/05 08:00:00	22.2958	204.944	24.87	25.6977	26.2344	25.656	25.9304	1.76135	0.1	1.76135e-06	20.3947	24.8976	25.1637	25.2914
08/05 09:00:00	23.0708	317.202	22.6367	22.6283	22.6157	22.6289	22.595	447501	0.3	0.447501	23.4149	25.1637	22.6316	24.6126
08/05 10:00:00	24.5458	684.735	22.5006	22.5028	22.5029	22.5028	22.5028	316969	0.3	0.316969	32.2405	22.6316	22.5013	22.719
08/05 11:00:00	26.4667	706.463	22.5003	22.5021	22.5021	22.5022	22.5022	301626	0	0.301626	34.5959	22.5013	22.5008	22.7068
08/05 12:00:00	27.7958	817.169	22.5001	22.5022	22.5022	22.5021	22.5022	306976	0	0.306976	38.1392	22.5008	22.5007	22.8154
08/05 13:00:00	28.3	463.213	22.5002	22.5024	22.5026	22.5025	22.5026	315143	0.3	0.315143	31.5643	22.5007	22.5009	22.5708
08/05 14:00:00	28.0292	352.553	22.5003	22.5023	22.5023	22.5022	22.5022	299631	0.3	0.299631	29.0802	22.5009	22.5009	22.5221
08/05 15:00:00	28.9917	569.805	22.5004	22.5016	22.5016	22.5016	22.5017	281696	0.3	0.281696	34.3878	22.5009	22.5007	22.7459
08/05 16:00:00	30	497.213	22.5003	22.5015	22.5015	22.5015	22.5016	286575	0.2	0.286575	33.9443	22.5007	22.5007	22.7191
08/05 17:00:00	29.675	369.686	22.5003	22.5015	22.5015	22.5015	22.5016	285128	0.2	0.285128	31.0687	22.5007	22.5007	22.6239
08/05 18:00:00	28.5333	203.336	22.5002	22.5014	22.5014	22.5014	22.5014	276317	0.1	0.276317	26.6	22.5007	22.5006	22.4912
08/05 19:00:00	26.8792	52.8182	22.5001	22.5013	22.5013	22.5014	22.5014	267859	0	0.267859	21.9355	22.5006	22.5005	22.351
08/05 20:00:00	25.1792	0	23.5017	24.217	24.2792	24.3398	24.8884	1.76128	0	1.76128e-06	19.1792	22.5005	23.7746	22.8821
08/05 21:00:00	24.1292	0	23.9413	24.6233	24.6711	24.664	25.2046	3.08244	0	3.08244e-06	18.1292	23.7746	24.1902	24.1046
08/05 22:00:00	23.9	0	24.0513	24.681	24.7203	24.6855	25.2203	1.76166	0	1.76166e-06	17.9	24.1902	24.2778	24.5072
08/05 23:00:00	22.9792	0	24.1234	24.654	24.6817	24.6378	25.1714	1.76219	0	1.76219e-06	16.9792	24.2778	24.3156	24.5622
08/05 24:00:00	22.2	0	24.1823	24.5605	24.5775	24.5329	25.071	1.76142	0	1.76142e-06	16.2	24.3156	24.3258	24.5728
08/06 01:00:00	21.0083	0	24.0619	24.3276	24.3432	24.2996	24.8393	2.20049	0	2.20049e-06	15.0083	24.3258	24.1709	24.542
08/06 02:00:00	20	0	24.0016	24.1348	24.1453	24.1039	24.6277	2.20061	0	2.20061e-06	14	24.1709	24.0683	24.3545
08/06 03:00:00	19.675	0	24.0005	24.0452	24.0491	24.0088	24.5094	2.20093	0	2.20093e-06	13.675	24.0683	24.0376	24.242
08/06 04:00:00	18.8042	0	24.0075	23.9272	23.9244	23.8864	24.3609	2.20117	0	2.20117e-06	12.8042	24.0376	24.0038	24.1818
08/06 05:00:00	18.0292	2.84325	24.0159	23.8044	23.8434	23.766	24.2098	3.52253	0	3.52253e-06	12.086	24.0038	23.9729	24.1238
08/06 06:00:00	18.0708	68.9405	24.0478	23.8811	24.8293	24.1009	24.2818	3.08207	0	3.08207e-06	13.4496	23.9729	24.0952	24.1401
08/06 07:00:00	19.2208	230.461	24.0992	24.2103	26.0609	24.4964	24.6079	8.36453	0	8.36453e-06	17.8301	24.0952	24.2897	24.411
08/06 08:00:00	20.5958	392.805	25.6394	25.9835	27.3393	26.1527	26.1416	105203	1	0.105203	22.4519	24.2897	25.8479	24.5158
08/06 09:00:00	21.425	335.374	23.0373	22.6844	22.9244	22.7547	22.5973	420218	1	0.420218	22.1325	25.8479	22.9447	25.3082
08/06 10:00:00	21.375	283.513	22.582	22.5013	22.5012	22.5013	22.5013	430345	1	0.430345	21.0453	22.9447	22.5573	22.3797
08/06 11:00:00	18.9875	217.381	22.5015	22.5008	22.5008	22.5008	22.5008	332635	0.8	0.332635	17.3351	22.5573	22.5013	22.0981
08/06 12:00:00	16.6042	259.532	22.5006	22.5004	22.5003	22.5004	22.5004	238342	0.4	0.238342	15.7948	22.5013	22.5006	22.2102
08/06 13:00:00	16.6958	392.516	22.5015	22.5012	22.5012	22.5012	22.5012	275890	0.8	0.27589	18.5462	22.5006	22.5014	22.2161
08/06 14:00:00	17.525	462.351	22.5018	22.5014	22.5014	22.5162	22.5014	291560	1	0.29156	20.772	22.5014	22.5031	22.2566
08/06 15:00:00	16.8792	294.301	22.5023	22.502	22.502	22.502	22.5021	275896	1	0.275896	16.7652	22.5031	22.5022	22.1576
08/06 16:00:00	15.8292	247.344	22.5024	22.5018	22.5018	22.5018	22.5018	267491	1	0.267491	14.776	22.5022	22.5022	22.1081
08/06 17:00:00	15.8708	169.269	22.5018	22.5012	22.5012	22.5012	22.5012	255003	1	0.255003	13.2562	22.5022	22.5016	22.0851
08/06 18:00:00	16.425	150.782	22.5012	22.501	22.501	22.501	22.501	200331	0.5	0.200331	13.4406	22.5016	22.5011	22.2186
08/06 19:00:00	16.1042	47.0325	22.5005	22.5003	22.5003	22.5003	22.5003	138878	0	0.138878	11.0448	22.5011	22.5005	22.2795
08/06 20:00:00	14.6792	0	23.7347	23.5064	23.6397	23.6025	23.9154	7.4845	0	7.4845e-06	8.67917	22.5005	23.7051	22.5221
08/06 21:00:00	13.3042	0	24.0692	23.474	23.6204	23.531	23.7831	3.52055	0	3.52055e-06	7.30417	23.7051	23.9185	23.6649
08/06 22:00:00	12.8	0	24.0829	23.3369	23.4753	23.3738	23.5971	2.20111	0	2.20111e-06	6.8	23.9185	23.8809	23.8584
08/06 23:00:00	12.475	0	24.0853	23.2099	23.3373	23.2356	23.444	2.20126	0	2.20126e-06	6.475	23.8809	23.8405	23.81
08/06 24:00:00	12.2	0	24.079	23.0728	23.1889	23.091	23.2871	2.20139	0	2.20139e-06	6.2	23.8405	23.7916	23.7607
08/07 01:00:00	11.9292	0	24.0668	22.9477	23.053	22.9608	23.1449	2.20077	0	2.20077e-06	5.92917	23.7916	23.7427	23.7032
08/07 02:00:00	12.2958	0	24.0519	22.8629	22.9586	22.872	23.0449	2.20067	0	2.20067e-06	6.29583	23.7427	23.7046	23.6675
08/07 03:00:00	12.8	0	24.0377	22.8132	22.9004	22.819	22.9815	2.20046	0	2.20046e-06	6.8	23.7046	23.678	23.6471
08/07 04:00:00	12.2042	0	24.023	22.6917	22.7694	22.6948	22.8458	2.2001	0	2.2001e-06	6.20417	23.678	23.629	23.6004
08/07 05:00:00	11.7	1.539	24.0055	22.5514	22.6393	22.5542	22.6918	3.52052	0	3.52052e-06	5.73078	23.629	23.5736	23.5357
08/07 06:00:00	12.2958	70.2931	24.0057	22.6322	23.6185	22.8827	22.7817	3.07988	0	3.07988e-06	7.7017	23.5736	23.6743	23.5486
08/07 07:00:00	14.3167	242.693	24.0361	23.0192	24.9813	23.3456	23.1768	8.36155	0	8.36155e-06	13.1705	23.6743	23.8777	23.8355
08/07 08:00:00	16.4667	423.981	25.7634	25.3694	27.8577	25.5544	25.4714	15.4034	1	1.54034e-05	18.9463	23.8777	25.8092	24.2344
08/07 09:00:00	18.3917	592.054	23.0854	22.6505	23.2848	22.6777	22.5935	268447	1	0.268447	24.2327	25.8092	22.988	25.6964
08/07 10:00:00	19.725	727.013	22.5767	22.5011	22.5913	22.5011	22.5011	280418	1	0.280418	28.2653	22.988	22.5587	23.0201
08/07 11:00:00	20.325	783.196	22.5015	22.5007	22.5007	22.5007	22.5007	266289	0.8	0.266289	29.9889	22.5587	22.5012	22.6882
08/07 12:00:00	20.6	660.591	22.5011	22.5008	22.5008	22.5008	22.5008	222017	0.4	0.222017	27.8118	22.5012	22.501	22.6602
08/07 13:00:00	21.1958	561.091	22.5012	22.5005	22.5005	22.5005	22.5005	256942	0.8	0.256942	26.4176	22.501	22.501	22.5306
08/07 14:00:00	21.1042	810.297	22.5009	22.5004	22.5004	22.5004	22.5004	298717	1	0.298717	31.3101	22.501	22.5007	22.6007
08/07 15:00:00	20.6	689.971	22.5006	22.5002	22.5002	22.5002	22.5002	301857	1	0.301857	28.3994	22.5007	22.5005	22.4933
08/07 16:00:00	20.275	543.713	22.5011	22.5008	22.5009	22.5008	22.5009	300798	1	0.300798	25.1493	22.5005	22.501	22.3842
08/07 17:00:00	20	323.351	22.5017	22.5014	22.5014	22.5014	22.5014	292706	1	0.292706	20.467	22.501	22.5016	22.2431
08/07 18:00:00	19.675	187.133	22.5011	22.5007	22.5007	22.5008	22.5007	224820	0.5	0.22482	17.4177	22.5016	22.501	22.2977
08/07 19:00:00	18.2083	46.564	22.5004	22.5002	22.5002	22.5002	22.5001	172078	0	0.172078	13.1396	22.501	22.5003	22.2736
08/07 20:00:00	16.3333	0	23.7106	23.534	23.7401	23.6324	24.0911	7.48056	0	7.48056e-06	10.3333	22.5003	23.7098	22.5787
08/07 21:00:00	14.95	0	24.0377	23.5327	23.758	23.5774	24.0267	3.52187	0	3.52187e-06	8.95	23.7098	23.9287	23.7259
08/07 22:00:00	14.1292	0	24.0498	23.3904	23.6021	23.4024	23.8367	2.20005	0	2.20005e-06	8.12917	23.9287	23.8868	23.914
08/07 23:00:00	13.575	0	24.0509	23.2562	23.4516	23.2488	23.674	2.20003	0	2.20003e-06	7.575	23.8868	23.842	23.8536
08/07 24:00:00	13.0292	0	24.0435	23.1175	23.2959	23.0962	23.5105	2.20032	0	2.20032e-06	7.02917	23.842	23.7907	23.7907
08/08 01:00:00	13.0708	0	24.0307	23.0098	23.1725	22.978	23.3792	2.20008	0	2.20008e-06	7.07083	23.7907	23.7456	23.7414
08/08 02:00:00	13.3	0	24.0161	22.9314	23.0796	22.8913	23.2783	2.2002	0	2.2002e-06	7.3	23.7456	23.7085	23.7047
08/08 03:00:00	13.0292	0	24.001	22.8268	22.9609	22.7802	23.1512	2.2003	0	2.2003e-06	7.02917	23.7085	23.6633	23.6588
08/08 04:00:00	12.2042	0	23.9836	22.6824	22.8028	22.6309	22.9843	2.20028	0	2.20028e-06	6.20417	23.6633	23.6045	23.5859
08/08 05:00:00	11.7	1.4326	23.9641	22.541	22.6631	22.4873	22.8214	3.51899	0	3.51899e-06	5.72865	23.6045	23.5463	23.5115
08/08 06:00:00	12.2958	58.6799	23.9625	22.6191	23.6046	22.7459	22.8884	3.08026	0	3.08026e-06	7.46943	23.5463	23.6353	23.5136
08/08 07:00:00	14.3167	211.895	23.9873	23.002	24.7476	23.2031	23.2694	8.35984	0	8.35984e-06	12.5546	23.6353	23.8204	23.7759
08/08 08:00:00	17.0625	407.747	25.7107	25.3527	27.7324	25.4179	25.5598	15.4007	1	1.54007e-05	19.2174	23.8204	25.7558	24.1871
08/08 09:00:00	19.5458	592.003	23.0427	22.6475	23.2876	22.665	22.5991	283699	1	0.283699	25.3859	25.7558	22.9574	25.6477
08/08 10:00:00	21.7917	698.055	22.5387	22.5006	22.5944	22.5006	22.5006	307256	1	0.307256	29.7528	22.9574	22.5324	22.9782
08/08 11:00:00	23.3958	694.345	22.5011	22.5007	22.5007	22.5007	22.5007	305196	0.8	0.305196	31.2827	22.5324	22.501	22.6157
08/08 12:00:00	23.575	804.666	22.5011	22.5009	22.5009	22.5009	22.5009	253330	0.4	0.25333	33.6683	22.501	22.501	22.7876
08/08 13:00:00	24.2208	771.759	22.5011	22.5003	22.5003	22.5003	22.5003	292984	0.8	0.292984	33.656	22.501	22.5009	22.6946
08/08 14:00:00	24.4042	522.728	22.5016	22.5011	22.5012	22.5025	22.5011	337172	1	0.337172	28.8587	22.5009	22.5016	22.4267
08/08 15:00:00	23.9	441.59	22.5015	22.5011	22.5011	22.5638	22.5011	344078	1	0.344078	26.7318	22.5016	22.5074	22.3384
08/08 16:00:00	24.1708	353.162	22.5015	22.5012	22.5011	22.5105	22.5011	356391	1	0.356391	25.2341	22.5074	22.5023	22.264
08/08 17:00:00	23.5333	249.405	22.5014	22.5011	22.501	22.5011	22.5011	350463	1	0.350463	22.5214	22.5023	22.5013	22.1799
08/08 18:00:00	22.8	136.167	22.5005	22.5003	22.5002	22.5003	22.5003	265879	0.5	0.265879	19.5233	22.5013	22.5005	22.2737
08/08 19:00:00	20.9583	21.95	22.5001	22.5	22.5	22.5	22.5	217183	0	0.217183	15.3973	22.5005	22.5001	22.2452
08/08 20:00:00	19.1292	0	23.6843	23.772	23.9972	23.7694	23.8693	7.47932	0	7.47932e-06	13.1292	22.5001	23.7294	22.6743
08/08 21:00:00	17.9792	0	24.0139	23.885	24.1443	23.8613	23.9686	3.52049	0	3.52049e-06	11.9792	23.7294	23.9918	23.8491
08/08 22:00:00	17.2	0	24.036	23.7774	24.0282	23.7374	23.8492	2.20012	0	2.20012e-06	11.2	23.9918	23.9715	24.0816
08/08 23:00:00	17.2	0	24.0459	23.7123	23.9508	23.6603	23.7764	2.19998	0	2.19998e-06	11.2	23.9715	23.9561	24.0615
08/08 24:00:00	17.2	0	24.0482	23.6492	23.8743	23.5883	23.7069	2.1996	0	2.1996e-06	11.2	23.9561	23.9364	24.0464
08/09 01:00:00	17.2	0	24.0462	23.5789	23.7902	23.511	23.6299	2.19893	0	2.19893e-06	11.2	23.9364	23.9117	24.0269
08/09 02:00:00	17.525	0	24.0411	23.5288	23.727	23.4555	23.5736	2.19919	0	2.19919e-06	11.525	23.9117	23.8911	24.0136
08/09 03:00:00	17.8	0	24.0348	23.5025	23.689	23.4256	23.5419	2.19947	0	2.19947e-06	11.8	23.8911	23.8774	24.0027
08/09 04:00:00	16.8792	0	24.0276	23.3895	23.5621	23.309	23.422	2.19968	0	2.19968e-06	10.8792	23.8774	23.8363	23.9576
08/09 05:00:00	15.8292	1.59489	24.0172	23.216	23.386	23.1349	23.2411	3.51972	0	3.51972e-06	9.86106	23.8363	23.7753	23.8821
08/09 06:00:00	15.6	57.5022	24.0244	23.2585	24.3704	23.3293	23.2786	3.08014	0	3.08014e-06	10.75	23.7753	23.8616	23.8523
08/09 07:00:00	17.0625	205.011	24.0602	23.5945	25.4041	23.7422	23.6236	8.35831	0	8.35831e-06	15.1627	23.8616	24.0373	24.0888
08/09 08:00:00	19.8167	371.946	25.6723	25.7472	27.2362	25.7844	25.6697	58270.5	1	0.0582705	21.2556	24.0373	25.7798	24.3352
08/09 09:00:00	22.0208	594.089	23.0281	22.6557	23.2639	22.6797	22.5739	391010	1	0.39101	27.9026	25.7798	22.9466	25.507
08/09 10:00:00	23.9917	748.926	22.5646	22.5016	22.8294	22.5015	22.5015	412840	1	0.41284	32.9702	22.9466	22.5641	22.8312
08/09 11:00:00	25.5958	808.544	22.5015	22.501	22.5038	22.501	22.501	382815	0.8	0.382815	35.7667	22.5641	22.5015	22.6194
08/09 12:00:00	26.425	790.96	22.5007	22.5004	22.5004	22.5004	22.5004	306432	0.4	0.306432	36.2442	22.5015	22.5006	22.7524
08/09 13:00:00	26.1042	478.952	22.5014	22.501	22.5011	22.5011	22.5011	342757	0.8	0.342757	29.6832	22.5006	22.5013	22.4417
08/09 14:00:00	26.4667	504.132	22.5017	22.5014	22.5014	22.6367	22.5014	391838	1	0.391838	30.5493	22.5013	22.5146	22.3574
08/09 15:00:00	26.0083	477.7	22.5015	22.5012	22.5012	22.7914	22.5012	406553	1	0.406553	29.5623	22.5146	22.5292	22.3023
08/09 16:00:00	24.675	338.382	22.5015	22.5013	22.5012	22.5721	22.5012	404813	1	0.404813	25.4426	22.5292	22.5082	22.1796
08/09 17:00:00	23.8042	202.108	22.5014	22.5012	22.5012	22.5012	22.5012	397234	1	0.397234	21.8463	22.5082	22.5014	22.0533
08/09 18:00:00	23.0292	109.092	22.5005	22.5003	22.5003	22.5003	22.5003	303313	0.5	0.303313	19.211	22.5014	22.5004	22.1756
08/09 19:00:00	21.8792	24.0872	22.5001	22.5002	22.5002	22.5002	22.5002	233001	0	0.233001	16.3609	22.5004	22.5001	22.2412
08/09 20:00:00	20.5042	0	23.7006	23.9166	24.1563	23.912	24.0402	7.47938	0	7.47938e-06	14.5042	22.5001	23.7872	22.7215
08/09 21:00:00	19.4042	0	24.0417	24.0687	24.3477	24.0395	24.1666	3.51799	0	3.51799e-06	13.4042	23.7872	24.0688	23.955
08/09 22:00:00	19.1708	0	24.0703	24.0005	24.2693	23.9544	24.0784	2.19968	0	2.19968e-06	13.1708	24.0688	24.0644	24.2252
08/09 23:00:00	18.5333	0	24.0854	23.9147	24.1684	23.8559	23.9781	2.19979	0	2.19979e-06	12.5333	24.0644	24.0457	24.199
08/09 24:00:00	17.8	0	24.0916	23.7856	24.0231	23.7181	23.8364	2.1997	0	2.1997e-06	11.8	24.0457	24.008	24.1554
08/10 01:00:00	17.8	0	24.0919	23.7106	23.933	23.6359	23.7509	2.19916	0	2.19916e-06	11.8	24.008	23.9831	24.1181
08/10 02:00:00	17.8	0	24.0891	23.6479	23.8557	23.5672	23.6787	2.19886	0	2.19886e-06	11.8	23.9831	23.96	24.0935
08/10 03:00:00	17.475	0	24.0846	23.5743	23.7675	23.489	23.5962	2.19855	0	2.19855e-06	11.475	23.96	23.9325	24.0596
08/10 04:00:00	17.2	0	24.078	23.487	23.6667	23.3988	23.5008	2.19874	0	2.19874e-06	11.2	23.9325	23.8997	24.023
08/10 05:00:00	16.9292	1.54487	24.0707	23.4056	23.579	23.3172	23.412	3.51978	0	3.51978e-06	10.9601	23.8997	23.8689	23.9824
08/10 06:00:00	16.9708	50.8409	24.071	23.4602	24.1491	23.461	23.4618	3.07836	0	3.07836e-06	11.9877	23.8689	23.9237	23.9872
08/10 07:00:00	18.3917	181.481	24.1047	23.8399	24.994	23.9039	23.8467	8.35662	0	8.35662e-06	16.0213	23.9237	24.0964	24.1795
08/10 08:00:00	20.9167	367.019	25.6737	25.875	26.9399	25.8614	25.7372	84005.7	1	0.0840057	22.257	24.0964	25.7873	24.3677
08/10 09:00:00	23.3917	549.864	23.0529	22.6679	23.0676	22.6919	22.5774	421220	1	0.42122	28.3889	25.7873	22.9551	25.4605
08/10 10:00:00	25.05	670.778	22.5957	22.5015	22.5829	22.5097	22.5015	432280	1	0.43228	32.4656	22.9551	22.5723	22.7769
08/10 11:00:00	26.1958	772.657	22.5017	22.5011	22.501	22.5016	22.5011	411189	0.8	0.411189	35.649	22.5723	22.5016	22.5572
08/10 12:00:00	26.9708	812.128	22.5007	22.5004	22.5004	22.5004	22.5004	335862	0.4	0.335862	37.2134	22.5016	22.5006	22.7169
08/10 13:00:00	27.525	773.106	22.5014	22.5013	22.5013	22.5449	22.5012	388145	0.8	0.388145	36.9871	22.5006	22.5056	22.586
08/10 14:00:00	28.0708	719.08	22.5017	22.5683	22.5014	22.8436	22.5014	432142	1	0.432142	36.4524	22.5056	22.5408	22.4699
08/10 15:00:00	28.3	497.309	22.5015	22.5017	22.5012	22.9126	22.5012	441173	1	0.441173	32.2462	22.5408	22.5408	22.3394
08/10 16:00:00	26.5125	199.608	22.5014	22.5011	22.5011	22.5841	22.5012	422431	1	0.422431	24.5047	22.5408	22.5093	22.1178
08/10 17:00:00	23.4833	94.0484	22.5011	22.501	22.5009	22.5009	22.5009	438865	1	0.438865	19.3643	22.5093	22.5011	21.8721
08/10 18:00:00	21.6042	40.9038	22.5005	22.5006	22.5006	22.5005	22.5006	335182	0.5	0.335182	16.4222	22.5011	22.5005	22.0053
08/10 19:00:00	20.1792	23.3998	22.5002	22.5006	22.5006	22.5006	22.5006	246878	0	0.246878	14.6472	22.5005	22.5003	22.1501
08/10 20:00:00	19.725	0	23.7083	23.8801	24.0248	23.8471	23.883	7.478	0	7.478e-06	13.725	22.5003	23.7662	22.6949
08/10 21:00:00	20.5958	0	24.0528	24.1696	24.3366	24.1063	24.1517	3.51753	0	3.51753e-06	14.5958	23.7662	24.0911	23.9752
08/10 22:00:00	20.8292	0	24.0878	24.2024	24.3638	24.121	24.1735	2.19914	0	2.19914e-06	14.8292	24.0911	24.1227	24.3041
08/10 23:00:00	19.95	0	24.1087	24.1117	24.261	24.0196	24.0742	2.19932	0	2.19932e-06	13.95	24.1227	24.1072	24.3051
08/10 24:00:00	19.1292	0	24.1187	23.9957	24.1332	23.8957	23.9501	2.19944	0	2.19944e-06	13.1292	24.1072	24.0767	24.2617
08/11 01:00:00	18.575	0	24.3065	24.0122	24.1361	23.9051	23.9578	2.19913	0	2.19913e-06	12.575	24.0767	24.2101	24.2126
08/11 02:00:00	18.0292	0	24.4052	23.9615	24.0735	23.8496	23.9001	2.19901	0	2.19901e-06	12.0292	24.2101	24.2615	24.3256
08/11 03:00:00	17.475	0	24.4381	23.8769	23.9776	23.762	23.8106	2.19883	0	2.19883e-06	11.475	24.2615	24.2573	24.3574
08/11 04:00:00	16.9292	0	24.4611	23.7817	23.8717	23.6647	23.7104	2.19844	0	2.19844e-06	10.9292	24.2573	24.2429	24.3345
08/11 05:00:00	16.375	1.22164	24.4805	23.6945	23.7867	23.5779	23.6187	3.51785	0	3.51785e-06	10.3994	24.2429	24.2296	24.3022
08/11 06:00:00	16.1	51.7364	24.6089	23.819	24.7647	23.8457	23.7433	3.07757	0	3.07757e-06	11.1347	24.2296	24.4195	24.3143
08/11 07:00:00	18.2125	203.857	24.7093	24.2154	26.0145	24.3154	24.1522	4.83801	0	4.83801e-06	16.2896	24.4195	24.6673	24.6785
08/11 08:00:00	22.1125	403.51	25.0398	25.3098	27.93	25.3093	25.2123	6.59581	0.1	6.59581e-06	24.1827	24.6673	25.2673	25.1938
08/11 09:00:00	24.1708	542.286	22.6684	22.6081	22.9957	22.6138	22.564	334748	0.3	0.334748	29.0165	25.2673	22.6702	25.1703
08/11 10:00:00	25.6458	698.487	22.5006	22.5007	22.5005	22.5007	22.5007	291694	0.3	0.291694	33.6156	22.6702	22.5006	22.8633
08/11 11:00:00	26.7	700.734	22.5003	22.5002	22.5002	22.5002	22.5002	280859	0	0.280859	34.7147	22.5006	22.5003	22.7588
08/11 12:00:00	24.2625	570.637	22.5001	22.5	22.5	22.5	22.5001	274658	0	0.274658	29.6752	22.5003	22.5001	22.6002
08/11 13:00:00	24.0417	235.355	22.5003	22.5004	22.5005	22.5004	22.5005	278605	0.3	0.278605	22.7488	22.5001	22.5003	22.3533
08/11 14:00:00	23.7583	266.345	22.5004	22.5005	22.5005	22.5005	22.5005	267947	0.3	0.267947	23.0852	22.5003	22.5004	22.39
08/11 15:00:00	22.525	462.54	22.5004	22.5004	22.5005	22.5005	22.5005	257626	0.3	0.257626	25.7758	22.5004	22.5004	22.5064
08/11 16:00:00	23.6667	475.166	22.5004	22.5005	22.5005	22.5005	22.5006	266123	0.2	0.266123	27.17	22.5004	22.5004	22.5343
08/11 17:00:00	25.05	343.036	22.5003	22.5005	22.5004	22.5004	22.5005	261726	0.2	0.261726	25.9107	22.5004	22.5004	22.5015
08/11 18:00:00	24.95	166.754	22.5003	22.5004	22.5004	22.5004	22.5004	252227	0.1	0.252227	22.2851	22.5004	22.5003	22.3993
08/11 19:00:00	23.2083	36.3304	22.5001	22.5006	22.5006	22.5006	22.5007	248491	0	0.248491	17.9349	22.5003	22.5003	22.2589
08/11 20:00:00	21.0083	0	23.4825	23.7604	23.9785	23.779	24.2393	3.07806	0	3.07806e-06	15.0083	22.5003	23.6094	22.7389
08/11 21:00:00	19.4042	0	23.9052	23.914	24.167	23.886	24.3534	3.959	0	3.959e-06	13.4042	23.6094	23.9449	23.7794
08/11 22:00:00	18.3042	0	23.9954	23.8357	24.0791	23.784	24.2346	2.19884	0	2.19884e-06	12.3042	23.9449	23.9785	24.0732
08/11 23:00:00	17.8	0	24.0478	23.774	24.0047	23.7094	24.1484	2.19861	0	2.19861e-06	11.8	23.9785	23.9925	24.089
08/11 24:00:00	18.0708	0	24.0906	23.7641	23.9828	23.6903	24.1187	2.19827	0	2.19827e-06	12.0708	23.9925	24.0165	24.1122
08/12 01:00:00	17.7042	0	24.1288	23.7254	23.9314	23.6453	24.0597	1.7584	0	1.7584e-06	11.7042	24.0165	24.0286	24.1233
08/12 02:00:00	17.2	0	24.1622	23.648	23.8411	23.5636	23.9609	1.75953	0	1.75953e-06	11.2	24.0286	24.0257	24.118
08/12 03:00:00	17.2	0	24.1919	23.6068	23.7871	23.5182	23.9001	1.75944	0	1.75944e-06	11.2	24.0257	24.0315	24.1151
08/12 04:00:00	16.6042	0	24.2192	23.5371	23.706	23.4468	23.8099	1.75801	0	1.75801e-06	10.6042	24.0315	24.027	24.1003
08/12 05:00:00	16.425	0	24.2435	23.4584	23.6151	23.3667	23.7128	3.07863	0	3.07863e-06	10.425	24.027	24.0179	24.0898
08/12 06:00:00	16.375	41.862	24.269	23.5138	23.9357	23.4545	23.753	1.75781	0	1.75781e-06	11.2122	24.0179	24.07	24.1078
08/12 07:00:00	18.2125	168.65	24.3215	23.9523	24.9299	23.9604	24.1802	1.75894	0	1.75894e-06	15.5855	24.07	24.2784	24.3092
08/12 08:00:00	21.7875	346.075	24.4505	24.8237	26.1288	24.7561	25.0107	1.7596	0.1	1.7596e-06	22.709	24.2784	24.644	24.7592
08/12 09:00:00	24.2208	530.52	22.5851	22.5796	22.6507	22.5751	22.5546	290028	0.3	0.290028	28.8312	24.644	22.5857	24.6527
08/12 10:00:00	25.5958	684.183	22.5005	22.5015	22.5013	22.5014	22.5014	259147	0.3	0.259147	33.2795	22.5857	22.5008	22.8443
08/12 11:00:00	26.6958	765.53	22.5003	22.5009	22.5008	22.5009	22.5009	253178	0	0.253178	36.0064	22.5008	22.5005	22.8678
08/12 12:00:00	26.9292	776.345	22.5001	22.5007	22.5007	22.5007	22.5007	249795	0	0.249795	36.4561	22.5005	22.5003	22.8908
08/12 13:00:00	27.5667	734.596	22.5002	22.5009	22.501	22.5009	22.5009	254899	0.3	0.254899	36.2586	22.5003	22.5004	22.872
08/12 14:00:00	24.725	539.083	22.5003	22.501	22.501	22.501	22.501	260698	0.3	0.260698	29.5067	22.5004	22.5005	22.6271
08/12 15:00:00	21.1042	414.14	22.5003	22.5011	22.5012	22.5011	22.5012	248871	0.3	0.248871	23.387	22.5005	22.5005	22.445
08/12 16:00:00	20.8708	356.728	22.5003	22.5012	22.5011	22.5011	22.5012	245924	0.2	0.245924	22.0054	22.5005	22.5005	22.4046
08/12 17:00:00	20.5042	213.822	22.5003	22.5012	22.5013	22.5012	22.5013	241823	0.2	0.241823	18.7806	22.5005	22.5006	22.3037
08/12 18:00:00	20	84.6008	22.5002	22.5008	22.5008	22.5008	22.5008	219619	0.1	0.219619	15.692	22.5006	22.5004	22.2497
08/12 19:00:00	20.325	27.2203	22.5002	22.5006	22.5007	22.5007	22.5007	213872	0	0.213872	14.8694	22.5004	22.5003	22.2347
08/12 20:00:00	19.6792	0	23.3515	23.6496	23.8207	23.6352	23.7298	1.75786	0	1.75786e-06	13.6792	22.5003	23.4558	22.6934
08/12 21:00:00	18.575	0	23.7385	23.8009	23.9954	23.7588	23.8654	3.07882	0	3.07882e-06	12.575	23.4558	23.7684	23.5993
08/12 22:00:00	18.0292	0	23.8266	23.7585	23.9435	23.7004	23.81	1.75781	0	1.75781e-06	12.0292	23.7684	23.8138	23.8894
08/12 23:00:00	17.2042	0	23.8794	23.6734	23.8447	23.6034	23.7139	1.75907	0	1.75907e-06	11.2042	23.8138	23.8218	23.9059
08/12 24:00:00	16.7	0	23.9209	23.5816	23.7391	23.5028	23.6121	1.75961	0	1.75961e-06	10.7	23.8218	23.8202	23.8966
08/13 01:00:00	16.7	0	23.7867	23.4091	23.5551	23.3236	23.4327	2.19861	0	2.19861e-06	10.7	23.8202	23.6726	23.895
08/13 02:00:00	16.1042	0	23.711	23.2587	23.3928	23.168	23.2744	2.19829	0	2.19829e-06	10.1042	23.6726	23.5724	23.7288
08/13 03:00:00	15.8708	0	23.6941	23.1421	23.264	23.0471	23.15	2.19795	0	2.19795e-06	9.87083	23.5724	23.5235	23.6218
08/13 04:00:00	15.8292	0	23.6868	23.0732	23.1849	22.9757	23.0745	2.1979	0	2.1979e-06	9.82917	23.5235	23.4961	23.572
08/13 05:00:00	15.275	0	23.6824	22.9633	23.0634	22.8633	22.958	3.51846	0	3.51846e-06	9.275	23.4961	23.4581	23.526
08/13 06:00:00	15.5958	49.7566	23.6888	23.0139	23.8151	23.0061	23.0032	3.07707	0	3.07707e-06	10.591	23.4581	23.5268	23.5335
08/13 07:00:00	17.2917	193.044	23.73	23.3918	24.8712	23.4639	23.3871	8.35426	0	8.35426e-06	15.1525	23.5268	23.718	23.7577
08/13 08:00:00	20.1417	383.262	25.416	25.6237	27.3054	25.5889	25.54	34459.8	1	0.0344598	21.8069	23.718	25.568	24.0943
08/13 09:00:00	22.8917	568.41	22.8537	22.6619	23.0972	22.6741	22.5829	429908	1	0.429908	28.2599	25.568	22.8166	25.2192
08/13 10:00:00	24.4958	725.467	22.5019	22.5016	22.6275	22.5016	22.5016	400794	1	0.400794	33.0052	22.8166	22.509	22.7321
08/13 11:00:00	25.9208	833.598	22.5013	22.5011	22.5011	22.5011	22.5011	372298	0.8	0.372298	36.5928	22.509	22.5012	22.6179
08/13 12:00:00	26.9708	865.049	22.5007	22.5005	22.5005	22.5005	22.5005	326356	0.4	0.326356	38.2718	22.5012	22.5006	22.775
08/13 13:00:00	27.7958	777.272	22.5014	22.5014	22.5014	22.5014	22.5014	405917	0.8	0.405917	37.3413	22.5006	22.5014	22.5567
08/13 14:00:00	27.7042	721.871	22.5018	22.5137	22.5017	22.5864	22.5017	467455	1	0.467455	36.1416	22.5014	22.511	22.3726
08/13 15:00:00	27.2	553.807	22.5016	22.5014	22.5014	22.593	22.5015	453143	1	0.453143	32.2761	22.511	22.5103	22.283
08/13 16:00:00	27.525	461.667	22.5016	22.5014	22.5014	22.5582	22.5014	451657	1	0.451657	30.7583	22.5103	22.5069	22.2338
08/13 17:00:00	26.8792	285.513	22.5015	22.5013	22.5013	22.5031	22.5013	436206	1	0.436206	26.5894	22.5069	22.5016	22.1236
08/13 18:00:00	25.8292	70.7632	22.5005	22.5004	22.5004	22.5004	22.5004	314852	0.5	0.314852	21.2444	22.5016	22.5005	22.2186
08/13 19:00:00	22.2417	15.3311	22.5	22.5005	22.5005	22.5005	22.5005	257923	0	0.257923	16.5483	22.5005	22.5002	22.1895
08/13 20:00:00	19.725	0	23.6408	23.9159	24.0768	23.8186	23.951	7.47545	0	7.47545e-06	13.725	22.5002	23.727	22.6948
08/13 21:00:00	20	0	23.9676	24.1723	24.3558	24.0307	24.1985	3.51626	0	3.51626e-06	14	23.727	24.0288	23.916
08/13 22:00:00	20.5958	0	23.9971	24.202	24.3791	24.0416	24.2228	2.19845	0	2.19845e-06	14.5958	24.0288	24.0559	24.2345
08/13 23:00:00	21.1	0	24.0177	24.2326	24.4005	24.0588	24.2484	2.19863	0	2.19863e-06	15.1	24.0559	24.0774	24.2786
08/13 24:00:00	21.1	0	24.0307	24.208	24.3643	24.0274	24.219	2.19874	0	2.19874e-06	15.1	24.0774	24.0773	24.2999
08/14 01:00:00	21.1	0	24.0382	24.1809	24.3258	23.9959	24.1869	2.19857	0	2.19857e-06	15.1	24.0773	24.0729	24.2998
08/14 02:00:00	21.1	0	24.0431	24.1479	24.282	23.9605	24.1492	2.19849	0	2.19849e-06	15.1	24.0729	24.065	24.2954
08/14 03:00:00	21.1	0	24.0464	24.1132	24.2371	23.9248	24.1099	2.19817	0	2.19817e-06	15.1	24.065	24.0558	24.2876
08/14 04:00:00	20.5042	0	24.0486	24.0442	24.1576	23.8563	24.0361	2.19784	0	2.19784e-06	14.5042	24.0558	24.0353	24.258
08/14 05:00:00	19.675	0	24.0502	23.9374	24.0404	23.7513	23.9243	3.51721	0	3.51721e-06	13.675	24.0353	24.003	24.2094
08/14 06:00:00	19.4	30.8068	24.0508	23.9381	24.0871	23.7694	23.9235	3.07673	0	3.07673e-06	14.0161	24.003	24.0079	24.1892
08/14 07:00:00	20.3208	89.9139	24.0671	24.1924	24.4097	24.0299	24.1832	8.3533	0	8.3533e-06	16.1191	24.0079	24.1019	24.2661
08/14 08:00:00	21.1	174.746	25.5942	25.949	26.1971	25.8048	25.7875	117534	1	0.117534	18.5949	24.1019	25.6941	24.1693
08/14 09:00:00	21.6958	243.538	23.022	22.6613	22.6325	22.6731	22.5811	494361	1	0.494361	20.5666	25.6941	22.9064	24.9294
08/14 10:00:00	23.7167	345.205	22.6061	22.5119	22.5018	22.5019	22.5019	498041	1	0.498041	24.6208	22.9064	22.5751	22.3063
08/14 11:00:00	25.325	444.327	22.5016	22.5013	22.5013	22.5013	22.5013	433080	0.8	0.43308	28.2115	22.5751	22.5015	22.2539
08/14 12:00:00	25.6	346.329	22.5007	22.5006	22.5007	22.5006	22.5006	357081	0.4	0.357081	26.5266	22.5015	22.5006	22.3009
08/14 13:00:00	24.6792	339.072	22.5015	22.5016	22.5016	22.5016	22.5016	395665	0.8	0.395665	25.4606	22.5006	22.5015	22.1734
08/14 14:00:00	23.575	357.029	22.5016	22.5013	22.5013	22.5868	22.5013	427166	1	0.427166	24.7156	22.5015	22.5097	22.0752
08/14 15:00:00	21.5125	189.514	22.5013	22.5012	22.5012	22.5022	22.5013	444684	1	0.444684	19.3028	22.5097	22.5014	21.8568
08/14 16:00:00	19.675	222.576	22.5014	22.5013	22.5013	22.5013	22.5013	406800	1	0.4068	18.1265	22.5014	22.5014	21.8968
08/14 17:00:00	20.05	146.134	22.5014	22.5013	22.5013	22.5013	22.5013	435588	1	0.435588	16.9727	22.5014	22.5014	21.79
08/14 18:00:00	20.275	49.6483	22.5006	22.5006	22.5006	22.5006	22.5006	318000	0.5	0.318	15.268	22.5014	22.5006	22.0062
08/14 19:00:00	20	12.979	22.5002	22.5007	22.5007	22.5007	22.5007	256905	0	0.256905	14.2596	22.5006	22.5003	22.1135
08/14 20:00:00	20	0	23.6927	23.819	23.8563	23.7791	23.868	7.47443	0	7.47443e-06	14	22.5003	23.7325	22.7044
08/14 21:00:00	19.675	0	24.0278	24.0125	24.0525	23.9579	24.0595	3.51677	0	3.51677e-06	13.675	23.7325	24.0229	23.9104
08/14 22:00:00	19.4	0	24.0553	23.9747	24.0121	23.9145	24.0146	2.19817	0	2.19817e-06	13.4	24.0229	24.0293	24.1877
08/14 23:00:00	18.5333	0	24.0701	23.8755	23.9078	23.8119	23.9069	2.19843	0	2.19843e-06	12.5333	24.0293	24.0081	24.1643
08/14 24:00:00	17.475	0	24.0753	23.7163	23.7425	23.6509	23.7387	2.19854	0	2.19854e-06	11.475	24.0081	23.9619	24.1071
08/15 01:00:00	17.2	0	24.0741	23.6074	23.6279	23.5409	23.6221	2.19861	0	2.19861e-06	11.2	23.9619	23.9269	24.0521
08/15 02:00:00	17.2	0	24.0686	23.5334	23.5496	23.4668	23.5416	2.19855	0	2.19855e-06	11.2	23.9269	23.8997	24.0174
08/15 03:00:00	17.2	0	24.0611	23.4774	23.4901	23.4113	23.4801	2.19845	0	2.19845e-06	11.2	23.8997	23.8769	23.9907
08/15 04:00:00	16.9292	0	24.0525	23.4043	23.4129	23.3387	23.4018	2.19819	0	2.19819e-06	10.9292	23.8769	23.8481	23.9588
08/15 05:00:00	17.2958	0	24.044	23.3549	23.3602	23.2902	23.3482	3.51644	0	3.51644e-06	11.2958	23.8481	23.8267	23.9429
08/15 06:00:00	18.0708	26.2498	24.038	23.4425	23.4981	23.3872	23.4356	3.0769	0	3.0769e-06	12.5958	23.8267	23.8531	23.9663
08/15 07:00:00	18.8958	80.777	24.0537	23.6673	24.0473	23.619	23.6601	8.35347	0	8.35347e-06	14.5114	23.8531	23.9522	24.0581
08/15 08:00:00	20.05	216.438	25.6892	25.7402	26.3995	25.672	25.6463	93806.3	1	0.0938063	18.3788	23.9522	25.7308	24.0694
08/15 09:00:00	21.4667	387.198	23.0864	22.6753	22.6402	22.6822	22.5776	500620	1	0.50062	23.2106	25.7308	22.9535	25.0417
08/15 10:00:00	23.1208	407.254	22.6517	22.502	22.502	22.502	22.502	514686	1	0.514686	25.2659	22.9535	22.6058	22.3361
08/15 11:00:00	23.9	524.228	22.5019	22.5015	22.5014	22.5014	22.5014	410179	0.8	0.410179	28.3846	22.6058	22.5018	22.3437
08/15 12:00:00	24.1708	445.797	22.5007	22.5006	22.5007	22.5006	22.5006	336230	0.4	0.33623	27.0868	22.5018	22.5007	22.3691
08/15 13:00:00	23.5333	322.354	22.5013	22.5013	22.5013	22.5013	22.5013	404609	0.8	0.404609	23.9804	22.5007	22.5013	22.1018
08/15 14:00:00	22.8	426.49	22.5018	22.5013	22.5013	22.5239	22.5013	510293	1	0.510293	25.3298	22.5013	22.5038	21.9019
08/15 15:00:00	22.8	332.198	22.5173	22.5016	22.5015	22.6469	22.5016	550184	1	0.550184	23.444	22.5038	22.5264	21.7465
08/15 16:00:00	23.0708	254.826	22.5421	22.5014	22.5014	22.5287	22.5014	553254	1	0.553254	22.1674	22.5264	22.5322	21.7179
08/15 17:00:00	22.4333	240.454	22.512	22.5018	22.5018	22.5018	22.5018	509018	1	0.509018	21.2424	22.5322	22.5089	21.7953
08/15 18:00:00	21.1042	98.5209	22.5007	22.5006	22.5006	22.5006	22.5006	318971	0.5	0.318971	17.0746	22.5089	22.5006	22.0732
08/15 19:00:00	20.275	13.8666	22.5002	22.5005	22.5005	22.5005	22.5005	236785	0	0.236785	14.5523	22.5006	22.5003	22.1706
08/15 20:00:00	20	0	23.6993	23.8198	23.8684	23.8224	23.8907	7.47398	0	7.47398e-06	14	22.5003	23.7433	22.7043
08/15 21:00:00	19.675	0	24.0346	24.0089	24.0589	23.9999	24.0753	3.51757	0	3.51757e-06	13.675	23.7433	24.0325	23.921
08/15 22:00:00	19.1292	0	24.061	23.9413	23.9851	23.9226	23.9994	2.1979	0	2.1979e-06	13.1292	24.0325	24.0284	24.188
08/15 23:00:00	18.575	0	24.0738	23.8304	23.8661	23.8042	23.8804	2.19815	0	2.19815e-06	12.575	24.0284	24.0017	24.1649
08/15 24:00:00	17.7042	0	24.0777	23.7007	23.7281	23.6687	23.7427	2.1984	0	2.1984e-06	11.7042	24.0017	23.9632	24.1087
08/16 01:00:00	16.6042	0	24.0752	23.556	23.575	23.5192	23.5895	2.19853	0	2.19853e-06	10.6042	23.9632	23.9157	24.0329
08/16 02:00:00	15.5042	0	24.0664	23.3843	23.3946	23.3433	23.4085	2.19864	0	2.19864e-06	9.50417	23.9157	23.8556	23.9483
08/16 03:00:00	15	0	24.052	23.2335	23.2363	23.191	23.2503	2.19858	0	2.19858e-06	9	23.8556	23.7984	23.8716
08/16 04:00:00	15	0	24.0358	23.1443	23.1405	23.0997	23.1552	2.19848	0	2.19848e-06	9	23.7984	23.7589	23.8151
08/16 05:00:00	15	0	24.0224	23.0764	23.068	23.0305	23.0813	3.51621	0	3.51621e-06	9	23.7589	23.7281	23.7762
08/16 06:00:00	15.325	33.7309	24.0131	23.1172	23.3201	23.1086	23.12	3.07731	0	3.07731e-06	9.99962	23.7281	23.7497	23.78
08/16 07:00:00	16.7917	93.3038	24.03	23.4001	23.9425	23.3913	23.4013	8.3534	0	8.3534e-06	12.6577	23.7497	23.8675	23.8925
08/16 08:00:00	18.3958	205.797	25.6882	25.6255	26.2289	25.5851	25.5699	40097.1	1	0.0400971	16.5118	23.8675	25.6966	24.0472
08/16 09:00:00	19.8208	313.723	23.0165	22.6432	22.6207	22.6534	22.573	351995	1	0.351995	20.0953	25.6966	22.8979	25.2483
08/16 10:00:00	21.1958	524.699	22.5451	22.5015	22.5015	22.5015	22.5015	357998	1	0.357998	25.6898	22.8979	22.5317	22.6616
08/16 11:00:00	21.9708	645.94	22.5014	22.501	22.5009	22.501	22.501	326615	0.8	0.326615	28.8896	22.5317	22.5013	22.4829
08/16 12:00:00	21.9292	702.318	22.5007	22.5004	22.5004	22.5004	22.5004	265484	0.4	0.265484	29.9755	22.5013	22.5006	22.6329
08/16 13:00:00	22.5667	751.602	22.5014	22.5011	22.5011	22.5011	22.5011	330214	0.8	0.330214	31.5987	22.5006	22.5013	22.5367
08/16 14:00:00	23.0292	704.908	22.5017	22.5014	22.5014	22.5014	22.5014	413998	1	0.413998	31.1273	22.5013	22.5016	22.3255
08/16 15:00:00	23.0708	648.477	22.5016	22.5013	22.5013	22.5013	22.5014	420986	1	0.420986	30.0404	22.5016	22.5015	22.2722
08/16 16:00:00	23.0292	502.74	22.5015	22.5012	22.5012	22.5012	22.5012	394909	1	0.394909	27.084	22.5015	22.5015	22.2317
08/16 17:00:00	22.475	331.321	22.5014	22.5011	22.5011	22.5011	22.5011	369886	1	0.369886	23.1014	22.5015	22.5013	22.1536
08/16 18:00:00	21.6042	151.18	22.5005	22.5003	22.5003	22.5003	22.5002	276602	0.5	0.276602	18.6278	22.5013	22.5005	22.218
08/16 19:00:00	20.8292	27.5108	22.5001	22.5002	22.5002	22.5002	22.5002	221298	0	0.221298	15.3794	22.5005	22.5001	22.2349
08/16 20:00:00	19.95	0	23.6974	23.8469	23.814	23.8041	24.2748	7.47284	0	7.47284e-06	13.95	22.5001	23.7617	22.7025
08/16 21:00:00	18.8042	0	24.0323	23.9757	23.9166	23.8871	24.3913	3.51841	0	3.51841e-06	12.8042	23.7617	24.0269	23.9093
08/16 22:00:00	18.0292	0	24.0555	23.8773	23.8032	23.7659	24.2616	2.19783	0	2.19783e-06	12.0292	24.0269	24.0081	24.1447
08/16 23:00:00	16.2833	0	24.0663	23.7043	23.616	23.5785	24.064	2.1978	0	2.1978e-06	10.2833	24.0081	23.959	24.0663
08/16 24:00:00	14.4042	0	24.0653	23.4625	23.3631	23.3298	23.7993	2.1981	0	2.1981e-06	8.40417	23.959	23.8816	23.9534
08/17 01:00:00	14.1708	0	24.0544	23.3208	23.2136	23.1836	23.6361	2.19848	0	2.19848e-06	8.17083	23.8816	23.8286	23.8689
08/17 02:00:00	14.4	0	24.0407	23.2328	23.1197	23.0925	23.5284	2.1986	0	2.1986e-06	8.4	23.8286	23.7904	23.8244
08/17 03:00:00	13.8042	0	24.0271	23.1172	22.9983	22.9738	23.3913	2.19872	0	2.19872e-06	7.80417	23.7904	23.7436	23.7662
08/17 04:00:00	12.7042	0	24.0115	22.9492	22.8243	22.8041	23.2019	2.19867	0	2.19867e-06	6.70417	23.7436	23.6796	23.6824
08/17 05:00:00	12.2	0	23.9936	22.7994	22.6695	22.6536	23.0321	3.51643	0	3.51643e-06	6.2	23.6796	23.6199	23.6019
08/17 06:00:00	13.1208	34.9587	23.9781	22.835	22.9337	22.7287	23.0538	3.07797	0	3.07797e-06	7.82001	23.6199	23.6361	23.5984
08/17 07:00:00	15.6875	120.502	23.9979	23.2195	23.9349	23.1317	23.4245	8.35365	0	8.35365e-06	12.0975	23.6361	23.804	23.7611
08/17 08:00:00	18.3917	324.164	25.6723	25.5778	26.4408	25.421	25.6874	32495.1	1	0.0324951	18.8749	23.804	25.6842	24.0833
08/17 09:00:00	20.6458	483.973	23.0166	22.6521	22.6859	22.6538	22.5862	382676	1	0.382676	24.3253	25.6842	22.9033	25.3094
08/17 10:00:00	22.5667	655.487	22.54	22.5015	22.5014	22.5015	22.5015	430023	1	0.430023	29.6764	22.9033	22.5282	22.6354
08/17 11:00:00	23.625	739.781	22.5015	22.5012	22.5011	22.5011	22.5011	359004	0.8	0.359004	32.4206	22.5282	22.5014	22.5248
08/17 12:00:00	24.4958	816.239	22.5007	22.5004	22.5004	22.5004	22.5004	284268	0.4	0.284268	34.8206	22.5014	22.5006	22.7552
08/17 13:00:00	25.325	794.264	22.5015	22.5011	22.5011	22.5011	22.5011	323752	0.8	0.323752	35.2103	22.5006	22.5014	22.6756
08/17 14:00:00	25.275	747.71	22.5017	22.5325	22.5013	22.6628	22.5013	369654	1	0.369654	34.2292	22.5014	22.52	22.5355
08/17 15:00:00	24.675	637.681	22.5015	22.502	22.5011	22.6489	22.5012	379121	1	0.379121	31.4286	22.52	22.5156	22.4358
08/17 16:00:00	24.1292	479.32	22.5015	22.5011	22.5011	22.5369	22.5011	372701	1	0.372701	27.7156	22.5156	22.5048	22.3192
08/17 17:00:00	23.3042	291.604	22.5014	22.501	22.501	22.501	22.501	353454	1	0.353454	23.1362	22.5048	22.5013	22.1964
08/17 18:00:00	22.2042	124.383	22.5005	22.5002	22.5002	22.5002	22.5001	257477	0.5	0.257477	18.6918	22.5013	22.5004	22.2648
08/17 19:00:00	21.1042	25.9077	22.5001	22.5	22.5	22.5	22.5	210515	0	0.210515	15.6223	22.5004	22.5	22.2684
08/17 20:00:00	19.6792	0	23.6932	23.8683	23.8867	23.8136	24.1472	7.47345	0	7.47345e-06	13.6792	22.5	23.7587	22.6931
08/17 21:00:00	18.575	0	24.0302	23.9969	23.9991	23.9003	24.2705	3.51872	0	3.51872e-06	12.575	23.7587	24.0266	23.8984
08/17 22:00:00	18.0292	0	24.0555	23.9182	23.9051	23.7989	24.1701	2.1982	0	2.1982e-06	12.0292	24.0266	24.0157	24.1444
08/17 23:00:00	17.2042	0	24.0676	23.8018	23.7748	23.6675	24.0357	2.19789	0	2.19789e-06	11.2042	24.0157	23.9852	24.1054
08/17 24:00:00	16.9708	0	24.0707	23.6933	23.6543	23.5483	23.9104	2.19784	0	2.19784e-06	10.9708	23.9852	23.9515	24.0672
08/18 01:00:00	16.0083	0	24.2517	23.6843	23.6331	23.5325	23.8835	2.19831	0	2.19831e-06	10.0083	23.9515	24.0719	24.0009
08/18 02:00:00	14.4042	0	24.3425	23.5337	23.4713	23.3766	23.713	2.1986	0	2.1986e-06	8.40417	24.0719	24.0865	24.0649
08/18 03:00:00	13.575	0	24.3662	23.4028	23.3315	23.2437	23.5657	2.19876	0	2.19876e-06	7.575	24.0865	24.0612	24.0509
08/18 04:00:00	13.3	0	24.3806	23.2999	23.2211	23.1391	23.447	2.19886	0	2.19886e-06	7.3	24.0612	24.0382	24.0165
08/18 05:00:00	13.3	0	24.3926	23.223	23.138	23.0618	23.3559	3.51709	0	3.51709e-06	7.3	24.0382	24.0217	23.9937
08/18 06:00:00	13.8958	47.3834	24.5088	23.3555	24.0243	23.2837	23.4831	3.07882	0	3.07882e-06	8.8435	24.0217	24.1945	24.0304
08/18 07:00:00	16.5125	203.811	24.6065	23.7893	25.57	23.808	23.9176	4.83569	0	4.83569e-06	14.5887	24.1945	24.4677	24.3979
08/18 08:00:00	19.5458	396.43	24.9347	24.8823	27.503	24.7894	24.9523	6.59665	0.1	6.59665e-06	21.4744	24.4677	25.0642	24.9038
08/18 09:00:00	21.7917	551.326	22.649	22.5771	22.844	22.5716	22.5465	265224	0.3	0.265224	26.8182	25.0642	22.6401	25.0568
08/18 10:00:00	23.3958	684.744	22.5006	22.5005	22.5005	22.5005	22.5005	271708	0.3	0.271708	31.0907	22.6401	22.5005	22.7936
08/18 11:00:00	24.4958	802.085	22.5004	22.5003	22.5002	22.5003	22.5003	250177	0	0.250177	34.5375	22.5005	22.5003	22.8243
08/18 12:00:00	25	851.309	22.5002	22.5	22.5	22.5001	22.5001	239319	0	0.239319	36.0262	22.5003	22.5002	22.9004
08/18 13:00:00	25	838.38	22.5003	22.5003	22.5003	22.5003	22.5003	246984	0.3	0.246984	35.7676	22.5002	22.5003	22.8735
08/18 14:00:00	24.675	774.795	22.5004	22.5003	22.5003	22.5003	22.5003	237274	0.3	0.237274	34.1709	22.5003	22.5003	22.8416
08/18 15:00:00	24.4	680.482	22.5004	22.5003	22.5003	22.5003	22.5003	231210	0.3	0.23121	32.0096	22.5003	22.5004	22.7817
08/18 16:00:00	24.4	538.464	22.5004	22.5002	22.5002	22.5002	22.5002	227083	0.2	0.227083	29.1693	22.5004	22.5003	22.694
08/18 17:00:00	23.8042	354.468	22.5005	22.5006	22.5007	22.5006	22.5009	215741	0.2	0.215741	24.8935	22.5003	22.5006	22.5739
08/18 18:00:00	22.7042	161.766	22.5007	22.5006	22.5006	22.5006	22.5005	201944	0.1	0.201944	19.9395	22.5006	22.5007	22.4366
08/18 19:00:00	21.3333	26.4046	22.5002	22.4999	22.4999	22.4999	22.4998	190217	0	0.190217	15.8614	22.5007	22.5001	22.3243
08/18 20:00:00	19.95	0	23.447	23.7162	23.7667	23.5495	24.1868	3.07846	0	3.07846e-06	13.95	22.5001	23.5434	22.7025
08/18 21:00:00	18.8042	0	23.8602	23.9003	23.941	23.6564	24.3599	3.95592	0	3.95592e-06	12.8042	23.5434	23.8779	23.6937
08/18 22:00:00	18.3	0	23.947	23.8561	23.8839	23.5922	24.2841	2.19867	0	2.19867e-06	12.3	23.8779	23.9201	24.0068
08/18 23:00:00	17.1083	0	23.9973	23.7629	23.7782	23.4909	24.1644	2.19882	0	2.19882e-06	11.1083	23.9201	23.9234	24.0076
08/18 24:00:00	16.1	0	24.0351	23.6212	23.625	23.3484	23.9982	2.19884	0	2.19884e-06	10.1	23.9234	23.9041	23.9763
08/19 01:00:00	15.1792	0	24.066	23.5071	23.5008	23.2347	23.8588	1.75926	0	1.75926e-06	9.17917	23.9041	23.8886	23.9257
08/19 02:00:00	14.1292	0	24.0916	23.3564	23.3407	23.0864	23.6824	1.75793	0	1.75793e-06	8.12917	23.8886	23.8584	23.8744
08/19 03:00:00	13.9	0	24.1129	23.2549	23.229	22.9878	23.5583	1.75907	0	1.75907e-06	7.9	23.8584	23.8405	23.8368
08/19 04:00:00	13.575	0	24.1318	23.1596	23.1258	22.8959	23.44	1.75973	0	1.75973e-06	7.575	23.8405	23.823	23.8079
08/19 05:00:00	13.625	0	24.1488	23.0854	23.0444	22.8265	23.3457	3.07771	0	3.07771e-06	7.625	23.823	23.811	23.7923
08/19 06:00:00	14.1708	40.8266	24.1733	23.1593	23.7102	22.9705	23.4008	1.75967	0	1.75967e-06	8.98737	23.811	23.8902	23.8272
08/19 07:00:00	16.2417	177.635	24.2209	23.5579	24.8441	23.4418	23.7882	1.75866	0	1.75866e-06	13.7944	23.8902	24.0938	24.0702
08/19 08:00:00	19.3167	369.25	24.3474	24.3344	26.256	24.1149	24.4946	1.75816	0.1	1.75816e-06	20.7017	24.0938	24.4419	24.5081
08/19 09:00:00	21.7917	548.849	22.5728	22.541	22.6468	22.5358	22.5314	246017	0.3	0.246017	26.7686	24.4419	22.5681	24.4853
08/19 10:00:00	23.6667	659.277	22.5003	22.5011	22.501	22.5011	22.5011	239675	0.3	0.239675	30.8522	22.5681	22.5005	22.7892
08/19 11:00:00	24.725	752.253	22.5002	22.5006	22.5005	22.5006	22.5006	230530	0	0.23053	33.7701	22.5005	22.5003	22.8438
08/19 12:00:00	25.325	776.074	22.5001	22.5004	22.5004	22.5004	22.5004	229931	0	0.229931	34.8465	22.5003	22.5002	22.8819
08/19 13:00:00	25.6	654.816	22.5002	22.5006	22.5007	22.5006	22.5006	235008	0.3	0.235008	32.6963	22.5002	22.5003	22.7962
08/19 14:00:00	25.8708	602.105	22.5003	22.5007	22.5008	22.5007	22.5008	238625	0.3	0.238625	31.9129	22.5003	22.5005	22.7611
08/19 15:00:00	26.1	458.619	22.5004	22.5009	22.5009	22.5009	22.5009	243209	0.3	0.243209	29.2724	22.5005	22.5005	22.66
08/19 16:00:00	25.8292	338.198	22.5003	22.5009	22.5008	22.5008	22.5009	240329	0.2	0.240329	26.5931	22.5005	22.5005	22.5749
08/19 17:00:00	25.275	200.118	22.5003	22.5008	22.5008	22.5007	22.5008	236132	0.2	0.236132	23.2774	22.5005	22.5004	22.471
08/19 18:00:00	24.675	89.6296	22.5002	22.5007	22.5007	22.5007	22.5008	233062	0.1	0.233062	20.4676	22.5004	22.5004	22.3818
08/19 19:00:00	24.1292	18.9103	22.5001	22.5006	22.5006	22.5006	22.5006	228498	0	0.228498	18.5074	22.5004	22.5003	22.3252
08/19 20:00:00	23.9	0	23.3282	23.9204	24.0653	23.825	24.0407	1.75977	0	1.75977e-06	17.9	22.5003	23.5157	22.838
08/19 21:00:00	23.575	0	23.7084	24.304	24.4573	24.1647	24.3953	3.07776	0	3.07776e-06	17.575	23.5157	23.8915	23.8298
08/19 22:00:00	23.0292	0	23.7998	24.3349	24.482	24.1784	24.4111	1.75962	0	1.75962e-06	17.0292	23.8915	23.9615	24.1823
08/19 23:00:00	22.2042	0	23.858	24.2924	24.429	24.123	24.3564	1.75851	0	1.75851e-06	16.2042	23.9615	23.9863	24.2232
08/19 24:00:00	20.7792	0	23.9058	24.1691	24.302	23.9963	24.2316	1.7583	0	1.7583e-06	14.7792	23.9863	23.9811	24.1989
08/20 01:00:00	20	0	23.777	23.9227	24.0508	23.7524	23.9815	2.19918	0	2.19918e-06	14	23.9811	23.8161	24.167
08/20 02:00:00	20.5958	0	23.7088	23.8599	23.979	23.6907	23.9123	2.19935	0	2.19935e-06	14.5958	23.8161	23.7487	24.0244
08/20 03:00:00	21.1	0	23.7014	23.8602	23.9704	23.6904	23.9059	2.19938	0	2.19938e-06	15.1	23.7487	23.7427	23.9752
08/20 04:00:00	21.425	0	23.7049	23.8459	23.9475	23.6776	23.8855	2.19935	0	2.19935e-06	15.425	23.7427	23.7401	23.9804
08/20 05:00:00	21.7	0	23.7122	23.8427	23.9365	23.6764	23.8769	3.51753	0	3.51753e-06	15.7	23.7401	23.7436	23.9872
08/20 06:00:00	21.7	30.054	23.7225	23.8692	24.1243	23.7266	23.8995	3.07871	0	3.07871e-06	16.3011	23.7436	23.7702	24.0113
08/20 07:00:00	21.9708	105.876	23.7657	24.1325	25.0212	24.0127	24.1556	8.35623	0	8.35623e-06	18.0884	23.7702	23.9189	24.0988
08/20 08:00:00	22.525	177.752	25.3634	25.8945	26.6692	25.7682	25.7885	107920	1	0.10792	20.08	23.9189	25.5524	24.0619
08/20 09:00:00	23.6667	339.951	22.8907	22.7603	22.6787	22.739	22.593	534679	1	0.534679	24.4657	25.5524	22.8344	24.8289
08/20 10:00:00	25.3208	447.392	22.5019	22.5019	22.5018	22.5056	22.5019	483607	1	0.483607	28.2687	22.8344	22.5022	22.394
08/20 11:00:00	26.425	682.308	22.5013	22.5014	22.5013	22.5032	22.5014	448763	0.8	0.448763	34.0712	22.5022	22.5015	22.3461
08/20 12:00:00	27.2958	625.648	22.5007	22.5007	22.5007	22.5008	22.5007	375743	0.4	0.375743	33.8088	22.5015	22.5007	22.507
08/20 13:00:00	28.3958	709.859	22.5015	22.5016	22.5016	22.559	22.5015	440156	0.8	0.440156	36.593	22.5007	22.507	22.4512
08/20 14:00:00	28.3042	548.142	22.5018	22.5016	22.5017	22.8626	22.5017	474968	1	0.474968	33.267	22.507	22.5363	22.2621
08/20 15:00:00	28.3958	506.57	22.5016	22.5015	22.5015	22.9055	22.5015	478254	1	0.478254	32.5272	22.5363	22.5402	22.2579
08/20 16:00:00	27.9792	359.65	22.5015	22.5015	22.5014	22.7785	22.5014	473764	1	0.473764	29.1722	22.5402	22.528	22.1573
08/20 17:00:00	27.525	229.702	22.5015	22.5014	22.5014	22.5553	22.5014	454119	1	0.454119	26.119	22.528	22.5066	22.0865
08/20 18:00:00	26.8792	98.2394	22.5006	22.5005	22.5005	22.5005	22.5005	328916	0.5	0.328916	22.844	22.5066	22.5005	22.2455
08/20 19:00:00	24.5833	18.615	22.5001	22.5003	22.5003	22.5003	22.5003	242793	0	0.242793	18.9556	22.5005	22.5002	22.3074
08/20 20:00:00	22.7042	0	23.6549	24.0855	24.155	24.1123	24.2256	7.47583	0	7.47583e-06	16.7042	22.5002	23.8013	22.7969
08/20 21:00:00	21.0083	0	23.9859	24.2614	24.3306	24.2675	24.3846	3.51969	0	3.51969e-06	15.0083	23.8013	24.0819	24.024
08/20 22:00:00	19.675	0	24.0149	24.1415	24.2011	24.1314	24.2474	2.19899	0	2.19899e-06	13.675	24.0819	24.0622	24.2555
08/20 23:00:00	18.8042	0	24.0308	24.032	24.0798	24.0087	24.1253	2.19863	0	2.19863e-06	12.8042	24.0622	24.037	24.2061
08/20 24:00:00	18.625	0	24.0365	23.9408	23.9781	23.9066	24.0236	2.19847	0	2.19847e-06	12.625	24.037	24.0108	24.1751
08/21 01:00:00	18.3042	0	24.0378	23.8633	23.8915	23.8199	23.9362	2.19915	0	2.19915e-06	12.3042	24.0108	23.986	24.1382
08/21 02:00:00	17.475	0	24.0366	23.7297	23.75	23.6794	23.7924	2.19939	0	2.19939e-06	11.475	23.986	23.9426	24.0853
08/21 03:00:00	16.6042	0	24.0325	23.5868	23.5987	23.5316	23.6403	2.19962	0	2.19962e-06	10.6042	23.9426	23.8945	24.0125
08/21 04:00:00	16.1	0	24.0249	23.4553	23.4591	23.3959	23.4998	2.19972	0	2.19972e-06	10.1	23.8945	23.8476	23.9478
08/21 05:00:00	16.425	0	24.0165	23.395	23.3936	23.3327	23.4316	3.5187	0	3.5187e-06	10.425	23.8476	23.8222	23.9126
08/21 06:00:00	16.7	36.258	24.0141	23.4323	23.8898	23.4155	23.4635	3.08018	0	3.08018e-06	11.4252	23.8222	23.8624	23.9218
08/21 07:00:00	19.0833	164.41	24.0441	23.8299	24.8655	23.8597	23.863	8.35722	0	8.35722e-06	16.3715	23.8624	24.0427	24.131
08/21 08:00:00	22.0208	344.813	25.6091	25.9019	26.8837	25.8378	25.7454	122248	1	0.122248	22.9171	24.0427	25.74	24.248
08/21 09:00:00	24.3167	515.595	23.0041	22.665	22.9595	22.6806	22.5767	439625	1	0.439625	28.6286	25.74	22.9136	25.379
08/21 10:00:00	26.4667	662.734	22.5549	22.5015	22.5524	22.5015	22.5015	435859	1	0.435859	33.7213	22.9136	22.5415	22.7706
08/21 11:00:00	27.7958	776.06	22.5014	22.501	22.5009	22.501	22.501	403846	0.8	0.403846	37.317	22.5415	22.5013	22.601
08/21 12:00:00	28.625	840.571	22.5007	22.5004	22.5004	22.5004	22.5004	331107	0.4	0.331107	39.4364	22.5013	22.5006	22.8039
08/21 13:00:00	29.1708	801.902	22.5014	22.5943	22.5012	22.5012	22.5012	408369	0.8	0.408369	39.2089	22.5006	22.5103	22.615
08/21 14:00:00	30.05	580.463	22.5017	22.5918	22.5015	22.6572	22.5016	478744	1	0.478744	35.6593	22.5103	22.5252	22.3385
08/21 15:00:00	29.95	457.494	22.5015	22.5014	22.5013	22.6778	22.5014	471109	1	0.471109	33.0999	22.5252	22.5184	22.2833
08/21 16:00:00	29.1292	431.395	22.5015	22.5013	22.5013	22.6174	22.5013	460824	1	0.460824	31.7571	22.5184	22.5126	22.2546
08/21 17:00:00	28.3042	211.154	22.5014	22.5012	22.5012	22.5034	22.5012	448840	1	0.44884	26.5272	22.5126	22.5015	22.0976
08/21 18:00:00	27.475	90.1184	22.5005	22.5005	22.5005	22.5005	22.5005	345749	0.5	0.345749	23.2774	22.5015	22.5005	22.2161
08/21 19:00:00	26.6042	15.6437	22.5001	22.5006	22.5006	22.5006	22.5006	266706	0	0.266706	20.917	22.5005	22.5003	22.3187
08/21 20:00:00	25.5042	0	23.7098	24.3674	24.4469	24.2631	24.4597	7.47802	0	7.47802e-06	19.5042	22.5003	23.911	22.893
08/21 21:00:00	24.4042	0	24.0701	24.7438	24.825	24.5841	24.8033	3.51876	0	3.51876e-06	18.4042	23.911	24.2692	24.2488
08/21 22:00:00	24.1708	0	24.1152	24.763	24.8396	24.5849	24.8108	2.19968	0	2.19968e-06	18.1708	24.2692	24.3036	24.5946
08/21 23:00:00	24.1292	0	24.1448	24.7812	24.8508	24.5931	24.8203	2.19958	0	2.19958e-06	18.1292	24.3036	24.3279	24.6271
08/21 24:00:00	23.9	0	24.1637	24.7532	24.8172	24.5619	24.7878	2.19943	0	2.19943e-06	17.9	24.3279	24.3316	24.6433
08/22 01:00:00	23.3042	0	24.177	24.7018	24.7602	24.5084	24.731	2.19948	0	2.19948e-06	17.3042	24.3316	24.3242	24.6264
08/22 02:00:00	22.8	0	24.1866	24.626	24.6784	24.428	24.6492	2.19928	0	2.19928e-06	16.8	24.3242	24.3066	24.6019
08/22 03:00:00	23.0708	0	24.1942	24.6066	24.6527	24.407	24.624	2.19955	0	2.19955e-06	17.0708	24.3066	24.305	24.5937
08/22 04:00:00	23.0292	0	24.2015	24.5871	24.6272	24.3878	24.5989	2.19982	0	2.19982e-06	17.0292	24.305	24.3035	24.5908
08/22 05:00:00	22.8	0	24.2095	24.5403	24.5751	24.3406	24.5468	3.52088	0	3.52088e-06	16.8	24.3035	24.2941	24.5814
08/22 06:00:00	22.8	9.64449	24.2165	24.5268	24.5709	24.3299	24.5292	3.07998	0	3.07998e-06	16.9929	24.2941	24.2954	24.5787
08/22 07:00:00	22.475	51.41	24.2364	24.6292	24.784	24.4425	24.6313	8.3594	0	8.3594e-06	17.5032	24.2954	24.3478	24.5975
08/22 08:00:00	21.9292	107.864	25.7311	26.0188	26.1247	25.8803	25.8575	158196	1	0.158196	18.0865	24.3478	25.8028	24.2998
08/22 09:00:00	21.9708	218.807	23.4557	23.0417	22.7234	23.0477	22.6008	615737	1	0.615737	20.347	25.8028	23.2859	24.7458
08/22 10:00:00	22.7958	312.671	22.9917	22.9501	22.6405	22.8955	22.5032	608884	1	0.608884	23.0493	23.2859	22.9303	22.3684
08/22 11:00:00	23.625	334.158	22.517	22.6002	22.5016	22.5408	22.5017	522504	0.8	0.522504	24.3082	22.9303	22.5255	22.262
08/22 12:00:00	24.4958	410.489	22.5007	22.5007	22.5007	22.5017	22.5008	425468	0.4	0.425468	26.7056	22.5255	22.5008	22.171
08/22 13:00:00	25.325	376.915	22.5014	22.5017	22.5018	22.6406	22.5018	516112	0.8	0.516112	26.8633	22.5008	22.5148	21.9403
08/22 14:00:00	26.1958	394.509	22.5017	22.502	22.5019	22.7302	22.5019	570658	1	0.570658	28.086	22.5148	22.5236	21.8687
08/22 15:00:00	27.5667	553.282	22.5364	22.5089	22.5017	22.8423	22.5018	599374	1	0.599374	32.6323	22.5236	22.5591	21.9662
08/22 16:00:00	28.3	395.71	22.5708	22.5018	22.5018	22.7729	22.5018	611876	1	0.611876	30.2142	22.5591	22.5756	21.8891
08/22 17:00:00	28.625	263.95	22.5697	22.5018	22.5018	22.5707	22.5018	612461	1	0.612461	27.904	22.5756	22.5555	21.8249
08/22 18:00:00	28.3042	107.532	22.5009	22.501	22.501	22.501	22.5009	471812	0.5	0.471812	24.4548	22.5555	22.5009	22.0153
08/22 19:00:00	27.2042	17.498	22.5002	22.5016	22.5017	22.5016	22.5018	319179	0	0.319179	21.5541	22.5009	22.5007	22.2185
08/22 20:00:00	26.1042	0	23.778	24.3484	24.4185	24.3952	24.6993	7.48021	0	7.48021e-06	20.1042	22.5007	23.9813	22.9139
08/22 21:00:00	24.95	0	24.1577	24.7127	24.7789	24.7368	25.0578	3.5185	0	3.5185e-06	18.95	23.9813	24.3536	24.3369
08/22 22:00:00	24.4	0	24.2061	24.6965	24.7553	24.7079	25.0336	2.19995	0	2.19995e-06	18.4	24.3536	24.3801	24.6857
08/22 23:00:00	24.4	0	24.2363	24.6966	24.7479	24.698	25.0223	2.20013	0	2.20013e-06	18.4	24.3801	24.399	24.7119
08/22 24:00:00	23.5333	0	24.255	24.6336	24.6791	24.6299	24.9493	2.20015	0	2.20015e-06	17.5333	24.399	24.3913	24.7009
08/23 01:00:00	22.8	0	24.2667	24.5318	24.5716	24.5225	24.8405	2.20065	0	2.20065e-06	16.8	24.3913	24.367	24.6682
08/23 02:00:00	22.8	0	24.2748	24.493	24.5261	24.4785	24.7894	2.20044	0	2.20044e-06	16.8	24.367	24.3591	24.6441
08/23 03:00:00	22.8	0	24.2819	24.4617	24.4885	24.4425	24.7443	2.20019	0	2.20019e-06	16.8	24.3591	24.3529	24.6364
08/23 04:00:00	22.475	0	24.2882	24.414	24.4349	24.3919	24.6833	2.19984	0	2.19984e-06	16.475	24.3529	24.3413	24.619
08/23 05:00:00	21.9292	0	24.2946	24.3464	24.3613	24.32	24.598	3.52081	0	3.52081e-06	15.9292	24.3413	24.3232	24.5889
08/23 06:00:00	21.7	19.3278	24.3002	24.3492	24.3895	24.3257	24.5853	3.0796	0	3.0796e-06	16.0866	24.3232	24.3288	24.5764
08/23 07:00:00	21.7	61.6998	24.3191	24.4891	24.5857	24.4613	24.7148	8.36122	0	8.36122e-06	16.934	24.3288	24.387	24.611
08/23 08:00:00	21.7	153.534	25.7903	26.0411	26.1448	26.0278	26.041	167666	1	0.167666	18.7707	24.387	25.8718	24.3399
08/23 09:00:00	21.9708	197.886	23.3577	22.8118	22.6713	22.9094	22.6121	564497	1	0.564497	19.9286	25.8718	23.1803	24.9192
08/23 10:00:00	21.6042	174.882	22.8426	22.5019	22.5019	22.5054	22.5019	557259	1	0.557259	19.1018	23.1803	22.7386	22.2494
08/23 11:00:00	21.1	230.148	22.5213	22.5016	22.5016	22.5016	22.5016	503568	0.8	0.503568	19.703	22.7386	22.5153	21.9591
08/23 12:00:00	21.1	241.149	22.5007	22.5007	22.5007	22.5007	22.5007	376437	0.4	0.376437	19.923	22.5153	22.5007	22.043
08/23 13:00:00	21.1	359.433	22.5015	22.5014	22.5015	22.5015	22.5015	447032	0.8	0.447032	22.2887	22.5007	22.5015	21.9448
08/23 14:00:00	21.425	345.214	22.5332	22.5478	22.5014	22.6639	22.5014	516322	1	0.516322	22.3293	22.5015	22.5434	21.7851
08/23 15:00:00	21.7	303.564	22.5863	22.6371	22.5015	22.6903	22.5015	534898	1	0.534898	21.7713	22.5434	22.5914	21.764
08/23 16:00:00	21.1042	235.253	22.5314	22.5046	22.5015	22.5053	22.5015	484575	1	0.484575	19.8092	22.5914	22.5229	21.8617
08/23 17:00:00	20.6	138.108	22.5112	22.5013	22.5013	22.5013	22.5013	437921	1	0.437921	17.3622	22.5229	22.5082	21.8191
08/23 18:00:00	20.6	74.8449	22.5006	22.5006	22.5006	22.5006	22.5006	316973	0.5	0.316973	16.0969	22.5082	22.5006	22.0437
08/23 19:00:00	20.275	15.5309	22.5002	22.5005	22.5005	22.5005	22.5005	239928	0	0.239928	14.5856	22.5006	22.5003	22.1644
08/23 20:00:00	20	0	23.7697	23.9026	23.8775	23.8512	24.0048	7.48105	0	7.48105e-06	14	22.5003	23.8099	22.7043
08/23 21:00:00	20	0	24.1292	24.1323	24.0972	24.0656	24.2374	3.52116	0	3.52116e-06	14	23.8099	24.1278	23.9979
08/23 22:00:00	20.325	0	24.1649	24.1451	24.1068	24.0738	24.2442	2.19991	0	2.19991e-06	14.325	24.1278	24.1555	24.323
08/23 23:00:00	20.8708	0	24.1857	24.1578	24.1178	24.085	24.2516	2.20015	0	2.20015e-06	14.8708	24.1555	24.1733	24.3691
08/23 24:00:00	21.1	0	24.1984	24.1489	24.1076	24.0761	24.2372	2.20036	0	2.20036e-06	15.1	24.1733	24.179	24.3945
08/24 01:00:00	20.8292	0	24.2063	24.0956	24.053	24.024	24.1776	2.20114	0	2.20114e-06	14.8292	24.179	24.1678	24.3909
08/24 02:00:00	20.275	0	24.2101	24.0047	23.961	23.9356	24.0799	2.20124	0	2.20124e-06	14.275	24.1678	24.1424	24.3608
08/24 03:00:00	20	0	24.2105	23.9277	23.8828	23.8608	23.9968	2.20126	0	2.20126e-06	14	24.1424	24.1189	24.3263
08/24 04:00:00	19.675	0	24.2088	23.8564	23.8107	23.7922	23.9194	2.20122	0	2.20122e-06	13.675	24.1189	24.0957	24.292
08/24 05:00:00	19.725	0	24.2067	23.8009	23.7541	23.7387	23.8586	3.52044	0	3.52044e-06	13.725	24.0957	24.0771	24.2708
08/24 06:00:00	20	19.4661	24.2045	23.8379	23.8015	23.7785	23.893	3.08125	0	3.08125e-06	14.3893	24.0771	24.0876	24.2752
08/24 07:00:00	20.325	77.213	24.2161	24.0484	24.104	23.9945	24.106	8.36338	0	8.36338e-06	15.8693	24.0876	24.1661	24.3363
08/24 08:00:00	20.6	159.483	25.7885	25.8637	25.9928	25.8064	25.8069	77614.3	1	0.0776143	17.7897	24.1661	25.8102	24.2984
08/24 09:00:00	20.8708	265.221	23.1334	22.6693	22.6165	22.6865	22.5814	458010	1	0.45801	20.1753	25.8102	22.9848	25.1156
08/24 10:00:00	21.425	331.094	22.6664	22.5015	22.5015	22.5016	22.5015	478234	1	0.478234	22.0469	22.9848	22.6159	22.3418
08/24 11:00:00	21.7	487.219	22.5029	22.5011	22.5011	22.5011	22.5011	433781	0.8	0.433781	25.4444	22.6159	22.5024	22.1977
08/24 12:00:00	21.9708	560.508	22.5007	22.5006	22.5006	22.5006	22.5006	341762	0.4	0.341762	27.181	22.5024	22.5007	22.36
08/24 13:00:00	22.525	636.746	22.5015	22.5014	22.5014	22.5013	22.5013	405803	0.8	0.405803	29.2599	22.5007	22.5014	22.28
08/24 14:00:00	22.475	559.015	22.5017	22.5014	22.5014	22.664	22.5015	458123	1	0.458123	27.6553	22.5014	22.5172	22.1036
08/24 15:00:00	22.2	491.443	22.5015	22.5014	22.5014	22.6558	22.5014	462371	1	0.462371	26.0289	22.5172	22.5162	22.0534
08/24 16:00:00	22.525	424.072	22.5015	22.5014	22.5013	22.5276	22.5014	459205	1	0.459205	25.0064	22.5162	22.504	22.0249
08/24 17:00:00	22.475	294.239	22.5015	22.5013	22.5013	22.5013	22.5013	439709	1	0.439709	22.3598	22.504	22.5014	21.9676
08/24 18:00:00	21.9292	120.466	22.5005	22.5004	22.5004	22.5004	22.5003	304950	0.5	0.30495	18.3385	22.5014	22.5005	22.1419
08/24 19:00:00	21.1042	17.3113	22.5001	22.5003	22.5003	22.5003	22.5003	235183	0	0.235183	15.4504	22.5005	22.5002	22.205
08/24 20:00:00	20.6	0	23.738	23.8687	23.886	23.9017	24.2103	7.48273	0	7.48273e-06	14.6	22.5002	23.8018	22.7248
08/24 21:00:00	20.275	0	24.09	24.092	24.0934	24.1049	24.4415	3.5218	0	3.5218e-06	14.275	23.8018	24.112	23.9993
08/24 22:00:00	19.675	0	24.1228	24.0406	24.0273	24.035	24.3689	2.20117	0	2.20117e-06	13.675	24.112	24.1152	24.2851
08/24 23:00:00	20.3208	0	24.1405	24.0348	24.0096	24.0151	24.3481	2.20098	0	2.20098e-06	14.3208	24.1152	24.1228	24.3104
08/24 24:00:00	20.5042	0	24.1514	24.036	24.0003	24.0046	24.3325	2.20075	0	2.20075e-06	14.5042	24.1228	24.128	24.3242
08/25 01:00:00	19.675	0	24.3428	24.0398	23.9926	24	24.3136	2.201	0	2.201e-06	13.675	24.128	24.2592	24.301
08/25 02:00:00	18.8042	0	24.4421	23.9774	23.921	23.9295	24.2323	2.20112	0	2.20112e-06	12.8042	24.2592	24.3066	24.4007
08/25 03:00:00	18.625	0	24.4746	23.9152	23.852	23.8622	24.1529	2.20145	0	2.20145e-06	12.625	24.3066	24.3082	24.4414
08/25 04:00:00	18.9	0	24.4994	23.9165	23.8487	23.8613	24.1388	2.20167	0	2.20167e-06	12.9	24.3082	24.3245	24.4524
08/25 05:00:00	17.9792	0	24.5225	23.8453	23.7722	23.7871	24.0524	3.52332	0	3.52332e-06	11.9792	24.3245	24.3172	24.4369
08/25 06:00:00	17.7958	34.0602	24.6415	23.9091	24.3594	23.8933	24.0995	3.08277	0	3.08277e-06	12.477	24.3172	24.4525	24.4468
08/25 07:00:00	18.8958	150.975	24.7423	24.3463	25.245	24.3715	24.5254	4.84305	0	4.84305e-06	15.9153	24.4525	24.6853	24.6982
08/25 08:00:00	20.3208	268.89	25.063	25.3989	26.3148	25.3159	25.5191	6.60412	0.1	6.60412e-06	19.6986	24.6853	25.2174	25.0579
08/25 09:00:00	21.6958	462.273	22.6664	22.6054	22.6427	22.6055	22.5721	301557	0.3	0.301557	24.9413	25.2174	22.6479	25.0589
08/25 10:00:00	22.7958	654.351	22.5006	22.5007	22.5005	22.5006	22.5006	283540	0.3	0.28354	29.8829	22.6479	22.5006	22.7324
08/25 11:00:00	23.625	739.984	22.5004	22.5003	22.5002	22.5003	22.5003	258532	0	0.258532	32.4247	22.5006	22.5003	22.7324
08/25 12:00:00	24.1708	804.313	22.5002	22.5001	22.5001	22.5001	22.5001	250144	0	0.250144	34.2571	22.5003	22.5002	22.8145
08/25 13:00:00	24.725	828.439	22.5003	22.5004	22.5004	22.5004	22.5004	262474	0.3	0.262474	35.2938	22.5002	22.5004	22.8211
08/25 14:00:00	24.675	733.11	22.5004	22.5003	22.5003	22.5003	22.5004	254073	0.3	0.254073	33.3372	22.5004	22.5004	22.7738
08/25 15:00:00	24.4	619.449	22.5004	22.5004	22.5004	22.5004	22.5004	249805	0.3	0.249805	30.789	22.5004	22.5004	22.6965
08/25 16:00:00	23.8042	462.914	22.5003	22.5003	22.5003	22.5003	22.5003	241995	0.2	0.241995	27.0624	22.5004	22.5003	22.587
08/25 17:00:00	23.0292	285.4	22.5003	22.5002	22.5002	22.5002	22.5002	236949	0.2	0.236949	22.7372	22.5003	22.5003	22.4504
08/25 18:00:00	22.2042	113.676	22.5002	22.5002	22.5002	22.5002	22.5002	224765	0.1	0.224765	18.4777	22.5003	22.5002	22.3328
08/25 19:00:00	21.1042	14.2083	22.5001	22.5003	22.5003	22.5002	22.5003	213580	0	0.21358	15.3883	22.5002	22.5002	22.253
08/25 20:00:00	20.275	0	23.4757	23.781	23.7154	23.604	24.0836	3.08146	0	3.08146e-06	14.275	22.5002	23.5659	22.7136
08/25 21:00:00	19.4042	0	23.901	24.0122	23.9136	23.7712	24.3088	3.96324	0	3.96324e-06	13.4042	23.5659	23.9234	23.7364
08/25 22:00:00	19.1708	0	23.9937	24.0011	23.8907	23.7441	24.2784	2.20124	0	2.20124e-06	13.1708	23.9234	23.981	24.0816
08/25 23:00:00	19.1292	0	24.0482	24.0078	23.8887	23.7429	24.2694	2.20141	0	2.20141e-06	13.1292	23.981	24.0186	24.137
08/25 24:00:00	18.3042	0	24.0925	23.9445	23.8188	23.6773	24.1882	2.2016	0	2.2016e-06	12.3042	24.0186	24.0284	24.1459
08/26 01:00:00	18.0708	0	24.1289	23.8638	23.7338	23.5981	24.0901	1.76244	0	1.76244e-06	12.0708	24.0284	24.0278	24.1476
08/26 02:00:00	17.7042	0	24.1615	23.8154	23.6822	23.5525	24.0253	1.76236	0	1.76236e-06	11.7042	24.0278	24.0348	24.1344
08/26 03:00:00	17.2	0	24.1905	23.7239	23.5878	23.465	23.9171	1.76098	0	1.76098e-06	11.2	24.0348	24.0261	24.124
08/26 04:00:00	17.2	0	24.2161	23.6587	23.5186	23.4026	23.8361	1.76154	0	1.76154e-06	11.2	24.0261	24.023	24.1155
08/26 05:00:00	18.1208	0	24.2403	23.6533	23.5125	23.4025	23.818	3.08337	0	3.08337e-06	12.1208	24.023	24.0379	24.144
08/26 06:00:00	18.9	22.097	24.266	23.7645	23.7026	23.5302	23.9193	1.76196	0	1.76196e-06	13.3419	24.0379	24.0953	24.2006
08/26 07:00:00	19.8208	86.3281	24.3071	24.0721	24.3405	23.8547	24.2195	1.76266	0	1.76266e-06	15.5474	24.0953	24.2382	24.3329
08/26 08:00:00	20.6	172.669	24.4292	24.672	25.1338	24.4329	24.7919	1.76204	0.1	1.76204e-06	18.0534	24.2382	24.5141	24.5599
08/26 09:00:00	21.1958	217.688	22.5792	22.5548	22.5603	22.5464	22.5379	239890	0.3	0.23989	19.5496	24.5141	22.5703	24.3234
08/26 10:00:00	21.9708	307.183	22.5004	22.5011	22.501	22.5011	22.5011	238760	0.3	0.23876	22.1145	22.5703	22.5006	22.494
08/26 11:00:00	22.525	346.596	22.5002	22.5008	22.5008	22.5009	22.5009	248157	0	0.248157	23.4569	22.5006	22.5004	22.4493
08/26 12:00:00	23.3958	330.991	22.5002	22.5011	22.5011	22.5011	22.5011	256750	0	0.25675	24.0156	22.5004	22.5005	22.4481
08/26 13:00:00	24.4958	331.85	22.5003	22.5016	22.5016	22.5016	22.5016	260740	0.3	0.26074	25.1328	22.5005	22.5007	22.4771
08/26 14:00:00	25.9208	334.386	22.5004	22.5018	22.5018	22.5018	22.5018	272479	0.3	0.272479	26.6086	22.5007	22.5008	22.5005
08/26 15:00:00	26.1042	255.792	22.5004	22.5017	22.5018	22.5017	22.5018	274570	0.3	0.27457	25.22	22.5008	22.5008	22.4482
08/26 16:00:00	25.275	207.774	22.5003	22.5017	22.5017	22.5017	22.5018	268173	0.2	0.268173	23.4305	22.5008	22.5007	22.4018
08/26 17:00:00	23.8083	78.0641	22.5002	22.5015	22.5015	22.5015	22.5015	266443	0.2	0.266443	19.3696	22.5007	22.5006	22.2665
08/26 18:00:00	23.0708	51.5442	22.5001	22.5015	22.5016	22.5015	22.5016	272398	0.1	0.272398	18.1017	22.5006	22.5006	22.209
08/26 19:00:00	22.7042	10.1791	22.5001	22.5014	22.5014	22.5014	22.5015	266770	0	0.26677	16.9077	22.5006	22.5005	22.1812
08/26 20:00:00	22.2	0	23.3357	23.7609	23.7244	23.627	23.8249	1.76139	0	1.76139e-06	16.2	22.5005	23.4547	22.78
08/26 21:00:00	22.2	0	23.7189	24.083	24.034	23.917	24.1414	3.08347	0	3.08347e-06	16.2	23.4547	23.815	23.7225
08/26 22:00:00	21.9292	0	23.8087	24.1286	24.0769	23.9607	24.1806	1.76184	0	1.76184e-06	15.9292	23.815	23.8906	24.0691
08/26 23:00:00	21.375	0	23.8651	24.1008	24.0462	23.933	24.1489	1.76262	0	1.76262e-06	15.375	23.8906	23.9208	24.1248
08/26 24:00:00	21.1	0	23.9114	24.0561	23.9989	23.8904	24.1004	1.76217	0	1.76217e-06	15.1	23.9208	23.9391	24.1452
08/27 01:00:00	20.5042	0	23.782	23.8637	23.8081	23.7054	23.9044	2.20267	0	2.20267e-06	14.5042	23.9391	23.791	24.1428
08/27 02:00:00	20.325	0	23.7117	23.7549	23.7003	23.6032	23.7919	2.2025	0	2.2025e-06	14.325	23.791	23.7094	23.9904
08/27 03:00:00	19.95	0	23.7014	23.6614	23.6056	23.5154	23.6933	2.20277	0	2.20277e-06	13.95	23.7094	23.6738	23.8969
08/27 04:00:00	19.4	0	23.6994	23.5261	23.4683	23.3863	23.5532	2.203	0	2.203e-06	13.4	23.6738	23.6312	23.8429
08/27 05:00:00	19.1292	0	23.7001	23.4583	23.4011	23.3247	23.4806	3.52597	0	3.52597e-06	13.1292	23.6312	23.6112	23.7915
08/27 06:00:00	18.9	25.6389	23.7018	23.4358	23.5567	23.3234	23.4551	3.08441	0	3.08441e-06	13.4128	23.6112	23.6176	23.7816
08/27 07:00:00	21.2833	126.843	23.7383	23.8195	24.6785	23.7343	23.8335	8.37131	0	8.37131e-06	17.8202	23.6176	23.8051	23.9389
08/27 08:00:00	23.8958	300.711	25.3351	25.8689	26.6052	25.708	25.7046	112697	1	0.112697	23.91	23.8051	25.516	24.0697
08/27 09:00:00	25.3208	454.991	22.8759	22.6979	22.772	22.7092	22.5877	528138	1	0.528138	28.4207	25.516	22.8204	24.9439
08/27 10:00:00	26.6958	467.343	22.5019	22.5019	22.5017	22.5044	22.5018	496454	1	0.496454	30.0427	22.8204	22.5021	22.4109
08/27 11:00:00	27.7958	571.859	22.5013	22.5014	22.5014	22.5068	22.5014	471750	0.8	0.47175	33.233	22.5021	22.5018	22.2636
08/27 12:00:00	28.3	676.574	22.5007	22.5008	22.5008	22.5012	22.5008	405577	0.4	0.405577	35.8315	22.5018	22.5008	22.5069
08/27 13:00:00	27.7042	760.187	22.5014	22.5017	22.5017	22.5336	22.5016	480761	0.8	0.480761	36.9079	22.5008	22.5046	22.3672
08/27 14:00:00	27.2	707.597	22.5017	22.6237	22.5019	22.6916	22.502	541245	1	0.541245	35.3519	22.5046	22.5316	22.1763
08/27 15:00:00	27.2	545.649	22.5016	22.5211	22.5017	22.7203	22.5018	538524	1	0.538524	32.113	22.5316	22.5244	22.0984
08/27 16:00:00	27.2	406.22	22.5015	22.5016	22.5016	22.6667	22.5016	535663	1	0.535663	29.3244	22.5244	22.5173	22.0023
08/27 17:00:00	26.6042	243.783	22.5014	22.5016	22.5016	22.5138	22.5016	525093	1	0.525093	25.4798	22.5173	22.5027	21.8883
08/27 18:00:00	25.5042	87.0975	22.5005	22.5007	22.5007	22.5007	22.5007	379332	0.5	0.379332	21.2461	22.5027	22.5006	22.0691
08/27 19:00:00	24.0792	13.1281	22.5002	22.5011	22.5012	22.5011	22.5012	282915	0	0.282915	18.3417	22.5006	22.5005	22.1927
08/27 20:00:00	23.0292	0	23.645	24.124	24.155	24.0807	24.2526	7.49025	0	7.49025e-06	17.0292	22.5005	23.7967	22.8083
08/27 21:00:00	22.475	0	23.9782	24.4155	24.4371	24.336	24.5418	3.52534	0	3.52534e-06	16.475	23.7967	24.113	24.0697
08/27 22:00:00	22.2	0	24.0126	24.4038	24.415	24.3025	24.5233	2.20266	0	2.20266e-06	16.2	24.113	24.1302	24.3727
08/27 23:00:00	22.2	0	24.0349	24.3858	24.388	24.2707	24.4992	2.20287	0	2.20287e-06	16.2	24.1302	24.138	24.3897
08/27 24:00:00	21.9292	0	24.0476	24.3448	24.3386	24.2202	24.4512	2.20309	0	2.20309e-06	15.9292	24.138	24.1325	24.3881
08/28 01:00:00	21.7	0	24.0551	24.2872	24.2747	24.1581	24.3864	2.20412	0	2.20412e-06	15.7	24.1325	24.1188	24.3748
08/28 02:00:00	21.7	0	24.0601	24.2488	24.2317	24.117	24.3405	2.20416	0	2.20416e-06	15.7	24.1188	24.1096	24.3613
08/28 03:00:00	21.7	0	24.0642	24.2154	24.1938	24.0809	24.2992	2.20419	0	2.20419e-06	15.7	24.1096	24.1012	24.3522
08/28 04:00:00	21.7	0	24.0674	24.1791	24.1532	24.0426	24.2555	2.20412	0	2.20412e-06	15.7	24.1012	24.0915	24.3439
08/28 05:00:00	21.7	0	24.0714	24.1527	24.1235	24.0152	24.2225	3.52513	0	3.52513e-06	15.7	24.0915	24.0854	24.3343
08/28 06:00:00	21.7	12.3647	24.075	24.1609	24.1362	24.0242	24.226	3.08536	0	3.08536e-06	15.9473	24.0854	24.0906	24.3368
08/28 07:00:00	21.7	42.5412	24.0889	24.2599	24.2634	24.1252	24.3231	8.3746	0	8.3746e-06	16.5508	24.0906	24.1322	24.3625
08/28 08:00:00	21.7	95.1484	25.6914	25.8728	25.8599	25.7589	25.8548	103502	1	0.103502	17.603	24.1322	25.7343	24.198
08/28 09:00:00	22.5667	238.949	23.1947	22.7836	22.6288	22.7948	22.5961	571279	1	0.571279	21.3456	25.7343	23.0502	24.8162
08/28 10:00:00	23.8958	297.197	22.5955	22.5022	22.5021	22.5022	22.5022	543468	1	0.543468	23.8398	23.0502	22.5669	22.3155
08/28 11:00:00	24.4	250.167	22.5017	22.5013	22.5013	22.5014	22.5014	487708	0.8	0.487708	23.4033	22.5669	22.5016	21.9534
08/28 12:00:00	25.3208	342.828	22.5007	22.5009	22.5009	22.5009	22.5009	415879	0.4	0.415879	26.1774	22.5016	22.5007	22.1517
08/28 13:00:00	26.425	489.549	22.5014	22.5017	22.5017	22.5017	22.5017	490240	0.8	0.49024	30.216	22.5007	22.5015	22.1156
08/28 14:00:00	27.5667	467.237	22.5017	22.5019	22.502	22.6657	22.502	563944	1	0.563944	30.9114	22.5015	22.5175	21.9681
08/28 15:00:00	27.4333	302.9	22.5016	22.5019	22.5018	22.6854	22.5019	577315	1	0.577315	27.4913	22.5175	22.5192	21.8354
08/28 16:00:00	26.375	211.976	22.5015	22.5017	22.5017	22.5392	22.5017	558959	1	0.558959	24.6145	22.5192	22.5052	21.7814
08/28 17:00:00	26.1	110.055	22.5014	22.5016	22.5016	22.5016	22.5016	525439	1	0.525439	22.3011	22.5052	22.5015	21.7665
08/28 18:00:00	26.1	50.87	22.5005	22.5008	22.5008	22.5008	22.5009	403970	0.5	0.40397	21.1174	22.5015	22.5006	22.0059
08/28 19:00:00	25.5042	8.57423	22.5002	22.5014	22.5015	22.5014	22.5015	296501	0	0.296501	19.6757	22.5006	22.5006	22.2067
08/28 20:00:00	24.0792	0	23.7105	24.142	24.1553	24.102	24.226	7.49398	0	7.49398e-06	18.0792	22.5006	23.8444	22.8445
08/28 21:00:00	23.0292	0	24.0591	24.4008	24.4053	24.3393	24.4738	3.52496	0	3.52496e-06	17.0292	23.8444	24.1623	24.1358
08/28 22:00:00	22.475	0	24.095	24.3633	24.361	24.2923	24.4269	2.20406	0	2.20406e-06	16.475	24.1623	24.1739	24.4308
08/28 23:00:00	22.2	0	24.1167	24.3153	24.3067	24.2398	24.3709	2.20413	0	2.20413e-06	16.2	24.1739	24.173	24.4328
08/28 24:00:00	22.2	0	24.1294	24.2885	24.275	24.2102	24.3376	2.20411	0	2.20411e-06	16.2	24.173	24.1727	24.4319
08/29 01:00:00	21.6042	0	24.1372	24.2259	24.2089	24.1475	24.2684	2.20494	0	2.20494e-06	15.6042	24.1727	24.1583	24.4112
08/29 02:00:00	21.1	0	24.1414	24.1368	24.1156	24.0584	24.173	2.20467	0	2.20467e-06	15.1	24.1583	24.1333	24.3798
08/29 03:00:00	21.1	0	24.1431	24.0879	24.0635	24.0097	24.1189	2.20435	0	2.20435e-06	15.1	24.1333	24.1191	24.3551
08/29 04:00:00	21.1	0	24.144	24.0467	24.0199	23.9694	24.073	2.20423	0	2.20423e-06	15.1	24.1191	24.1068	24.341
08/29 05:00:00	21.1	0	24.1461	24.0131	23.9837	23.9364	24.0354	3.5283	0	3.5283e-06	15.1	24.1068	24.0976	24.3289
08/29 06:00:00	21.1	21.6751	24.1481	24.0363	24.0641	23.9711	24.0568	3.08596	0	3.08596e-06	15.5335	24.0976	24.1104	24.3347
08/29 07:00:00	21.425	68.6302	24.165	24.2515	24.3861	24.1906	24.2748	8.37826	0	8.37826e-06	16.7976	24.1104	24.1947	24.3906
08/29 08:00:00	22.2958	84.7009	25.7631	25.8818	25.938	25.8293	25.8277	112685	1	0.112685	17.9899	24.1947	25.7945	24.2516
08/29 09:00:00	23.0708	154.725	23.1367	22.6814	22.6194	22.7006	22.5911	531337	1	0.531337	20.1653	25.7945	22.9904	24.9286
08/29 10:00:00	24.5458	378.166	22.6161	22.5022	22.5021	22.5023	22.5022	537181	1	0.537181	26.1092	22.9904	22.5812	22.3488
08/29 11:00:00	25.8708	468.423	22.5019	22.5016	22.5015	22.5015	22.5016	519299	0.8	0.519299	29.2393	22.5812	22.5018	22.0938
08/29 12:00:00	27.0208	730.358	22.5008	22.501	22.501	22.501	22.501	421751	0.4	0.421751	35.628	22.5018	22.5008	22.4621
08/29 13:00:00	28.0708	662.699	22.5015	22.5016	22.5017	22.5222	22.5016	472947	0.8	0.472947	35.3248	22.5008	22.5035	22.3312
08/29 14:00:00	28.8958	549.829	22.5017	22.5398	22.5018	22.6985	22.5018	535214	1	0.535214	33.8924	22.5035	22.5242	22.1394
08/29 15:00:00	28.5333	375.044	22.5015	22.5016	22.5016	22.6215	22.5016	524938	1	0.524938	30.0342	22.5242	22.513	22.0515
08/29 16:00:00	27.475	390.375	22.5016	22.5016	22.5016	22.5882	22.5016	497662	1	0.497662	29.2825	22.513	22.5098	22.0784
08/29 17:00:00	26.9292	187.047	22.5014	22.5014	22.5014	22.5023	22.5014	468557	1	0.468557	24.6701	22.5098	22.5015	21.9852
08/29 18:00:00	26.1042	55.5535	22.5005	22.5005	22.5005	22.5005	22.5005	341769	0.5	0.341769	21.2152	22.5015	22.5005	22.1546
08/29 19:00:00	24.6792	8.44593	22.5001	22.5005	22.5005	22.5005	22.5005	250623	0	0.250623	18.8481	22.5005	22.5003	22.2854
08/29 20:00:00	22.9792	0	23.7266	24.104	24.0781	24.0666	24.192	7.49542	0	7.49542e-06	16.9792	22.5003	23.8421	22.8064
08/29 21:00:00	21.6042	0	24.0796	24.3311	24.2809	24.264	24.4101	3.52818	0	3.52818e-06	15.6042	23.8421	24.1518	24.0847
08/29 22:00:00	20.5042	0	24.1158	24.2461	24.1856	24.167	24.3145	2.2049	0	2.2049e-06	14.5042	24.1518	24.1486	24.3529
08/29 23:00:00	19.0792	0	24.1355	24.1079	24.0389	24.0206	24.1652	2.20477	0	2.20477e-06	13.0792	24.1486	24.118	24.3008
08/29 24:00:00	18.0292	0	24.1435	23.9577	23.8809	23.8633	24.0033	2.20448	0	2.20448e-06	12.0292	24.118	24.0758	24.2347
08/30 01:00:00	17.475	0	24.1451	23.8444	23.7611	23.7447	23.8798	2.20517	0	2.20517e-06	11.475	24.0758	24.0407	24.174
08/30 02:00:00	17.2	0	24.1435	23.7426	23.6541	23.6394	23.769	2.20533	0	2.20533e-06	11.2	24.0407	24.0073	24.1299
08/30 03:00:00	16.9292	0	24.1393	23.6498	23.557	23.5448	23.6685	2.20564	0	2.20564e-06	10.9292	24.0073	23.9751	24.0876
08/30 04:00:00	16.1042	0	24.1325	23.5226	23.4255	23.4162	23.5329	2.20582	0	2.20582e-06	10.1042	23.9751	23.9306	24.0275
08/30 05:00:00	15.275	0	24.1233	23.3795	23.2784	23.2722	23.3814	3.52998	0	3.52998e-06	9.275	23.9306	23.8795	23.9551
08/30 06:00:00	15	29.1658	24.115	23.3343	23.674	23.2623	23.3291	3.08853	0	3.08853e-06	9.58332	23.8795	23.8882	23.9153
08/30 07:00:00	16.7875	144.35	24.1402	23.6645	24.6441	23.6107	23.651	8.38197	0	8.38197e-06	13.6745	23.8882	24.0448	24.0641
08/30 08:00:00	19.2208	326.744	25.7518	25.8101	26.9043	25.6643	25.648	50944.4	1	0.0509444	19.7557	24.0448	25.8092	24.3083
08/30 09:00:00	20.9208	504.365	23.0934	22.6661	22.9319	22.6667	22.5724	330305	1	0.330305	25.0081	25.8092	22.9725	25.5786
08/30 10:00:00	22.2958	651.931	22.6237	22.5013	22.5209	22.5013	22.5012	352639	1	0.352639	29.3345	22.9725	22.5873	22.8727
08/30 11:00:00	23.3958	723.135	22.502	22.5009	22.5008	22.5009	22.5009	339937	0.8	0.339937	31.8585	22.5873	22.5016	22.6085
08/30 12:00:00	24.4958	659.959	22.5007	22.5002	22.5002	22.5003	22.5003	278456	0.4	0.278456	31.695	22.5016	22.5005	22.6619
08/30 13:00:00	25.5958	771.287	22.5014	22.5607	22.5011	22.5011	22.5011	337948	0.8	0.337948	35.0216	22.5005	22.507	22.6359
08/30 14:00:00	27.0208	731.673	22.5017	22.8153	22.5013	22.5013	22.5014	390227	1	0.390227	35.6543	22.507	22.5317	22.5418
08/30 15:00:00	27.8	587.609	22.5016	22.7391	22.5011	22.5012	22.5012	404136	1	0.404136	33.5522	22.5317	22.5242	22.4616
08/30 16:00:00	27.8	413.995	22.5015	22.524	22.5011	22.5011	22.5011	411256	1	0.411256	30.0799	22.5242	22.5036	22.3186
08/30 17:00:00	27.475	267.326	22.5014	22.5011	22.5011	22.5011	22.5011	415382	1	0.415382	26.8215	22.5036	22.5013	22.1769
08/30 18:00:00	26.3333	99.3518	22.5005	22.5003	22.5003	22.5003	22.5002	318038	0.5	0.318038	22.3204	22.5013	22.5004	22.2478
08/30 19:00:00	24.3542	10.3714	22.5001	22.5003	22.5004	22.5003	22.5004	247678	0	0.247678	18.5616	22.5004	22.5002	22.2824
08/30 20:00:00	22.7042	0	23.7325	24.1857	24.1295	23.9472	24.3896	7.49826	0	7.49826e-06	16.7042	22.5002	23.8569	22.7969
08/30 21:00:00	21.0083	0	24.0881	24.421	24.3337	24.0998	24.6045	3.53043	0	3.53043e-06	15.0083	23.8569	24.1648	24.0789
08/30 22:00:00	20	0	24.1249	24.3239	24.2251	23.9864	24.4919	2.20558	0	2.20558e-06	14	24.1648	24.1575	24.3485
08/30 23:00:00	19.4042	0	24.1458	24.2466	24.14	23.903	24.4026	2.20521	0	2.20521e-06	13.4042	24.1575	24.1466	24.3208
08/30 24:00:00	18.9	0	24.1565	24.1451	24.0328	23.8012	24.2893	2.20528	0	2.20528e-06	12.9	24.1466	24.1219	24.2928
08/31 01:00:00	18.575	0	24.1608	24.0607	23.944	23.7192	24.1935	2.2066	0	2.2066e-06	12.575	24.1219	24.0984	24.2572
08/31 02:00:00	18.0292	0	24.1618	23.9572	23.8368	23.6198	24.0777	2.20685	0	2.20685e-06	12.0292	24.0984	24.0669	24.2153
08/31 03:00:00	17.8	0	24.1602	23.8683	23.7452	23.536	23.9777	2.20695	0	2.20695e-06	11.8	24.0669	24.0383	24.1763
08/31 04:00:00	17.2042	0	24.1569	23.7649	23.6393	23.4393	23.8622	2.20704	0	2.20704e-06	11.2042	24.0383	24.0041	24.1276
08/31 05:00:00	16.7	0	24.1525	23.6462	23.5185	23.3286	23.7326	3.53032	0	3.53032e-06	10.7	24.0041	23.9647	24.0766
08/31 06:00:00	16.7	28.1048	24.1495	23.6314	23.9307	23.3537	23.7068	3.09042	0	3.09042e-06	11.2621	23.9647	23.9858	24.057
08/31 07:00:00	18.1625	150.039	24.1794	23.9425	25.0581	23.6933	24.0038	8.38507	0	8.38507e-06	15.1633	23.9858	24.1506	24.2115
08/31 08:00:00	21.2417	329.833	25.717	25.9213	26.9181	25.595	25.7492	109225	1	0.109225	21.8383	24.1506	25.7957	24.348
08/31 09:00:00	23.6667	485.465	23.1275	22.6992	23.1197	22.6609	22.5834	475310	1	0.47531	27.376	25.7957	23.0102	25.3077
08/31 10:00:00	26.5125	551.176	22.6463	22.5016	22.5825	22.5017	22.5016	479635	1	0.479635	31.536	23.0102	22.6066	22.6888
08/31 11:00:00	27.4333	304.736	22.502	22.5011	22.5011	22.5012	22.5011	460453	0.8	0.460453	27.528	22.6066	22.5018	22.1977
08/31 12:00:00	26.1042	289.224	22.5006	22.5006	22.5006	22.5006	22.5006	378775	0.4	0.378775	25.8887	22.5018	22.5006	22.2286
08/31 13:00:00	25.275	253.993	22.5014	22.5015	22.5015	22.5015	22.5015	436620	0.8	0.43662	24.3549	22.5006	22.5014	22.0399
08/31 14:00:00	24.4042	188.571	22.5016	22.5017	22.5017	22.5017	22.5017	484979	1	0.484979	22.1756	22.5014	22.5016	21.853
08/31 15:00:00	23.9	257.621	22.5015	22.5028	22.5018	22.5018	22.5018	504157	1	0.504157	23.0524	22.5016	22.5017	21.8384
08/31 16:00:00	23.9	285.955	22.5015	22.5095	22.5017	22.5017	22.5017	495135	1	0.495135	23.6191	22.5017	22.5023	21.879
08/31 17:00:00	23.3042	82.8345	22.5849	22.5006	22.5006	22.5007	22.5006	544307	1	0.544307	18.9609	22.5023	22.5591	21.6051
08/31 18:00:00	22.2042	26.1192	22.5011	22.5011	22.5012	22.5011	22.5011	410081	0.5	0.410081	16.7266	22.5591	22.5011	21.8981
08/31 19:00:00	21.375	3.38949	22.5003	22.5011	22.5011	22.501	22.5011	293295	0	0.293295	15.4428	22.5011	22.5005	22.0696
08/31 20:00:00	20.8292	0	23.7295	23.9093	23.9745	23.7633	23.8895	7.50221	0	7.50221e-06	14.8292	22.5005	23.7732	22.733
08/31 21:00:00	20.6	0	24.0755	24.1369	24.2148	23.9572	24.1076	3.5319	0	3.5319e-06	14.6	23.7732	24.0799	23.9822
08/31 22:00:00	19.8417	0	24.1074	24.0876	24.1648	23.905	24.0562	2.20636	0	2.20636e-06	13.8417	24.0799	24.0865	24.2592
08/31 23:00:00	18.3875	0	24.1243	23.9537	24.0283	23.7753	23.9192	2.20629	0	2.20629e-06	12.3875	24.0865	24.0573	24.2158
08/31 24:00:00	16.9417	0	24.1303	23.7865	23.8556	23.6131	23.7482	2.20653	0	2.20653e-06	10.9417	24.0573	24.0102	24.1374
