# Supplementary material for: Multi-Objective Control of Air Conditioning Improves Cost, Comfort and System Energy Balance
Source: Preprints.org preprint supplement (doi:10.20944/preprints201808.0120.v3), 2018-09-10
Supplement: Supplementary file 8 [file Loew optimized cost comfort analysis.xlsx]

## Sheet: RefBldgLargeOfficeNew2004_Chica
		145	20	12	20	12				5.48313e+06	498466	9599.48
Date/Time	Environment:Site Outdoor Air Drybulb Temperature [C](TimeStep)	CORE_MID:Zone Air Temperature [C](TimeStep)	PERIMETER_MID_ZN_1:Zone Air Temperature [C](TimeStep)	PERIMETER_MID_ZN_2:Zone Air Temperature [C](TimeStep)	PERIMETER_MID_ZN_3:Zone Air Temperature [C](TimeStep)	PERIMETER_MID_ZN_4:Zone Air Temperature [C](TimeStep)	Whole Building:Facility Total HVAC Electric Demand Power [W](TimeStep)	BLDG_OCC_SCH:Schedule Value [](TimeStep)	TSET1:Schedule Value [](TimeStep)	discomfort (209 people)	row	electricity price
08/01 00:05:00	18.475	25.1101	24.9302	24.9063	24.8024	25.4076	2.20742	0	29.5735	0	0	43.42
08/01 00:10:00	18.65	25.1092	24.9294	24.9049	24.8007	25.4049	2.20506	0	29.5735	0	1	43.42
08/01 00:15:00	18.825	25.1084	24.9308	24.9057	24.8012	25.4045	2.20322	0	29.5735	0	2	43.42
08/01 00:20:00	19	25.1075	24.9335	24.908	24.803	25.4054	2.20186	0	29.5735	0	3	43.42
08/01 00:25:00	19.175	25.1067	24.9372	24.9113	24.8058	25.4073	2.20097	0	29.5735	0	4	43.42
08/01 00:30:00	19.35	25.106	24.9417	24.9153	24.8094	25.4101	2.20052	0	29.5735	0	5	43.42
08/01 00:35:00	19.525	25.1052	24.9468	24.92	24.8136	25.4135	2.20048	0	29.5735	0	6	43.42
08/01 00:40:00	19.7	25.1045	24.9524	24.9253	24.8186	25.4174	2.20083	0	29.5735	0	7	43.42
08/01 00:45:00	19.875	25.1038	24.9581	24.931	24.8241	25.4218	2.20156	0	29.5735	0	8	43.42
08/01 00:50:00	20.05	25.1032	24.9642	24.9371	24.8299	25.4266	2.20264	0	29.5735	0	9	43.42
08/01 00:55:00	20.225	25.1026	24.9707	24.9436	24.8361	25.4319	2.20405	0	29.5735	0	10	43.42
08/01 01:00:00	20.4	25.1021	24.9776	24.9506	24.8427	25.4381	2.2058	0	29.5735	0	11	43.42
08/01 01:05:00	20.325	23.911	23.0456	22.6623	23.032	22.7835	420636	0	16.0084	0	12	35.32
08/01 01:10:00	20.25	22.7401	21.6893	21.1991	21.7272	21.2039	485151	0	16.0084	0	13	35.32
08/01 01:15:00	20.175	22.312	21.3557	20.8797	21.3919	20.8952	511049	0	16.0084	0	14	35.32
08/01 01:20:00	20.1	22.0665	21.1593	20.6839	21.1959	20.6947	521975	0	16.0084	0	15	35.32
08/01 01:25:00	20.025	21.9444	21.0413	20.5621	21.0798	20.5657	526898	0	16.0084	0	16	35.32
08/01 01:30:00	19.95	21.8519	20.9412	20.4581	20.9815	20.4557	529481	0	16.0084	0	17	35.32
08/01 01:35:00	19.875	21.7758	20.8517	20.3644	20.8937	20.3565	530757	0	16.0084	0	18	35.32
08/01 01:40:00	19.8	21.7099	20.7704	20.2797	20.8138	20.2664	531244	0	16.0084	0	19	35.32
08/01 01:45:00	19.725	21.6509	20.695	20.2012	20.7402	20.183	531241	0	16.0084	0	20	35.32
08/01 01:50:00	19.65	21.5969	20.6244	20.1283	20.6713	20.1056	530931	0	16.0084	0	21	35.32
08/01 01:55:00	19.575	21.5467	20.5582	20.0597	20.6064	20.0328	530425	0	16.0084	0	22	35.32
08/01 02:00:00	19.5	21.4994	20.4958	19.9955	20.545	19.9643	529793	0	16.0084	0	23	35.32
08/01 02:05:00	19.4333	21.8471	21.4561	21.1588	21.4633	21.2328	259779	0	21.7346	0	24	31.33
08/01 02:10:00	19.3667	21.7365	21.7349	21.7325	21.735	21.7347	324612	0	21.7346	0	25	31.33
08/01 02:15:00	19.3	21.7344	21.7349	21.7347	21.735	21.7348	312456	0	21.7346	0	26	31.33
08/01 02:20:00	19.2333	21.7343	21.7351	21.735	21.7351	21.735	306375	0	21.7346	0	27	31.33
08/01 02:25:00	19.1667	21.7343	21.7352	21.7352	21.7352	21.7352	301090	0	21.7346	0	28	31.33
08/01 02:30:00	19.1	21.7344	21.7353	21.7353	21.7353	21.7353	296673	0	21.7346	0	29	31.33
08/01 02:35:00	19.0333	21.7344	21.7354	21.7353	21.7354	21.7354	292754	0	21.7346	0	30	31.33
08/01 02:40:00	18.9667	21.7344	21.7355	21.7354	21.7354	21.7355	289200	0	21.7346	0	31	31.33
08/01 02:45:00	18.9	21.7344	21.7355	21.7355	21.7355	21.7355	285923	0	21.7346	0	32	31.33
08/01 02:50:00	18.8333	21.7344	21.7355	21.7355	21.7355	21.7356	282863	0	21.7346	0	33	31.33
08/01 02:55:00	18.7667	21.7345	21.7356	21.7356	21.7356	21.7356	279982	0	21.7346	0	34	31.33
08/01 03:00:00	18.7	21.7345	21.7356	21.7356	21.7356	21.7356	277252	0	21.7346	0	35	31.33
08/01 03:05:00	18.625	21.5061	20.9421	20.6583	20.9779	20.5903	442649	0	17.7544	0	36	29.39
08/01 03:10:00	18.55	21.271	20.3522	19.9225	20.4026	19.846	472132	0	17.7544	0	37	29.39
08/01 03:15:00	18.475	21.1554	20.1644	19.7125	20.2156	19.6389	477733	0	17.7544	0	38	29.39
08/01 03:20:00	18.4	21.0962	20.0778	19.6174	20.1295	19.5431	475286	0	17.7544	0	39	29.39
08/01 03:25:00	18.325	21.0489	20.0093	19.5423	20.0616	19.4665	470398	0	17.7544	0	40	29.39
08/01 03:30:00	18.25	21.0078	19.95	19.478	20.0029	19.4003	464423	0	17.7544	0	41	29.39
08/01 03:35:00	18.175	20.9704	19.896	19.4198	19.9495	19.3403	457932	0	17.7544	0	42	29.39
08/01 03:40:00	18.1	20.9356	19.8459	19.3662	19.8999	19.2849	451049	0	17.7544	0	43	29.39
08/01 03:45:00	18.025	20.9026	19.7986	19.3158	19.853	19.2328	444192	0	17.7544	0	44	29.39
08/01 03:50:00	17.95	20.8711	19.7536	19.2682	19.8085	19.1835	437429	0	17.7544	0	45	29.39
08/01 03:55:00	17.875	20.8407	19.7104	19.2227	19.7657	19.1364	430796	0	17.7544	0	46	29.39
08/01 04:00:00	17.8	20.8112	19.6689	19.1792	19.7245	19.0914	424323	0	17.7544	0	47	29.39
08/01 04:05:00	17.8	20.7825	19.6305	19.1389	19.6863	19.0496	421652	0	18.4055	0	48	29.17
08/01 04:10:00	17.8	20.7549	19.5937	19.1005	19.6498	19.0097	419473	0	18.4055	0	49	29.17
08/01 04:15:00	17.8	20.7276	19.5582	19.0635	19.6145	18.9713	417620	0	18.4055	0	50	29.17
08/01 04:20:00	17.8	20.7008	19.5239	19.0278	19.5804	18.9341	415979	0	18.4055	0	51	29.17
08/01 04:25:00	17.8	20.6745	19.4904	18.9932	19.5472	18.8981	414479	0	18.4055	0	52	29.17
08/01 04:30:00	17.8	20.6488	19.458	18.96	19.5151	18.8633	413073	0	18.4055	0	53	29.17
08/01 04:35:00	17.8	20.6234	19.4264	18.9272	19.4836	18.8293	411730	0	18.4055	0	54	29.17
08/01 04:40:00	17.8	20.5983	19.3955	18.8954	19.4529	18.7962	410431	0	18.4055	0	55	29.17
08/01 04:45:00	17.8	20.5736	19.3652	18.8644	19.4231	18.7639	409164	0	18.4055	0	56	29.17
08/01 04:50:00	17.8	20.5492	19.3431	18.8419	19.4013	18.7401	407920	0	18.4055	0	57	29.17
08/01 04:55:00	17.8	20.5251	19.3222	18.8574	19.3898	18.7171	406693	0	18.4055	0	58	29.17
08/01 05:00:00	17.8	20.5016	19.3011	18.8702	19.3785	18.694	405478	0	18.4055	0	59	29.17
08/01 05:05:00	17.8417	21.1621	20.3042	20.0238	20.3449	19.9193	3.09426	0	30.2407	0	60	33.28
08/01 05:10:00	17.8833	21.9042	21.2774	21.1341	21.2887	21.0772	3.09012	0	30.2407	0	61	33.28
08/01 05:15:00	17.925	22.3371	21.7666	21.702	21.7664	21.6494	3.08644	0	30.2407	0	62	33.28
08/01 05:20:00	17.9667	22.5979	22.0368	22.0302	22.0319	21.9634	3.08405	0	30.2407	0	63	33.28
08/01 05:25:00	18.0083	22.8199	22.2561	22.3107	22.2485	22.217	3.08292	0	30.2407	0	64	33.28
08/01 05:30:00	18.05	22.9463	22.3813	22.4819	22.3727	22.3615	3.08282	0	30.2407	0	65	33.28
08/01 05:35:00	18.0917	23.0446	22.4852	22.6594	22.4781	22.4807	3.08376	0	30.2407	0	66	33.28
08/01 05:40:00	18.1333	23.1237	22.5772	22.8602	22.5754	22.5849	3.08565	0	30.2407	0	67	33.28
08/01 05:45:00	18.175	23.189	22.6619	23.0841	22.6665	22.6797	3.08844	0	30.2407	0	68	33.28
08/01 05:50:00	18.2167	23.2447	22.742	23.3295	22.7527	22.7682	3.09207	0	30.2407	0	69	33.28
08/01 05:55:00	18.2583	23.2934	22.8205	23.4392	22.8443	22.8536	3.09305	0	30.2407	0	70	33.28
08/01 06:00:00	18.3	23.3363	22.8963	23.5026	22.9334	22.936	3.08989	0	30.2407	0	71	33.28
08/01 06:05:00	18.4417	23.3744	22.9717	23.573	23.0198	23.0181	8.3735	0	29.6442	0	72	38.13
08/01 06:10:00	18.5833	23.4103	23.0461	23.6541	23.1035	23.0996	8.36942	0	29.6442	0	73	38.13
08/01 06:15:00	18.725	23.4424	23.1199	23.7444	23.1852	23.1803	8.38417	0	29.6442	0	74	38.13
08/01 06:20:00	18.8667	23.4713	23.1932	23.8416	23.2653	23.2602	8.38699	0	29.6442	0	75	38.13
08/01 06:25:00	19.0083	23.4976	23.2664	23.9442	23.344	23.3396	8.37251	0	29.6442	0	76	38.13
08/01 06:30:00	19.15	23.5216	23.3395	24.051	23.4215	23.4186	8.37019	0	29.6442	0	77	38.13
08/01 06:35:00	19.2917	23.5435	23.4117	24.1485	23.4969	23.4961	8.3864	0	29.6442	0	78	38.13
08/01 06:40:00	19.4333	23.5638	23.4828	24.2371	23.5694	23.5722	8.38721	0	29.6442	0	79	38.13
08/01 06:45:00	19.575	23.5827	23.5531	24.3187	23.6391	23.647	8.37128	0	29.6442	0	80	38.13
08/01 06:50:00	19.7167	23.6005	23.6228	24.3945	23.7064	23.7208	8.37077	0	29.6442	0	81	38.13
08/01 06:55:00	19.8583	23.6173	23.6919	24.4656	23.7714	23.7938	8.38848	0	29.6442	0	82	38.13
08/01 07:00:00	20	23.6333	23.7604	24.5328	23.8344	23.8659	8.3873	0	29.6442	0	83	38.13
08/01 07:05:00	20.1833	24.0333	24.2196	24.9835	24.2886	24.3281	15.4166	1	29.1723	6359.39	84	45.51
08/01 07:10:00	20.3667	24.594	24.8078	25.5618	24.8717	24.9178	15.449	1	29.1723	11412.4	85	45.51
08/01 07:15:00	20.55	24.9706	25.2208	25.9258	25.2721	25.3256	15.4211	1	29.1723	15658.1	86	45.51
08/01 07:20:00	20.7333	25.284	25.5772	26.2197	25.6122	25.6777	109943	1	29.1723	19736	87	45.51
08/01 07:25:00	20.9167	25.4574	25.7866	26.3906	25.8097	25.8874	106816	1	29.1723	22249.3	88	45.51
08/01 07:30:00	21.1	25.5912	25.963	26.5319	25.9745	26.063	103520	1	29.1723	24357.3	89	45.51
08/01 07:35:00	21.2833	25.7	26.1167	26.6564	26.1161	26.2139	100807	1	29.1723	26188.1	90	45.51
08/01 07:40:00	21.4667	25.7922	26.2543	26.7701	26.2417	26.3477	98501.9	1	29.1723	27829.1	91	45.51
08/01 07:45:00	21.65	25.873	26.3836	26.8942	26.3565	26.4699	96493.3	1	29.1723	29366.1	92	45.51
08/01 07:50:00	21.8333	25.9458	26.5049	27.0102	26.4629	26.5829	15.4273	1	29.1723	30807.7	93	45.51
08/01 07:55:00	22.0167	26.0126	26.6189	27.1169	26.5626	26.6886	94713.4	1	29.1723	32172.4	94	45.51
08/01 08:00:00	22.2	26.0747	26.7272	27.2169	26.6567	26.7884	93116	1	29.1723	33478	95	45.51
08/01 08:05:00	22.3417	24.952	24.6879	24.7444	24.7107	24.4059	410743	1	23.9247	12862.2	96	53.14
08/01 08:10:00	22.4833	23.9409	23.9395	23.9437	23.9392	23.9353	303790	1	23.9247	4770.19	97	53.14
08/01 08:15:00	22.625	23.9261	23.9288	23.9292	23.9287	23.9288	273411	1	23.9247	4681.2	98	53.14
08/01 08:20:00	22.7667	23.9262	23.9286	23.9288	23.9285	23.9286	271210	1	23.9247	4680.92	99	53.14
08/01 08:25:00	22.9083	23.9262	23.9282	23.9284	23.9282	23.9282	271118	1	23.9247	4680.34	100	53.14
08/01 08:30:00	23.05	23.9262	23.928	23.928	23.9279	23.9279	271527	1	23.9247	4679.9	101	53.14
08/01 08:35:00	23.1917	23.9263	23.9278	23.9277	23.9277	23.9277	272500	1	23.9247	4679.63	102	53.14
08/01 08:40:00	23.3333	23.9263	23.9274	23.9275	23.9275	23.9275	273244	1	23.9247	4679.32	103	53.14
08/01 08:45:00	23.475	23.9263	23.9272	23.9274	23.9274	23.9273	273984	1	23.9247	4679.1	104	53.14
08/01 08:50:00	23.6167	23.9264	23.9271	23.9272	23.9272	23.9272	274477	1	23.9247	4678.98	105	53.14
08/01 08:55:00	23.7583	23.9264	23.927	23.9271	23.9271	23.9271	275958	1	23.9247	4678.94	106	53.14
08/01 09:00:00	23.9	23.9264	23.9269	23.927	23.927	23.927	277438	1	23.9247	4678.91	107	53.14
08/01 09:05:00	24.0417	23.4917	23.4792	23.483	23.4793	23.48	358402	1	23.4616	2244.82	108	65.12
08/01 09:10:00	24.1833	23.464	23.4643	23.4643	23.4644	23.4643	328437	1	23.4616	2136.77	109	65.12
08/01 09:15:00	24.325	23.464	23.4642	23.4641	23.4643	23.4642	311699	1	23.4616	2136.63	110	65.12
08/01 09:20:00	24.4667	23.4639	23.464	23.4639	23.464	23.464	313399	1	23.4616	2136.09	111	65.12
08/01 09:25:00	24.6083	23.4638	23.4639	23.4637	23.4639	23.4638	315187	1	23.4616	2135.7	112	65.12
08/01 09:30:00	24.75	23.4638	23.4638	23.4636	23.4638	23.4637	317354	1	23.4616	2135.4	113	65.12
08/01 09:35:00	24.8917	23.4637	23.4637	23.4635	23.4637	23.4636	319464	1	23.4616	2135.15	114	65.12
08/01 09:40:00	25.0333	23.4637	23.4636	23.4634	23.4636	23.4635	321541	1	23.4616	2134.92	115	65.12
08/01 09:45:00	25.175	23.4637	23.4635	23.4633	23.4635	23.4635	323695	1	23.4616	2134.73	116	65.12
08/01 09:50:00	25.3167	23.4636	23.4635	23.4633	23.4635	23.4634	325922	1	23.4616	2134.57	117	65.12
08/01 09:55:00	25.4583	23.4636	23.4634	23.4633	23.4634	23.4634	328212	1	23.4616	2134.44	118	65.12
08/01 10:00:00	25.6	23.4636	23.4634	23.4632	23.4634	23.4633	330555	1	23.4616	2134.33	119	65.12
08/01 10:05:00	25.6917	23.4533	23.4537	23.4538	23.4536	23.4537	319966	0.8	23.4511	1671.96	120	77.96
08/01 10:10:00	25.7833	23.4527	23.4526	23.4525	23.4526	23.4526	316426	0.8	23.4511	1669.26	121	77.96
08/01 10:15:00	25.875	23.4527	23.4525	23.4523	23.4525	23.4524	316588	0.8	23.4511	1669.01	122	77.96
08/01 10:20:00	25.9667	23.4527	23.4525	23.4523	23.4525	23.4524	317144	0.8	23.4511	1668.96	123	77.96
08/01 10:25:00	26.0583	23.4527	23.4525	23.4523	23.4524	23.4524	318032	0.8	23.4511	1668.94	124	77.96
08/01 10:30:00	26.15	23.4527	23.4525	23.4523	23.4524	23.4524	319092	0.8	23.4511	1668.92	125	77.96
08/01 10:35:00	26.2417	23.4526	23.4525	23.4523	23.4524	23.4524	320315	0.8	23.4511	1668.91	126	77.96
08/01 10:40:00	26.3333	23.4526	23.4525	23.4523	23.4524	23.4524	321648	0.8	23.4511	1668.9	127	77.96
08/01 10:45:00	26.425	23.4526	23.4525	23.4523	23.4524	23.4524	323052	0.8	23.4511	1668.9	128	77.96
08/01 10:50:00	26.5167	23.4526	23.4525	23.4524	23.4524	23.4524	324507	0.8	23.4511	1668.9	129	77.96
08/01 10:55:00	26.6083	23.4526	23.4525	23.4524	23.4525	23.4524	325999	0.8	23.4511	1668.89	130	77.96
08/01 11:00:00	26.7	23.4526	23.4525	23.4524	23.4525	23.4524	327514	0.8	23.4511	1668.89	131	77.96
08/01 11:05:00	26.7417	23.8656	24.0327	24.033	24.0349	24.0339	274622	0.4	24.0395	1852.14	132	89.28
08/01 11:10:00	26.7833	24.0388	24.0398	24.0397	24.0398	24.0398	273530	0.4	24.0395	2178.31	133	89.28
08/01 11:15:00	26.825	24.04	24.0399	24.0399	24.0399	24.0399	272514	0.4	24.0395	2180.89	134	89.28
08/01 11:20:00	26.8667	24.0401	24.04	24.0399	24.04	24.04	271712	0.4	24.0395	2181.07	135	89.28
08/01 11:25:00	26.9083	24.0401	24.0401	24.04	24.0401	24.0401	271344	0.4	24.0395	2181.17	136	89.28
08/01 11:30:00	26.95	24.0401	24.0401	24.04	24.0401	24.0401	271239	0.4	24.0395	2181.26	137	89.28
08/01 11:35:00	26.9917	24.0401	24.0402	24.0401	24.0402	24.0402	271271	0.4	24.0395	2181.34	138	89.28
08/01 11:40:00	27.0333	24.0402	24.0402	24.0401	24.0402	24.0402	271386	0.4	24.0395	2181.42	139	89.28
08/01 11:45:00	27.075	24.0402	24.0402	24.0402	24.0402	24.0402	271818	0.4	24.0395	2181.5	140	89.28
08/01 11:50:00	27.1167	24.0402	24.0403	24.0403	24.0402	24.0403	272305	0.4	24.0395	2181.57	141	89.28
08/01 11:55:00	27.1583	24.0402	24.0403	24.0403	24.0403	24.0403	272722	0.4	24.0395	2181.63	142	89.28
08/01 12:00:00	27.2	24.0403	24.0403	24.0403	24.0403	24.0403	273157	0.4	24.0395	2181.68	143	89.28
08/01 12:05:00	27.2	24.1595	24.1527	24.1538	24.1544	24.1537	277581	0.8	24.162	5054.27	144	98.86
08/01 12:10:00	27.2	24.1631	24.1622	24.1624	24.1625	24.1624	283233	0.8	24.162	5085.67	145	98.86
08/01 12:15:00	27.2	24.1633	24.1632	24.1632	24.1632	24.1631	286195	0.8	24.162	5087.95	146	98.86
08/01 12:20:00	27.2	24.1633	24.1633	24.1633	24.1633	24.1632	288192	0.8	24.162	5088.39	147	98.86
08/01 12:25:00	27.2	24.1634	24.1633	24.1633	24.1633	24.1632	289927	0.8	24.162	5088.68	148	98.86
08/01 12:30:00	27.2	24.1634	24.1634	24.1634	24.1634	24.1633	291451	0.8	24.162	5088.93	149	98.86
08/01 12:35:00	27.2	24.1635	24.1634	24.1634	24.1634	24.1633	292737	0.8	24.162	5089.13	150	98.86
08/01 12:40:00	27.2	24.1635	24.1634	24.1634	24.1634	24.1634	293850	0.8	24.162	5089.31	151	98.86
08/01 12:45:00	27.2	24.1635	24.1634	24.1634	24.1634	24.1634	294840	0.8	24.162	5089.45	152	98.86
08/01 12:50:00	27.2	24.1636	24.1634	24.1634	24.1634	24.1634	295697	0.8	24.162	5089.58	153	98.86
08/01 12:55:00	27.2	24.1636	24.1634	24.1634	24.1634	24.1635	296475	0.8	24.162	5089.68	154	98.86
08/01 13:00:00	27.2	24.1636	24.1634	24.1634	24.1634	24.1635	297191	0.8	24.162	5089.78	155	98.86
08/01 13:05:00	27.25	24.1639	24.1635	24.1636	24.1636	24.1636	306115	1	24.162	6364.19	156	111.02
08/01 13:10:00	27.3	24.164	24.1637	24.1637	24.1637	24.1638	310869	1	24.162	6364.96	157	111.02
08/01 13:15:00	27.35	24.164	24.1637	24.1638	24.1638	24.1638	313129	1	24.162	6365.1	158	111.02
08/01 13:20:00	27.4	24.164	24.1637	24.1638	24.1638	24.1638	314948	1	24.162	6365.16	159	111.02
08/01 13:25:00	27.45	24.164	24.1637	24.1638	24.1638	24.1638	316471	1	24.162	6365.18	160	111.02
08/01 13:30:00	27.5	24.164	24.1637	24.1638	24.1638	24.1638	317759	1	24.162	6365.19	161	111.02
08/01 13:35:00	27.55	24.164	24.1637	24.1638	24.1638	24.1638	319008	1	24.162	6365.2	162	111.02
08/01 13:40:00	27.6	24.164	24.1637	24.1638	24.1638	24.1638	320229	1	24.162	6365.2	163	111.02
08/01 13:45:00	27.65	24.164	24.1637	24.1637	24.1638	24.1638	321399	1	24.162	6365.2	164	111.02
08/01 13:50:00	27.7	24.164	24.1637	24.1637	24.1637	24.1638	322524	1	24.162	6365.19	165	111.02
08/01 13:55:00	27.75	24.164	24.1637	24.1637	24.1637	24.1638	323622	1	24.162	6365.17	166	111.02
08/01 14:00:00	27.8	24.164	24.1637	24.1637	24.1637	24.1638	324689	1	24.162	6365.15	167	111.02
08/01 14:05:00	27.7083	24.164	24.1637	24.1637	24.1637	24.1638	324708	1	24.162	6365.13	168	120.48
08/01 14:10:00	27.6167	24.164	24.1637	24.1637	24.1637	24.1638	324205	1	24.162	6365.1	169	120.48
08/01 14:15:00	27.525	24.164	24.1637	24.1637	24.1637	24.1638	323443	1	24.162	6365.07	170	120.48
08/01 14:20:00	27.4333	24.164	24.1637	24.1637	24.1637	24.1638	322516	1	24.162	6365.03	171	120.48
08/01 14:25:00	27.3417	24.164	24.1637	24.1637	24.1637	24.1638	321480	1	24.162	6364.98	172	120.48
08/01 14:30:00	27.25	24.164	24.1637	24.1637	24.1637	24.1638	320367	1	24.162	6364.93	173	120.48
08/01 14:35:00	27.1583	24.164	24.1637	24.1637	24.1637	24.1638	319242	1	24.162	6364.89	174	120.48
08/01 14:40:00	27.0667	24.164	24.1637	24.1637	24.1637	24.1638	318112	1	24.162	6364.85	175	120.48
08/01 14:45:00	26.975	24.164	24.1637	24.1637	24.1637	24.1638	316967	1	24.162	6364.8	176	120.48
08/01 14:50:00	26.8833	24.164	24.1636	24.1636	24.1637	24.1637	315807	1	24.162	6364.76	177	120.48
08/01 14:55:00	26.7917	24.164	24.1636	24.1636	24.1637	24.1637	314633	1	24.162	6364.71	178	120.48
08/01 15:00:00	26.7	24.164	24.1636	24.1636	24.1636	24.1637	313445	1	24.162	6364.66	179	120.48
08/01 15:05:00	26.7917	24.164	24.1636	24.1636	24.1636	24.1637	313636	1	24.162	6364.64	180	127.36
08/01 15:10:00	26.8833	24.164	24.1636	24.1636	24.1636	24.1637	314476	1	24.162	6364.63	181	127.36
08/01 15:15:00	26.975	24.164	24.1636	24.1636	24.1636	24.1637	315509	1	24.162	6364.65	182	127.36
08/01 15:20:00	27.0667	24.164	24.1636	24.1636	24.1636	24.1637	316686	1	24.162	6364.65	183	127.36
08/01 15:25:00	27.1583	24.164	24.1636	24.1636	24.1636	24.1637	317959	1	24.162	6364.65	184	127.36
08/01 15:30:00	27.25	24.164	24.1636	24.1636	24.1636	24.1637	319278	1	24.162	6364.65	185	127.36
08/01 15:35:00	27.3417	24.164	24.1636	24.1636	24.1636	24.1637	320470	1	24.162	6364.63	186	127.36
08/01 15:40:00	27.4333	24.164	24.1636	24.1636	24.1636	24.1636	321561	1	24.162	6364.6	187	127.36
08/01 15:45:00	27.525	24.164	24.1636	24.1636	24.1636	24.1636	322596	1	24.162	6364.57	188	127.36
08/01 15:50:00	27.6167	24.164	24.1636	24.1636	24.1636	24.1636	324271	1	24.162	6364.61	189	127.36
08/01 15:55:00	27.7083	24.164	24.1637	24.1636	24.1636	24.1636	326213	1	24.162	6364.66	190	127.36
08/01 16:00:00	27.8	24.164	24.1637	24.1636	24.1636	24.1636	327690	1	24.162	6364.68	191	127.36
08/01 16:05:00	27.75	24.164	24.1636	24.1636	24.1636	24.1636	327817	1	24.162	6364.64	192	134.6
08/01 16:10:00	27.7	24.164	24.1636	24.1636	24.1636	24.1636	327180	1	24.162	6364.56	193	134.6
08/01 16:15:00	27.65	24.1639	24.1636	24.1636	24.1636	24.1636	326101	1	24.162	6364.42	194	134.6
08/01 16:20:00	27.6	24.1639	24.1636	24.1635	24.1636	24.1635	324859	1	24.162	6364.28	195	134.6
08/01 16:25:00	27.55	24.1639	24.1636	24.1635	24.1635	24.1635	323539	1	24.162	6364.16	196	134.6
08/01 16:30:00	27.5	24.1639	24.1635	24.1635	24.1635	24.1635	322133	1	24.162	6364.05	197	134.6
08/01 16:35:00	27.45	24.1639	24.1635	24.1635	24.1635	24.1635	320628	1	24.162	6363.95	198	134.6
08/01 16:40:00	27.4	24.1639	24.1635	24.1635	24.1635	24.1635	319117	1	24.162	6363.86	199	134.6
08/01 16:45:00	27.35	24.1639	24.1635	24.1635	24.1635	24.1635	317611	1	24.162	6363.78	200	134.6
08/01 16:50:00	27.3	24.1638	24.1635	24.1635	24.1635	24.1635	316093	1	24.162	6363.71	201	134.6
08/01 16:55:00	27.25	24.1638	24.1635	24.1635	24.1635	24.1635	314553	1	24.162	6363.64	202	134.6
08/01 17:00:00	27.2	24.1638	24.1635	24.1635	24.1635	24.1634	312999	1	24.162	6363.57	203	134.6
08/01 17:05:00	27.1083	24.1632	24.1631	24.1631	24.1631	24.1631	286196	0.5	24.162	3179.84	204	124.7
08/01 17:10:00	27.0167	24.1631	24.1628	24.1628	24.1628	24.1626	276750	0.5	24.162	3178.87	205	124.7
08/01 17:15:00	26.925	24.163	24.1627	24.1627	24.1628	24.1625	273113	0.5	24.162	3178.71	206	124.7
08/01 17:20:00	26.8333	24.163	24.1627	24.1627	24.1627	24.1626	270270	0.5	24.162	3178.62	207	124.7
08/01 17:25:00	26.7417	24.163	24.1627	24.1627	24.1627	24.1626	268058	0.5	24.162	3178.57	208	124.7
08/01 17:30:00	26.65	24.1629	24.1627	24.1627	24.1627	24.1626	266274	0.5	24.162	3178.52	209	124.7
08/01 17:35:00	26.5583	24.1629	24.1627	24.1627	24.1627	24.1626	264728	0.5	24.162	3178.49	210	124.7
08/01 17:40:00	26.4667	24.1629	24.1627	24.1627	24.1627	24.1626	263356	0.5	24.162	3178.46	211	124.7
08/01 17:45:00	26.375	24.1629	24.1627	24.1627	24.1627	24.1627	262122	0.5	24.162	3178.43	212	124.7
08/01 17:50:00	26.2833	24.1629	24.1627	24.1627	24.1627	24.1627	261650	0.5	24.162	3178.41	213	124.7
08/01 17:55:00	26.1917	24.1629	24.1627	24.1627	24.1627	24.1627	260586	0.5	24.162	3178.4	214	124.7
08/01 18:00:00	26.1	24.1629	24.1627	24.1627	24.1627	24.1627	259596	0.5	24.162	3178.38	215	124.7
08/01 18:05:00	26.1	24.1625	24.1625	24.1625	24.1626	24.1625	245803	0	24.162	0	216	107.96
08/01 18:10:00	26.1	24.1624	24.1624	24.1624	24.1625	24.1624	243329	0	24.162	0	217	107.96
08/01 18:15:00	26.1	24.1624	24.1624	24.1624	24.1625	24.1624	240787	0	24.162	0	218	107.96
08/01 18:20:00	26.1	24.1624	24.1624	24.1624	24.1625	24.1624	238909	0	24.162	0	219	107.96
08/01 18:25:00	26.1	24.1624	24.1624	24.1624	24.1625	24.1624	237602	0	24.162	0	220	107.96
08/01 18:30:00	26.1	24.1623	24.1624	24.1624	24.1625	24.1624	236675	0	24.162	0	221	107.96
08/01 18:35:00	26.1	24.1623	24.1624	24.1624	24.1625	24.1625	236010	0	24.162	0	222	107.96
08/01 18:40:00	26.1	24.1623	24.1624	24.1625	24.1625	24.1625	235509	0	24.162	0	223	107.96
08/01 18:45:00	26.1	24.1623	24.1624	24.1625	24.1625	24.1625	235116	0	24.162	0	224	107.96
08/01 18:50:00	26.1	24.1623	24.1624	24.1625	24.1625	24.1625	235026	0	24.162	0	225	107.96
08/01 18:55:00	26.1	24.1623	24.1624	24.1625	24.1625	24.1626	234902	0	24.162	0	226	107.96
08/01 19:00:00	26.1	24.1623	24.1625	24.1625	24.1625	24.1626	234708	0	24.162	0	227	107.96
08/01 19:05:00	25.8667	24.3684	24.6346	24.6594	24.6951	25.014	7.51026	0	27.0829	0	228	94.49
08/01 19:10:00	25.6333	24.6389	25.1443	25.188	25.2394	25.8049	7.49174	0	27.0829	0	229	94.49
08/01 19:15:00	25.4	24.8153	25.4071	25.455	25.4948	26.1385	7.48739	0	27.0829	0	230	94.49
08/01 19:20:00	25.1667	24.9077	25.521	25.5677	25.5948	26.2506	7.49605	0	27.0829	0	231	94.49
08/01 19:25:00	24.9333	24.9754	25.5866	25.631	25.648	26.3051	7.50606	0	27.0829	0	232	94.49
08/01 19:30:00	24.7	25.0272	25.6245	25.6658	25.6735	26.3284	7.49873	0	27.0829	0	233	94.49
08/01 19:35:00	24.4667	25.0681	25.6452	25.6834	25.682	26.3329	7.48782	0	27.0829	0	234	94.49
08/01 19:40:00	24.2333	25.1007	25.6549	25.6903	25.6801	26.3266	7.49182	0	27.0829	0	235	94.49
08/01 19:45:00	24	25.1276	25.6573	25.6902	25.6713	26.3141	7.5082	0	27.0829	0	236	94.49
08/01 19:50:00	23.7667	25.1503	25.6547	25.6853	25.6583	26.2979	7.50569	0	27.0829	0	237	94.49
08/01 19:55:00	23.5333	25.1692	25.6485	25.6769	25.6427	26.2794	7.48906	0	27.0829	0	238	94.49
08/01 20:00:00	23.3	25.1852	25.6397	25.666	25.6253	26.2596	7.48827	0	27.0829	0	239	94.49
08/01 20:05:00	23.2583	25.1776	25.6142	25.6388	25.5919	26.2247	3.52709	0	27.0829	0	240	96.63
08/01 20:10:00	23.2167	25.1707	25.5973	25.6204	25.5677	26.2	3.5312	0	27.0829	0	241	96.63
08/01 20:15:00	23.175	25.1656	25.5852	25.6071	25.549	26.181	3.53458	0	27.0829	0	242	96.63
08/01 20:20:00	23.1333	25.1617	25.5759	25.5964	25.5336	26.1652	3.53253	0	27.0829	0	243	96.63
08/01 20:25:00	23.0917	25.1587	25.5681	25.5874	25.5201	26.1514	3.52748	0	27.0829	0	244	96.63
08/01 20:30:00	23.05	25.1564	25.5612	25.5792	25.5079	26.1389	3.52435	0	27.0829	0	245	96.63
08/01 20:35:00	23.0083	25.1546	25.5546	25.5714	25.4966	26.1272	3.52298	0	27.0829	0	246	96.63
08/01 20:40:00	22.9667	25.1532	25.5482	25.5638	25.4857	26.1162	3.52322	0	27.0829	0	247	96.63
08/01 20:45:00	22.925	25.152	25.5418	25.5562	25.4752	26.1055	3.52494	0	27.0829	0	248	96.63
08/01 20:50:00	22.8833	25.1512	25.5354	25.5487	25.4649	26.0951	3.52803	0	27.0829	0	249	96.63
08/01 20:55:00	22.8417	25.1505	25.5289	25.541	25.4547	26.085	3.53239	0	27.0829	0	250	96.63
08/01 21:00:00	22.8	25.1499	25.5223	25.5333	25.4447	26.075	3.53459	0	27.0829	0	251	96.63
08/01 21:05:00	22.475	25.1494	25.5082	25.5179	25.4274	26.0578	2.20779	0	27.0829	0	252	88.6
08/01 21:10:00	22.15	25.1487	25.4894	25.4976	25.4055	26.0362	2.2057	0	27.0829	0	253	88.6
08/01 21:15:00	21.825	25.1481	25.4674	25.4739	25.3805	26.0119	2.20412	0	27.0829	0	254	88.6
08/01 21:20:00	21.5	25.1475	25.4429	25.4479	25.3533	25.9858	2.20302	0	27.0829	0	255	88.6
08/01 21:25:00	21.175	25.147	25.4166	25.4202	25.3245	25.958	2.20236	0	27.0829	0	256	88.6
08/01 21:30:00	20.85	25.1465	25.3888	25.391	25.2947	25.9294	2.20213	0	27.0829	0	257	88.6
08/01 21:35:00	20.525	25.1461	25.36	25.3611	25.2644	25.9	2.2023	0	27.0829	0	258	88.6
08/01 21:40:00	20.2	25.1456	25.3306	25.331	25.2337	25.8699	2.20285	0	27.0829	0	259	88.6
08/01 21:45:00	19.875	25.145	25.3009	25.3004	25.2026	25.8393	2.20377	0	27.0829	0	260	88.6
08/01 21:50:00	19.55	25.1445	25.2708	25.2695	25.1714	25.808	2.20504	0	27.0829	0	261	88.6
08/01 21:55:00	19.225	25.1439	25.2406	25.2383	25.14	25.7761	2.20663	0	27.0829	0	262	88.6
08/01 22:00:00	18.9	25.1432	25.2101	25.2069	25.1084	25.7435	2.20854	0	27.0829	0	263	88.6
08/01 22:05:00	18.9	25.1425	25.1878	25.1839	25.085	25.7189	2.20973	0	27.0829	0	264	70.37
08/01 22:10:00	18.9	25.1417	25.1703	25.1657	25.0664	25.6991	2.2086	0	27.0829	0	265	70.37
08/01 22:15:00	18.9	25.1409	25.1556	25.1495	25.0506	25.682	2.20634	0	27.0829	0	266	70.37
08/01 22:20:00	18.9	25.14	25.1426	25.1353	25.0365	25.6677	2.20458	0	27.0829	0	267	70.37
08/01 22:25:00	18.9	25.1391	25.1307	25.1224	25.0235	25.6539	2.20331	0	27.0829	0	268	70.37
08/01 22:30:00	18.9	25.1382	25.1195	25.1103	25.0113	25.6407	2.2025	0	27.0829	0	269	70.37
08/01 22:35:00	18.9	25.1372	25.1089	25.0987	24.9987	25.6279	2.20212	0	27.0829	0	270	70.37
08/01 22:40:00	18.9	25.1363	25.0996	25.0876	24.9869	25.6155	2.20215	0	27.0829	0	271	70.37
08/01 22:45:00	18.9	25.1353	25.09	25.0769	24.9756	25.6034	2.20258	0	27.0829	0	272	70.37
08/01 22:50:00	18.9	25.1344	25.0805	25.0664	24.9648	25.5914	2.20337	0	27.0829	0	273	70.37
08/01 22:55:00	18.9	25.1334	25.0711	25.0563	24.9542	25.5796	2.20451	0	27.0829	0	274	70.37
08/01 23:00:00	18.9	25.1325	25.0618	25.0465	24.9442	25.5681	2.20599	0	27.0829	0	275	70.37
08/01 23:05:00	18.85	25.1316	25.0522	25.0358	24.9332	25.5562	2.20779	0	27.0829	0	276	56.15
08/01 23:10:00	18.8	25.1307	25.0426	25.0249	24.922	25.5443	2.20983	0	27.0829	0	277	56.15
08/01 23:15:00	18.75	25.1298	25.0328	25.0139	24.9109	25.5322	2.20949	0	27.0829	0	278	56.15
08/01 23:20:00	18.7	25.1289	25.023	25.003	24.8999	25.5201	2.20703	0	27.0829	0	279	56.15
08/01 23:25:00	18.65	25.128	25.0122	24.9922	24.889	25.5079	2.2051	0	27.0829	0	280	56.15
08/01 23:30:00	18.6	25.1271	25.0019	24.9815	24.8789	25.4957	2.20366	0	27.0829	0	281	56.15
08/01 23:35:00	18.55	25.1262	24.9918	24.9709	24.8685	25.4834	2.20269	0	27.0829	0	282	56.15
08/01 23:40:00	18.5	25.1253	24.9818	24.9603	24.858	25.4712	2.20217	0	27.0829	0	283	56.15
08/01 23:45:00	18.45	25.1245	24.9718	24.9497	24.8473	25.4583	2.20206	0	27.0829	0	284	56.15
08/01 23:50:00	18.4	25.1236	24.9619	24.9396	24.8365	25.4459	2.20234	0	27.0829	0	285	56.15
08/01 23:55:00	18.35	25.1227	24.952	24.9292	24.8258	25.4335	2.20301	0	27.0829	0	286	56.15
08/01 24:00:00	18.3	25.1219	24.9421	24.9185	24.815	25.4213	2.20403	0	27.0829	0	287	56.15
08/02 00:05:00	18.2583	25.121	24.932	24.9077	24.8041	25.4088	2.20447	0	30.7244	0	288	43.9
08/02 00:10:00	18.2167	25.1202	24.9219	24.8969	24.7933	25.3964	2.20616	0	30.7244	0	289	43.9
08/02 00:15:00	18.175	25.1193	24.9117	24.8861	24.7825	25.384	2.20816	0	30.7244	0	290	43.9
08/02 00:20:00	18.1333	25.1185	24.9015	24.8752	24.7716	25.3716	2.20868	0	30.7244	0	291	43.9
08/02 00:25:00	18.0917	25.1176	24.8913	24.8644	24.7608	25.3591	2.20693	0	30.7244	0	292	43.9
08/02 00:30:00	18.05	25.1168	24.8811	24.8535	24.7499	25.3466	2.20481	0	30.7244	0	293	43.9
08/02 00:35:00	18.0083	25.116	24.8709	24.8426	24.7391	25.3342	2.2032	0	30.7244	0	294	43.9
08/02 00:40:00	17.9667	25.1151	24.8606	24.8318	24.7283	25.3217	2.20207	0	30.7244	0	295	43.9
08/02 00:45:00	17.925	25.1143	24.8503	24.8209	24.7174	25.3092	2.20138	0	30.7244	0	296	43.9
08/02 00:50:00	17.8833	25.1135	24.8401	24.81	24.7066	25.2967	2.20113	0	30.7244	0	297	43.9
08/02 00:55:00	17.8417	25.1126	24.8298	24.7991	24.6958	25.2842	2.20127	0	30.7244	0	298	43.9
08/02 01:00:00	17.8	25.1118	24.8195	24.7882	24.685	25.2718	2.2018	0	30.7244	0	299	43.9
08/02 01:05:00	17.75	25.1109	24.809	24.7771	24.6739	25.259	2.2027	0	31.7852	0	300	35.26
08/02 01:10:00	17.7	25.1101	24.7983	24.7658	24.6628	25.2462	2.20394	0	31.7852	0	301	35.26
08/02 01:15:00	17.65	25.1092	24.7876	24.7544	24.6516	25.2332	2.20551	0	31.7852	0	302	35.26
08/02 01:20:00	17.6	25.1083	24.7768	24.7431	24.6403	25.2203	2.2074	0	31.7852	0	303	35.26
08/02 01:25:00	17.55	25.1075	24.766	24.7316	24.6291	25.2072	2.20878	0	31.7852	0	304	35.26
08/02 01:30:00	17.5	25.1066	24.7551	24.7202	24.6178	25.1942	2.20784	0	31.7852	0	305	35.26
08/02 01:35:00	17.45	25.1057	24.7442	24.7087	24.6064	25.1811	2.20553	0	31.7852	0	306	35.26
08/02 01:40:00	17.4	25.1049	24.7333	24.6972	24.5951	25.168	2.20374	0	31.7852	0	307	35.26
08/02 01:45:00	17.35	25.104	24.7224	24.6857	24.5838	25.1549	2.20243	0	31.7852	0	308	35.26
08/02 01:50:00	17.3	25.1031	24.7114	24.6741	24.5725	25.1418	2.20158	0	31.7852	0	309	35.26
08/02 01:55:00	17.25	25.1022	24.7004	24.6626	24.5611	25.1287	2.20117	0	31.7852	0	310	35.26
08/02 02:00:00	17.2	25.1013	24.6895	24.651	24.5498	25.1156	2.20117	0	31.7852	0	311	35.26
08/02 02:05:00	17.25	23.883	22.7895	22.403	22.7675	22.5277	372871	0	20.78	0	312	30.49
08/02 02:10:00	17.3	22.6888	21.4539	20.9594	21.4834	20.9679	380702	0	20.78	0	313	30.49
08/02 02:15:00	17.35	22.2544	21.1141	20.7954	21.1446	20.797	378876	0	20.78	0	314	30.49
08/02 02:20:00	17.4	22.0016	20.911	20.7844	20.9438	20.7844	378042	0	20.78	0	315	30.49
08/02 02:25:00	17.45	21.8784	20.8008	20.7832	20.8309	20.783	375914	0	20.78	0	316	30.49
08/02 02:30:00	17.5	21.7829	20.7849	20.7823	20.7887	20.7821	370259	0	20.78	0	317	30.49
08/02 02:35:00	17.55	21.7071	20.7822	20.7817	20.7828	20.7815	363895	0	20.78	0	318	30.49
08/02 02:40:00	17.6	21.643	20.7815	20.7813	20.7817	20.7812	358611	0	20.78	0	319	30.49
08/02 02:45:00	17.65	21.5863	20.7812	20.7811	20.7813	20.781	354238	0	20.78	0	320	30.49
08/02 02:50:00	17.7	21.5351	20.781	20.781	20.7811	20.7809	350587	0	20.78	0	321	30.49
08/02 02:55:00	17.75	21.4881	20.7809	20.7809	20.7809	20.7808	347479	0	20.78	0	322	30.49
08/02 03:00:00	17.8	21.4443	20.7808	20.7808	20.7809	20.7808	344855	0	20.78	0	323	30.49
08/02 03:05:00	17.75	21.4134	20.4644	20.3347	20.4923	20.3368	390974	0	20.311	0	324	27.85
08/02 03:10:00	17.7	21.3629	20.3224	20.3127	20.3264	20.3128	379087	0	20.311	0	325	27.85
08/02 03:15:00	17.65	21.3225	20.3134	20.3122	20.3139	20.3122	370108	0	20.311	0	326	27.85
08/02 03:20:00	17.6	21.2864	20.3121	20.3119	20.3122	20.3119	361956	0	20.311	0	327	27.85
08/02 03:25:00	17.55	21.2509	20.3119	20.3118	20.3119	20.3118	354687	0	20.311	0	328	27.85
08/02 03:30:00	17.5	21.2168	20.3118	20.3118	20.3118	20.3118	347788	0	20.311	0	329	27.85
08/02 03:35:00	17.45	21.1837	20.3117	20.3117	20.3117	20.3117	341300	0	20.311	0	330	27.85
08/02 03:40:00	17.4	21.1518	20.3117	20.3117	20.3117	20.3117	335201	0	20.311	0	331	27.85
08/02 03:45:00	17.35	21.1208	20.3117	20.3117	20.3117	20.3117	329434	0	20.311	0	332	27.85
08/02 03:50:00	17.3	21.0908	20.3116	20.3117	20.3117	20.3117	323986	0	20.311	0	333	27.85
08/02 03:55:00	17.25	21.0616	20.3116	20.3116	20.3116	20.3116	318816	0	20.311	0	334	27.85
08/02 04:00:00	17.2	21.0332	20.3116	20.3116	20.3116	20.3116	313911	0	20.311	0	335	27.85
08/02 04:05:00	17.2917	21.0142	20.0217	19.7713	20.0482	19.7181	375273	0	19.1691	0	336	27.67
08/02 04:10:00	17.3833	20.9804	19.8155	19.4337	19.8556	19.367	380003	0	19.1691	0	337	27.67
08/02 04:15:00	17.475	20.9527	19.7499	19.3427	19.7929	19.2732	383431	0	19.1691	0	338	27.67
08/02 04:20:00	17.5667	20.9245	19.7024	19.2824	19.7471	19.2109	386387	0	19.1691	0	339	27.67
08/02 04:25:00	17.6583	20.8957	19.6607	19.2317	19.7068	19.1772	388635	0	19.1691	0	340	27.67
08/02 04:30:00	17.75	20.8669	19.6224	19.1866	19.6697	19.1712	390150	0	19.1691	0	341	27.67
08/02 04:35:00	17.8417	20.8384	19.5861	19.1726	19.6335	19.1701	390842	0	19.1691	0	342	27.67
08/02 04:40:00	17.9333	20.8108	19.5531	19.1703	19.6004	19.1699	391252	0	19.1691	0	343	27.67
08/02 04:45:00	18.025	20.7841	19.5213	19.1699	19.5688	19.1699	391783	0	19.1691	0	344	27.67
08/02 04:50:00	18.1167	20.758	19.4903	19.1699	19.5383	19.1699	392470	0	19.1691	0	345	27.67
08/02 04:55:00	18.2083	20.7354	19.481	19.2422	19.5613	19.1699	397504	0	19.1691	0	346	27.67
08/02 05:00:00	18.3	20.7101	19.465	19.3894	19.587	19.1699	400545	0	19.1691	0	347	27.67
08/02 05:05:00	18.3	20.7169	20.1461	20.1713	20.1846	20.0584	295143	0	20.2398	0	348	31.88
08/02 05:10:00	18.3	20.6727	20.2399	20.2399	20.2399	20.2398	319313	0	20.2398	0	349	31.88
08/02 05:15:00	18.3	20.6545	20.24	20.24	20.24	20.2399	320686	0	20.2398	0	350	31.88
08/02 05:20:00	18.3	20.6347	20.2401	20.2402	20.2402	20.2401	322302	0	20.2398	0	351	31.88
08/02 05:25:00	18.3	20.6157	20.2403	20.2403	20.2403	20.2403	323694	0	20.2398	0	352	31.88
08/02 05:30:00	18.3	20.5967	20.2403	20.2404	20.2404	20.2404	325052	0	20.2398	0	353	31.88
08/02 05:35:00	18.3	20.5777	20.2404	20.2405	20.2405	20.2404	326568	0	20.2398	0	354	31.88
08/02 05:40:00	18.3	20.5585	20.2405	20.2406	20.2405	20.2405	328202	0	20.2398	0	355	31.88
08/02 05:45:00	18.3	20.5389	20.2405	20.2406	20.2406	20.2406	329716	0	20.2398	0	356	31.88
08/02 05:50:00	18.3	20.5193	20.2406	20.2407	20.2406	20.2406	331159	0	20.2398	0	357	31.88
08/02 05:55:00	18.3	20.4997	20.2406	20.2407	20.2406	20.2406	332645	0	20.2398	0	358	31.88
08/02 06:00:00	18.3	20.4803	20.2406	20.2407	20.2406	20.2407	334188	0	20.2398	0	359	31.88
08/02 06:05:00	18.5833	21.1415	21.0128	21.3906	21.0923	21.0785	8.38946	0	31.8164	0	360	37.61
08/02 06:10:00	18.8667	21.8855	21.7965	22.5295	21.9402	21.9167	8.36791	0	31.8164	0	361	37.61
08/02 06:15:00	19.15	22.3194	22.2173	23.1566	22.3801	22.3612	8.36431	0	31.8164	0	362	37.61
08/02 06:20:00	19.4333	22.5799	22.4675	23.553	22.6377	22.6238	8.37922	0	31.8164	0	363	37.61
08/02 06:25:00	19.7167	22.7645	22.6515	23.8654	22.8259	22.8163	8.38702	0	31.8164	0	364	37.61
08/02 06:30:00	20	22.9309	22.8305	24.1873	23.0077	23.0032	8.36863	0	31.8164	0	365	37.61
08/02 06:35:00	20.2833	23.0308	22.9525	24.4117	23.1308	23.1301	8.36621	0	31.8164	0	366	37.61
08/02 06:40:00	20.5667	23.1114	23.0623	24.6141	23.2399	23.2434	8.38232	0	31.8164	0	367	37.61
08/02 06:45:00	20.85	23.1784	23.1639	24.802	23.3392	23.3476	8.38345	0	31.8164	0	368	37.61
08/02 06:50:00	21.1333	23.2354	23.26	24.9803	23.4308	23.4455	8.36774	0	31.8164	0	369	37.61
08/02 06:55:00	21.4167	23.2851	23.3521	25.1521	23.5162	23.5388	8.367	0	31.8164	0	370	37.61
08/02 07:00:00	21.7	23.3296	23.4412	25.3178	23.5965	23.6287	8.38449	0	31.8164	0	371	37.61
08/02 07:05:00	21.8833	23.75	23.8974	25.8277	24.0466	24.0867	15.4294	1	31.7954	5241.98	372	48.78
08/02 07:10:00	22.0667	24.3396	24.4907	26.4883	24.6288	24.677	15.4204	1	31.7954	9992.09	373	48.78
08/02 07:15:00	22.25	24.7489	24.905	26.917	25.0243	25.0824	53144.5	1	31.7954	14196.9	374	48.78
08/02 07:20:00	22.4333	25.0946	25.2613	27.2919	25.3594	25.4316	104907	1	31.7954	18379.7	375	48.78
08/02 07:25:00	22.6167	25.2861	25.4727	27.5319	25.5558	25.6402	102336	1	31.7954	21023.1	376	48.78
08/02 07:30:00	22.8	25.4337	25.6526	27.7423	25.7208	25.8149	99985.2	1	31.7954	23274.6	377	48.78
08/02 07:35:00	22.9833	25.5534	25.8141	27.93	25.8661	25.9686	97941.6	1	31.7954	25259.9	378	48.78
08/02 07:40:00	23.1667	25.6546	25.9637	28.1013	25.9985	26.1084	96128	1	31.7954	27065.2	379	48.78
08/02 07:45:00	23.35	25.7433	26.105	28.2607	26.1222	26.2387	15.4337	1	31.7954	28749.4	380	48.78
08/02 07:50:00	23.5333	25.8231	26.2398	28.4107	26.2394	26.3621	94518.5	1	31.7954	30346.8	381	48.78
08/02 07:55:00	23.7167	25.8961	26.3693	28.5526	26.3515	26.48	93057.1	1	31.7954	31879.9	382	48.78
08/02 08:00:00	23.9	25.964	26.4944	28.6874	26.4594	26.5934	91699.8	1	31.7954	33362.9	383	48.78
08/02 08:05:00	24.1333	24.8981	24.6	25.9471	24.6407	24.3694	426720	1	23.9283	13180.3	384	59.14
08/02 08:10:00	24.3667	23.9487	23.9355	24.015	23.9359	23.934	349460	1	23.9283	4828.78	385	59.14
08/02 08:15:00	24.6	23.9298	23.9317	23.9335	23.9318	23.9319	305407	1	23.9283	4704.76	386	59.14
08/02 08:20:00	24.8333	23.93	23.9317	23.9329	23.9318	23.9319	285712	1	23.9283	4705.01	387	59.14
08/02 08:25:00	25.0667	23.93	23.9315	23.9321	23.9316	23.9316	288103	1	23.9283	4704.43	388	59.14
08/02 08:30:00	25.3	23.93	23.9313	23.9315	23.9314	23.9314	290103	1	23.9283	4704.01	389	59.14
08/02 08:35:00	25.5333	23.93	23.9312	23.931	23.9312	23.9313	292328	1	23.9283	4703.7	390	59.14
08/02 08:40:00	25.7667	23.93	23.9311	23.9307	23.9311	23.9311	294739	1	23.9283	4703.49	391	59.14
08/02 08:45:00	26	23.9301	23.931	23.9305	23.931	23.931	297312	1	23.9283	4703.34	392	59.14
08/02 08:50:00	26.2333	23.9301	23.9309	23.9304	23.9309	23.9309	300013	1	23.9283	4703.23	393	59.14
08/02 08:55:00	26.4667	23.9301	23.9308	23.9303	23.9308	23.9308	302811	1	23.9283	4703.16	394	59.14
08/02 09:00:00	26.7	23.9301	23.9307	23.9302	23.9307	23.9307	305683	1	23.9283	4703.12	395	59.14
08/02 09:05:00	26.7417	23.8643	23.867	23.8699	23.867	23.8673	312999	1	23.8592	4285.48	396	72.77
08/02 09:10:00	26.7833	23.8613	23.8621	23.8622	23.862	23.862	313891	1	23.8592	4261.95	397	72.77
08/02 09:15:00	26.825	23.8612	23.8616	23.8612	23.8615	23.8615	313895	1	23.8592	4260.2	398	72.77
08/02 09:20:00	26.8667	23.8612	23.8615	23.861	23.8614	23.8614	314280	1	23.8592	4259.98	399	72.77
08/02 09:25:00	26.9083	23.8612	23.8614	23.861	23.8614	23.8613	314557	1	23.8592	4259.89	400	72.77
08/02 09:30:00	26.95	23.8612	23.8614	23.8609	23.8613	23.8613	314763	1	23.8592	4259.82	401	72.77
08/02 09:35:00	26.9917	23.8612	23.8613	23.8609	23.8613	23.8612	314888	1	23.8592	4259.77	402	72.77
08/02 09:40:00	27.0333	23.8612	23.8613	23.8609	23.8612	23.8612	314952	1	23.8592	4259.71	403	72.77
08/02 09:45:00	27.075	23.8612	23.8612	23.8609	23.8612	23.8612	314979	1	23.8592	4259.66	404	72.77
08/02 09:50:00	27.1167	23.8612	23.8612	23.8609	23.8612	23.8611	314979	1	23.8592	4259.62	405	72.77
08/02 09:55:00	27.1583	23.8612	23.8612	23.8609	23.8611	23.8611	314955	1	23.8592	4259.58	406	72.77
08/02 10:00:00	27.2	23.8612	23.8611	23.8608	23.8611	23.8611	314912	1	23.8592	4259.54	407	72.77
08/02 10:05:00	27.3417	23.4041	23.386	23.3913	23.3853	23.3862	400672	0.8	23.365	1486.02	408	85.48
08/02 10:10:00	27.4833	23.3674	23.3672	23.3671	23.3672	23.3672	349746	0.8	23.365	1383.48	409	85.48
08/02 10:15:00	27.625	23.3672	23.3669	23.3666	23.3669	23.3669	348938	0.8	23.365	1382.72	410	85.48
08/02 10:20:00	27.7667	23.3671	23.3667	23.3664	23.3667	23.3667	347857	0.8	23.365	1382.28	411	85.48
08/02 10:25:00	27.9083	23.367	23.3666	23.3663	23.3666	23.3666	348131	0.8	23.365	1382.01	412	85.48
08/02 10:30:00	28.05	23.3669	23.3665	23.3663	23.3665	23.3665	348798	0.8	23.365	1381.8	413	85.48
08/02 10:35:00	28.1917	23.3669	23.3665	23.3662	23.3665	23.3664	349795	0.8	23.365	1381.63	414	85.48
08/02 10:40:00	28.3333	23.3668	23.3664	23.3662	23.3664	23.3664	351041	0.8	23.365	1381.5	415	85.48
08/02 10:45:00	28.475	23.3668	23.3664	23.3662	23.3664	23.3664	352489	0.8	23.365	1381.39	416	85.48
08/02 10:50:00	28.6167	23.3667	23.3664	23.3662	23.3664	23.3664	354097	0.8	23.365	1381.31	417	85.48
08/02 10:55:00	28.7583	23.3667	23.3664	23.3662	23.3664	23.3664	355831	0.8	23.365	1381.23	418	85.48
08/02 11:00:00	28.9	23.3667	23.3664	23.3662	23.3664	23.3664	357665	0.8	23.365	1381.17	419	85.48
08/02 11:05:00	28.9	22.8635	22.8724	22.7959	22.8554	22.7933	461797	0.4	22.7645	116.772	420	97.35
08/02 11:10:00	28.9	22.7667	22.7678	22.7665	22.7673	22.7665	393963	0.4	22.7645	65.4746	421	97.35
08/02 11:15:00	28.9	22.766	22.7657	22.7654	22.7657	22.7656	379639	0.4	22.7645	65.0312	422	97.35
08/02 11:20:00	28.9	22.7659	22.7654	22.7652	22.7654	22.7654	373009	0.4	22.7645	64.9339	423	97.35
08/02 11:25:00	28.9	22.7658	22.7653	22.7651	22.7653	22.7653	367501	0.4	22.7645	64.884	424	97.35
08/02 11:30:00	28.9	22.7657	22.7652	22.7651	22.7652	22.7652	362893	0.4	22.7645	64.8496	425	97.35
08/02 11:35:00	28.9	22.7657	22.7652	22.7651	22.7652	22.7652	358890	0.4	22.7645	64.8239	426	97.35
08/02 11:40:00	28.9	22.7656	22.7652	22.7651	22.7652	22.7652	355357	0.4	22.7645	64.804	427	97.35
08/02 11:45:00	28.9	22.7656	22.7652	22.7651	22.7652	22.7652	353695	0.4	22.7645	64.7924	428	97.35
08/02 11:50:00	28.9	22.7655	22.7652	22.7652	22.7652	22.7652	352287	0.4	22.7645	64.788	429	97.35
08/02 11:55:00	28.9	22.7655	22.7652	22.7652	22.7652	22.7652	350404	0.4	22.7645	64.7812	430	97.35
08/02 12:00:00	28.9	22.7655	22.7652	22.7652	22.7652	22.7652	348619	0.4	22.7645	64.7737	431	97.35
08/02 12:05:00	28.9417	23.3641	23.8855	23.8776	23.8203	23.8278	281392	0.8	24.1203	1983.99	432	106.13
08/02 12:10:00	28.9833	24.0552	24.1109	24.1106	24.1102	24.1095	276892	0.8	24.1203	4546.69	433	106.13
08/02 12:15:00	29.025	24.1207	24.1204	24.1204	24.1204	24.1204	282800	0.8	24.1203	4830.44	434	106.13
08/02 12:20:00	29.0667	24.1209	24.1207	24.1207	24.1207	24.1207	286049	0.8	24.1203	4831.69	435	106.13
08/02 12:25:00	29.1083	24.121	24.1209	24.121	24.1209	24.1209	289351	0.8	24.1203	4832.48	436	106.13
08/02 12:30:00	29.15	24.1211	24.1211	24.1211	24.1211	24.121	292544	0.8	24.1203	4833.16	437	106.13
08/02 12:35:00	29.1917	24.1211	24.1213	24.1213	24.1212	24.1212	295628	0.8	24.1203	4833.77	438	106.13
08/02 12:40:00	29.2333	24.1212	24.1214	24.1214	24.1213	24.1213	298621	0.8	24.1203	4834.3	439	106.13
08/02 12:45:00	29.275	24.1213	24.1215	24.1215	24.1214	24.1214	301538	0.8	24.1203	4834.77	440	106.13
08/02 12:50:00	29.3167	24.1214	24.1215	24.1215	24.1215	24.1215	304382	0.8	24.1203	4835.19	441	106.13
08/02 12:55:00	29.3583	24.1214	24.1216	24.1216	24.1215	24.1216	307167	0.8	24.1203	4835.56	442	106.13
08/02 13:00:00	29.4	24.1215	24.1216	24.1216	24.1216	24.1216	309892	0.8	24.1203	4835.88	443	106.13
08/02 13:05:00	29.4	24.1218	24.1218	24.1218	24.1218	24.1218	320723	1	24.1203	6046.76	444	116.69
08/02 13:10:00	29.4	24.1219	24.122	24.122	24.1219	24.122	327447	1	24.1203	6047.79	445	116.69
08/02 13:15:00	29.4	24.1219	24.122	24.122	24.122	24.1221	331222	1	24.1203	6048.18	446	116.69
08/02 13:20:00	29.4	24.122	24.122	24.122	24.122	24.1221	334484	1	24.1203	6048.46	447	116.69
08/02 13:25:00	29.4	24.122	24.122	24.1221	24.122	24.1221	337358	1	24.1203	6048.69	448	116.69
08/02 13:30:00	29.4	24.1221	24.122	24.1221	24.1221	24.1222	339962	1	24.1203	6048.88	449	116.69
08/02 13:35:00	29.4	24.1221	24.1221	24.1221	24.1221	24.1222	342351	1	24.1203	6049.04	450	116.69
08/02 13:40:00	29.4	24.1221	24.122	24.1221	24.1221	24.1222	344570	1	24.1203	6049.16	451	116.69
08/02 13:45:00	29.4	24.1221	24.122	24.1221	24.1221	24.1222	346663	1	24.1203	6049.27	452	116.69
08/02 13:50:00	29.4	24.1221	24.122	24.1221	24.1221	24.1222	348647	1	24.1203	6049.35	453	116.69
08/02 13:55:00	29.4	24.1222	24.122	24.1221	24.1221	24.1222	350546	1	24.1203	6049.42	454	116.69
08/02 14:00:00	29.4	24.1222	24.122	24.122	24.1221	24.1222	352373	1	24.1203	6049.48	455	116.69
08/02 14:05:00	29.4	24.1222	24.122	24.122	24.1221	24.1221	353942	1	24.1203	6049.54	456	128.9
08/02 14:10:00	29.4	24.1222	24.122	24.122	24.1221	24.1221	355360	1	24.1203	6049.59	457	128.9
08/02 14:15:00	29.4	24.1222	24.122	24.122	24.1221	24.1221	356682	1	24.1203	6049.63	458	128.9
08/02 14:20:00	29.4	24.1222	24.122	24.122	24.1221	24.1221	357931	1	24.1203	6049.65	459	128.9
08/02 14:25:00	29.4	24.1222	24.122	24.122	24.1221	24.1221	359114	1	24.1203	6049.67	460	128.9
08/02 14:30:00	29.4	24.1222	24.122	24.122	24.1221	24.1221	360238	1	24.1203	6049.68	461	128.9
08/02 14:35:00	29.4	24.1222	24.122	24.122	24.1221	24.1221	361274	1	24.1203	6049.68	462	128.9
08/02 14:40:00	29.4	24.1222	24.122	24.122	24.1221	24.1221	362231	1	24.1203	6049.68	463	128.9
08/02 14:45:00	29.4	24.1222	24.122	24.122	24.1221	24.1221	363127	1	24.1203	6049.67	464	128.9
08/02 14:50:00	29.4	24.1222	24.122	24.122	24.122	24.1221	363967	1	24.1203	6049.65	465	128.9
08/02 14:55:00	29.4	24.1222	24.122	24.122	24.122	24.1221	364753	1	24.1203	6049.63	466	128.9
08/02 15:00:00	29.4	24.1222	24.122	24.122	24.122	24.1221	365489	1	24.1203	6049.61	467	128.9
08/02 15:05:00	29.4	24.1222	24.122	24.122	24.122	24.122	366603	1	24.1203	6049.56	468	139
08/02 15:10:00	29.4	24.1222	24.122	24.122	24.122	24.122	367936	1	24.1203	6049.53	469	139
08/02 15:15:00	29.4	24.1222	24.122	24.122	24.122	24.122	369252	1	24.1203	6049.53	470	139
08/02 15:20:00	29.4	24.1222	24.122	24.122	24.122	24.122	370542	1	24.1203	6049.53	471	139
08/02 15:25:00	29.4	24.1222	24.122	24.122	24.122	24.122	371834	1	24.1203	6049.52	472	139
08/02 15:30:00	29.4	24.1222	24.122	24.122	24.122	24.122	373108	1	24.1203	6049.52	473	139
08/02 15:35:00	29.4	24.1222	24.1219	24.122	24.122	24.122	374137	1	24.1203	6049.49	474	139
08/02 15:40:00	29.4	24.1222	24.1219	24.122	24.122	24.122	375111	1	24.1203	6049.46	475	139
08/02 15:45:00	29.4	24.1222	24.1219	24.122	24.122	24.122	376117	1	24.1203	6049.44	476	139
08/02 15:50:00	29.4	24.1222	24.122	24.122	24.122	24.122	377999	1	24.1203	6049.5	477	139
08/02 15:55:00	29.4	24.1222	24.122	24.122	24.122	24.122	380241	1	24.1203	6049.58	478	139
08/02 16:00:00	29.4	24.1222	24.1221	24.122	24.122	24.122	381905	1	24.1203	6049.61	479	139
08/02 16:05:00	29.3583	24.1222	24.1221	24.122	24.122	24.122	382748	1	24.1203	6049.62	480	143.87
08/02 16:10:00	29.3167	24.1222	24.122	24.122	24.122	24.122	383111	1	24.1203	6049.59	481	143.87
08/02 16:15:00	29.275	24.1222	24.122	24.122	24.122	24.122	383389	1	24.1203	6049.5	482	143.87
08/02 16:20:00	29.2333	24.1222	24.122	24.122	24.122	24.122	383578	1	24.1203	6049.42	483	143.87
08/02 16:25:00	29.1917	24.1222	24.122	24.122	24.122	24.122	383641	1	24.1203	6049.35	484	143.87
08/02 16:30:00	29.15	24.1222	24.122	24.122	24.122	24.122	383630	1	24.1203	6049.28	485	143.87
08/02 16:35:00	29.1083	24.1222	24.122	24.122	24.122	24.122	383493	1	24.1203	6049.21	486	143.87
08/02 16:40:00	29.0667	24.1221	24.122	24.122	24.122	24.122	383331	1	24.1203	6049.14	487	143.87
08/02 16:45:00	29.025	24.1221	24.122	24.122	24.122	24.122	383175	1	24.1203	6049.09	488	143.87
08/02 16:50:00	28.9833	24.1221	24.122	24.122	24.122	24.122	382996	1	24.1203	6049.04	489	143.87
08/02 16:55:00	28.9417	24.1221	24.122	24.122	24.122	24.122	382788	1	24.1203	6048.99	490	143.87
08/02 17:00:00	28.9	24.1221	24.122	24.122	24.122	24.1219	382547	1	24.1203	6048.95	491	143.87
08/02 17:05:00	28.7583	24.1215	24.1216	24.1216	24.1216	24.1216	351097	0.5	24.1203	3022.52	492	131.63
08/02 17:10:00	28.6167	24.1213	24.1212	24.1212	24.1213	24.121	336296	0.5	24.1203	3021.56	493	131.63
08/02 17:15:00	28.475	24.1213	24.1212	24.1212	24.1212	24.121	332624	0.5	24.1203	3021.41	494	131.63
08/02 17:20:00	28.3333	24.1213	24.1212	24.1212	24.1212	24.1211	329684	0.5	24.1203	3021.34	495	131.63
08/02 17:25:00	28.1917	24.1212	24.1212	24.1212	24.1212	24.1211	327405	0.5	24.1203	3021.29	496	131.63
08/02 17:30:00	28.05	24.1212	24.1212	24.1212	24.1212	24.1211	325548	0.5	24.1203	3021.26	497	131.63
08/02 17:35:00	27.9083	24.1212	24.1212	24.1212	24.1212	24.1211	323896	0.5	24.1203	3021.23	498	131.63
08/02 17:40:00	27.7667	24.1212	24.1212	24.1212	24.1212	24.1212	322372	0.5	24.1203	3021.21	499	131.63
08/02 17:45:00	27.625	24.1212	24.1212	24.1212	24.1212	24.1212	320956	0.5	24.1203	3021.19	500	131.63
08/02 17:50:00	27.4833	24.1212	24.1212	24.1212	24.1212	24.1212	319613	0.5	24.1203	3021.17	501	131.63
08/02 17:55:00	27.3417	24.1212	24.1212	24.1212	24.1212	24.1212	318165	0.5	24.1203	3021.16	502	131.63
08/02 18:00:00	27.2	24.1212	24.1212	24.1212	24.1212	24.1212	316778	0.5	24.1203	3021.14	503	131.63
08/02 18:05:00	27.1083	24.1209	24.1211	24.1212	24.1212	24.1212	287558	0	24.1203	0	504	113.09
08/02 18:10:00	27.0167	24.1208	24.1211	24.1211	24.1212	24.1212	283525	0	24.1203	0	505	113.09
08/02 18:15:00	26.925	24.1207	24.1212	24.1212	24.1212	24.1213	279347	0	24.1203	0	506	113.09
08/02 18:20:00	26.8333	24.1207	24.1212	24.1213	24.1213	24.1214	275600	0	24.1203	0	507	113.09
08/02 18:25:00	26.7417	24.1207	24.1213	24.1213	24.1213	24.1214	272879	0	24.1203	0	508	113.09
08/02 18:30:00	26.65	24.1207	24.1213	24.1214	24.1214	24.1215	270842	0	24.1203	0	509	113.09
08/02 18:35:00	26.5583	24.1206	24.1213	24.1214	24.1214	24.1215	269249	0	24.1203	0	510	113.09
08/02 18:40:00	26.4667	24.1206	24.1214	24.1215	24.1215	24.1215	268416	0	24.1203	0	511	113.09
08/02 18:45:00	26.375	24.1206	24.1214	24.1215	24.1215	24.1217	267499	0	24.1203	0	512	113.09
08/02 18:50:00	26.2833	24.1206	24.1214	24.1215	24.1215	24.1218	266546	0	24.1203	0	513	113.09
08/02 18:55:00	26.1917	24.1206	24.1214	24.1215	24.1215	24.1218	265594	0	24.1203	0	514	113.09
08/02 19:00:00	26.1	24.1206	24.1214	24.1215	24.1215	24.1217	264668	0	24.1203	0	515	113.09
08/02 19:05:00	25.9583	24.3221	24.6087	24.6665	24.65	24.9602	7.49016	0	31.9212	0	516	103.26
08/02 19:10:00	25.8167	24.5866	25.135	25.2449	25.1962	25.7516	7.5062	0	31.9212	0	517	103.26
08/02 19:15:00	25.675	24.7593	25.4106	25.5432	25.4605	26.0973	7.49783	0	31.9212	0	518	103.26
08/02 19:20:00	25.5333	24.8499	25.5326	25.6713	25.57	26.2208	7.48485	0	31.9212	0	519	103.26
08/02 19:25:00	25.3917	24.9165	25.606	25.7472	25.6331	26.2876	7.48711	0	31.9212	0	520	103.26
08/02 19:30:00	25.25	24.9675	25.6513	25.7936	25.668	26.3205	7.50217	0	31.9212	0	521	103.26
08/02 19:35:00	25.1083	25.0084	25.6799	25.8225	25.6861	26.3348	7.50228	0	31.9212	0	522	103.26
08/02 19:40:00	24.9667	25.0413	25.6978	25.8407	25.694	26.338	7.48745	0	31.9212	0	523	103.26
08/02 19:45:00	24.825	25.069	25.7088	25.8518	25.6954	26.335	7.48465	0	31.9212	0	524	103.26
08/02 19:50:00	24.6833	25.0923	25.715	25.858	25.6927	26.3282	7.49543	0	31.9212	0	525	103.26
08/02 19:55:00	24.5417	25.1121	25.7177	25.8606	25.6872	26.3192	7.50238	0	31.9212	0	526	103.26
08/02 20:00:00	24.4	25.1286	25.7179	25.8607	25.6798	26.3088	7.49273	0	31.9212	0	527	103.26
08/02 20:05:00	24.3083	25.1214	25.6976	25.8404	25.6524	26.2794	3.52177	0	31.9212	0	528	101.8
08/02 20:10:00	24.2167	25.1151	25.6835	25.8263	25.6318	26.2577	3.52165	0	31.9212	0	529	101.8
08/02 20:15:00	24.125	25.1105	25.6728	25.8156	25.6152	26.2403	3.52303	0	31.9212	0	530	101.8
08/02 20:20:00	24.0333	25.1072	25.6639	25.8065	25.6008	26.2252	3.52581	0	31.9212	0	531	101.8
08/02 20:25:00	23.9417	25.1048	25.6558	25.7982	25.5877	26.2116	3.52988	0	31.9212	0	532	101.8
08/02 20:30:00	23.85	25.1031	25.6481	25.79	25.5752	26.1986	3.53338	0	31.9212	0	533	101.8
08/02 20:35:00	23.7583	25.1019	25.6404	25.7818	25.5632	26.1861	3.53143	0	31.9212	0	534	101.8
08/02 20:40:00	23.6667	25.1011	25.6326	25.7735	25.5513	26.1738	3.52631	0	31.9212	0	535	101.8
08/02 20:45:00	23.575	25.1006	25.6246	25.7649	25.5395	26.1617	3.52312	0	31.9212	0	536	101.8
08/02 20:50:00	23.4833	25.1004	25.6164	25.756	25.5277	26.1497	3.52169	0	31.9212	0	537	101.8
08/02 20:55:00	23.3917	25.1002	25.6079	25.7469	25.5158	26.1377	3.52187	0	31.9212	0	538	101.8
08/02 21:00:00	23.3	25.1002	25.5992	25.7374	25.5039	26.1258	3.52354	0	31.9212	0	539	101.8
08/02 21:05:00	23.3	25.1003	25.5928	25.7303	25.4945	26.1165	2.20363	0	31.9212	0	540	95.47
08/02 21:10:00	23.3	25.1	25.5877	25.7246	25.4866	26.1086	2.20516	0	31.9212	0	541	95.47
08/02 21:15:00	23.3	25.0999	25.5833	25.7195	25.4796	26.1016	2.207	0	31.9212	0	542	95.47
08/02 21:20:00	23.3	25.0998	25.5794	25.7149	25.4732	26.0951	2.20876	0	31.9212	0	543	95.47
08/02 21:25:00	23.3	25.0998	25.5758	25.7106	25.4672	26.089	2.20818	0	31.9212	0	544	95.47
08/02 21:30:00	23.3	25.0999	25.5723	25.7064	25.4615	26.0832	2.20579	0	31.9212	0	545	95.47
08/02 21:35:00	23.3	25.1	25.569	25.7022	25.456	26.0775	2.20392	0	31.9212	0	546	95.47
08/02 21:40:00	23.3	25.1001	25.5657	25.6982	25.4507	26.072	2.20254	0	31.9212	0	547	95.47
08/02 21:45:00	23.3	25.1002	25.5624	25.6942	25.4455	26.0666	2.20163	0	31.9212	0	548	95.47
08/02 21:50:00	23.3	25.1003	25.5592	25.6902	25.4404	26.0613	2.20115	0	31.9212	0	549	95.47
08/02 21:55:00	23.3	25.1005	25.556	25.6862	25.4354	26.0561	2.20109	0	31.9212	0	550	95.47
08/02 22:00:00	23.3	25.1006	25.5528	25.6822	25.4305	26.0509	2.20142	0	31.9212	0	551	95.47
08/02 22:05:00	23.2583	25.1008	25.5486	25.6771	25.4246	26.0447	2.20212	0	31.9212	0	552	75.48
08/02 22:10:00	23.2167	25.101	25.5436	25.6713	25.4181	26.0378	2.20318	0	31.9212	0	553	75.48
08/02 22:15:00	23.175	25.1012	25.5383	25.6652	25.4112	26.0307	2.20459	0	31.9212	0	554	75.48
08/02 22:20:00	23.1333	25.1013	25.5326	25.6587	25.4041	26.0233	2.20631	0	31.9212	0	555	75.48
08/02 22:25:00	23.0917	25.1015	25.5268	25.6521	25.3968	26.0157	2.20835	0	31.9212	0	556	75.48
08/02 22:30:00	23.05	25.1017	25.5209	25.6453	25.3894	26.0081	2.20862	0	31.9212	0	557	75.48
08/02 22:35:00	23.0083	25.1018	25.5148	25.6384	25.3819	26.0004	2.20665	0	31.9212	0	558	75.48
08/02 22:40:00	22.9667	25.102	25.5086	25.6314	25.3743	25.9925	2.20459	0	31.9212	0	559	75.48
08/02 22:45:00	22.925	25.1021	25.5023	25.6243	25.3667	25.9846	2.20303	0	31.9212	0	560	75.48
08/02 22:50:00	22.8833	25.1022	25.496	25.6172	25.359	25.9767	2.20194	0	31.9212	0	561	75.48
08/02 22:55:00	22.8417	25.1023	25.4895	25.61	25.3514	25.9687	2.2013	0	31.9212	0	562	75.48
08/02 23:00:00	22.8	25.1025	25.483	25.6027	25.3436	25.9606	2.20109	0	31.9212	0	563	75.48
08/02 23:05:00	22.75	25.1026	25.4762	25.5951	25.3356	25.9522	2.20127	0	31.9212	0	564	58.11
08/02 23:10:00	22.7	25.1026	25.4691	25.5872	25.3273	25.9435	2.20184	0	31.9212	0	565	58.11
08/02 23:15:00	22.65	25.1027	25.4619	25.5792	25.3189	25.9347	2.20277	0	31.9212	0	566	58.11
08/02 23:20:00	22.6	25.1028	25.4544	25.571	25.3103	25.9258	2.20405	0	31.9212	0	567	58.11
08/02 23:25:00	22.55	25.1029	25.4469	25.5627	25.3016	25.9167	2.20566	0	31.9212	0	568	58.11
08/02 23:30:00	22.5	25.1029	25.4392	25.5543	25.293	25.9075	2.20758	0	31.9212	0	569	58.11
08/02 23:35:00	22.45	25.103	25.4314	25.5458	25.2842	25.8983	2.20872	0	31.9212	0	570	58.11
08/02 23:40:00	22.4	25.103	25.4236	25.5372	25.2755	25.8889	2.20757	0	31.9212	0	571	58.11
08/02 23:45:00	22.35	25.103	25.4156	25.5285	25.2668	25.8795	2.20531	0	31.9212	0	572	58.11
08/02 23:50:00	22.3	25.103	25.4076	25.5198	25.258	25.87	2.20357	0	31.9212	0	573	58.11
08/02 23:55:00	22.25	25.103	25.3994	25.511	25.2493	25.8605	2.20231	0	31.9212	0	574	58.11
08/02 24:00:00	22.2	25.103	25.3912	25.5021	25.2405	25.8509	2.20151	0	31.9212	0	575	58.11
08/03 00:05:00	22.1583	25.103	25.3829	25.4933	25.2318	25.8413	2.20028	0	31.3585	0	576	50.81
08/03 00:10:00	22.1167	25.103	25.3746	25.4844	25.2231	25.8317	2.20032	0	31.3585	0	577	50.81
08/03 00:15:00	22.075	25.1029	25.3662	25.4754	25.2144	25.8221	2.20075	0	31.3585	0	578	50.81
08/03 00:20:00	22.0333	25.1029	25.3577	25.4664	25.2057	25.8124	2.20155	0	31.3585	0	579	50.81
08/03 00:25:00	21.9917	25.1028	25.3492	25.4574	25.1971	25.8027	2.2027	0	31.3585	0	580	50.81
08/03 00:30:00	21.95	25.1028	25.3408	25.4482	25.1884	25.793	2.20418	0	31.3585	0	581	50.81
08/03 00:35:00	21.9083	25.1027	25.3323	25.439	25.1797	25.7832	2.20599	0	31.3585	0	582	50.81
08/03 00:40:00	21.8667	25.1026	25.3238	25.4297	25.171	25.7733	2.20802	0	31.3585	0	583	50.81
08/03 00:45:00	21.825	25.1025	25.3153	25.4203	25.1623	25.7634	2.20768	0	31.3585	0	584	50.81
08/03 00:50:00	21.7833	25.1024	25.3067	25.4108	25.1535	25.7534	2.20523	0	31.3585	0	585	50.81
08/03 00:55:00	21.7417	25.1023	25.2982	25.4013	25.1448	25.7434	2.2033	0	31.3585	0	586	50.81
08/03 01:00:00	21.7	25.1022	25.2897	25.3919	25.1361	25.7334	2.20186	0	31.3585	0	587	50.81
08/03 01:05:00	21.7	25.102	25.2824	25.3832	25.1286	25.7246	2.20089	0	30.2446	0	588	38.66
08/03 01:10:00	21.7	25.1019	25.2758	25.3756	25.1218	25.7164	2.20037	0	30.2446	0	589	38.66
08/03 01:15:00	21.7	25.1017	25.2698	25.3685	25.1154	25.7087	2.20025	0	30.2446	0	590	38.66
08/03 01:20:00	21.7	25.1016	25.264	25.3617	25.1094	25.7013	2.20054	0	30.2446	0	591	38.66
08/03 01:25:00	21.7	25.1014	25.2584	25.3553	25.1036	25.694	2.2012	0	30.2446	0	592	38.66
08/03 01:30:00	21.7	25.1013	25.253	25.349	25.098	25.6869	2.20222	0	30.2446	0	593	38.66
08/03 01:35:00	21.7	25.1011	25.2477	25.3429	25.0924	25.6798	2.20358	0	30.2446	0	594	38.66
08/03 01:40:00	21.7	25.1009	25.2426	25.3369	25.087	25.6729	2.20527	0	30.2446	0	595	38.66
08/03 01:45:00	21.7	25.1008	25.2375	25.331	25.0817	25.6661	2.20727	0	30.2446	0	596	38.66
08/03 01:50:00	21.7	25.1006	25.2325	25.3252	25.0764	25.6593	2.20782	0	30.2446	0	597	38.66
08/03 01:55:00	21.7	25.1004	25.2275	25.3194	25.0713	25.6525	2.20611	0	30.2446	0	598	38.66
08/03 02:00:00	21.7	25.1003	25.2226	25.3137	25.0661	25.6458	2.20399	0	30.2446	0	599	38.66
08/03 02:05:00	21.65	25.1001	25.2164	25.3067	25.0597	25.6379	2.20237	0	30.5955	0	600	33.27
08/03 02:10:00	21.6	25.0999	25.2096	25.299	25.0526	25.6291	2.20122	0	30.5955	0	601	33.27
08/03 02:15:00	21.55	25.0998	25.2022	25.2907	25.0451	25.62	2.20053	0	30.5955	0	602	33.27
08/03 02:20:00	21.5	25.0996	25.1946	25.2822	25.0372	25.6105	2.20026	0	30.5955	0	603	33.27
08/03 02:25:00	21.45	25.0994	25.1868	25.2734	25.0292	25.6008	2.2004	0	30.5955	0	604	33.27
08/03 02:30:00	21.4	25.0993	25.1788	25.2645	25.021	25.5909	2.20092	0	30.5955	0	605	33.27
08/03 02:35:00	21.35	25.0991	25.1707	25.2555	25.0128	25.5809	2.20181	0	30.5955	0	606	33.27
08/03 02:40:00	21.3	25.0989	25.1626	25.2464	25.0044	25.5708	2.20304	0	30.5955	0	607	33.27
08/03 02:45:00	21.25	25.0987	25.1543	25.2372	24.996	25.5606	2.2046	0	30.5955	0	608	33.27
08/03 02:50:00	21.2	25.0985	25.146	25.228	24.9875	25.5503	2.20648	0	30.5955	0	609	33.27
08/03 02:55:00	21.15	25.0983	25.1377	25.2187	24.979	25.5398	2.20794	0	30.5955	0	610	33.27
08/03 03:00:00	21.1	25.098	25.1293	25.2094	24.9704	25.5292	2.20707	0	30.5955	0	611	33.27
08/03 03:05:00	21.15	23.9126	23.1595	22.9439	23.1251	22.9738	433185	0	22.1177	0	612	30.39
08/03 03:10:00	21.2	22.7012	22.1465	22.1427	22.1444	22.1461	429213	0	22.1177	0	613	30.39
08/03 03:15:00	21.25	22.256	22.1246	22.1246	22.1243	22.1251	424028	0	22.1177	0	614	30.39
08/03 03:20:00	21.3	22.1241	22.1249	22.1249	22.1248	22.125	396138	0	22.1177	0	615	30.39
08/03 03:25:00	21.35	22.119	22.1235	22.1235	22.1235	22.1234	371445	0	22.1177	0	616	30.39
08/03 03:30:00	21.4	22.1185	22.1223	22.1223	22.1224	22.1222	356646	0	22.1177	0	617	30.39
08/03 03:35:00	21.45	22.1183	22.1215	22.1214	22.1215	22.1213	345812	0	22.1177	0	618	30.39
08/03 03:40:00	21.5	22.1182	22.1209	22.1208	22.1209	22.1206	336934	0	22.1177	0	619	30.39
08/03 03:45:00	21.55	22.1181	22.1204	22.1203	22.1205	22.1202	329434	0	22.1177	0	620	30.39
08/03 03:50:00	21.6	22.118	22.1201	22.12	22.1201	22.1198	322928	0	22.1177	0	621	30.39
08/03 03:55:00	21.65	22.1179	22.1198	22.1197	22.1199	22.1196	317294	0	22.1177	0	622	30.39
08/03 04:00:00	21.7	22.1179	22.1196	22.1195	22.1196	22.1194	312351	0	22.1177	0	623	30.39
08/03 04:05:00	21.7	21.9109	21.4661	21.2325	21.4924	21.1404	477323	0	16.2665	0	624	30.02
08/03 04:10:00	21.7	21.6706	20.9404	20.5845	20.976	20.4627	525847	0	16.2665	0	625	30.02
08/03 04:15:00	21.7	21.5912	20.8202	20.4477	20.8568	20.3216	543144	0	16.2665	0	626	30.02
08/03 04:20:00	21.7	21.5362	20.7445	20.3639	20.7816	20.2354	551593	0	16.2665	0	627	30.02
08/03 04:25:00	21.7	21.4926	20.6847	20.298	20.7225	20.1669	557137	0	16.2665	0	628	30.02
08/03 04:30:00	21.7	21.4551	20.6336	20.2421	20.6721	20.1087	561402	0	16.2665	0	629	30.02
08/03 04:35:00	21.7	21.4216	20.5879	20.1924	20.6269	20.0569	564985	0	16.2665	0	630	30.02
08/03 04:40:00	21.7	21.391	20.5463	20.1476	20.5859	20.0103	568169	0	16.2665	0	631	30.02
08/03 04:45:00	21.7	21.3625	20.5079	20.1064	20.548	19.9675	571117	0	16.2665	0	632	30.02
08/03 04:50:00	21.7	21.3357	20.4723	20.0685	20.5128	19.928	573922	0	16.2665	0	633	30.02
08/03 04:55:00	21.7	21.3106	20.4542	20.1755	20.525	19.9068	576644	0	16.2665	0	634	30.02
08/03 05:00:00	21.7	21.2875	20.4394	20.281	20.5428	19.8885	579318	0	16.2665	0	635	30.02
08/03 05:05:00	21.7917	21.9533	21.5072	21.6175	21.5877	21.2078	3.08017	0	30.2628	0	636	34.47
08/03 05:10:00	21.8833	22.6757	22.5104	22.8889	22.5804	22.412	3.08002	0	30.2628	0	637	34.47
08/03 05:15:00	21.975	23.1277	23.0568	23.6437	23.1346	23.0534	3.08091	0	30.2628	0	638	34.47
08/03 05:20:00	22.0667	23.3851	23.3493	24.1065	23.4392	23.3928	3.08275	0	30.2628	0	639	34.47
08/03 05:25:00	22.1583	23.5666	23.5539	24.4675	23.6523	23.6269	3.08548	0	30.2628	0	640	34.47
08/03 05:30:00	22.25	23.7296	23.7383	24.8341	23.8453	23.8346	3.08912	0	30.2628	0	641	34.47
08/03 05:35:00	22.3417	23.8269	23.8548	24.9322	23.9694	23.964	3.09049	0	30.2628	0	642	34.47
08/03 05:40:00	22.4333	23.9043	23.9542	24.9794	24.078	24.0743	3.08769	0	30.2628	0	643	34.47
08/03 05:45:00	22.525	23.9671	24.042	25.03	24.1725	24.1724	3.08399	0	30.2628	0	644	34.47
08/03 05:50:00	22.6167	24.0189	24.1217	25.0894	24.2556	24.2618	3.08158	0	30.2628	0	645	34.47
08/03 05:55:00	22.7083	24.0625	24.1958	25.1578	24.3311	24.3452	3.08037	0	30.2628	0	646	34.47
08/03 06:00:00	22.8	24.1	24.2658	25.2338	24.4015	24.4239	3.08026	0	30.2628	0	647	34.47
08/03 06:05:00	22.9833	24.1328	24.3353	25.3186	24.471	24.5015	8.36915	0	31.2283	0	648	42.95
08/03 06:10:00	23.1667	24.1632	24.404	25.4104	24.5397	24.5778	8.38216	0	31.2283	0	649	42.95
08/03 06:15:00	23.35	24.1905	24.4719	25.5078	24.6079	24.6525	8.37499	0	31.2283	0	650	42.95
08/03 06:20:00	23.5333	24.2156	24.5394	25.6094	24.6755	24.7259	8.36248	0	31.2283	0	651	42.95
08/03 06:25:00	23.7167	24.2388	24.6071	25.7137	24.7425	24.7985	8.37027	0	31.2283	0	652	42.95
08/03 06:30:00	23.9	24.2604	24.6752	25.8204	24.809	24.8705	8.38158	0	31.2283	0	653	42.95
08/03 06:35:00	24.0833	24.2806	24.7449	25.9448	24.8795	24.9436	8.3732	0	31.2283	0	654	42.95
08/03 06:40:00	24.2667	24.2996	24.8144	26.0722	24.9478	25.0159	8.36247	0	31.2283	0	655	42.95
08/03 06:45:00	24.45	24.3177	24.8829	26.1993	25.0131	25.0867	8.37172	0	31.2283	0	656	42.95
08/03 06:50:00	24.6333	24.3348	24.9511	26.3263	25.076	25.1565	8.38128	0	31.2283	0	657	42.95
08/03 06:55:00	24.8167	24.3513	25.0193	26.4543	25.1368	25.2256	8.37164	0	31.2283	0	658	42.95
08/03 07:00:00	25	24.3671	25.0872	26.584	25.1957	25.2944	8.36264	0	31.2283	0	659	42.95
08/03 07:05:00	25.1417	24.7611	25.5037	27.0427	25.6071	25.7093	15.4353	1	30.6898	16347.1	660	53.77
08/03 07:10:00	25.2833	25.3131	26.0517	27.6147	26.1451	26.2504	15.4151	1	30.6898	23630.3	661	53.77
08/03 07:15:00	25.425	25.6794	26.4097	27.9788	26.4918	26.602	15.4293	1	30.6898	29174.5	662	53.77
08/03 07:20:00	25.5667	25.9839	26.7154	28.3069	26.7798	26.9041	15.43	1	30.6898	34310.1	663	53.77
08/03 07:25:00	25.7083	26.1527	26.9009	28.5241	26.9506	27.087	15.422	1	30.6898	37466.7	664	53.77
08/03 07:30:00	25.85	26.2832	27.0609	28.7188	27.0956	27.2421	136594	1	30.6898	40124	665	53.77
08/03 07:35:00	25.9917	26.3893	27.2078	28.8862	27.2264	27.3815	130785	1	30.6898	42445.5	666	53.77
08/03 07:40:00	26.1333	26.4793	27.3469	29.0333	27.3484	27.511	124790	1	30.6898	44544.8	667	53.77
08/03 07:45:00	26.275	26.5583	27.4809	29.1662	27.4646	27.6339	15.4152	1	30.6898	46494.1	668	53.77
08/03 07:50:00	26.4167	26.6294	27.611	29.2883	27.5762	27.7516	120257	1	30.6898	48337.4	669	53.77
08/03 07:55:00	26.5583	26.6948	27.7382	29.4016	27.6844	27.8654	116603	1	30.6898	50103.2	670	53.77
08/03 08:00:00	26.7	26.7557	27.863	29.5075	27.7896	27.976	113447	1	30.6898	51809.9	671	53.77
08/03 08:05:00	26.8333	25.6124	25.6464	26.5833	25.6764	25.1279	527742	1	24.1993	22960.6	672	66.73
08/03 08:10:00	26.9667	24.3992	24.2192	24.5086	24.235	24.2112	526507	1	24.1993	7984.63	673	66.73
08/03 08:15:00	27.1	24.2018	24.2069	24.2095	24.2074	24.2072	441930	1	24.1993	6672.01	674	66.73
08/03 08:20:00	27.2333	24.2017	24.2061	24.2073	24.2065	24.2064	423572	1	24.1993	6669.13	675	66.73
08/03 08:25:00	27.3667	24.2016	24.2051	24.2053	24.2054	24.2052	418982	1	24.1993	6665.63	676	66.73
08/03 08:30:00	27.5	24.2016	24.2043	24.204	24.2045	24.2044	417503	1	24.1993	6663.04	677	66.73
08/03 08:35:00	27.6333	24.2015	24.2037	24.2031	24.2039	24.2037	417160	1	24.1993	6661.11	678	66.73
08/03 08:40:00	27.7667	24.2015	24.2033	24.2025	24.2034	24.2032	417492	1	24.1993	6659.66	679	66.73
08/03 08:45:00	27.9	24.2014	24.2029	24.2021	24.2029	24.2028	418337	1	24.1993	6658.55	680	66.73
08/03 08:50:00	28.0333	24.2014	24.2026	24.2019	24.2026	24.2025	419617	1	24.1993	6657.71	681	66.73
08/03 08:55:00	28.1667	24.2014	24.2024	24.2017	24.2024	24.2022	421258	1	24.1993	6657.05	682	66.73
08/03 09:00:00	28.3	24.2014	24.2022	24.2016	24.2022	24.202	423212	1	24.1993	6656.55	683	66.73
08/03 09:05:00	28.3917	24.0119	24.0206	24.0279	24.0217	24.0228	455887	1	23.9977	5278.54	684	79.71
08/03 09:10:00	28.4833	24.0008	24.0027	24.0041	24.0029	24.003	455668	1	23.9977	5182.93	685	79.71
08/03 09:15:00	28.575	24	24.0007	24.0005	24.0007	24.0006	456052	1	23.9977	5174.27	686	79.71
08/03 09:20:00	28.6667	23.9999	24.0004	24	24.0003	24.0002	456590	1	23.9977	5172.99	687	79.71
08/03 09:25:00	28.7583	23.9999	24.0002	23.9998	24.0002	24.0001	457764	1	23.9977	5172.46	688	79.71
08/03 09:30:00	28.85	23.9999	24.0001	23.9998	24.0001	24	459369	1	23.9977	5172.1	689	79.71
08/03 09:35:00	28.9417	23.9998	24.0001	23.9997	24	23.9999	461062	1	23.9977	5171.82	690	79.71
08/03 09:40:00	29.0333	23.9998	24	23.9997	23.9999	23.9999	462969	1	23.9977	5171.59	691	79.71
08/03 09:45:00	29.125	23.9998	24	23.9997	23.9999	23.9999	465070	1	23.9977	5171.4	692	79.71
08/03 09:50:00	29.2167	23.9997	23.9999	23.9997	23.9999	23.9999	467312	1	23.9977	5171.25	693	79.71
08/03 09:55:00	29.3083	23.9997	23.9999	23.9997	23.9999	23.9998	469667	1	23.9977	5171.13	694	79.71
08/03 10:00:00	29.4	23.9997	23.9999	23.9997	23.9999	23.9998	472115	1	23.9977	5171.03	695	79.71
08/03 10:05:00	29.5	24.0467	24.0446	24.0431	24.0443	24.044	449624	0.8	24.0473	4395.35	696	93.09
08/03 10:10:00	29.6	24.0487	24.0485	24.0481	24.0485	24.0484	445134	0.8	24.0473	4410.92	697	93.09
08/03 10:15:00	29.7	24.0489	24.049	24.0488	24.0489	24.0489	444539	0.8	24.0473	4412.26	698	93.09
08/03 10:20:00	29.8	24.0489	24.049	24.0489	24.049	24.049	445358	0.8	24.0473	4412.44	699	93.09
08/03 10:25:00	29.9	24.0489	24.0491	24.0489	24.049	24.049	446624	0.8	24.0473	4412.51	700	93.09
08/03 10:30:00	30	24.0489	24.0491	24.0489	24.0491	24.0491	448144	0.8	24.0473	4412.57	701	93.09
08/03 10:35:00	30.1	24.0489	24.0491	24.049	24.0491	24.0491	449693	0.8	24.0473	4412.61	702	93.09
08/03 10:40:00	30.2	24.0489	24.0491	24.049	24.0491	24.0491	451248	0.8	24.0473	4412.64	703	93.09
08/03 10:45:00	30.3	24.0489	24.0491	24.049	24.0491	24.0491	452814	0.8	24.0473	4412.67	704	93.09
08/03 10:50:00	30.4	24.0489	24.0491	24.049	24.0491	24.0491	454383	0.8	24.0473	4412.69	705	93.09
08/03 10:55:00	30.5	24.0489	24.0491	24.049	24.0491	24.0491	455948	0.8	24.0473	4412.71	706	93.09
08/03 11:00:00	30.6	24.0489	24.0491	24.049	24.0491	24.0491	457504	0.8	24.0473	4412.72	707	93.09
08/03 11:05:00	30.6	23.5695	23.5681	23.5635	23.6341	23.5639	537128	0.4	23.5388	1062.87	708	104.25
08/03 11:10:00	30.6	23.5404	23.5408	23.5407	23.5418	23.5408	485751	0.4	23.5388	995.819	709	104.25
08/03 11:15:00	30.6	23.5402	23.5404	23.5402	23.5404	23.5403	469783	0.4	23.5388	995.155	710	104.25
08/03 11:20:00	30.6	23.5401	23.5402	23.54	23.5401	23.5401	461733	0.4	23.5388	994.88	711	104.25
08/03 11:25:00	30.6	23.5401	23.5401	23.5399	23.54	23.54	455859	0.4	23.5388	994.731	712	104.25
08/03 11:30:00	30.6	23.54	23.54	23.5399	23.54	23.54	451155	0.4	23.5388	994.623	713	104.25
08/03 11:35:00	30.6	23.54	23.54	23.5399	23.5399	23.5399	446730	0.4	23.5388	994.544	714	104.25
08/03 11:40:00	30.6	23.5399	23.5399	23.5398	23.5399	23.5399	443009	0.4	23.5388	994.484	715	104.25
08/03 11:45:00	30.6	23.5399	23.5399	23.5398	23.5399	23.5399	439924	0.4	23.5388	994.438	716	104.25
08/03 11:50:00	30.6	23.5399	23.5399	23.5398	23.5399	23.5399	437241	0.4	23.5388	994.402	717	104.25
08/03 11:55:00	30.6	23.5399	23.5399	23.54	23.5399	23.5399	436659	0.4	23.5388	994.399	718	104.25
08/03 12:00:00	30.6	23.5399	23.5399	23.54	23.5399	23.5399	436535	0.4	23.5388	994.41	719	104.25
08/03 12:05:00	30.6	24.0997	24.6235	24.636	24.6335	24.5894	350576	0.8	24.8539	5802.83	720	116.09
08/03 12:10:00	30.6	24.7704	24.8457	24.8455	24.8459	24.8452	340669	0.8	24.8539	9676.05	721	116.09
08/03 12:15:00	30.6	24.8544	24.8545	24.8545	24.8545	24.8544	354485	0.8	24.8539	10195.4	722	116.09
08/03 12:20:00	30.6	24.8546	24.8548	24.8549	24.8548	24.8547	364210	0.8	24.8539	10197.2	723	116.09
08/03 12:25:00	30.6	24.8547	24.855	24.8551	24.855	24.8549	369549	0.8	24.8539	10198.3	724	116.09
08/03 12:30:00	30.6	24.8548	24.8552	24.8553	24.8552	24.8551	373316	0.8	24.8539	10199.3	725	116.09
08/03 12:35:00	30.6	24.8548	24.8553	24.8554	24.8553	24.8553	376403	0.8	24.8539	10200.2	726	116.09
08/03 12:40:00	30.6	24.8549	24.8554	24.8555	24.8554	24.8554	379081	0.8	24.8539	10201	727	116.09
08/03 12:45:00	30.6	24.855	24.8555	24.8556	24.8555	24.8555	381496	0.8	24.8539	10201.6	728	116.09
08/03 12:50:00	30.6	24.8551	24.8556	24.8557	24.8556	24.8556	383714	0.8	24.8539	10202.2	729	116.09
08/03 12:55:00	30.6	24.8551	24.8557	24.8557	24.8556	24.8557	385782	0.8	24.8539	10202.7	730	116.09
08/03 13:00:00	30.6	24.8552	24.8557	24.8557	24.8557	24.8557	387712	0.8	24.8539	10203.2	731	116.09
08/03 13:05:00	30.6917	24.8555	24.8559	24.8559	24.8559	24.8559	399924	1	24.8539	12756.9	732	127.03
08/03 13:10:00	30.7833	24.8556	24.856	24.8561	24.856	24.8561	409600	1	24.8539	12758.3	733	127.03
08/03 13:15:00	30.875	24.8557	24.8561	24.8561	24.8561	24.8562	414033	1	24.8539	12758.9	734	127.03
08/03 13:20:00	30.9667	24.8557	24.8561	24.8561	24.8561	24.8562	418377	1	24.8539	12759.3	735	127.03
08/03 13:25:00	31.0583	24.8557	24.8561	24.8561	24.8561	24.8562	422477	1	24.8539	12759.6	736	127.03
08/03 13:30:00	31.15	24.8558	24.8561	24.8561	24.8561	24.8562	426437	1	24.8539	12759.9	737	127.03
08/03 13:35:00	31.2417	24.8558	24.8561	24.8561	24.8561	24.8562	430241	1	24.8539	12760.2	738	127.03
08/03 13:40:00	31.3333	24.8558	24.8561	24.8561	24.8561	24.8562	433820	1	24.8539	12760.3	739	127.03
08/03 13:45:00	31.425	24.8559	24.8561	24.8561	24.8561	24.8562	437207	1	24.8539	12760.5	740	127.03
08/03 13:50:00	31.5167	24.8559	24.8561	24.8561	24.8561	24.8562	440447	1	24.8539	12760.6	741	127.03
08/03 13:55:00	31.6083	24.8559	24.8561	24.8561	24.8561	24.8562	443569	1	24.8539	12760.7	742	127.03
08/03 14:00:00	31.7	24.8559	24.8561	24.8561	24.8561	24.8562	446588	1	24.8539	12760.8	743	127.03
08/03 14:05:00	31.7	24.8559	24.8561	24.8561	24.8561	24.8562	448370	1	24.8539	12760.9	744	138.96
08/03 14:10:00	31.7	24.8559	24.8561	24.8561	24.8561	24.8562	449054	1	24.8539	12760.9	745	138.96
08/03 14:15:00	31.7	24.8559	24.856	24.8561	24.8561	24.8562	449317	1	24.8539	12761	746	138.96
08/03 14:20:00	31.7	24.8559	24.856	24.8561	24.8561	24.8561	449339	1	24.8539	12761	747	138.96
08/03 14:25:00	31.7	24.856	24.856	24.856	24.8561	24.8561	449206	1	24.8539	12761	748	138.96
08/03 14:30:00	31.7	24.856	24.856	24.856	24.856	24.8561	448956	1	24.8539	12761	749	138.96
08/03 14:35:00	31.7	24.856	24.856	24.856	24.856	24.8561	448744	1	24.8539	12761	750	138.96
08/03 14:40:00	31.7	24.856	24.856	24.856	24.856	24.8561	448549	1	24.8539	12761	751	138.96
08/03 14:45:00	31.7	24.856	24.856	24.856	24.856	24.8561	448341	1	24.8539	12761	752	138.96
08/03 14:50:00	31.7	24.856	24.856	24.856	24.856	24.8561	448108	1	24.8539	12761	753	138.96
08/03 14:55:00	31.7	24.856	24.856	24.856	24.856	24.8561	447845	1	24.8539	12761	754	138.96
08/03 15:00:00	31.7	24.856	24.856	24.856	24.856	24.8561	447549	1	24.8539	12761	755	138.96
08/03 15:05:00	31.7	24.856	24.856	24.856	24.856	24.8561	447225	1	24.8539	12760.9	756	145.87
08/03 15:10:00	31.7	24.856	24.856	24.856	24.856	24.8561	446953	1	24.8539	12760.9	757	145.87
08/03 15:15:00	31.7	24.856	24.856	24.856	24.856	24.8561	446583	1	24.8539	12761	758	145.87
08/03 15:20:00	31.7	24.856	24.856	24.856	24.856	24.8561	446157	1	24.8539	12761	759	145.87
08/03 15:25:00	31.7	24.856	24.856	24.856	24.856	24.856	445692	1	24.8539	12761	760	145.87
08/03 15:30:00	31.7	24.856	24.856	24.856	24.856	24.856	445190	1	24.8539	12761	761	145.87
08/03 15:35:00	31.7	24.856	24.856	24.856	24.856	24.856	444532	1	24.8539	12761	762	145.87
08/03 15:40:00	31.7	24.856	24.8559	24.856	24.856	24.856	443760	1	24.8539	12760.9	763	145.87
08/03 15:45:00	31.7	24.856	24.8559	24.8559	24.856	24.856	442915	1	24.8539	12760.9	764	145.87
08/03 15:50:00	31.7	24.856	24.8561	24.8559	24.856	24.856	443590	1	24.8539	12761.1	765	145.87
08/03 15:55:00	31.7	24.856	24.8561	24.856	24.856	24.856	444337	1	24.8539	12761.2	766	145.87
08/03 16:00:00	31.7	24.856	24.8561	24.856	24.856	24.856	444360	1	24.8539	12761.3	767	145.87
08/03 16:05:00	31.6083	24.856	24.8561	24.8559	24.8559	24.856	444585	1	24.8539	12761.2	768	149.02
08/03 16:10:00	31.5167	24.856	24.856	24.8559	24.8559	24.8559	444974	1	24.8539	12761	769	149.02
08/03 16:15:00	31.425	24.856	24.856	24.8559	24.8559	24.8559	445163	1	24.8539	12760.8	770	149.02
08/03 16:20:00	31.3333	24.856	24.856	24.8559	24.8559	24.8559	445413	1	24.8539	12760.6	771	149.02
08/03 16:25:00	31.2417	24.8559	24.856	24.8559	24.8559	24.8559	445716	1	24.8539	12760.4	772	149.02
08/03 16:30:00	31.15	24.8559	24.8559	24.8559	24.8559	24.8559	445999	1	24.8539	12760.2	773	149.02
08/03 16:35:00	31.0583	24.8559	24.8559	24.8559	24.8559	24.8559	446155	1	24.8539	12760.1	774	149.02
08/03 16:40:00	30.9667	24.8559	24.8559	24.8559	24.8559	24.8559	446264	1	24.8539	12760	775	149.02
08/03 16:45:00	30.875	24.8559	24.8559	24.8559	24.8559	24.8559	446342	1	24.8539	12759.9	776	149.02
08/03 16:50:00	30.7833	24.8559	24.8559	24.8559	24.8559	24.8559	446373	1	24.8539	12759.8	777	149.02
08/03 16:55:00	30.6917	24.8559	24.8559	24.8559	24.8559	24.8559	446349	1	24.8539	12759.7	778	149.02
08/03 17:00:00	30.6	24.8558	24.8559	24.8559	24.8559	24.8559	446265	1	24.8539	12759.6	779	149.02
08/03 17:05:00	30.6	24.8552	24.8555	24.8555	24.8555	24.8555	415636	0.5	24.8539	6376.8	780	132.5
08/03 17:10:00	30.6	24.8551	24.8552	24.8551	24.8552	24.8551	401388	0.5	24.8539	6375.6	781	132.5
08/03 17:15:00	30.6	24.855	24.8551	24.8551	24.8551	24.855	396666	0.5	24.8539	6375.36	782	132.5
08/03 17:20:00	30.6	24.855	24.8551	24.8551	24.8551	24.855	394205	0.5	24.8539	6375.24	783	132.5
08/03 17:25:00	30.6	24.855	24.8551	24.8551	24.8551	24.8551	392670	0.5	24.8539	6375.15	784	132.5
08/03 17:30:00	30.6	24.8549	24.8551	24.8551	24.8551	24.8551	391644	0.5	24.8539	6375.08	785	132.5
08/03 17:35:00	30.6	24.8549	24.8551	24.8551	24.8551	24.8551	390894	0.5	24.8539	6375.03	786	132.5
08/03 17:40:00	30.6	24.8549	24.8551	24.8551	24.8551	24.8551	390321	0.5	24.8539	6374.98	787	132.5
08/03 17:45:00	30.6	24.8549	24.8551	24.8551	24.8551	24.8551	389880	0.5	24.8539	6374.94	788	132.5
08/03 17:50:00	30.6	24.8549	24.8551	24.8551	24.8551	24.8551	389534	0.5	24.8539	6374.91	789	132.5
08/03 17:55:00	30.6	24.8549	24.8551	24.8551	24.8551	24.8551	389261	0.5	24.8539	6374.89	790	132.5
08/03 18:00:00	30.6	24.8549	24.8551	24.8551	24.8551	24.8551	389043	0.5	24.8539	6374.87	791	132.5
08/03 18:05:00	30.5	24.8545	24.8551	24.8551	24.8551	24.8552	333912	0	24.8539	0	792	116.15
08/03 18:10:00	30.4	24.8545	24.8552	24.8552	24.8552	24.8553	329625	0	24.8539	0	793	116.15
08/03 18:15:00	30.3	24.8544	24.8553	24.8554	24.8554	24.8557	325535	0	24.8539	0	794	116.15
08/03 18:20:00	30.2	24.8544	24.8554	24.8555	24.8554	24.8558	320685	0	24.8539	0	795	116.15
08/03 18:25:00	30.1	24.8544	24.8555	24.8556	24.8555	24.8559	317251	0	24.8539	0	796	116.15
08/03 18:30:00	30	24.8543	24.8555	24.8556	24.8556	24.8559	314769	0	24.8539	0	797	116.15
08/03 18:35:00	29.9	24.8543	24.8556	24.8557	24.8556	24.856	312904	0	24.8539	0	798	116.15
08/03 18:40:00	29.8	24.8543	24.8556	24.8558	24.8557	24.856	311384	0	24.8539	0	799	116.15
08/03 18:45:00	29.7	24.8543	24.8557	24.8558	24.8557	24.856	310069	0	24.8539	0	800	116.15
08/03 18:50:00	29.6	24.8543	24.8557	24.8558	24.8558	24.856	308881	0	24.8539	0	801	116.15
08/03 18:55:00	29.5	24.8543	24.8557	24.8558	24.8558	24.856	307770	0	24.8539	0	802	116.15
08/03 19:00:00	29.4	24.8542	24.8557	24.8559	24.8558	24.856	306707	0	24.8539	0	803	116.15
08/03 19:05:00	29.4	25.0421	25.3962	25.4659	25.4373	25.6382	7.48463	0	31.5049	0	804	102.27
08/03 19:10:00	29.4	25.289	25.988	26.1215	26.0564	26.415	7.48087	0	31.5049	0	805	102.27
08/03 19:15:00	29.4	25.4229	26.2607	26.4177	26.3315	26.7286	7.49059	0	31.5049	0	806	102.27
08/03 19:20:00	29.4	25.5359	26.4586	26.6288	26.5284	26.9401	7.50019	0	31.5049	0	807	102.27
08/03 19:25:00	29.4	25.5992	26.5525	26.7279	26.6188	27.0312	7.4918	0	31.5049	0	808	102.27
08/03 19:30:00	29.4	25.6481	26.6181	26.7963	26.6794	27.0882	7.48194	0	31.5049	0	809	102.27
08/03 19:35:00	29.4	25.6862	26.6675	26.8468	26.723	27.126	7.48679	0	31.5049	0	810	102.27
08/03 19:40:00	29.4	25.7168	26.7078	26.8863	26.7564	27.1525	7.50206	0	31.5049	0	811	102.27
08/03 19:45:00	29.4	25.7427	26.7406	26.9193	26.7823	27.1724	7.49865	0	31.5049	0	812	102.27
08/03 19:50:00	29.4	25.7642	26.7672	26.9478	26.8029	27.1882	7.48297	0	31.5049	0	813	102.27
08/03 19:55:00	29.4	25.7824	26.7894	26.9721	26.8197	27.2009	7.48296	0	31.5049	0	814	102.27
08/03 20:00:00	29.4	25.7979	26.8082	26.9929	26.8338	27.2116	7.4961	0	31.5049	0	815	102.27
08/03 20:05:00	29.125	25.7898	26.7972	26.9834	26.8187	27.1934	3.53211	0	31.5049	0	816	99.57
08/03 20:10:00	28.85	25.783	26.7865	26.9735	26.8038	27.1754	3.52933	0	31.5049	0	817	99.57
08/03 20:15:00	28.575	25.7783	26.7753	26.9626	26.7885	27.157	3.52452	0	31.5049	0	818	99.57
08/03 20:20:00	28.3	25.775	26.763	26.9503	26.7724	27.1379	3.52161	0	31.5049	0	819	99.57
08/03 20:25:00	28.025	25.7728	26.7495	26.9363	26.7551	27.1187	3.52043	0	31.5049	0	820	99.57
08/03 20:30:00	27.75	25.7713	26.7348	26.9208	26.7366	27.0995	3.52084	0	31.5049	0	821	99.57
08/03 20:35:00	27.475	25.7704	26.7189	26.9045	26.7175	27.0802	3.52272	0	31.5049	0	822	99.57
08/03 20:40:00	27.2	25.7698	26.7015	26.8871	26.6982	27.0605	3.52595	0	31.5049	0	823	99.57
08/03 20:45:00	26.925	25.7696	26.6828	26.8688	26.6784	27.0404	3.53044	0	31.5049	0	824	99.57
08/03 20:50:00	26.65	25.7696	26.6631	26.8497	26.6581	27.0197	3.53195	0	31.5049	0	825	99.57
08/03 20:55:00	26.375	25.7697	26.6426	26.83	26.6374	26.9986	3.52822	0	31.5049	0	826	99.57
08/03 21:00:00	26.1	25.7699	26.6218	26.8097	26.6161	26.977	3.52379	0	31.5049	0	827	99.57
08/03 21:05:00	26.0583	25.7701	26.6063	26.7947	26.6001	26.9608	2.20091	0	31.5049	0	828	94.63
08/03 21:10:00	26.0167	25.77	26.5943	26.783	26.5874	26.9479	2.20035	0	31.5049	0	829	94.63
08/03 21:15:00	25.975	25.77	26.5846	26.7733	26.5767	26.937	2.20022	0	31.5049	0	830	94.63
08/03 21:20:00	25.9333	25.77	26.5762	26.7647	26.5673	26.9273	2.20048	0	31.5049	0	831	94.63
08/03 21:25:00	25.8917	25.77	26.5687	26.757	26.5587	26.9183	2.20112	0	31.5049	0	832	94.63
08/03 21:30:00	25.85	25.7701	26.5618	26.7496	26.5507	26.9099	2.20212	0	31.5049	0	833	94.63
08/03 21:35:00	25.8083	25.7701	26.5553	26.7426	26.543	26.9019	2.20346	0	31.5049	0	834	94.63
08/03 21:40:00	25.7667	25.7702	26.549	26.7358	26.5355	26.8941	2.20512	0	31.5049	0	835	94.63
08/03 21:45:00	25.725	25.7703	26.5429	26.7291	26.5283	26.8864	2.2071	0	31.5049	0	836	94.63
08/03 21:50:00	25.6833	25.7704	26.5369	26.7224	26.5211	26.8788	2.20782	0	31.5049	0	837	94.63
08/03 21:55:00	25.6417	25.7705	26.5309	26.7158	26.514	26.8714	2.20625	0	31.5049	0	838	94.63
08/03 22:00:00	25.6	25.7706	26.525	26.7092	26.507	26.864	2.2041	0	31.5049	0	839	94.63
08/03 22:05:00	25.6	25.7707	26.5201	26.7036	26.501	26.8576	2.20244	0	31.5049	0	840	73.51
08/03 22:10:00	25.6	25.7708	26.5159	26.6987	26.4956	26.8519	2.20127	0	31.5049	0	841	73.51
08/03 22:15:00	25.6	25.7709	26.512	26.6941	26.4907	26.8465	2.20055	0	31.5049	0	842	73.51
08/03 22:20:00	25.6	25.771	26.5085	26.6897	26.486	26.8414	2.20025	0	31.5049	0	843	73.51
08/03 22:25:00	25.6	25.7711	26.5051	26.6856	26.4815	26.8366	2.20037	0	31.5049	0	844	73.51
08/03 22:30:00	25.6	25.7712	26.5018	26.6815	26.4772	26.8318	2.20086	0	31.5049	0	845	73.51
08/03 22:35:00	25.6	25.7714	26.4986	26.6776	26.473	26.8272	2.20172	0	31.5049	0	846	73.51
08/03 22:40:00	25.6	25.7715	26.4956	26.6737	26.4689	26.8226	2.20293	0	31.5049	0	847	73.51
08/03 22:45:00	25.6	25.7716	26.4925	26.6699	26.4648	26.8181	2.20448	0	31.5049	0	848	73.51
08/03 22:50:00	25.6	25.7717	26.4896	26.6661	26.4609	26.8137	2.20634	0	31.5049	0	849	73.51
08/03 22:55:00	25.6	25.7719	26.4866	26.6623	26.457	26.8093	2.20795	0	31.5049	0	850	73.51
08/03 23:00:00	25.6	25.772	26.4837	26.6586	26.4531	26.8049	2.20723	0	31.5049	0	851	73.51
08/03 23:05:00	25.6417	25.7722	26.482	26.656	26.4504	26.8017	2.20487	0	31.5049	0	852	57.31
08/03 23:10:00	25.6833	25.7723	26.4808	26.6541	26.4485	26.7993	2.20303	0	31.5049	0	853	57.31
08/03 23:15:00	25.725	25.7725	26.4802	26.6526	26.4469	26.7972	2.20167	0	31.5049	0	854	57.31
08/03 23:20:00	25.7667	25.7726	26.4799	26.6515	26.4457	26.7954	2.20078	0	31.5049	0	855	57.31
08/03 23:25:00	25.8083	25.7728	26.4798	26.6506	26.4447	26.7938	2.20033	0	31.5049	0	856	57.31
08/03 23:30:00	25.85	25.773	26.4799	26.6499	26.4439	26.7925	2.20029	0	31.5049	0	857	57.31
08/03 23:35:00	25.8917	25.7732	26.4801	26.6493	26.4433	26.7913	2.20064	0	31.5049	0	858	57.31
08/03 23:40:00	25.9333	25.7734	26.4805	26.6489	26.4428	26.7902	2.20136	0	31.5049	0	859	57.31
08/03 23:45:00	25.975	25.7736	26.4809	26.6486	26.4424	26.7892	2.20244	0	31.5049	0	860	57.31
08/03 23:50:00	26.0167	25.7739	26.4815	26.6484	26.4422	26.7883	2.20386	0	31.5049	0	861	57.31
08/03 23:55:00	26.0583	25.7741	26.4822	26.6482	26.442	26.7875	2.2056	0	31.5049	0	862	57.31
08/03 24:00:00	26.1	25.7744	26.4829	26.6481	26.442	26.7868	2.20765	0	31.5049	0	863	57.31
08/04 00:05:00	26.1	25.8242	26.5296	26.6938	26.4879	26.8316	2.20701	0	28.8849	0	864	47.95
08/04 00:10:00	26.1	25.8661	26.5616	26.7239	26.5187	26.8604	2.20492	0	28.8849	0	865	47.95
08/04 00:15:00	26.1	25.8996	26.5843	26.7443	26.5398	26.8792	2.20288	0	28.8849	0	866	47.95
08/04 00:20:00	26.1	25.9262	26.6016	26.7588	26.5548	26.8921	2.20135	0	28.8849	0	867	47.95
08/04 00:25:00	26.1	25.9474	26.6151	26.7695	26.566	26.9012	2.20028	0	28.8849	0	868	47.95
08/04 00:30:00	26.1	25.9644	26.6256	26.7779	26.5746	26.908	2.19966	0	28.8849	0	869	47.95
08/04 00:35:00	26.1	25.9783	26.6338	26.7846	26.5816	26.9131	2.19947	0	28.8849	0	870	47.95
08/04 00:40:00	26.1	25.9897	26.6403	26.79	26.5872	26.9171	2.19967	0	28.8849	0	871	47.95
08/04 00:45:00	26.1	25.9994	26.6455	26.7945	26.5919	26.9202	2.20025	0	28.8849	0	872	47.95
08/04 00:50:00	26.1	26.0077	26.6498	26.7982	26.5957	26.9227	2.2012	0	28.8849	0	873	47.95
08/04 00:55:00	26.1	26.0149	26.6534	26.8011	26.599	26.9248	2.20249	0	28.8849	0	874	47.95
08/04 01:00:00	26.1	26.0214	26.6564	26.8036	26.6017	26.9265	2.20411	0	28.8849	0	875	47.95
08/04 01:05:00	25.8667	26.0272	26.6532	26.7995	26.5982	26.9217	2.20604	0	30.1461	0	876	38.69
08/04 01:10:00	25.6333	26.0324	26.6456	26.7908	26.59	26.9124	2.2071	0	30.1461	0	877	38.69
08/04 01:15:00	25.4	26.0373	26.6348	26.7786	26.5783	26.8997	2.20587	0	30.1461	0	878	38.69
08/04 01:20:00	25.1667	26.0419	26.6216	26.7636	26.5639	26.8847	2.20363	0	30.1461	0	879	38.69
08/04 01:25:00	24.9333	26.0461	26.6064	26.7466	26.5473	26.8682	2.2019	0	30.1461	0	880	38.69
08/04 01:30:00	24.7	26.0501	26.5892	26.7283	26.5297	26.8506	2.20066	0	30.1461	0	881	38.69
08/04 01:35:00	24.4667	26.0539	26.5703	26.7093	26.5112	26.8321	2.19987	0	30.1461	0	882	38.69
08/04 01:40:00	24.2333	26.0575	26.5506	26.6897	26.4922	26.813	2.19951	0	30.1461	0	883	38.69
08/04 01:45:00	24	26.0609	26.5305	26.6697	26.4727	26.7934	2.19956	0	30.1461	0	884	38.69
08/04 01:50:00	23.7667	26.0642	26.5103	26.6494	26.4529	26.7733	2.2	0	30.1461	0	885	38.69
08/04 01:55:00	23.5333	26.0673	26.49	26.6289	26.4328	26.7528	2.2008	0	30.1461	0	886	38.69
08/04 02:00:00	23.3	26.0703	26.4695	26.6081	26.4124	26.7319	2.20196	0	30.1461	0	887	38.69
08/04 02:05:00	23.3917	24.9094	24.333	24.058	24.3935	23.9027	494454	0	17.9964	0	888	33.46
08/04 02:10:00	23.4833	23.6877	22.8344	22.4367	22.9414	22.2028	581393	0	17.9964	0	889	33.46
08/04 02:15:00	23.575	23.1527	22.4415	22.0498	22.5476	21.8157	597771	0	17.9964	0	890	33.46
08/04 02:20:00	23.6667	22.8687	22.1968	21.7923	22.3064	21.5486	587877	0	17.9964	0	891	33.46
08/04 02:25:00	23.7583	22.6328	21.9655	21.5452	22.0797	21.291	572617	0	17.9964	0	892	33.46
08/04 02:30:00	23.85	22.5113	21.8414	21.4133	21.9575	21.1542	557221	0	17.9964	0	893	33.46
08/04 02:35:00	23.9417	22.4212	21.7429	21.3085	21.8605	21.0456	531709	0	17.9964	0	894	33.46
08/04 02:40:00	24.0333	22.3476	21.6574	21.2175	21.7764	20.9513	514898	0	17.9964	0	895	33.46
08/04 02:45:00	24.125	22.2841	21.5802	21.1352	21.7005	20.866	503676	0	17.9964	0	896	33.46
08/04 02:50:00	24.2167	22.2273	21.5097	21.0601	21.631	20.7883	495542	0	17.9964	0	897	33.46
08/04 02:55:00	24.3083	22.1753	21.4444	20.9905	21.5666	20.7163	489494	0	17.9964	0	898	33.46
08/04 03:00:00	24.4	22.1271	21.3837	20.926	21.5068	20.6496	485382	0	17.9964	0	899	33.46
08/04 03:05:00	24.4	22.082	21.3249	20.8637	21.4487	20.5852	482184	0	19.3408	0	900	30.31
08/04 03:10:00	24.4	22.0393	21.2692	20.8047	21.3936	20.5245	479496	0	19.3408	0	901	30.31
08/04 03:15:00	24.4	21.9987	21.2161	20.7487	21.3411	20.4668	477260	0	19.3408	0	902	30.31
08/04 03:20:00	24.4	21.9599	21.1657	20.6954	21.2911	20.4121	475396	0	19.3408	0	903	30.31
08/04 03:25:00	24.4	21.9226	21.1174	20.6446	21.2432	20.3599	473834	0	19.3408	0	904	30.31
08/04 03:30:00	24.4	21.8868	21.0712	20.596	21.1974	20.31	472515	0	19.3408	0	905	30.31
08/04 03:35:00	24.4	21.8521	21.0268	20.5494	21.1533	20.2621	471391	0	19.3408	0	906	30.31
08/04 03:40:00	24.4	21.8185	20.9841	20.5046	21.1109	20.2162	470424	0	19.3408	0	907	30.31
08/04 03:45:00	24.4	21.7859	20.9428	20.4613	21.0699	20.1719	469583	0	19.3408	0	908	30.31
08/04 03:50:00	24.4	21.7542	20.903	20.4196	21.0303	20.1291	468844	0	19.3408	0	909	30.31
08/04 03:55:00	24.4	21.7233	20.8643	20.3792	20.9918	20.0878	468188	0	19.3408	0	910	30.31
08/04 04:00:00	24.4	21.6931	20.8269	20.3401	20.9546	20.0477	467600	0	19.3408	0	911	30.31
08/04 04:05:00	24.3583	21.6636	20.7895	20.3011	20.9173	20.0079	467148	0	19.9367	0	912	29.14
08/04 04:10:00	24.3167	21.635	20.7528	20.263	20.8808	19.969	466837	0	19.9367	0	913	29.14
08/04 04:15:00	24.275	21.6065	20.7165	20.2253	20.8447	19.9447	466279	0	19.9367	0	914	29.14
08/04 04:20:00	24.2333	21.5783	20.6807	20.1881	20.809	19.9404	465304	0	19.9367	0	915	29.14
08/04 04:25:00	24.1917	21.5508	20.6462	20.1523	20.7745	19.9396	464254	0	19.9367	0	916	29.14
08/04 04:30:00	24.15	21.5239	20.6124	20.1174	20.7408	19.9395	463302	0	19.9367	0	917	29.14
08/04 04:35:00	24.1083	21.4974	20.5792	20.0831	20.7077	19.9394	462446	0	19.9367	0	918	29.14
08/04 04:40:00	24.0667	21.4715	20.5467	20.0496	20.6753	19.9395	461633	0	19.9367	0	919	29.14
08/04 04:45:00	24.025	21.4459	20.5148	20.0166	20.6434	19.9395	460855	0	19.9367	0	920	29.14
08/04 04:50:00	23.9833	21.4207	20.4834	19.9842	20.612	19.9395	460131	0	19.9367	0	921	29.14
08/04 04:55:00	23.9417	21.3959	20.4629	19.9777	20.5975	19.9395	459745	0	19.9367	0	922	29.14
08/04 05:00:00	23.9	21.3714	20.442	19.9655	20.5808	19.9396	459392	0	19.9367	0	923	29.14
08/04 05:05:00	23.9	22.1332	21.648	21.3299	21.7449	21.2897	3.09084	0	29.443	0	924	29.8
08/04 05:10:00	23.9	22.9824	22.8069	22.6153	22.8676	22.5654	3.0878	0	29.443	0	925	29.8
08/04 05:15:00	23.9	23.478	23.3968	23.2592	23.4402	23.2076	3.08378	0	29.443	0	926	29.8
08/04 05:20:00	23.9	23.7788	23.7328	23.6236	23.7666	23.573	3.08106	0	29.443	0	927	29.8
08/04 05:25:00	23.9	24.0386	24.0115	23.9244	24.0373	23.876	3.07963	0	29.443	0	928	29.8
08/04 05:30:00	23.9	24.1899	24.1723	24.0971	24.1929	24.0514	3.07925	0	29.443	0	929	29.8
08/04 05:35:00	23.9	24.3105	24.3034	24.2401	24.3203	24.1947	3.07992	0	29.443	0	930	29.8
08/04 05:40:00	23.9	24.4107	24.416	24.3655	24.4301	24.3179	3.08156	0	29.443	0	931	29.8
08/04 05:45:00	23.9	24.4979	24.5166	24.4791	24.5279	24.4282	3.08411	0	29.443	0	932	29.8
08/04 05:50:00	23.9	24.5763	24.6092	24.5847	24.6172	24.5297	3.08751	0	29.443	0	933	29.8
08/04 05:55:00	23.9	24.6481	24.6951	24.6839	24.7004	24.6235	3.08969	0	29.443	0	934	29.8
08/04 06:00:00	23.9	24.7122	24.7754	24.7772	24.7792	24.7109	3.08763	0	29.443	0	935	29.8
08/04 06:05:00	23.85	24.7689	24.85	24.8645	24.8528	24.792	4.84464	0	31.1072	0	936	31.51
08/04 06:10:00	23.8	24.8195	24.9199	24.9467	24.922	24.8678	4.83963	0	31.1072	0	937	31.51
08/04 06:15:00	23.75	24.8643	24.9859	25.0247	24.9874	24.9394	4.83891	0	31.1072	0	938	31.51
08/04 06:20:00	23.7	24.9044	25.0486	25.0995	25.0495	25.0073	4.84201	0	31.1072	0	939	31.51
08/04 06:25:00	23.65	24.94	25.1085	25.1712	25.1087	25.0721	4.84853	0	31.1072	0	940	31.51
08/04 06:30:00	23.6	24.9717	25.166	25.2401	25.1653	25.1341	4.85375	0	31.1072	0	941	31.51
08/04 06:35:00	23.55	25	25.2192	25.3014	25.2176	25.1916	4.84972	0	31.1072	0	942	31.51
08/04 06:40:00	23.5	25.0256	25.2673	25.3546	25.2641	25.2434	4.84201	0	31.1072	0	943	31.51
08/04 06:45:00	23.45	25.049	25.3109	25.4017	25.3062	25.2905	4.83888	0	31.1072	0	944	31.51
08/04 06:50:00	23.4	25.0703	25.3507	25.4438	25.3443	25.3335	4.83984	0	31.1072	0	945	31.51
08/04 06:55:00	23.35	25.09	25.3871	25.4819	25.379	25.3729	4.84444	0	31.1072	0	946	31.51
08/04 07:00:00	23.3	25.1082	25.4205	25.5165	25.4107	25.4091	4.85231	0	31.1072	0	947	31.51
08/04 07:05:00	23.3917	25.1965	25.5531	25.6525	25.5422	25.5451	6.61585	0.1	29.8837	1822.01	948	36.26
08/04 07:10:00	23.4833	25.2705	25.6661	25.7676	25.652	25.66	6.60356	0.1	29.8837	1936.15	949	36.26
08/04 07:15:00	23.575	25.3299	25.7563	25.8593	25.7414	25.7525	6.59846	0.1	29.8837	2030.33	950	36.26
08/04 07:20:00	23.6667	25.3783	25.829	25.9333	25.814	25.8272	6.60323	0.1	29.8837	2108.51	951	36.26
08/04 07:25:00	23.7583	25.4186	25.8895	25.9951	25.8742	25.8895	6.61651	0.1	29.8837	2174.78	952	36.26
08/04 07:30:00	23.85	25.453	25.9415	26.0487	25.9257	25.9432	6.6159	0.1	29.8837	2232.36	953	36.26
08/04 07:35:00	23.9417	25.4831	25.9944	26.1042	25.9779	25.9979	6.60248	0.1	29.8837	2287.13	954	36.26
08/04 07:40:00	24.0333	25.51	26.0509	26.1647	26.0335	26.0564	6.59834	0.1	29.8837	2341.42	955	36.26
08/04 07:45:00	24.125	25.5345	26.1106	26.2297	26.0922	26.1181	6.60393	0.1	29.8837	2395.84	956	36.26
08/04 07:50:00	24.2167	25.5572	26.1733	26.2986	26.1538	26.1827	6.61779	0.1	29.8837	2450.75	957	36.26
08/04 07:55:00	24.3083	25.5784	26.2386	26.3711	26.2176	26.2497	6.61579	0.1	29.8837	2506.48	958	36.26
08/04 08:00:00	24.4	25.5986	26.306	26.4472	26.2833	26.3184	6.60139	0.1	29.8837	2563.11	959	36.26
08/04 08:05:00	24.5417	24.4991	24.2632	24.1159	24.3185	23.9227	566676	0.3	23.3843	2519.21	960	44.84
08/04 08:10:00	24.6833	23.4249	23.4045	23.4032	23.4054	23.3984	485334	0.3	23.3843	581.685	961	44.84
08/04 08:15:00	24.825	23.3837	23.3896	23.3898	23.3896	23.3896	421367	0.3	23.3843	540.842	962	44.84
08/04 08:20:00	24.9667	23.3838	23.389	23.3891	23.389	23.389	407423	0.3	23.3843	540.674	963	44.84
08/04 08:25:00	25.1083	23.3839	23.3883	23.3884	23.3883	23.3883	402803	0.3	23.3843	540.494	964	44.84
08/04 08:30:00	25.25	23.384	23.3878	23.3878	23.3878	23.3878	401586	0.3	23.3843	540.365	965	44.84
08/04 08:35:00	25.3917	23.384	23.3874	23.3874	23.3874	23.3874	401529	0.3	23.3843	540.271	966	44.84
08/04 08:40:00	25.5333	23.3841	23.387	23.387	23.387	23.387	402164	0.3	23.3843	540.204	967	44.84
08/04 08:45:00	25.675	23.3842	23.3868	23.3867	23.3868	23.3868	403322	0.3	23.3843	540.158	968	44.84
08/04 08:50:00	25.8167	23.3842	23.3865	23.3865	23.3866	23.3865	404877	0.3	23.3843	540.127	969	44.84
08/04 08:55:00	25.9583	23.3843	23.3864	23.3863	23.3864	23.3864	406733	0.3	23.3843	540.109	970	44.84
08/04 09:00:00	26.1	23.3844	23.3862	23.3862	23.3862	23.3862	408840	0.3	23.3843	540.1	971	44.84
08/04 09:05:00	26.1917	23.747	24.2067	24.2566	24.1853	24.1407	348289	0.3	25.0801	1352.53	972	62.68
08/04 09:10:00	26.2833	24.1902	25.0042	25.0432	24.9851	24.8889	336318	0.3	25.0801	2670.5	973	62.68
08/04 09:15:00	26.375	24.4557	25.0809	25.0809	25.0808	25.078	332809	0.3	25.0801	3236.26	974	62.68
08/04 09:20:00	26.4667	24.5901	25.081	25.081	25.081	25.0809	328132	0.3	25.0801	3497.31	975	62.68
08/04 09:25:00	26.5583	24.6868	25.0811	25.0811	25.081	25.081	325834	0.3	25.0801	3695.27	976	62.68
08/04 09:30:00	26.65	24.7597	25.0811	25.0812	25.0811	25.0811	324760	0.3	25.0801	3850.37	977	62.68
08/04 09:35:00	26.7417	24.8168	25.0812	25.0812	25.0812	25.0812	324307	0.3	25.0801	3975.46	978	62.68
08/04 09:40:00	26.8333	24.8631	25.0813	25.0813	25.0812	25.0813	324190	0.3	25.0801	4079.38	979	62.68
08/04 09:45:00	26.925	24.902	25.0813	25.0813	25.0813	25.0813	324259	0.3	25.0801	4167.99	980	62.68
08/04 09:50:00	27.0167	24.9353	25.0814	25.0814	25.0813	25.0814	324430	0.3	25.0801	4245.24	981	62.68
08/04 09:55:00	27.1083	24.9646	25.0814	25.0814	25.0814	25.0814	324667	0.3	25.0801	4313.88	982	62.68
08/04 10:00:00	27.2	24.9907	25.0814	25.0814	25.0814	25.0814	324951	0.3	25.0801	4375.88	983	62.68
08/04 10:05:00	27.3833	24.101	24.0717	23.997	24.0836	23.9498	445015	0	23.8708	0	984	76.8
08/04 10:10:00	27.5667	23.8712	23.8726	23.8725	23.8726	23.8726	396128	0	23.8708	0	985	76.8
08/04 10:15:00	27.75	23.8712	23.8725	23.8724	23.8726	23.8725	395630	0	23.8708	0	986	76.8
08/04 10:20:00	27.9333	23.8712	23.8723	23.8722	23.8724	23.8723	397095	0	23.8708	0	987	76.8
08/04 10:25:00	28.1167	23.8712	23.8722	23.8721	23.8722	23.8722	399329	0	23.8708	0	988	76.8
08/04 10:30:00	28.3	23.8711	23.8721	23.872	23.8721	23.8721	401753	0	23.8708	0	989	76.8
08/04 10:35:00	28.4833	23.8711	23.872	23.8719	23.872	23.872	404284	0	23.8708	0	990	76.8
08/04 10:40:00	28.6667	23.8711	23.8719	23.8719	23.872	23.8719	406918	0	23.8708	0	991	76.8
08/04 10:45:00	28.85	23.8711	23.8717	23.8718	23.8719	23.8719	407848	0	23.8708	0	992	76.8
08/04 10:50:00	29.0333	23.8711	23.8716	23.8718	23.8718	23.8718	408807	0	23.8708	0	993	76.8
08/04 10:55:00	29.2167	23.8711	23.8716	23.8717	23.8718	23.8718	410486	0	23.8708	0	994	76.8
08/04 11:00:00	29.4	23.8711	23.8716	23.8716	23.8718	23.8718	411377	0	23.8708	0	995	76.8
08/04 11:05:00	29.45	24.1488	24.274	24.2729	24.272	24.2715	372521	0	24.2781	0	996	84.75
08/04 11:10:00	29.5	24.2774	24.2786	24.2785	24.2787	24.2787	373108	0	24.2781	0	997	84.75
08/04 11:15:00	29.55	24.2782	24.2787	24.2786	24.2788	24.2788	379884	0	24.2781	0	998	84.75
08/04 11:20:00	29.6	24.2782	24.2787	24.2787	24.2788	24.2788	382940	0	24.2781	0	999	84.75
08/04 11:25:00	29.65	24.2782	24.2788	24.2787	24.2789	24.2789	383891	0	24.2781	0	1000	84.75
08/04 11:30:00	29.7	24.2782	24.2788	24.2788	24.2789	24.2789	384251	0	24.2781	0	1001	84.75
08/04 11:35:00	29.75	24.2782	24.2788	24.2788	24.2789	24.2789	384269	0	24.2781	0	1002	84.75
08/04 11:40:00	29.8	24.2782	24.2789	24.279	24.2789	24.2789	384864	0	24.2781	0	1003	84.75
08/04 11:45:00	29.85	24.2783	24.2789	24.279	24.2789	24.279	385647	0	24.2781	0	1004	84.75
08/04 11:50:00	29.9	24.2783	24.279	24.2791	24.279	24.279	386175	0	24.2781	0	1005	84.75
08/04 11:55:00	29.95	24.2783	24.279	24.279	24.279	24.279	386331	0	24.2781	0	1006	84.75
08/04 12:00:00	30	24.2783	24.279	24.279	24.279	24.279	386422	0	24.2781	0	1007	84.75
08/04 12:05:00	30.05	24.4589	25.0273	25.1188	25.1513	25.1372	350495	0.3	25.4304	3268.66	1008	94.21
08/04 12:10:00	30.1	24.7159	25.4286	25.4311	25.431	25.431	344718	0.3	25.4304	4163.07	1009	94.21
08/04 12:15:00	30.15	24.8279	25.431	25.4312	25.4311	25.431	341881	0.3	25.4304	4407.49	1010	94.21
08/04 12:20:00	30.2	24.9077	25.4312	25.4313	25.4312	25.4311	340857	0.3	25.4304	4588.59	1011	94.21
08/04 12:25:00	30.25	24.9676	25.4313	25.4313	25.4313	25.4311	341038	0.3	25.4304	4728.37	1012	94.21
08/04 12:30:00	30.3	25.0145	25.4314	25.4314	25.4313	25.4312	341915	0.3	25.4304	4840.17	1013	94.21
08/04 12:35:00	30.35	25.0526	25.4315	25.4315	25.4314	25.4313	343128	0.3	25.4304	4932.61	1014	94.21
08/04 12:40:00	30.4	25.0845	25.4315	25.4315	25.4314	25.4314	344478	0.3	25.4304	5011.19	1015	94.21
08/04 12:45:00	30.45	25.112	25.4315	25.4315	25.4315	25.4314	345833	0.3	25.4304	5079.58	1016	94.21
08/04 12:50:00	30.5	25.1361	25.4316	25.4316	25.4315	25.4315	347185	0.3	25.4304	5140.19	1017	94.21
08/04 12:55:00	30.55	25.1576	25.4316	25.4316	25.4315	25.4315	348553	0.3	25.4304	5194.74	1018	94.21
08/04 13:00:00	30.6	25.1771	25.4316	25.4316	25.4316	25.4316	349925	0.3	25.4304	5244.51	1019	94.21
08/04 13:05:00	30.6	25.142	25.4316	25.4316	25.4315	25.4316	350351	0.3	25.4304	5155.08	1020	104.17
08/04 13:10:00	30.6	25.1151	25.4316	25.4316	25.4316	25.4316	350494	0.3	25.4304	5087.42	1021	104.17
08/04 13:15:00	30.6	25.0973	25.4316	25.4316	25.4316	25.4317	350715	0.3	25.4304	5042.98	1022	104.17
08/04 13:20:00	30.6	25.0861	25.4317	25.4317	25.4316	25.4317	350945	0.3	25.4304	5015.26	1023	104.17
08/04 13:25:00	30.6	25.0796	25.4317	25.4317	25.4316	25.4317	351174	0.3	25.4304	4999.36	1024	104.17
08/04 13:30:00	30.6	25.0765	25.4317	25.4317	25.4316	25.4318	351398	0.3	25.4304	4991.75	1025	104.17
08/04 13:35:00	30.6	25.0758	25.4317	25.4317	25.4316	25.4318	351572	0.3	25.4304	4989.92	1026	104.17
08/04 13:40:00	30.6	25.0767	25.4317	25.4317	25.4317	25.4318	351687	0.3	25.4304	4992.12	1027	104.17
08/04 13:45:00	30.6	25.0787	25.4317	25.4317	25.4317	25.4318	351756	0.3	25.4304	4997.06	1028	104.17
08/04 13:50:00	30.6	25.0814	25.4317	25.4317	25.4317	25.4318	351789	0.3	25.4304	5003.86	1029	104.17
08/04 13:55:00	30.6	25.0847	25.4317	25.4317	25.4317	25.4318	351788	0.3	25.4304	5011.92	1030	104.17
08/04 14:00:00	30.6	25.0883	25.4317	25.4317	25.4317	25.4318	351753	0.3	25.4304	5020.8	1031	104.17
08/04 14:05:00	30.6417	25.0921	25.4317	25.4317	25.4317	25.4318	351932	0.3	25.4304	5030.22	1032	113.75
08/04 14:10:00	30.6833	25.0958	25.4316	25.4317	25.4317	25.4318	352327	0.3	25.4304	5039.43	1033	113.75
08/04 14:15:00	30.725	25.0996	25.4316	25.4317	25.4317	25.4318	352844	0.3	25.4304	5049	1034	113.75
08/04 14:20:00	30.7667	25.1036	25.4316	25.4317	25.4317	25.4318	353415	0.3	25.4304	5058.78	1035	113.75
08/04 14:25:00	30.8083	25.1075	25.4316	25.4317	25.4317	25.4318	353998	0.3	25.4304	5068.65	1036	113.75
08/04 14:30:00	30.85	25.1115	25.4316	25.4317	25.4317	25.4318	354585	0.3	25.4304	5078.54	1037	113.75
08/04 14:35:00	30.8917	25.1154	25.4316	25.4317	25.4317	25.4318	355277	0.3	25.4304	5088.39	1038	113.75
08/04 14:40:00	30.9333	25.1194	25.4317	25.4317	25.4317	25.4318	356095	0.3	25.4304	5098.27	1039	113.75
08/04 14:45:00	30.975	25.1234	25.4317	25.4317	25.4317	25.4319	357003	0.3	25.4304	5108.3	1040	113.75
08/04 14:50:00	31.0167	25.1274	25.4317	25.4318	25.4317	25.4319	357980	0.3	25.4304	5118.53	1041	113.75
08/04 14:55:00	31.0583	25.1316	25.4317	25.4318	25.4317	25.4319	359007	0.3	25.4304	5129.02	1042	113.75
08/04 15:00:00	31.1	25.1359	25.4317	25.4318	25.4317	25.4319	360070	0.3	25.4304	5139.79	1043	113.75
08/04 15:05:00	31.1	25.1204	25.4317	25.4318	25.4317	25.4319	360583	0.2	25.4304	3400.6	1044	119.63
08/04 15:10:00	31.1	25.1116	25.4317	25.4317	25.4317	25.4319	360904	0.2	25.4304	3385.95	1045	119.63
08/04 15:15:00	31.1	25.1071	25.4316	25.4317	25.4317	25.4319	361257	0.2	25.4304	3378.4	1046	119.63
08/04 15:20:00	31.1	25.1054	25.4316	25.4317	25.4317	25.4319	361596	0.2	25.4304	3375.49	1047	119.63
08/04 15:25:00	31.1	25.1055	25.4316	25.4317	25.4317	25.4318	361922	0.2	25.4304	3375.67	1048	119.63
08/04 15:30:00	31.1	25.1068	25.4316	25.4317	25.4317	25.4318	362238	0.2	25.4304	3377.9	1049	119.63
08/04 15:35:00	31.1	25.109	25.4316	25.4317	25.4317	25.4318	362423	0.2	25.4304	3381.53	1050	119.63
08/04 15:40:00	31.1	25.1117	25.4316	25.4317	25.4317	25.4318	362451	0.2	25.4304	3386.06	1051	119.63
08/04 15:45:00	31.1	25.1148	25.4316	25.4317	25.4316	25.4318	362373	0.2	25.4304	3391.13	1052	119.63
08/04 15:50:00	31.1	25.118	25.4317	25.4316	25.4316	25.4317	362711	0.2	25.4304	3396.53	1053	119.63
08/04 15:55:00	31.1	25.1215	25.4317	25.4316	25.4316	25.4317	363313	0.2	25.4304	3402.47	1054	119.63
08/04 16:00:00	31.1	25.1255	25.4317	25.4316	25.4316	25.4317	363697	0.2	25.4304	3409.01	1055	119.63
08/04 16:05:00	31.1	25.1039	25.4317	25.4316	25.4316	25.4317	363123	0.2	25.4304	3372.95	1056	124.27
08/04 16:10:00	31.1	25.0865	25.4317	25.4316	25.4316	25.4317	362243	0.2	25.4304	3344.26	1057	124.27
08/04 16:15:00	31.1	25.0746	25.4317	25.4316	25.4316	25.4316	361407	0.2	25.4304	3324.68	1058	124.27
08/04 16:20:00	31.1	25.0665	25.4317	25.4316	25.4316	25.4316	360551	0.2	25.4304	3311.23	1059	124.27
08/04 16:25:00	31.1	25.0608	25.4317	25.4316	25.4316	25.4316	359665	0.2	25.4304	3301.93	1060	124.27
08/04 16:30:00	31.1	25.0568	25.4316	25.4316	25.4316	25.4316	358761	0.2	25.4304	3295.46	1061	124.27
08/04 16:35:00	31.1	25.054	25.4316	25.4316	25.4316	25.4316	357826	0.2	25.4304	3290.88	1062	124.27
08/04 16:40:00	31.1	25.052	25.4316	25.4316	25.4315	25.4316	356781	0.2	25.4304	3287.59	1063	124.27
08/04 16:45:00	31.1	25.0505	25.4316	25.4316	25.4315	25.4316	355734	0.2	25.4304	3285.11	1064	124.27
08/04 16:50:00	31.1	25.0493	25.4316	25.4316	25.4315	25.4316	354739	0.2	25.4304	3283.18	1065	124.27
08/04 16:55:00	31.1	25.0483	25.4316	25.4316	25.4315	25.4316	353776	0.2	25.4304	3281.64	1066	124.27
08/04 17:00:00	31.1	25.0476	25.4316	25.4315	25.4315	25.4316	352833	0.2	25.4304	3280.38	1067	124.27
08/04 17:05:00	31.0083	25.0272	25.4317	25.4317	25.4317	25.4318	345169	0.1	25.4304	1623.8	1068	111.09
08/04 17:10:00	30.9167	25.0139	25.4317	25.4317	25.4317	25.4317	342969	0.1	25.4304	1613.02	1069	111.09
08/04 17:15:00	30.825	25.0048	25.4316	25.4316	25.4316	25.4317	340307	0.1	25.4304	1605.75	1070	111.09
08/04 17:20:00	30.7333	24.9985	25.4316	25.4316	25.4316	25.4316	338810	0.1	25.4304	1600.68	1071	111.09
08/04 17:25:00	30.6417	24.9939	25.4316	25.4316	25.4316	25.4316	338018	0.1	25.4304	1597.03	1072	111.09
08/04 17:30:00	30.55	24.9905	25.4315	25.4315	25.4315	25.4315	337626	0.1	25.4304	1594.29	1073	111.09
08/04 17:35:00	30.4583	24.9878	25.4315	25.4315	25.4315	25.4315	337463	0.1	25.4304	1592.16	1074	111.09
08/04 17:40:00	30.3667	24.9856	25.4315	25.4315	25.4315	25.4315	337430	0.1	25.4304	1590.43	1075	111.09
08/04 17:45:00	30.275	24.9838	25.4315	25.4315	25.4315	25.4315	337469	0.1	25.4304	1588.96	1076	111.09
08/04 17:50:00	30.1833	24.9822	25.4315	25.4315	25.4315	25.4314	337546	0.1	25.4304	1587.68	1077	111.09
08/04 17:55:00	30.0917	24.9807	25.4314	25.4314	25.4315	25.4314	337644	0.1	25.4304	1586.51	1078	111.09
08/04 18:00:00	30	24.9793	25.4314	25.4314	25.4315	25.4314	337748	0.1	25.4304	1585.42	1079	111.09
08/04 18:05:00	29.9083	24.9582	25.4314	25.4315	25.4315	25.4314	337790	0	25.4304	0	1080	101.81
08/04 18:10:00	29.8167	24.9443	25.4316	25.4317	25.4317	25.432	337693	0	25.4304	0	1081	101.81
08/04 18:15:00	29.725	24.9358	25.4318	25.4318	25.4319	25.4324	337783	0	25.4304	0	1082	101.81
08/04 18:20:00	29.6333	24.9313	25.4319	25.432	25.432	25.4326	337654	0	25.4304	0	1083	101.81
08/04 18:25:00	29.5417	24.9292	25.432	25.4321	25.4321	25.4328	337501	0	25.4304	0	1084	101.81
08/04 18:30:00	29.45	24.9284	25.4321	25.4322	25.4322	25.4329	337323	0	25.4304	0	1085	101.81
08/04 18:35:00	29.3583	24.9282	25.4322	25.4323	25.4323	25.433	337116	0	25.4304	0	1086	101.81
08/04 18:40:00	29.2667	24.9279	25.4323	25.4324	25.4324	25.433	336921	0	25.4304	0	1087	101.81
08/04 18:45:00	29.175	24.9276	25.4323	25.4325	25.4325	25.4331	336718	0	25.4304	0	1088	101.81
08/04 18:50:00	29.0833	24.9269	25.4324	25.4325	25.4325	25.4331	336502	0	25.4304	0	1089	101.81
08/04 18:55:00	28.9917	24.926	25.4325	25.4326	25.4326	25.4331	336278	0	25.4304	0	1090	101.81
08/04 19:00:00	28.9	24.9249	25.4325	25.4326	25.4327	25.4331	336044	0	25.4304	0	1091	101.81
08/04 19:05:00	28.85	25.0431	25.7928	25.8224	25.8384	26.0497	3.08047	0	29.9679	0	1092	88.57
08/04 19:10:00	28.8	25.2086	26.2097	26.2658	26.2885	26.672	3.07931	0	29.9679	0	1093	88.57
08/04 19:15:00	28.75	25.3278	26.4457	26.5118	26.5342	26.9661	3.07929	0	29.9679	0	1094	88.57
08/04 19:20:00	28.7	25.3978	26.5505	26.619	26.6393	27.0842	3.08024	0	29.9679	0	1095	88.57
08/04 19:25:00	28.65	25.4582	26.6193	26.6875	26.7049	27.1518	3.08214	0	29.9679	0	1096	88.57
08/04 19:30:00	28.6	25.5087	26.6691	26.7345	26.7496	27.1921	3.08493	0	29.9679	0	1097	88.57
08/04 19:35:00	28.55	25.5487	26.7053	26.7694	26.7791	27.2164	3.08856	0	29.9679	0	1098	88.57
08/04 19:40:00	28.5	25.5802	26.731	26.7954	26.7985	27.2298	3.08953	0	29.9679	0	1099	88.57
08/04 19:45:00	28.45	25.6051	26.7496	26.8146	26.8115	27.2367	3.08637	0	29.9679	0	1100	88.57
08/04 19:50:00	28.4	25.625	26.7633	26.8287	26.8203	27.2393	3.08278	0	29.9679	0	1101	88.57
08/04 19:55:00	28.35	25.6412	26.7735	26.8393	26.8262	27.2393	3.08047	0	29.9679	0	1102	88.57
08/04 20:00:00	28.3	25.6547	26.7813	26.8472	26.8303	27.2378	3.07934	0	29.9679	0	1103	88.57
08/04 20:05:00	28.2583	25.6661	26.7878	26.8535	26.8334	27.2357	3.95932	0	29.9679	0	1104	85.06
08/04 20:10:00	28.2167	25.6763	26.7932	26.8584	26.8355	27.2332	3.96137	0	29.9679	0	1105	85.06
08/04 20:15:00	28.175	25.6852	26.7976	26.8624	26.8369	27.2305	3.96534	0	29.9679	0	1106	85.06
08/04 20:20:00	28.1333	25.6932	26.8013	26.8654	26.8377	27.2278	3.97108	0	29.9679	0	1107	85.06
08/04 20:25:00	28.0917	25.7006	26.8044	26.8678	26.838	27.2251	3.97167	0	29.9679	0	1108	85.06
08/04 20:30:00	28.05	25.7074	26.8069	26.8695	26.8379	27.2223	3.96603	0	29.9679	0	1109	85.06
08/04 20:35:00	28.0083	25.7137	26.8089	26.8707	26.8375	27.2196	3.96134	0	29.9679	0	1110	85.06
08/04 20:40:00	27.9667	25.7198	26.8105	26.8715	26.8367	27.2169	3.95919	0	29.9679	0	1111	85.06
08/04 20:45:00	27.925	25.7255	26.8117	26.8718	26.8357	27.2142	3.95932	0	29.9679	0	1112	85.06
08/04 20:50:00	27.8833	25.731	26.8126	26.8718	26.8344	27.2115	3.96155	0	29.9679	0	1113	85.06
08/04 20:55:00	27.8417	25.7363	26.8132	26.8714	26.833	27.2089	3.96568	0	29.9679	0	1114	85.06
08/04 21:00:00	27.8	25.7414	26.8136	26.8708	26.8313	27.2061	3.97157	0	29.9679	0	1115	85.06
08/04 21:05:00	27.8417	25.7464	26.8159	26.8722	26.8318	27.2058	2.20737	0	29.9679	0	1116	79.44
08/04 21:10:00	27.8833	25.7508	26.8194	26.8749	26.8335	27.2069	2.2053	0	29.9679	0	1117	79.44
08/04 21:15:00	27.925	25.7553	26.8236	26.8783	26.8361	27.2089	2.20324	0	29.9679	0	1118	79.44
08/04 21:20:00	27.9667	25.7597	26.8283	26.8821	26.8391	27.2115	2.20168	0	29.9679	0	1119	79.44
08/04 21:25:00	28.0083	25.7641	26.8331	26.8865	26.8425	27.2145	2.20059	0	29.9679	0	1120	79.44
08/04 21:30:00	28.05	25.7685	26.8381	26.8912	26.8462	27.2178	2.19995	0	29.9679	0	1121	79.44
08/04 21:35:00	28.0917	25.7729	26.8432	26.8959	26.85	27.2213	2.19973	0	29.9679	0	1122	79.44
08/04 21:40:00	28.1333	25.7773	26.8484	26.9005	26.8538	27.2249	2.19991	0	29.9679	0	1123	79.44
08/04 21:45:00	28.175	25.7816	26.8535	26.9051	26.8578	27.2287	2.20048	0	29.9679	0	1124	79.44
08/04 21:50:00	28.2167	25.7859	26.8586	26.9097	26.8618	27.2318	2.2014	0	29.9679	0	1125	79.44
08/04 21:55:00	28.2583	25.7901	26.8637	26.9142	26.8659	27.2353	2.20267	0	29.9679	0	1126	79.44
08/04 22:00:00	28.3	25.7944	26.8687	26.9187	26.8699	27.2388	2.20427	0	29.9679	0	1127	79.44
08/04 22:05:00	28.3	25.7986	26.8726	26.922	26.8728	27.2412	2.20619	0	29.9679	0	1128	65.14
08/04 22:10:00	28.3	25.8028	26.8759	26.9246	26.8749	27.2434	2.2073	0	29.9679	0	1129	65.14
08/04 22:15:00	28.3	25.807	26.8786	26.9267	26.8765	27.245	2.20611	0	29.9679	0	1130	65.14
08/04 22:20:00	28.3	25.8111	26.8809	26.9284	26.8777	27.2462	2.20385	0	29.9679	0	1131	65.14
08/04 22:25:00	28.3	25.8152	26.883	26.9292	26.8786	27.247	2.2021	0	29.9679	0	1132	65.14
08/04 22:30:00	28.3	25.8193	26.8848	26.9299	26.8794	27.2476	2.20084	0	29.9679	0	1133	65.14
08/04 22:35:00	28.3	25.8234	26.8865	26.9305	26.88	27.2481	2.20003	0	29.9679	0	1134	65.14
08/04 22:40:00	28.3	25.8274	26.8881	26.9311	26.8805	27.2483	2.19965	0	29.9679	0	1135	65.14
08/04 22:45:00	28.3	25.8315	26.8895	26.9316	26.8809	27.2485	2.19969	0	29.9679	0	1136	65.14
08/04 22:50:00	28.3	25.8355	26.8908	26.932	26.8812	27.2486	2.20011	0	29.9679	0	1137	65.14
08/04 22:55:00	28.3	25.8394	26.8921	26.9324	26.8814	27.2485	2.2009	0	29.9679	0	1138	65.14
08/04 23:00:00	28.3	25.8434	26.8933	26.9327	26.8816	27.2484	2.20204	0	29.9679	0	1139	65.14
08/04 23:05:00	27.75	25.8473	26.882	26.9202	26.8692	27.2352	2.20352	0	29.9679	0	1140	46.77
08/04 23:10:00	27.2	25.8512	26.8624	26.8989	26.849	27.2134	2.20532	0	29.9679	0	1141	46.77
08/04 23:15:00	26.65	25.855	26.837	26.8717	26.8227	27.1857	2.20736	0	29.9679	0	1142	46.77
08/04 23:20:00	26.1	25.8589	26.8072	26.8398	26.7915	27.1532	2.20703	0	29.9679	0	1143	46.77
08/04 23:25:00	25.55	25.8626	26.7737	26.804	26.7563	27.1169	2.20457	0	29.9679	0	1144	46.77
08/04 23:30:00	25	25.8663	26.7367	26.7646	26.7173	27.0768	2.20263	0	29.9679	0	1145	46.77
08/04 23:35:00	24.45	25.8698	26.6967	26.7211	26.6753	27.0331	2.20118	0	29.9679	0	1146	46.77
08/04 23:40:00	23.9	25.8732	26.6532	26.6751	26.6306	26.9886	2.20021	0	29.9679	0	1147	46.77
08/04 23:45:00	23.35	25.8765	26.6072	26.6289	26.5853	26.9438	2.19967	0	29.9679	0	1148	46.77
08/04 23:50:00	22.8	25.8797	26.5613	26.5829	26.54	26.8988	2.19955	0	29.9679	0	1149	46.77
08/04 23:55:00	22.25	25.8828	26.5157	26.537	26.4946	26.8535	2.19982	0	29.9679	0	1150	46.77
08/04 24:00:00	21.7	25.8857	26.4703	26.491	26.4491	26.808	2.20048	0	29.9679	0	1151	46.77
08/05 00:05:00	21.5583	25.8886	26.4352	26.4555	26.4137	26.7729	1.76051	0	29.4932	0	1152	42.25
08/05 00:10:00	21.4167	25.8912	26.4064	26.4262	26.3847	26.744	1.76134	0	29.4932	0	1153	42.25
08/05 00:15:00	21.275	25.8938	26.3815	26.4008	26.3595	26.7187	1.76234	0	29.4932	0	1154	42.25
08/05 00:20:00	21.1333	25.8963	26.3591	26.3777	26.3367	26.6957	1.76351	0	29.4932	0	1155	42.25
08/05 00:25:00	20.9917	25.8988	26.3382	26.3561	26.3154	26.6739	1.76485	0	29.4932	0	1156	42.25
08/05 00:30:00	20.85	25.9013	26.3184	26.3354	26.295	26.6532	1.76512	0	29.4932	0	1157	42.25
08/05 00:35:00	20.7083	25.9037	26.2992	26.3151	26.2752	26.6332	1.7639	0	29.4932	0	1158	42.25
08/05 00:40:00	20.5667	25.9062	26.2803	26.2954	26.2558	26.6135	1.76246	0	29.4932	0	1159	42.25
08/05 00:45:00	20.425	25.9086	26.2619	26.2757	26.2366	26.594	1.7613	0	29.4932	0	1160	42.25
08/05 00:50:00	20.2833	25.911	26.2435	26.2562	26.2174	26.5747	1.76039	0	29.4932	0	1161	42.25
08/05 00:55:00	20.1417	25.9134	26.2255	26.2368	26.1982	26.5555	1.75973	0	29.4932	0	1162	42.25
08/05 01:00:00	20	25.9158	26.2073	26.2174	26.1791	26.5364	1.7593	0	29.4932	0	1163	42.25
08/05 01:05:00	20.05	25.9181	26.1944	26.2034	26.1654	26.5229	1.7591	0	31.2085	0	1164	34.87
08/05 01:10:00	20.1	25.9205	26.1847	26.1929	26.1551	26.5125	1.75911	0	31.2085	0	1165	34.87
08/05 01:15:00	20.15	25.9228	26.1772	26.1844	26.1468	26.5038	1.75933	0	31.2085	0	1166	34.87
08/05 01:20:00	20.2	25.9252	26.171	26.1776	26.1402	26.4966	1.75975	0	31.2085	0	1167	34.87
08/05 01:25:00	20.25	25.9276	26.1658	26.1717	26.1345	26.4902	1.76036	0	31.2085	0	1168	34.87
08/05 01:30:00	20.3	25.93	26.1614	26.1666	26.1296	26.4844	1.76115	0	31.2085	0	1169	34.87
08/05 01:35:00	20.35	25.9324	26.1577	26.1621	26.1252	26.4792	1.76212	0	31.2085	0	1170	34.87
08/05 01:40:00	20.4	25.9348	26.1544	26.1581	26.1214	26.4745	1.76326	0	31.2085	0	1171	34.87
08/05 01:45:00	20.45	25.9372	26.1515	26.1546	26.118	26.47	1.76457	0	31.2085	0	1172	34.87
08/05 01:50:00	20.5	25.9397	26.1489	26.1513	26.1149	26.466	1.76515	0	31.2085	0	1173	34.87
08/05 01:55:00	20.55	25.9421	26.1467	26.1484	26.1121	26.4622	1.76423	0	31.2085	0	1174	34.87
08/05 02:00:00	20.6	25.9446	26.1447	26.1458	26.1095	26.4586	1.76274	0	31.2085	0	1175	34.87
08/05 02:05:00	20.6	25.9471	26.1416	26.142	26.1059	26.4539	1.76152	0	30.9946	0	1176	31.1
08/05 02:10:00	20.6	25.9496	26.1378	26.1375	26.1017	26.4487	1.76056	0	30.9946	0	1177	31.1
08/05 02:15:00	20.6	25.9522	26.1337	26.1328	26.097	26.443	1.75985	0	30.9946	0	1178	31.1
08/05 02:20:00	20.6	25.9547	26.1293	26.1278	26.0922	26.4373	1.75937	0	30.9946	0	1179	31.1
08/05 02:25:00	20.6	25.9572	26.1248	26.1227	26.0873	26.4314	1.75913	0	30.9946	0	1180	31.1
08/05 02:30:00	20.6	25.9598	26.1203	26.1176	26.0824	26.4255	1.7591	0	30.9946	0	1181	31.1
08/05 02:35:00	20.6	25.9623	26.1157	26.1124	26.0774	26.4196	1.75927	0	30.9946	0	1182	31.1
08/05 02:40:00	20.6	25.9649	26.1112	26.1073	26.0725	26.4137	1.75965	0	30.9946	0	1183	31.1
08/05 02:45:00	20.6	25.9674	26.1067	26.1022	26.0675	26.4079	1.76022	0	30.9946	0	1184	31.1
08/05 02:50:00	20.6	25.9699	26.1021	26.0972	26.0627	26.402	1.76098	0	30.9946	0	1185	31.1
08/05 02:55:00	20.6	25.9724	26.0977	26.0922	26.0578	26.3962	1.76191	0	30.9946	0	1186	31.1
08/05 03:00:00	20.6	25.975	26.0932	26.0872	26.053	26.3904	1.76302	0	30.9946	0	1187	31.1
08/05 03:05:00	20.55	24.7362	24.1034	23.9414	24.1344	23.9826	434520	0	23.4986	0	1188	27.76
08/05 03:10:00	20.5	23.5737	23.5088	23.5073	23.509	23.5087	363910	0	23.4986	0	1189	27.76
08/05 03:15:00	20.45	23.5	23.508	23.508	23.5079	23.5083	313136	0	23.4986	0	1190	27.76
08/05 03:20:00	20.4	23.4998	23.5067	23.5066	23.5066	23.5068	296047	0	23.4986	0	1191	27.76
08/05 03:25:00	20.35	23.4996	23.5053	23.5052	23.5053	23.5053	285181	0	23.4986	0	1192	27.76
08/05 03:30:00	20.3	23.4995	23.5042	23.5042	23.5042	23.5041	277304	0	23.4986	0	1193	27.76
08/05 03:35:00	20.25	23.4994	23.5034	23.5033	23.5034	23.5032	271193	0	23.4986	0	1194	27.76
08/05 03:40:00	20.2	23.4993	23.5027	23.5027	23.5027	23.5025	266281	0	23.4986	0	1195	27.76
08/05 03:45:00	20.15	23.4992	23.5022	23.5021	23.5022	23.502	262208	0	23.4986	0	1196	27.76
08/05 03:50:00	20.1	23.4991	23.5018	23.5017	23.5018	23.5015	258747	0	23.4986	0	1197	27.76
08/05 03:55:00	20.05	23.4991	23.5014	23.5014	23.5014	23.5012	255738	0	23.4986	0	1198	27.76
08/05 04:00:00	20	23.499	23.5011	23.5011	23.5011	23.5009	253076	0	23.4986	0	1199	27.76
08/05 04:05:00	20.05	22.9712	22.7906	22.7879	22.8073	22.7884	352799	0	22.7716	0	1200	26.11
08/05 04:10:00	20.1	22.7727	22.7747	22.7747	22.7747	22.7744	310276	0	22.7716	0	1201	26.11
08/05 04:15:00	20.15	22.7722	22.7742	22.7742	22.7742	22.7739	302776	0	22.7716	0	1202	26.11
08/05 04:20:00	20.2	22.772	22.7738	22.7738	22.7739	22.7736	300819	0	22.7716	0	1203	26.11
08/05 04:25:00	20.25	22.7719	22.7736	22.7736	22.7736	22.7734	299178	0	22.7716	0	1204	26.11
08/05 04:30:00	20.3	22.7719	22.7734	22.7734	22.7734	22.7732	297848	0	22.7716	0	1205	26.11
08/05 04:35:00	20.35	22.7718	22.7732	22.7732	22.7732	22.7731	296815	0	22.7716	0	1206	26.11
08/05 04:40:00	20.4	22.7717	22.7731	22.7731	22.7731	22.773	296055	0	22.7716	0	1207	26.11
08/05 04:45:00	20.45	22.7717	22.773	22.7731	22.7731	22.773	295520	0	22.7716	0	1208	26.11
08/05 04:50:00	20.5	22.7717	22.773	22.773	22.773	22.7729	295178	0	22.7716	0	1209	26.11
08/05 04:55:00	20.55	22.7716	22.773	22.773	22.773	22.7729	295566	0	22.7716	0	1210	26.11
08/05 05:00:00	20.6	22.7716	22.7729	22.773	22.773	22.7729	296077	0	22.7716	0	1211	26.11
08/05 05:05:00	20.6417	23.3251	23.4735	23.4946	23.4703	23.5397	1.76329	0	29.7354	0	1212	25.51
08/05 05:10:00	20.6833	23.9919	24.2133	24.2488	24.2062	24.3367	1.76458	0	29.7354	0	1213	25.51
08/05 05:15:00	20.725	24.3276	24.5386	24.5774	24.5292	24.6829	1.76566	0	29.7354	0	1214	25.51
08/05 05:20:00	20.7667	24.599	24.7803	24.8194	24.7681	24.9396	1.76448	0	29.7354	0	1215	25.51
08/05 05:25:00	20.8083	24.7471	24.9063	24.944	24.8919	25.0717	1.76296	0	29.7354	0	1216	25.51
08/05 05:30:00	20.85	24.8597	25	25.0353	24.9834	25.1692	1.76172	0	29.7354	0	1217	25.51
08/05 05:35:00	20.8917	24.9486	25.0764	25.1144	25.059	25.2487	1.76073	0	29.7354	0	1218	25.51
08/05 05:40:00	20.9333	25.0213	25.1429	25.1887	25.126	25.318	1.76	0	29.7354	0	1219	25.51
08/05 05:45:00	20.975	25.083	25.2031	25.2601	25.1875	25.3808	1.7595	0	29.7354	0	1220	25.51
08/05 05:50:00	21.0167	25.1377	25.2593	25.3299	25.2452	25.4394	1.75923	0	29.7354	0	1221	25.51
08/05 05:55:00	21.0583	25.1883	25.3129	25.398	25.3003	25.4952	1.75918	0	29.7354	0	1222	25.51
08/05 06:00:00	21.1	25.2338	25.3648	25.4667	25.3533	25.549	1.75934	0	29.7354	0	1223	25.51
08/05 06:05:00	21.15	25.2741	25.4152	25.5352	25.4049	25.6013	1.7597	0	31.2901	0	1224	24
08/05 06:10:00	21.2	25.3098	25.4645	25.6036	25.4559	25.6528	1.76025	0	31.2901	0	1225	24
08/05 06:15:00	21.25	25.3416	25.5137	25.6719	25.5062	25.7036	1.76099	0	31.2901	0	1226	24
08/05 06:20:00	21.3	25.3696	25.5625	25.741	25.556	25.7538	1.7619	0	31.2901	0	1227	24
08/05 06:25:00	21.35	25.3943	25.6112	25.8101	25.6053	25.8036	1.76299	0	31.2901	0	1228	24
08/05 06:30:00	21.4	25.4162	25.6598	25.8789	25.6543	25.8532	1.76425	0	31.2901	0	1229	24
08/05 06:35:00	21.45	25.4358	25.7071	25.9562	25.7013	25.9013	1.76528	0	31.2901	0	1230	24
08/05 06:40:00	21.5	25.4537	25.7538	26.0688	25.7494	25.9486	1.76478	0	31.2901	0	1231	24
08/05 06:45:00	21.55	25.4702	25.7997	26.197	25.7964	25.9949	1.7632	0	31.2901	0	1232	24
08/05 06:50:00	21.6	25.4857	25.8449	26.33	25.8417	26.0401	1.7619	0	31.2901	0	1233	24
08/05 06:55:00	21.65	25.5005	25.8899	26.4683	25.8857	26.0846	1.76086	0	31.2901	0	1234	24
08/05 07:00:00	21.7	25.5146	25.9347	26.612	25.9287	26.1285	1.76008	0	31.2901	0	1235	24
08/05 07:05:00	21.7917	25.5479	25.9983	26.7787	25.9899	26.1909	1.75954	0.1	31.3546	2440.37	1236	28.05
08/05 07:10:00	21.8833	25.5752	26.057	26.7753	26.0464	26.2484	1.75922	0.1	31.3546	2490.17	1237	28.05
08/05 07:15:00	21.975	25.5978	26.1118	26.7706	26.0981	26.3025	1.75913	0.1	31.3546	2534.05	1238	28.05
08/05 07:20:00	22.0667	25.6168	26.1637	26.7718	26.1463	26.3539	1.75925	0.1	31.3546	2574.21	1239	28.05
08/05 07:25:00	22.1583	25.6332	26.2145	26.7809	26.1927	26.4038	1.75957	0.1	31.3546	2612.39	1240	28.05
08/05 07:30:00	22.25	25.6476	26.265	26.7987	26.2383	26.4528	1.76008	0.1	31.3546	2649.7	1241	28.05
08/05 07:35:00	22.3417	25.6606	26.3163	26.818	26.284	26.5016	1.76078	0.1	31.3546	2686.21	1242	28.05
08/05 07:40:00	22.4333	25.6726	26.3684	26.8372	26.3299	26.5506	1.76166	0.1	31.3546	2722.25	1243	28.05
08/05 07:45:00	22.525	25.6838	26.4215	26.8564	26.3762	26.5998	1.76272	0.1	31.3546	2758.09	1244	28.05
08/05 07:50:00	22.6167	25.6945	26.4754	26.8754	26.4228	26.6492	1.76394	0.1	31.3546	2793.89	1245	28.05
08/05 07:55:00	22.7083	25.7048	26.5301	26.8942	26.4697	26.6987	1.76529	0.1	31.3546	2829.79	1246	28.05
08/05 08:00:00	22.8	25.7148	26.5855	26.9127	26.5167	26.7484	1.7651	0.1	31.3546	2865.87	1247	28.05
08/05 08:05:00	22.8417	24.5605	24.5613	24.526	24.5768	24.3999	404329	0.3	23.9941	2902.1	1248	34.74
08/05 08:10:00	22.8833	23.9945	24.0018	24.0021	24.0016	24.0021	294831	0.3	23.9941	1545.11	1249	34.74
08/05 08:15:00	22.925	23.9942	24.0004	24.0005	24.0002	24.0006	310648	0.3	23.9941	1543.75	1250	34.74
08/05 08:20:00	22.9667	23.9942	23.9995	23.9995	23.9995	23.9997	311376	0.3	23.9941	1543.2	1251	34.74
08/05 08:25:00	23.0083	23.9942	23.9989	23.9988	23.9989	23.999	310697	0.3	23.9941	1542.83	1252	34.74
08/05 08:30:00	23.05	23.9942	23.9985	23.9983	23.9984	23.9985	309612	0.3	23.9941	1542.56	1253	34.74
08/05 08:35:00	23.0917	23.9943	23.9981	23.998	23.998	23.9981	308643	0.3	23.9941	1542.37	1254	34.74
08/05 08:40:00	23.1333	23.9943	23.9978	23.9979	23.9977	23.9977	307833	0.3	23.9941	1542.23	1255	34.74
08/05 08:45:00	23.175	23.9943	23.9976	23.9977	23.9975	23.9975	307064	0.3	23.9941	1542.11	1256	34.74
08/05 08:50:00	23.2167	23.9943	23.9972	23.9976	23.9973	23.9973	305999	0.3	23.9941	1541.99	1257	34.74
08/05 08:55:00	23.2583	23.9943	23.997	23.9975	23.9971	23.9971	304847	0.3	23.9941	1541.9	1258	34.74
08/05 09:00:00	23.3	23.9943	23.9969	23.9974	23.997	23.997	304094	0.3	23.9941	1541.85	1259	34.74
08/05 09:05:00	23.4917	23.8112	23.8215	23.8254	23.8214	23.8225	318188	0.3	23.8039	1191.99	1260	43.74
08/05 09:10:00	23.6833	23.8045	23.808	23.809	23.808	23.8082	320079	0.3	23.8039	1175.71	1261	43.74
08/05 09:15:00	23.875	23.8045	23.8073	23.8079	23.8073	23.8074	292715	0.3	23.8039	1175.27	1262	43.74
08/05 09:20:00	24.0667	23.8045	23.8071	23.8075	23.8071	23.8071	289895	0.3	23.8039	1175.12	1263	43.74
08/05 09:25:00	24.2583	23.8045	23.807	23.8073	23.807	23.807	287753	0.3	23.8039	1175.02	1264	43.74
08/05 09:30:00	24.45	23.8044	23.8069	23.8071	23.8069	23.8069	286480	0.3	23.8039	1174.95	1265	43.74
08/05 09:35:00	24.6417	23.8044	23.8068	23.807	23.8068	23.8068	285748	0.3	23.8039	1174.88	1266	43.74
08/05 09:40:00	24.8333	23.8044	23.8068	23.8068	23.8067	23.8067	285444	0.3	23.8039	1174.83	1267	43.74
08/05 09:45:00	25.025	23.8044	23.8067	23.8067	23.8067	23.8067	285437	0.3	23.8039	1174.78	1268	43.74
08/05 09:50:00	25.2167	23.8044	23.8066	23.8066	23.8066	23.8066	285577	0.3	23.8039	1174.74	1269	43.74
08/05 09:55:00	25.4083	23.8044	23.8066	23.8065	23.8066	23.8066	285846	0.3	23.8039	1174.7	1270	43.74
08/05 10:00:00	25.6	23.8044	23.8065	23.8064	23.8065	23.8065	286190	0.3	23.8039	1174.67	1271	43.74
08/05 10:05:00	25.7333	23.1522	23.1158	23.0823	23.127	23.0186	394590	0	22.9959	0	1272	54.22
08/05 10:10:00	25.8667	22.9969	22.9991	22.9988	22.9992	22.9991	330743	0	22.9959	0	1273	54.22
08/05 10:15:00	26	22.9967	22.9988	22.9986	22.999	22.9989	327262	0	22.9959	0	1274	54.22
08/05 10:20:00	26.1333	22.9966	22.9985	22.9983	22.9986	22.9986	324500	0	22.9959	0	1275	54.22
08/05 10:25:00	26.2667	22.9965	22.9983	22.9981	22.9984	22.9984	322651	0	22.9959	0	1276	54.22
08/05 10:30:00	26.4	22.9964	22.9982	22.998	22.9983	22.9983	321062	0	22.9959	0	1277	54.22
08/05 10:35:00	26.5333	22.9964	22.9981	22.998	22.9982	22.9982	319834	0	22.9959	0	1278	54.22
08/05 10:40:00	26.6667	22.9963	22.9981	22.998	22.9981	22.9981	318868	0	22.9959	0	1279	54.22
08/05 10:45:00	26.8	22.9963	22.998	22.9979	22.9981	22.9981	318115	0	22.9959	0	1280	54.22
08/05 10:50:00	26.9333	22.9962	22.998	22.9979	22.998	22.998	317465	0	22.9959	0	1281	54.22
08/05 10:55:00	27.0667	22.9962	22.998	22.9979	22.998	22.998	316992	0	22.9959	0	1282	54.22
08/05 11:00:00	27.2	22.9962	22.998	22.9979	22.998	22.998	316650	0	22.9959	0	1283	54.22
08/05 11:05:00	27.2917	23.3757	23.8627	23.8365	23.8406	23.8438	286009	0	23.9722	0	1284	65.98
08/05 11:10:00	27.3833	23.7983	23.969	23.9683	23.9686	23.9683	286963	0	23.9722	0	1285	65.98
08/05 11:15:00	27.475	23.9708	23.9734	23.9733	23.9733	23.9734	288017	0	23.9722	0	1286	65.98
08/05 11:20:00	27.5667	23.9721	23.9737	23.9735	23.9736	23.9736	288698	0	23.9722	0	1287	65.98
08/05 11:25:00	27.6583	23.9722	23.9738	23.9737	23.9737	23.9738	289254	0	23.9722	0	1288	65.98
08/05 11:30:00	27.75	23.9722	23.974	23.9738	23.9738	23.9739	289981	0	23.9722	0	1289	65.98
08/05 11:35:00	27.8417	23.9722	23.9741	23.9738	23.9739	23.974	290737	0	23.9722	0	1290	65.98
08/05 11:40:00	27.9333	23.9722	23.9741	23.9741	23.974	23.9741	291723	0	23.9722	0	1291	65.98
08/05 11:45:00	28.025	23.9722	23.9742	23.9742	23.9741	23.9742	292717	0	23.9722	0	1292	65.98
08/05 11:50:00	28.1167	23.9722	23.9742	23.9743	23.9741	23.9742	293620	0	23.9722	0	1293	65.98
08/05 11:55:00	28.2083	23.9722	23.9742	23.9743	23.9742	23.9743	294515	0	23.9722	0	1294	65.98
08/05 12:00:00	28.3	23.9722	23.9742	23.9744	23.9742	23.9743	295411	0	23.9722	0	1295	65.98
08/05 12:05:00	28.3	23.3771	23.3737	23.3127	23.3755	23.313	363836	0.3	23.2956	521.443	1296	71.48
08/05 12:10:00	28.3	23.2958	23.2984	23.2986	23.2985	23.2985	319783	0.3	23.2956	437.661	1297	71.48
08/05 12:15:00	28.3	23.2958	23.2984	23.2986	23.2985	23.2986	319212	0.3	23.2956	437.712	1298	71.48
08/05 12:20:00	28.3	23.2958	23.2982	23.2985	23.2984	23.2985	318603	0.3	23.2956	437.672	1299	71.48
08/05 12:25:00	28.3	23.2958	23.2981	23.2984	23.2984	23.2984	318005	0.3	23.2956	437.655	1300	71.48
08/05 12:30:00	28.3	23.2958	23.2981	23.2984	23.2983	23.2984	317497	0.3	23.2956	437.649	1301	71.48
08/05 12:35:00	28.3	23.2959	23.2981	23.2984	23.2983	23.2984	316936	0.3	23.2956	437.648	1302	71.48
08/05 12:40:00	28.3	23.2959	23.298	23.2983	23.2983	23.2983	316353	0.3	23.2956	437.648	1303	71.48
08/05 12:45:00	28.3	23.2959	23.298	23.2983	23.2982	23.2983	315804	0.3	23.2956	437.649	1304	71.48
08/05 12:50:00	28.3	23.2959	23.298	23.2983	23.2982	23.2983	315295	0.3	23.2956	437.651	1305	71.48
08/05 12:55:00	28.3	23.2959	23.298	23.2983	23.2982	23.2983	314812	0.3	23.2956	437.655	1306	71.48
08/05 13:00:00	28.3	23.2959	23.298	23.2982	23.2982	23.2983	314370	0.3	23.2956	437.659	1307	71.48
08/05 13:05:00	28.2583	23.2959	23.2983	23.2982	23.2982	23.2983	314096	0.3	23.2956	437.696	1308	78.34
08/05 13:10:00	28.2167	23.2959	23.2984	23.2982	23.2982	23.2982	312619	0.3	23.2956	437.714	1309	78.34
08/05 13:15:00	28.175	23.2959	23.2983	23.2982	23.2981	23.2982	310228	0.3	23.2956	437.704	1310	78.34
08/05 13:20:00	28.1333	23.2959	23.2982	23.2981	23.2981	23.2981	307487	0.3	23.2956	437.681	1311	78.34
08/05 13:25:00	28.0917	23.2959	23.2981	23.2981	23.298	23.298	304467	0.3	23.2956	437.654	1312	78.34
08/05 13:30:00	28.05	23.2959	23.298	23.298	23.2979	23.2979	301290	0.3	23.2956	437.625	1313	78.34
08/05 13:35:00	28.0083	23.296	23.2979	23.2979	23.2978	23.2979	298400	0.3	23.2956	437.606	1314	78.34
08/05 13:40:00	27.9667	23.296	23.2977	23.2978	23.2977	23.2976	293848	0.3	23.2956	437.544	1315	78.34
08/05 13:45:00	27.925	23.2959	23.2975	23.2977	23.2976	23.2975	289780	0.3	23.2956	437.492	1316	78.34
08/05 13:50:00	27.8833	23.2959	23.2974	23.2976	23.2975	23.2974	286318	0.3	23.2956	437.465	1317	78.34
08/05 13:55:00	27.8417	23.2959	23.2974	23.2975	23.2975	23.2974	282970	0.3	23.2956	437.446	1318	78.34
08/05 14:00:00	27.8	23.2959	23.2973	23.2974	23.2974	23.2974	279750	0.3	23.2956	437.428	1319	78.34
08/05 14:05:00	27.9833	23.296	23.2973	23.2973	23.2973	23.2973	277860	0.3	23.2956	437.414	1320	80.64
08/05 14:10:00	28.1667	23.296	23.2973	23.2973	23.2973	23.2973	277127	0.3	23.2956	437.407	1321	80.64
08/05 14:15:00	28.35	23.296	23.2972	23.2973	23.2972	23.2973	277064	0.3	23.2956	437.402	1322	80.64
08/05 14:20:00	28.5333	23.296	23.2972	23.2972	23.2972	23.2973	277451	0.3	23.2956	437.401	1323	80.64
08/05 14:25:00	28.7167	23.296	23.2972	23.2972	23.2972	23.2973	278139	0.3	23.2956	437.402	1324	80.64
08/05 14:30:00	28.9	23.296	23.2972	23.2972	23.2972	23.2973	279031	0.3	23.2956	437.404	1325	80.64
08/05 14:35:00	29.0833	23.296	23.2972	23.2972	23.2972	23.2973	279847	0.3	23.2956	437.404	1326	80.64
08/05 14:40:00	29.2667	23.296	23.2972	23.2972	23.2972	23.2973	280652	0.3	23.2956	437.401	1327	80.64
08/05 14:45:00	29.45	23.296	23.2972	23.2972	23.2972	23.2973	281461	0.3	23.2956	437.398	1328	80.64
08/05 14:50:00	29.6333	23.296	23.2971	23.2972	23.2971	23.2973	282261	0.3	23.2956	437.396	1329	80.64
08/05 14:55:00	29.8167	23.296	23.2971	23.2972	23.2971	23.2973	283135	0.3	23.2956	437.396	1330	80.64
08/05 15:00:00	30	23.296	23.2971	23.2972	23.2971	23.2972	283946	0.3	23.2956	437.396	1331	80.64
08/05 15:05:00	30	23.296	23.2971	23.2971	23.2971	23.2972	283389	0.2	23.2956	291.581	1332	83.16
08/05 15:10:00	30	23.296	23.2971	23.2971	23.2971	23.2972	283706	0.2	23.2956	291.565	1333	83.16
08/05 15:15:00	30	23.296	23.297	23.2971	23.2971	23.2972	283958	0.2	23.2956	291.559	1334	83.16
08/05 15:20:00	30	23.296	23.297	23.2971	23.2971	23.2971	284149	0.2	23.2956	291.554	1335	83.16
08/05 15:25:00	30	23.2959	23.297	23.2971	23.2971	23.2971	284313	0.2	23.2956	291.551	1336	83.16
08/05 15:30:00	30	23.2959	23.297	23.2971	23.2971	23.2971	284465	0.2	23.2956	291.548	1337	83.16
08/05 15:35:00	30	23.2959	23.297	23.2971	23.2971	23.2972	284604	0.2	23.2956	291.546	1338	83.16
08/05 15:40:00	30	23.2959	23.297	23.2971	23.2971	23.2972	284730	0.2	23.2956	291.544	1339	83.16
08/05 15:45:00	30	23.2959	23.2971	23.2971	23.2971	23.2972	285261	0.2	23.2956	291.55	1340	83.16
08/05 15:50:00	30	23.2959	23.2972	23.2971	23.2971	23.2972	285770	0.2	23.2956	291.556	1341	83.16
08/05 15:55:00	30	23.2959	23.2972	23.2971	23.2971	23.2972	286040	0.2	23.2956	291.558	1342	83.16
08/05 16:00:00	30	23.2959	23.2972	23.2971	23.2971	23.2972	286279	0.2	23.2956	291.556	1343	83.16
08/05 16:05:00	29.95	23.2959	23.2972	23.2971	23.2971	23.2972	286250	0.2	23.2956	291.555	1344	87.72
08/05 16:10:00	29.9	23.2959	23.2972	23.2971	23.2971	23.2972	285967	0.2	23.2956	291.552	1345	87.72
08/05 16:15:00	29.85	23.2959	23.2971	23.2971	23.2971	23.2972	285533	0.2	23.2956	291.548	1346	87.72
08/05 16:20:00	29.8	23.2959	23.2971	23.2971	23.2971	23.2972	284993	0.2	23.2956	291.544	1347	87.72
08/05 16:25:00	29.75	23.2959	23.2971	23.2971	23.2971	23.2972	284460	0.2	23.2956	291.542	1348	87.72
08/05 16:30:00	29.7	23.2959	23.2971	23.2971	23.2971	23.2972	283836	0.2	23.2956	291.538	1349	87.72
08/05 16:35:00	29.65	23.2959	23.2971	23.2971	23.2971	23.2972	283201	0.2	23.2956	291.535	1350	87.72
08/05 16:40:00	29.6	23.2959	23.2971	23.2971	23.2971	23.2972	282584	0.2	23.2956	291.533	1351	87.72
08/05 16:45:00	29.55	23.2959	23.2971	23.2971	23.2971	23.2972	281976	0.2	23.2956	291.531	1352	87.72
08/05 16:50:00	29.5	23.2959	23.2971	23.2971	23.2971	23.2972	281373	0.2	23.2956	291.529	1353	87.72
08/05 16:55:00	29.45	23.2959	23.2971	23.2971	23.2971	23.2972	280773	0.2	23.2956	291.528	1354	87.72
08/05 17:00:00	29.4	23.2959	23.2971	23.2971	23.2971	23.2972	280182	0.2	23.2956	291.526	1355	87.72
08/05 17:05:00	29.2667	23.2959	23.297	23.2971	23.2971	23.2971	278742	0.1	23.2956	145.755	1356	85
08/05 17:10:00	29.1333	23.2959	23.297	23.297	23.297	23.2971	278145	0.1	23.2956	145.748	1357	85
08/05 17:15:00	29	23.2959	23.297	23.297	23.297	23.2971	277534	0.1	23.2956	145.745	1358	85
08/05 17:20:00	28.8667	23.2958	23.297	23.297	23.297	23.2971	276922	0.1	23.2956	145.742	1359	85
08/05 17:25:00	28.7333	23.2958	23.297	23.297	23.297	23.2971	276322	0.1	23.2956	145.74	1360	85
08/05 17:30:00	28.6	23.2958	23.297	23.297	23.297	23.2971	275731	0.1	23.2956	145.738	1361	85
08/05 17:35:00	28.4667	23.2958	23.297	23.297	23.297	23.297	275090	0.1	23.2956	145.736	1362	85
08/05 17:40:00	28.3333	23.2958	23.297	23.297	23.297	23.297	274410	0.1	23.2956	145.734	1363	85
08/05 17:45:00	28.2	23.2958	23.297	23.297	23.297	23.297	273740	0.1	23.2956	145.732	1364	85
08/05 17:50:00	28.0667	23.2958	23.2969	23.297	23.297	23.297	273071	0.1	23.2956	145.73	1365	85
08/05 17:55:00	27.9333	23.2958	23.2969	23.297	23.297	23.297	272397	0.1	23.2956	145.729	1366	85
08/05 18:00:00	27.8	23.2958	23.2969	23.297	23.297	23.297	271721	0.1	23.2956	145.728	1367	85
08/05 18:05:00	27.6583	23.2958	23.2969	23.2969	23.297	23.297	270506	0	23.2956	0	1368	80.52
08/05 18:10:00	27.5167	23.2958	23.2969	23.2969	23.297	23.2969	270003	0	23.2956	0	1369	80.52
08/05 18:15:00	27.375	23.2958	23.2969	23.2969	23.297	23.2969	269386	0	23.2956	0	1370	80.52
08/05 18:20:00	27.2333	23.2957	23.2969	23.2969	23.297	23.2969	268772	0	23.2956	0	1371	80.52
08/05 18:25:00	27.0917	23.2957	23.2969	23.2969	23.2969	23.2969	268222	0	23.2956	0	1372	80.52
08/05 18:30:00	26.95	23.2957	23.2969	23.2969	23.2969	23.2969	267724	0	23.2956	0	1373	80.52
08/05 18:35:00	26.8083	23.2957	23.2969	23.2969	23.2969	23.2969	267255	0	23.2956	0	1374	80.52
08/05 18:40:00	26.6667	23.2957	23.2969	23.2969	23.2969	23.2969	266771	0	23.2956	0	1375	80.52
08/05 18:45:00	26.525	23.2957	23.2969	23.2969	23.2969	23.2969	266290	0	23.2956	0	1376	80.52
08/05 18:50:00	26.3833	23.2957	23.2969	23.2969	23.2969	23.2969	265799	0	23.2956	0	1377	80.52
08/05 18:55:00	26.2417	23.2957	23.2969	23.2969	23.2969	23.297	265628	0	23.2956	0	1378	80.52
08/05 19:00:00	26.1	23.2957	23.2969	23.2969	23.2969	23.2971	265325	0	23.2956	0	1379	80.52
08/05 19:05:00	25.9583	23.5631	23.8614	23.8975	23.9555	24.2488	1.7646	0	31.5306	0	1380	69.44
08/05 19:10:00	25.8167	23.9102	24.4734	24.5383	24.6329	25.1449	1.76551	0	31.5306	0	1381	69.44
08/05 19:15:00	25.675	24.0984	24.7488	24.8212	24.9133	25.4814	1.76414	0	31.5306	0	1382	69.44
08/05 19:20:00	25.5333	24.2592	24.9557	25.0292	25.1137	25.7103	1.76267	0	31.5306	0	1383	69.44
08/05 19:25:00	25.3917	24.3518	25.0576	25.1292	25.2093	25.8099	1.76146	0	31.5306	0	1384	69.44
08/05 19:30:00	25.25	24.4265	25.1293	25.1979	25.2723	25.8684	1.76051	0	31.5306	0	1385	69.44
08/05 19:35:00	25.1083	24.4906	25.1825	25.2472	25.314	25.9031	1.75981	0	31.5306	0	1386	69.44
08/05 19:40:00	24.9667	24.5467	25.2229	25.2834	25.3418	25.9234	1.75935	0	31.5306	0	1387	69.44
08/05 19:45:00	24.825	24.5942	25.2535	25.3106	25.3602	25.935	1.75911	0	31.5306	0	1388	69.44
08/05 19:50:00	24.6833	24.6341	25.2767	25.3308	25.3721	25.9409	1.75909	0	31.5306	0	1389	69.44
08/05 19:55:00	24.5417	24.6678	25.2944	25.3458	25.3793	25.943	1.75927	0	31.5306	0	1390	69.44
08/05 20:00:00	24.4	24.6965	25.3077	25.3566	25.3829	25.9426	1.75966	0	31.5306	0	1391	69.44
08/05 20:05:00	24.3583	24.721	25.3202	25.3669	25.3865	25.9432	3.08095	0	31.5306	0	1392	70.21
08/05 20:10:00	24.3167	24.7426	25.3317	25.3764	25.3899	25.9442	3.08362	0	31.5306	0	1393	70.21
08/05 20:15:00	24.275	24.7615	25.3421	25.3852	25.3931	25.9453	3.08713	0	31.5306	0	1394	70.21
08/05 20:20:00	24.2333	24.7783	25.3515	25.3931	25.3959	25.9464	3.0887	0	31.5306	0	1395	70.21
08/05 20:25:00	24.1917	24.7934	25.3599	25.4002	25.3983	25.9474	3.08609	0	31.5306	0	1396	70.21
08/05 20:30:00	24.15	24.8071	25.3674	25.4065	25.4003	25.9483	3.0823	0	31.5306	0	1397	70.21
08/05 20:35:00	24.1083	24.8196	25.3736	25.412	25.402	25.949	3.07981	0	31.5306	0	1398	70.21
08/05 20:40:00	24.0667	24.8313	25.3793	25.4169	25.4033	25.9495	3.07851	0	31.5306	0	1399	70.21
08/05 20:45:00	24.025	24.8422	25.3842	25.421	25.4043	25.9498	3.07833	0	31.5306	0	1400	70.21
08/05 20:50:00	23.9833	24.8524	25.3886	25.4246	25.4049	25.95	3.07918	0	31.5306	0	1401	70.21
08/05 20:55:00	23.9417	24.8621	25.3924	25.4276	25.4052	25.9499	3.08099	0	31.5306	0	1402	70.21
08/05 21:00:00	23.9	24.8713	25.3957	25.43	25.4053	25.9496	3.0837	0	31.5306	0	1403	70.21
08/05 21:05:00	23.9	24.88	25.3994	25.4329	25.406	25.9501	1.76363	0	31.5306	0	1404	66.2
08/05 21:10:00	23.9	24.888	25.4032	25.4359	25.4071	25.951	1.76495	0	31.5306	0	1405	66.2
08/05 21:15:00	23.9	24.8957	25.4071	25.439	25.4085	25.9521	1.76528	0	31.5306	0	1406	66.2
08/05 21:20:00	23.9	24.9032	25.4108	25.442	25.4099	25.9532	1.76411	0	31.5306	0	1407	66.2
08/05 21:25:00	23.9	24.9105	25.4144	25.4449	25.4114	25.9542	1.76265	0	31.5306	0	1408	66.2
08/05 21:30:00	23.9	24.9175	25.4179	25.4476	25.4129	25.9553	1.76147	0	31.5306	0	1409	66.2
08/05 21:35:00	23.9	24.9244	25.4211	25.4502	25.4143	25.9563	1.76055	0	31.5306	0	1410	66.2
08/05 21:40:00	23.9	24.9311	25.4242	25.4526	25.4157	25.9572	1.75987	0	31.5306	0	1411	66.2
08/05 21:45:00	23.9	24.9377	25.4271	25.4548	25.417	25.958	1.75943	0	31.5306	0	1412	66.2
08/05 21:50:00	23.9	24.9441	25.4298	25.4569	25.4183	25.9586	1.75922	0	31.5306	0	1413	66.2
08/05 21:55:00	23.9	24.9503	25.4324	25.4588	25.4194	25.9592	1.75922	0	31.5306	0	1414	66.2
08/05 22:00:00	23.9	24.9564	25.4347	25.4606	25.4205	25.9597	1.75942	0	31.5306	0	1415	66.2
08/05 22:05:00	23.7583	24.9625	25.433	25.458	25.4176	25.956	1.75983	0	31.5306	0	1416	53.76
08/05 22:10:00	23.6167	24.9683	25.4285	25.4526	25.4117	25.9498	1.76043	0	31.5306	0	1417	53.76
08/05 22:15:00	23.475	24.9741	25.4216	25.4447	25.4035	25.9416	1.76121	0	31.5306	0	1418	53.76
08/05 22:20:00	23.3333	24.9798	25.4132	25.4352	25.3939	25.9322	1.76217	0	31.5306	0	1419	53.76
08/05 22:25:00	23.1917	24.9854	25.4032	25.4242	25.3829	25.9218	1.7633	0	31.5306	0	1420	53.76
08/05 22:30:00	23.05	24.9909	25.3921	25.4124	25.3713	25.9108	1.76459	0	31.5306	0	1421	53.76
08/05 22:35:00	22.9083	24.9963	25.3802	25.3995	25.3588	25.899	1.76524	0	31.5306	0	1422	53.76
08/05 22:40:00	22.7667	25.0016	25.3674	25.386	25.346	25.8869	1.76438	0	31.5306	0	1423	53.76
08/05 22:45:00	22.625	25.0068	25.3541	25.372	25.3324	25.8743	1.76287	0	31.5306	0	1424	53.76
08/05 22:50:00	22.4833	25.0119	25.3401	25.3578	25.3185	25.8615	1.76164	0	31.5306	0	1425	53.76
08/05 22:55:00	22.3417	25.0169	25.3255	25.3431	25.3043	25.8481	1.76066	0	31.5306	0	1426	53.76
08/05 23:00:00	22.2	25.0218	25.3105	25.3282	25.2901	25.8346	1.75994	0	31.5306	0	1427	53.76
08/05 23:05:00	22.2	25.0267	25.2997	25.3177	25.2799	25.8251	1.75945	0	31.5306	0	1428	42.29
08/05 23:10:00	22.2	25.0315	25.2919	25.3099	25.2723	25.8179	1.75919	0	31.5306	0	1429	42.29
08/05 23:15:00	22.2	25.0362	25.2861	25.304	25.2664	25.8121	1.75915	0	31.5306	0	1430	42.29
08/05 23:20:00	22.2	25.0409	25.2817	25.2994	25.2618	25.8071	1.75932	0	31.5306	0	1431	42.29
08/05 23:25:00	22.2	25.0455	25.2782	25.2956	25.258	25.8028	1.75969	0	31.5306	0	1432	42.29
08/05 23:30:00	22.2	25.0501	25.2754	25.2924	25.2548	25.7989	1.76025	0	31.5306	0	1433	42.29
08/05 23:35:00	22.2	25.0546	25.2727	25.2896	25.2519	25.7953	1.76099	0	31.5306	0	1434	42.29
08/05 23:40:00	22.2	25.0591	25.2704	25.2871	25.2494	25.7918	1.76191	0	31.5306	0	1435	42.29
08/05 23:45:00	22.2	25.0636	25.2685	25.2849	25.2471	25.7885	1.76301	0	31.5306	0	1436	42.29
08/05 23:50:00	22.2	25.068	25.2669	25.2828	25.2449	25.7853	1.76427	0	31.5306	0	1437	42.29
08/05 23:55:00	22.2	25.0724	25.2654	25.2808	25.2429	25.7822	1.76525	0	31.5306	0	1438	42.29
08/05 24:00:00	22.2	25.0768	25.264	25.279	25.241	25.7792	1.76469	0	31.5306	0	1439	42.29
08/06 00:05:00	22.0167	25.0319	25.2105	25.225	25.187	25.7245	2.20305	0	26.7306	0	1440	38.94
08/06 00:10:00	21.8333	24.9974	25.1669	25.1813	25.1432	25.6821	2.20113	0	26.7306	0	1441	38.94
08/06 00:15:00	21.65	24.9711	25.1313	25.1458	25.1078	25.6475	2.1997	0	26.7306	0	1442	38.94
08/06 00:20:00	21.4667	24.9503	25.1013	25.1158	25.078	25.6176	2.19873	0	26.7306	0	1443	38.94
08/06 00:25:00	21.2833	24.9337	25.0749	25.0893	25.0516	25.5901	2.1982	0	26.7306	0	1444	38.94
08/06 00:30:00	21.1	24.9204	25.051	25.065	25.0276	25.5643	2.19809	0	26.7306	0	1445	38.94
08/06 00:35:00	20.9167	24.9096	25.0285	25.0421	25.0049	25.5397	2.19838	0	26.7306	0	1446	38.94
08/06 00:40:00	20.7333	24.901	25.007	25.0201	24.9831	25.5157	2.19904	0	26.7306	0	1447	38.94
08/06 00:45:00	20.55	24.8939	24.9861	24.9986	24.9618	25.4921	2.20006	0	26.7306	0	1448	38.94
08/06 00:50:00	20.3667	24.8882	24.9656	24.9774	24.941	25.4688	2.20141	0	26.7306	0	1449	38.94
08/06 00:55:00	20.1833	24.8835	24.9453	24.9565	24.9203	25.4457	2.2031	0	26.7306	0	1450	38.94
08/06 01:00:00	20	24.8796	24.9255	24.9357	24.8998	25.4226	2.20509	0	26.7306	0	1451	38.94
08/06 01:05:00	20	24.8764	24.9102	24.92	24.8842	25.4045	2.20568	0	30.7754	0	1452	34.25
08/06 01:10:00	20	24.8738	24.898	24.9073	24.8716	25.3896	2.20401	0	30.7754	0	1453	34.25
08/06 01:15:00	20	24.8717	24.8876	24.8964	24.8608	25.3766	2.20187	0	30.7754	0	1454	34.25
08/06 01:20:00	20	24.8699	24.8785	24.8867	24.8511	25.3649	2.20024	0	30.7754	0	1455	34.25
08/06 01:25:00	20	24.8685	24.8702	24.8778	24.8423	25.354	2.19909	0	30.7754	0	1456	34.25
08/06 01:30:00	20	24.8674	24.8624	24.8695	24.8341	25.3439	2.19839	0	30.7754	0	1457	34.25
08/06 01:35:00	20	24.8665	24.8551	24.8616	24.8262	25.3341	2.19811	0	30.7754	0	1458	34.25
08/06 01:40:00	20	24.8658	24.8481	24.8541	24.8188	25.3248	2.19823	0	30.7754	0	1459	34.25
08/06 01:45:00	20	24.8653	24.8414	24.8469	24.8116	25.3157	2.19874	0	30.7754	0	1460	34.25
08/06 01:50:00	20	24.8649	24.8349	24.8398	24.8046	25.3069	2.19962	0	30.7754	0	1461	34.25
08/06 01:55:00	20	24.8647	24.8287	24.833	24.7979	25.2983	2.20084	0	30.7754	0	1462	34.25
08/06 02:00:00	20	24.8647	24.8225	24.8264	24.7913	25.2899	2.20239	0	30.7754	0	1463	34.25
08/06 02:05:00	19.95	24.8647	24.8152	24.8185	24.7835	25.2802	2.20425	0	27.0716	0	1464	32.25
08/06 02:10:00	19.9	24.8648	24.8073	24.81	24.7751	25.2699	2.20581	0	27.0716	0	1465	32.25
08/06 02:15:00	19.85	24.865	24.799	24.8011	24.7664	25.2592	2.20504	0	27.0716	0	1466	32.25
08/06 02:20:00	19.8	24.8653	24.7906	24.7921	24.7574	25.2483	2.20269	0	27.0716	0	1467	32.25
08/06 02:25:00	19.75	24.8656	24.782	24.7829	24.7484	25.2372	2.20086	0	27.0716	0	1468	32.25
08/06 02:30:00	19.7	24.866	24.7733	24.7737	24.7393	25.2261	2.19951	0	27.0716	0	1469	32.25
08/06 02:35:00	19.65	24.8664	24.7646	24.7644	24.7301	25.215	2.19863	0	27.0716	0	1470	32.25
08/06 02:40:00	19.6	24.8668	24.7558	24.7551	24.721	25.2039	2.19818	0	27.0716	0	1471	32.25
08/06 02:45:00	19.55	24.8673	24.7471	24.7457	24.7118	25.1927	2.19814	0	27.0716	0	1472	32.25
08/06 02:50:00	19.5	24.8678	24.7383	24.7364	24.7026	25.1815	2.1985	0	27.0716	0	1473	32.25
08/06 02:55:00	19.45	24.8683	24.7295	24.727	24.6934	25.1704	2.19922	0	27.0716	0	1474	32.25
08/06 03:00:00	19.4	24.8689	24.7207	24.7177	24.6842	25.1592	2.2003	0	27.0716	0	1475	32.25
08/06 03:05:00	19.3083	23.6704	22.7724	22.4066	22.8399	22.5028	402608	0	20.6262	0	1476	30.36
08/06 03:10:00	19.2167	22.493	21.4165	20.9431	21.5255	20.9288	411017	0	20.6262	0	1477	30.36
08/06 03:15:00	19.125	22.0632	21.0844	20.6528	21.1916	20.6524	410567	0	20.6262	0	1478	30.36
08/06 03:20:00	19.0333	21.8138	20.8798	20.6324	20.9877	20.6323	400917	0	20.6262	0	1479	30.36
08/06 03:25:00	18.9417	21.6929	20.7621	20.6304	20.871	20.6301	391916	0	20.6262	0	1480	30.36
08/06 03:30:00	18.85	21.6026	20.6628	20.6291	20.7728	20.6288	383831	0	20.6262	0	1481	30.36
08/06 03:35:00	18.7583	21.5277	20.6331	20.6283	20.6829	20.628	374255	0	20.6262	0	1482	30.36
08/06 03:40:00	18.6667	21.4636	20.6286	20.6277	20.6351	20.6275	363501	0	20.6262	0	1483	30.36
08/06 03:45:00	18.575	21.4072	20.6276	20.6274	20.6285	20.6272	352971	0	20.6262	0	1484	30.36
08/06 03:50:00	18.4833	21.3571	20.6272	20.6271	20.6274	20.627	343695	0	20.6262	0	1485	30.36
08/06 03:55:00	18.3917	21.3112	20.627	20.6269	20.6271	20.6268	335372	0	20.6262	0	1486	30.36
08/06 04:00:00	18.3	21.2686	20.6269	20.6268	20.6269	20.6267	327816	0	20.6262	0	1487	30.36
08/06 04:05:00	18.2583	21.2414	20.3788	20.1231	20.4374	20.0772	378136	0	17.4167	0	1488	30.89
08/06 04:10:00	18.2167	21.1944	20.1895	19.8003	20.2822	19.7433	379813	0	17.4167	0	1489	30.89
08/06 04:15:00	18.175	21.1578	20.1158	19.7008	20.2152	19.6401	380454	0	17.4167	0	1490	30.89
08/06 04:20:00	18.1333	21.1218	20.0571	19.6296	20.1596	19.5661	380619	0	17.4167	0	1491	30.89
08/06 04:25:00	18.0917	21.0865	20.0043	19.5684	20.1087	19.502	380542	0	17.4167	0	1492	30.89
08/06 04:30:00	18.05	21.0522	19.9552	19.5132	20.0609	19.4439	380332	0	17.4167	0	1493	30.89
08/06 04:35:00	18.0083	21.0189	19.9086	19.4616	20.0154	19.3897	380044	0	17.4167	0	1494	30.89
08/06 04:40:00	17.9667	20.9866	19.8642	19.4131	19.9718	19.3387	379707	0	17.4167	0	1495	30.89
08/06 04:45:00	17.925	20.9552	19.8215	19.3668	19.9298	19.29	379336	0	17.4167	0	1496	30.89
08/06 04:50:00	17.8833	20.9247	19.7804	19.3226	19.8892	19.2435	378944	0	17.4167	0	1497	30.89
08/06 04:55:00	17.8417	20.8951	19.754	19.491	19.8927	19.2124	378537	0	17.4167	0	1498	30.89
08/06 05:00:00	17.8	20.8677	19.7293	19.6639	19.9084	19.1827	378118	0	17.4167	0	1499	30.89
08/06 05:05:00	17.8417	21.5638	20.8022	21.0854	20.9759	20.5107	3.08673	0	26.9055	0	1500	33.63
08/06 05:10:00	17.8833	22.3393	21.8313	22.3446	22.0113	21.7474	3.08247	0	26.9055	0	1501	33.63
08/06 05:15:00	17.925	22.7873	22.3406	22.9091	22.5343	22.3491	3.07954	0	26.9055	0	1502	33.63
08/06 05:20:00	17.9667	23.1091	22.6709	23.2943	22.8912	22.7383	3.0779	0	26.9055	0	1503	33.63
08/06 05:25:00	18.0083	23.2814	22.8414	23.5209	23.0894	22.9401	3.07733	0	26.9055	0	1504	33.63
08/06 05:30:00	18.05	23.4097	22.9689	23.7067	23.2417	23.0921	3.07782	0	26.9055	0	1505	33.63
08/06 05:35:00	18.0917	23.5088	23.0736	23.8791	23.3709	23.2169	3.07929	0	26.9055	0	1506	33.63
08/06 05:40:00	18.1333	23.5879	23.1623	24.0414	23.4827	23.3222	3.08168	0	26.9055	0	1507	33.63
08/06 05:45:00	18.175	23.6526	23.2399	24.1965	23.5742	23.4135	3.08493	0	26.9055	0	1508	33.63
08/06 05:50:00	18.2167	23.7068	23.31	24.3473	23.6493	23.4948	3.08792	0	26.9055	0	1509	33.63
08/06 05:55:00	18.2583	23.7531	23.3749	24.4957	23.7143	23.5693	3.08659	0	26.9055	0	1510	33.63
08/06 06:00:00	18.3	23.7935	23.4361	24.6427	23.773	23.6381	3.08237	0	26.9055	0	1511	33.63
08/06 06:05:00	18.4417	23.8293	23.4973	24.7914	23.8305	23.7053	8.35643	0	30.9815	0	1512	42.22
08/06 06:10:00	18.5833	23.863	23.5576	24.9414	23.8872	23.7705	8.35645	0	30.9815	0	1513	42.22
08/06 06:15:00	18.725	23.8937	23.6176	25.0921	23.9435	23.834	8.37451	0	30.9815	0	1514	42.22
08/06 06:20:00	18.8667	23.9219	23.6767	25.2431	23.9993	23.896	8.37282	0	30.9815	0	1515	42.22
08/06 06:25:00	19.0083	23.948	23.7354	25.3948	24.0551	23.9567	8.35499	0	30.9815	0	1516	42.22
08/06 06:30:00	19.15	23.972	23.7937	25.547	24.1105	24.0165	8.35654	0	30.9815	0	1517	42.22
08/06 06:35:00	19.2917	23.9944	23.8511	25.6912	24.1647	24.0747	8.37524	0	30.9815	0	1518	42.22
08/06 06:40:00	19.4333	24.0153	23.9075	25.828	24.2166	24.1314	8.37215	0	30.9815	0	1519	42.22
08/06 06:45:00	19.575	24.0348	23.9631	25.9597	24.2664	24.1871	8.35389	0	30.9815	0	1520	42.22
08/06 06:50:00	19.7167	24.0533	24.0182	26.087	24.3139	24.2419	8.35692	0	30.9815	0	1521	42.22
08/06 06:55:00	19.8583	24.0709	24.0728	26.2105	24.359	24.2961	8.37421	0	30.9815	0	1522	42.22
08/06 07:00:00	20	24.0877	24.1271	26.3306	24.4018	24.3497	8.37011	0	30.9815	0	1523	42.22
08/06 07:05:00	20.0917	24.4861	24.5839	26.8326	24.8498	24.8063	15.3887	1	29.571	11641.3	1524	50.96
08/06 07:10:00	20.1833	25.0446	25.159	27.4794	25.4108	25.375	15.4248	1	29.571	18111.4	1525	50.96
08/06 07:15:00	20.275	25.4157	25.5519	27.8897	25.785	25.759	15.391	1	29.571	23219.5	1526	50.96
08/06 07:20:00	20.3667	25.7234	25.8881	28.2357	26.0977	26.088	15.4107	1	29.571	27987.4	1527	50.96
08/06 07:25:00	20.4583	25.8935	26.0869	28.4511	26.2794	26.282	15.4055	1	29.571	30903.7	1528	50.96
08/06 07:30:00	20.55	26.025	26.2531	28.6385	26.4287	26.4414	15.4174	1	29.571	33337.5	1529	50.96
08/06 07:35:00	20.6417	26.132	26.398	28.7837	26.5554	26.5765	15.4108	1	29.571	35406.6	1530	50.96
08/06 07:40:00	20.7333	26.2229	26.5338	28.8923	26.6723	26.7007	15.4096	1	29.571	37239.2	1531	50.96
08/06 07:45:00	20.825	26.3028	26.6647	28.9747	26.7841	26.8192	15.4074	1	29.571	38915.8	1532	50.96
08/06 07:50:00	20.9167	26.3749	26.7914	29.0371	26.8918	26.933	15.4012	1	29.571	40478	1533	50.96
08/06 07:55:00	21.0083	26.441	26.9077	29.0733	26.9911	27.0381	15.4043	1	29.571	41907	1534	50.96
08/06 08:00:00	21.1	26.5026	27.0203	29.0986	27.0867	27.1392	15.3995	1	29.571	43265.8	1535	50.96
08/06 08:05:00	21.15	25.3191	24.8411	26.0614	24.986	24.4887	416864	1	23.8188	17437.5	1536	58.22
08/06 08:10:00	21.2	24.0272	23.8412	23.9655	23.8456	23.835	332930	1	23.8188	5032.98	1537	58.22
08/06 08:15:00	21.25	23.821	23.8225	23.8242	23.8226	23.8225	280007	1	23.8188	4015.43	1538	58.22
08/06 08:20:00	21.3	23.8207	23.822	23.8225	23.8221	23.822	271100	1	23.8188	4012.73	1539	58.22
08/06 08:25:00	21.35	23.8206	23.8217	23.8217	23.8217	23.8216	267917	1	23.8188	4011.58	1540	58.22
08/06 08:30:00	21.4	23.8206	23.8214	23.8211	23.8214	23.8213	266104	1	23.8188	4010.83	1541	58.22
08/06 08:35:00	21.45	23.8206	23.8212	23.8208	23.8212	23.8211	265188	1	23.8188	4010.3	1542	58.22
08/06 08:40:00	21.5	23.8206	23.821	23.8206	23.821	23.8209	265025	1	23.8188	4009.93	1543	58.22
08/06 08:45:00	21.55	23.8206	23.8209	23.8205	23.8209	23.8208	265405	1	23.8188	4009.68	1544	58.22
08/06 08:50:00	21.6	23.8206	23.8208	23.8204	23.8208	23.8207	266165	1	23.8188	4009.51	1545	58.22
08/06 08:55:00	21.65	23.8206	23.8207	23.8203	23.8207	23.8207	267218	1	23.8188	4009.38	1546	58.22
08/06 09:00:00	21.7	23.8206	23.8206	23.8203	23.8206	23.8206	268481	1	23.8188	4009.3	1547	58.22
08/06 09:05:00	21.65	23.7761	23.7779	23.778	23.7777	23.7778	273528	1	23.7717	3746.91	1548	67.75
08/06 09:10:00	21.6	23.7737	23.7739	23.7737	23.7739	23.7739	273310	1	23.7717	3729.99	1549	67.75
08/06 09:15:00	21.55	23.7735	23.7735	23.7732	23.7735	23.7735	273399	1	23.7717	3728.59	1550	67.75
08/06 09:20:00	21.5	23.7735	23.7734	23.7733	23.7734	23.7734	275219	1	23.7717	3728.49	1551	67.75
08/06 09:25:00	21.45	23.7735	23.7734	23.7733	23.7734	23.7734	276492	1	23.7717	3728.5	1552	67.75
08/06 09:30:00	21.4	23.7735	23.7734	23.7733	23.7734	23.7734	277181	1	23.7717	3728.46	1553	67.75
08/06 09:35:00	21.35	23.7735	23.7733	23.7733	23.7733	23.7733	277596	1	23.7717	3728.39	1554	67.75
08/06 09:40:00	21.3	23.7735	23.7733	23.7732	23.7733	23.7733	277779	1	23.7717	3728.32	1555	67.75
08/06 09:45:00	21.25	23.7735	23.7733	23.7732	23.7733	23.7733	277812	1	23.7717	3728.25	1556	67.75
08/06 09:50:00	21.2	23.7735	23.7732	23.7732	23.7733	23.7732	277727	1	23.7717	3728.18	1557	67.75
08/06 09:55:00	21.15	23.7735	23.7732	23.7732	23.7732	23.7732	277549	1	23.7717	3728.12	1558	67.75
08/06 10:00:00	21.1	23.7735	23.7732	23.7731	23.7732	23.7732	277290	1	23.7717	3728.06	1559	67.75
08/06 10:05:00	20.775	23.9366	23.93	23.9274	23.9304	23.9298	251493	0.8	23.942	3784.58	1560	83.12
08/06 10:10:00	20.45	23.943	23.9419	23.9414	23.9419	23.9418	248151	0.8	23.942	3827.61	1561	83.12
08/06 10:15:00	20.125	23.9433	23.9429	23.9428	23.9429	23.9429	244611	0.8	23.942	3830.62	1562	83.12
08/06 10:20:00	19.8	23.9433	23.943	23.943	23.943	23.943	240704	0.8	23.942	3830.92	1563	83.12
08/06 10:25:00	19.475	23.9434	23.943	23.943	23.943	23.943	236965	0.8	23.942	3831.02	1564	83.12
08/06 10:30:00	19.15	23.9434	23.943	23.943	23.9431	23.943	233344	0.8	23.942	3831.09	1565	83.12
08/06 10:35:00	18.825	23.9434	23.9431	23.943	23.9431	23.9431	230009	0.8	23.942	3831.17	1566	83.12
08/06 10:40:00	18.5	23.9434	23.9431	23.943	23.9431	23.9431	226846	0.8	23.942	3831.25	1567	83.12
08/06 10:45:00	18.175	23.9434	23.9431	23.9431	23.9431	23.9431	223790	0.8	23.942	3831.32	1568	83.12
08/06 10:50:00	17.85	23.9434	23.9431	23.9431	23.9431	23.9431	220755	0.8	23.942	3831.39	1569	83.12
08/06 10:55:00	17.525	23.9434	23.9431	23.9431	23.9431	23.9431	217884	0.8	23.942	3831.45	1570	83.12
08/06 11:00:00	17.2	23.9434	23.9431	23.9431	23.9431	23.9431	215179	0.8	23.942	3831.5	1571	83.12
08/06 11:05:00	17.1083	23.6708	23.6802	23.6834	23.6795	23.6806	217788	0.4	23.6557	1267.08	1572	92.94
08/06 11:10:00	17.0167	23.6575	23.6585	23.6591	23.6584	23.6586	209193	0.4	23.6557	1232.81	1573	92.94
08/06 11:15:00	16.925	23.6569	23.6567	23.6567	23.6567	23.6567	207050	0.4	23.6557	1230.62	1574	92.94
08/06 11:20:00	16.8333	23.6568	23.6565	23.6564	23.6565	23.6565	205900	0.4	23.6557	1230.39	1575	92.94
08/06 11:25:00	16.7417	23.6568	23.6564	23.6564	23.6564	23.6564	205051	0.4	23.6557	1230.31	1576	92.94
08/06 11:30:00	16.65	23.6567	23.6564	23.6564	23.6564	23.6564	204413	0.4	23.6557	1230.26	1577	92.94
08/06 11:35:00	16.5583	23.6567	23.6564	23.6563	23.6564	23.6564	204040	0.4	23.6557	1230.22	1578	92.94
08/06 11:40:00	16.4667	23.6567	23.6564	23.6563	23.6564	23.6564	203828	0.4	23.6557	1230.19	1579	92.94
08/06 11:45:00	16.375	23.6567	23.6564	23.6563	23.6564	23.6564	203710	0.4	23.6557	1230.17	1580	92.94
08/06 11:50:00	16.2833	23.6567	23.6564	23.6563	23.6564	23.6564	203667	0.4	23.6557	1230.16	1581	92.94
08/06 11:55:00	16.1917	23.6567	23.6564	23.6563	23.6564	23.6564	203679	0.4	23.6557	1230.15	1582	92.94
08/06 12:00:00	16.1	23.6567	23.6564	23.6563	23.6564	23.6564	203741	0.4	23.6557	1230.14	1583	92.94
08/06 12:05:00	16.1917	23.6503	23.6501	23.6501	23.65	23.6501	218697	0.8	23.6486	2433.3	1584	100.59
08/06 12:10:00	16.2833	23.6502	23.6498	23.6498	23.6498	23.6498	220748	0.8	23.6486	2432.62	1585	100.59
08/06 12:15:00	16.375	23.6502	23.6499	23.6499	23.6498	23.6499	222097	0.8	23.6486	2432.75	1586	100.59
08/06 12:20:00	16.4667	23.6502	23.6499	23.6499	23.6499	23.6499	223401	0.8	23.6486	2432.9	1587	100.59
08/06 12:25:00	16.5583	23.6503	23.6498	23.6499	23.6499	23.6499	222915	0.8	23.6486	2432.94	1588	100.59
08/06 12:30:00	16.65	23.6503	23.6498	23.6499	23.6499	23.6499	222922	0.8	23.6486	2432.92	1589	100.59
08/06 12:35:00	16.7417	23.6503	23.6498	23.6499	23.6499	23.6499	223258	0.8	23.6486	2432.94	1590	100.59
08/06 12:40:00	16.8333	23.6503	23.6498	23.6499	23.6499	23.6498	222218	0.8	23.6486	2432.92	1591	100.59
08/06 12:45:00	16.925	23.6503	23.6498	23.6498	23.6499	23.6497	221687	0.8	23.6486	2432.86	1592	100.59
08/06 12:50:00	17.0167	23.6503	23.6498	23.6498	23.6498	23.6497	221583	0.8	23.6486	2432.85	1593	100.59
08/06 12:55:00	17.1083	23.6503	23.6498	23.6498	23.6498	23.6497	221498	0.8	23.6486	2432.86	1594	100.59
08/06 13:00:00	17.2	23.6503	23.6498	23.6498	23.6498	23.6497	221382	0.8	23.6486	2432.87	1595	100.59
08/06 13:05:00	17.25	23.6505	23.6499	23.6499	23.6499	23.6499	232008	1	23.6486	3042.13	1596	108.05
08/06 13:10:00	17.3	23.6506	23.6501	23.6502	23.6502	23.6501	232011	1	23.6486	3042.98	1597	108.05
08/06 13:15:00	17.35	23.6506	23.6501	23.6502	23.6502	23.6501	231925	1	23.6486	3043.02	1598	108.05
08/06 13:20:00	17.4	23.6506	23.6502	23.6502	23.6502	23.6501	231630	1	23.6486	3043.02	1599	108.05
08/06 13:25:00	17.45	23.6506	23.6502	23.6502	23.6502	23.6501	231228	1	23.6486	3042.99	1600	108.05
08/06 13:30:00	17.5	23.6506	23.6502	23.6501	23.6502	23.6501	230767	1	23.6486	3042.96	1601	108.05
08/06 13:35:00	17.55	23.6506	23.6501	23.6501	23.6501	23.6501	229848	1	23.6486	3042.9	1602	108.05
08/06 13:40:00	17.6	23.6506	23.6501	23.6501	23.6501	23.6501	228734	1	23.6486	3042.81	1603	108.05
08/06 13:45:00	17.65	23.6506	23.6501	23.6501	23.6501	23.6501	227489	1	23.6486	3042.71	1604	108.05
08/06 13:50:00	17.7	23.6507	23.6503	23.6503	23.6503	23.6503	226321	1	23.6486	3043.57	1605	108.05
08/06 13:55:00	17.75	23.651	23.6507	23.6508	23.6508	23.6507	225452	1	23.6486	3045.37	1606	108.05
08/06 14:00:00	17.8	23.6513	23.651	23.6512	23.6511	23.6511	224545	1	23.6486	3046.96	1607	108.05
08/06 14:05:00	17.6583	23.6513	23.651	23.6511	23.6511	23.651	223241	1	23.6486	3046.96	1608	114.04
08/06 14:10:00	17.5167	23.6513	23.6511	23.651	23.651	23.651	223582	1	23.6486	3047	1609	114.04
08/06 14:15:00	17.375	23.6513	23.6512	23.6509	23.6509	23.6509	223259	1	23.6486	3046.93	1610	114.04
08/06 14:20:00	17.2333	23.6513	23.6511	23.6509	23.6509	23.6509	221871	1	23.6486	3046.82	1611	114.04
08/06 14:25:00	17.0917	23.6513	23.651	23.6508	23.6508	23.6511	222181	1	23.6486	3046.85	1612	114.04
08/06 14:30:00	16.95	23.6513	23.6509	23.6508	23.6508	23.6511	221566	1	23.6486	3046.78	1613	114.04
08/06 14:35:00	16.8083	23.6513	23.6509	23.6508	23.6508	23.6511	220845	1	23.6486	3046.74	1614	114.04
08/06 14:40:00	16.6667	23.6513	23.6509	23.6508	23.6508	23.651	220277	1	23.6486	3046.7	1615	114.04
08/06 14:45:00	16.525	23.6513	23.6509	23.6508	23.6508	23.651	219668	1	23.6486	3046.67	1616	114.04
08/06 14:50:00	16.3833	23.6513	23.6508	23.6508	23.6508	23.6509	219076	1	23.6486	3046.64	1617	114.04
08/06 14:55:00	16.2417	23.6513	23.6508	23.6507	23.6508	23.6509	218462	1	23.6486	3046.61	1618	114.04
08/06 15:00:00	16.1	23.6513	23.6508	23.6507	23.6508	23.6509	217834	1	23.6486	3046.58	1619	114.04
08/06 15:05:00	16.0583	23.6513	23.6508	23.6507	23.6507	23.6508	217172	1	23.6486	3046.37	1620	122.01
08/06 15:10:00	16.0167	23.6513	23.6507	23.6507	23.6507	23.6507	216847	1	23.6486	3046.2	1621	122.01
08/06 15:15:00	15.975	23.6513	23.6507	23.6506	23.6507	23.6507	216536	1	23.6486	3046.09	1622	122.01
08/06 15:20:00	15.9333	23.6512	23.6507	23.6506	23.6506	23.6506	216275	1	23.6486	3045.99	1623	122.01
08/06 15:25:00	15.8917	23.6512	23.6506	23.6506	23.6506	23.6506	216049	1	23.6486	3045.91	1624	122.01
08/06 15:30:00	15.85	23.6512	23.6506	23.6506	23.6506	23.6506	215843	1	23.6486	3045.83	1625	122.01
08/06 15:35:00	15.8083	23.6512	23.6506	23.6505	23.6506	23.6506	215291	1	23.6486	3045.75	1626	122.01
08/06 15:40:00	15.7667	23.6512	23.6506	23.6505	23.6506	23.6505	214585	1	23.6486	3045.68	1627	122.01
08/06 15:45:00	15.725	23.6512	23.6505	23.6505	23.6505	23.6505	213813	1	23.6486	3045.61	1628	122.01
08/06 15:50:00	15.6833	23.6512	23.6505	23.6505	23.6505	23.6505	212980	1	23.6486	3045.55	1629	122.01
08/06 15:55:00	15.6417	23.6512	23.6505	23.6505	23.6505	23.6505	212092	1	23.6486	3045.5	1630	122.01
08/06 16:00:00	15.6	23.6512	23.6505	23.6505	23.6505	23.6505	211163	1	23.6486	3045.45	1631	122.01
08/06 16:05:00	15.6417	23.6511	23.6503	23.6503	23.6504	23.6503	210442	1	23.6486	3044.84	1632	126.35
08/06 16:10:00	15.6833	23.651	23.6502	23.6502	23.6502	23.6502	209656	1	23.6486	3044.27	1633	126.35
08/06 16:15:00	15.725	23.6509	23.6501	23.6501	23.6501	23.6501	209098	1	23.6486	3043.75	1634	126.35
08/06 16:20:00	15.7667	23.6508	23.65	23.65	23.6501	23.65	208551	1	23.6486	3043.32	1635	126.35
08/06 16:25:00	15.8083	23.6507	23.65	23.65	23.65	23.6499	208026	1	23.6486	3042.95	1636	126.35
08/06 16:30:00	15.85	23.6506	23.6499	23.6499	23.6499	23.6499	207508	1	23.6486	3042.64	1637	126.35
08/06 16:35:00	15.8917	23.6506	23.6499	23.6499	23.6499	23.6499	207611	1	23.6486	3042.4	1638	126.35
08/06 16:40:00	15.9333	23.6505	23.6499	23.6499	23.6499	23.6499	208216	1	23.6486	3042.21	1639	126.35
08/06 16:45:00	15.975	23.6505	23.6499	23.6499	23.6499	23.65	208760	1	23.6486	3042.04	1640	126.35
08/06 16:50:00	16.0167	23.6505	23.6499	23.6498	23.6499	23.65	209333	1	23.6486	3041.9	1641	126.35
08/06 16:55:00	16.0583	23.6504	23.6499	23.6498	23.6499	23.6498	208193	1	23.6486	3041.72	1642	126.35
08/06 17:00:00	16.1	23.6504	23.6499	23.6498	23.6499	23.6498	207827	1	23.6486	3041.61	1643	126.35
08/06 17:05:00	16.15	23.65	23.6497	23.6497	23.6497	23.6497	182386	0.5	23.6486	1519.91	1644	117.9
08/06 17:10:00	16.2	23.65	23.6497	23.6497	23.6497	23.6497	177177	0.5	23.6486	1519.89	1645	117.9
08/06 17:15:00	16.25	23.6499	23.6497	23.6497	23.6497	23.6497	173582	0.5	23.6486	1519.84	1646	117.9
08/06 17:20:00	16.3	23.6499	23.6497	23.6497	23.6497	23.6497	171106	0.5	23.6486	1519.82	1647	117.9
08/06 17:25:00	16.35	23.6499	23.6497	23.6496	23.6497	23.6497	169355	0.5	23.6486	1519.8	1648	117.9
08/06 17:30:00	16.4	23.6499	23.6496	23.6496	23.6497	23.6497	168126	0.5	23.6486	1519.79	1649	117.9
08/06 17:35:00	16.45	23.6499	23.6496	23.6496	23.6497	23.6497	167133	0.5	23.6486	1519.78	1650	117.9
08/06 17:40:00	16.5	23.6499	23.6496	23.6496	23.6497	23.6497	166324	0.5	23.6486	1519.78	1651	117.9
08/06 17:45:00	16.55	23.6499	23.6496	23.6496	23.6497	23.6497	165680	0.5	23.6486	1519.78	1652	117.9
08/06 17:50:00	16.6	23.6499	23.6496	23.6496	23.6497	23.6497	165161	0.5	23.6486	1519.78	1653	117.9
08/06 17:55:00	16.65	23.6499	23.6496	23.6496	23.6497	23.6497	164735	0.5	23.6486	1519.78	1654	117.9
08/06 18:00:00	16.7	23.6499	23.6496	23.6496	23.6497	23.6496	164376	0.5	23.6486	1519.78	1655	117.9
08/06 18:05:00	16.6083	23.6491	23.649	23.649	23.649	23.649	145055	0	23.6486	0	1656	111
08/06 18:10:00	16.5167	23.6494	23.6492	23.6492	23.6492	23.6492	136771	0	23.6486	0	1657	111
08/06 18:15:00	16.425	23.6493	23.6491	23.6491	23.6491	23.6491	130959	0	23.6486	0	1658	111
08/06 18:20:00	16.3333	23.6493	23.649	23.649	23.649	23.649	126498	0	23.6486	0	1659	111
08/06 18:25:00	16.2417	23.6492	23.6489	23.6489	23.649	23.6489	122925	0	23.6486	0	1660	111
08/06 18:30:00	16.15	23.6492	23.6489	23.6489	23.6489	23.6489	120047	0	23.6486	0	1661	111
08/06 18:35:00	16.0583	23.6492	23.6489	23.6489	23.6489	23.6488	117598	0	23.6486	0	1662	111
08/06 18:40:00	15.9667	23.6491	23.6488	23.6488	23.6488	23.6488	115732	0	23.6486	0	1663	111
08/06 18:45:00	15.875	23.6491	23.6488	23.6488	23.6488	23.6488	114099	0	23.6486	0	1664	111
08/06 18:50:00	15.7833	23.6491	23.6488	23.6488	23.6488	23.6488	112489	0	23.6486	0	1665	111
08/06 18:55:00	15.6917	23.6491	23.6488	23.6488	23.6488	23.6488	110961	0	23.6486	0	1666	111
08/06 19:00:00	15.6	23.649	23.6487	23.6487	23.6488	23.6487	109490	0	23.6486	0	1667	111
08/06 19:05:00	15.4583	23.9596	23.9831	24.045	24.0547	24.263	7.48512	0	28.6085	0	1668	98.07
08/06 19:10:00	15.3167	24.3499	24.3126	24.4288	24.4322	24.7753	7.4927	0	28.6085	0	1669	98.07
08/06 19:15:00	15.175	24.5194	24.4093	24.541	24.533	24.8894	7.48263	0	28.6085	0	1670	98.07
08/06 19:20:00	15.0333	24.6363	24.4553	24.5949	24.5761	24.9282	7.47454	0	28.6085	0	1671	98.07
08/06 19:25:00	14.8917	24.7207	24.4749	24.619	24.5905	24.9324	7.48084	0	28.6085	0	1672	98.07
08/06 19:30:00	14.75	24.784	24.4802	24.6267	24.5897	24.9197	7.49419	0	28.6085	0	1673	98.07
08/06 19:35:00	14.6083	24.8332	24.4773	24.6252	24.5806	24.899	7.48933	0	28.6085	0	1674	98.07
08/06 19:40:00	14.4667	24.8727	24.4695	24.6183	24.567	24.8745	7.47532	0	28.6085	0	1675	98.07
08/06 19:45:00	14.325	24.9052	24.4587	24.608	24.5508	24.8478	7.47667	0	28.6085	0	1676	98.07
08/06 19:50:00	14.1833	24.933	24.4459	24.5955	24.533	24.8206	7.49092	0	28.6085	0	1677	98.07
08/06 19:55:00	14.0417	24.9576	24.4316	24.5816	24.5144	24.7937	7.49232	0	28.6085	0	1678	98.07
08/06 20:00:00	13.9	24.9802	24.4163	24.5666	24.4953	24.7671	7.47844	0	28.6085	0	1679	98.07
08/06 20:05:00	13.8083	24.9783	24.3839	24.534	24.4589	24.7245	3.5166	0	28.6085	0	1680	98.6
08/06 20:10:00	13.7167	24.9759	24.3603	24.5102	24.4315	24.6917	3.51735	0	28.6085	0	1681	98.6
08/06 20:15:00	13.625	24.9741	24.341	24.4906	24.4088	24.6641	3.51954	0	28.6085	0	1682	98.6
08/06 20:20:00	13.5333	24.9729	24.3232	24.473	24.3885	24.6392	3.52305	0	28.6085	0	1683	98.6
08/06 20:25:00	13.4417	24.972	24.3069	24.4564	24.3702	24.616	3.5278	0	28.6085	0	1684	98.6
08/06 20:30:00	13.35	24.9713	24.2911	24.4403	24.352	24.5937	3.52821	0	28.6085	0	1685	98.6
08/06 20:35:00	13.2583	24.9708	24.2756	24.4242	24.3341	24.5719	3.52351	0	28.6085	0	1686	98.6
08/06 20:40:00	13.1667	24.9704	24.2601	24.4083	24.3164	24.5507	3.51947	0	28.6085	0	1687	98.6
08/06 20:45:00	13.075	24.97	24.2446	24.3921	24.2987	24.53	3.51726	0	28.6085	0	1688	98.6
08/06 20:50:00	12.9833	24.9697	24.229	24.3757	24.2811	24.5095	3.51673	0	28.6085	0	1689	98.6
08/06 20:55:00	12.8917	24.9694	24.2133	24.3591	24.2634	24.4893	3.51772	0	28.6085	0	1690	98.6
08/06 21:00:00	12.8	24.969	24.1974	24.3424	24.2458	24.4693	3.52014	0	28.6085	0	1691	98.6
08/06 21:05:00	12.8	24.9686	24.1838	24.328	24.2307	24.452	2.20185	0	28.6085	0	1692	91.32
08/06 21:10:00	12.8	24.9679	24.1714	24.3147	24.2167	24.436	2.20363	0	28.6085	0	1693	91.32
08/06 21:15:00	12.8	24.9671	24.1595	24.302	24.2034	24.4208	2.20572	0	28.6085	0	1694	91.32
08/06 21:20:00	12.8	24.9663	24.148	24.2897	24.1905	24.4061	2.2056	0	28.6085	0	1695	91.32
08/06 21:25:00	12.8	24.9655	24.1367	24.2775	24.1779	24.3919	2.20326	0	28.6085	0	1696	91.32
08/06 21:30:00	12.8	24.9647	24.1256	24.2655	24.1656	24.378	2.20129	0	28.6085	0	1697	91.32
08/06 21:35:00	12.8	24.964	24.1146	24.2537	24.1535	24.3643	2.19981	0	28.6085	0	1698	91.32
08/06 21:40:00	12.8	24.9631	24.1037	24.2419	24.1415	24.3509	2.19879	0	28.6085	0	1699	91.32
08/06 21:45:00	12.8	24.9623	24.0929	24.2302	24.1297	24.3377	2.19822	0	28.6085	0	1700	91.32
08/06 21:50:00	12.8	24.9614	24.0823	24.2186	24.118	24.3247	2.19807	0	28.6085	0	1701	91.32
08/06 21:55:00	12.8	24.9605	24.0717	24.2071	24.1064	24.3119	2.19831	0	28.6085	0	1702	91.32
08/06 22:00:00	12.8	24.9596	24.0613	24.1956	24.095	24.2992	2.19893	0	28.6085	0	1703	91.32
08/06 22:05:00	12.75	24.9587	24.0493	24.1826	24.082	24.285	2.19991	0	28.6085	0	1704	72.31
08/06 22:10:00	12.7	24.9577	24.0366	24.1689	24.0684	24.2702	2.20123	0	28.6085	0	1705	72.31
08/06 22:15:00	12.65	24.9567	24.0235	24.1548	24.0545	24.2551	2.20288	0	28.6085	0	1706	72.31
08/06 22:20:00	12.6	24.9556	24.0102	24.1405	24.0404	24.2398	2.20484	0	28.6085	0	1707	72.31
08/06 22:25:00	12.55	24.9545	23.9968	24.1261	24.0262	24.2245	2.2057	0	28.6085	0	1708	72.31
08/06 22:30:00	12.5	24.9534	23.9833	24.1115	24.0119	24.2091	2.20427	0	28.6085	0	1709	72.31
08/06 22:35:00	12.45	24.9522	23.9697	24.0969	23.9975	24.1936	2.20207	0	28.6085	0	1710	72.31
08/06 22:40:00	12.4	24.951	23.956	24.0823	23.9831	24.1782	2.20039	0	28.6085	0	1711	72.31
08/06 22:45:00	12.35	24.9498	23.9423	24.0675	23.9687	24.1627	2.19919	0	28.6085	0	1712	72.31
08/06 22:50:00	12.3	24.9485	23.9286	24.0528	23.9543	24.1472	2.19844	0	28.6085	0	1713	72.31
08/06 22:55:00	12.25	24.9472	23.9148	24.038	23.9399	24.1318	2.19811	0	28.6085	0	1714	72.31
08/06 23:00:00	12.2	24.9459	23.901	24.0232	23.9255	24.1163	2.19819	0	28.6085	0	1715	72.31
08/06 23:05:00	12.2	24.9445	23.8884	24.0096	23.9123	24.1021	2.19866	0	28.6085	0	1716	57.43
08/06 23:10:00	12.2	24.9431	23.8763	23.9966	23.8996	24.0884	2.19949	0	28.6085	0	1717	57.43
08/06 23:15:00	12.2	24.9417	23.8646	23.9839	23.8873	24.0751	2.20068	0	28.6085	0	1718	57.43
08/06 23:20:00	12.2	24.9402	23.853	23.9713	23.8751	24.062	2.20219	0	28.6085	0	1719	57.43
08/06 23:25:00	12.2	24.9388	23.8416	23.959	23.8632	24.0491	2.20403	0	28.6085	0	1720	57.43
08/06 23:30:00	12.2	24.9373	23.8303	23.9467	23.8514	24.0363	2.20585	0	28.6085	0	1721	57.43
08/06 23:35:00	12.2	24.9358	23.8191	23.9345	23.8396	24.0235	2.20532	0	28.6085	0	1722	57.43
08/06 23:40:00	12.2	24.9343	23.808	23.9224	23.828	24.0109	2.20291	0	28.6085	0	1723	57.43
08/06 23:45:00	12.2	24.9328	23.7969	23.9103	23.8164	23.9984	2.20103	0	28.6085	0	1724	57.43
08/06 23:50:00	12.2	24.9312	23.7859	23.8983	23.8049	23.9859	2.19963	0	28.6085	0	1725	57.43
08/06 23:55:00	12.2	24.9297	23.7749	23.8864	23.7934	23.9734	2.19869	0	28.6085	0	1726	57.43
08/06 24:00:00	12.2	24.9281	23.764	23.8745	23.782	23.9611	2.1982	0	28.6085	0	1727	57.43
08/07 00:05:00	12.1583	24.9266	23.7525	23.8622	23.7703	23.9483	2.19753	0	29.1961	0	1728	53.1
08/07 00:10:00	12.1167	24.925	23.741	23.8498	23.7583	23.9354	2.19784	0	29.1961	0	1729	53.1
08/07 00:15:00	12.075	24.9234	23.7294	23.8372	23.7463	23.9224	2.19852	0	29.1961	0	1730	53.1
08/07 00:20:00	12.0333	24.9218	23.7177	23.8246	23.7342	23.9093	2.19956	0	29.1961	0	1731	53.1
08/07 00:25:00	11.9917	24.9202	23.706	23.812	23.7221	23.8962	2.20094	0	29.1961	0	1732	53.1
08/07 00:30:00	11.95	24.9186	23.6944	23.7994	23.7101	23.8832	2.20265	0	29.1961	0	1733	53.1
08/07 00:35:00	11.9083	24.9169	23.6827	23.7868	23.698	23.8701	2.20466	0	29.1961	0	1734	53.1
08/07 00:40:00	11.8667	24.9153	23.671	23.7742	23.686	23.8571	2.20509	0	29.1961	0	1735	53.1
08/07 00:45:00	11.825	24.9137	23.6594	23.7616	23.6739	23.8441	2.20327	0	29.1961	0	1736	53.1
08/07 00:50:00	11.7833	24.912	23.6478	23.7491	23.6619	23.8311	2.20117	0	29.1961	0	1737	53.1
08/07 00:55:00	11.7417	24.9103	23.6362	23.7366	23.65	23.8181	2.19957	0	29.1961	0	1738	53.1
08/07 01:00:00	11.7	24.9086	23.6246	23.7241	23.638	23.8051	2.19845	0	29.1961	0	1739	53.1
08/07 01:05:00	11.7917	24.9069	23.6165	23.7152	23.6296	23.7958	2.19777	0	30.9248	0	1740	39.69
08/07 01:10:00	11.8833	24.9052	23.6103	23.7082	23.623	23.7883	2.19752	0	30.9248	0	1741	39.69
08/07 01:15:00	11.975	24.9035	23.6051	23.7022	23.6175	23.782	2.19767	0	30.9248	0	1742	39.69
08/07 01:20:00	12.0667	24.9018	23.6006	23.697	23.6127	23.7763	2.19821	0	30.9248	0	1743	39.69
08/07 01:25:00	12.1583	24.9	23.5967	23.6923	23.6084	23.7712	2.1991	0	30.9248	0	1744	39.69
08/07 01:30:00	12.25	24.8983	23.5931	23.688	23.6045	23.7664	2.20034	0	30.9248	0	1745	39.69
08/07 01:35:00	12.3417	24.8966	23.5898	23.684	23.601	23.762	2.20191	0	30.9248	0	1746	39.69
08/07 01:40:00	12.4333	24.8949	23.5869	23.6803	23.5977	23.7579	2.2038	0	30.9248	0	1747	39.69
08/07 01:45:00	12.525	24.8932	23.5841	23.6768	23.5947	23.7541	2.20521	0	30.9248	0	1748	39.69
08/07 01:50:00	12.6167	24.8916	23.5816	23.6736	23.5919	23.7505	2.20431	0	30.9248	0	1749	39.69
08/07 01:55:00	12.7083	24.89	23.5794	23.6707	23.5894	23.7471	2.20199	0	30.9248	0	1750	39.69
08/07 02:00:00	12.8	24.8883	23.5774	23.668	23.587	23.744	2.20019	0	30.9248	0	1751	39.69
08/07 02:05:00	12.8	24.8867	23.5727	23.6626	23.5821	23.7382	2.19887	0	30.6854	0	1752	35.29
08/07 02:10:00	12.8	24.8852	23.5668	23.6559	23.5759	23.7311	2.19801	0	30.6854	0	1753	35.29
08/07 02:15:00	12.8	24.8836	23.5602	23.6485	23.5691	23.7234	2.19759	0	30.6854	0	1754	35.29
08/07 02:20:00	12.8	24.882	23.5532	23.6407	23.5618	23.7152	2.19757	0	30.6854	0	1755	35.29
08/07 02:25:00	12.8	24.8804	23.5459	23.6327	23.5543	23.7068	2.19795	0	30.6854	0	1756	35.29
08/07 02:30:00	12.8	24.8789	23.5385	23.6246	23.5466	23.6983	2.19869	0	30.6854	0	1757	35.29
08/07 02:35:00	12.8	24.8773	23.531	23.6163	23.5389	23.6897	2.19979	0	30.6854	0	1758	35.29
08/07 02:40:00	12.8	24.8757	23.5235	23.608	23.5311	23.681	2.20123	0	30.6854	0	1759	35.29
08/07 02:45:00	12.8	24.8741	23.5159	23.5996	23.5232	23.6723	2.20298	0	30.6854	0	1760	35.29
08/07 02:50:00	12.8	24.8725	23.5082	23.5912	23.5153	23.6635	2.20505	0	30.6854	0	1761	35.29
08/07 02:55:00	12.8	24.8709	23.5005	23.5828	23.5074	23.6547	2.20508	0	30.6854	0	1762	35.29
08/07 03:00:00	12.8	24.8693	23.4928	23.5743	23.4995	23.646	2.20288	0	30.6854	0	1763	35.29
08/07 03:05:00	12.7083	23.6849	21.8169	21.5694	21.9052	21.4178	235029	0	20.0135	0	1764	32.59
08/07 03:10:00	12.6167	22.5156	20.6171	20.2551	20.7405	20.0698	230383	0	20.0135	0	1765	32.59
08/07 03:15:00	12.525	22.0799	20.2893	20.0292	20.4135	20.0184	221341	0	20.0135	0	1766	32.59
08/07 03:20:00	12.4333	21.8276	20.0939	20.015	20.2191	20.0148	216007	0	20.0135	0	1767	32.59
08/07 03:25:00	12.3417	21.7037	20.0253	20.015	20.1067	20.015	210581	0	20.0135	0	1768	32.59
08/07 03:30:00	12.25	21.6104	20.0164	20.0151	20.0268	20.0151	204159	0	20.0135	0	1769	32.59
08/07 03:35:00	12.1583	21.5345	20.0153	20.0152	20.0166	20.0152	196731	0	20.0135	0	1770	32.59
08/07 03:40:00	12.0667	21.4712	20.0152	20.0152	20.0154	20.0152	190240	0	20.0135	0	1771	32.59
08/07 03:45:00	11.975	21.4153	20.0152	20.0152	20.0153	20.0153	184043	0	20.0135	0	1772	32.59
08/07 03:50:00	11.8833	21.365	20.0152	20.0153	20.0153	20.0153	178086	0	20.0135	0	1773	32.59
08/07 03:55:00	11.7917	21.319	20.0153	20.0153	20.0153	20.0153	172793	0	20.0135	0	1774	32.59
08/07 04:00:00	11.7	21.2762	20.0152	20.0152	20.0152	20.0153	168269	0	20.0135	0	1775	32.59
08/07 04:05:00	11.7	21.2509	19.7302	19.5384	19.7898	19.4148	230910	0	17.4764	0	1776	32.51
08/07 04:10:00	11.7	21.2002	19.4766	19.164	19.5793	18.9719	230808	0	17.4764	0	1777	32.51
08/07 04:15:00	11.7	21.1624	19.3973	19.0649	19.5074	18.8622	230751	0	17.4764	0	1778	32.51
08/07 04:20:00	11.7	21.1249	19.3374	18.9951	19.4509	18.7874	230703	0	17.4764	0	1779	32.51
08/07 04:25:00	11.7	21.0881	19.285	18.9358	19.4007	18.7243	230660	0	17.4764	0	1780	32.51
08/07 04:30:00	11.7	21.0521	19.237	18.8825	19.3541	18.6682	230623	0	17.4764	0	1781	32.51
08/07 04:35:00	11.7	21.0172	19.1919	18.833	19.3102	18.6163	230591	0	17.4764	0	1782	32.51
08/07 04:40:00	11.7	20.9833	19.1491	18.7865	19.2683	18.5679	230562	0	17.4764	0	1783	32.51
08/07 04:45:00	11.7	20.9503	19.1081	18.7423	19.2281	18.5219	230536	0	17.4764	0	1784	32.51
08/07 04:50:00	11.7	20.9182	19.0687	18.7002	19.1894	18.4782	230513	0	17.4764	0	1785	32.51
08/07 04:55:00	11.7	20.8868	19.0308	18.6596	19.152	18.4363	230493	0	17.4764	0	1786	32.51
08/07 05:00:00	11.7	20.8565	19.0092	18.8815	19.1659	18.4115	230474	0	17.4764	0	1787	32.51
08/07 05:05:00	11.7917	21.544	19.9673	20.1995	20.133	19.577	3.07624	0	29.9717	0	1788	36.65
08/07 05:10:00	11.8833	22.3129	20.8873	21.3799	21.0666	20.6698	3.07649	0	29.9717	0	1789	36.65
08/07 05:15:00	11.975	22.7594	21.3359	21.9117	21.5326	21.1946	3.07775	0	29.9717	0	1790	36.65
08/07 05:20:00	12.0667	23.0793	21.6246	22.2778	21.8555	21.5302	3.07999	0	29.9717	0	1791	36.65
08/07 05:25:00	12.1583	23.2495	21.7731	22.4999	22.0406	21.7038	3.08303	0	29.9717	0	1792	36.65
08/07 05:30:00	12.25	23.3754	21.8847	22.685	22.1846	21.835	3.08689	0	29.9717	0	1793	36.65
08/07 05:35:00	12.3417	23.472	21.9755	22.8535	22.3019	21.9422	3.08663	0	29.9717	0	1794	36.65
08/07 05:40:00	12.4333	23.5483	22.0537	23.0137	22.4037	22.0343	3.08235	0	29.9717	0	1795	36.65
08/07 05:45:00	12.525	23.6102	22.1241	23.1694	22.4873	22.1166	3.07913	0	29.9717	0	1796	36.65
08/07 05:50:00	12.6167	23.6615	22.1893	23.3226	22.5564	22.1918	3.07717	0	29.9717	0	1797	36.65
08/07 05:55:00	12.7083	23.7048	22.2509	23.4745	22.6172	22.2617	3.07636	0	29.9717	0	1798	36.65
08/07 06:00:00	12.8	23.7421	22.3099	23.6256	22.6733	22.3275	3.07663	0	29.9717	0	1799	36.65
08/07 06:05:00	13.0333	23.7746	22.3714	23.78	22.7315	22.3944	8.36095	0	30.2153	0	1800	48.19
08/07 06:10:00	13.2667	23.8049	22.4339	23.9363	22.7909	22.4612	8.37113	0	30.2153	0	1801	48.19
08/07 06:15:00	13.5	23.832	22.4969	24.094	22.8513	22.5275	8.36189	0	30.2153	0	1802	48.19
08/07 06:20:00	13.7333	23.8565	22.5602	24.2525	22.9124	22.5932	8.3522	0	30.2153	0	1803	48.19
08/07 06:25:00	13.9667	23.8789	22.6237	24.4121	22.9742	22.6584	8.36224	0	30.2153	0	1804	48.19
08/07 06:30:00	14.2	23.8998	22.6874	24.5727	23.0365	22.7233	8.37092	0	30.2153	0	1805	48.19
08/07 06:35:00	14.4333	23.9194	22.751	24.7203	23.0984	22.7875	8.36059	0	30.2153	0	1806	48.19
08/07 06:40:00	14.6667	23.9379	22.8142	24.8564	23.1586	22.8511	8.35237	0	30.2153	0	1807	48.19
08/07 06:45:00	14.9	23.9553	22.8773	24.9842	23.217	22.9141	8.36362	0	30.2153	0	1808	48.19
08/07 06:50:00	15.1333	23.9717	22.9403	25.1056	23.2732	22.9769	8.37078	0	30.2153	0	1809	48.19
08/07 06:55:00	15.3667	23.9872	23.0032	25.2219	23.3271	23.0394	8.35936	0	30.2153	0	1810	48.19
08/07 07:00:00	15.6	24.0019	23.0661	25.334	23.3786	23.1019	8.3526	0	30.2153	0	1811	48.19
08/07 07:05:00	15.7333	24.398	23.5637	25.8692	23.8668	23.5999	15.4189	1	30.0546	8063.73	1812	61.94
08/07 07:10:00	15.8667	24.9526	24.157	26.5474	24.4426	24.1919	15.3936	1	30.0546	13568.5	1813	61.94
08/07 07:15:00	16	25.3219	24.5666	26.9965	24.8341	24.6019	15.4108	1	30.0546	18091.2	1814	61.94
08/07 07:20:00	16.1333	25.6288	24.9384	27.3712	25.1825	24.9717	15.4087	1	30.0546	22444.3	1815	61.94
08/07 07:25:00	16.2667	25.7986	25.1571	27.5935	25.3829	25.1858	15.4055	1	30.0546	25113.3	1816	61.94
08/07 07:30:00	16.4	25.9296	25.338	27.7801	25.5451	25.3588	15.4035	1	30.0546	27331.9	1817	61.94
08/07 07:35:00	16.5333	26.036	25.4954	27.9445	25.6834	25.5059	15.3973	1	30.0546	29252	1818	61.94
08/07 07:40:00	16.6667	26.1261	25.6375	28.0939	25.8063	25.6364	15.4005	1	30.0546	30971.3	1819	61.94
08/07 07:45:00	16.8	26.2052	25.7692	28.2325	25.9191	25.7559	15.3957	1	30.0546	32556.7	1820	61.94
08/07 07:50:00	16.9333	26.2763	25.893	28.3626	26.0245	25.8676	15.4024	1	30.0546	34045.3	1821	61.94
08/07 07:55:00	17.0667	26.3417	26.0106	28.4856	26.1246	25.9734	15.3976	1	30.0546	35462.9	1822	61.94
08/07 08:00:00	17.2	26.4024	26.1228	28.6026	26.2202	26.0747	15.4067	1	30.0546	36825.2	1823	61.94
08/07 08:05:00	17.3833	25.2366	24.3792	25.736	24.4692	24.1976	214717	1	23.9981	15337.3	1824	72.94
08/07 08:10:00	17.5667	24.0754	24.0037	24.0565	24.0052	24.0015	152690	1	23.9981	5571.61	1825	72.94
08/07 08:15:00	17.75	24.0004	24.0002	24.0022	24.0004	24.0002	169830	1	23.9981	5176.17	1826	72.94
08/07 08:20:00	17.9333	24.0005	24.0002	24.0018	24.0004	24.0003	171459	1	23.9981	5176.26	1827	72.94
08/07 08:25:00	18.1167	24.0005	24.0003	24.0013	24.0004	24.0003	173392	1	23.9981	5176.13	1828	72.94
08/07 08:30:00	18.3	24.0005	24.0003	24.0009	24.0004	24.0004	176394	1	23.9981	5176.11	1829	72.94
08/07 08:35:00	18.4833	24.0005	24.0003	24.0007	24.0004	24.0004	178921	1	23.9981	5176.17	1830	72.94
08/07 08:40:00	18.6667	24.0006	24.0003	24.0005	24.0004	24.0004	181030	1	23.9981	5176.27	1831	72.94
08/07 08:45:00	18.85	24.0006	24.0004	24.0004	24.0004	24.0004	182898	1	23.9981	5176.42	1832	72.94
08/07 08:50:00	19.0333	24.0006	24.0004	24.0004	24.0004	24.0004	184598	1	23.9981	5176.61	1833	72.94
08/07 08:55:00	19.2167	24.0007	24.0005	24.0003	24.0005	24.0005	186163	1	23.9981	5176.82	1834	72.94
08/07 09:00:00	19.4	24.0007	24.0005	24.0003	24.0005	24.0005	187643	1	23.9981	5177.05	1835	72.94
08/07 09:05:00	19.45	23.5881	23.5527	23.5606	23.553	23.5528	236337	1	23.5374	2670.76	1836	83.45
08/07 09:10:00	19.5	23.5404	23.5399	23.5395	23.5398	23.5399	210728	1	23.5374	2487.55	1837	83.45
08/07 09:15:00	19.55	23.5401	23.5396	23.5389	23.5396	23.5396	209918	1	23.5374	2486.01	1838	83.45
08/07 09:20:00	19.6	23.5399	23.5394	23.5387	23.5393	23.5394	210343	1	23.5374	2485.1	1839	83.45
08/07 09:25:00	19.65	23.5397	23.5392	23.5385	23.5392	23.5392	210797	1	23.5374	2484.34	1840	83.45
08/07 09:30:00	19.7	23.5396	23.5391	23.5384	23.539	23.539	211358	1	23.5374	2483.7	1841	83.45
08/07 09:35:00	19.75	23.5395	23.539	23.5384	23.5389	23.5389	211957	1	23.5374	2483.16	1842	83.45
08/07 09:40:00	19.8	23.5394	23.5389	23.5383	23.5388	23.5388	212601	1	23.5374	2482.7	1843	83.45
08/07 09:45:00	19.85	23.5393	23.5388	23.5383	23.5387	23.5387	213279	1	23.5374	2482.31	1844	83.45
08/07 09:50:00	19.9	23.5392	23.5387	23.5383	23.5386	23.5386	213983	1	23.5374	2481.97	1845	83.45
08/07 09:55:00	19.95	23.5392	23.5386	23.5382	23.5386	23.5386	214707	1	23.5374	2481.67	1846	83.45
08/07 10:00:00	20	23.5391	23.5386	23.5382	23.5385	23.5385	215448	1	23.5374	2481.42	1847	83.45
08/07 10:05:00	20.05	24.0902	24.344	24.5111	24.3392	24.2854	173146	0.8	24.6294	5184.29	1848	101.96
08/07 10:10:00	20.1	24.624	24.6231	24.6252	24.6232	24.6223	171091	0.8	24.6294	8295.98	1849	101.96
08/07 10:15:00	20.15	24.6303	24.6301	24.63	24.6301	24.6301	171132	0.8	24.6294	8346.04	1850	101.96
08/07 10:20:00	20.2	24.6304	24.6302	24.6301	24.6302	24.6302	174032	0.8	24.6294	8346.64	1851	101.96
08/07 10:25:00	20.25	24.6304	24.6303	24.6302	24.6302	24.6302	177130	0.8	24.6294	8347.03	1852	101.96
08/07 10:30:00	20.3	24.6305	24.6303	24.6302	24.6303	24.6303	180071	0.8	24.6294	8347.38	1853	101.96
08/07 10:35:00	20.35	24.6305	24.6303	24.6302	24.6303	24.6303	180772	0.8	24.6294	8347.69	1854	101.96
08/07 10:40:00	20.4	24.6305	24.6304	24.6302	24.6303	24.6303	181430	0.8	24.6294	8347.97	1855	101.96
08/07 10:45:00	20.45	24.6306	24.6304	24.6303	24.6304	24.6304	182042	0.8	24.6294	8348.23	1856	101.96
08/07 10:50:00	20.5	24.6306	24.6304	24.6303	24.6304	24.6304	182629	0.8	24.6294	8348.46	1857	101.96
08/07 10:55:00	20.55	24.6306	24.6304	24.6303	24.6304	24.6304	183210	0.8	24.6294	8348.68	1858	101.96
08/07 11:00:00	20.6	24.6307	24.6304	24.6303	24.6304	24.6304	183758	0.8	24.6294	8348.87	1859	101.96
08/07 11:05:00	20.6	23.8214	23.5	23.4181	23.575	23.3056	301094	0.4	23.1221	1382.49	1860	115.95
08/07 11:10:00	20.6	23.1443	23.1424	23.1404	23.1467	23.133	241962	0.4	23.1221	380.768	1861	115.95
08/07 11:15:00	20.6	23.1241	23.1236	23.1234	23.1237	23.1235	222929	0.4	23.1221	358.03	1862	115.95
08/07 11:20:00	20.6	23.124	23.1234	23.1232	23.1234	23.1234	219744	0.4	23.1221	357.838	1863	115.95
08/07 11:25:00	20.6	23.1239	23.1232	23.1231	23.1233	23.1233	217217	0.4	23.1221	357.728	1864	115.95
08/07 11:30:00	20.6	23.1238	23.1232	23.123	23.1232	23.1232	215132	0.4	23.1221	357.647	1865	115.95
08/07 11:35:00	20.6	23.1238	23.1231	23.123	23.1232	23.1232	213132	0.4	23.1221	357.582	1866	115.95
08/07 11:40:00	20.6	23.1237	23.1231	23.123	23.1231	23.1231	211327	0.4	23.1221	357.531	1867	115.95
08/07 11:45:00	20.6	23.1237	23.1231	23.123	23.1231	23.1231	209736	0.4	23.1221	357.49	1868	115.95
08/07 11:50:00	20.6	23.1237	23.123	23.123	23.1231	23.1231	209318	0.4	23.1221	357.464	1869	115.95
08/07 11:55:00	20.6	23.1236	23.123	23.1231	23.123	23.123	208622	0.4	23.1221	357.439	1870	115.95
08/07 12:00:00	20.6	23.1236	23.123	23.1231	23.123	23.123	207689	0.4	23.1221	357.416	1871	115.95
08/07 12:05:00	20.6917	23.7321	23.8409	23.8887	23.8688	23.8601	180320	0.8	23.9	2982.12	1872	124.2
08/07 12:10:00	20.7833	23.9012	23.9006	23.9006	23.9006	23.9006	191879	0.8	23.9	3609.86	1873	124.2
08/07 12:15:00	20.875	23.9012	23.9006	23.9006	23.9006	23.9006	194238	0.8	23.9	3610.27	1874	124.2
08/07 12:20:00	20.9667	23.9013	23.9006	23.9006	23.9006	23.9006	195434	0.8	23.9	3610.32	1875	124.2
08/07 12:25:00	21.0583	23.9013	23.9006	23.9006	23.9006	23.9006	196516	0.8	23.9	3610.33	1876	124.2
08/07 12:30:00	21.15	23.9013	23.9006	23.9006	23.9006	23.9006	197488	0.8	23.9	3610.32	1877	124.2
08/07 12:35:00	21.2417	23.9013	23.9006	23.9006	23.9006	23.9006	198184	0.8	23.9	3610.3	1878	124.2
08/07 12:40:00	21.3333	23.9013	23.9006	23.9006	23.9006	23.9006	199069	0.8	23.9	3610.28	1879	124.2
08/07 12:45:00	21.425	23.9013	23.9006	23.9006	23.9006	23.9006	200185	0.8	23.9	3610.27	1880	124.2
08/07 12:50:00	21.5167	23.9012	23.9007	23.9006	23.9006	23.9006	201358	0.8	23.9	3610.25	1881	124.2
08/07 12:55:00	21.6083	23.9012	23.9007	23.9006	23.9006	23.9006	202571	0.8	23.9	3610.23	1882	124.2
08/07 13:00:00	21.7	23.9012	23.9007	23.9006	23.9006	23.9006	203821	0.8	23.9	3610.21	1883	124.2
08/07 13:05:00	21.6083	23.9014	23.9007	23.9006	23.9006	23.9006	212513	1	23.9	4513.33	1884	135.45
08/07 13:10:00	21.5167	23.9013	23.9006	23.9006	23.9006	23.9006	214034	1	23.9	4513.23	1885	135.45
08/07 13:15:00	21.425	23.9013	23.9006	23.9006	23.9006	23.9006	215390	1	23.9	4513.1	1886	135.45
08/07 13:20:00	21.3333	23.9013	23.9006	23.9006	23.9006	23.9006	216685	1	23.9	4512.98	1887	135.45
08/07 13:25:00	21.2417	23.9013	23.9006	23.9006	23.9006	23.9006	217912	1	23.9	4512.88	1888	135.45
08/07 13:30:00	21.15	23.9012	23.9006	23.9006	23.9006	23.9006	219089	1	23.9	4512.79	1889	135.45
08/07 13:35:00	21.0583	23.9012	23.9006	23.9006	23.9006	23.9006	219793	1	23.9	4512.7	1890	135.45
08/07 13:40:00	20.9667	23.9012	23.9006	23.9006	23.9006	23.9006	220277	1	23.9	4512.63	1891	135.45
08/07 13:45:00	20.875	23.9012	23.9006	23.9006	23.9006	23.9006	220639	1	23.9	4512.58	1892	135.45
08/07 13:50:00	20.7833	23.9012	23.9006	23.9006	23.9006	23.9007	220885	1	23.9	4512.54	1893	135.45
08/07 13:55:00	20.6917	23.9012	23.9006	23.9006	23.9006	23.9007	221039	1	23.9	4512.5	1894	135.45
08/07 14:00:00	20.6	23.9012	23.9006	23.9006	23.9006	23.9007	221107	1	23.9	4512.49	1895	135.45
08/07 14:05:00	20.6	23.9011	23.9006	23.9006	23.9006	23.9006	221362	1	23.9	4512.19	1896	151.91
08/07 14:10:00	20.6	23.9011	23.9005	23.9005	23.9005	23.9006	221682	1	23.9	4511.92	1897	151.91
08/07 14:15:00	20.6	23.901	23.9005	23.9005	23.9005	23.9005	222048	1	23.9	4511.68	1898	151.91
08/07 14:20:00	20.6	23.901	23.9005	23.9004	23.9005	23.9005	222431	1	23.9	4511.48	1899	151.91
08/07 14:25:00	20.6	23.901	23.9005	23.9004	23.9005	23.9004	222819	1	23.9	4511.3	1900	151.91
08/07 14:30:00	20.6	23.901	23.9004	23.9004	23.9004	23.9004	223200	1	23.9	4511.15	1901	151.91
08/07 14:35:00	20.6	23.9009	23.9004	23.9004	23.9004	23.9004	223712	1	23.9	4511.02	1902	151.91
08/07 14:40:00	20.6	23.9009	23.9004	23.9004	23.9004	23.9004	224268	1	23.9	4510.9	1903	151.91
08/07 14:45:00	20.6	23.9009	23.9004	23.9004	23.9004	23.9004	224834	1	23.9	4510.8	1904	151.91
08/07 14:50:00	20.6	23.9009	23.9004	23.9004	23.9004	23.9004	225406	1	23.9	4510.71	1905	151.91
08/07 14:55:00	20.6	23.9009	23.9004	23.9004	23.9004	23.9004	225977	1	23.9	4510.64	1906	151.91
08/07 15:00:00	20.6	23.9008	23.9004	23.9004	23.9004	23.9004	226544	1	23.9	4510.57	1907	151.91
08/07 15:05:00	20.55	23.9009	23.9005	23.9005	23.9006	23.9006	226988	1	23.9	4511.35	1908	160.88
08/07 15:10:00	20.5	23.901	23.9007	23.9007	23.9007	23.9008	227344	1	23.9	4512.07	1909	160.88
08/07 15:15:00	20.45	23.9011	23.9008	23.9008	23.9008	23.9009	227497	1	23.9	4512.71	1910	160.88
08/07 15:20:00	20.4	23.9012	23.9009	23.9009	23.9009	23.901	227562	1	23.9	4513.26	1911	160.88
08/07 15:25:00	20.35	23.9013	23.901	23.901	23.901	23.9011	227550	1	23.9	4513.72	1912	160.88
08/07 15:30:00	20.3	23.9013	23.901	23.9011	23.901	23.9011	227477	1	23.9	4514.11	1913	160.88
08/07 15:35:00	20.25	23.9014	23.9011	23.9011	23.9011	23.9012	227198	1	23.9	4514.44	1914	160.88
08/07 15:40:00	20.2	23.9014	23.9011	23.9011	23.9011	23.9012	226834	1	23.9	4514.73	1915	160.88
08/07 15:45:00	20.15	23.9015	23.9011	23.9012	23.9012	23.9012	226420	1	23.9	4514.97	1916	160.88
08/07 15:50:00	20.1	23.9015	23.9012	23.9012	23.9012	23.9012	226782	1	23.9	4515.23	1917	160.88
08/07 15:55:00	20.05	23.9016	23.9012	23.9012	23.9012	23.9012	226774	1	23.9	4515.42	1918	160.88
08/07 16:00:00	20	23.9016	23.9013	23.9012	23.9012	23.9012	226449	1	23.9	4515.58	1919	160.88
08/07 16:05:00	20	23.9017	23.9013	23.9013	23.9013	23.9013	226317	1	23.9	4516.14	1920	166.88
08/07 16:10:00	20	23.9018	23.9014	23.9014	23.9014	23.9014	226020	1	23.9	4516.63	1921	166.88
08/07 16:15:00	20	23.9018	23.9015	23.9015	23.9015	23.9015	225846	1	23.9	4516.99	1922	166.88
08/07 16:20:00	20	23.9018	23.9015	23.9015	23.9015	23.9015	225634	1	23.9	4517.28	1923	166.88
08/07 16:25:00	20	23.9019	23.9016	23.9015	23.9015	23.9015	225132	1	23.9	4517.52	1924	166.88
08/07 16:30:00	20	23.9019	23.9016	23.9016	23.9016	23.9015	224780	1	23.9	4517.73	1925	166.88
08/07 16:35:00	20	23.902	23.9016	23.9016	23.9016	23.9016	224494	1	23.9	4517.91	1926	166.88
08/07 16:40:00	20	23.902	23.9016	23.9016	23.9016	23.9016	224187	1	23.9	4518.06	1927	166.88
08/07 16:45:00	20	23.902	23.9016	23.9016	23.9016	23.9016	224179	1	23.9	4518.2	1928	166.88
08/07 16:50:00	20	23.902	23.9016	23.9016	23.9016	23.9017	224029	1	23.9	4518.32	1929	166.88
08/07 16:55:00	20	23.902	23.9016	23.9016	23.9017	23.9017	223821	1	23.9	4518.41	1930	166.88
08/07 17:00:00	20	23.9021	23.9017	23.9016	23.9017	23.9017	223593	1	23.9	4518.49	1931	166.88
08/07 17:05:00	19.95	23.9015	23.9013	23.9013	23.9013	23.9014	200757	0.5	23.9	2257.63	1932	153.44
08/07 17:10:00	19.9	23.9014	23.9012	23.9012	23.9012	23.9012	198723	0.5	23.9	2257.34	1933	153.44
08/07 17:15:00	19.85	23.9013	23.9011	23.9011	23.9011	23.9011	197443	0.5	23.9	2257.08	1934	153.44
08/07 17:20:00	19.8	23.9013	23.901	23.901	23.901	23.901	196411	0.5	23.9	2256.87	1935	153.44
08/07 17:25:00	19.75	23.9012	23.9009	23.9009	23.9009	23.9009	195637	0.5	23.9	2256.7	1936	153.44
08/07 17:30:00	19.7	23.9012	23.9009	23.9008	23.9009	23.9008	194870	0.5	23.9	2256.56	1937	153.44
08/07 17:35:00	19.65	23.9012	23.9008	23.9008	23.9008	23.9008	194101	0.5	23.9	2256.44	1938	153.44
08/07 17:40:00	19.6	23.9011	23.9008	23.9007	23.9008	23.9007	193375	0.5	23.9	2256.34	1939	153.44
08/07 17:45:00	19.55	23.9011	23.9007	23.9007	23.9008	23.9007	192678	0.5	23.9	2256.25	1940	153.44
08/07 17:50:00	19.5	23.9011	23.9007	23.9007	23.9007	23.9007	192005	0.5	23.9	2256.17	1941	153.44
08/07 17:55:00	19.45	23.9011	23.9007	23.9007	23.9007	23.9006	191355	0.5	23.9	2256.11	1942	153.44
08/07 18:00:00	19.4	23.9011	23.9007	23.9007	23.9007	23.9006	190725	0.5	23.9	2256.06	1943	153.44
08/07 18:05:00	19.2167	23.9007	23.9005	23.9005	23.9005	23.9005	180396	0	23.9	0	1944	132.1
08/07 18:10:00	19.0333	23.9006	23.9004	23.9004	23.9004	23.9004	175548	0	23.9	0	1945	132.1
08/07 18:15:00	18.85	23.9006	23.9003	23.9003	23.9004	23.9003	163748	0	23.9	0	1946	132.1
08/07 18:20:00	18.6667	23.9005	23.9003	23.9003	23.9003	23.9002	154930	0	23.9	0	1947	132.1
08/07 18:25:00	18.4833	23.9005	23.9002	23.9002	23.9003	23.9002	147954	0	23.9	0	1948	132.1
08/07 18:30:00	18.3	23.9005	23.9002	23.9002	23.9002	23.9001	142209	0	23.9	0	1949	132.1
08/07 18:35:00	18.1167	23.9004	23.9002	23.9002	23.9002	23.9001	137289	0	23.9	0	1950	132.1
08/07 18:40:00	17.9333	23.9004	23.9002	23.9002	23.9002	23.9001	132937	0	23.9	0	1951	132.1
08/07 18:45:00	17.75	23.9004	23.9001	23.9001	23.9002	23.9001	129429	0	23.9	0	1952	132.1
08/07 18:50:00	17.5667	23.9004	23.9001	23.9001	23.9001	23.9001	126384	0	23.9	0	1953	132.1
08/07 18:55:00	17.3833	23.9004	23.9001	23.9001	23.9001	23.9001	123516	0	23.9	0	1954	132.1
08/07 19:00:00	17.2	23.9004	23.9001	23.9001	23.9001	23.9001	120207	0	23.9	0	1955	132.1
08/07 19:05:00	17.0667	24.1699	24.1941	24.2833	24.2624	24.5119	7.48995	0	27.9165	0	1956	119.44
08/07 19:10:00	16.9333	24.4608	24.4532	24.6141	24.5695	24.9948	7.47325	0	27.9165	0	1957	119.44
08/07 19:15:00	16.8	24.6621	24.5817	24.777	24.7117	25.1996	7.47264	0	27.9165	0	1958	119.44
08/07 19:20:00	16.6667	24.766	24.6252	24.8335	24.7544	25.2558	7.4844	0	27.9165	0	1959	119.44
08/07 19:25:00	16.5333	24.8414	24.6442	24.86	24.7687	25.2721	7.49002	0	27.9165	0	1960	119.44
08/07 19:30:00	16.4	24.8982	24.6497	24.8698	24.7678	25.268	7.47934	0	27.9165	0	1961	119.44
08/07 19:35:00	16.2667	24.9427	24.6476	24.8702	24.7587	25.2534	7.47208	0	27.9165	0	1962	119.44
08/07 19:40:00	16.1333	24.9783	24.6409	24.8649	24.7449	25.2335	7.47906	0	27.9165	0	1963	119.44
08/07 19:45:00	16	25.007	24.6314	24.8562	24.7285	25.2111	7.49163	0	27.9165	0	1964	119.44
08/07 19:50:00	15.8667	25.0308	24.6201	24.8452	24.7106	25.1874	7.48618	0	27.9165	0	1965	119.44
08/07 19:55:00	15.7333	25.0513	24.6075	24.8327	24.6919	25.1634	7.47295	0	27.9165	0	1966	119.44
08/07 20:00:00	15.6	25.0689	24.5941	24.8191	24.6727	25.1394	7.47494	0	27.9165	0	1967	119.44
08/07 20:05:00	15.5	25.0627	24.5619	24.7866	24.6352	25.0976	3.52163	0	27.9165	0	1968	121.42
08/07 20:10:00	15.4	25.0566	24.5378	24.7621	24.6059	25.0646	3.52621	0	27.9165	0	1969	121.42
08/07 20:15:00	15.3	25.0518	24.5177	24.7416	24.5811	25.0365	3.5274	0	27.9165	0	1970	121.42
08/07 20:20:00	15.2	25.0478	24.4997	24.7229	24.5586	25.0111	3.52338	0	27.9165	0	1971	121.42
08/07 20:25:00	15.1	25.0444	24.4827	24.7052	24.5375	24.9873	3.51907	0	27.9165	0	1972	121.42
08/07 20:30:00	15	25.0414	24.4662	24.6878	24.5171	24.9646	3.51661	0	27.9165	0	1973	121.42
08/07 20:35:00	14.9	25.0388	24.4499	24.6706	24.4972	24.9425	3.51584	0	27.9165	0	1974	121.42
08/07 20:40:00	14.8	25.0365	24.4337	24.6534	24.4775	24.9209	3.51663	0	27.9165	0	1975	121.42
08/07 20:45:00	14.7	25.0344	24.4175	24.6361	24.4581	24.8996	3.51884	0	27.9165	0	1976	121.42
08/07 20:50:00	14.6	25.0326	24.4012	24.6186	24.4387	24.8786	3.52238	0	27.9165	0	1977	121.42
08/07 20:55:00	14.5	25.031	24.3849	24.601	24.4195	24.8579	3.52715	0	27.9165	0	1978	121.42
08/07 21:00:00	14.4	25.0295	24.3685	24.5833	24.4003	24.8373	3.5274	0	27.9165	0	1979	121.42
08/07 21:05:00	14.3583	25.028	24.3536	24.5671	24.3828	24.8186	2.20212	0	27.9165	0	1980	109.51
08/07 21:10:00	14.3167	25.0263	24.3394	24.5517	24.3662	24.8008	2.2003	0	27.9165	0	1981	109.51
08/07 21:15:00	14.275	25.0247	24.3257	24.5367	24.3501	24.7836	2.19897	0	27.9165	0	1982	109.51
08/07 21:20:00	14.2333	25.0232	24.3122	24.5219	24.3343	24.7668	2.1981	0	27.9165	0	1983	109.51
08/07 21:25:00	14.1917	25.0218	24.2988	24.5072	24.3188	24.7503	2.19766	0	27.9165	0	1984	109.51
08/07 21:30:00	14.15	25.0203	24.2856	24.4926	24.3034	24.7341	2.19763	0	27.9165	0	1985	109.51
08/07 21:35:00	14.1083	25.0189	24.2724	24.4781	24.2882	24.718	2.198	0	27.9165	0	1986	109.51
08/07 21:40:00	14.0667	25.0176	24.2593	24.4636	24.2732	24.7021	2.19873	0	27.9165	0	1987	109.51
08/07 21:45:00	14.025	25.0162	24.2462	24.4491	24.2582	24.6863	2.19982	0	27.9165	0	1988	109.51
08/07 21:50:00	13.9833	25.0148	24.2331	24.4346	24.2433	24.6706	2.20125	0	27.9165	0	1989	109.51
08/07 21:55:00	13.9417	25.0134	24.2201	24.4202	24.2286	24.6551	2.20299	0	27.9165	0	1990	109.51
08/07 22:00:00	13.9	25.012	24.2071	24.4058	24.2139	24.6396	2.20505	0	27.9165	0	1991	109.51
08/07 22:05:00	13.85	25.0106	24.1938	24.3911	24.199	24.6239	2.20513	0	27.9165	0	1992	84.46
08/07 22:10:00	13.8	25.0092	24.1805	24.3763	24.1841	24.6082	2.20298	0	27.9165	0	1993	84.46
08/07 22:15:00	13.75	25.0078	24.1671	24.3615	24.1692	24.5925	2.20096	0	27.9165	0	1994	84.46
08/07 22:20:00	13.7	25.0063	24.1537	24.3466	24.1543	24.5767	2.19943	0	27.9165	0	1995	84.46
08/07 22:25:00	13.65	25.0049	24.1402	24.3318	24.1394	24.561	2.19837	0	27.9165	0	1996	84.46
08/07 22:30:00	13.6	25.0034	24.1267	24.3169	24.1246	24.5453	2.19775	0	27.9165	0	1997	84.46
[truncated: 6,930 more rows]
