# Supplementary material for: Multi-Objective Control of Air Conditioning Improves Cost, Comfort and System Energy Balance
Source: Preprints.org preprint supplement (doi:10.20944/preprints201808.0120.v3), 2018-09-10
Supplement: Supplementary file 10 [file result graphs and tables 3.xlsx]

## Sheet: Sheet1
extract data below from final/Window_Shifting_Graphs/Plot_1.html using final/extract_plot_data.ipynb
CCPSO											best for each penalty factor (note: the optimizations for 0.0019 and 0.0029 were especially effective, so they tend to dominate; we need to get PSO to converge more tightly)
discomfort penalty	cost	discomfort	discomfort (all floors)	discomfort cost	total cost							0.0017	0.0019	0.0021	0.0023	0.0025	0.0027	0.0029	0.0032
0.0017	9554.25	385428	4.23971e+06	655.227	10209.5							16761.8	17609.7	18457.6	19305.6	20153.5	21001.5	21849.4	23121.3
0.0019	9560.61	366576	4.03234e+06	696.495	10257.1							16415.6	17222.1	18028.5	18835	19641.5	20447.9	21254.4	22464.1
0.0021	9666.15	331039	3.64143e+06	695.182	10361.3							15856.6	16584.9	17313.1	18041.4	18769.7	19498	20226.3	21318.7
0.0023	9742.93	290778	3.19856e+06	668.79	10411.7							15180.5	15820.2	16459.9	17099.6	17739.3	18379	19018.8	19978.3
0.0025	9766.17	279296	3.07225e+06	698.239	10464.4							14989	15603.4	16217.9	16832.3	17446.8	18061.2	18675.7	19597.4
0.0027	9813.98	253244	2.78568e+06	683.759	10497.7							14549.6	15106.8	15663.9	16221	16778.2	17335.3	17892.5	18728.2
0.0029	9884.08	215589	2.37148e+06	625.209	10509.3							13915.6	14389.9	14864.2	15338.5	15812.8	16287.1	16761.4	17472.8
0.0032	9890.95	224497	2.46946e+06	718.389	10609.3							14089	14582.9	15076.8	15570.7	16064.6	16558.5	17052.4	17793.2
Night setback 72.5°	11501.7	69412	763532	Night setback 72.5°_x000D_(11,502, 763,532)
Night setback 75°	10039.7	401056	4.41162e+06
Brick-wall PSO	9623.94	370099	4.07109e+06
w (as used)	0.0017	0.0025	0.0032		latex
w (÷11 for all floors)	0.000154545	0.000227273	0.000290909
Electricity Cost
Night setback 72.5°	11501.7	11501.7	11501.7		Night setback 72.5° & 11,502 & 11,502 & 11,502 \\
Night setback 75°	10039.7	10039.7	10039.7		Night setback 75° & 10,040 & 10,040 & 10,040 \\
Brick-wall PSO	9623.94	9623.94	9623.94		Brick-wall PSO & 9,624 & 9,624 & 9,624 \\
CCPSO	9554.25	9766.17	9890.95		CCPSO & 9,554 & 9,766 & 9,891
Discomfort Cost
Night setback 72.5°	118	173.53	222.118		Night setback 72.5° & 118 & 174 & 222 \\
Night setback 75°	681.795	1002.64	1283.38		Night setback 75° & 682 & 1,003 & 1,283 \\
Brick-wall PSO	629.168	925.247	1184.32		Brick-wall PSO & 629 & 925 & 1,184 \\
CCPSO	655.227	698.239	718.389		CCPSO & 655 & 698 & 718
Total Cost
Night setback 72.5°	11619.7	11675.2	11723.8		Night setback 72.5° & 11,620 & 11,675 & 11,724 \\
Night setback 75°	10721.5	11042.4	11323.1		Night setback 75° & 10,722 & 11,042 & 11,323 \\
Brick-wall PSO	10253.1	10549.2	10808.3		Brick-wall PSO & 10,253 & 10,549 & 10,808 \\
CCPSO	10209.5	10464.4	10609.3		CCPSO & 10,209 & 10,464 & 10,609
