# Supplementary material for: Multi-Objective Control of Air Conditioning Improves Cost, Comfort and System Energy Balance
Source: Preprints.org preprint supplement (doi:10.20944/preprints201808.0120.v3), 2018-09-10
Supplement: Supplementary file 11 [file results summary and graphs original outputs.xlsx]

## Sheet: ccpso_summary
													summed discomfort index (106 °F2·person·hour)
	scenario	cost	discomfort	w per million person deg^2
	Corbin_NoTerm20e-3	9684.96	3.53501e+06
	Corbin_WithTerm_10e-3	9665.53	3.57938e+06
	0.0017	9599.48	3.83158e+06	154.545
	0.0019	9598.54	3.60672e+06	172.727
	0.00211	9707.85	3.29675e+06	191.818
	0.0023	9759.42	2.84947e+06	209.091
	0.0025	9776.88	2.7677e+06	227.273
	0.0027	9804.89	2.47255e+06	245.455
	0.0032	9892.84	2.17632e+06	290.909
	0.0029	9882.29	2.1233e+06	263.636
	0.03	10120.1	3.64834e+06	2727.27
	0.04	11452.9	171731	3636.36
					w
					0.000172727
night setback	scenario	cost	discomfort		total cost
	22.5	11495.9	129402	129402	11518.2
	22.625	11361.8	169200	169200	11391.1
	22.75	11233.3	260680	260680	11278.3
	22.875	11106.2	403031	403031	11175.8	maybe heuristic unerperforms because (a) it shifts T when prices move, not aiming for lowest
	23	10987.3	598438	598438	11090.7	and (b) it jumps t up and down a lot, which puts the chiller in high/low power mode, both of
	23.125	10875	846311	846311	11021.2	which are ineffient (best to run in the middle, less drag on fluids, fan, less T diff needed, etc.)
	23.25	10761.1	1.14957e+06	1.14957e+06	10959.7
	23.375	10644.9	1.50574e+06	1.50574e+06	10905	also,lnear one cn't wrk because it can't anticipate coasting or failing to coast (among oher if/then effects)?
	23.5	10543.8	1.91475e+06	1.91475e+06	10874.6
	23.625	10446.9	2.37545e+06	2.37545e+06	10857.2
	23.75	10359.3	2.8903e+06	2.8903e+06	10858.5
	23.875	10275	3.46005e+06	3.46005e+06	10872.6		for customer with preference of 1.7e-3/11, comparing strategies with similar comfort, we get this
	24	10192.1	4.08344e+06	4.08344e+06	10897.4		strategy	param	cost	discomfort	discomfort cost	total cost
	24.125	10117.8	4.76184e+06	4.76184e+06	10940.3		CCPSO	w=155e-6
	24.25	10062	5.49512e+06	5.49512e+06	11011.2		Corbin	22.5 +/- 1
	24.375	10021.7		6.28467e+06	11107.3		night setback	75°F
loew	scenario	cost	discomfort		total cost
	0.01	11902.1	134298	134298	11925.3
	0.0077043	11766.4	203896	203896	11801.6
	0.00593563	11631.2	304896	304896	11683.8
	0.00457299	11472.1	450255	450255	11549.9
	0.00352317	11320.7	662741	662741	11435.2
	0.00271436	11179.7	946200	946200	11343.2
	0.00209122	11042.7	1.33933e+06	1.33933e+06	11274
	0.00161114	10956	1.77605e+06	1.77605e+06	11262.7
	0.00124127	10893.7	2.30425e+06	2.30425e+06	11291.7
	0.000956313	10836.1	2.92854e+06	2.92854e+06	11341.9
	0.000736772	10788.2	3.62493e+06	3.62493e+06	11414.3
	0.000567632	10762.6	4.30616e+06	4.30616e+06	11506.4
	0.000437321	10726.7	4.96203e+06	4.96203e+06	11583.8
	0.000336925	10715	5.46098e+06	5.46098e+06	11658.2
	0.000259577	10667.8	5.77604e+06	5.77604e+06	11665.5
	0.000199986	10605.9	6.16623e+06	6.16623e+06	11671
													best wih no overchill (left group) and weak price response (k=3) and narrower temp band (2.77, not 5.55)
transactive	scenario	cost	discomfort		total cost	t_up (F)	t_up/k (rise per std. dev of price)						k
	0	11052.4	1.86041e+07		14265.9	10	10						1
	1	10621.3	6.22816e+06		11697	10	5	min disc val	max disc val				2
comfortable economy	2	10620.8	2.93615e+06		11128	10	3.33333	-169.411	-318.892				3
	3	10621.3	6.22816e+06		11697	5	5						1
balanced comfort	4	10701.1	1.74106e+06		11001.8	5	2.5						2
maximum comfort	5	10857.6	866146		11007.2	5	1.66667						3
	6	11156.2	1.8368e+07	prechill	14328.8	10	10						1
	7	10753.5	6.22058e+06	prechill	11827.9	10	5						2
comfortable economy	8	10719.5	2.94413e+06	prechill	11228.1	10	3.33333						3
	9	10814.9	6.2257e+06	prechill	11890.3	5	5						1
	10	10839.8	1.78052e+06	prechill	11147.3	5	2.5						2
	11	10950.3	899522	prechill	11105.7	5	1.66667						3
from result graphs and tables 3.xlsx
original	CCPSO
	discomfort penalty	cost	discomfort	discomfort (all floors)	penalty (all floors)	total cost
	0.0017	9554.25	385428	4.23971e+06	0.000154545	10286.6
	0.0019	9560.61	366576	4.03234e+06	0.000172727	10257.1
	0.0021	9666.15	331039	3.64143e+06	0.000190909	10295.1
	0.0023	9742.93	290778	3.19856e+06	0.000209091	10295.4
	0.0025	9766.17	279296	3.07225e+06	0.000227273	10296.8
	0.0027	9813.98	253244	2.78568e+06	0.000245455	10295.1
	0.0029	9884.08	215589	2.37148e+06	0.000263636	10293.7
	0.0032	9890.95	224497	2.46946e+06	0.000290909	10317.5
						total cost
	Occ.-based 72.5°	11501.7	69412	763532		11633.6				check implied total cost
	Occ.-based 75°	10039.7	401056	4.41162e+06		10801.7				10192.1	10192.1	1.72331e-08
	Brick-wall w/term	9623.94	370099	4.07109e+06		10327.1				10762.6	10762.6	2.91784e-08
	Brick-wall w/o term	9642.17	364306	30358.8						10620.8	10620.8	-7.8453e-09
										9623.94	9623.94	0.0003888
	Data for PSO from "code and data/final/energy_stats.csv", created by "code and data/final/aggregate_energy_data6.ipynb"									9560.61	9560.62	0.000463139
	data for other strategies from benchmarks/results/cost_statistics.csv, created by benchmarks/benchmarks.py
	Control strategy	Parameters used	Discomfort index ($10^6$ °F$^2$$\cdot$person$\cdot$hour)	Total electricity cost (\$)	Avg. HVAC electrical load (kW)	Avg. load during 5\% highest-price hours (kW)	Avg. load during 5\% lowest-price hours (kW)	Avg. price for all power used (\$/MWh)		Control strategy & Parameters used & Discomfort index ($10^6$ °F$^2$$\cdot$person$\cdot$hour) & Total electricity cost (\$) & Avg. HVAC electrical load (kW) & Avg. load during 5\% highest-price hours (kW) & Avg. load during 5\% lowest-price hours (kW) & Avg. price for all power used (\$/MWh) \\
	CCPSO	$w$=173	4.03234e+06	9560.61	166.017	270.762	205.372	77.4036		CCPSO & $w$=173 & 4,032,341 & 0.0 & 166 & 271 & 205 & 77
	Brick-wall PSO	N/A	4.07109e+06	9623.94	164.389	279.455	177.875	78.6876		Brick-wall PSO & N/A & 4,071,087 & 0.0 & 164 & 279 & 178 & 79
	Night setback	75°F	4.08344e+06	10192.1	159.741	313.748	1.91403	85.7583		Night setback & 75°F & 4,083,444 & 0.0 & 160 & 314 & 2 & 86
	Transactive power	\makecell[rt]{$k$=3,\\–0/+10°F}	2.93615e+06	10620.8	171.446	282.745	0.00244399	83.2643		Transactive power & \makecell[rt]{$k$=3,\\–0/+10°F} & 2,936,151 & 0.0 & 171 & 283 & 0 & 83
	Linear building opt.	$w$=568	4.30616e+06	10762.6	216.161	219.081	268.67	66.9216		Linear building opt. & $w$=568 & 4,306,157 & 0.0 & 216 & 219 & 269 & 67
									fmt
	Control strategy	CCPSO	Brick-wall PSO	Night setback	Transactive power	Linear building opt.				Control strategy & CCPSO & Brick-wall PSO & Night setback & Transactive power & Linear building opt. \\
	Parameters used	$w$=173	N/A	75°F	\makecell[rt]{$k$=3,\\–0/+10°F}	$w$=568				Parameters used & $w$=173 & N/A & 75°F & \makecell[rt]{$k$=3,\\–0/+10°F} & $w$=568 \\
	Discomfort index ($10^6$ °F$^2$$\cdot$person$\cdot$hour)	4.03234e+06	4.07109e+06	4.08344e+06	2.93615e+06	4.30616e+06			#,##0.0,,	Discomfort index ($10^6$ °F$^2$$\cdot$person$\cdot$hour) & 4.0 & 4.1 & 4.1 & 2.9 & 4.3 \\
	Total electricity cost (\$)	9560.61	9623.94	10192.1	10620.8	10762.6			#,##0	Total electricity cost (\$) & 9,561 & 9,624 & 10,192 & 10,621 & 10,763 \\
	Avg. HVAC electrical load (kW)	166.017	164.389	159.741	171.446	216.161			#,##0	Avg. HVAC electrical load (kW) & 166 & 164 & 160 & 171 & 216 \\
	Avg. load during 5\% highest-price hours (kW)	270.762	279.455	313.748	282.745	219.081			#,##0	Avg. load during 5\% highest-price hours (kW) & 271 & 279 & 314 & 283 & 219 \\
	Avg. load during 5\% lowest-price hours (kW)	205.372	177.875	1.91403	0.00244399	268.67			#,##0	Avg. load during 5\% lowest-price hours (kW) & 205 & 178 & 2 & 0 & 269 \\
	Avg. price for all power used (\$/MWh)	77.4036	78.6876	85.7583	83.2643	66.9216			#,##0.0	Avg. price for all power used (\$/MWh) & 77.4 & 78.7 & 85.8 & 83.3 & 66.9 \\
